# Supplementary material for: Rates of Mutation and Host Transmission for an Escherichia coli Clone over 3 Years
Source: PubMed Central journal article supplement (PMC3203180; doi:10.1371/journal.pone.0026907), 2011-10-27
Supplement: pone.0026907.s002.pdf [file pone.0026907.s002.pdf]

**Table S1** Clone D genes and products. All genes are shown with locus tag, start and end positions, name and gene product.

| <b>Locus_tag</b> | <b>Type</b> | <b>start</b> | <b>End</b> | <b>+/-<sup>a</sup></b> | <b>Gene<sup>b</sup></b> | <b>Product</b>                                           |
|------------------|-------------|--------------|------------|------------------------|-------------------------|----------------------------------------------------------|
| i02_5004         | CDS         | 190          | 255        | +                      | thrL                    | thr operon leader peptide homoserine kinase              |
| i02_0001         | CDS         | 336          | 2798       | +                      | thrA                    | bifunctional aspartokinase I/homoserine                  |
| i02_0002         | CDS         | 2800         | 3732       | +                      | thrB                    | homoserine kinase                                        |
| i02_0003         | CDS         | 3733         | 5019       | +                      | thrC                    | threonine synthase                                       |
| i02_0004         | CDS         | 5087         | 5236       | +                      | /                       | hypothetical protein                                     |
| i02_0005         | CDS         | 5233         | 5529       | +                      | yaaX                    | hypothetical protein                                     |
| i02_0006         | CDS         | 5589         | 6365       | -                      | yaaA                    | hypothetical protein                                     |
| i02_0007         | CDS         | 6435         | 7865       | -                      | yaaJ                    | putative transporter yaaJ                                |
| i02_0008         | CDS         | 8144         | 9097       | +                      | talB                    | transaldolase B                                          |
| i02_0009         | CDS         | 9209         | 9799       | +                      | mogA                    | molybdenum cofactor biosynthesis protein                 |
| i02_0010         | CDS         | 10004        | 10570      | -                      | yaaH                    | hypothetical protein                                     |
| i02_0011         | CDS         | 10719        | 11432      | -                      | yaaW                    | hypothetical protein                                     |
| i02_0012         | CDS         | 11458        | 11862      | -                      | yaaI                    | hypothetical protein                                     |
| i02_0013         | CDS         | 12234        | 14150      | +                      | dnaK                    | molecular chaperone DnaK                                 |
| i02_0014         | CDS         | 14239        | 15369      | +                      | dnaJ                    | chaperone protein DnaJ                                   |
| i02_0015         | CDS         | 16241        | 17002      | +                      | /                       | hypothetical protein                                     |
| i02_0016         | CDS         | 16986        | 18515      | +                      | /                       | hypothetical protein                                     |
| i02_0017         | CDS         | 18638        | 19903      | +                      | /                       | hypothetical protein                                     |
| i02_0018         | CDS         | 20138        | 21304      | +                      | nhaA                    | pH-dependent sodium/proton antiporter                    |
| i02_0019         | CDS         | 21364        | 22269      | +                      | nhaR                    | transcriptional activator NhaR                           |
| i02_0020         | CDS         | 22236        | 22364      | -                      | /                       | hypothetical protein                                     |
| i02_0021         | CDS         | 22365        | 22628      | -                      | rpsT                    | 30S ribosomal protein S20                                |
| i02_0022         | CDS         | 22731        | 22949      | +                      | yaaY                    | hypothetical protein                                     |
| i02_0023         | CDS         | 22957        | 23898      | +                      | ribF                    | bifunctional riboflavin kinase/FMN                       |
| i02_0024         | CDS         | 23941        | 26757      | +                      | ileS                    | isoleucyl-tRNA synthetase                                |
| i02_0025         | CDS         | 26757        | 27251      | +                      | lspA                    | lipoprotein signal peptidase                             |
| i02_0026         | CDS         | 27359        | 27808      | +                      | slpA                    | FKBP-type 16 kDa peptidyl-prolyl cis-trans               |
| i02_0027         | CDS         | 27810        | 28760      | +                      | ispH                    | 1-hydroxy-2-methyl-2-(E)-butenyl 4-diphosphate reductase |
| i02_0028         | pseudo      | 28826        | 29740      | +                      | rihC                    | ribonucleoside hydrolase RihC                            |
| i02_0029         | CDS         | 29763        | 30128      | +                      | /                       | hypothetical protein                                     |
| i02_0030         | CDS         | 30289        | 31110      | +                      | dapB                    | dihydrodipicolinate reductase                            |
| i02_0031         | CDS         | 31152        | 31319      | -                      | /                       | hypothetical protein                                     |
| i02_0032         | CDS         | 31389        | 31526      | +                      | /                       | hypothetical protein                                     |
| i02_0033         | CDS         | 31539        | 32714      | +                      | carA                    | carbamoyl phosphate synthase small subunit               |
| i02_0034         | CDS         | 32732        | 35953      | +                      | carB                    | carbamoyl phosphate synthase large subunit               |
| i02_0035         | CDS         | 35961        | 36179      | -                      | /                       | hypothetical protein                                     |
| i02_0036         | CDS         | 36109        | 36609      | +                      | caiF                    | DNA-binding transcriptional activator CaiF               |
| i02_0037         | CDS         | 36728        | 37339      | -                      | caiE                    | carnitine operon protein CaiE                            |
| i02_0038         | CDS         | 37324        | 38109      | -                      | caiD                    | carnitiny-CoA dehydratase                                |
| i02_0039         | CDS         | 38218        | 39786      | -                      | caiC                    | putative crotonobetaine/carnitine-CoA ligase             |
| i02_0040         | CDS         | 39844        | 41061      | -                      | caiB                    | crotonobetainyl-CoA:carnitine CoA-transferase            |
| i02_0041         | CDS         | 41189        | 42331      | -                      | caiA                    | crotonobetainyl-CoA dehydrogenase                        |
| i02_0042         | CDS         | 42362        | 43876      | -                      | caiT                    | L-carnitine/gamma-butyrobetaine antiporter               |
| i02_0043         | CDS         | 44286        | 45119      | +                      | fixA                    | putative electron transfer flavoprotein FixA             |
| i02_0044         | CDS         | 45134        | 46075      | +                      | fixB                    | putative electron transfer flavoprotein FixB             |
| i02_0045         | CDS         | 46098        | 47384      | +                      | fixC                    | putative oxidoreductase FixC                             |
| i02_0046         | CDS         | 47381        | 47668      | +                      | fixX                    | ferredoxin-like protein                                  |
| i02_0047         | CDS         | 47727        | 49058      | +                      | yaaU                    | metabolite transporter                                   |
| i02_0048         | CDS         | 49166        | 49696      | +                      | yabF                    | glutathione-regulated potassium-efflux system            |
| i02_0049         | CDS         | 49617        | 51551      | +                      | kefC                    | glutathione-regulated potassium-efflux system            |
| i02_0050         | CDS         | 51608        | 52222      | +                      | folA                    | dihydrofolate reductase                                  |
| i02_0051         | CDS         | 52308        | 52541      | +                      | /                       | putative antitoxin of gyrase inhibiting                  |
| i02_0052         | CDS         | 52544        | 52858      | +                      | /                       | putative toxin of gyrase inhibiting                      |
| i02_0053         | CDS         | 52855        | 53703      | -                      | apaH                    | diadenosine tetraphosphatase                             |

| Locus_tag | Type | start  | End    | +/- <sup>a</sup> | Gene <sup>b</sup> | Product                                                           |
|-----------|------|--------|--------|------------------|-------------------|-------------------------------------------------------------------|
| i02_0054  | CDS  | 53710  | 54087  | -                | apaG              | ApaG                                                              |
| i02_0055  | CDS  | 54090  | 54911  | -                | ksgA              | dimethyladenosine transferase                                     |
| i02_0056  | CDS  | 54908  | 55897  | -                | pdxA              | 4-hydroxythreonine-4-phosphate dehydrogenase                      |
| i02_0057  | CDS  | 55897  | 57183  | -                | surA              | peptidyl-prolyl cis-trans isomerase SurA                          |
| i02_0058  | CDS  | 57236  | 59590  | -                | imp               | organic solvent tolerance protein                                 |
| i02_0059  | CDS  | 59752  | 60660  | +                | djlA              | Dna-J like membrane chaperone protein                             |
| i02_0060  | CDS  | 60778  | 61437  | -                | yabO              | 23S rRNA/tRNA pseudouridine synthase A                            |
| i02_0061  | CDS  | 61449  | 64355  | -                | hepA              | ATP-dependent helicase HepA                                       |
| i02_0062  | CDS  | 64520  | 66871  | -                | polB              | DNA polymerase II                                                 |
| i02_0063  | CDS  | 66946  | 67641  | -                | araD              | L-ribulose-5-phosphate 4-epimerase                                |
| i02_0064  | CDS  | 67926  | 69428  | -                | araA              | L-arabinose isomerase                                             |
| i02_0065  | CDS  | 69439  | 71139  | -                | araB              | ribulokinase                                                      |
| i02_0066  | CDS  | 71427  | 72323  | +                | araC              | DNA-binding transcriptional regulator AraC                        |
| i02_0067  | CDS  | 72588  | 72710  | +                | /                 | hypothetical protein                                              |
| i02_0068  | CDS  | 72834  | 73070  | +                | /                 | hypothetical protein                                              |
| i02_0069  | CDS  | 73112  | 73684  | +                | /                 | hypothetical protein                                              |
| i02_0070  | CDS  | 73691  | 74113  | +                | /                 | hypothetical protein                                              |
| i02_0071  | CDS  | 74268  | 75032  | +                | yabl              | hypothetical protein                                              |
| i02_0072  | CDS  | 75146  | 75844  | -                | thiQ              | thiamine transporter ATP-binding subunit                          |
| i02_0073  | CDS  | 75828  | 77438  | -                | thiP              | thiamine transporter membrane protein                             |
| i02_0074  | CDS  | 77414  | 78409  | -                | tbpA              | thiamine transporter substrate binding subunit                    |
| i02_0075  | CDS  | 78441  | 78560  | -                | /                 | hypothetical protein                                              |
| i02_0076  | CDS  | 78561  | 80237  | -                | yabN              | transcriptional regulator SgrR                                    |
| i02_0077  | CDS  | 80305  | 80436  | +                | /                 | hypothetical protein                                              |
| i02_0078  | CDS  | 80544  | 81149  | -                | leuD              | isopropylmalate isomerase small subunit                           |
| i02_0079  | CDS  | 81160  | 82560  | -                | leuC              | isopropylmalate isomerase large subunit                           |
| i02_0080  | CDS  | 82563  | 83657  | -                | leuB              | 3-isopropylmalate dehydrogenase                                   |
| i02_0081  | CDS  | 83654  | 85267  | -                | leuA              | 2-isopropylmalate synthase                                        |
| i02_0082  | CDS  | 85316  | 85402  | -                | leuL              | leu operon leader peptide                                         |
| i02_0083  | CDS  | 85976  | 87004  | +                | leuO              | leucine transcriptional activator                                 |
| i02_0084  | CDS  | 87040  | 87168  | -                | /                 | hypothetical protein                                              |
| i02_0085  | CDS  | 87232  | 89046  | +                | ilvI              | acetolactate synthase 3 catalytic subunit                         |
| i02_0086  | CDS  | 89019  | 89540  | +                | ilvH              | acetolactate synthase 3 regulatory subunit                        |
| i02_0087  | CDS  | 89592  | 89723  | +                | /                 | hypothetical protein                                              |
| i02_0088  | CDS  | 89720  | 90724  | +                | fruR              | DNA-binding transcriptional regulator FruR                        |
| i02_0089  | CDS  | 90886  | 91002  | -                | /                 | hypothetical protein                                              |
| i02_0090  | CDS  | 91290  | 91784  | +                | yabB              | cell division protein MraZ                                        |
| i02_0091  | CDS  | 91687  | 92727  | +                | mraW              | S-adenosyl-methyltransferase MraW                                 |
| i02_0092  | CDS  | 92724  | 93089  | +                | ftsL              | cell division protein FtsL                                        |
| i02_0093  | CDS  | 93105  | 94871  | +                | ftsI              | peptidoglycan synthetase ftsI precursor                           |
| i02_0094  | CDS  | 94858  | 96345  | +                | murE              | UDP-N-acetylmuramoylalanyl-D-glutamate 2,6-diaminopimelate ligase |
| i02_0095  | CDS  | 96342  | 97700  | +                | murF              | D-alanyl-D-alanine-adding enzyme                                  |
| i02_0096  | CDS  | 97694  | 98776  | +                | mraY              | phospho-N-acetylmuramoyl-pentapeptide transferase                 |
| i02_0097  | CDS  | 98779  | 100095 | +                | murD              | UDP-N-acetylmuramoyl-L-alanine:D-glutamate ligase                 |
| i02_0098  | CDS  | 100092 | 101339 | +                | ftsW              | cell division protein FtsW                                        |
| i02_0099  | CDS  | 101336 | 102403 | +                | murG              | N-acetylglucosaminyl transferase                                  |
| i02_0100  | CDS  | 102457 | 103932 | +                | murC              | UDP-N-acetylmuramate--L-alanine ligase                            |
| i02_0101  | CDS  | 103925 | 104845 | +                | ddl               | D-alanine--D-alanine ligase                                       |
| i02_0102  | CDS  | 104847 | 105677 | +                | ftsQ              | cell division protein FtsQ                                        |
| i02_0103  | CDS  | 105674 | 106936 | +                | ftsA              | cell division protein FtsA                                        |
| i02_0104  | CDS  | 106997 | 108148 | +                | ftsZ              | cell division protein FtsZ                                        |
| i02_0105  | CDS  | 108249 | 109166 | +                | lpxC              | UDP-3-O-[3-hydroxymyristoyl] N-acetylglucosamine                  |
| i02_0106  | CDS  | 109322 | 109909 | +                | yacA              | SecA regulator SecM                                               |
| i02_0107  | CDS  | 109971 | 112676 | +                | secA              | preprotein translocase subunit SecA                               |

| Locus_tag | Type | start  | End    | +/- <sup>a</sup> | Gene <sup>b</sup> | Product                                            |
|-----------|------|--------|--------|------------------|-------------------|----------------------------------------------------|
| i02_0108  | CDS  | 112736 | 113134 | +                | mutT              | nucleoside triphosphate pyrophosphohydrolase       |
| i02_0109  | CDS  | 113228 | 113758 | +                | /                 | hypothetical protein                               |
| i02_0110  | CDS  | 113858 | 114580 | +                | /                 | transposase insK                                   |
| i02_0111  | CDS  | 114653 | 114850 | -                | yacG              | zinc-binding protein                               |
| i02_0112  | CDS  | 114860 | 115603 | -                | yacF              | hypothetical protein                               |
| i02_0113  | CDS  | 115603 | 116223 | -                | coaE              | dephospho-CoA kinase                               |
| i02_0114  | CDS  | 116448 | 117491 | +                | guaC              | guanosine 5'-monophosphate oxidoreductase          |
| i02_0115  | CDS  | 117526 | 118728 | -                | hofC              | type IV pilin biogenesis protein                   |
| i02_0116  | CDS  | 118718 | 120103 | -                | hofB              | hypothetical protein                               |
| i02_0117  | CDS  | 120113 | 120553 | -                | ppdD              | putative major pilin subunit                       |
| i02_0118  | CDS  | 120757 | 121692 | -                | nadC              | quinolinate phosphoribosyltransferase              |
| i02_0119  | CDS  | 121738 | 122289 | +                | ampD              | N-acetyl-anhydromuranmyl-L-alanine amidase         |
| i02_0120  | CDS  | 122286 | 123140 | +                | ampE              | regulatory protein AmpE                            |
| i02_0121  | CDS  | 123183 | 124553 | -                | aroP              | aromatic amino acid transporter                    |
| i02_0122  | CDS  | 125081 | 126862 | +                | usp               | uropathogenic specific protein                     |
| i02_0123  | CDS  | 126862 | 127158 | +                | /                 | hypothetical protein                               |
| i02_0124  | CDS  | 127132 | 127275 | -                | /                 | hypothetical protein                               |
| i02_0125  | CDS  | 127556 | 127849 | +                | /                 | hypothetical protein                               |
| i02_0126  | CDS  | 127833 | 127955 | -                | /                 | hypothetical protein                               |
| i02_0127  | CDS  | 128245 | 128535 | +                | /                 | hypothetical protein                               |
| i02_0128  | CDS  | 128991 | 129755 | +                | pdhR              | transcriptional regulator PdhR                     |
| i02_0129  | CDS  | 129752 | 129934 | -                | /                 | hypothetical protein                               |
| i02_0130  | CDS  | 129916 | 132579 | +                | aceE              | pyruvate dehydrogenase subunit E1                  |
| i02_0131  | CDS  | 132594 | 134486 | +                | aceF              | dihydrolipoamide acetyltransferase                 |
| i02_0132  | CDS  | 134691 | 136118 | +                | lpdA              | dihydrolipoamide dehydrogenase                     |
| i02_0133  | CDS  | 136360 | 138141 | -                | yacH              | hypothetical protein                               |
| i02_0134  | CDS  | 138343 | 141093 | +                | acnB              | bifunctional aconitate hydratase                   |
| i02_0135  | CDS  | 141220 | 141630 | +                | yacL              | hypothetical protein                               |
| i02_0136  | CDS  | 141668 | 142444 | -                | speD              | S-adenosylmethionine decarboxylase                 |
| i02_0137  | CDS  | 142478 | 143344 | -                | speE              | spermidine synthase                                |
| i02_0138  | CDS  | 143450 | 143968 | -                | yacC              | hypothetical protein                               |
| i02_0139  | CDS  | 143963 | 145519 | +                | yacK              | multicopper oxidase                                |
| i02_0140  | CDS  | 145597 | 148005 | -                | gcd               | glucose dehydrogenase                              |
| i02_0141  | CDS  | 148154 | 148729 | +                | hpt               | hypoxanthine-guanine phosphoribosyltransferase     |
| i02_0142  | CDS  | 148770 | 149432 | -                | yadF              | carbonic anhydrase                                 |
| i02_0143  | CDS  | 149541 | 150467 | +                | yadG              | ABC transporter ATP-binding protein                |
| i02_0144  | CDS  | 150464 | 151234 | +                | yadH              | hypothetical protein                               |
| i02_0145  | CDS  | 151339 | 151779 | +                | yadI              | putative PTS system IIA component yadI             |
| i02_0146  | CDS  | 151843 | 153072 | +                | yadE              | hypothetical protein                               |
| i02_0147  | CDS  | 153076 | 153456 | -                | panD              | aspartate alpha-decarboxylase                      |
| i02_0148  | CDS  | 153424 | 153609 | +                | /                 | hypothetical protein                               |
| i02_0149  | CDS  | 153730 | 154686 | +                | yadD              | hypothetical protein                               |
| i02_0150  | CDS  | 154755 | 154952 | +                | /                 | hypothetical protein                               |
| i02_0151  | CDS  | 155034 | 155885 | -                | panC              | pantoate-beta-alanine ligase                       |
| i02_0152  | CDS  | 155897 | 156691 | -                | panB              | 3-methyl-2-oxobutanoate                            |
| i02_0153  | CDS  | 156803 | 158092 | -                | yadC              | putative fimbrial-like adhesin protein             |
| i02_0154  | CDS  | 158118 | 158714 | -                | yadK              | hypothetical protein                               |
| i02_0155  | CDS  | 158741 | 159355 | -                | yadL              | hypothetical protein                               |
| i02_0156  | CDS  | 159361 | 159927 | -                | yadM              | hypothetical protein                               |
| i02_0157  | CDS  | 159944 | 162532 | -                | htrE              | putative outer membrane usher protein              |
| i02_0158  | CDS  | 162567 | 163307 | -                | ecpD              | putative chaperone protein EcpD                    |
| i02_0159  | CDS  | 163416 | 164030 | -                | yadN              | fimbrial-like protein yadN precursor               |
| i02_0160  | CDS  | 164370 | 164849 | -                | folK              | 2-amino-4-hydroxy-6-hydroxymethylidihydropteridine |
| i02_0161  | CDS  | 164846 | 166264 | -                | pcnB              | poly(A) polymerase I                               |
| i02_0162  | CDS  | 166303 | 167199 | -                | yadB              | glutamyl-Q tRNA(Asp) synthetase                    |
| i02_0163  | CDS  | 167266 | 167739 | -                | dksA              | DnaK transcriptional regulator DksA                |
| i02_0164  | CDS  | 167899 | 168603 | -                | sfsA              | sugar fermentation stimulation protein A           |
| i02_0165  | CDS  | 168618 | 169361 | -                | yadP              | 2'-5' RNA ligase                                   |

| Locus_tag | Type | start  | End    | +/- <sup>a</sup> | Gene <sup>b</sup> | Product                                                      |
|-----------|------|--------|--------|------------------|-------------------|--------------------------------------------------------------|
| i02_0166  | CDS  | 169177 | 171651 | +                | hrpB              | ATP-dependent RNA helicase HrpB                              |
| i02_0167  | CDS  | 171579 | 171746 | -                | /                 | hypothetical protein                                         |
| i02_0168  | CDS  | 171745 | 174279 | +                | mrcB              | penicillin-binding protein 1b                                |
| i02_0169  | CDS  | 174344 | 174526 | -                | /                 | hypothetical protein                                         |
| i02_0170  | CDS  | 174499 | 176757 | +                | fhuA              | ferrichrome outer membrane transporter                       |
| i02_0171  | CDS  | 176808 | 177605 | +                | fhuC              | iron-hydroxamate transporter ATP-binding subunit             |
| i02_0172  | CDS  | 177602 | 178495 | +                | fhuD              | iron-hydroxamate transporter substrate-binding subunit       |
| i02_0173  | CDS  | 178492 | 180474 | +                | fhuB              | iron-hydroxamate transporter permease subunit                |
| i02_0174  | CDS  | 180509 | 181789 | -                | hemL              | glutamate-1-semialdehyde aminotransferase                    |
| i02_0175  | CDS  | 182014 | 183435 | +                | yadQ              | chloride channel protein                                     |
| i02_0176  | CDS  | 183484 | 183861 | +                | yadR              | iron-sulfur cluster insertion protein ErpA                   |
| i02_0177  | CDS  | 183613 | 183873 | -                | /                 | hypothetical protein                                         |
| i02_0178  | CDS  | 183908 | 184531 | -                | yadS              | hypothetical protein                                         |
| i02_0179  | CDS  | 184569 | 185369 | -                | yadT              | vitamin B12-transporter protein BtuF                         |
| i02_0180  | CDS  | 185362 | 186060 | -                | pfs               | 5'-methylthioadenosine/S-adenosylhomocysteine                |
| i02_0181  | CDS  | 186144 | 187661 | +                | dgt               | deoxyguanosinetriphosphate triphosphohydrolase               |
| i02_0182  | CDS  | 187791 | 189215 | +                | htrA              | serine endoprotease                                          |
| i02_0183  | CDS  | 189370 | 190527 | +                | yaeG              | carbohydrate diacid transcriptional activator                |
| i02_0184  | CDS  | 190580 | 190966 | -                | yaeH              | hypothetical protein                                         |
| i02_0185  | CDS  | 191278 | 192102 | -                | dapD              | 2,3,4,5-tetrahydropyridine-2,6-carboxylate                   |
| i02_0186  | CDS  | 192133 | 194805 | -                | glnD              | PII uridylyl-transferase                                     |
| i02_0187  | CDS  | 194867 | 195661 | -                | map               | methionine aminopeptidase                                    |
| i02_0188  | CDS  | 196029 | 196754 | +                | rpsB              | 30S ribosomal protein S2                                     |
| i02_0189  | CDS  | 196706 | 197635 | -                | /                 | hypothetical protein                                         |
| i02_0190  | CDS  | 196889 | 197740 | +                | tsf               | elongation factor Ts                                         |
| i02_0191  | CDS  | 197887 | 198612 | +                | pyrH              | uridylylate kinase                                           |
| i02_0192  | CDS  | 198762 | 199319 | +                | frr               | ribosome recycling factor                                    |
| i02_0193  | CDS  | 199411 | 200607 | +                | dxr               | 1-deoxy-D-xylulose 5-phosphate reductoisomerase              |
| i02_0194  | CDS  | 200793 | 201554 | +                | yaeS              | undecaprenyl pyrophosphate synthase                          |
| i02_0195  | CDS  | 201567 | 202424 | +                | cdsA              | CDP-diglyceride synthase                                     |
| i02_0196  | CDS  | 202391 | 203788 | +                | yaeL              | zinc metallopeptidase RseP                                   |
| i02_0197  | CDS  | 203818 | 206250 | +                | yaeT              | outer membrane protein assembly factor YaeT                  |
| i02_0198  | CDS  | 206372 | 206857 | +                | hlpA              | periplasmic chaperone                                        |
| i02_0199  | CDS  | 206861 | 207886 | +                | lpxD              | UDP-3-O-[3-hydroxymyristoyl] glucosamine                     |
| i02_0200  | CDS  | 207898 | 208446 | +                | fabZ              | (3R)-hydroxymyristoyl-ACP dehydratase                        |
| i02_0201  | CDS  | 208450 | 209238 | +                | lpxA              | UDP-N-acetylglucosamine acyltransferase                      |
| i02_0202  | CDS  | 209238 | 210386 | +                | lpxB              | lipid-A-disaccharide synthase                                |
| i02_0203  | CDS  | 210383 | 210979 | +                | rnhB              | ribonuclease HII                                             |
| i02_0204  | CDS  | 211016 | 214498 | +                | dnaE              | DNA polymerase III subunit alpha                             |
| i02_0205  | CDS  | 214511 | 215470 | +                | accA              | acetyl-CoA carboxylase carboxyltransferase                   |
| i02_0206  | CDS  | 215568 | 217709 | +                | ldcC              | lysine decarboxylase                                         |
| i02_0207  | CDS  | 217739 | 218155 | +                | yaeR              | hypothetical protein                                         |
| i02_0208  | CDS  | 218220 | 219533 | +                | tilS              | tRNA(Ile)-lysine synthetase                                  |
| i02_0209  | CDS  | 219567 | 219827 | -                | yaeO              | Rho-binding antiterminator                                   |
| i02_0210  | CDS  | 219814 | 220014 | -                | /                 | hypothetical protein                                         |
| i02_0211  | CDS  | 220180 | 220725 | +                | yaeQ              | hypothetical protein                                         |
| i02_0212  | CDS  | 220722 | 221144 | +                | yaeJ              | peptidyl-tRNA hydrolase domain protein                       |
| i02_0213  | CDS  | 221158 | 221868 | +                | cutF              | outer membrane lipoprotein NlpE, involved in surface sensing |
| i02_0214  | CDS  | 222016 | 222738 | -                | /                 | transposase insK                                             |
| i02_0215  | CDS  | 222838 | 223368 | -                | /                 | hypothetical protein                                         |
| i02_0216  | CDS  | 223454 | 224278 | -                | yaeF              | hypothetical protein                                         |
| i02_0217  | CDS  | 224331 | 226049 | -                | proS              | prolyl-tRNA synthetase                                       |
| i02_0218  | CDS  | 226160 | 226867 | -                | yaeB              | hypothetical protein                                         |
| i02_0219  | CDS  | 226864 | 227268 | -                | rcsF              | outer membrane lipoprotein                                   |
| i02_0220  | CDS  | 227386 | 228201 | -                | metQ              | DL-methionine transporter substrate-binding                  |

| Locus_tag | Type | start  | End    | +/- <sup>a</sup> | Gene <sup>b</sup> | Product                                        |
|-----------|------|--------|--------|------------------|-------------------|------------------------------------------------|
| i02_0221  | CDS  | 228241 | 228894 | -                | yaeE              | DL-methionine transporter permease subunit     |
| i02_0222  | CDS  | 228887 | 229918 | -                | metN              | DL-methionine transporter ATP-binding subunit  |
| i02_0223  | CDS  | 230106 | 230678 | +                | yaeD              | D,D-heptose 1,7-bisphosphate phosphatase       |
| i02_0224  | CDS  | 230826 | 230987 | -                | /                 | hypothetical protein                           |
| i02_0226  | CDS  | 236327 | 237130 | +                | dkgB              | 2,5-diketo-D-gluconate reductase B             |
| i02_0227  | CDS  | 237127 | 238041 | -                | yafC              | putative transcriptional regulator YafC        |
| i02_0228  | CDS  | 238258 | 239082 | +                | yafD              | hypothetical protein                           |
| i02_0229  | CDS  | 239160 | 239930 | +                | yafE              | hypothetical protein                           |
| i02_0230  | CDS  | 239979 | 241337 | -                | mltD              | membrane-bound lytic murein transglycosylase D |
| i02_0231  | CDS  | 241409 | 242164 | -                | gloB              | hydroxyacylglutathione hydrolase               |
| i02_0232  | CDS  | 242180 | 242920 | +                | yafS              | hypothetical protein                           |
| i02_0233  | CDS  | 242917 | 243495 | -                | rnhA              | ribonuclease H                                 |
| i02_0234  | CDS  | 243440 | 244180 | +                | dnaQ              | DNA polymerase III subunit epsilon             |
| i02_0235  | CDS  | 244429 | 244773 | +                | /                 | hypothetical protein                           |
| i02_0236  | CDS  | 244921 | 245367 | -                | /                 | hypothetical protein                           |
| i02_0237  | CDS  | 245682 | 245903 | +                | /                 | hypothetical protein                           |
| i02_0238  | CDS  | 245973 | 246323 | +                | /                 | hypothetical protein                           |
| i02_0239  | CDS  | 246354 | 247001 | +                | /                 | hypothetical protein                           |
| i02_0240  | CDS  | 246952 | 247902 | +                | /                 | hypothetical protein                           |
| i02_0241  | CDS  | 248012 | 248950 | -                | /                 | hypothetical protein                           |
| i02_0242  | CDS  | 248922 | 249236 | -                | /                 | hypothetical protein                           |
| i02_0243  | CDS  | 249379 | 250323 | +                | /                 | putative integrase of prophage                 |
| i02_0244  | CDS  | 250486 | 250611 | -                | /                 | hypothetical protein                           |
| i02_0245  | CDS  | 250932 | 252122 | +                | /                 | hypothetical protein                           |
| i02_0246  | CDS  | 252142 | 252348 | +                | /                 | hypothetical protein                           |
| i02_0247  | CDS  | 252338 | 252574 | +                | /                 | hypothetical protein                           |
| i02_0248  | CDS  | 252567 | 252779 | +                | /                 | hypothetical protein                           |
| i02_0249  | CDS  | 252994 | 253293 | +                | /                 | hypothetical protein                           |
| i02_0250  | CDS  | 253290 | 254705 | +                | /                 | hypothetical protein                           |
| i02_0251  | CDS  | 254946 | 255158 | +                | /                 | hypothetical protein                           |
| i02_0252  | CDS  | 255155 | 255577 | +                | /                 | putative single stranded DNA-binding protein   |
| i02_0253  | CDS  | 255993 | 256199 | +                | /                 | hypothetical protein                           |
| i02_0254  | CDS  | 256199 | 257254 | +                | /                 | putative capsid protein of prophage            |
| i02_0255  | CDS  | 257266 | 257601 | +                | /                 | hypothetical protein                           |
| i02_0256  | CDS  | 257614 | 258027 | +                | /                 | hypothetical protein                           |
| i02_0257  | CDS  | 258100 | 258234 | +                | /                 | conserved hypothetical protein                 |
| i02_0258  | CDS  | 258234 | 258776 | +                | /                 | gp1                                            |
| i02_0259  | CDS  | 258850 | 259131 | +                | /                 | hypothetical protein                           |
| i02_0260  | CDS  | 259740 | 259994 | -                | /                 | hypothetical protein                           |
| i02_0261  | CDS  | 260058 | 260243 | +                | /                 | hypothetical protein                           |
| i02_0262  | CDS  | 260391 | 261077 | +                | /                 | putative transposase                           |
| i02_0263  | CDS  | 261125 | 261379 | +                | /                 | hypothetical protein                           |
| i02_0264  | CDS  | 261458 | 261805 | -                | /                 | hypothetical protein                           |
| i02_0265  | CDS  | 261947 | 262324 | -                | /                 | hypothetical protein                           |
| i02_0266  | CDS  | 262371 | 262826 | -                | /                 | hypothetical protein                           |
| i02_0267  | CDS  | 262795 | 263439 | -                | /                 | hypothetical protein                           |
| i02_0268  | CDS  | 263742 | 264218 | -                | yeeS              | putative radC-like protein YeeS                |
| i02_0269  | CDS  | 264234 | 264779 | -                | /                 | hypothetical protein                           |
| i02_0270  | CDS  | 264801 | 265025 | -                | /                 | hypothetical protein                           |
| i02_0271  | CDS  | 265046 | 265867 | -                | /                 | hypothetical protein                           |
| i02_0272  | CDS  | 265967 | 266200 | -                | /                 | hypothetical protein                           |
| i02_0273  | CDS  | 266318 | 266803 | -                | /                 | hypothetical protein                           |
| i02_0274  | CDS  | 266807 | 266926 | -                | /                 | hypothetical protein                           |
| i02_0275  | CDS  | 266926 | 267174 | -                | /                 | hypothetical protein                           |
| i02_0276  | CDS  | 267205 | 267843 | -                | /                 | hypothetical protein                           |
| i02_0277  | CDS  | 267890 | 268396 | -                | /                 | hypothetical protein                           |
| i02_0278  | CDS  | 268486 | 269556 | -                | /                 | hypothetical protein                           |
| i02_0279  | CDS  | 269553 | 270458 | -                | /                 | hypothetical protein                           |

| Locus_tag | Type | start  | End    | +/- <sup>a</sup> | Gene <sup>b</sup> | Product                                     |
|-----------|------|--------|--------|------------------|-------------------|---------------------------------------------|
| i02_0280  | CDS  | 270455 | 272851 | -                | /                 | hypothetical protein                        |
| i02_0281  | CDS  | 273069 | 273566 | -                | /                 | hypothetical protein                        |
| i02_0282  | CDS  | 273725 | 274828 | -                | /                 | hypothetical protein                        |
| i02_0283  | CDS  | 275218 | 275826 | +                | /                 | hypothetical protein                        |
| i02_0284  | CDS  | 276054 | 276791 | +                | /                 | conserved hypothetical protein              |
| i02_0285  | CDS  | 276909 | 277718 | -                | /                 | hypothetical protein                        |
| i02_0286  | CDS  | 278201 | 280366 | +                | /                 | TonB dependent receptor                     |
| i02_0287  | CDS  | 280374 | 281366 | +                | /                 | periplasmic binding protein                 |
| i02_0288  | CDS  | 281385 | 282443 | +                | /                 | ABC transporter                             |
| i02_0289  | CDS  | 282440 | 283207 | +                | /                 | putative ABC transporter                    |
| i02_0290  | CDS  | 284056 | 284424 | +                | /                 | hypothetical protein                        |
| i02_0291  | CDS  | 284069 | 284494 | +                | /                 | hypothetical protein                        |
| i02_0292  | CDS  | 285026 | 285211 | +                | /                 | hypothetical protein                        |
| i02_0293  | CDS  | 285312 | 285449 | +                | /                 | hypothetical protein                        |
| i02_0294  | CDS  | 285358 | 285501 | -                | /                 | hypothetical protein                        |
| i02_0295  | CDS  | 285948 | 286148 | +                | /                 | hypothetical protein                        |
| i02_0296  | CDS  | 286051 | 286659 | -                | /                 | hypothetical protein                        |
| i02_0297  | CDS  | 287337 | 288128 | -                | /                 | hypothetical protein                        |
| i02_0298  | CDS  | 289203 | 289343 | +                | /                 | hemolysin expression modulating protein     |
| i02_0299  | CDS  | 289575 | 290174 | +                | /                 | hypothetical protein                        |
| i02_0300  | CDS  | 290540 | 290929 | +                | /                 | hypothetical protein                        |
| i02_0301  | CDS  | 290926 | 291351 | +                | /                 | hypothetical protein                        |
| i02_0302  | CDS  | 291553 | 291795 | +                | /                 | hypothetical protein                        |
| i02_0303  | CDS  | 291823 | 292389 | +                | /                 | hypothetical protein                        |
| i02_0304  | CDS  | 292442 | 292597 | +                | /                 | hypothetical protein                        |
| i02_0305  | CDS  | 292494 | 292709 | +                | /                 | hypothetical protein                        |
| i02_0306  | CDS  | 292615 | 292905 | -                | /                 | hypothetical protein                        |
| i02_0307  | CDS  | 293294 | 293932 | -                | /                 | hypothetical protein                        |
| i02_0308  | CDS  | 294201 | 295373 | +                | /                 | putative oligogalacturonide lyase           |
| i02_0309  | CDS  | 295403 | 296203 | +                | /                 | gluconate 5-dehydrogenase                   |
| i02_0310  | CDS  | 296947 | 298461 | +                | /                 | putative oligogalacturonide transporter     |
| i02_0311  | CDS  | 298391 | 300697 | +                | /                 | putative exopolysaccharon lyase             |
| i02_0313  | CDS  | 300790 | 301770 | +                | /                 | hypothetical protein                        |
| i02_0314  | CDS  | 302090 | 302518 | -                | /                 | hypothetical protein                        |
| i02_0315  | CDS  | 302861 | 303331 | -                | /                 | hypothetical protein                        |
| i02_0316  | CDS  | 303837 | 304076 | -                | /                 | hypothetical protein                        |
| i02_0317  | CDS  | 304206 | 304331 | +                | /                 | hypothetical protein                        |
| i02_0318  | CDS  | 304858 | 305643 | -                | /                 | putative deoxyribose operon repressor       |
| i02_0319  | CDS  | 305946 | 306866 | +                | /                 | putative ribokinase                         |
| i02_0320  | CDS  | 306894 | 308210 | +                | /                 | putative L-fucose permease                  |
| i02_0321  | CDS  | 308222 | 309235 | +                | /                 | putative cytoplasmic protein                |
| i02_0322  | CDS  | 310158 | 311414 | -                | ulaA              | ascorbate-specific PTS system enzyme IIC    |
| i02_0323  | CDS  | 311427 | 311714 | -                | /                 | hypothetical protein                        |
| i02_0324  | CDS  | 311730 | 312173 | -                | /                 | PTS system, mannitol (Cryptic)-specific IIA |
| i02_0325  | CDS  | 312444 | 313475 | +                | /                 | hypothetical protein                        |
| i02_0326  | CDS  | 313762 | 313893 | -                | /                 | hypothetical protein                        |
| i02_0327  | CDS  | 313978 | 314130 | -                | /                 | hypothetical protein                        |
| i02_0328  | CDS  | 314194 | 314853 | +                | /                 | hypothetical protein                        |
| i02_0329  | CDS  | 314844 | 315032 | -                | /                 | hypothetical protein                        |
| i02_0330  | CDS  | 316536 | 316847 | +                | /                 | hypothetical protein                        |
| i02_0331  | CDS  | 316860 | 326510 | +                | /                 | ShIA/HecA/FhaA exofamily protein            |
| i02_0332  | CDS  | 328295 | 329419 | +                | /                 | transposase                                 |
| i02_0333  | CDS  | 329903 | 330175 | -                | /                 | PefB protein                                |
| i02_0334  | CDS  | 330422 | 334537 | -                | /                 | Pic serine protease precursor               |
| i02_0335  | CDS  | 334604 | 334765 | +                | /                 | hypothetical protein                        |
| i02_0336  | CDS  | 337392 | 337775 | +                | /                 | hypothetical protein                        |
| i02_0337  | CDS  | 337772 | 338251 | +                | /                 | hypothetical protein                        |
| i02_0339  | CDS  | 338958 | 340193 | +                | /                 | hypothetical protein                        |

| Locus_tag | Type   | start  | End    | +/- <sup>a</sup> | Gene <sup>b</sup> | Product                                      |
|-----------|--------|--------|--------|------------------|-------------------|----------------------------------------------|
| i02_0340  | CDS    | 340218 | 342365 | +                | /                 | putative cytoplasmic membrane export protein |
| i02_0341  | CDS    | 342411 | 343673 | +                | /                 | putative membrane spanning export protein    |
| i02_0342  | CDS    | 343872 | 347699 | +                | /                 | RTX family exoprotein A gene                 |
| i02_0343  | CDS    | 347820 | 347939 | +                | /                 | hypothetical protein                         |
| i02_0344  | CDS    | 348302 | 348832 | +                | /                 | hypothetical protein                         |
| i02_0345  | CDS    | 348783 | 349052 | -                | /                 | hypothetical protein                         |
| i02_0346  | CDS    | 349193 | 349669 | -                | /                 | hypothetical protein                         |
| i02_0347  | CDS    | 349736 | 349945 | +                | /                 | hypothetical protein                         |
| i02_0348  | CDS    | 350047 | 350247 | +                | /                 | hypothetical protein                         |
| i02_0349  | CDS    | 350519 | 351298 | -                | yafV              | hypothetical protein                         |
| i02_0350  | CDS    | 351443 | 351916 | +                | ykfE              | C-lysozyme inhibitor                         |
| i02_0351  | CDS    | 351959 | 354403 | -                | fadE              | acyl-CoA dehydrogenase                       |
| i02_0352  | CDS    | 354481 | 355221 | +                | gmhA              | phosphoheptose isomerase                     |
| i02_0353  | CDS    | 355411 | 356193 | +                | yafJ              | hypothetical protein                         |
| i02_0354  | CDS    | 356164 | 356904 | -                | yafK              | hypothetical protein                         |
| i02_0355  | CDS    | 357207 | 357965 | +                | yafL              | lipoprotein yafL precursor                   |
| i02_0356  | CDS    | 358240 | 359979 | -                | fhiA              | FhiA protein                                 |
| i02_0357  | CDS    | 359921 | 360709 | +                | mbhA              | hypothetical protein                         |
| i02_0358  | CDS    | 360780 | 361835 | +                | dinP              | DNA polymerase IV                            |
| i02_0359  | CDS    | 361832 | 362284 | +                | yafP              | hypothetical protein                         |
| i02_0360  | CDS    | 362462 | 363613 | +                | /                 | hypothetical protein                         |
| i02_0361  | CDS    | 363526 | 364224 | +                | prfH              | peptide chain release factor-like protein    |
| i02_0362  | CDS    | 364281 | 365738 | -                | pepD              | aminoacyl-histidine dipeptidase              |
| i02_0363  | CDS    | 365999 | 366457 | +                | gpt               | xanthine-guanine phosphoribosyltransferase   |
| i02_0364  | CDS    | 366131 | 366583 | -                | /                 | hypothetical protein                         |
| i02_0365  | CDS    | 366549 | 367793 | +                | frsA              | fermentation/respiration switch protein      |
| i02_0366  | CDS    | 367851 | 368252 | +                | crl               | DNA-binding transcriptional regulator Crl    |
| i02_0367  | CDS    | 368291 | 369352 | -                | phoE              | outer membrane phosphoprotein                |
| i02_0368  | CDS    | 369635 | 370738 | +                | proB              | gamma-glutamyl kinase                        |
| i02_0369  | CDS    | 370750 | 372003 | +                | proA              | gamma-glutamyl phosphate reductase           |
| i02_0370  | CDS    | 372348 | 372686 | +                | /                 | CP4-like integrase                           |
| i02_0371  | CDS    | 373121 | 373645 | -                | /                 | hypothetical protein                         |
| i02_0372  | pseudo | 373771 | 377903 | -                | /                 | vacuolating autotransporter toxin            |
| i02_0373  | CDS    | 378216 | 378413 | +                | /                 | hypothetical protein                         |
| i02_0374  | CDS    | 378331 | 378456 | +                | /                 | hypothetical protein                         |
| i02_0375  | CDS    | 378496 | 378711 | +                | /                 | insertion element IS1 1/2/3/5/6 protein insA |
| i02_0376  | CDS    | 378902 | 379177 | -                | /                 | hypothetical protein                         |
| i02_0377  | CDS    | 379013 | 379189 | +                | /                 | InsB protein                                 |
| i02_0378  | CDS    | 379568 | 379750 | +                | /                 | hypothetical protein                         |
| i02_0379  | CDS    | 380013 | 380627 | +                | yagU              | hypothetical protein                         |
| i02_0380  | CDS    | 380876 | 381205 | -                | ykgJ              | putative ferredoxin                          |
| i02_0381  | CDS    | 381512 | 382267 | -                | yagV              | hypothetical protein                         |
| i02_0382  | CDS    | 382191 | 383834 | -                | yagW              | hypothetical protein                         |
| i02_0383  | CDS    | 383824 | 386349 | -                | yagX              | hypothetical protein                         |
| i02_0384  | CDS    | 386375 | 387091 | -                | yagY              | hypothetical protein                         |
| i02_0385  | CDS    | 387100 | 387687 | -                | matB              | hypothetical protein                         |
| i02_0386  | CDS    | 387762 | 388352 | -                | matA              | hypothetical protein                         |
| i02_0387  | CDS    | 388776 | 389066 | +                | /                 | hypothetical protein                         |
| i02_0388  | CDS    | 389388 | 389531 | -                | rpmJ              | 50S ribosomal protein L36                    |
| i02_0389  | CDS    | 389528 | 389794 | -                | rpmE2             | 50S ribosomal protein L31 type B             |
| i02_0390  | CDS    | 389832 | 389963 | +                | /                 | hypothetical protein                         |
| i02_0391  | CDS    | 390730 | 391872 | -                | /                 | putative oxidoreductase                      |
| i02_0392  | CDS    | 392044 | 392964 | -                | /                 | hypothetical protein                         |
| i02_0393  | CDS    | 393058 | 394047 | +                | /                 | LysR family transcriptional regulator        |
| i02_0394  | CDS    | 394172 | 395140 | +                | /                 | putative transcriptional regulator YcjZ      |
| i02_0395  | CDS    | 395171 | 396160 | -                | /                 | putative aldo/keto reductase                 |
| i02_0396  | CDS    | 396187 | 397038 | -                | /                 | 2,5-diketo-D-gluconic acid reductase A       |
| i02_0397  | CDS    | 397604 | 401854 | +                | eehH              | putative adhesin                             |

| Locus_tag | Type | start  | End    | +/- <sup>a</sup> | Gene <sup>b</sup> | Product                                         |
|-----------|------|--------|--------|------------------|-------------------|-------------------------------------------------|
| i02_0398  | CDS  | 401979 | 402869 | -                | ykgA              | putative transcriptional regulator YkgA         |
| i02_0399  | CDS  | 403069 | 403953 | +                | /                 | 2,5-diketo-D-gluconic acid reductase A          |
| i02_0400  | CDS  | 404113 | 404715 | -                | ykgB              | hypothetical protein                            |
| i02_0401  | CDS  | 404718 | 404969 | -                | ykgI              | hypothetical protein                            |
| i02_0402  | CDS  | 405063 | 406415 | -                | ykgC              | pyridine nucleotide-disulfide oxidoreductase    |
| i02_0403  | CDS  | 406564 | 407469 | +                | ykgD              | putative transcriptional regulator YkgD         |
| i02_0404  | CDS  | 408016 | 408714 | +                | ykgE              | hypothetical protein                            |
| i02_0405  | CDS  | 408725 | 410152 | +                | ykgF              | putative electron transport protein ykgF        |
| i02_0407  | CDS  | 409992 | 410840 | +                | ykgG              | hypothetical protein                            |
| i02_0408  | CDS  | 411083 | 411751 | -                | ykgH              | hypothetical protein                            |
| i02_0409  | CDS  | 411935 | 414265 | -                | /                 | hypothetical protein                            |
| i02_0410  | CDS  | 414274 | 415035 | -                | /                 | hypothetical protein                            |
| i02_0411  | CDS  | 415052 | 415192 | -                | /                 | hypothetical protein                            |
| i02_0412  | CDS  | 415189 | 415983 | -                | /                 | hypothetical protein                            |
| i02_0413  | CDS  | 415865 | 416020 | -                | /                 | hypothetical protein                            |
| i02_0414  | CDS  | 416042 | 416644 | -                | /                 | Type 1 fimbriae regulatory protein fimB         |
| i02_0415  | CDS  | 417367 | 417648 | +                | /                 | hypothetical protein                            |
| i02_0416  | CDS  | 417690 | 419360 | -                | betA              | choline dehydrogenase                           |
| i02_0417  | CDS  | 419374 | 420849 | -                | betB              | betaine aldehyde dehydrogenase                  |
| i02_0418  | CDS  | 420860 | 421465 | -                | betI              | transcriptional regulator BetI                  |
| i02_0419  | CDS  | 421576 | 423609 | +                | betT              | choline transport protein BetT                  |
| i02_0420  | CDS  | 424479 | 425573 | +                | /                 | hypothetical protein                            |
| i02_0421  | CDS  | 425615 | 426547 | -                | yahB              | putative transcriptional regulator YahB         |
| i02_0422  | CDS  | 426639 | 427136 | -                | yahC              | hypothetical protein                            |
| i02_0423  | CDS  | 427213 | 427455 | +                | /                 | hypothetical protein                            |
| i02_0424  | CDS  | 427394 | 427999 | +                | yahD              | ankyrin repeat-containing protein               |
| i02_0425  | CDS  | 428039 | 428902 | +                | yahE              | hypothetical protein                            |
| i02_0426  | CDS  | 428892 | 430439 | +                | /                 | hypothetical protein                            |
| i02_0427  | CDS  | 430439 | 431857 | +                | /                 | hypothetical protein                            |
| i02_0428  | CDS  | 432187 | 433137 | +                | /                 | putative carbamate kinase                       |
| i02_0429  | CDS  | 433147 | 434529 | +                | yahJ              | deaminase                                       |
| i02_0430  | CDS  | 434751 | 434885 | -                | /                 | hypothetical protein                            |
| i02_0431  | CDS  | 434906 | 435955 | +                | yahK              | hypothetical protein                            |
| i02_0432  | CDS  | 436837 | 437511 | -                | yahN              | hypothetical protein                            |
| i02_0433  | CDS  | 437658 | 437933 | +                | yahO              | hypothetical protein                            |
| i02_0434  | CDS  | 438034 | 439620 | -                | prpR              | propionate catabolism operon regulatory protein |
| i02_0435  | CDS  | 439859 | 440749 | +                | prpB              | 2-methylisocitrate lyase                        |
| i02_0436  | CDS  | 440909 | 442078 | +                | prpC              | methylcitrate synthase                          |
| i02_0437  | CDS  | 442112 | 443563 | +                | prpD              | 2-methylcitrate dehydratase                     |
| i02_0438  | CDS  | 443603 | 445489 | +                | prpE              | propionyl-CoA synthetase                        |
| i02_0439  | CDS  | 445814 | 447073 | +                | codB              | cytosine permease                               |
| i02_0440  | CDS  | 447048 | 448346 | +                | codA              | cytosine deaminase                              |
| i02_0441  | CDS  | 448467 | 449129 | -                | lacA              | galactoside O-acetyltransferase                 |
| i02_0442  | CDS  | 449144 | 450397 | -                | lacY              | galactoside permease                            |
| i02_0443  | CDS  | 450449 | 453523 | -                | lacZ              | beta-D-galactosidase                            |
| i02_0444  | CDS  | 453646 | 454737 | -                | lacI              | lac repressor                                   |
| i02_0445  | CDS  | 454930 | 455469 | +                | yaiL              | hypothetical protein                            |
| i02_0446  | CDS  | 455697 | 456530 | -                | yaiM              | hypothetical protein                            |
| i02_0447  | CDS  | 456623 | 457732 | -                | adhC              | alcohol dehydrogenase class III                 |
| i02_0448  | CDS  | 457767 | 458063 | -                | yaiN              | regulator protein FrmR                          |
| i02_0449  | CDS  | 458229 | 459002 | -                | /                 | hypothetical protein                            |
| i02_0450  | CDS  | 459004 | 459714 | -                | /                 | putative transferase                            |
| i02_0451  | CDS  | 459563 | 460759 | -                | /                 | hypothetical protein                            |
| i02_0452  | CDS  | 460769 | 461455 | -                | /                 | hypothetical protein                            |
| i02_0453  | CDS  | 461900 | 462094 | -                | /                 | hypothetical protein                            |
| i02_0454  | CDS  | 461991 | 463010 | +                | tauA              | taurine transporter substrate binding subunit   |
| i02_0455  | CDS  | 463023 | 463790 | +                | tauB              | taurine transporter ATP-binding subunit         |
| i02_0457  | CDS  | 463787 | 464614 | +                | tauC              | taurine transporter subunit                     |



| <b>Locus_tag</b> | <b>Type</b> | <b>start</b> | <b>End</b> | <b>+/-<sup>a</sup></b> | <b>Gene<sup>b</sup></b> | <b>Product</b>                                  |
|------------------|-------------|--------------|------------|------------------------|-------------------------|-------------------------------------------------|
| i02_0458         | CDS         | 464611       | 465462     | +                      | tauD                    | taurine dioxygenase                             |
| i02_0459         | CDS         | 465502       | 466509     | -                      | hemB                    | delta-aminolevulinic acid dehydratase           |
| i02_0460         | CDS         | 467002       | 469989     | +                      | /                       | putative structural protein                     |
| i02_0461         | CDS         | 470030       | 470698     | +                      | yaiV                    | putative DNA-binding transcriptional regulator  |
| i02_0462         | CDS         | 470699       | 471856     | -                      | yaiH                    | beta-lactam binding protein AmpH                |
| i02_0463         | CDS         | 471994       | 472188     | +                      | /                       | hypothetical protein                            |
| i02_0464         | CDS         | 472202       | 473428     | +                      | sbmA                    | transport protein                               |
| i02_0465         | CDS         | 473441       | 474535     | +                      | yaiW                    | hypothetical protein                            |
| i02_0466         | CDS         | 474594       | 474902     | -                      | yaiY                    | hypothetical protein                            |
| i02_0467         | CDS         | 474832       | 474966     | +                      | /                       | hypothetical protein                            |
| i02_0468         | CDS         | 475030       | 475374     | +                      | yaiZ                    | hypothetical protein                            |
| i02_0469         | CDS         | 475398       | 476492     | -                      | ddl                     | D-alanyl-alanine synthetase A                   |
| i02_0470         | CDS         | 476570       | 476692     | +                      | /                       | hypothetical protein                            |
| i02_0471         | CDS         | 476955       | 477215     | +                      | yaiB                    | hypothetical protein                            |
| i02_0472         | CDS         | 477247       | 478731     | +                      | phoA                    | alkaline phosphatase                            |
| i02_0473         | CDS         | 478832       | 479170     | +                      | psiF                    | hypothetical protein                            |
| i02_0474         | CDS         | 479272       | 480387     | +                      | adrA                    | diguanylate cyclase AdrA                        |
| i02_0475         | CDS         | 480404       | 481213     | -                      | proC                    | pyrroline-5-carboxylate reductase               |
| i02_0476         | CDS         | 481333       | 481791     | +                      | yail                    | hypothetical protein                            |
| i02_0477         | CDS         | 481974       | 482498     | +                      | aroL                    | shikimate kinase II                             |
| i02_0479         | CDS         | 482548       | 482739     | +                      | yaiA                    | hypothetical protein                            |
| i02_0480         | CDS         | 482997       | 483674     | +                      | aroM                    | hypothetical protein                            |
| i02_0481         | CDS         | 483746       | 484030     | +                      | yaiE                    | hypothetical protein                            |
| i02_0482         | CDS         | 484134       | 484289     | -                      | /                       | hypothetical protein                            |
| i02_0483         | CDS         | 484238       | 484519     | +                      | ykiA                    | hypothetical protein                            |
| i02_0484         | CDS         | 484677       | 485588     | -                      | rdgC                    | recombination associated protein                |
| i02_0485         | CDS         | 485587       | 486621     | +                      | /                       | fructokinase                                    |
| i02_0486         | CDS         | 486890       | 488158     | -                      | araJ                    | MFS transport protein AraJ                      |
| i02_0487         | CDS         | 488200       | 491343     | -                      | sbcC                    | exonuclease subunit SbcC                        |
| i02_0488         | CDS         | 491340       | 492566     | -                      | sbcD                    | exonuclease subunit SbcD                        |
| i02_0489         | CDS         | 492528       | 492659     | +                      | /                       | hypothetical protein                            |
| i02_0490         | CDS         | 492732       | 493421     | +                      | phoB                    | transcriptional regulator PhoB                  |
| i02_0491         | CDS         | 493479       | 494774     | +                      | phoR                    | phosphate regulon sensor protein                |
| i02_0492         | CDS         | 494987       | 495136     | -                      | /                       | hypothetical protein                            |
| i02_0493         | CDS         | 495181       | 496500     | +                      | brnQ                    | branched chain amino acid ABC transporter       |
| i02_0494         | CDS         | 496573       | 497949     | +                      | proY                    | putative proline-specific permease              |
| i02_0495         | CDS         | 498105       | 499922     | +                      | malZ                    | maltodextrin glucosidase                        |
| i02_0496         | CDS         | 499927       | 500565     | -                      | yajB                    | acyl carrier protein phosphodiesterase          |
| i02_0497         | CDS         | 500727       | 501797     | +                      | queA                    | S-adenosylmethionine:tRNA                       |
| i02_0498         | CDS         | 501852       | 502979     | +                      | tgt                     | queueine tRNA-ribosyltransferase                |
| i02_0499         | CDS         | 503002       | 503334     | +                      | yajC                    | preprotein translocase subunit YajC             |
| i02_0500         | CDS         | 503362       | 505209     | +                      | secD                    | preprotein translocase subunit SecD             |
| i02_0501         | CDS         | 505175       | 506191     | +                      | secF                    | preprotein translocase subunit SecF             |
| i02_0502         | CDS         | 506252       | 506668     | +                      | yajD                    | hypothetical protein                            |
| i02_0503         | CDS         | 506706       | 507638     | -                      | tsx                     | nucleoside-specific channel-forming protein tsx |
| i02_0504         | CDS         | 507889       | 508488     | -                      | yajI                    | hypothetical protein                            |
| i02_0505         | CDS         | 508579       | 509028     | +                      | nrdR                    | transcriptional regulator NrdR                  |
| i02_0506         | CDS         | 509032       | 510135     | +                      | ribD                    | bifunctional                                    |
| i02_0507         | CDS         | 510128       | 510694     | +                      | ribH                    | 6,7-dimethyl-8-ribityllumazine synthase         |
| i02_0508         | CDS         | 510714       | 511133     | +                      | nusB                    | transcription antitermination protein NusB      |
| i02_0509         | CDS         | 511211       | 512188     | +                      | thiL                    | thiamine monophosphate kinase                   |
| i02_0510         | CDS         | 512166       | 512684     | +                      | pgpA                    | phosphatidylglycerophosphatase A                |
| i02_0511         | CDS         | 512738       | 513712     | -                      | yajO                    | oxidoreductase yajO                             |
| i02_0512         | CDS         | 513767       | 515629     | -                      | dxs                     | 1-deoxy-D-xylulose-5-phosphate synthase         |
| i02_0513         | CDS         | 515654       | 516553     | -                      | ispA                    | geranyltranstransferase                         |
| i02_0514         | CDS         | 516553       | 516795     | -                      | xseB                    | exodeoxyribonuclease VII small subunit          |
| i02_0515         | CDS         | 517001       | 518449     | +                      | yajK                    | thiamine biosynthesis protein ThiI              |
| i02_0516         | CDS         | 518503       | 519099     | -                      | thiJ                    | hypothetical protein                            |

| Locus_tag | Type | start  | End    | +/- <sup>a</sup> | Gene <sup>b</sup> | Product                                         |
|-----------|------|--------|--------|------------------|-------------------|-------------------------------------------------|
| i02_0517  | CDS  | 519056 | 519967 | -                | apbA              | 2-dehydropantoate 2-reductase                   |
| i02_0518  | CDS  | 520117 | 520626 | +                | yajQ              | putative nucleotide-binding protein             |
| i02_0519  | CDS  | 520754 | 522316 | -                | yajR              | putative transport protein YajR                 |
| i02_0520  | CDS  | 522267 | 523202 | -                | cyoE              | protoheme IX farnesyltransferase                |
| i02_0521  | CDS  | 523169 | 523579 | -                | cyoD              | cytochrome o ubiquinol oxidase subunit IV       |
| i02_0522  | CDS  | 523498 | 524112 | -                | cyoC              | cytochrome o ubiquinol oxidase subunit III      |
| i02_0523  | CDS  | 524102 | 526093 | -                | cyoB              | cytochrome o ubiquinol oxidase subunit I        |
| i02_0524  | CDS  | 526115 | 527062 | -                | cyoA              | cytochrome o ubiquinol oxidase subunit II       |
| i02_0525  | CDS  | 527521 | 528996 | -                | ampG              | muropeptide transporter                         |
| i02_0526  | CDS  | 529040 | 529720 | -                | yajG              | hypothetical protein                            |
| i02_0527  | CDS  | 529668 | 529799 | -                | /                 | hypothetical protein                            |
| i02_0528  | CDS  | 529923 | 530240 | +                | bolA              | transcriptional regulator BolA                  |
| i02_0529  | CDS  | 530249 | 530437 | +                | /                 | hypothetical protein                            |
| i02_0530  | CDS  | 530584 | 531882 | +                | tig               | trigger factor                                  |
| i02_0531  | CDS  | 532128 | 532751 | +                | clpP              | ATP-dependent Clp protease proteolytic subunit  |
| i02_0532  | CDS  | 532877 | 534151 | +                | clpX              | ATP-dependent protease ATP-binding subunit ClpX |
| i02_0533  | CDS  | 534294 | 536693 | +                | lon               | DNA-binding ATP-dependent protease La           |
| i02_0534  | CDS  | 536902 | 537174 | +                | hupB              | transcriptional regulator HU subunit beta       |
| i02_0535  | CDS  | 537366 | 539237 | +                | ybaU              | peptidyl-prolyl cis-trans isomerase (rotamase)  |
| i02_0536  | CDS  | 539388 | 539759 | +                | ybaV              | hypothetical protein                            |
| i02_0537  | CDS  | 539865 | 540263 | +                | ybaW              | hypothetical protein                            |
| i02_0538  | CDS  | 540315 | 541010 | -                | ybaX              | queuosine biosynthesis protein QueC             |
| i02_0539  | CDS  | 541075 | 542790 | -                | ybaE              | hypothetical protein                            |
| i02_0540  | CDS  | 542863 | 543693 | +                | cof               | Cof protein                                     |
| i02_0541  | CDS  | 543696 | 544304 | +                | ybaO              | putative transcriptional regulator YbaO         |
| i02_0542  | CDS  | 544334 | 546106 | +                | mdlA              | putative multidrug transporter                  |
| i02_0543  | CDS  | 546099 | 547880 | +                | mdlB              | putative multidrug transporter                  |
| i02_0544  | CDS  | 547923 | 548399 | +                | glnK              | nitrogen regulatory protein P-II 2              |
| i02_0546  | CDS  | 548429 | 549715 | +                | amtB              | ammonium transporter                            |
| i02_0547  | CDS  | 549764 | 550708 | -                | tesB              | acyl-CoA thioesterase II                        |
| i02_0548  | CDS  | 550703 | 550825 | +                | /                 | hypothetical protein                            |
| i02_0549  | CDS  | 550842 | 551414 | +                | ybaY              | hypothetical protein                            |
| i02_0550  | CDS  | 551445 | 551855 | -                | ybaZ              | hypothetical protein                            |
| i02_0551  | CDS  | 552135 | 552488 | +                | ybaA              | hypothetical protein                            |
| i02_0552  | CDS  | 552530 | 554086 | -                | ylaB              | hypothetical protein                            |
| i02_0553  | CDS  | 554244 | 554753 | -                | ylaC              | hypothetical protein                            |
| i02_0554  | CDS  | 554830 | 555381 | -                | ylaD              | maltose O-acetyltransferase                     |
| i02_0555  | CDS  | 555554 | 555973 | -                | hha               | hemolysin expression-modulating protein         |
| i02_0556  | CDS  | 555798 | 556172 | -                | ybaJ              | hypothetical protein                            |
| i02_0557  | CDS  | 556717 | 559866 | -                | acrB              | acriflavin resistance protein B                 |
| i02_0558  | CDS  | 559889 | 561118 | -                | acrA              | acriflavin resistance protein A                 |
| i02_0559  | CDS  | 561224 | 561871 | +                | acrR              | DNA-binding transcriptional repressor AcrR      |
| i02_0560  | CDS  | 561999 | 565361 | +                | aefA              | potassium efflux protein KefA                   |
| i02_0561  | CDS  | 565573 | 565734 | -                | ybaM              | hypothetical protein                            |
| i02_0562  | CDS  | 565748 | 566275 | -                | priC              | primosomal replication protein N''              |
| i02_0563  | CDS  | 566345 | 566722 | +                | ybaN              | hypothetical protein                            |
| i02_0564  | CDS  | 566821 | 567426 | +                | apt               | adenine phosphoribosyltransferase               |
| i02_0565  | CDS  | 567555 | 569486 | +                | dnaX              | DNA polymerase III subunits gamma and tau       |
| i02_0566  | CDS  | 569530 | 569868 | +                | ybaB              | hypothetical protein                            |
| i02_0567  | CDS  | 569868 | 570473 | +                | recR              | recombination protein RecR                      |
| i02_0568  | CDS  | 570583 | 572457 | +                | htpG              | heat shock protein 90                           |
| i02_0569  | CDS  | 572638 | 573282 | +                | adk               | adenylate kinase                                |
| i02_0570  | CDS  | 573414 | 574376 | +                | hemH              | ferrochelataase                                 |
| i02_0571  | CDS  | 574373 | 575332 | -                | ybaC              | acetyl esterase                                 |
| i02_0572  | CDS  | 575484 | 576788 | +                | gsk               | inosine-guanosine kinase                        |
| i02_0573  | CDS  | 576918 | 578594 | -                | ybaL              | putative cation:proton antiport protein         |
| i02_0574  | CDS  | 578832 | 580052 | -                | fsr               | fosmidomycin resistance protein                 |

| <b>Locus_tag</b> | <b>Type</b> | <b>start</b> | <b>End</b> | <b>+/-<sup>a</sup></b> | <b>Gene<sup>b</sup></b> | <b>Product</b>                                                  |
|------------------|-------------|--------------|------------|------------------------|-------------------------|-----------------------------------------------------------------|
| i02_0575         | CDS         | 580270       | 581922     | +                      | ushA                    | bifunctional UDP-sugar hydrolase/5'-nucleotidase                |
| i02_0576         | CDS         | 581959       | 582438     | -                      | ybaK                    | hypothetical protein                                            |
| i02_0577         | CDS         | 582642       | 583436     | -                      | ybaP                    | hypothetical protein                                            |
| i02_0578         | CDS         | 583685       | 583870     | +                      | /                       | hypothetical protein                                            |
| i02_0579         | CDS         | 583906       | 584247     | +                      | ybaQ                    | hypothetical protein                                            |
| i02_0580         | CDS         | 584305       | 586809     | -                      | copA                    | copper exporting ATPase                                         |
| i02_0581         | CDS         | 587072       | 588004     | +                      | ybaS                    | glutaminase                                                     |
| i02_0582         | CDS         | 588007       | 589299     | +                      | ybaT                    | putative transport protein YbaT                                 |
| i02_0583         | CDS         | 589424       | 589831     | +                      | ybbI                    | DNA-binding transcriptional regulator CueR                      |
| i02_0584         | CDS         | 589832       | 591055     | -                      | /                       | hypothetical protein                                            |
| i02_0585         | CDS         | 591174       | 591632     | -                      | ybbJ                    | hypothetical protein                                            |
| i02_0586         | CDS         | 591629       | 592546     | -                      | ybbK                    | hypothetical protein                                            |
| i02_0587         | CDS         | 592689       | 593369     | +                      | ybbL                    | putative ABC transporter ATP-binding protein                    |
| i02_0588         | CDS         | 593329       | 594135     | +                      | ybbM                    | putative metal resistance protein                               |
| i02_0589         | CDS         | 594198       | 595088     | -                      | ybbN                    | hypothetical protein                                            |
| i02_0590         | CDS         | 595113       | 595922     | -                      | ybbO                    | short chain dehydrogenase                                       |
| i02_0591         | CDS         | 595912       | 596568     | -                      | tesA                    | multifunctional acyl-CoA thioesterase                           |
| i02_0592         | CDS         | 596506       | 597192     | +                      | ybbA                    | putative ABC transporter ATP-binding protein                    |
| i02_0593         | CDS         | 597189       | 599603     | +                      | ybbP                    | hypothetical protein                                            |
| i02_0594         | CDS         | 599744       | 600838     | -                      | ybbB                    | tRNA 2-selenouridine synthase                                   |
| i02_0595         | CDS         | 600907       | 601833     | -                      | ybbS                    | DNA-binding transcriptional activator AII5                      |
| i02_0596         | CDS         | 602063       | 602545     | +                      | ybbT                    | ureidoglycolate hydrolase                                       |
| i02_0597         | CDS         | 602623       | 603438     | +                      | ybbU                    | DNA-binding transcriptional repressor AII8                      |
| i02_0598         | CDS         | 603438       | 605309     | +                      | gcl                     | glyoxylate carbonylase                                          |
| i02_0599         | CDS         | 605322       | 606098     | +                      | gip                     | hydroxypyruvate isomerase                                       |
| i02_0600         | CDS         | 606198       | 607076     | +                      | ybbQ                    | 2-hydroxy-3-oxopropionate reductase                             |
| i02_0601         | CDS         | 607246       | 608700     | +                      | ybbW                    | allantoin permease                                              |
| i02_0602         | CDS         | 608760       | 610121     | +                      | ybbX                    | allantoinase                                                    |
| i02_0603         | CDS         | 610171       | 611478     | +                      | ybbY                    | putative purine permease YbbY                                   |
| i02_0604         | CDS         | 611494       | 612645     | +                      | ybbZ                    | glycerate kinase II                                             |
| i02_0605         | CDS         | 612774       | 613559     | -                      | ylbA                    | hypothetical protein                                            |
| i02_0606         | CDS         | 613570       | 614823     | -                      | ylbB                    | allantoate amidohydrolase                                       |
| i02_0607         | CDS         | 614827       | 615876     | -                      | /                       | ureidoglycolate dehydrogenase                                   |
| i02_0608         | CDS         | 616193       | 617860     | +                      | fdxA                    | membrane protein FdrA                                           |
| i02_0609         | CDS         | 617870       | 619129     | +                      | ylbE                    | hypothetical protein                                            |
| i02_0610         | CDS         | 619047       | 619955     | +                      | ylbF                    | hypothetical protein                                            |
| i02_0611         | CDS         | 619952       | 620845     | +                      | arcC                    | carbamate kinase                                                |
| i02_0612         | CDS         | 620978       | 622045     | -                      | purK                    | phosphoribosylaminoimidazole carboxylase ATPase subunit         |
| i02_0613         | CDS         | 622042       | 622578     | -                      | purE                    | phosphoribosylaminoimidazole carboxylase                        |
| i02_0614         | CDS         | 622647       | 622976     | -                      | /                       | hypothetical protein                                            |
| i02_0615         | CDS         | 623087       | 623809     | -                      | ybbF                    | UDP-2,3-diacetylglucosamine hydrolase                           |
| i02_0616         | CDS         | 623812       | 624306     | -                      | ppiB                    | peptidyl-prolyl cis-trans isomerase B                           |
| i02_0617         | CDS         | 624480       | 625865     | +                      | cysS                    | cysteinyI-tRNA synthetase                                       |
| i02_0618         | pseudo      | 625901       | 626422     | -                      | ybcI                    | conserved hypothetical protein; putative inner membrane protein |
| i02_0619         | CDS         | 626530       | 626742     | -                      | ybcJ                    | hypothetical protein                                            |
| i02_0620         | CDS         | 626744       | 627610     | -                      | folD                    | bifunctional 5,10-methylene-tetrahydrofolate                    |
| i02_0621         | CDS         | 627651       | 627848     | +                      | /                       | hypothetical protein                                            |
| i02_0622         | CDS         | 627965       | 628345     | -                      | intD                    | prophage DLP12 integrase                                        |
| i02_0623         | CDS         | 628293       | 628700     | -                      | intD                    | prophage DLP12 integrase                                        |
| i02_0624         | CDS         | 628599       | 628955     | +                      | ydfM                    | tail fiber assembly protein                                     |
| i02_0625         | CDS         | 629010       | 629675     | -                      | /                       | hypothetical protein                                            |
| i02_0626         | CDS         | 629910       | 630863     | -                      | ompT                    | outer membrane protease                                         |
| i02_0627         | CDS         | 631522       | 632412     | -                      | ybcH                    | hypothetical protein                                            |
| i02_0628         | CDS         | 632413       | 635406     | -                      | nfrA                    | bacteriophage N4 receptor, outer membrane                       |
| i02_0629         | CDS         | 635372       | 637609     | -                      | nfrB                    | bacteriophage N4 adsorption protein B                           |
| i02_0630         | CDS         | 637759       | 639201     | -                      | cusS                    | sensor kinase CusS                                              |

| <b>Locus_tag</b> | <b>Type</b> | <b>start</b> | <b>End</b> | <b>+/-<sup>a</sup></b> | <b>Gene<sup>b</sup></b> | <b>Product</b>                                             |
|------------------|-------------|--------------|------------|------------------------|-------------------------|------------------------------------------------------------|
| i02_0631         | CDS         | 639191       | 639874     | -                      | cusR                    | DNA-binding transcriptional activator CusR                 |
| i02_0632         | CDS         | 640031       | 641413     | +                      | cusC                    | copper/silver efflux system outer membrane                 |
| i02_0633         | CDS         | 641437       | 641769     | +                      | cusX                    | periplasmic copper-binding protein                         |
| i02_0634         | CDS         | 641785       | 643008     | +                      | cusB                    | copper/silver efflux system membrane fusion                |
| i02_0635         | CDS         | 643020       | 646163     | +                      | cusA                    | putative cation efflux system protein cusA                 |
| i02_0636         | CDS         | 646229       | 647647     | +                      | pheP                    | phenylalanine transporter                                  |
| i02_0637         | CDS         | 647804       | 649051     | -                      | ybdG                    | hypothetical protein                                       |
| i02_0638         | CDS         | 649159       | 649812     | -                      | nfnB                    | dihydropteridine reductase                                 |
| i02_0639         | CDS         | 649891       | 650274     | -                      | ybdF                    | hypothetical protein                                       |
| i02_0640         | CDS         | 650339       | 650587     | -                      | ybdJ                    | hypothetical protein                                       |
| i02_0641         | CDS         | 650653       | 651771     | -                      | ybdK                    | carboxylate-amine ligase                                   |
| i02_0642         | CDS         | 651985       | 652254     | -                      | /                       | hypothetical protein                                       |
| i02_0643         | CDS         | 652497       | 653267     | -                      | entD                    | phosphopantetheinyltransferase                             |
| i02_0644         | CDS         | 653292       | 655532     | -                      | fepA                    | outer membrane receptor FepA                               |
| i02_0645         | CDS         | 655525       | 655656     | +                      | /                       | hypothetical protein                                       |
| i02_0646         | CDS         | 655775       | 656977     | +                      | fes                     | enterobactin/ferric enterobactin esterase                  |
| i02_0647         | CDS         | 657057       | 661076     | +                      | entF                    | enterobactin synthase subunit F                            |
| i02_0648         | CDS         | 661323       | 662456     | +                      | fepE                    | ferric enterobactin transport protein FepE                 |
| i02_0649         | CDS         | 662453       | 663586     | -                      | fepC                    | iron-enterobactin transporter ATP-binding component        |
| i02_0650         | CDS         | 663265       | 664257     | -                      | fepG                    | iron-enterobactin transporter permease                     |
| i02_0651         | CDS         | 664254       | 665270     | -                      | fepD                    | iron-enterobactin transporter membrane protein             |
| i02_0652         | CDS         | 665369       | 666619     | +                      | ybdA                    | enterobactin exporter EntS                                 |
| i02_0653         | CDS         | 666623       | 667579     | -                      | fepB                    | iron-enterobactin transporter periplasmic                  |
| i02_0654         | CDS         | 667756       | 668943     | +                      | entC                    | isochorismate synthase                                     |
| i02_0655         | CDS         | 668953       | 670563     | +                      | entE                    | enterobactin synthase subunit E                            |
| i02_0656         | CDS         | 670577       | 671434     | +                      | entB                    | isochorismatase                                            |
| i02_0657         | CDS         | 671404       | 672180     | +                      | entA                    | 2,3-dihydroxybenzoate-2,3-dehydrogenase                    |
| i02_0658         | CDS         | 672183       | 672596     | +                      | ybdB                    | hypothetical protein                                       |
| i02_0659         | CDS         | 672777       | 674882     | +                      | cstA                    | carbon starvation protein A                                |
| i02_0660         | CDS         | 674995       | 675192     | +                      | /                       | hypothetical protein                                       |
| i02_0661         | CDS         | 675202       | 676290     | -                      | ybdH                    | hypothetical protein                                       |
| i02_0662         | CDS         | 676369       | 677559     | +                      | ybdL                    | putative aminotransferase                                  |
| i02_0663         | CDS         | 677560       | 678189     | -                      | /                       | hypothetical protein                                       |
| i02_0664         | CDS         | 678162       | 679382     | -                      | /                       | hypothetical protein                                       |
| i02_0665         | CDS         | 679529       | 680467     | -                      | ybdO                    | putative transcriptional regulator YbdO                    |
| i02_0666         | CDS         | 680636       | 681442     | -                      | dsbG                    | disulfide isomerase/thiol-disulfide oxidase                |
| i02_0667         | CDS         | 681754       | 682317     | +                      | ahpC                    | alkyl hydroperoxide reductase subunit C                    |
| i02_0668         | CDS         | 682458       | 684053     | +                      | ahpF                    | Alkyl hydroperoxide reductase subunit F                    |
| i02_0669         | CDS         | 684174       | 684635     | -                      | ybdQ                    | hypothetical protein                                       |
| i02_0670         | CDS         | 684959       | 685369     | -                      | rnk                     | nucleoside diphosphate kinase regulator                    |
| i02_0671         | CDS         | 685599       | 686423     | -                      | rna                     | ribonuclease I                                             |
| i02_0672         | CDS         | 686519       | 687982     | -                      | ybdS                    | citrate transporter                                        |
| i02_0673         | CDS         | 688033       | 688911     | -                      | citG                    | triphosphoribosyl-dephospho-CoA synthase                   |
| i02_0674         | CDS         | 688886       | 689437     | -                      | citX                    | apo-citrate lyase phosphoribosyl-dephospho-CoA transferase |
| i02_0675         | CDS         | 689441       | 691012     | -                      | citF                    | citrate lyase alpha chain                                  |
| i02_0676         | CDS         | 690984       | 691907     | -                      | citE                    | citrate lyase beta chain                                   |
| i02_0677         | CDS         | 692200       | 693345     | -                      | citC                    | [citrate [pro-3S]-lyase] ligase                            |
| i02_0678         | CDS         | 693578       | 695296     | +                      | citA                    | sensor kinase dpiB                                         |
| i02_0679         | CDS         | 695265       | 695945     | +                      | dpiA                    | two-component response regulator DpiA                      |
| i02_0680         | CDS         | 695986       | 697371     | -                      | dcuC                    | C4-dicarboxylate transporter DcuC                          |
| i02_0681         | CDS         | 697958       | 698518     | +                      | pagP                    | palmitoyl transferase                                      |
| i02_0682         | CDS         | 698693       | 698902     | +                      | cspE                    | cold shock protein CspE                                    |
| i02_0683         | CDS         | 698956       | 699339     | -                      | ccrB                    | camphor resistance protein CrcB                            |
| i02_0684         | CDS         | 699426       | 700220     | +                      | ybeM                    | putative amidase                                           |
| i02_0685         | CDS         | 700349       | 700552     | +                      | tatE                    | twin arginine translocase protein E                        |
| i02_0686         | CDS         | 700652       | 701617     | -                      | lipA                    | lipoyl synthase                                            |

| Locus_tag | Type | start  | End    | +/- <sup>a</sup> | Gene <sup>b</sup> | Product                                                      |
|-----------|------|--------|--------|------------------|-------------------|--------------------------------------------------------------|
| i02_0687  | CDS  | 701849 | 702190 | -                | /                 | hypothetical protein                                         |
| i02_0688  | CDS  | 702437 | 703078 | -                | lipB              | lipoyltransferase                                            |
| i02_0689  | CDS  | 703179 | 703442 | -                | ybeD              | hypothetical protein                                         |
| i02_0690  | CDS  | 703552 | 704763 | -                | dacA              | D-alanyl-D-alanine carboxypeptidase fraction A               |
| i02_0691  | CDS  | 704801 | 704926 | +                | /                 | hypothetical protein                                         |
| i02_0692  | CDS  | 704903 | 705991 | -                | rlpA              | rare lipoprotein A                                           |
| i02_0693  | CDS  | 706002 | 707114 | -                | mrdB              | cell wall shape-determining protein                          |
| i02_0694  | CDS  | 707117 | 709018 | -                | mrdA              | penicillin-binding protein 2                                 |
| i02_0695  | CDS  | 709049 | 709516 | -                | ybeA              | rRNA large subunit methyltransferase                         |
| i02_0696  | CDS  | 709520 | 709837 | -                | ybeB              | hypothetical protein                                         |
| i02_0697  | CDS  | 709851 | 710141 | +                | /                 | hypothetical protein                                         |
| i02_0698  | CDS  | 710097 | 710711 | -                | phpB              | Alpha-ribazole-5'-phosphate phosphatase                      |
| i02_0699  | CDS  | 710732 | 711436 | -                | nadD              | nicotinic acid mononucleotide                                |
| i02_0700  | CDS  | 711375 | 712406 | -                | holA              | DNA polymerase III subunit delta                             |
| i02_0701  | CDS  | 712406 | 712987 | -                | rlpB              | LPS-assembly lipoprotein RlpB                                |
| i02_0702  | CDS  | 713002 | 715725 | -                | leuS              | leucyl-tRNA synthetase                                       |
| i02_0703  | CDS  | 715819 | 716301 | +                | ybeL              | hypothetical protein                                         |
| i02_0704  | CDS  | 716346 | 717281 | -                | rihA              | ribonucleoside hydrolase 1                                   |
| i02_0705  | CDS  | 717399 | 718124 | -                | gltL              | glutamate/aspartate transport ATP-binding component          |
| i02_0706  | CDS  | 718124 | 718798 | -                | gltK              | glutamate/aspartate transport system permease component      |
| i02_0707  | CDS  | 718798 | 719538 | -                | gltJ              | glutamate/aspartate transport system permease component      |
| i02_0708  | CDS  | 719708 | 720685 | -                | ybeJ              | glutamate and aspartate transporter subunit                  |
| i02_0709  | CDS  | 720751 | 720873 | +                | /                 | hypothetical protein                                         |
| i02_0710  | CDS  | 721070 | 722947 | +                | /                 | hypothetical protein                                         |
| i02_0711  | CDS  | 723025 | 724563 | -                | Int               | apolipoprotein N-acyltransferase                             |
| i02_0712  | CDS  | 724588 | 725466 | -                | ybeX              | magnesium and cobalt efflux protein corC                     |
| i02_0713  | CDS  | 725556 | 726023 | -                | ybeY              | putative metalloprotease                                     |
| i02_0714  | CDS  | 726020 | 727099 | -                | ybeZ              | PhoH-like protein                                            |
| i02_0715  | CDS  | 727079 | 727222 | +                | /                 | hypothetical protein                                         |
| i02_0716  | CDS  | 727213 | 728637 | -                | yleA              | hypothetical protein                                         |
| i02_0717  | CDS  | 728783 | 729958 | +                | ubiF              | 2-octaprenyl-3-methyl-6-methoxy-1,4-benzoquinone hydroxylase |
| i02_0718  | CDS  | 731198 | 733096 | -                | asnB              | asparagine synthetase B                                      |
| i02_0719  | CDS  | 733118 | 733870 | -                | nagD              | UMP phosphatase                                              |
| i02_0720  | CDS  | 733918 | 735138 | -                | nagC              | N-acetylglucosamine repressor                                |
| i02_0721  | CDS  | 735147 | 736295 | -                | nagA              | N-acetylglucosamine-6-phosphate deacetylase                  |
| i02_0722  | CDS  | 736355 | 737155 | -                | nagB              | glucosamine-6-phosphate deaminase                            |
| i02_0723  | CDS  | 737204 | 737338 | -                | /                 | hypothetical protein                                         |
| i02_0724  | CDS  | 737488 | 739434 | +                | nagE              | N-acetyl glucosamine specific PTS system                     |
| i02_0725  | CDS  | 739404 | 739556 | -                | /                 | hypothetical protein                                         |
| i02_0726  | CDS  | 739523 | 741049 | -                | /                 | hypothetical protein                                         |
| i02_0727  | CDS  | 740817 | 741275 | -                | /                 | hypthetical protein                                          |
| i02_0728  | CDS  | 741284 | 742453 | -                | /                 | hypthetical protein                                          |
| i02_0729  | CDS  | 742489 | 743247 | -                | /                 | hypothetical protein                                         |
| i02_0731  | CDS  | 743307 | 744194 | -                | /                 | putative dihydrodipicolinate synthase                        |
| i02_0732  | CDS  | 744198 | 745355 | -                | /                 | putative alcohol dehydrogenase                               |
| i02_0733  | CDS  | 745519 | 746760 | +                | /                 | putative inner membrane protein                              |
| i02_0734  | CDS  | 746753 | 747739 | +                | pdxA              | 4-hydroxythreonine-4-phosphate dehydrogenase 2               |
| i02_0735  | CDS  | 747741 | 748502 | +                | /                 | putative transcriptional regulator                           |
| i02_0736  | CDS  | 748722 | 750386 | +                | glnS              | glutaminyl-tRNA synthetase                                   |
| i02_0737  | CDS  | 750828 | 752234 | +                | ybfM              | hypothetical protein                                         |
| i02_0738  | CDS  | 752284 | 752610 | +                | ybfN              | lipoprotein ybfN precursor                                   |
| i02_0739  | CDS  | 752694 | 753140 | -                | fur               | ferric uptake regulator                                      |
| i02_0740  | CDS  | 753429 | 754076 | -                | fldA              | flavodoxin FldA                                              |
| i02_0741  | CDS  | 754099 | 754461 | -                | ybfE              | LexA regulated protein                                       |

| Locus_tag | Type | start  | End    | +/- <sup>a</sup> | Gene <sup>b</sup> | Product                                               |
|-----------|------|--------|--------|------------------|-------------------|-------------------------------------------------------|
| i02_0742  | CDS  | 754532 | 755296 | -                | ybfF              | hypothetical protein                                  |
| i02_0743  | CDS  | 755481 | 756026 | +                | seqA              | replication initiation regulator SeqA                 |
| i02_0744  | CDS  | 756001 | 757692 | +                | pgm               | phosphoglucomutase                                    |
| i02_0745  | CDS  | 757749 | 759068 | -                | potE              | putrescine transporter                                |
| i02_0746  | CDS  | 759065 | 761272 | -                | speF              | ornithine decarboxylase                               |
| i02_0747  | CDS  | 761277 | 761429 | -                | /                 | hypothetical protein                                  |
| i02_0748  | CDS  | 761656 | 761790 | -                | /                 | hypothetical protein                                  |
| i02_0749  | CDS  | 761793 | 761930 | +                | /                 | conserved hypothetical protein                        |
| i02_0750  | CDS  | 761952 | 762629 | -                | kdpE              | DNA-binding transcriptional activator KdpE            |
| i02_0751  | CDS  | 762626 | 765313 | -                | kdpD              | sensor protein KdpD                                   |
| i02_0752  | CDS  | 765303 | 765899 | -                | kdpC              | potassium-transporting ATPase subunit C               |
| i02_0753  | CDS  | 765884 | 767932 | -                | kdpB              | potassium-transporting ATPase subunit B               |
| i02_0754  | CDS  | 767955 | 769724 | -                | kdpA              | potassium-transporting ATPase subunit A               |
| i02_0755  | CDS  | 769628 | 769831 | -                | /                 | hypothetical protein                                  |
| i02_0756  | CDS  | 770030 | 770236 | +                | ybfA              | hypothetical protein                                  |
| i02_0757  | CDS  | 770337 | 770846 | +                | ybgA              | hypothetical protein                                  |
| i02_0758  | CDS  | 770843 | 772261 | +                | phrB              | deoxyribodipyrimidine photolyase                      |
| i02_0759  | CDS  | 772303 | 773784 | -                | ybgH              | putative transporter YbgH                             |
| i02_0760  | CDS  | 774055 | 774798 | +                | ybgI              | putative hydrolase-oxidase                            |
| i02_0761  | CDS  | 774821 | 775477 | +                | ybgJ              | hypothetical protein                                  |
| i02_0762  | CDS  | 775471 | 776403 | +                | ybgK              | hypothetical protein                                  |
| i02_0763  | CDS  | 776393 | 777127 | +                | ybgL              | LamB/YcsF family protein                              |
| i02_0764  | CDS  | 777163 | 777954 | +                | nei               | endonuclease VIII                                     |
| i02_0765  | CDS  | 777951 | 779042 | -                | abrB              | AbrB protein                                          |
| i02_0766  | CDS  | 779281 | 779523 | -                | /                 | hypothetical protein                                  |
| i02_0767  | CDS  | 779671 | 780954 | -                | gltA              | type II citrate synthase                              |
| i02_0768  | CDS  | 780936 | 781127 | +                | /                 | hypothetical protein                                  |
| i02_0769  | CDS  | 781648 | 782052 | +                | sdhC              | succinate dehydrogenase cytochrome b556 large subunit |
| i02_0770  | CDS  | 782046 | 782393 | +                | sdhD              | succinate dehydrogenase cytochrome b556 small subunit |
| i02_0771  | CDS  | 782381 | 784159 | +                | sdhA              | succinate dehydrogenase flavoprotein subunit          |
| i02_0772  | CDS  | 784175 | 784891 | +                | sdhB              | succinate dehydrogenase iron-sulfur subunit           |
| i02_0773  | CDS  | 785442 | 788243 | +                | sucA              | 2-oxoglutarate dehydrogenase E1 component             |
| i02_0774  | CDS  | 788258 | 789475 | +                | sucB              | dihydrolipoamide succinyltransferase                  |
| i02_0775  | CDS  | 789569 | 790735 | +                | sucC              | succinyl-CoA synthetase subunit beta                  |
| i02_0776  | CDS  | 790735 | 791604 | +                | sucD              | succinyl-CoA synthetase subunit alpha                 |
| i02_0777  | CDS  | 791844 | 792803 | +                | /                 | hypothetical protein                                  |
| i02_0778  | CDS  | 792832 | 793185 | +                | /                 | hypothetical protein                                  |
| i02_0779  | CDS  | 793272 | 793376 | -                | /                 | hypothetical protein                                  |
| i02_0780  | CDS  | 793471 | 793539 | -                | /                 | hypothetical protein                                  |
| i02_0781  | CDS  | 794286 | 795857 | +                | cydA              | cytochrome D ubiquinol oxidase subunit I              |
| i02_0782  | CDS  | 795873 | 797012 | +                | cydB              | cytochrome D ubiquinol oxidase subunit II             |
| i02_0783  | CDS  | 797027 | 797140 | +                | /                 | hypothetical protein                                  |
| i02_0784  | CDS  | 797140 | 797433 | +                | ybgE              | hypothetical protein                                  |
| i02_0785  | CDS  | 797583 | 797987 | +                | ybgC              | acyl-CoA thioester hydrolase YbgC                     |
| i02_0786  | CDS  | 797984 | 798676 | +                | tolQ              | colicin uptake protein TolQ                           |
| i02_0787  | CDS  | 798710 | 799108 | +                | tolR              | colicin uptake protein TolR                           |
| i02_0788  | CDS  | 799173 | 800393 | +                | tolA              | cell envelope integrity inner membrane protein        |
| i02_0789  | CDS  | 800523 | 801818 | +                | tolB              | translocation protein TolB                            |
| i02_0790  | CDS  | 801829 | 802374 | +                | pal               | peptidoglycan-associated outer membrane               |
| i02_0791  | CDS  | 802384 | 803175 | +                | ybgF              | hypothetical protein                                  |
| i02_0792  | CDS  | 803020 | 803319 | -                | /                 | hypothetical protein                                  |
| i02_0793  | CDS  | 804321 | 805364 | +                | nadA              | quinolinate synthetase                                |
| i02_0794  | CDS  | 805402 | 806121 | +                | pnuC              | protein pnuC                                          |
| i02_0795  | CDS  | 806118 | 806516 | -                | /                 | hypothetical protein                                  |
| i02_0796  | CDS  | 806620 | 807000 | -                | ybgS              | hypothetical protein                                  |
| i02_0797  | CDS  | 807316 | 808368 | +                | aroG              | phospho-2-dehydro-3-deoxyheptonate aldolase           |

| Locus_tag | Type | start  | End    | +/- <sup>a</sup> | Gene <sup>b</sup> | Product                                                            |
|-----------|------|--------|--------|------------------|-------------------|--------------------------------------------------------------------|
| i02_0798  | CDS  | 808534 | 809301 | -                | gpmA              | phosphoglyceromutase                                               |
| i02_0799  | CDS  | 809489 | 810529 | -                | galM              | aldose 1-epimerase                                                 |
| i02_0800  | CDS  | 810523 | 811671 | -                | galK              | galactokinase                                                      |
| i02_0801  | CDS  | 811675 | 812721 | -                | galT              | galactose-1-phosphate uridylyltransferase                          |
| i02_0802  | CDS  | 812731 | 813789 | -                | galE              | UDP-galactose-4-epimerase                                          |
| i02_0803  | CDS  | 814009 | 815481 | -                | modF              | putative molybdenum transport ATP-binding protein                  |
| i02_0804  | CDS  | 815549 | 816337 | -                | modE              | DNA-binding transcriptional regulator ModE                         |
| i02_0805  | CDS  | 816460 | 816615 | +                | ybhT              | hypothetical protein                                               |
| i02_0806  | CDS  | 816551 | 816760 | +                | /                 | hypothetical protein                                               |
| i02_0807  | CDS  | 816782 | 817555 | +                | modA              | molybdate transporter periplasmic protein                          |
| i02_0808  | CDS  | 817555 | 818244 | +                | modB              | molybdate ABC transporter permease protein                         |
| i02_0809  | CDS  | 818247 | 819305 | +                | modC              | molybdate transporter ATP-binding protein                          |
| i02_0810  | CDS  | 819306 | 820220 | -                | ybhA              | phosphotransferase                                                 |
| i02_0811  | CDS  | 820279 | 821274 | +                | ybhE              | 6-phosphogluconolactonase                                          |
| i02_0812  | CDS  | 821315 | 822331 | -                | ybhD              | putative transcriptional regulator YbhD                            |
| i02_0813  | CDS  | 822452 | 823504 | +                | ybhH              | hypothetical protein                                               |
| i02_0814  | CDS  | 823580 | 825013 | +                | ybhI              | hypothetical protein                                               |
| i02_0815  | CDS  | 825172 | 827457 | +                | ybhJ              | hypothetical protein                                               |
| i02_0816  | CDS  | 827597 | 828880 | -                | ybhC              | putative pectinesterase                                            |
| i02_0817  | CDS  | 829032 | 829508 | -                | ybhB              | putative kinase inhibitor protein                                  |
| i02_0818  | CDS  | 829617 | 830747 | +                | gipA              | Peyer's patch-specific virulence factor GipA                       |
| i02_0820  | CDS  | 830858 | 832147 | -                | bioA              | adenosylmethionine-8-amino-7-oxononanoate aminotransferase monomer |
| i02_0821  | CDS  | 832234 | 833274 | +                | bioB              | biotin synthase                                                    |
| i02_0822  | CDS  | 833271 | 834425 | +                | bioF              | 8-amino-7-oxononanoate synthase                                    |
| i02_0823  | CDS  | 834412 | 835167 | +                | bioC              | biotin biosynthesis protein BioC                                   |
| i02_0824  | CDS  | 835160 | 835837 | +                | bioD              | dithiobiotin synthetase                                            |
| i02_0825  | CDS  | 836004 | 836141 | -                | /                 | hypothetical protein                                               |
| i02_0826  | CDS  | 836416 | 838437 | +                | uvrB              | excinuclease ABC subunit B                                         |
| i02_0827  | CDS  | 838475 | 839443 | -                | ybhK              | hypothetical protein                                               |
| i02_0828  | CDS  | 839699 | 840769 | +                | moaA              | molybdenum cofactor biosynthesis protein A                         |
| i02_0829  | CDS  | 840791 | 841303 | +                | moaB              | molybdenum cofactor biosynthesis protein B                         |
| i02_0830  | CDS  | 841045 | 841536 | -                | /                 | hypothetical protein                                               |
| i02_0831  | CDS  | 841306 | 841791 | +                | moaC              | molybdenum cofactor biosynthesis protein C                         |
| i02_0832  | CDS  | 841784 | 842029 | +                | moaD              | molybdopterin synthase small subunit                               |
| i02_0833  | CDS  | 842031 | 842483 | +                | moaE              | molybdopterin synthase large subunit                               |
| i02_0834  | CDS  | 842539 | 843324 | +                | ybhL              | hypothetical protein                                               |
| i02_0835  | CDS  | 843256 | 843387 | -                | /                 | hypothetical protein                                               |
| i02_0836  | CDS  | 843503 | 844243 | +                | ybhM              | hypothetical protein                                               |
| i02_0837  | CDS  | 844279 | 845235 | -                | ybhN              | hypothetical protein                                               |
| i02_0838  | CDS  | 845235 | 846476 | -                | ybhO              | cardiolipin synthase 2                                             |
| i02_0839  | CDS  | 846473 | 847234 | -                | ybhP              | hypothetical protein                                               |
| i02_0840  | CDS  | 847367 | 847777 | +                | ybhQ              | hypothetical protein                                               |
| i02_0841  | CDS  | 847739 | 848845 | -                | ybhR              | hypothetical protein                                               |
| i02_0842  | CDS  | 848856 | 849989 | -                | ybhS              | hypothetical protein                                               |
| i02_0843  | CDS  | 849982 | 851733 | -                | ybhF              | ABC transporter ATP-binding protein                                |
| i02_0844  | CDS  | 851711 | 852709 | -                | ybhG              | hypothetical protein                                               |
| i02_0845  | CDS  | 852709 | 853392 | -                | ybiH              | putative DNA-binding transcriptional regulator                     |
| i02_0846  | CDS  | 853609 | 854970 | +                | rhIE              | ATP-dependent RNA helicase RhIE                                    |
| i02_0847  | CDS  | 855203 | 855508 | -                | /                 | hypothetical protein                                               |
| i02_0848  | CDS  | 855507 | 857657 | +                | dinG              | ATP-dependent DNA helicase DinG                                    |
| i02_0849  | CDS  | 857685 | 858647 | +                | ybiB              | glycosyl transferase family protein                                |
| i02_0850  | CDS  | 858788 | 859873 | +                | ybiC              | hypothetical protein                                               |
| i02_0851  | CDS  | 860101 | 860361 | -                | ybiJ              | hypothetical protein                                               |
| i02_0852  | CDS  | 860626 | 860892 | -                | /                 | hypothetical protein                                               |
| i02_0853  | CDS  | 860966 | 861679 | -                | ybiX              | putative hydroxylase                                               |
| i02_0854  | CDS  | 861859 | 864141 | -                | ybiL              | catecholate siderophore receptor Fiu                               |

| Locus_tag | Type   | start  | End    | +/- <sup>a</sup> | Gene <sup>b</sup> | Product                                        |
|-----------|--------|--------|--------|------------------|-------------------|------------------------------------------------|
| i02_0855  | CDS    | 864406 | 864813 | -                | ybiM              | hypothetical protein                           |
| i02_0856  | CDS    | 864852 | 865868 | +                | ybiN              | putative SAM-dependent methyltransferase       |
| i02_0857  | CDS    | 865865 | 868090 | -                | ybiO              | hypothetical protein                           |
| i02_0858  | CDS    | 868207 | 868929 | -                | glnQ              | glutamine ABC transporter ATP-binding protein  |
| i02_0859  | CDS    | 868926 | 869585 | -                | glnP              | glutamine ABC transporter permease protein     |
| i02_0860  | CDS    | 869724 | 870470 | -                | glnH              | glutamine ABC transporter periplasmic protein  |
| i02_0861  | CDS    | 870397 | 870588 | -                | /                 | hypothetical protein                           |
| i02_0862  | CDS    | 870874 | 871470 | -                | dps               | DNA starvation/stationary phase protection     |
| i02_0863  | CDS    | 871678 | 872577 | -                | ybiF              | threonine and homoserine efflux system         |
| i02_0864  | CDS    | 872912 | 873433 | +                | ompX              | outer membrane protein X                       |
| i02_0865  | CDS    | 873483 | 875066 | -                | ybiP              | hypothetical protein                           |
| i02_0866  | CDS    | 875338 | 875466 | -                | /                 | hypothetical protein                           |
| i02_0867  | CDS    | 875652 | 876119 | +                | /                 | manganese transport regulator MntR             |
| i02_0868  | CDS    | 876116 | 877234 | +                | ybiR              | hypothetical protein                           |
| i02_0869  | CDS    | 877292 | 878212 | -                | ybiS              | hypothetical protein                           |
| i02_0870  | CDS    | 878431 | 880023 | +                | ybiT              | ABC transporter ATP-binding protein            |
| i02_0871  | CDS    | 880223 | 881038 | -                | ybiV              | hypothetical protein                           |
| i02_0872  | CDS    | 881184 | 883616 | -                | ybiW              | putative formate acetyltransferase 3           |
| i02_0873  | CDS    | 883622 | 884548 | -                | /                 | putative pyruvate formate-lyase 3 activating   |
| i02_0874  | CDS    | 884652 | 885314 | +                | mipB              | fructose-6-phosphate aldolase                  |
| i02_0875  | CDS    | 885390 | 886139 | -                | moeB              | molybdopterin biosynthesis protein MoeB        |
| i02_0876  | CDS    | 886139 | 887374 | -                | moeA              | molybdopterin biosynthesis protein MoeA        |
| i02_0877  | CDS    | 887578 | 888543 | +                | ybiK              | L-asparaginase                                 |
| i02_0878  | CDS    | 888422 | 890401 | +                | yliA              | glutathione transporter ATP-binding protein    |
| i02_0879  | CDS    | 890154 | 891959 | +                | /                 | putative binding protein yliB precursor        |
| i02_0880  | CDS    | 891977 | 892897 | +                | yliC              | ABC transporter permease                       |
| i02_0881  | CDS    | 892900 | 893811 | +                | yliD              | ABC transporter permease                       |
| i02_0882  | CDS    | 893988 | 896336 | +                | yliE              | hypothetical protein                           |
| i02_0883  | CDS    | 896344 | 897672 | +                | yliF              | membrane protein yliF                          |
| i02_0884  | CDS    | 897719 | 899044 | -                | yliG              | hypothetical protein                           |
| i02_0885  | CDS    | 899257 | 899640 | +                | bssR              | biofilm formation regulatory protein BssR      |
| i02_0886  | CDS    | 899751 | 900866 | +                | yliI              | hypothetical protein                           |
| i02_0887  | CDS    | 900863 | 901495 | -                | yliJ              | GST-like protein yliJ                          |
| i02_0888  | CDS    | 901715 | 902938 | +                | dacC              | D-alanyl-D-alanine carboxypeptidase fraction C |
| i02_0889  | CDS    | 902985 | 903743 | -                | deoR              | DNA-binding transcriptional repressor DeoR     |
| i02_0890  | CDS    | 903801 | 904397 | -                | ybjG              | undecaprenyl pyrophosphate phosphatase         |
| i02_0891  | CDS    | 904652 | 905914 | +                | cmr               | multidrug translocase mdFA                     |
| i02_0892  | CDS    | 905955 | 906239 | -                | ybjH              | hypothetical protein                           |
| i02_0893  | CDS    | 906325 | 907143 | -                | /                 | hypothetical protein                           |
| i02_0894  | CDS    | 907140 | 908411 | -                | ybjJ              | hypothetical protein                           |
| i02_0895  | CDS    | 908402 | 908968 | +                | ybjK              | hypothetical protein                           |
| i02_0896  | CDS    | 909143 | 910828 | -                | ybjL              | hypothetical protein                           |
| i02_0897  | CDS    | 911098 | 911475 | +                | ybjM              | hypothetical protein                           |
| i02_0898  | CDS    | 911505 | 911777 | -                | grxA              | glutaredoxin 1                                 |
| i02_0899  | CDS    | 911922 | 912209 | +                | ybjC              | hypothetical protein                           |
| i02_0900  | CDS    | 912193 | 912915 | +                | mdaA              | nitroreductase A                               |
| i02_0901  | CDS    | 912976 | 913878 | +                | rimK              | ribosomal protein S6 modification protein      |
| i02_0902  | CDS    | 913918 | 914442 | +                | ybjN              | hypothetical protein                           |
| i02_0903  | CDS    | 914647 | 915903 | +                | potF              | putrescine transporter subunit                 |
| i02_0904  | CDS    | 915917 | 917131 | +                | potG              | putrescine transporter ATP-binding subunit     |
| i02_0905  | CDS    | 917141 | 918085 | +                | potH              | putrescine transporter subunit                 |
| i02_0906  | pseudo | 918040 | 918927 | +                | potI              | putrescine transporter subunit                 |
| i02_0907  | CDS    | 918987 | 919475 | +                | ybjO              | hypothetical protein                           |
| i02_0908  | CDS    | 919516 | 920643 | +                | rumB              | 23S rRNA methyluridine methyltransferase       |
| i02_0909  | CDS    | 920672 | 921454 | -                | artJ              | arginine-binding periplasmic protein 2         |
| i02_0910  | CDS    | 921629 | 922297 | -                | artM              | arginine transporter permease subunit ArtM     |
| i02_0911  | CDS    | 922297 | 923013 | -                | artQ              | arginine transporter permease subunit ArtQ     |
| i02_0912  | CDS    | 923020 | 923751 | -                | artI              | arginine-binding periplasmic protein 1         |



| <b>Locus_tag</b> | <b>Type</b> | <b>start</b> | <b>End</b> | <b>+/-<sup>a</sup></b> | <b>Gene<sup>b</sup></b> | <b>Product</b>                                   |
|------------------|-------------|--------------|------------|------------------------|-------------------------|--------------------------------------------------|
| i02_0913         | CDS         | 923769       | 924503     | -                      | artP                    | arginine transporter ATP-binding subunit         |
| i02_0914         | CDS         | 924715       | 925254     | -                      | ybjP                    | putative lipoprotein                             |
| i02_0915         | CDS         | 925356       | 925679     | +                      | ybjQ                    | hypothetical protein                             |
| i02_0916         | CDS         | 925676       | 926506     | +                      | ybjR                    | N-acetylmuramoyl-L-alanine amidase ybjR          |
| i02_0917         | CDS         | 926503       | 927579     | -                      | /                       | hypothetical protein                             |
| i02_0918         | CDS         | 927615       | 929120     | -                      | ybjT                    | hypothetical protein                             |
| i02_0919         | CDS         | 929056       | 930057     | -                      | ybjU                    | L-threonine aldolase                             |
| i02_0920         | CDS         | 930094       | 931812     | -                      | poxB                    | pyruvate dehydrogenase                           |
| i02_0921         | CDS         | 931945       | 932919     | -                      | /                       | HCP oxidoreductase, NADH-dependent               |
| i02_0922         | CDS         | 932925       | 934583     | -                      | ybjW                    | hydroxylamine reductase                          |
| i02_0923         | CDS         | 934721       | 935665     | -                      | ybjE                    | hypothetical protein                             |
| i02_0924         | CDS         | 935598       | 935732     | +                      | /                       | hypothetical protein                             |
| i02_0925         | CDS         | 936114       | 936815     | -                      | aqpZ                    | aquaporin Z                                      |
| i02_0926         | CDS         | 937022       | 937177     | -                      | /                       | hypothetical protein                             |
| i02_0927         | CDS         | 937235       | 938893     | +                      | ybjD                    | hypothetical protein                             |
| i02_0928         | CDS         | 938890       | 939882     | -                      | ybjX                    | hypothetical protein                             |
| i02_0929         | CDS         | 939951       | 940085     | +                      | /                       | hypothetical protein                             |
| i02_0930         | CDS         | 939997       | 941112     | +                      | macA                    | macrolide transporter subunit MacA               |
| i02_0931         | CDS         | 941109       | 943055     | +                      | /                       | hypothetical protein                             |
| i02_0932         | CDS         | 943128       | 943382     | -                      | cspD                    | stationary phase/starvation inducible regulatory |
| i02_0933         | CDS         | 943675       | 943995     | +                      | clpS                    | ATP-dependent Clp protease adaptor protein ClpS  |
| i02_0934         | CDS         | 944020       | 946302     | +                      | clpA                    | ATP-dependent Clp protease ATP-binding subunit   |
| i02_0935         | CDS         | 946987       | 947205     | -                      | infA                    | translation initiation factor IF-1               |
| i02_0936         | CDS         | 947490       | 948194     | -                      | aat                     | leucyl/phenylalanyl-tRNA--protein transferase    |
| i02_0937         | CDS         | 948236       | 949957     | -                      | cydC                    | cysteine/glutathione ABC transporter             |
| i02_0938         | CDS         | 949958       | 951724     | -                      | cydD                    | cysteine/glutathione ABC transporter             |
| i02_0939         | CDS         | 951847       | 952932     | -                      | trxB                    | thioredoxin reductase                            |
| i02_0940         | CDS         | 953302       | 953850     | +                      | lrp                     | leucine-responsive transcriptional regulator     |
| i02_0941         | CDS         | 953985       | 958028     | +                      | ftsK                    | DNA translocase FtsK                             |
| i02_0942         | CDS         | 958184       | 958798     | +                      | lolA                    | outer-membrane lipoprotein carrier protein       |
| i02_0943         | CDS         | 958809       | 960152     | +                      | ycaJ                    | recombination factor protein RarA                |
| i02_0944         | CDS         | 960243       | 961535     | +                      | serS                    | seryl-tRNA synthetase                            |
| i02_0945         | CDS         | 961774       | 964218     | +                      | dmsA                    | anaerobic dimethyl sulfoxide reductase chain A   |
| i02_0946         | CDS         | 964229       | 964846     | +                      | dmsB                    | anaerobic dimethyl sulfoxide reductase chain B   |
| i02_0947         | CDS         | 964788       | 965711     | +                      | dmsC                    | anaerobic dimethyl sulfoxide reductase chain C   |
| i02_0948         | CDS         | 965747       | 966472     | -                      | ycaC                    | hypothetical protein                             |
| i02_0949         | CDS         | 966528       | 966656     | -                      | /                       | hypothetical protein                             |
| i02_0950         | CDS         | 966687       | 967835     | +                      | ycaD                    | putative MFS family transporter protein          |
| i02_0951         | CDS         | 967932       | 968672     | -                      | pflA                    | pyruvate formate lyase-activating enzyme 1       |
| i02_0952         | CDS         | 968864       | 971146     | -                      | pflB                    | PflB                                             |
| i02_0954         | CDS         | 971201       | 972397     | -                      | focA_2                  | formate transporter                              |
| i02_0955         | CDS         | 972464       | 974257     | -                      | ycaO                    | hypothetical protein                             |
| i02_0956         | CDS         | 974354       | 975046     | +                      | ycaP                    | hypothetical protein                             |
| i02_0957         | CDS         | 975245       | 976333     | +                      | serC                    | phosphoserine aminotransferase                   |
| i02_0958         | CDS         | 976404       | 977687     | +                      | aroA                    | 3-phosphoshikimate 1-carboxyvinyltransferase     |
| i02_0959         | CDS         | 977848       | 978621     | +                      | ycaL                    | putative metalloprotease ycaL                    |
| i02_0960         | CDS         | 978794       | 979477     | +                      | cmk                     | cytidylate kinase                                |
| i02_0961         | CDS         | 979588       | 981261     | +                      | rpsA                    | 30S ribosomal protein S1                         |
| i02_0962         | CDS         | 981421       | 981705     | +                      | ihfB                    | integration host factor subunit beta             |
| i02_0963         | CDS         | 981911       | 984175     | +                      | ycaI                    | hypothetical protein                             |
| i02_0964         | CDS         | 984212       | 985960     | +                      | msbA                    | lipid transporter ATP-binding/permease protein   |
| i02_0965         | CDS         | 985957       | 986943     | +                      | lpxK                    | tetraacyldisaccharide 4'-kinase                  |
| i02_0966         | CDS         | 986980       | 988212     | +                      | ycaQ                    | hypothetical protein                             |
| i02_0967         | CDS         | 988264       | 988446     | +                      | ycaR                    | hypothetical protein                             |
| i02_0968         | CDS         | 988443       | 989189     | +                      | kdsB                    | 3-deoxy-manno-octulosonate cytidyltransferase    |
| i02_0969         | CDS         | 989343       | 990236     | +                      | ycbJ                    | hypothetical protein                             |
| i02_0970         | CDS         | 990213       | 990992     | -                      | ycbC                    | hypothetical protein                             |
| i02_0971         | CDS         | 990895       | 991059     | -                      | /                       | hypothetical protein                             |

| Locus_tag | Type | start   | End     | +/- <sup>a</sup> | Gene <sup>b</sup> | Product                                                 |
|-----------|------|---------|---------|------------------|-------------------|---------------------------------------------------------|
| i02_0972  | CDS  | 991116  | 991913  | +                | smtA              | putative metallothionein SmtA                           |
| i02_0973  | CDS  | 991910  | 993232  | +                | mukF              | condesin subunit F                                      |
| i02_0974  | CDS  | 993186  | 993917  | +                | mukE              | condesin subunit E                                      |
| i02_0975  | CDS  | 993917  | 998377  | +                | mukB              | cell division protein MukB                              |
| i02_0976  | CDS  | 998638  | 1000485 | +                | ycbB              | hypothetical protein                                    |
| i02_0977  | CDS  | 1000657 | 1001214 | +                | ycbK              | hypothetical protein                                    |
| i02_0978  | CDS  | 1001241 | 1001888 | +                | ycbL              | hypothetical protein                                    |
| i02_0979  | CDS  | 1001938 | 1003128 | -                | aspC              | aromatic amino acid aminotransferase                    |
| i02_0980  | CDS  | 1003313 | 1004401 | -                | ompF              | outer membrane protein F                                |
| i02_0981  | CDS  | 1005004 | 1006404 | -                | asnC              | asparaginyl-tRNA synthetase                             |
| i02_0982  | CDS  | 1006573 | 1007823 | -                | pncB              | nicotinate phosphoribosyltransferase                    |
| i02_0983  | CDS  | 1008041 | 1010653 | +                | pepN              | aminopeptidase N                                        |
| i02_0984  | CDS  | 1010848 | 1011615 | -                | ssuB              | aliphatic sulfonates transport ATP-binding component    |
| i02_0985  | CDS  | 1011612 | 1012406 | -                | ssuC              | alkanesulfonate transporter permease subunit            |
| i02_0986  | CDS  | 1012415 | 1013560 | -                | ycbN              | alkanesulfonate monooxygenase                           |
| i02_0987  | CDS  | 1013557 | 1014558 | -                | ycbO              | alkanesulfonate transporter substrate-binding component |
| i02_0988  | CDS  | 1014509 | 1015084 | -                | ycbP              | NAD(P)H-dependent FMN reductase                         |
| i02_0989  | CDS  | 1015294 | 1016331 | +                | pyrD              | dihydroorotate dehydrogenase 2                          |
| i02_0990  | CDS  | 1016469 | 1017047 | +                | ycbW              | hypothetical protein                                    |
| i02_0991  | CDS  | 1017044 | 1018153 | -                | ycbX              | hypothetical protein                                    |
| i02_0992  | CDS  | 1018251 | 1020359 | +                | rlmL              | 23S rRNA m(2)G2445 methyltransferase                    |
| i02_0993  | CDS  | 1020371 | 1022278 | +                | uup               | ABC transporter ATPase component                        |
| i02_0994  | CDS  | 1022408 | 1023661 | +                | pqiA              | paraquat-inducible protein A                            |
| i02_0995  | CDS  | 1023606 | 1025306 | +                | pqiB              | paraquat-inducible protein B                            |
| i02_0996  | CDS  | 1025303 | 1025866 | +                | ymbA              | hypothetical protein                                    |
| i02_0997  | CDS  | 1026031 | 1026162 | -                | /                 | hypothetical protein                                    |
| i02_0998  | CDS  | 1026358 | 1027074 | -                | fabA              | 3-hydroxydecanoyl-(acyl carrier protein)                |
| i02_0999  | CDS  | 1026945 | 1028705 | -                | /                 | putative protease La-like protein                       |
| i02_1000  | CDS  | 1028891 | 1029343 | +                | ycbG              | hypothetical protein                                    |
| i02_1001  | CDS  | 1029421 | 1030560 | -                | ompA              | outer membrane protein A                                |
| i02_1002  | CDS  | 1030627 | 1030845 | +                | /                 | hypothetical protein                                    |
| i02_1003  | CDS  | 1030829 | 1031344 | -                | sulA              | SOS cell division inhibitor                             |
| i02_1004  | CDS  | 1031557 | 1032186 | +                | yccR              | hypothetical protein                                    |
| i02_1005  | CDS  | 1032149 | 1034311 | -                | yccS              | hypothetical protein                                    |
| i02_1006  | CDS  | 1034321 | 1034767 | -                | yccF              | hypothetical protein                                    |
| i02_1007  | CDS  | 1034797 | 1036944 | +                | helD              | DNA helicase IV                                         |
| i02_1008  | CDS  | 1036976 | 1037443 | -                | mgsA              | methylglyoxal synthase                                  |
| i02_1009  | CDS  | 1037530 | 1038192 | -                | yccT              | hypothetical protein                                    |
| i02_1010  | CDS  | 1038284 | 1038778 | +                | /                 | hypothetical protein                                    |
| i02_1011  | CDS  | 1038823 | 1039191 | -                | yccV              | hypothetical protein                                    |
| i02_1012  | CDS  | 1039198 | 1040388 | -                | yccW              | hypothetical protein                                    |
| i02_1013  | CDS  | 1040270 | 1040761 | +                | /                 | putative acylphosphatase                                |
| i02_1014  | CDS  | 1040758 | 1041087 | -                | yccK              | sulfur transfer protein TusE                            |
| i02_1015  | CDS  | 1041179 | 1041838 | -                | yccA              | hypothetical protein                                    |
| i02_1016  | CDS  | 1042400 | 1042540 | -                | /                 | hypothetical protein                                    |
| i02_1017  | CDS  | 1042532 | 1043677 | +                | hyaA              | hydrogenase-1 small chain precursor                     |
| i02_1018  | CDS  | 1043674 | 1045467 | +                | hyaB              | hydrogenase 1 large subunit                             |
| i02_1019  | CDS  | 1045486 | 1046193 | +                | hyaC              | hydrogenase 1 b-type cytochrome subunit                 |
| i02_1020  | CDS  | 1046190 | 1046777 | +                | hyaD              | hydrogenase 1 maturation protease                       |
| i02_1021  | CDS  | 1046774 | 1047172 | +                | hyaE              | hydrogenase-1 operon protein HyaE                       |
| i02_1022  | CDS  | 1047109 | 1048026 | +                | hyaF              | hydrogenase-1 operon protein HyaF                       |
| i02_1023  | CDS  | 1048154 | 1049704 | +                | appC              | cytochrome bd-II oxidase subunit I                      |
| i02_1024  | CDS  | 1049716 | 1050852 | +                | appB              | cytochrome bd-II oxidase subunit II                     |
| i02_1025  | CDS  | 1051007 | 1052347 | +                | appA              | phosphoanhydride phosphorylase                          |
| i02_1026  | CDS  | 1052335 | 1052547 | -                | cspH              | cold shock-like protein cspH                            |
| i02_1027  | CDS  | 1052833 | 1053045 | +                | cspG              | cold shock protein CspG                                 |

| Locus_tag | Type | start   | End     | +/- <sup>a</sup> | Gene <sup>b</sup> | Product                                         |
|-----------|------|---------|---------|------------------|-------------------|-------------------------------------------------|
| i02_1028  | CDS  | 1053186 | 1053449 | +                | sfa               | cold shock gene                                 |
| i02_1029  | CDS  | 1053439 | 1053612 | +                | /                 | GnsB protein                                    |
| i02_1030  | CDS  | 1053661 | 1054734 | -                | yccM              | putative electron transport protein yccM        |
| i02_1031  | CDS  | 1054817 | 1057549 | -                | torS              | hybrid sensory histidine kinase TorS            |
| i02_1032  | CDS  | 1057632 | 1058660 | +                | torT              | TMAO reductase system periplasmic protein TorT  |
| i02_1033  | CDS  | 1058633 | 1059325 | -                | torR              | DNA-binding transcriptional regulator TorR      |
| i02_1034  | CDS  | 1059407 | 1060627 | +                | torC              | cytochrome c-type protein torC                  |
| i02_1035  | CDS  | 1060627 | 1063173 | +                | torA              | trimethylamine-N-oxide reductase 1 precursor    |
| i02_1036  | CDS  | 1063137 | 1063769 | +                | torD              | chaperone protein TorD                          |
| i02_1037  | CDS  | 1064125 | 1064430 | -                | yccD              | chaperone-modulator protein CbpM                |
| i02_1038  | CDS  | 1064430 | 1065350 | -                | cbpA              | curved DNA-binding protein CbpA                 |
| i02_1039  | CDS  | 1065885 | 1067126 | +                | agp               | glucose-1-phosphatase/inositol phosphatase      |
| i02_1040  | CDS  | 1067164 | 1067391 | -                | yccJ              | hypothetical protein                            |
| i02_1041  | CDS  | 1067412 | 1068008 | -                | wrbA              | TrpR binding protein WrbA                       |
| i02_1042  | CDS  | 1068412 | 1068570 | +                | /                 | hypothetical protein                            |
| i02_1043  | CDS  | 1068637 | 1070031 | -                | ycdG              | putative purine permease ycdG                   |
| i02_1044  | CDS  | 1069986 | 1070561 | -                | /                 | putative flavin:NADH reductase ycdH             |
| i02_1045  | CDS  | 1070491 | 1071081 | -                | /                 | hypothetical protein                            |
| i02_1046  | CDS  | 1071091 | 1071891 | -                | ycdJ              | hypothetical protein                            |
| i02_1047  | CDS  | 1071899 | 1072285 | -                | ycdK              | hypothetical protein                            |
| i02_1048  | CDS  | 1072297 | 1073031 | -                | ycdL              | isochorismatase family protein ycdL             |
| i02_1049  | CDS  | 1072989 | 1074170 | -                | /                 | putative monooxygenase ycdM                     |
| i02_1050  | CDS  | 1074341 | 1075006 | +                | ycdC              | putative transcriptional regulator YcdC         |
| i02_1051  | CDS  | 1075046 | 1079008 | -                | putA              | trifunctional transcriptional regulator/proline |
| i02_1052  | CDS  | 1079063 | 1079272 | +                | /                 | hypothetical protein                            |
| i02_1053  | CDS  | 1079160 | 1079351 | -                | /                 | hypothetical protein                            |
| i02_1054  | CDS  | 1079431 | 1080939 | +                | putP              | Sodium/proline symporter                        |
| i02_1055  | CDS  | 1081150 | 1081989 | +                | /                 | putative cytochrome                             |
| i02_1056  | CDS  | 1082047 | 1083174 | +                | ycdO              | hypothetical protein                            |
| i02_1057  | CDS  | 1083180 | 1084451 | +                | ycdB              | hypothetical protein                            |
| i02_1058  | CDS  | 1084588 | 1084722 | -                | /                 | hypothetical protein                            |
| i02_1059  | CDS  | 1084942 | 1085865 | +                | phoH              | hypothetical protein                            |
| i02_1060  | CDS  | 1085915 | 1086328 | -                | ycdP              | hypothetical protein                            |
| i02_1061  | CDS  | 1086330 | 1087655 | -                | ycdQ              | N-glycosyltransferase PgaC                      |
| i02_1062  | CDS  | 1087648 | 1089666 | -                | ycdR              | lipoprotein ycdR precursor                      |
| i02_1063  | CDS  | 1089675 | 1092098 | -                | pgaA              | outer membrane protein PgaA                     |
| i02_1064  | CDS  | 1092563 | 1094053 | +                | ycdT              | hypothetical protein                            |
| i02_1065  | CDS  | 1094332 | 1095534 | +                | /                 | P4 family integrase                             |
| i02_1066  | CDS  | 1095722 | 1097539 | -                | /                 | hypothetical protein                            |
| i02_1067  | CDS  | 1097825 | 1097989 | +                | /                 | hypothetical protein                            |
| i02_1068  | CDS  | 1098037 | 1098429 | +                | /                 | hypothetical protein                            |
| i02_1069  | CDS  | 1098701 | 1098949 | +                | alpA              | prophage CP4-57 regulatory protein alpA         |
| i02_1070  | CDS  | 1099574 | 1101034 | +                | /                 | hypothetical protein                            |
| i02_1071  | CDS  | 1101998 | 1102591 | +                | /                 | hypothetical protein                            |
| i02_1072  | CDS  | 1102693 | 1102899 | +                | /                 | hypothetical protein                            |
| i02_1073  | CDS  | 1103068 | 1105068 | -                | /                 | hypothetical protein                            |
| i02_1074  | CDS  | 1104983 | 1106149 | -                | /                 | putative aminotransferase                       |
| i02_1075  | CDS  | 1106571 | 1107194 | -                | /                 | hypothetical protein                            |
| i02_1076  | CDS  | 1109059 | 1109583 | +                | /                 | hypothetical protein                            |
| i02_1077  | CDS  | 1109622 | 1110047 | +                | /                 | hypothetical protein                            |
| i02_1079  | CDS  | 1110357 | 1111586 | -                | /                 | 3-oxoacyl-(acyl carrier protein) synthase II    |
| i02_1080  | CDS  | 1111583 | 1112314 | -                | fabG              | 3-ketoacyl-(acyl-carrier-protein) reductase     |
| i02_1081  | CDS  | 1112314 | 1112778 | -                | /                 | hypothetical protein                            |
| i02_1082  | CDS  | 1112775 | 1113953 | -                | /                 | 3-oxoacyl-(acyl carrier protein) synthase I     |
| i02_1083  | CDS  | 1113946 | 1114530 | -                | /                 | hypothetical protein                            |
| i02_1084  | CDS  | 1114527 | 1116845 | -                | /                 | hypothetical protein                            |
| i02_1085  | CDS  | 1116814 | 1117419 | -                | /                 | hypothetical protein                            |
| i02_1086  | CDS  | 1117416 | 1117838 | -                | /                 | hypothetical protein                            |

| Locus_tag | Type | start   | End     | +/- <sup>a</sup> | Gene <sup>b</sup> | Product                                               |
|-----------|------|---------|---------|------------------|-------------------|-------------------------------------------------------|
| i02_1087  | CDS  | 1117842 | 1119464 | -                | /                 | hypothetical protein                                  |
| i02_1088  | CDS  | 1119436 | 1119558 | -                | /                 | hypothetical protein                                  |
| i02_1089  | CDS  | 1119509 | 1119886 | -                | /                 | hypothetical protein                                  |
| i02_1090  | CDS  | 1119849 | 1121207 | -                | /                 | hypothetical protein                                  |
| i02_1091  | CDS  | 1121204 | 1121788 | -                | /                 | hypothetical protein                                  |
| i02_1092  | CDS  | 1121790 | 1122041 | -                | /                 | acyl carrier protein                                  |
| i02_1093  | CDS  | 1122053 | 1122310 | -                | /                 | putative acyl carrier protein                         |
| i02_1094  | CDS  | 1122285 | 1123124 | -                | /                 | putative phospholipid biosynthesis                    |
| i02_1095  | CDS  | 1123103 | 1123849 | -                | /                 | hypothetical protein                                  |
| i02_1096  | CDS  | 1123866 | 1124924 | -                | /                 | putative O-methyltransferase                          |
| i02_1097  | CDS  | 1124989 | 1125378 | -                | /                 | hypothetical protein                                  |
| i02_1098  | CDS  | 1125943 | 1128669 | +                | /                 | hypothetical protein                                  |
| i02_1099  | CDS  | 1129856 | 1131433 | +                | /                 | hypothetical protein                                  |
| i02_1100  | CDS  | 1131954 | 1132331 | +                | /                 | hypothetical protein                                  |
| i02_1101  | CDS  | 1132830 | 1133225 | +                | /                 | hypothetical protein                                  |
| i02_1103  | CDS  | 1133196 | 1133720 | -                | /                 | hypothetical protein                                  |
| i02_1104  | CDS  | 1133740 | 1134255 | -                | /                 | conserved hypothetical protein                        |
| i02_1105  | CDS  | 1134347 | 1134547 | -                | /                 | hypothetical protein                                  |
| i02_1106  | CDS  | 1134451 | 1135014 | +                | /                 | hypothetical protein                                  |
| i02_1107  | CDS  | 1135091 | 1135330 | -                | /                 | Cea protein                                           |
| i02_1108  | CDS  | 1136088 | 1136297 | +                | /                 | entry exclusion protein 2                             |
| i02_1109  | CDS  | 1136420 | 1136575 | -                | /                 | hypothetical protein                                  |
| i02_1110  | CDS  | 1136596 | 1136904 | -                | /                 | hypothetical protein                                  |
| i02_1111  | CDS  | 1136986 | 1137489 | -                | /                 | hypothetical protein                                  |
| i02_1112  | CDS  | 1137461 | 1138210 | -                | /                 | putative transposase                                  |
| i02_1113  | CDS  | 1138632 | 1138745 | -                | /                 | conserved hypothetical protein                        |
| i02_1114  | CDS  | 1139113 | 1140189 | +                | /                 | phospho-2-dehydro-3-deoxyheptonate aldolase           |
| i02_1115  | CDS  | 1140077 | 1140310 | +                | /                 | hypothetical protein                                  |
| i02_1116  | CDS  | 1140660 | 1140791 | +                | /                 | hypothetical protein                                  |
| i02_1117  | CDS  | 1141066 | 1142007 | -                | /                 | transposase insF                                      |
| i02_1118  | CDS  | 1141991 | 1142215 | -                | /                 | transposase insE                                      |
| i02_1119  | CDS  | 1143383 | 1143676 | +                | mchB              | MchB protein                                          |
| i02_1120  | CDS  | 1143948 | 1145498 | +                | mchC              | MchC protein                                          |
| i02_1121  | CDS  | 1145524 | 1145976 | +                | mchD              | MchD protein                                          |
| i02_1122  | CDS  | 1146129 | 1147403 | +                | mchE              | microcin H47 secretion protein                        |
| i02_1123  | CDS  | 1147378 | 1149492 | +                | mchF              | microcin H47 secretion ATP-binding protein            |
| i02_1124  | CDS  | 1149528 | 1149749 | +                | /                 | conserved domain protein                              |
| i02_1125  | CDS  | 1150199 | 1150885 | -                | /                 | hypothetical protein                                  |
| i02_1126  | CDS  | 1150985 | 1151455 | -                | /                 | hypothetical protein                                  |
| i02_1127  | CDS  | 1151901 | 1152413 | +                | /                 | hypothetical protein                                  |
| i02_1128  | CDS  | 1152646 | 1153224 | +                | /                 | hypothetical protein                                  |
| i02_1129  | CDS  | 1153247 | 1153393 | +                | /                 | hypothetical protein                                  |
| i02_1130  | CDS  | 1153499 | 1153783 | -                | sfaC              | putative F1C and S fimbrial switch regulatory protein |
| i02_1131  | CDS  | 1154139 | 1154468 | +                | sfaB              | putative F1C and S fimbrial switch regulatory protein |
| i02_1132  | CDS  | 1154840 | 1155382 | +                | focA              | F1C major fimbrial subunit precursor                  |
| i02_1133  | CDS  | 1155468 | 1155992 | +                | sfaD              | putative minor F1C fimbrial subunit precursor         |
| i02_1134  | CDS  | 1156033 | 1156728 | +                | focC              | F1C periplasmic chaperone                             |
| i02_1135  | CDS  | 1156750 | 1159428 | +                | focD              | F1C fimbrial usher                                    |
| i02_1136  | CDS  | 1159441 | 1159968 | +                | focF              | F1C minor fimbrial subunit F precursor                |
| i02_1137  | CDS  | 1159990 | 1160493 | +                | focG              | F1C minor fimbrial subunit protein G precursor        |
| i02_1138  | CDS  | 1160444 | 1161454 | +                | focH              | F1C putative fimbrial adhesin precursor               |
| i02_1139  | CDS  | 1161510 | 1161638 | +                | /                 | conserved hypothetical protein                        |
| i02_1140  | CDS  | 1161758 | 1162498 | +                | /                 | hypothetical protein                                  |
| i02_1141  | CDS  | 1162645 | 1163196 | +                | focX              | putative regulatory protein                           |
| i02_1142  | CDS  | 1163522 | 1164559 | -                | /                 | hypothetical protein                                  |
| i02_1143  | CDS  | 1164569 | 1164763 | +                | /                 | hypothetical protein                                  |

| Locus_tag | Type | start   | End     | +/- <sup>a</sup> | Gene <sup>b</sup> | Product                                       |
|-----------|------|---------|---------|------------------|-------------------|-----------------------------------------------|
| i02_1144  | CDS  | 1164789 | 1166966 | +                | iroN              | outer membrane receptor FepA                  |
| i02_1145  | CDS  | 1167011 | 1167967 | -                | iroE              | IroE protein                                  |
| i02_1146  | CDS  | 1168052 | 1169281 | -                | iroD              | ferric enterochelin esterase                  |
| i02_1147  | CDS  | 1169385 | 1173122 | -                | iroC              | ABC transporter ATP-binding protein           |
| i02_1148  | CDS  | 1173184 | 1174347 | -                | iroB              | putative glucosyltransferase                  |
| i02_1149  | CDS  | 1174837 | 1175136 | +                | /                 | hypothetical protein                          |
| i02_1150  | CDS  | 1175263 | 1175772 | +                | /                 | transposase                                   |
| i02_1151  | CDS  | 1175900 | 1176262 | -                | /                 | transposase insG                              |
| i02_1152  | CDS  | 1176278 | 1176433 | -                | /                 | conserved hypothetical protein                |
| i02_1153  | CDS  | 1176953 | 1177315 | +                | /                 | hypothetical protein                          |
| i02_1154  | CDS  | 1177137 | 1177571 | +                | /                 | hypothetical protein                          |
| i02_1155  | CDS  | 1178134 | 1178592 | -                | /                 | putative transposase                          |
| i02_1157  | CDS  | 1178604 | 1179497 | -                | /                 | hypothetical protein                          |
| i02_1158  | CDS  | 1179843 | 1181813 | +                | /                 | Outer membrane heme/hemoglobin receptor       |
| i02_1159  | CDS  | 1181832 | 1182623 | +                | /                 | hypothetical protein                          |
| i02_1160  | CDS  | 1182824 | 1184086 | +                | /                 | hypothetical protein                          |
| i02_1161  | CDS  | 1184193 | 1184375 | -                | /                 | hypothetical protein                          |
| i02_1162  | CDS  | 1185037 | 1186173 | +                | /                 | hypothetical protein                          |
| i02_1163  | CDS  | 1186209 | 1186751 | +                | /                 | hypothetical protein                          |
| i02_1164  | CDS  | 1189125 | 1189421 | -                | /                 | hypothetical protein                          |
| i02_1165  | CDS  | 1189721 | 1190593 | +                | /                 | hypothetical protein                          |
| i02_1166  | CDS  | 1190768 | 1194043 | +                | /                 | antigen 43 precursor                          |
| i02_1167  | CDS  | 1194158 | 1196680 | +                | /                 | hypothetical protein                          |
| i02_1168  | CDS  | 1196756 | 1197211 | +                | /                 | hypothetical protein                          |
| i02_1169  | CDS  | 1197229 | 1197357 | +                | /                 | hypothetical protein                          |
| i02_1170  | CDS  | 1197330 | 1197518 | -                | /                 | hypothetical protein                          |
| i02_1171  | CDS  | 1197622 | 1198443 | +                | /                 | hypothetical protein                          |
| i02_1172  | CDS  | 1197628 | 1198536 | -                | /                 | hypothetical protein                          |
| i02_1173  | CDS  | 1198634 | 1199179 | +                | /                 | hypothetical protein                          |
| i02_1174  | CDS  | 1199195 | 1199671 | +                | /                 | putative radC-like protein yeeS               |
| i02_1175  | CDS  | 1199974 | 1200618 | +                | /                 | hypothetical protein                          |
| i02_1176  | CDS  | 1201089 | 1201469 | +                | /                 | hypothetical protein                          |
| i02_1177  | CDS  | 1201466 | 1201954 | +                | /                 | hypothetical protein                          |
| i02_1178  | CDS  | 1201974 | 1202171 | +                | /                 | hypothetical protein                          |
| i02_1179  | CDS  | 1202256 | 1203083 | +                | /                 | hypothetical protein                          |
| i02_1181  | CDS  | 1203531 | 1204508 | +                | ycdW              | putative 2-hydroxyacid dehydrogenase ycdW     |
| i02_1182  | CDS  | 1204563 | 1205300 | +                | ycdX              | putative hydrolase                            |
| i02_1183  | CDS  | 1205324 | 1205878 | +                | ycdY              | hypothetical protein                          |
| i02_1184  | CDS  | 1205932 | 1206471 | +                | ycdZ              | hypothetical protein                          |
| i02_1185  | CDS  | 1206536 | 1207369 | -                | csgG              | curli production assembly/transport component |
| i02_1186  | CDS  | 1207396 | 1207812 | -                | csgF              | curli assembly protein CsgF                   |
| i02_1187  | CDS  | 1207837 | 1208226 | -                | csgE              | curli assembly protein CsgE                   |
| i02_1188  | CDS  | 1208231 | 1208881 | -                | csgD              | DNA-binding transcriptional regulator CsgD    |
| i02_1189  | CDS  | 1208855 | 1208995 | +                | /                 | hypothetical protein                          |
| i02_1190  | CDS  | 1209406 | 1209540 | -                | /                 | hypothetical protein                          |
| i02_1191  | CDS  | 1209607 | 1210089 | +                | csgB              | curlin minor subunit                          |
| i02_1192  | CDS  | 1210130 | 1210588 | +                | csgA              | cryptic curlin major subunit                  |
| i02_1193  | CDS  | 1210647 | 1210979 | +                | csgC              | putative autoagglutination protein            |
| i02_1194  | CDS  | 1211100 | 1211411 | +                | ymdA              | hypothetical protein                          |
| i02_1195  | CDS  | 1211506 | 1212039 | +                | ymdB              | hypothetical protein                          |
| i02_1196  | CDS  | 1211981 | 1213462 | +                | ymdC              | hypothetical protein                          |
| i02_1197  | CDS  | 1213470 | 1214627 | -                | mdoC              | glucans biosynthesis protein                  |
| i02_1198  | CDS  | 1214672 | 1214815 | -                | /                 | hypothetical protein                          |
| i02_1199  | CDS  | 1215003 | 1216556 | +                | mdoG              | glucan biosynthesis protein G                 |
| i02_1200  | CDS  | 1216519 | 1219092 | +                | mdoH              | glucosyltransferase MdoH                      |
| i02_1201  | CDS  | 1219101 | 1219325 | +                | /                 | hypothetical protein                          |
| i02_1202  | CDS  | 1219264 | 1219491 | +                | yceK              | hypothetical protein                          |
| i02_1203  | CDS  | 1219492 | 1219869 | -                | msyB              | hypothetical protein                          |

| Locus_tag | Type | start   | End     | +/- <sup>a</sup> | Gene <sup>b</sup> | Product                                          |
|-----------|------|---------|---------|------------------|-------------------|--------------------------------------------------|
| i02_1204  | CDS  | 1219949 | 1221175 | -                | yceE              | drug efflux system protein MdtG                  |
| i02_1205  | CDS  | 1221347 | 1222267 | -                | htrB              | lipid A biosynthesis lauroyl acyltransferase     |
| i02_1206  | CDS  | 1222438 | 1223544 | +                | yceA              | hypothetical protein                             |
| i02_1207  | CDS  | 1223586 | 1224161 | -                | yceI              | hypothetical protein                             |
| i02_1208  | CDS  | 1224165 | 1224743 | -                | /                 | cytochrome b561 2                                |
| i02_1209  | CDS  | 1224721 | 1224867 | +                | /                 | hypothetical protein                             |
| i02_1210  | CDS  | 1224993 | 1225130 | -                | /                 | hypothetical protein                             |
| i02_1211  | CDS  | 1225151 | 1226269 | -                | solA              | N-methyltryptophan oxidase                       |
| i02_1212  | CDS  | 1226384 | 1226641 | -                | bssS              | biofilm formation regulatory protein BssS        |
| i02_1213  | CDS  | 1226928 | 1227173 | -                | dinI              | DNA damage-inducible protein I                   |
| i02_1214  | CDS  | 1227247 | 1228293 | -                | pyrC              | dihydroorotase                                   |
| i02_1215  | CDS  | 1228399 | 1229016 | -                | yceB              | hypothetical protein                             |
| i02_1216  | CDS  | 1229093 | 1229740 | -                | grxB              | glutaredoxin 2                                   |
| i02_1217  | CDS  | 1229804 | 1231042 | -                | yceL              | multidrug resistance protein MdtH                |
| i02_1218  | CDS  | 1231248 | 1231832 | +                | rimJ              | ribosomal-protein-S5-alanine                     |
| i02_1219  | CDS  | 1231843 | 1232490 | +                | yceH              | hypothetical protein                             |
| i02_1220  | CDS  | 1232492 | 1233415 | +                | /                 | hypothetical protein                             |
| i02_1221  | CDS  | 1233050 | 1233448 | -                | /                 | hypothetical protein                             |
| i02_1222  | CDS  | 1233525 | 1235060 | +                | mviN              | virulence factor mviN-like protein               |
| i02_1223  | CDS  | 1235100 | 1235516 | -                | flgN              | flagella synthesis protein FlgN                  |
| i02_1224  | CDS  | 1235521 | 1235814 | -                | flgM              | anti-sigma28 factor FlgM                         |
| i02_1225  | CDS  | 1235890 | 1236549 | -                | flgA              | flagellar basal body P-ring biosynthesis protein |
| i02_1226  | CDS  | 1236705 | 1237121 | +                | flgB              | flagellar basal body rod protein FlgB            |
| i02_1227  | CDS  | 1237125 | 1237529 | +                | flgC              | flagellar basal body rod protein FlgC            |
| i02_1228  | CDS  | 1237541 | 1238236 | +                | flgD              | flagellar basal body rod modification protein    |
| i02_1229  | CDS  | 1238261 | 1239466 | +                | flgE              | flagellar hook protein FlgE                      |
| i02_1230  | CDS  | 1239486 | 1240241 | +                | flgF              | flagellar basal body rod protein FlgF            |
| i02_1231  | CDS  | 1240413 | 1241195 | +                | flgG              | flagellar basal body rod protein FlgG            |
| i02_1232  | CDS  | 1241233 | 1241946 | +                | flgH              | flagellar basal body L-ring protein              |
| i02_1233  | CDS  | 1241955 | 1243055 | +                | flgI              | flagellar basal body P-ring protein              |
| i02_1234  | CDS  | 1243055 | 1243996 | +                | flgJ              | flagellar rod assembly protein/muramidase FlgJ   |
| i02_1235  | CDS  | 1244062 | 1245705 | +                | flgK              | flagellar hook-associated protein FlgK           |
| i02_1236  | CDS  | 1245717 | 1246670 | +                | flgL              | flagellar hook-associated protein FlgL           |
| i02_1237  | CDS  | 1246865 | 1250050 | -                | rne               | ribonuclease E                                   |
| i02_1238  | CDS  | 1250131 | 1250505 | +                | /                 | hypothetical protein                             |
| i02_1239  | CDS  | 1250623 | 1251582 | +                | rluC              | 23S rRNA pseudouridylate synthase C              |
| i02_1240  | CDS  | 1251694 | 1252317 | -                | maf               | Maf-like protein                                 |
| i02_1241  | CDS  | 1252290 | 1252418 | -                | /                 | hypothetical protein                             |
| i02_1242  | CDS  | 1252476 | 1252997 | +                | yceD              | hypothetical protein                             |
| i02_1243  | CDS  | 1253049 | 1253222 | +                | /                 | 50S ribosomal protein L32                        |
| i02_1244  | CDS  | 1253303 | 1254373 | +                | plsX              | putative glycerol-3-phosphate acyltransferase    |
| i02_1245  | CDS  | 1254441 | 1255394 | +                | fabH              | 3-oxoacyl-(acyl carrier protein) synthase III    |
| i02_1246  | CDS  | 1255410 | 1256339 | +                | fabD              | acyl carrier protein S-malonyltransferase        |
| i02_1247  | CDS  | 1256352 | 1257086 | +                | /                 | gluconate 5-dehydrogenase                        |
| i02_1248  | CDS  | 1257297 | 1257533 | +                | acpP              | acyl carrier protein                             |
| i02_1249  | CDS  | 1257620 | 1258861 | +                | fabF              | 3-oxoacyl-(acyl carrier protein) synthase II     |
| i02_1250  | CDS  | 1258981 | 1259790 | +                | pabC              | 4-amino-4-deoxychorismate lyase                  |
| i02_1251  | CDS  | 1259793 | 1260815 | +                | yceG              | hypothetical protein                             |
| i02_1252  | CDS  | 1260805 | 1261446 | +                | tmk               | thymidylate kinase                               |
| i02_1253  | CDS  | 1261443 | 1262447 | +                | holB              | DNA polymerase III subunit delta'                |
| i02_1254  | CDS  | 1262458 | 1263255 | +                | ycfH              | putative metallodependent hydrolase              |
| i02_1255  | CDS  | 1263550 | 1264983 | +                | ptsG              | glucose-specific PTS system IIBC components      |
| i02_1256  | CDS  | 1265043 | 1267232 | -                | fhuE              | ferric-rhodotorulic acid outer membrane          |
| i02_1257  | CDS  | 1267265 | 1267435 | -                | /                 | hypothetical protein                             |
| i02_1258  | CDS  | 1267548 | 1267925 | +                | ycfF              | purine nucleoside phosphoramidase                |
| i02_1259  | CDS  | 1267928 | 1268305 | +                | ycfL              | hypothetical protein                             |
| i02_1260  | CDS  | 1268316 | 1268960 | +                | ycfM              | hypothetical protein                             |
| i02_1261  | CDS  | 1268941 | 1269765 | +                | thiK              | thiamine kinase                                  |

| Locus_tag | Type | start   | End     | +/- <sup>a</sup> | Gene <sup>b</sup> | Product                                                      |
|-----------|------|---------|---------|------------------|-------------------|--------------------------------------------------------------|
| i02_1262  | CDS  | 1269776 | 1270801 | +                | nagZ              | beta-hexosaminidase                                          |
| i02_1263  | CDS  | 1270767 | 1271366 | +                | ycfP              | hypothetical protein                                         |
| i02_1264  | CDS  | 1271738 | 1273069 | +                | ndh               | NADH dehydrogenase                                           |
| i02_1265  | CDS  | 1273257 | 1273835 | +                | ycfJ              | hypothetical protein                                         |
| i02_1266  | CDS  | 1273897 | 1274607 | -                | ycfQ              | putative transcriptional regulator YcfQ                      |
| i02_1267  | CDS  | 1274770 | 1275027 | +                | ycfR              | hypothetical protein                                         |
| i02_1268  | CDS  | 1275109 | 1276242 | -                | ycfS              | hypothetical protein                                         |
| i02_1269  | CDS  | 1276214 | 1279723 | -                | mfd               | transcription-repair coupling factor                         |
| i02_1270  | CDS  | 1279788 | 1280861 | -                | ycfT              | hypothetical protein                                         |
| i02_1271  | CDS  | 1281018 | 1281236 | +                | ycfU              | outer membrane-specific lipoprotein transporter subunit LolC |
| i02_1272  | CDS  | 1281122 | 1282321 | +                | lolC              | outer membrane-specific lipoprotein transporter              |
| i02_1273  | CDS  | 1282176 | 1283015 | +                | lolD              | lipoprotein transporter ATP-binding subunit                  |
| i02_1274  | CDS  | 1283015 | 1284259 | +                | lolE              | outer membrane-specific lipoprotein transporter              |
| i02_1275  | CDS  | 1284288 | 1285199 | +                | ycfX              | N-acetyl-D-glucosamine kinase                                |
| i02_1276  | CDS  | 1285215 | 1286036 | +                | cobB              | NAD-dependent deacetylase                                    |
| i02_1277  | CDS  | 1286174 | 1286962 | -                | ycfZ              | hypothetical protein                                         |
| i02_1278  | CDS  | 1286959 | 1287462 | -                | ymfA              | hypothetical protein                                         |
| i02_1279  | CDS  | 1287478 | 1288524 | -                | potD              | spermidine/putrescine ABC transporter                        |
| i02_1280  | CDS  | 1288521 | 1289315 | -                | potC              | spermidine/putrescine ABC transporter membrane               |
| i02_1281  | CDS  | 1289482 | 1290600 | -                | /                 | prophage lambda integrase                                    |
| i02_1282  | CDS  | 1290569 | 1290847 | -                | xisN              | putative excisionase for prophage                            |
| i02_1283  | CDS  | 1290900 | 1293341 | -                | recE              | exodeoxyribonuclease VIII                                    |
| i02_1284  | CDS  | 1293435 | 1293635 | -                | ydfD              | hypothetical protein                                         |
| i02_1285  | CDS  | 1293623 | 1293916 | -                | dicB              | division inhibition protein dicB                             |
| i02_1286  | CDS  | 1293922 | 1294077 | +                | /                 | hypothetical protein                                         |
| i02_1287  | CDS  | 1294116 | 1294415 | +                | /                 | hypothetical protein                                         |
| i02_1288  | CDS  | 1294380 | 1294598 | -                | ydfC              | hypothetical protein                                         |
| i02_1289  | CDS  | 1294628 | 1294798 | -                | ydfB              | hypothetical protein                                         |
| i02_1290  | CDS  | 1294758 | 1294994 | -                | ydfA              | hypothetical protein                                         |
| i02_1291  | CDS  | 1295179 | 1295598 | -                | /                 | hypothetical protein                                         |
| i02_1292  | CDS  | 1295961 | 1296389 | +                | /                 | hypothetical protein                                         |
| i02_1293  | CDS  | 1296455 | 1297525 | +                | /                 | hypothetical protein                                         |
| i02_1294  | CDS  | 1297566 | 1297988 | +                | /                 | hypothetical protein                                         |
| i02_1295  | CDS  | 1297989 | 1298402 | +                | /                 | hypothetical protein                                         |
| i02_1296  | CDS  | 1298496 | 1298678 | +                | /                 | hypothetical protein                                         |
| i02_1297  | CDS  | 1298671 | 1298847 | +                | /                 | hypothetical protein                                         |
| i02_1298  | CDS  | 1299292 | 1299510 | +                | /                 | hypothetical protein                                         |
| i02_1299  | CDS  | 1299963 | 1300094 | +                | /                 | hypothetical protein                                         |
| i02_1300  | CDS  | 1300383 | 1300661 | +                | /                 | hypothetical protein                                         |
| i02_1302  | CDS  | 1300663 | 1301712 | +                | /                 | hypothetical protein                                         |
| i02_1303  | CDS  | 1301725 | 1302081 | +                | /                 | hypothetical protein                                         |
| i02_1304  | CDS  | 1302096 | 1302917 | +                | /                 | cryptic prophage antitermination protein Q                   |
| i02_1305  | CDS  | 1303810 | 1303941 | +                | /                 | hypothetical protein                                         |
| i02_1306  | CDS  | 1304222 | 1304557 | -                | ycgW              | hypothetical protein                                         |
| i02_1307  | CDS  | 1304683 | 1304832 | -                | /                 | hypothetical protein                                         |
| i02_1308  | CDS  | 1304806 | 1305006 | +                | /                 | hypothetical protein                                         |
| i02_1309  | CDS  | 1305003 | 1305164 | +                | /                 | hypothetical protein                                         |
| i02_1310  | CDS  | 1305209 | 1305529 | +                | /                 | lambdoid prophage DLP12 lysis protein S                      |
| i02_1311  | CDS  | 1305534 | 1305878 | +                | ydfR              | hypothetical protein                                         |
| i02_1312  | CDS  | 1305844 | 1306122 | -                | /                 | hypothetical protein                                         |
| i02_1313  | CDS  | 1306222 | 1306755 | +                | /                 | lysozyme from lambdoid prophage Qin                          |
| i02_1314  | CDS  | 1306737 | 1307219 | +                | /                 | putative Rz endopeptidase from lambdoid prophage             |
| i02_1315  | CDS  | 1307207 | 1307359 | +                | /                 | hypothetical protein                                         |
| i02_1316  | CDS  | 1307526 | 1308086 | +                | /                 | hypothetical protein                                         |
| i02_1317  | CDS  | 1308389 | 1308814 | -                | ydfO              | hypothetical protein                                         |
| i02_1318  | CDS  | 1308857 | 1309090 | -                | /                 | hypothetical protein                                         |

| Locus_tag | Type | start   | End     | +/- <sup>a</sup> | Gene <sup>b</sup> | Product                                         |
|-----------|------|---------|---------|------------------|-------------------|-------------------------------------------------|
| i02_1319  | CDS  | 1309256 | 1309363 | +                | /                 | hypothetical protein                            |
| i02_1320  | CDS  | 1309485 | 1309994 | +                | /                 | prophage Qin DNA packaging protein NU1-like     |
| i02_1321  | CDS  | 1309966 | 1311894 | +                | /                 | putative DNA packaging protein of prophage;     |
| i02_1322  | CDS  | 1311878 | 1312084 | +                | /                 | putative DNA packaging protein of prophage      |
| i02_1323  | CDS  | 1312081 | 1313673 | +                | /                 | putative capsid protein of prophage             |
| i02_1324  | CDS  | 1313663 | 1315168 | +                | /                 | putative capsid assembly protein of prophage    |
| i02_1325  | CDS  | 1315205 | 1315552 | +                | /                 | putative capsid protein of prophage             |
| i02_1326  | CDS  | 1315610 | 1316638 | +                | /                 | putative capsid protein of prophage             |
| i02_1327  | CDS  | 1316648 | 1317073 | +                | /                 | hypothetical protein                            |
| i02_1328  | CDS  | 1317066 | 1317419 | +                | /                 | putative head-tail joining protein of prophage  |
| i02_1329  | CDS  | 1317435 | 1317968 | +                | /                 | putative tail component of prophage             |
| i02_1330  | CDS  | 1317965 | 1318360 | +                | /                 | putative tail component of prophage             |
| i02_1331  | CDS  | 1318368 | 1319114 | +                | /                 | putative tail fiber component V of prophage     |
| i02_1332  | CDS  | 1319133 | 1319564 | +                | /                 | putative tail component of prophage             |
| i02_1333  | CDS  | 1319591 | 1320004 | +                | /                 | putative tail component of prophage             |
| i02_1334  | CDS  | 1319985 | 1322546 | +                | /                 | putative tail component of prophage             |
| i02_1335  | CDS  | 1322543 | 1322872 | +                | /                 | putative tail fiber component M of prophage     |
| i02_1336  | CDS  | 1322872 | 1323570 | +                | /                 | putative tail component of prophage             |
| i02_1337  | CDS  | 1323621 | 1324319 | +                | /                 | putative tail fiber component K of prophage     |
| i02_1338  | CDS  | 1324283 | 1324897 | +                | /                 | putative tail assembly protein of cryptic       |
| i02_1339  | CDS  | 1325259 | 1328933 | +                | /                 | putative tail component of prophage             |
| i02_1340  | CDS  | 1329001 | 1329600 | +                | lomP              | putative Lom-like outer membrane protein of     |
| i02_1341  | CDS  | 1329752 | 1331815 | +                | /                 | hypothetical protein                            |
| i02_1342  | CDS  | 1331812 | 1332090 | +                | /                 | hypothetical protein                            |
| i02_1343  | CDS  | 1332100 | 1332393 | +                | /                 | hypothetical protein                            |
| i02_1344  | CDS  | 1332586 | 1333251 | -                | /                 | hypothetical protein                            |
| i02_1345  | CDS  | 1333311 | 1333577 | +                | ylcE              | hypothetical protein                            |
| i02_1346  | CDS  | 1333809 | 1334672 | -                | potB              | spermidine/putrescine ABC transporter membrane  |
| i02_1347  | CDS  | 1334656 | 1335792 | -                | potA              | putrescine/spermidine ABC transporter ATPase    |
| i02_1348  | CDS  | 1335771 | 1336022 | -                | /                 | hypothetical protein                            |
| i02_1349  | CDS  | 1336021 | 1337268 | +                | pepT              | peptidase T                                     |
| i02_1350  | CDS  | 1337317 | 1338447 | -                | ycfD              | hypothetical protein                            |
| i02_1351  | CDS  | 1338514 | 1339974 | -                | phoQ              | sensor protein PhoQ                             |
| i02_1352  | CDS  | 1339974 | 1340645 | -                | phoP              | DNA-binding transcriptional regulator PhoP      |
| i02_1353  | CDS  | 1340815 | 1342185 | -                | purB              | adenylosuccinate lyase                          |
| i02_1354  | CDS  | 1342189 | 1342836 | -                | ycfC              | hypothetical protein                            |
| i02_1355  | CDS  | 1342866 | 1344017 | -                | mnmA              | tRNA-specific 2-thiouridylase MnmA              |
| i02_1356  | CDS  | 1344026 | 1344487 | -                | /                 | putative Nudix hydrolase ymfB                   |
| i02_1357  | CDS  | 1344497 | 1345150 | -                | /                 | hypothetical protein                            |
| i02_1358  | CDS  | 1345070 | 1345192 | +                | /                 | hypothetical protein                            |
| i02_1359  | CDS  | 1345322 | 1346572 | +                | icdA              | isocitrate dehydrogenase                        |
| i02_1360  | CDS  | 1346686 | 1347828 | -                | /                 | prophage lambda integrase                       |
| i02_1361  | CDS  | 1348194 | 1348433 | -                | /                 | hypothetical protein                            |
| i02_1362  | CDS  | 1348459 | 1348827 | -                | /                 | hypothetical protein                            |
| i02_1363  | CDS  | 1348736 | 1349476 | -                | /                 | hypothetical protein                            |
| i02_1364  | CDS  | 1349473 | 1349724 | -                | /                 | hypothetical protein                            |
| i02_1365  | CDS  | 1349684 | 1350244 | -                | /                 | hypothetical protein                            |
| i02_1366  | CDS  | 1350235 | 1350510 | -                | /                 | hypothetical protein                            |
| i02_1367  | CDS  | 1350491 | 1351255 | -                | /                 | hypothetical protein                            |
| i02_1369  | CDS  | 1351572 | 1351853 | -                | /                 | hypothetical protein                            |
| i02_1370  | CDS  | 1351864 | 1351977 | -                | /                 | hypothetical protein                            |
| i02_1371  | CDS  | 1352028 | 1352216 | -                | /                 | hypothetical protein                            |
| i02_1372  | CDS  | 1352207 | 1352887 | -                | /                 | putative exonuclease encoded by prophage        |
| i02_1373  | CDS  | 1352884 | 1353669 | -                | /                 | putative recombination protein Bet of prophage  |
| i02_1374  | CDS  | 1353675 | 1353971 | -                | gamW              | putative host-nuclease inhibitor protein Gam of |
| i02_1375  | CDS  | 1353940 | 1354092 | -                | /                 | hypothetical protein                            |
| i02_1376  | CDS  | 1354159 | 1354323 | -                | /                 | lambda regulatory protein CIII                  |
| i02_1377  | CDS  | 1354396 | 1354764 | -                | /                 | putative single-stranded DNA binding protein of |



| Locus_tag | Type | start   | End     | +/- <sup>a</sup> | Gene <sup>b</sup> | Product                                             |
|-----------|------|---------|---------|------------------|-------------------|-----------------------------------------------------|
| i02_1378  | CDS  | 1354947 | 1355132 | -                | /                 | lambda ant-restriction protein                      |
| i02_1379  | CDS  | 1355361 | 1355942 | +                | /                 | putative superinfection exclusion protein B of      |
| i02_1380  | CDS  | 1355959 | 1356303 | -                | /                 | N protein                                           |
| i02_1381  | CDS  | 1356668 | 1357420 | -                | /                 | hypothetical protein                                |
| i02_1382  | CDS  | 1357417 | 1357974 | -                | /                 | hypothetical protein                                |
| i02_1383  | CDS  | 1358014 | 1358709 | -                | /                 | repressor protein                                   |
| i02_1384  | CDS  | 1358716 | 1359000 | +                | /                 | hypothetical protein                                |
| i02_1385  | CDS  | 1359142 | 1359438 | +                | /                 | putative regulatory protein CII of                  |
| i02_1386  | CDS  | 1359471 | 1360370 | +                | /                 | putative replication protein O of bacteriophage     |
| i02_1387  | CDS  | 1360367 | 1361068 | +                | /                 | putative replication protein P of bacteriophage     |
| i02_1388  | CDS  | 1361065 | 1361355 | +                | /                 | putative exclusion protein ren of prophage          |
| i02_1389  | CDS  | 1361429 | 1361869 | +                | /                 | hypothetical protein                                |
| i02_1390  | CDS  | 1361806 | 1362393 | +                | /                 | putative DNA N-6-adenine-methyltransferase of       |
| i02_1391  | CDS  | 1362527 | 1362910 | +                | /                 | hypothetical protein                                |
| i02_1392  | CDS  | 1363117 | 1363479 | +                | rus               | endodeoxyribonuclease RUS                           |
| i02_1393  | CDS  | 1363476 | 1363616 | +                | /                 | hypothetical protein                                |
| i02_1394  | CDS  | 1363687 | 1364085 | +                | ybcQ              | lambdoid prophage DLP12 antitermination protein     |
| i02_1395  | CDS  | 1364274 | 1365416 | -                | nmpC              | Outer membrane porin protein nmpC precursor         |
| i02_1396  | CDS  | 1365945 | 1366160 | +                | /                 | lambdoid prophage DLP12 lysis protein S             |
| i02_1397  | CDS  | 1366160 | 1366657 | +                | ybcS              | lysozyme from lambdoid prophage DLP12               |
| i02_1398  | CDS  | 1366642 | 1367115 | +                | /                 | putative N-6 endopeptidase from lambdoid prophage   |
| i02_1399  | CDS  | 1367147 | 1367488 | -                | ybcU              | Bor protein homolog from lambdoid prophage DLP12    |
| i02_1400  | CDS  | 1367867 | 1368247 | +                | /                 | partial tonB-like membrane protein encoded          |
| i02_1401  | CDS  | 1368370 | 1368723 | -                | /                 | hypothetical protein                                |
| i02_1403  | CDS  | 1368798 | 1368914 | -                | /                 | hypothetical protein                                |
| i02_1404  | CDS  | 1368863 | 1369117 | +                | nohA2             | prophage Qin DNA packaging protein NU1-like protein |
| i02_1405  | CDS  | 1369199 | 1369747 | +                | nohA              | prophage Qin DNA packaging protein NU1-like protein |
| i02_1406  | CDS  | 1369677 | 1371647 | +                | /                 | putative DNA packaging protein of prophage          |
| i02_1407  | CDS  | 1371631 | 1371837 | +                | /                 | putative DNA packaging protein of prophage          |
| i02_1408  | CDS  | 1371804 | 1373426 | +                | /                 | putative capsid protein of prophage                 |
| i02_1409  | CDS  | 1374958 | 1375305 | +                | /                 | putative capsid protein of prophage                 |
| i02_1410  | CDS  | 1375363 | 1376391 | +                | /                 | putative capsid protein of prophage                 |
| i02_1411  | CDS  | 1376401 | 1376817 | +                | /                 | hypothetical protein                                |
| i02_1412  | CDS  | 1376774 | 1377163 | +                | /                 | putative head-tail joining protein of prophage      |
| i02_1413  | CDS  | 1377175 | 1377753 | +                | /                 | putative tail fiber component Z of prophage         |
| i02_1414  | CDS  | 1377750 | 1378145 | +                | /                 | putative tail component of prophage                 |
| i02_1415  | CDS  | 1378123 | 1378893 | +                | /                 | putative tail component of prophage                 |
| i02_1416  | CDS  | 1378909 | 1379331 | +                | /                 | putative tail component of prophage                 |
| i02_1417  | CDS  | 1379313 | 1379747 | +                | /                 | putative tail component of prophage                 |
| i02_1418  | CDS  | 1379740 | 1382301 | +                | /                 | putative tail component of prophage                 |
| i02_1419  | CDS  | 1382298 | 1382627 | +                | /                 | putative tail component of prophage                 |
| i02_1420  | CDS  | 1382627 | 1383325 | +                | /                 | putative tail component of prophage                 |
| i02_1421  | CDS  | 1383331 | 1384074 | +                | /                 | putative tail component of prophage                 |
| i02_1422  | CDS  | 1383972 | 1384643 | +                | /                 | putative tail component of prophage                 |
| i02_1423  | CDS  | 1384704 | 1388186 | +                | /                 | putative tail component of prophage                 |
| i02_1424  | CDS  | 1388239 | 1390305 | +                | /                 | hypothetical protein                                |
| i02_1425  | CDS  | 1390302 | 1390580 | +                | /                 | hypothetical protein                                |
| i02_1426  | CDS  | 1390593 | 1390886 | +                | /                 | hypothetical protein                                |
| i02_1427  | CDS  | 1390978 | 1391835 | -                | sitD              | SitD protein                                        |
| i02_1428  | CDS  | 1391832 | 1392689 | -                | sitC              | SitC protein                                        |
| i02_1429  | CDS  | 1392686 | 1393513 | -                | sitB              | SitB protein                                        |
| i02_1430  | CDS  | 1393513 | 1394427 | -                | sitA              | SitA protein                                        |
| i02_1431  | CDS  | 1395114 | 1395884 | +                | /                 | hypothetical protein                                |
| i02_1432  | CDS  | 1396770 | 1397174 | -                | ycgX              | hypothetical protein                                |
| i02_1433  | CDS  | 1397395 | 1398126 | -                | ycgE              | putative transcriptional regulator YcgE             |

| Locus_tag | Type | start   | End     | +/- <sup>a</sup> | Gene <sup>b</sup> | Product                                         |
|-----------|------|---------|---------|------------------|-------------------|-------------------------------------------------|
| i02_1434  | CDS  | 1398036 | 1398188 | -                | /                 | hypothetical protein                            |
| i02_1435  | CDS  | 1398331 | 1399620 | -                | ycgF              | hypothetical protein                            |
| i02_1436  | CDS  | 1399856 | 1400092 | +                | ycgZ              | hypothetical protein                            |
| i02_1437  | CDS  | 1400135 | 1400407 | +                | /                 | hypothetical protein                            |
| i02_1438  | CDS  | 1400436 | 1400702 | +                | ymgB              | hypothetical protein                            |
| i02_1439  | CDS  | 1400887 | 1401063 | +                | /                 | hypothetical protein                            |
| i02_1440  | CDS  | 1401403 | 1402254 | +                | /                 | hypothetical protein                            |
| i02_1441  | CDS  | 1402350 | 1402604 | +                | /                 | hypothetical protein                            |
| i02_1442  | CDS  | 1403002 | 1403181 | +                | /                 | hypothetical protein                            |
| i02_1443  | CDS  | 1403197 | 1403334 | +                | /                 | conserved hypothetical protein                  |
| i02_1444  | CDS  | 1403471 | 1403554 | +                | /                 | hypothetical protein                            |
| i02_1445  | CDS  | 1403665 | 1403847 | +                | /                 | hypothetical protein                            |
| i02_1446  | CDS  | 1403993 | 1404520 | +                | /                 | hypothetical protein                            |
| i02_1447  | CDS  | 1404578 | 1404898 | -                | ymgD              | hypothetical protein                            |
| i02_1448  | CDS  | 1404917 | 1405261 | -                | /                 | hypothetical protein                            |
| i02_1449  | CDS  | 1405263 | 1405436 | -                | /                 | hypothetical protein                            |
| i02_1450  | CDS  | 1405854 | 1406180 | +                | /                 | hypothetical protein                            |
| i02_1451  | CDS  | 1406226 | 1406411 | +                | /                 | hypothetical protein                            |
| i02_1452  | CDS  | 1406553 | 1406819 | -                | minE              | cell division topological specificity factor    |
| i02_1453  | CDS  | 1406823 | 1407635 | -                | minD              | cell division inhibitor MinD                    |
| i02_1454  | CDS  | 1407659 | 1408354 | -                | minC              | septum formation inhibitor                      |
| i02_1455  | CDS  | 1408494 | 1408721 | +                | /                 | hypothetical protein                            |
| i02_1456  | CDS  | 1408874 | 1409242 | +                | ycgJ              | hypothetical protein                            |
| i02_1457  | CDS  | 1409362 | 1409763 | -                | ycgK              | hypothetical protein                            |
| i02_1458  | CDS  | 1409972 | 1410298 | +                | ycgL              | hypothetical protein                            |
| i02_1459  | CDS  | 1410370 | 1411029 | +                | /                 | hypothetical protein                            |
| i02_1460  | CDS  | 1411121 | 1411567 | +                | ycgN              | hypothetical protein                            |
| i02_1461  | CDS  | 1411774 | 1412055 | -                | /                 | hypothetical protein                            |
| i02_1462  | CDS  | 1412360 | 1412779 | +                | umuD              | DNA polymerase V subunit UmuD                   |
| i02_1463  | CDS  | 1412779 | 1414047 | +                | umuC              | DNA polymerase V subunit UmuC                   |
| i02_1464  | CDS  | 1414092 | 1414628 | -                | dsbB              | disulfide bond formation protein B              |
| i02_1465  | CDS  | 1414768 | 1416309 | -                | nhaB              | sodium/proton antiporter                        |
| i02_1466  | CDS  | 1416531 | 1417250 | +                | fadR              | fatty acid metabolism regulator                 |
| i02_1467  | CDS  | 1417238 | 1417363 | -                | /                 | hypothetical protein                            |
| i02_1468  | CDS  | 1417413 | 1418945 | -                | ycgB              | SpoVR family protein                            |
| i02_1469  | CDS  | 1419269 | 1420573 | +                | dadA              | D-amino acid dehydrogenase small subunit        |
| i02_1470  | CDS  | 1420583 | 1421653 | +                | dadX              | alanine racemase                                |
| i02_1471  | CDS  | 1421710 | 1423446 | -                | ycgO              | potassium/proton antiporter                     |
| i02_1472  | CDS  | 1423541 | 1424455 | -                | ldcA              | L,D-carboxypeptidase A                          |
| i02_1473  | CDS  | 1424441 | 1425166 | +                | mltE              | membrane-bound lytic murein transglycosylase E  |
| i02_1474  | CDS  | 1425168 | 1425902 | -                | ycgR              | hypothetical protein                            |
| i02_1475  | CDS  | 1426070 | 1426357 | +                | ymgE              | transglycosylase associated protein             |
| i02_1476  | CDS  | 1426407 | 1428398 | -                | prpA              | outer membrane receptor                         |
| i02_1477  | CDS  | 1428403 | 1429257 | -                | modD              | molybdenum transport protein ModD               |
| i02_1478  | CDS  | 1429254 | 1430066 | -                | /                 | hypothetical protein                            |
| i02_1479  | CDS  | 1430076 | 1430972 | -                | /                 | putative iron compound ABC transporter,         |
| i02_1480  | CDS  | 1430831 | 1431811 | -                | fecD              | Iron(III) dicitrate transport system permease   |
| i02_1481  | CDS  | 1431811 | 1432833 | -                | /                 | hypothetical protein                            |
| i02_1482  | CDS  | 1432901 | 1433026 | -                | /                 | hypothetical protein                            |
| i02_1483  | CDS  | 1433164 | 1434861 | -                | treA              | trehalase                                       |
| i02_1484  | CDS  | 1434806 | 1435021 | +                | /                 | hypothetical protein                            |
| i02_1485  | CDS  | 1435040 | 1435153 | -                | /                 | hypothetical protein                            |
| i02_1486  | CDS  | 1435180 | 1436604 | -                | ycgC              | dihydroxyacetone kinase subunit M               |
| i02_1487  | CDS  | 1436609 | 1437319 | -                | /                 | dihydroxyacetone kinase ADP-binding subunit     |
| i02_1488  | CDS  | 1437252 | 1438352 | -                | ycgT              | dihydroxyacetone kinase subunit DhaK            |
| i02_1489  | CDS  | 1438541 | 1440469 | +                | /                 | DNA-binding transcriptional regulator DhaR      |
| i02_1490  | CDS  | 1440506 | 1440736 | -                | /                 | hypothetical protein                            |
| i02_1491  | CDS  | 1440874 | 1441965 | -                | yehF              | GTP-dependent nucleic acid-binding protein EngD |

| Locus_tag | Type | start   | End     | +/- <sup>a</sup> | Gene <sup>b</sup> | Product                                             |
|-----------|------|---------|---------|------------------|-------------------|-----------------------------------------------------|
| i02_1492  | CDS  | 1442082 | 1442666 | -                | pth               | peptidyl-tRNA hydrolase                             |
| i02_1493  | CDS  | 1442944 | 1443222 | +                | ychH              | hypothetical protein                                |
| i02_1494  | CDS  | 1443277 | 1444956 | -                | ychM              | putative sulfate transporter YchM                   |
| i02_1495  | CDS  | 1445081 | 1446094 | -                | prsA              | ribose-phosphate pyrophosphokinase                  |
| i02_1496  | CDS  | 1446179 | 1447030 | -                | ipk               | 4-diphosphocytidyl-2-C-methylerythritol kinase      |
| i02_1497  | CDS  | 1447030 | 1447719 | -                | lolB              | outer membrane lipoprotein LolB                     |
| i02_1498  | CDS  | 1447867 | 1449123 | +                | hemA              | glutamyl-tRNA reductase                             |
| i02_1499  | CDS  | 1449165 | 1450247 | +                | prfA              | peptide chain release factor 1                      |
| i02_1500  | CDS  | 1450247 | 1451080 | +                | hemK              | N5-glutamine S-adenosyl-L-methionine-dependent      |
| i02_1501  | CDS  | 1451077 | 1451469 | +                | /                 | putative transcriptional regulator                  |
| i02_1502  | CDS  | 1451473 | 1452282 | +                | ychA              | putative transcriptional regulator                  |
| i02_1503  | CDS  | 1452318 | 1453172 | +                | kdsA              | 2-dehydro-3-deoxyphosphooctonate aldolase           |
| i02_1504  | CDS  | 1453321 | 1453599 | -                | /                 | hypothetical protein                                |
| i02_1505  | CDS  | 1453633 | 1453752 | -                | /                 | hypothetical protein                                |
| i02_1506  | CDS  | 1453838 | 1455025 | -                | chaA              | calcium/sodium:proton antiporter                    |
| i02_1507  | CDS  | 1455208 | 1455438 | +                | chaB              | cation transport regulator                          |
| i02_1508  | CDS  | 1455548 | 1456279 | +                | chaC              | cation transport protein chaC                       |
| i02_1509  | CDS  | 1456323 | 1456676 | -                | ychN              | hypothetical protein                                |
| i02_1510  | CDS  | 1456861 | 1458255 | +                | ychP              | hypothetical protein                                |
| i02_1511  | CDS  | 1458256 | 1458972 | -                | narL              | transcriptional regulator NarL                      |
| i02_1512  | CDS  | 1458899 | 1460695 | -                | narX              | nitrate/nitrite sensor protein NarX                 |
| i02_1513  | CDS  | 1460721 | 1460939 | +                | /                 | hypothetical protein                                |
| i02_1514  | CDS  | 1461028 | 1462425 | +                | narK              | nitrite extrusion protein 1                         |
| i02_1515  | CDS  | 1462818 | 1466561 | +                | narG              | respiratory nitrate reductase 1 alpha chain         |
| i02_1516  | CDS  | 1466558 | 1468096 | +                | narH              | respiratory nitrate reductase 1 beta chain          |
| i02_1517  | CDS  | 1468093 | 1468803 | +                | narJ              | respiratory nitrate reductase 1 delta chain         |
| i02_1518  | CDS  | 1468803 | 1469480 | +                | narI              | respiratory nitrate reductase 1 gamma chain         |
| i02_1519  | CDS  | 1469556 | 1470599 | +                | /                 | hypothetical protein                                |
| i02_1520  | CDS  | 1470596 | 1471612 | +                | /                 | hypothetical protein                                |
| i02_1521  | CDS  | 1471590 | 1472396 | +                | /                 | putative gumP-like protein                          |
| i02_1522  | CDS  | 1472393 | 1473679 | +                | /                 | hypothetical protein                                |
| i02_1523  | CDS  | 1473664 | 1474278 | +                | /                 | hypothetical protein                                |
| i02_1524  | CDS  | 1474271 | 1475395 | +                | /                 | hypothetical protein                                |
| i02_1525  | CDS  | 1475382 | 1476473 | +                | /                 | hypothetical protein                                |
| i02_1527  | CDS  | 1477030 | 1477872 | -                | purU              | formyltetrahydrofolate deformylase                  |
| i02_1528  | CDS  | 1477922 | 1478380 | -                | ychJ              | hypothetical protein                                |
| i02_1529  | CDS  | 1478454 | 1479398 | +                | ychK              | hypothetical protein                                |
| i02_1530  | CDS  | 1479490 | 1480503 | +                | hnr               | response regulator of RpoS                          |
| i02_1531  | CDS  | 1480705 | 1481613 | +                | galU              | UTP--glucose-1-phosphate uridylyltransferase        |
| i02_1532  | CDS  | 1481757 | 1482170 | -                | hns               | global DNA-binding transcriptional factor           |
| i02_1533  | CDS  | 1482262 | 1482390 | -                | /                 | hypothetical protein                                |
| i02_1534  | CDS  | 1482774 | 1483391 | +                | tdk               | thymidine kinase                                    |
| i02_1535  | CDS  | 1483518 | 1484723 | -                | /                 | transposase insG                                    |
| i02_1537  | CDS  | 1484849 | 1487524 | -                | adhE              | bifunctional acetaldehyde-CoA/alcohol dehydrogenase |
| i02_1538  | CDS  | 1488001 | 1488648 | +                | ychE              | hypothetical protein                                |
| i02_1539  | CDS  | 1488806 | 1489102 | -                | /                 | hypothetical protein                                |
| i02_1540  | CDS  | 1489314 | 1491017 | +                | oppA              | periplasmic oligopeptide-binding protein            |
| i02_1541  | CDS  | 1491103 | 1492023 | +                | oppB              | oligopeptide transporter permease                   |
| i02_1542  | CDS  | 1492038 | 1492946 | +                | oppC              | oligopeptide transport system permease protein      |
| i02_1543  | CDS  | 1492958 | 1493971 | +                | oppD              | oligopeptide transporter ATP-binding component      |
| i02_1544  | CDS  | 1493968 | 1494972 | +                | oppF              | oligopeptide transport ATP-binding protein oppF     |
| i02_1545  | CDS  | 1495025 | 1495432 | -                | yciU              | dsDNA-mimic protein                                 |
| i02_1546  | CDS  | 1495389 | 1496849 | -                | cls               | cardiolipin synthetase                              |
| i02_1547  | CDS  | 1496881 | 1497165 | +                | /                 | hypothetical protein                                |
| i02_1548  | CDS  | 1497220 | 1498491 | -                | kch               | voltage-gated potassium channel                     |
| i02_1549  | CDS  | 1498773 | 1499069 | -                | ycil              | Ycil-like protein                                   |
| i02_1550  | CDS  | 1499242 | 1500009 | +                | tonB              | transport protein TonB                              |

| Locus_tag | Type   | start   | End     | +/- <sup>a</sup> | Gene <sup>b</sup> | Product                                                                                |
|-----------|--------|---------|---------|------------------|-------------------|----------------------------------------------------------------------------------------|
| i02_1551  | CDS    | 1500049 | 1500447 | -                | yciA              | acyl-CoA thioester hydrolase                                                           |
| i02_1552  | CDS    | 1500552 | 1501091 | -                | ispZ              | intracellular septation protein A                                                      |
| i02_1553  | CDS    | 1501121 | 1501864 | -                | yciC              | hypothetical protein                                                                   |
| i02_1554  | CDS    | 1502143 | 1502859 | +                | ompW              | outer membrane protein W                                                               |
| i02_1555  | CDS    | 1502918 | 1503424 | -                | yciE              | hypothetical protein                                                                   |
| i02_1556  | CDS    | 1503470 | 1503973 | -                | yciF              | hypothetical protein                                                                   |
| i02_1557  | CDS    | 1504297 | 1505103 | -                | trpA              | tryptophan synthase subunit alpha                                                      |
| i02_1558  | CDS    | 1505103 | 1506296 | -                | trpB              | tryptophan synthase subunit beta                                                       |
| i02_1559  | CDS    | 1506308 | 1507666 | -                | trpC              | bifunctional indole-3-glycerol phosphate synthase/phosphoribosylanthranilate isomerase |
| i02_1560  | CDS    | 1507670 | 1509265 | -                | trpD              | bifunctional glutamine                                                                 |
| i02_1561  | CDS    | 1509265 | 1510827 | -                | trpE              | anthranilate synthase component I                                                      |
| i02_1562  | CDS    | 1511101 | 1511982 | +                | trpH              | protein trpH                                                                           |
| i02_1563  | CDS    | 1511943 | 1512599 | +                | yciO              | hypothetical protein                                                                   |
| i02_1564  | CDS    | 1512624 | 1514516 | +                | yciQ              | hypothetical protein                                                                   |
| i02_1565  | CDS    | 1514729 | 1515604 | +                | yciL              | 23S rRNA pseudouridylylase synthase B                                                  |
| i02_1566  | CDS    | 1515644 | 1516234 | -                | btuR              | cobinamide adenosyltransferase / cobalamin adenosyltransferase                         |
| i02_1567  | CDS    | 1516231 | 1516989 | -                | yciK              | short chain dehydrogenase                                                              |
| i02_1568  | CDS    | 1517209 | 1518258 | +                | sohB              | putative periplasmic protease                                                          |
| i02_1569  | CDS    | 1518294 | 1518545 | -                | yciN              | hypothetical protein                                                                   |
| i02_1570  | CDS    | 1518538 | 1518693 | +                | /                 | hypothetical protein                                                                   |
| i02_1571  | CDS    | 1518883 | 1521522 | +                | topA              | DNA topoisomerase I                                                                    |
| i02_1572  | CDS    | 1521732 | 1522706 | +                | cysB              | transcriptional regulator CysB                                                         |
| i02_1573  | CDS    | 1523001 | 1523165 | +                | /                 | hypothetical protein                                                                   |
| i02_1574  | CDS    | 1523147 | 1523335 | +                | /                 | hypothetical protein                                                                   |
| i02_1575  | CDS    | 1523694 | 1526369 | +                | acnA              | aconitate hydratase                                                                    |
| i02_1576  | CDS    | 1526433 | 1527086 | -                | ribA              | GTP cyclohydrolase II                                                                  |
| i02_1577  | CDS    | 1527193 | 1527957 | +                | pgpB              | phosphatidylglycerophosphatase B                                                       |
| i02_1578  | CDS    | 1528106 | 1528414 | +                | yciS              | hypothetical protein                                                                   |
| i02_1579  | CDS    | 1528448 | 1529590 | +                | yciM              | tetratricopeptide repeat protein                                                       |
| i02_1580  | pseudo | 1529630 | 1530427 | +                | pyrF              | orotidine 5'-phosphate decarboxylase                                                   |
| i02_1581  | CDS    | 1530515 | 1530844 | +                | yciH              | translation initiation factor Sui1                                                     |
| i02_1582  | CDS    | 1530868 | 1531020 | +                | /                 | hypothetical protein                                                                   |
| i02_1583  | CDS    | 1530970 | 1531188 | -                | osmB              | lipoprotein                                                                            |
| i02_1584  | CDS    | 1531457 | 1532206 | -                | yciT              | putative transcriptional regulator YciT                                                |
| i02_1585  | CDS    | 1532295 | 1532468 | -                | /                 | hypothetical protein                                                                   |
| i02_1586  | CDS    | 1532616 | 1534601 | -                | yciR              | RNase II stability modulator                                                           |
| i02_1587  | CDS    | 1534835 | 1536769 | -                | rnb               | exoribonuclease II                                                                     |
| i02_1588  | CDS    | 1536837 | 1537964 | -                | yciW              | hypothetical protein                                                                   |
| i02_1589  | CDS    | 1538109 | 1538897 | -                | fabI              | enoyl-(acyl carrier protein) reductase                                                 |
| i02_1590  | CDS    | 1539276 | 1539941 | +                | /                 | putative transcriptional repressor                                                     |
| i02_1591  | CDS    | 1540057 | 1541211 | +                | /                 | acriflavin resistance protein A                                                        |
| i02_1593  | pseudo | 1541211 | 1544317 | +                | /                 | acriflavin resistance protein B                                                        |
| i02_1594  | CDS    | 1544321 | 1545694 | +                | /                 | partial putative outer membrane channel protein                                        |
| i02_1595  | CDS    | 1545703 | 1546866 | +                | /                 | membrane transporter                                                                   |
| i02_1596  | CDS    | 1546914 | 1547720 | -                | sapF              | peptide transport system ATP-binding protein                                           |
| i02_1597  | CDS    | 1547722 | 1548714 | -                | sapD              | peptide transport system ATP-binding protein                                           |
| i02_1598  | CDS    | 1548714 | 1549604 | -                | sapC              | peptide transport system permease protein sapC                                         |
| i02_1599  | CDS    | 1549591 | 1550556 | -                | sapB              | peptide transport system permease protein sapB                                         |
| i02_1600  | CDS    | 1550553 | 1552196 | -                | sapA              | peptide transport periplasmic protein sapA                                             |
| i02_1601  | CDS    | 1552509 | 1552754 | -                | ymjA              | hypothetical protein                                                                   |
| i02_1602  | CDS    | 1553181 | 1554173 | -                | pspF              | phage shock protein                                                                    |
| i02_1603  | CDS    | 1554324 | 1554992 | +                | pspA              | phage shock protein PspA                                                               |
| i02_1604  | CDS    | 1555046 | 1555270 | +                | pspB              | phage shock protein B                                                                  |
| i02_1605  | CDS    | 1555270 | 1555629 | +                | pspC              | DNA-binding transcriptional activator PspC                                             |
| i02_1606  | CDS    | 1555638 | 1555859 | +                | pspD              | peripheral inner membrane phage-shock protein                                          |
| i02_1607  | CDS    | 1555934 | 1556248 | +                | pspE              | thiosulfate:cyanide sulfurtransferase                                                  |

| Locus_tag | Type   | start   | End     | +/- <sup>a</sup> | Gene <sup>b</sup> | Product                                              |
|-----------|--------|---------|---------|------------------|-------------------|------------------------------------------------------|
| i02_1608  | CDS    | 1556435 | 1558141 | +                | ycjM              | putative sucrose phosphorylase                       |
| i02_1609  | CDS    | 1558155 | 1559447 | +                | ycjN              | ABC transporter periplasmic-binding protein          |
| i02_1610  | CDS    | 1559468 | 1560349 | +                | ycjO              | ABC transporter permease                             |
| i02_1611  | CDS    | 1560336 | 1561178 | +                | ycjP              | ABC transporter permease                             |
| i02_1612  | CDS    | 1561209 | 1562261 | +                | ycjQ              | hypothetical protein                                 |
| i02_1613  | CDS    | 1562271 | 1563068 | +                | ycjR              | hypothetical protein                                 |
| i02_1614  | CDS    | 1563078 | 1564133 | +                | ycjS              | oxidoreductase ycjS                                  |
| i02_1615  | CDS    | 1564130 | 1566397 | +                | ycjT              | putative transport protein YcjT                      |
| i02_1616  | CDS    | 1566394 | 1567053 | +                | ycjU              | putative beta-phosphoglucomutase                     |
| i02_1617  | CDS    | 1567067 | 1568149 | +                | ycjV              | ABC transporter ATP-binding protein                  |
| i02_1618  | CDS    | 1568143 | 1569099 | +                | ompG              | Outer membrane protein G precursor                   |
| i02_1619  | CDS    | 1569150 | 1570148 | -                | ycjW              | putative transcriptional regulator YcjW              |
| i02_1620  | CDS    | 1570232 | 1571701 | +                | ycjX              | hypothetical protein                                 |
| i02_1621  | CDS    | 1571698 | 1572759 | +                | ycjF              | hypothetical protein                                 |
| i02_1622  | CDS    | 1572880 | 1574448 | +                | tyrR              | DNA-binding transcriptional regulator TyrR           |
| i02_1623  | CDS    | 1574492 | 1574998 | -                | tpx               | thiol peroxidase                                     |
| i02_1624  | CDS    | 1575075 | 1576082 | +                | ycjG              | hypothetical protein                                 |
| i02_1625  | pseudo | 1576057 | 1576785 | -                | ycjI              | murein peptide amidase A                             |
| i02_1626  | CDS    | 1577076 | 1577714 | -                | /                 | hypothetical protein                                 |
| i02_1627  | CDS    | 1577785 | 1578717 | -                | /                 | hypothetical protein                                 |
| i02_1628  | CDS    | 1578843 | 1579742 | +                | /                 | putative transcriptional regulator YcjZ              |
| i02_1629  | CDS    | 1580058 | 1581692 | +                | mppA              | periplasmic murein peptide-binding protein           |
| i02_1630  | CDS    | 1581743 | 1582774 | -                | ynaI              | hypothetical protein                                 |
| i02_1631  | CDS    | 1583018 | 1583275 | +                | ynaJ              | hypothetical protein                                 |
| i02_1632  | CDS    | 1583325 | 1584275 | -                | ydaA              | universal stress protein UspE                        |
| i02_1633  | CDS    | 1584427 | 1585221 | -                | fnr               | fumarate/nitrate reduction transcriptional regulator |
| i02_1634  | CDS    | 1585374 | 1585889 | -                | ogt               | O-6-alkylguanine-DNA:cysteine-protein                |
| i02_1635  | CDS    | 1585900 | 1586091 | -                | /                 | hypothetical protein                                 |
| i02_1636  | CDS    | 1586402 | 1587217 | -                | /                 | hypothetical protein                                 |
| i02_1637  | CDS    | 1587311 | 1587619 | +                | /                 | hypothetical protein                                 |
| i02_1638  | CDS    | 1587604 | 1588002 | +                | /                 | hypothetical protein                                 |
| i02_1639  | CDS    | 1588197 | 1588760 | +                | ydaL              | hypothetical protein                                 |
| i02_1640  | CDS    | 1588781 | 1590073 | -                | ydaM              | hypothetical protein                                 |
| i02_1641  | CDS    | 1590268 | 1591251 | +                | zntB              | zinc transporter                                     |
| i02_1642  | CDS    | 1591729 | 1593102 | +                | dbpA              | ATP-dependent RNA helicase DbpA                      |
| i02_1643  | CDS    | 1593231 | 1594166 | -                | ydaO              | C32 tRNA thiolase                                    |
| i02_1644  | CDS    | 1594218 | 1594526 | -                | /                 | hypothetical protein                                 |
| i02_1645  | CDS    | 1596035 | 1596403 | -                | /                 | hypothetical protein                                 |
| i02_1646  | CDS    | 1596492 | 1596998 | -                | ynaF              | hypothetical protein                                 |
| i02_1647  | CDS    | 1597067 | 1598200 | -                | ompN              | Outer membrane protein N precursor                   |
| i02_1648  | CDS    | 1598566 | 1602090 | -                | ydbK              | pyruvate-flavodoxin oxidoreductase                   |
| i02_1649  | CDS    | 1602161 | 1602601 | -                | /                 | hypothetical protein                                 |
| i02_1650  | CDS    | 1602475 | 1602630 | +                | /                 | hypothetical protein                                 |
| i02_1651  | CDS    | 1602627 | 1603061 | -                | hslJ              | heat-inducible protein                               |
| i02_1652  | CDS    | 1603160 | 1604149 | -                | ldhA              | D-lactate dehydrogenase                              |
| i02_1653  | CDS    | 1604357 | 1606996 | +                | ydbH              | hypothetical protein                                 |
| i02_1654  | CDS    | 1606993 | 1607178 | +                | ynbE              | hypothetical protein                                 |
| i02_1655  | CDS    | 1607111 | 1607512 | +                | ydbL              | hypothetical protein                                 |
| i02_1656  | CDS    | 1607905 | 1613778 | +                | /                 | possible autotransporter/adhesin                     |
| i02_1657  | CDS    | 1613997 | 1614857 | +                | ydbC              | putative oxidoreductase                              |
| i02_1658  | CDS    | 1614902 | 1615126 | -                | /                 | hypothetical protein                                 |
| i02_1659  | CDS    | 1615156 | 1615761 | +                | ynbA              | hypothetical protein                                 |
| i02_1660  | CDS    | 1615761 | 1616657 | +                | ynbB              | hypothetical protein                                 |
| i02_1661  | CDS    | 1616673 | 1618430 | +                | ynbC              | hypothetical protein                                 |
| i02_1662  | CDS    | 1618345 | 1619736 | +                | ynbD              | hypothetical protein                                 |
| i02_1663  | CDS    | 1619790 | 1620395 | -                | acpD              | azoreductase                                         |
| i02_1664  | CDS    | 1620596 | 1624498 | +                | hrpA              | ATP-dependent RNA helicase HrpA                      |
| i02_1665  | CDS    | 1624771 | 1625571 | +                | ydcF              | hypothetical protein                                 |

| Locus_tag | Type | start   | End     | +/- <sup>a</sup> | Gene <sup>b</sup> | Product                                     |
|-----------|------|---------|---------|------------------|-------------------|---------------------------------------------|
| i02_1666  | CDS  | 1625768 | 1627207 | +                | aldA              | aldehyde dehydrogenase A                    |
| i02_1667  | CDS  | 1627249 | 1628250 | -                | /                 | glyceraldehyde 3-phosphate dehydrogenase A  |
| i02_1668  | CDS  | 1628439 | 1628969 | +                | cybB              | cytochrome b561                             |
| i02_1669  | CDS  | 1629214 | 1629387 | +                | ydcA              | hypothetical protein                        |
| i02_1670  | CDS  | 1629547 | 1630014 | +                | /                 | hypothetical protein                        |
| i02_1671  | CDS  | 1630052 | 1631116 | -                | ydcI              | putative transcriptional regulator YdcI     |
| i02_1672  | CDS  | 1631192 | 1632535 | +                | ydcJ              | hypothetical protein                        |
| i02_1673  | CDS  | 1632760 | 1634415 | +                | mdoD              | glucan biosynthesis protein D               |
| i02_1674  | CDS  | 1634549 | 1634779 | +                | ydcH              | hypothetical protein                        |
| i02_1675  | CDS  | 1634827 | 1635381 | +                | rimL              | ribosomal-protein-L7/L12-serine             |
| i02_1676  | CDS  | 1635373 | 1636353 | -                | ydcK              | hypothetical protein                        |
| i02_1677  | CDS  | 1636369 | 1637469 | +                | tehA              | potassium-tellurite ethidium and proflavin  |
| i02_1678  | CDS  | 1637466 | 1638059 | +                | tehB              | tellurite resistance protein TehB           |
| i02_1679  | CDS  | 1638211 | 1638330 | +                | /                 | hypothetical protein                        |
| i02_1680  | CDS  | 1638362 | 1639030 | +                | ydcL              | lipoprotein ydcL precursor                  |
| i02_1681  | CDS  | 1639065 | 1640360 | -                | ydcO              | hypothetical protein                        |
| i02_1682  | CDS  | 1640329 | 1640865 | +                | ydcN              | hypothetical protein                        |
| i02_1683  | CDS  | 1640896 | 1642899 | +                | ydcP              | putative protease ydcP precursor            |
| i02_1684  | CDS  | 1642991 | 1643221 | -                | yncJ              | hypothetical protein                        |
| i02_1685  | CDS  | 1643278 | 1643406 | -                | /                 | hypothetical protein                        |
| i02_1686  | CDS  | 1643433 | 1643636 | +                | /                 | hypothetical protein                        |
| i02_1687  | CDS  | 1643715 | 1645121 | +                | ydcR              | hypothetical protein                        |
| i02_1688  | CDS  | 1645366 | 1646511 | +                | ydcS              | ABC transporter periplasmic-binding protein |
| i02_1689  | CDS  | 1646529 | 1647542 | +                | ydcT              | ABC transporter ATP-binding protein         |
| i02_1690  | CDS  | 1647543 | 1648484 | +                | ydcU              | ABC transporter permease                    |
| i02_1691  | CDS  | 1648474 | 1649268 | +                | ydcV              | ABC transporter permease                    |
| i02_1692  | CDS  | 1649290 | 1650714 | +                | ydcW              | gamma-aminobutyraldehyde dehydrogenase      |
| i02_1693  | CDS  | 1650711 | 1650827 | -                | /                 | hypothetical protein                        |
| i02_1694  | CDS  | 1650903 | 1651181 | -                | /                 | hypothetical protein                        |
| i02_1695  | CDS  | 1651026 | 1651274 | +                | /                 | hypothetical protein                        |
| i02_1696  | CDS  | 1651360 | 1651593 | +                | ydc               | hypothetical protein                        |
| i02_1697  | CDS  | 1651594 | 1652043 | -                | ydcZ              | hypothetical protein                        |
| i02_1698  | CDS  | 1652040 | 1652621 | -                | yncA              | acetyltransferase yncA                      |
| i02_1699  | CDS  | 1652551 | 1652892 | +                | /                 | hypothetical protein                        |
| i02_1700  | CDS  | 1652765 | 1653001 | +                | /                 | hypothetical protein                        |
| i02_1701  | CDS  | 1653039 | 1655141 | -                | yncD              | iron outer membrane transporter             |
| i02_1702  | CDS  | 1655383 | 1656444 | +                | yncE              | hypothetical protein                        |
| i02_1703  | CDS  | 1656557 | 1658107 | -                | ansP              | L-asparagine permease                       |
| i02_1704  | CDS  | 1658323 | 1658499 | +                | /                 | hypothetical protein                        |
| i02_1705  | CDS  | 1658612 | 1658941 | +                | /                 | hypothetical protein                        |
| i02_1706  | CDS  | 1659361 | 1659510 | -                | /                 | hypothetical protein                        |
| i02_1707  | CDS  | 1659482 | 1659766 | +                | /                 | hypothetical protein                        |
| i02_1708  | CDS  | 1659785 | 1661743 | +                | /                 | hypothetical protein                        |
| i02_1709  | CDS  | 1661875 | 1662582 | +                | /                 | hypothetical protein                        |
| i02_1710  | CDS  | 1662919 | 1664154 | +                | /                 | hypothetical protein                        |
| i02_1711  | CDS  | 1664165 | 1665208 | +                | /                 | hypothetical protein                        |
| i02_1712  | CDS  | 1665320 | 1665604 | +                | /                 | hypothetical protein                        |
| i02_1713  | CDS  | 1665623 | 1668028 | +                | /                 | hypothetical protein                        |
| i02_1714  | CDS  | 1668015 | 1668617 | +                | /                 | hypothetical protein                        |
| i02_1715  | CDS  | 1668955 | 1669407 | +                | /                 | hypothetical protein                        |
| i02_1717  | CDS  | 1669626 | 1670597 | +                | /                 | hypothetical protein                        |
| i02_1718  | CDS  | 1670710 | 1670853 | +                | /                 | hypothetical protein                        |
| i02_1719  | CDS  | 1670931 | 1671146 | +                | /                 | hypothetical protein                        |
| i02_1720  | CDS  | 1671463 | 1672032 | -                | yddH              | hypothetical protein                        |
| i02_1721  | CDS  | 1672207 | 1673052 | +                | nhoA              | N-hydroxyarylamine O-acetyltransferase      |
| i02_1722  | CDS  | 1673148 | 1674041 | -                | yddE              | hypothetical protein                        |
| i02_1723  | CDS  | 1674121 | 1674801 | -                | narV              | respiratory nitrate reductase 2 gamma chain |
| i02_1724  | CDS  | 1674798 | 1675493 | -                | narW              | respiratory nitrate reductase 2 delta chain |

| <b>Locus_tag</b> | <b>Type</b> | <b>start</b> | <b>End</b> | <b>+/-<sup>a</sup></b> | <b>Gene<sup>b</sup></b> | <b>Product</b>                                |
|------------------|-------------|--------------|------------|------------------------|-------------------------|-----------------------------------------------|
| i02_1725         | CDS         | 1675493      | 1677037    | -                      | narY                    | respiratory nitrate reductase 2 beta chain    |
| i02_1726         | CDS         | 1677034      | 1680897    | -                      | narZ                    | respiratory nitrate reductase 2 alpha chain   |
| i02_1727         | CDS         | 1680869      | 1682275    | -                      | narU                    | nitrite extrusion protein 2                   |
| i02_1728         | CDS         | 1682530      | 1683411    | -                      | yddG                    | hypothetical protein                          |
| i02_1729         | pseudo      | 1683644      | 1686691    | +                      | fdnG                    | formate dehydrogenase                         |
| i02_1730         | CDS         | 1686704      | 1687588    | +                      | fdnH                    | formate dehydrogenase-N beta subunit          |
| i02_1731         | CDS         | 1687563      | 1688234    | +                      | fdnI                    | formate dehydrogenase-N subunit gamma         |
| i02_1732         | CDS         | 1688463      | 1688747    | -                      | yddM                    | hypothetical protein                          |
| i02_1733         | CDS         | 1688747      | 1689025    | -                      | /                       | hypothetical protein                          |
| i02_1734         | CDS         | 1689211      | 1690251    | -                      | adhP                    | alcohol dehydrogenase                         |
| i02_1735         | CDS         | 1690355      | 1692052    | -                      | sfcA                    | malate dehydrogenase                          |
| i02_1736         | CDS         | 1692209      | 1692346    | -                      | rpsV                    | 30S ribosomal subunit S22                     |
| i02_1737         | CDS         | 1692448      | 1692726    | -                      | /                       | biofilm-dependent modulation protein          |
| i02_1738         | CDS         | 1692830      | 1692970    | +                      | /                       | hypothetical protein                          |
| i02_1739         | CDS         | 1693008      | 1693439    | +                      | osmC                    | osmotically inducible protein C               |
| i02_1740         | CDS         | 1693628      | 1696051    | -                      | /                       | putative sensor kinase                        |
| i02_1741         | CDS         | 1696052      | 1696270    | -                      | /                       | hypothetical protein                          |
| i02_1742         | CDS         | 1696594      | 1697913    | -                      | yddW                    | lipoprotein yddW precursor                    |
| i02_1743         | CDS         | 1698044      | 1699579    | -                      | xasA                    | amino acid antiporter                         |
| i02_1744         | CDS         | 1699735      | 1701204    | -                      | gadB                    | glutamate decarboxylase beta                  |
| i02_1745         | CDS         | 1701497      | 1704292    | -                      | pqqL                    | zinc protease pqqL                            |
| i02_1746         | CDS         | 1704337      | 1706709    | -                      | yddB                    | hypothetical protein                          |
| i02_1747         | CDS         | 1706747      | 1708432    | -                      | yddA                    | ABC transporter ATP-binding protein           |
| i02_1748         | CDS         | 1708723      | 1709895    | -                      | ydeM                    | hypothetical protein                          |
| i02_1749         | CDS         | 1709932      | 1711647    | -                      | ydeN                    | putative sulfatase ydeN precursor             |
| i02_1750         | CDS         | 1712016      | 1712777    | -                      | ydeO                    | transcriptional regulator YdeO                |
| i02_1751         | CDS         | 1712853      | 1713050    | -                      | /                       | hypothetical protein                          |
| i02_1752         | CDS         | 1713298      | 1715577    | -                      | ydeP                    | putative oxidoreductase                       |
| i02_1753         | CDS         | 1715916      | 1716830    | -                      | ydeQ                    | fimbrial-like protein ydeQ precursor          |
| i02_1754         | CDS         | 1716890      | 1717393    | -                      | ydeR                    | fimbrial-like protein ydeR precursor          |
| i02_1755         | CDS         | 1717406      | 1717936    | -                      | ydeS                    | fimbrial-like protein ydeS precursor          |
| i02_1756         | CDS         | 1717950      | 1720601    | -                      | /                       | Outer membrane usher protein fimD precursor   |
| i02_1757         | CDS         | 1720643      | 1721362    | -                      | /                       | chaperone protein fimC precursor              |
| i02_1758         | CDS         | 1721715      | 1722326    | -                      | /                       | Type-1 fimbrial protein, A chain precursor    |
| i02_1759         | CDS         | 1723054      | 1723353    | -                      | /                       | hypothetical protein                          |
| i02_1760         | CDS         | 1723579      | 1724031    | +                      | /                       | hypothetical protein                          |
| i02_1761         | CDS         | 1724290      | 1725669    | -                      | hipA                    | protein hipA                                  |
| i02_1762         | CDS         | 1725612      | 1725896    | -                      | hipB                    | DNA-binding transcriptional regulator HipB    |
| i02_1763         | CDS         | 1726186      | 1726944    | +                      | tam                     | trans-aconitate 2-methyltransferase           |
| i02_1764         | CDS         | 1726948      | 1727913    | -                      | yneE                    | hypothetical protein                          |
| i02_1765         | CDS         | 1728059      | 1729510    | -                      | uxaB                    | altronate oxidoreductase                      |
| i02_1766         | CDS         | 1729737      | 1731155    | -                      | yneF                    | hypothetical protein                          |
| i02_1767         | CDS         | 1731294      | 1731653    | -                      | yneG                    | hypothetical protein                          |
| i02_1768         | CDS         | 1731653      | 1732579    | -                      | yneH                    | glutaminase                                   |
| i02_1769         | CDS         | 1732643      | 1734055    | -                      | yneI                    | putative succinate semialdehyde dehydrogenase |
| i02_1770         | CDS         | 1734132      | 1735013    | +                      | yneJ                    | putative transcriptional regulator YneJ       |
| i02_1771         | CDS         | 1735091      | 1735210    | +                      | /                       | hypothetical protein                          |
| i02_1772         | CDS         | 1735352      | 1736542    | +                      | sotB                    | sugar efflux transporter                      |
| i02_1773         | CDS         | 1736567      | 1737232    | -                      | marC                    | multiple drug resistance protein MarC         |
| i02_1774         | CDS         | 1737444      | 1737878    | +                      | marR                    | DNA-binding transcriptional repressor MarR    |
| i02_1775         | CDS         | 1737893      | 1738282    | +                      | marA                    | DNA-binding transcriptional activator MarA    |
| i02_1776         | CDS         | 1738314      | 1738532    | +                      | marB                    | hypothetical protein                          |
| i02_1777         | CDS         | 1738589      | 1740046    | -                      | celA                    | 6-phospho-beta-glucosidase                    |
| i02_1778         | CDS         | 1740053      | 1741726    | -                      | /                       | hypothetical protein                          |
| i02_1779         | CDS         | 1741781      | 1742095    | -                      | /                       | PTS system, cellobiose-specific IIA component |
| i02_1780         | CDS         | 1742120      | 1743481    | -                      | /                       | hypothetical protein                          |
| i02_1781         | CDS         | 1743557      | 1743868    | -                      | /                       | PTS system, cellobiose-specific IIB component |
| i02_1782         | CDS         | 1744067      | 1744765    | +                      | /                       | hypothetical protein                          |

| <b>Locus_tag</b> | <b>Type</b> | <b>start</b> | <b>End</b> | <b>+/-<sup>a</sup></b> | <b>Gene<sup>b</sup></b> | <b>Product</b>                                   |
|------------------|-------------|--------------|------------|------------------------|-------------------------|--------------------------------------------------|
| i02_1783         | CDS         | 1744810      | 1745709    | -                      | ydeD                    | O-acetylserine/cysteine export protein           |
| i02_1784         | CDS         | 1745904      | 1747091    | +                      | ydeF                    | putative MFS-type transporter YdeE               |
| i02_1785         | CDS         | 1747533      | 1748429    | -                      | ydeH                    | hypothetical protein                             |
| i02_1786         | CDS         | 1748677      | 1748838    | -                      | /                       | conserved hypothetical protein                   |
| i02_1787         | CDS         | 1748930      | 1751041    | -                      | dcp                     | dipeptidyl carboxypeptidase II                   |
| i02_1788         | CDS         | 1751097      | 1751858    | +                      | ydfG                    | 3-hydroxy acid dehydrogenase                     |
| i02_1789         | CDS         | 1751947      | 1752633    | +                      | ydfH                    | putative transcriptional regulator YdfH          |
| i02_1790         | CDS         | 1752810      | 1753013    | +                      | ydfZ                    | hypothetical protein                             |
| i02_1791         | CDS         | 1753049      | 1754509    | -                      | /                       | oxidoreductase ydfI                              |
| i02_1792         | CDS         | 1754598      | 1755965    | -                      | ydfJ                    | metabolite transport protein                     |
| i02_1793         | CDS         | 1756023      | 1757042    | -                      | rspB                    | putative dehydrogenase                           |
| i02_1794         | CDS         | 1757054      | 1758301    | -                      | rspA                    | starvation sensing protein rspA                  |
| i02_1795         | CDS         | 1758500      | 1758835    | -                      | ynfA                    | hypothetical protein                             |
| i02_1796         | CDS         | 1758961      | 1759302    | +                      | ynfB                    | hypothetical protein                             |
| i02_1797         | CDS         | 1759337      | 1759897    | +                      | speG                    | spermidine N(1)-acetyltransferase                |
| i02_1798         | CDS         | 1759900      | 1760646    | -                      | ynfC                    | hypothetical protein                             |
| i02_1799         | CDS         | 1760676      | 1761023    | +                      | ynfD                    | hypothetical protein                             |
| i02_1800         | CDS         | 1761222      | 1763648    | +                      | ynfE                    | putative dimethyl sulfoxide reductase chain ynfE |
| i02_1801         | CDS         | 1763706      | 1766132    | +                      | ynfF                    | dimethyl sulfoxide reductase chain ynfF          |
| i02_1802         | CDS         | 1766143      | 1766760    | +                      | ynfG                    | anaerobic dimethyl sulfoxide reductase chain     |
| i02_1803         | CDS         | 1766522      | 1767616    | +                      | ynfH                    | anaerobic dimethyl sulfoxide reductase chain     |
| i02_1804         | CDS         | 1767650      | 1768273    | +                      | ynfI                    | twin-arginine leader-binding protein DmsD        |
| i02_1805         | CDS         | 1768468      | 1769724    | +                      | ynfJ                    | putative voltage-gated ClC-type chloride channel |
| i02_1806         | CDS         | 1769677      | 1770384    | -                      | bioD                    | putative dithiobiotin synthetase                 |
| i02_1807         | CDS         | 1770497      | 1771717    | -                      | mlc                     | Mlc protein                                      |
| i02_1808         | CDS         | 1771852      | 1772745    | -                      | ynfL                    | putative transcriptional regulator YnfL          |
| i02_1809         | CDS         | 1772852      | 1774105    | +                      | ynfM                    | putative transport protein YnfM                  |
| i02_1810         | CDS         | 1775101      | 1775922    | +                      | /                       | putative protease ydgD precursor                 |
| i02_1811         | CDS         | 1775961      | 1776290    | -                      | ydgE                    | multidrug efflux system protein MdtI             |
| i02_1812         | CDS         | 1776277      | 1776642    | -                      | ydgF                    | multidrug efflux system protein MdtJ             |
| i02_1813         | CDS         | 1777054      | 1778088    | +                      | tqsA                    | putative transport protein                       |
| i02_1814         | CDS         | 1778113      | 1779501    | -                      | pntB                    | pyridine nucleotide transhydrogenase             |
| i02_1815         | CDS         | 1779512      | 1781098    | -                      | pntA                    | NAD(P) transhydrogenase subunit alpha            |
| i02_1816         | CDS         | 1781568      | 1782512    | +                      | ydgH                    | hypothetical protein                             |
| i02_1817         | CDS         | 1782671      | 1784080    | +                      | ydgI                    | putative arginine/ornithine antiporter           |
| i02_1818         | CDS         | 1784117      | 1784839    | +                      | ydgB                    | short chain dehydrogenase                        |
| i02_1819         | CDS         | 1784836      | 1785171    | -                      | ydgC                    | hypothetical protein                             |
| i02_1820         | CDS         | 1785240      | 1786019    | +                      | rstA                    | DNA-binding transcriptional regulator RstA       |
| i02_1821         | CDS         | 1786023      | 1787324    | +                      | rstB                    | sensor protein RstB                              |
| i02_1822         | CDS         | 1787388      | 1788329    | +                      | tus                     | DNA replication terminus site-binding protein    |
| i02_1823         | CDS         | 1788326      | 1789729    | -                      | fumC                    | fumarate hydratase                               |
| i02_1824         | CDS         | 1789872      | 1791518    | -                      | fumA                    | fumarate hydratase class I, aerobic              |
| i02_1825         | CDS         | 1791717      | 1792892    | +                      | manA                    | mannose-6-phosphate isomerase                    |
| i02_1826         | CDS         | 1792993      | 1794501    | +                      | ydgA                    | hypothetical protein                             |
| i02_1827         | CDS         | 1794546      | 1795811    | -                      | uidC                    | putative outer membrane porin protein            |
| i02_1828         | CDS         | 1795850      | 1797223    | -                      | uidB                    | glucuronide transporter                          |
| i02_1829         | CDS         | 1797220      | 1799031    | -                      | uidA                    | beta-D-glucuronidase                             |
| i02_1830         | CDS         | 1799421      | 1800011    | -                      | uidR                    | uid operon repressor                             |
| i02_1831         | CDS         | 1800240      | 1801007    | -                      | hdhA                    | 7-alpha-hydroxysteroid dehydrogenase             |
| i02_1832         | CDS         | 1801119      | 1802147    | -                      | mall                    | DNA-binding transcriptional repressor Mall       |
| i02_1833         | CDS         | 1802322      | 1803914    | +                      | malX                    | bifunctional maltose and glucose-specific PTS    |
| i02_1834         | CDS         | 1803924      | 1805096    | +                      | malY                    | cystathionine beta-lyase                         |
| i02_1835         | CDS         | 1805200      | 1806201    | +                      | add                     | adenosine deaminase                              |
| i02_1836         | CDS         | 1806237      | 1807316    | -                      | ydgJ                    | putative oxidoreductase                          |
| i02_1837         | CDS         | 1807734      | 1807997    | +                      | /                       | hypothetical protein                             |
| i02_1838         | CDS         | 1807918      | 1808133    | +                      | ydgT                    | oriC-binding nucleoid-associated protein         |
| i02_1839         | CDS         | 1808195      | 1808659    | +                      | ydgK                    | hypothetical protein                             |
| i02_1840         | CDS         | 1808736      | 1809317    | +                      | /                       | Na(+)-translocating NADH-quinone reductase       |



| <b>Locus_tag</b> | <b>Type</b> | <b>start</b> | <b>End</b> | <b>+/-<sup>a</sup></b> | <b>Gene<sup>b</sup></b> | <b>Product</b>                                   |
|------------------|-------------|--------------|------------|------------------------|-------------------------|--------------------------------------------------|
| i02_1841         | CDS         | 1809317      | 1809895    | +                      | /                       | electron transport complex protein RnfB          |
| i02_1842         | CDS         | 1809888      | 1812116    | +                      | /                       | electron transport complex protein RnfC          |
| i02_1843         | CDS         | 1812117      | 1813175    | +                      | rnfD                    | electron transport complex protein RnfD          |
| i02_1844         | CDS         | 1813179      | 1813799    | +                      | /                       | electron transport complex protein RnfG          |
| i02_1845         | CDS         | 1813803      | 1814498    | +                      | ydgQ                    | electron transport complex RsxE subunit          |
| i02_1846         | CDS         | 1814498      | 1815133    | +                      | nth                     | endonuclease III                                 |
| i02_1847         | CDS         | 1815321      | 1815461    | +                      | /                       | hypothetical protein                             |
| i02_1848         | CDS         | 1815744      | 1817246    | +                      | tppB                    | putative tripeptide transporter permease         |
| i02_1849         | CDS         | 1817352      | 1817957    | +                      | gst                     | glutathionine S-transferase                      |
| i02_1850         | CDS         | 1818001      | 1818864    | -                      | pdxY                    | pyridoxamine kinase                              |
| i02_1851         | CDS         | 1818923      | 1820209    | -                      | tyrS                    | tyrosyl-tRNA synthetase                          |
| i02_1852         | CDS         | 1820326      | 1820982    | -                      | pdxH                    | pyridoxamine 5'-phosphate oxidase                |
| i02_1853         | CDS         | 1821041      | 1821370    | -                      | ydhA                    | lysozyme inhibitor                               |
| i02_1854         | CDS         | 1821468      | 1822577    | -                      | anmK                    | anhydro-N-acetylmuramic acid kinase              |
| i02_1855         | CDS         | 1822851      | 1823318    | +                      | slyB                    | Outer membrane lipoprotein slyB precursor        |
| i02_1856         | CDS         | 1823365      | 1823805    | -                      | slyA                    | transcriptional regulator SlyA                   |
| i02_1857         | CDS         | 1823824      | 1823943    | -                      | /                       | hypothetical protein                             |
| i02_1858         | CDS         | 1824000      | 1824236    | +                      | ydhI                    | hypothetical protein                             |
| i02_1859         | CDS         | 1824197      | 1825096    | +                      | ydhJ                    | hypothetical protein                             |
| i02_1860         | CDS         | 1825096      | 1827108    | +                      | ydhK                    | hypothetical protein                             |
| i02_1861         | CDS         | 1827109      | 1827681    | -                      | sodC                    | superoxide dismutase                             |
| i02_1862         | CDS         | 1827711      | 1828607    | -                      | ydhF                    | oxidoreductase ydhF                              |
| i02_1863         | CDS         | 1828656      | 1829033    | -                      | ydhL                    | hypothetical protein                             |
| i02_1864         | CDS         | 1828998      | 1829597    | +                      | ydhM                    | putative transcriptional regulator YdhM          |
| i02_1865         | CDS         | 1829634      | 1830731    | +                      | nemA                    | N-ethylmaleimide reductase                       |
| i02_1866         | CDS         | 1830812      | 1831219    | +                      | gloA                    | glyoxalase I                                     |
| i02_1867         | CDS         | 1831322      | 1831969    | +                      | rnt                     | ribonuclease T                                   |
| i02_1868         | CDS         | 1832031      | 1832174    | -                      | /                       | hypothetical protein                             |
| i02_1869         | CDS         | 1832062      | 1832205    | +                      | /                       | hypothetical protein                             |
| i02_1870         | CDS         | 1832341      | 1832688    | -                      | ydhD                    | hypothetical protein                             |
| i02_1871         | CDS         | 1833023      | 1833850    | +                      | ydhO                    | hypothetical protein                             |
| i02_1872         | CDS         | 1833978      | 1834559    | +                      | sodB                    | superoxide dismutase                             |
| i02_1873         | CDS         | 1834705      | 1835874    | -                      | ydhP                    | putative transport protein YdhP                  |
| i02_1874         | CDS         | 1836040      | 1836159    | -                      | /                       | hypothetical protein                             |
| i02_1875         | CDS         | 1836428      | 1837453    | +                      | purR                    | DNA-binding transcriptional repressor PurR       |
| i02_1876         | CDS         | 1837450      | 1838382    | -                      | ydhB                    | putative DNA-binding transcriptional regulator   |
| i02_1877         | CDS         | 1838495      | 1839706    | +                      | ydhC                    | inner membrane transport protein YdhC            |
| i02_1878         | CDS         | 1839997      | 1841145    | +                      | cfa                     | cyclopropane fatty acyl phospholipid synthase    |
| i02_1879         | CDS         | 1841185      | 1841826    | -                      | ribE                    | riboflavin synthase subunit alpha                |
| i02_1880         | CDS         | 1842041      | 1843414    | +                      | ydhE                    | multidrug efflux protein                         |
| i02_1881         | CDS         | 1843455      | 1844711    | -                      | ydhQ                    | hypothetical protein                             |
| i02_1882         | CDS         | 1845285      | 1845590    | +                      | /                       | hypothetical protein                             |
| i02_1883         | CDS         | 1845716      | 1847326    | +                      | ydhS                    | hypothetical protein                             |
| i02_1884         | CDS         | 1847332      | 1848144    | -                      | ydhT                    | hypothetical protein                             |
| i02_1885         | CDS         | 1847533      | 1848279    | +                      | /                       | hypothetical protein                             |
| i02_1886         | CDS         | 1848148      | 1848933    | -                      | ydhU                    | PhsC protein                                     |
| i02_1887         | CDS         | 1848930      | 1849649    | -                      | /                       | putative ferredoxin-like protein ydhX            |
| i02_1888         | CDS         | 1849662      | 1850309    | -                      | ydhW                    | hypothetical protein                             |
| i02_1889         | CDS         | 1850313      | 1852415    | -                      | ydhV                    | putative oxidoreductase                          |
| i02_1890         | CDS         | 1852436      | 1853062    | -                      | /                       | hypothetical protein                             |
| i02_1891         | CDS         | 1853518      | 1853727    | -                      | ydhZ                    | hypothetical protein                             |
| i02_1892         | CDS         | 1853839      | 1853967    | +                      | /                       | hypothetical protein                             |
| i02_1893         | CDS         | 1854069      | 1855697    | +                      | pykF                    | pyruvate kinase                                  |
| i02_1894         | CDS         | 1856008      | 1856244    | +                      | lpp                     | major outer membrane lipoprotein precursor       |
| i02_1895         | CDS         | 1856307      | 1857311    | -                      | ynhG                    | hypothetical protein                             |
| i02_1896         | CDS         | 1857460      | 1857876    | -                      | ynhA                    | cysteine desufuration protein SufE               |
| i02_1897         | CDS         | 1857889      | 1859109    | -                      | /                       | bifunctional cysteine desulfurase/selenocysteine |
| i02_1898         | CDS         | 1859106      | 1860377    | -                      | ynhC                    | cysteine desulfurase activator complex subunit   |

| <b>Locus_tag</b> | <b>Type</b> | <b>start</b> | <b>End</b> | <b>+/-<sup>a</sup></b> | <b>Gene<sup>b</sup></b> | <b>Product</b>                                 |
|------------------|-------------|--------------|------------|------------------------|-------------------------|------------------------------------------------|
| i02_1899         | CDS         | 1860352      | 1861098    | -                      | sufC                    | cysteine desulfurase ATPase component          |
| i02_1900         | CDS         | 1861108      | 1862634    | -                      | ynhE                    | cysteine desulfurase activator complex subunit |
| i02_1901         | CDS         | 1862604      | 1862972    | -                      | sufA                    | iron-sulfur cluster assembly scaffold protein  |
| i02_1902         | CDS         | 1863521      | 1863790    | -                      | ydiH                    | hypothetical protein                           |
| i02_1903         | CDS         | 1863809      | 1864219    | -                      | ydiI                    | hypothetical protein                           |
| i02_1904         | CDS         | 1864216      | 1867272    | -                      | ydiJ                    | hypothetical protein                           |
| i02_1905         | CDS         | 1867486      | 1868598    | +                      | ydiK                    | putative inner membrane protein                |
| i02_1906         | CDS         | 1869000      | 1869383    | +                      | ydiL                    | hypothetical protein                           |
| i02_1907         | CDS         | 1869483      | 1870697    | +                      | ydiM                    | putative transport protein YdiM                |
| i02_1908         | CDS         | 1870918      | 1872189    | +                      | ydiN                    | putative transport protein YdiN                |
| i02_1909         | CDS         | 1872201      | 1873067    | +                      | aroE                    | quininate/shikimate dehydrogenase              |
| i02_1910         | CDS         | 1873098      | 1873856    | +                      | aroD                    | 3-dehydroquininate dehydratase                 |
| i02_1911         | CDS         | 1874002      | 1875597    | +                      | ydiF                    | hypothetical protein                           |
| i02_1912         | CDS         | 1875611      | 1876762    | +                      | ydiO                    | putative acyl-CoA dehydrogenase                |
| i02_1913         | CDS         | 1876805      | 1877716    | -                      | ydiP                    | putative transcriptional regulator YdiP        |
| i02_1914         | CDS         | 1877819      | 1877995    | -                      | /                       | hypothetical protein                           |
| i02_1915         | CDS         | 1878011      | 1878796    | +                      | ydiQ                    | putative electron transfer flavoprotein YdiQ   |
| i02_1916         | CDS         | 1878816      | 1879754    | +                      | ydiR                    | electron transfer flavoprotein subunit YdiR    |
| i02_1917         | CDS         | 1879809      | 1881098    | +                      | ydiS                    | hypothetical protein                           |
| i02_1918         | CDS         | 1881095      | 1881388    | +                      | ydiT                    | ferredoxin-like protein ydiT                   |
| i02_1919         | CDS         | 1881391      | 1883091    | +                      | ydiD                    | short chain acyl-CoA synthetase                |
| i02_1920         | CDS         | 1883148      | 1885526    | -                      | ppsA                    | phosphoenolpyruvate synthase                   |
| i02_1921         | CDS         | 1885859      | 1886692    | +                      | ydiA                    | hypothetical protein                           |
| i02_1922         | CDS         | 1886849      | 1887895    | +                      | aroH                    | phospho-2-dehydro-3-deoxyheptonate aldolase    |
| i02_1923         | CDS         | 1888000      | 1888218    | +                      | ydiE                    | hypothetical protein                           |
| i02_1924         | CDS         | 1888222      | 1889658    | -                      | ydiU                    | hypothetical protein                           |
| i02_1925         | CDS         | 1889721      | 1890434    | -                      | ydiV                    | hypothetical protein                           |
| i02_1926         | CDS         | 1890681      | 1891145    | -                      | nlpC                    | lipoprotein NlpC                               |
| i02_1927         | CDS         | 1891223      | 1891972    | -                      | btuD                    | vitamin B12-transporter ATPase                 |
| i02_1928         | CDS         | 1891972      | 1892523    | -                      | btuE                    | putative glutathione peroxidase                |
| i02_1929         | CDS         | 1892585      | 1893565    | -                      | btuC                    | vitamin B12-transporter permease               |
| i02_1930         | CDS         | 1893462      | 1893590    | -                      | /                       | hypothetical protein                           |
| i02_1931         | CDS         | 1893666      | 1893965    | -                      | ihfA                    | integration host factor subunit alpha          |
| i02_1932         | CDS         | 1893970      | 1896357    | -                      | pheT                    | phenylalanyl-tRNA synthetase subunit beta      |
| i02_1933         | CDS         | 1896372      | 1897355    | -                      | pheS                    | phenylalanyl-tRNA synthetase subunit alpha     |
| i02_1934         | CDS         | 1897806      | 1898162    | -                      | rplT                    | 50S ribosomal protein L20                      |
| i02_1935         | CDS         | 1898284      | 1898895    | +                      | /                       | hypothetical protein                           |
| i02_1936         | CDS         | 1898509      | 1898943    | -                      | infC                    | translation initiation factor IF-3             |
| i02_1937         | CDS         | 1899055      | 1900983    | -                      | thrS                    | threonyl-tRNA synthetase                       |
| i02_1938         | CDS         | 1901669      | 1902034    | +                      | /                       | hypothetical protein                           |
| i02_1939         | CDS         | 1902052      | 1902363    | +                      | /                       | hypothetical protein                           |
| i02_1940         | CDS         | 1902344      | 1902535    | +                      | /                       | hypothetical protein                           |
| i02_1941         | CDS         | 1902691      | 1902813    | +                      | /                       | hypothetical protein                           |
| i02_1942         | CDS         | 1902866      | 1903624    | -                      | ydiY                    | hypothetical protein                           |
| i02_1943         | CDS         | 1903908      | 1904840    | +                      | pfkB                    | 6-phosphofructokinase 2                        |
| i02_1944         | CDS         | 1904941      | 1905231    | +                      | ydiZ                    | hypothetical protein                           |
| i02_1945         | CDS         | 1905337      | 1906197    | +                      | yniA                    | hypothetical protein                           |
| i02_1946         | CDS         | 1906238      | 1906774    | -                      | yniB                    | hypothetical protein                           |
| i02_1947         | CDS         | 1906921      | 1907589    | +                      | yniC                    | 2-deoxyglucose-6-phosphatase                   |
| i02_1948         | CDS         | 1907741      | 1908343    | +                      | ydjM                    | hypothetical protein                           |
| i02_1949         | CDS         | 1908476      | 1909867    | +                      | ydjN                    | putative symporter ydjN                        |
| i02_1950         | CDS         | 1909914      | 1910177    | -                      | /                       | cell division modulator                        |
| i02_1951         | CDS         | 1910360      | 1912621    | +                      | katE                    | hydroperoxidase II                             |
| i02_1952         | CDS         | 1912668      | 1913426    | -                      | ydjC                    | hypothetical protein                           |
| i02_1953         | CDS         | 1913439      | 1914845    | -                      | celF                    | 6-phospho-beta-glucosidase                     |
| i02_1954         | CDS         | 1914894      | 1915736    | -                      | celD                    | DNA-binding transcriptional regulator ChbR     |
| i02_1955         | CDS         | 1915744      | 1916094    | -                      | celC                    | N,N'-diacetylchitobiose-specific PTS system    |
| i02_1956         | CDS         | 1916145      | 1917503    | -                      | celB                    | N,N'-diacetylchitobiose-specific PTS system    |

| <b>Locus_tag</b> | <b>Type</b> | <b>start</b> | <b>End</b> | <b>+/-<sup>a</sup></b> | <b>Gene<sup>b</sup></b> | <b>Product</b>                                  |
|------------------|-------------|--------------|------------|------------------------|-------------------------|-------------------------------------------------|
| i02_1957         | CDS         | 1917588      | 1917908    | -                      | celA                    | N,N'-diacetylchitobiose-specific PTS system     |
| i02_1958         | CDS         | 1918208      | 1918546    | -                      | osmE                    | DNA-binding transcriptional activator OsmE      |
| i02_1959         | CDS         | 1918748      | 1919575    | +                      | nadE                    | NAD synthetase                                  |
| i02_1960         | CDS         | 1919805      | 1920692    | +                      | ydjQ                    | nucleotide excision repair endonuclease         |
| i02_1961         | CDS         | 1920652      | 1921290    | -                      | ydjR                    | hypothetical protein                            |
| i02_1962         | CDS         | 1921430      | 1921915    | -                      | spy                     | periplasmic protein                             |
| i02_1963         | CDS         | 1922245      | 1923213    | -                      | ydjS                    | succinylglutamate desuccinylase                 |
| i02_1964         | CDS         | 1923206      | 1924549    | -                      | /                       | succinylarginine dihydrolase                    |
| i02_1965         | CDS         | 1924546      | 1926024    | -                      | astD                    | succinylglutamic semialdehyde dehydrogenase     |
| i02_1966         | CDS         | 1926021      | 1927055    | -                      | /                       | arginine succinyltransferase                    |
| i02_1967         | CDS         | 1927052      | 1928272    | -                      | argD                    | bifunctional succinylornithine                  |
| i02_1968         | CDS         | 1928535      | 1928705    | +                      | /                       | hypothetical protein                            |
| i02_1969         | CDS         | 1928706      | 1929524    | +                      | xthA                    | exonuclease III                                 |
| i02_1970         | CDS         | 1929643      | 1930401    | +                      | ydjX                    | hypothetical protein                            |
| i02_1971         | CDS         | 1930244      | 1931083    | +                      | ydjY                    | hypothetical protein                            |
| i02_1972         | CDS         | 1931097      | 1931804    | +                      | ydjZ                    | hypothetical protein                            |
| i02_1973         | CDS         | 1931804      | 1932352    | +                      | ynjA                    | hypothetical protein                            |
| i02_1974         | CDS         | 1932362      | 1933528    | +                      | /                       | putative ABC transporter solute-binding protein |
| i02_1975         | CDS         | 1933477      | 1935036    | +                      | ynjC                    | ABC transporter permease                        |
| i02_1976         | CDS         | 1934949      | 1935689    | +                      | ynjD                    | ABC transporter ATP-binding protein             |
| i02_1977         | CDS         | 1935741      | 1937063    | +                      | /                       | putative thiosulfate sulfurtransferase ynjE     |
| i02_1978         | CDS         | 1937072      | 1937698    | -                      | ynjF                    | hypothetical protein                            |
| i02_1979         | CDS         | 1937779      | 1938186    | +                      | /                       | pyrimidine (deoxy)nucleoside triphosphate       |
| i02_1980         | CDS         | 1938152      | 1938424    | -                      | ynjH                    | hypothetical protein                            |
| i02_1981         | CDS         | 1938660      | 1940003    | +                      | gdhA                    | glutamate dehydrogenase                         |
| i02_1982         | CDS         | 1940059      | 1942002    | -                      | /                       | hypothetical protein                            |
| i02_1983         | CDS         | 1941999      | 1943699    | -                      | ybeW                    | chaperone protein hscC                          |
| i02_1984         | CDS         | 1943769      | 1944569    | -                      | /                       | hypothetical protein                            |
| i02_1985         | CDS         | 1944688      | 1946691    | -                      | topB                    | DNA topoisomerase III                           |
| i02_1986         | CDS         | 1946639      | 1947688    | -                      | selD                    | selenophosphate synthetase                      |
| i02_1987         | CDS         | 1947799      | 1948350    | -                      | ydjA                    | hypothetical protein                            |
| i02_1988         | CDS         | 1948404      | 1948568    | +                      | /                       | hypothetical protein                            |
| i02_1989         | CDS         | 1948511      | 1950367    | +                      | sppA                    | protease 4                                      |
| i02_1990         | CDS         | 1950534      | 1951550    | +                      | ansA                    | cytoplasmic asparaginase I                      |
| i02_1991         | CDS         | 1951543      | 1952202    | +                      | ydjB                    | nicotinamidase/pyrazinamidase                   |
| i02_1992         | CDS         | 1952295      | 1953722    | -                      | ydjE                    | metabolite transporter                          |
| i02_1993         | CDS         | 1953771      | 1954529    | -                      | ydjF                    | putative transcriptional regulator YdjF         |
| i02_1994         | CDS         | 1954666      | 1955646    | -                      | ydjG                    | oxidoreductase ydjG                             |
| i02_1995         | CDS         | 1955656      | 1956624    | -                      | ydjH                    | putative sugar kinase ydjH                      |
| i02_1996         | CDS         | 1956608      | 1957444    | -                      | ydjI                    | hypothetical protein                            |
| i02_1997         | CDS         | 1957465      | 1958508    | -                      | ydjJ                    | hypothetical protein                            |
| i02_1998         | CDS         | 1958525      | 1959904    | -                      | ydjK                    | metabolite transporter                          |
| i02_1999         | CDS         | 1959789      | 1959941    | -                      | /                       | hypothetical protein                            |
| i02_2000         | CDS         | 1959931      | 1961007    | -                      | ydjL                    | hypothetical protein                            |
| i02_2001         | CDS         | 1961377      | 1961664    | -                      | yeaC                    | hypothetical protein                            |
| i02_2002         | CDS         | 1961693      | 1962136    | -                      | yeaA                    | methionine sulfoxide reductase B                |
| i02_2003         | CDS         | 1962439      | 1963443    | +                      | gapA                    | glyceraldehyde-3-phosphate dehydrogenase        |
| i02_2004         | CDS         | 1963506      | 1964411    | +                      | yeaD                    | hypothetical protein                            |
| i02_2005         | CDS         | 1964462      | 1965361    | -                      | yeaE                    | hypothetical protein                            |
| i02_2006         | CDS         | 1965406      | 1966152    | -                      | yeaF                    | MltA-interacting protein precursor              |
| i02_2007         | CDS         | 1966588      | 1968522    | +                      | yeaG                    | hypothetical protein                            |
| i02_2008         | CDS         | 1968635      | 1969918    | +                      | yeaH                    | hypothetical protein                            |
| i02_2009         | CDS         | 1970065      | 1971540    | +                      | yeaI                    | hypothetical protein                            |
| i02_2010         | CDS         | 1971541      | 1973211    | +                      | yeaJ                    | hypothetical protein                            |
| i02_2011         | CDS         | 1973254      | 1973757    | +                      | yeaK                    | hypothetical protein                            |
| i02_2012         | CDS         | 1973758      | 1973910    | -                      | /                       | hypothetical protein                            |
| i02_2013         | CDS         | 1974032      | 1974478    | +                      | yeaL                    | hypothetical protein                            |
| i02_2014         | CDS         | 1974435      | 1975256    | -                      | yeaM                    | putative transcriptional regulator YeaM         |

| <b>Locus_tag</b> | <b>Type</b> | <b>start</b> | <b>End</b> | <b>+/-<sup>a</sup></b> | <b>Gene<sup>b</sup></b> | <b>Product</b>                               |
|------------------|-------------|--------------|------------|------------------------|-------------------------|----------------------------------------------|
| i02_2015         | CDS         | 1975353      | 1976534    | +                      | yeaN                    | putative transport protein YeaN              |
| i02_2016         | CDS         | 1976589      | 1976936    | +                      | yeaO                    | hypothetical protein                         |
| i02_2017         | CDS         | 1976958      | 1977212    | -                      | yoaF                    | hypothetical protein                         |
| i02_2018         | CDS         | 1977266      | 1978420    | +                      | yeaP                    | hypothetical protein                         |
| i02_2019         | CDS         | 1978438      | 1978551    | +                      | /                       | hypothetical protein                         |
| i02_2020         | CDS         | 1978688      | 1978936    | -                      | yeaQ                    | hypothetical protein                         |
| i02_2021         | CDS         | 1978948      | 1979070    | -                      | /                       | hypothetical protein                         |
| i02_2022         | CDS         | 1979084      | 1979266    | -                      | yoaG                    | hypothetical protein                         |
| i02_2023         | CDS         | 1979270      | 1979629    | -                      | yeaR                    | hypothetical protein                         |
| i02_2024         | CDS         | 1979600      | 1979734    | +                      | /                       | hypothetical protein                         |
| i02_2025         | CDS         | 1979802      | 1980440    | -                      | yeaS                    | leucine export protein LeuE                  |
| i02_2026         | CDS         | 1980567      | 1980899    | -                      | /                       | hypothetical protein                         |
| i02_2028         | CDS         | 1980983      | 1982110    | -                      | rnd                     | ribonuclease D                               |
| i02_2029         | CDS         | 1982180      | 1983931    | -                      | fadD                    | long-chain-fatty-acid--CoA ligase            |
| i02_2030         | CDS         | 1984070      | 1984651    | -                      | yeaY                    | lipoprotein yeaY precursor                   |
| i02_2031         | CDS         | 1984691      | 1985386    | -                      | yeaZ                    | hypothetical protein                         |
| i02_2032         | CDS         | 1985444      | 1987354    | -                      | /                       | ATP-dependent helicase yoaA                  |
| i02_2033         | CDS         | 1987438      | 1987830    | +                      | yoaB                    | hypothetical protein                         |
| i02_2034         | CDS         | 1987998      | 1988111    | -                      | /                       | hypothetical protein                         |
| i02_2035         | CDS         | 1988192      | 1988551    | +                      | yoaC                    | hypothetical protein                         |
| i02_2036         | CDS         | 1988668      | 1988832    | +                      | /                       | hypothetical protein                         |
| i02_2037         | CDS         | 1988924      | 1990285    | +                      | pabB                    | para-aminobenzoate synthase component I      |
| i02_2038         | CDS         | 1990289      | 1990867    | +                      | yeaB                    | hypothetical protein                         |
| i02_2039         | CDS         | 1991051      | 1992415    | +                      | sdaA                    | L-serine dehydratase 1                       |
| i02_2040         | CDS         | 1992516      | 1994144    | +                      | yoaD                    | hypothetical protein                         |
| i02_2041         | CDS         | 1994148      | 1995704    | -                      | yoaE                    | hypothetical protein                         |
| i02_2042         | CDS         | 1996167      | 1997138    | +                      | manX                    | PTS system, mannose-specific IAB component   |
| i02_2043         | CDS         | 1997201      | 1998001    | +                      | manY                    | PTS system, mannose-specific IIC component   |
| i02_2044         | CDS         | 1998005      | 1998865    | +                      | manZ                    | mannose-specific PTS system protein IID      |
| i02_2045         | CDS         | 1998920      | 1999378    | +                      | yobD                    | hypothetical protein                         |
| i02_2046         | CDS         | 1999753      | 2000373    | +                      | yebN                    | hypothetical protein                         |
| i02_2047         | CDS         | 2000370      | 2001179    | -                      | rrmA                    | 23S rRNA methyltransferase A                 |
| i02_2048         | CDS         | 2001345      | 2001554    | -                      | cspC                    | cold shock-like protein CspC                 |
| i02_2049         | CDS         | 2001567      | 2001710    | -                      | yobF                    | hypothetical protein                         |
| i02_2050         | CDS         | 2001672      | 2001878    | +                      | /                       | hypothetical protein                         |
| i02_2051         | CDS         | 2002380      | 2002667    | -                      | yebO                    | hypothetical protein                         |
| i02_2052         | CDS         | 2002742      | 2002885    | -                      | /                       | hypothetical protein                         |
| i02_2053         | CDS         | 2003044      | 2003283    | +                      | /                       | hypothetical protein                         |
| i02_2054         | CDS         | 2003427      | 2004218    | -                      | /                       | transcriptional regulator kdgR               |
| i02_2055         | CDS         | 2004284      | 2005768    | +                      | yebQ                    | putative transport protein YebQ              |
| i02_2056         | CDS         | 2005814      | 2006695    | -                      | htpX                    | heat shock protein HtpX                      |
| i02_2057         | CDS         | 2006887      | 2008935    | -                      | prc                     | carboxy-terminal protease                    |
| i02_2058         | CDS         | 2008955      | 2009653    | -                      | proQ                    | putative solute/DNA competence effector      |
| i02_2059         | CDS         | 2009750      | 2010196    | -                      | /                       | hypothetical protein                         |
| i02_2060         | CDS         | 2010377      | 2011660    | +                      | yebS                    | hypothetical protein                         |
| i02_2061         | CDS         | 2011587      | 2014262    | +                      | yebT                    | hypothetical protein                         |
| i02_2062         | CDS         | 2014336      | 2015781    | +                      | yebU                    | rRNA (cytosine-C(5)-)-methyltransferase RsmF |
| i02_2063         | CDS         | 2015884      | 2016135    | +                      | yebV                    | hypothetical protein                         |
| i02_2064         | CDS         | 2016156      | 2016431    | +                      | yebW                    | hypothetical protein                         |
| i02_2065         | CDS         | 2016432      | 2017091    | -                      | pphA                    | serine/threonine protein phosphatase 1       |
| i02_2066         | CDS         | 2017313      | 2017465    | -                      | /                       | hypothetical protein                         |
| i02_2067         | CDS         | 2017483      | 2017824    | -                      | yebY                    | hypothetical protein                         |
| i02_2068         | CDS         | 2017837      | 2018709    | -                      | yebZ                    | hypothetical protein                         |
| i02_2069         | CDS         | 2018713      | 2019087    | -                      | /                       | hypothetical protein                         |
| i02_2070         | CDS         | 2019226      | 2019456    | +                      | holE                    | DNA polymerase III subunit theta             |
| i02_2071         | CDS         | 2019559      | 2020215    | +                      | yobB                    | hypothetical protein                         |
| i02_2072         | CDS         | 2020239      | 2020901    | +                      | /                       | exodeoxyribonuclease X                       |
| i02_2073         | pseudo      | 2020898      | 2022958    | -                      | ptrB                    | protease II                                  |

| <b>Locus_tag</b> | <b>Type</b> | <b>start</b> | <b>End</b> | <b>+/-<sup>a</sup></b> | <b>Gene<sup>b</sup></b> | <b>Product</b>                                                                       |
|------------------|-------------|--------------|------------|------------------------|-------------------------|--------------------------------------------------------------------------------------|
| i02_2074         | CDS         | 2023044      | 2023646    | +                      | /                       | hypothetical protein                                                                 |
| i02_2075         | CDS         | 2023167      | 2023826    | -                      | yebE                    | hypothetical protein                                                                 |
| i02_2076         | CDS         | 2024153      | 2024521    | -                      | yebF                    | hypothetical protein                                                                 |
| i02_2077         | CDS         | 2024576      | 2024866    | -                      | yebG                    | DNA damage-inducible protein YebG                                                    |
| i02_2078         | CDS         | 2025000      | 2026178    | +                      | purK                    | phosphoribosylaminoimidazole carboxylase<br>ATPase                                   |
| i02_2079         | CDS         | 2026234      | 2026875    | -                      | eda                     | keto-hydroxyglutarate-aldolase/ 2-keto-4-<br>hydroxyglutarate aldolase decarboxylase |
| i02_2080         | CDS         | 2026912      | 2028789    | -                      | edd                     | phosphogluconate dehydratase                                                         |
| i02_2081         | CDS         | 2028958      | 2030433    | -                      | zwf                     | glucose-6-phosphate 1-dehydrogenase                                                  |
| i02_2082         | CDS         | 2030599      | 2030748    | -                      | /                       | hypothetical protein                                                                 |
| i02_2083         | CDS         | 2030771      | 2031640    | +                      | yebK                    | DNA-binding transcriptional regulator HexR                                           |
| i02_2084         | CDS         | 2031627      | 2033210    | +                      | pykA                    | pyruvate kinase                                                                      |
| i02_2085         | CDS         | 2033342      | 2034313    | -                      | msbB                    | lipid A biosynthesis (KDO)2-(lauroyl)-lipid IVA                                      |
| i02_2086         | CDS         | 2034432      | 2035754    | -                      | yebA                    | hypothetical protein                                                                 |
| i02_2087         | CDS         | 2035770      | 2036756    | -                      | znuA                    | high-affinity zinc transporter periplasmic                                           |
| i02_2088         | CDS         | 2036781      | 2037536    | +                      | znuC                    | high-affinity zinc transporter ATPase                                                |
| i02_2089         | CDS         | 2037533      | 2038318    | +                      | znuB                    | high-affinity zinc transporter membrane                                              |
| i02_2090         | CDS         | 2038465      | 2039475    | -                      | ruvB                    | Holliday junction DNA helicase RuvB                                                  |
| i02_2091         | CDS         | 2039484      | 2040095    | -                      | ruvA                    | Holliday junction DNA helicase RuvA                                                  |
| i02_2092         | CDS         | 2040371      | 2040973    | +                      | yebB                    | hypothetical protein                                                                 |
| i02_2093         | CDS         | 2040975      | 2041499    | -                      | ruvC                    | Holliday junction resolvase                                                          |
| i02_2094         | CDS         | 2041531      | 2042271    | -                      | yebC                    | hypothetical protein                                                                 |
| i02_2095         | CDS         | 2042300      | 2042743    | -                      | ntpA                    | dATP pyrophosphohydrolase                                                            |
| i02_2096         | CDS         | 2042745      | 2044517    | -                      | aspS                    | aspartyl-tRNA synthetase                                                             |
| i02_2097         | CDS         | 2044827      | 2045393    | +                      | yecD                    | hypothetical protein                                                                 |
| i02_2098         | CDS         | 2045390      | 2046208    | +                      | yecE                    | hypothetical protein                                                                 |
| i02_2099         | CDS         | 2046231      | 2046656    | +                      | yecN                    | hypothetical protein                                                                 |
| i02_2100         | CDS         | 2046697      | 2047440    | +                      | yecO                    | hypothetical protein                                                                 |
| i02_2101         | CDS         | 2047437      | 2048408    | +                      | yecP                    | hypothetical protein                                                                 |
| i02_2102         | CDS         | 2048573      | 2051020    | -                      | bisZ                    | trimethylamine-N-oxide reductase 2 precursor                                         |
| i02_2104         | CDS         | 2051027      | 2052127    | -                      | yecK                    | cytochrome c-type protein torY                                                       |
| i02_2105         | CDS         | 2052033      | 2052164    | -                      | /                       | hypothetical protein                                                                 |
| i02_2106         | CDS         | 2052515      | 2053261    | -                      | /                       | copper homeostasis protein CutC                                                      |
| i02_2107         | CDS         | 2053275      | 2053847    | -                      | yecM                    | hypothetical protein                                                                 |
| i02_2108         | CDS         | 2054057      | 2055790    | +                      | argS                    | arginyl-tRNA synthetase                                                              |
| i02_2109         | CDS         | 2055843      | 2056235    | -                      | flhE                    | flagellar protein flhE precursor                                                     |
| i02_2110         | CDS         | 2056235      | 2058313    | -                      | flhA                    | flagellar biosynthesis protein FlhA                                                  |
| i02_2111         | CDS         | 2058306      | 2059454    | -                      | flhB                    | flagellar biosynthesis protein FlhB                                                  |
| i02_2112         | CDS         | 2059487      | 2059633    | +                      | /                       | hypothetical protein                                                                 |
| i02_2113         | CDS         | 2059663      | 2060307    | -                      | cheZ                    | chemotaxis regulator CheZ                                                            |
| i02_2114         | CDS         | 2060318      | 2060707    | -                      | cheY                    | chemotaxis regulatory protein CheY                                                   |
| i02_2115         | CDS         | 2060722      | 2061771    | -                      | cheB                    | chemotaxis-specific methylesterase                                                   |
| i02_2116         | CDS         | 2061774      | 2062634    | -                      | cheR                    | chemotaxis methyltransferase CheR                                                    |
| i02_2117         | CDS         | 2062653      | 2062772    | -                      | /                       | methyl-accepting protein IV                                                          |
| i02_2118         | CDS         | 2062760      | 2062882    | -                      | /                       | hypothetical protein                                                                 |
| i02_2119         | CDS         | 2062925      | 2064607    | -                      | tar                     | methyl-accepting chemotaxis protein II                                               |
| i02_2120         | CDS         | 2064731      | 2065234    | -                      | cheW                    | purine-binding chemotaxis protein                                                    |
| i02_2121         | CDS         | 2065255      | 2067273    | -                      | cheA                    | chemotaxis protein CheA                                                              |
| i02_2122         | CDS         | 2067224      | 2068150    | -                      | motB                    | flagellar motor protein MotB                                                         |
| i02_2123         | CDS         | 2068147      | 2069034    | -                      | motA                    | flagellar motor protein MotA                                                         |
| i02_2124         | CDS         | 2069160      | 2069738    | -                      | flhC                    | transcriptional activator FlhC                                                       |
| i02_2125         | CDS         | 2069741      | 2070100    | -                      | flhD                    | transcriptional activator FlhD                                                       |
| i02_2126         | CDS         | 2070871      | 2071305    | +                      | yecG                    | universal stress protein UspC                                                        |
| i02_2127         | CDS         | 2071312      | 2072745    | -                      | otsA                    | trehalose-6-phosphate synthase                                                       |
| i02_2128         | CDS         | 2072711      | 2073568    | -                      | otsB                    | trehalose-6-phosphate phosphatase                                                    |
| i02_2129         | CDS         | 2073678      | 2074667    | -                      | araH                    | L-arabinose transporter permease protein                                             |
| i02_2130         | CDS         | 2074679      | 2076238    | -                      | araG                    | L-arabinose transporter ATP-binding protein                                          |

| <b>Locus_tag</b> | <b>Type</b> | <b>start</b> | <b>End</b> | <b>+/-<sup>a</sup></b> | <b>Gene<sup>b</sup></b> | <b>Product</b>                                            |
|------------------|-------------|--------------|------------|------------------------|-------------------------|-----------------------------------------------------------|
| i02_2131         | CDS         | 2076263      | 2077303    | -                      | araF                    | L-arabinose-binding periplasmic protein                   |
| i02_2132         | CDS         | 2078049      | 2078552    | +                      | yecI                    | Ferritin-like protein 2                                   |
| i02_2133         | CDS         | 2078631      | 2078882    | -                      | /                       | hypothetical protein                                      |
| i02_2134         | CDS         | 2078994      | 2079140    | +                      | /                       | hypothetical protein                                      |
| i02_2135         | CDS         | 2079388      | 2079669    | +                      | yecR                    | hypothetical protein                                      |
| i02_2136         | CDS         | 2079679      | 2079816    | -                      | /                       | hypothetical protein                                      |
| i02_2137         | CDS         | 2079826      | 2080338    | +                      | ftn                     | ferritin                                                  |
| i02_2138         | CDS         | 2080376      | 2080615    | -                      | yecH                    | hypothetical protein                                      |
| i02_2139         | CDS         | 2080806      | 2082017    | +                      | tyrP                    | tyrosine transporter                                      |
| i02_2140         | CDS         | 2082079      | 2082744    | -                      | yecA                    | hypothetical protein                                      |
| i02_2141         | CDS         | 2083393      | 2083941    | -                      | pgsA                    | phosphatidylglycerophosphate synthetase                   |
| i02_2142         | CDS         | 2083998      | 2085830    | -                      | uvrC                    | excinuclease ABC subunit C                                |
| i02_2143         | CDS         | 2085827      | 2086483    | -                      | uvrY                    | response regulator                                        |
| i02_2144         | CDS         | 2086722      | 2086850    | -                      | /                       | hypothetical protein                                      |
| i02_2145         | CDS         | 2086942      | 2087166    | +                      | yecF                    | hypothetical protein                                      |
| i02_2146         | CDS         | 2087234      | 2087956    | -                      | sdiA                    | DNA-binding transcriptional activator SdiA                |
| i02_2147         | CDS         | 2088186      | 2088938    | -                      | yecC                    | putative amino-acid ABC transporter ATP-binding component |
| i02_2148         | CDS         | 2088935      | 2089603    | -                      | yecS                    | amino-acid ABC transporter permease protein               |
| i02_2149         | CDS         | 2089618      | 2090700    | -                      | yedO                    | D-cysteine desulfhydrase                                  |
| i02_2150         | CDS         | 2090709      | 2091566    | -                      | fliY                    | cystine transporter subunit                               |
| i02_2151         | CDS         | 2091597      | 2092184    | -                      | fliZ                    | flagella biosynthesis protein FliZ                        |
| i02_2152         | CDS         | 2092194      | 2092913    | -                      | fliA                    | flagellar biosynthesis sigma factor                       |
| i02_2153         | CDS         | 2092987      | 2093106    | +                      | /                       | hypothetical protein                                      |
| i02_2154         | CDS         | 2093233      | 2095020    | -                      | fliC                    | flagellin                                                 |
| i02_2155         | CDS         | 2095286      | 2096692    | +                      | fliD                    | flagellar capping protein                                 |
| i02_2156         | CDS         | 2096717      | 2097127    | +                      | fliS                    | flagellar protein FliS                                    |
| i02_2157         | CDS         | 2097127      | 2097492    | +                      | fliT                    | flagellar biosynthesis protein FliT                       |
| i02_2158         | CDS         | 2097570      | 2099057    | +                      | amyA                    | cytoplasmic alpha-amylase                                 |
| i02_2159         | CDS         | 2099091      | 2099507    | -                      | yedD                    | hypothetical protein                                      |
| i02_2160         | CDS         | 2099658      | 2100896    | +                      | yedE                    | putative inner membrane protein                           |
| i02_2161         | CDS         | 2100893      | 2101126    | +                      | yedF                    | hypothetical protein                                      |
| i02_2162         | CDS         | 2101142      | 2101903    | +                      | yedK                    | hypothetical protein                                      |
| i02_2163         | CDS         | 2102416      | 2103498    | +                      | /                       | Outer membrane porin protein nmpC precursor               |
| i02_2164         | CDS         | 2104000      | 2104797    | -                      | ybcM                    | putative transcriptional regulator YbcM                   |
| i02_2165         | CDS         | 2104807      | 2105358    | -                      | ybcL                    | putative kinase inhibitor                                 |
| i02_2167         | CDS         | 2105527      | 2106024    | -                      | emrE                    | multidrug efflux protein                                  |
| i02_2168         | CDS         | 2106204      | 2106518    | -                      | fliE                    | flagellar hook-basal body protein FliE                    |
| i02_2169         | CDS         | 2106733      | 2108391    | +                      | fliF                    | flagellar MS-ring protein                                 |
| i02_2170         | CDS         | 2108384      | 2109379    | +                      | fliG                    | flagellar motor switch protein G                          |
| i02_2171         | CDS         | 2108537      | 2109466    | -                      | /                       | hypothetical protein                                      |
| i02_2172         | CDS         | 2109372      | 2110058    | +                      | fliH                    | flagellar assembly protein H                              |
| i02_2173         | CDS         | 2110094      | 2111431    | +                      | fliI                    | flagellum-specific ATP synthase                           |
| i02_2174         | CDS         | 2111450      | 2111893    | +                      | fliJ                    | flagellar biosynthesis chaperone                          |
| i02_2175         | CDS         | 2111890      | 2113017    | +                      | fliK                    | flagellar hook-length control protein                     |
| i02_2176         | CDS         | 2113122      | 2113586    | +                      | fliL                    | flagellar basal body-associated protein FliL              |
| i02_2177         | CDS         | 2113546      | 2114595    | +                      | fliM                    | flagellar motor switch protein FliM                       |
| i02_2178         | CDS         | 2114592      | 2115005    | +                      | fliN                    | flagellar motor switch protein FliN                       |
| i02_2179         | CDS         | 2115005      | 2115373    | +                      | fliO                    | flagellar biosynthesis protein FliO                       |
| i02_2180         | CDS         | 2115373      | 2116110    | +                      | fliP                    | flagellar biosynthesis protein FliP                       |
| i02_2181         | CDS         | 2116120      | 2116389    | +                      | fliQ                    | flagellar biosynthesis protein FliQ                       |
| i02_2182         | CDS         | 2116398      | 2117183    | +                      | fliR                    | flagellar biosynthesis protein FliR                       |
| i02_2183         | CDS         | 2117473      | 2118096    | +                      | rcaA                    | colanic acid capsular biosynthesis activation protein     |
| i02_2184         | CDS         | 2118173      | 2118448    | +                      | /                       | hypothetical protein                                      |
| i02_2185         | CDS         | 2118476      | 2118718    | +                      | yodD                    | hypothetical protein                                      |
| i02_2186         | CDS         | 2119016      | 2119831    | +                      | yedP                    | mannosyl-3-phosphoglycerate phosphatase                   |
| i02_2187         | CDS         | 2119828      | 2121537    | -                      | yedQ                    | hypothetical protein                                      |

| Locus_tag | Type | start   | End     | +/- <sup>a</sup> | Gene <sup>b</sup> | Product                                    |
|-----------|------|---------|---------|------------------|-------------------|--------------------------------------------|
| i02_2188  | CDS  | 2121443 | 2121631 | -                | /                 | hypothetical protein                       |
| i02_2189  | CDS  | 2121693 | 2121875 | -                | yodC              | hypothetical protein                       |
| i02_2190  | CDS  | 2121954 | 2122871 | -                | yedI              | hypothetical protein                       |
| i02_2191  | CDS  | 2123044 | 2123964 | +                | yedA              | hypothetical protein                       |
| i02_2192  | CDS  | 2123953 | 2124423 | -                | vsr               | very short patch repair protein            |
| i02_2193  | CDS  | 2124404 | 2125822 | -                | dcm               | DNA cytosine methylase                     |
| i02_2194  | CDS  | 2125934 | 2126611 | -                | yedJ              | hypothetical protein                       |
| i02_2195  | CDS  | 2126624 | 2127007 | -                | yedR              | hypothetical protein                       |
| i02_2196  | CDS  | 2127486 | 2128613 | +                | /                 | Outer membrane protein N precursor         |
| i02_2197  | CDS  | 2129045 | 2129188 | +                | /                 | conserved hypothetical protein             |
| i02_2198  | CDS  | 2129209 | 2130060 | +                | yedU              | chaperone protein HchA                     |
| i02_2199  | CDS  | 2130168 | 2131526 | -                | yedV              | putative sensor-like histidine kinase yedV |
| i02_2200  | CDS  | 2131526 | 2132308 | -                | yedW              | transcriptional regulatory protein YedW    |
| i02_2201  | CDS  | 2132330 | 2132743 | +                | /                 | transthyretin-like protein precursor       |
| i02_2202  | CDS  | 2132852 | 2133856 | +                | yedY              | putative sulfite oxidase subunit YedY      |
| i02_2203  | CDS  | 2133857 | 2134492 | +                | yedZ              | putative sulfite oxidase subunit YedZ      |
| i02_2204  | CDS  | 2134750 | 2135400 | +                | yodA              | hypothetical protein                       |
| i02_2205  | CDS  | 2135436 | 2135765 | +                | /                 | hypothetical protein                       |
| i02_2206  | CDS  | 2136248 | 2137468 | +                | /                 | P4 family integrase                        |
| i02_2207  | CDS  | 2137582 | 2139402 | +                | /                 | hypothetical protein                       |
| i02_2208  | CDS  | 2139517 | 2140980 | -                | /                 | PilV-like protein                          |
| i02_2209  | CDS  | 2141033 | 2141590 | -                | /                 | putative type IV pilin protein precursor   |
| i02_2210  | CDS  | 2141989 | 2142303 | -                | /                 | hypothetical protein                       |
| i02_2211  | CDS  | 2142940 | 2144442 | +                | /                 | hypothetical protein                       |
| i02_2212  | CDS  | 2144499 | 2145422 | +                | /                 | hypothetical protein                       |
| i02_2213  | CDS  | 2145554 | 2146063 | -                | /                 | hypothetical protein                       |
| i02_2214  | CDS  | 2146200 | 2147036 | +                | /                 | hypothetical protein                       |
| i02_2215  | CDS  | 2147382 | 2147957 | -                | /                 | hypothetical protein                       |
| i02_2216  | CDS  | 2147998 | 2148135 | -                | /                 | hypothetical protein                       |
| i02_2217  | CDS  | 2148329 | 2148817 | +                | /                 | hypothetical protein                       |
| i02_2218  | CDS  | 2148807 | 2149019 | +                | /                 | hypothetical protein                       |
| i02_2219  | CDS  | 2149048 | 2149215 | +                | /                 | hypothetical protein                       |
| i02_2220  | CDS  | 2149307 | 2150488 | -                | /                 | hypothetical protein                       |
| i02_2221  | CDS  | 2150540 | 2151502 | -                | /                 | hypothetical protein                       |
| i02_2222  | CDS  | 2151850 | 2151972 | +                | /                 | conserved hypothetical protein             |
| i02_2223  | CDS  | 2152855 | 2153436 | +                | /                 | hypothetical protein                       |
| i02_2224  | CDS  | 2153521 | 2154252 | -                | /                 | hypothetical protein                       |
| i02_2225  | CDS  | 2154251 | 2154367 | +                | /                 | hypothetical protein                       |
| i02_2226  | CDS  | 2154426 | 2154905 | +                | /                 | hypothetical protein                       |
| i02_2227  | CDS  | 2155064 | 2155468 | +                | /                 | DNA-binding protein H-NS                   |
| i02_2228  | CDS  | 2155532 | 2155912 | -                | /                 | hypothetical protein                       |
| i02_2229  | CDS  | 2155991 | 2156233 | -                | /                 | hypothetical protein                       |
| i02_2230  | CDS  | 2156306 | 2156602 | -                | /                 | hypothetical protein                       |
| i02_2231  | CDS  | 2156655 | 2156957 | -                | /                 | hypothetical protein                       |
| i02_2232  | CDS  | 2157027 | 2157245 | -                | /                 | putative regulatory protein                |
| i02_2233  | CDS  | 2157462 | 2158355 | -                | /                 | hypothetical protein                       |
| i02_2234  | CDS  | 2158721 | 2159557 | +                | yeel              | hypothetical protein                       |
| i02_2235  | CDS  | 2160114 | 2161157 | +                | /                 | prophage P4 integrase                      |
| i02_2236  | CDS  | 2161351 | 2162655 | -                | /                 | salicylate synthase Irp9                   |
| i02_2237  | CDS  | 2162683 | 2164086 | -                | /                 | putative cytoplasmic transmembrane protein |
| i02_2238  | CDS  | 2163956 | 2165785 | -                | /                 | ABC transporter                            |
| i02_2239  | CDS  | 2165745 | 2167547 | -                | /                 | putative inner membrane ABC-transporter    |
| i02_2240  | CDS  | 2167714 | 2168673 | +                | /                 | putative AraC type regulator               |
| i02_2241  | CDS  | 2168846 | 2174980 | +                | /                 | phenyloxazoline synthase MbtB              |
| i02_2242  | CDS  | 2175068 | 2184559 | +                | /                 | yersiniabactin biosynthetic protein        |
| i02_2244  | CDS  | 2184556 | 2185656 | +                | /                 | hypothetical protein                       |
| i02_2245  | CDS  | 2185653 | 2186456 | +                | /                 | putative thioesterase                      |
| i02_2246  | CDS  | 2186460 | 2188037 | +                | /                 | 2,3-dihydroxybenzoate-AMP ligase           |

| Locus_tag | Type   | start   | End     | +/- <sup>a</sup> | Gene <sup>b</sup> | Product                                         |
|-----------|--------|---------|---------|------------------|-------------------|-------------------------------------------------|
| i02_2247  | CDS    | 2188168 | 2190189 | +                | /                 | putative pesticin receptor precursor            |
| i02_2248  | CDS    | 2190779 | 2191585 | +                | /                 | hypothetical protein                            |
| i02_2249  | CDS    | 2191512 | 2191682 | +                | /                 | hypothetical protein                            |
| i02_2250  | CDS    | 2191718 | 2193187 | +                | /                 | hypothetical protein                            |
| i02_2250a | CDS    | 2193200 | 2193676 | +                | /                 | hypothetical protein                            |
| i02_2251  | CDS    | 2193804 | 2194856 | -                | /                 | hypothetical protein                            |
| i02_2252  | CDS    | 2195171 | 2196487 | +                | shiA              | shikimate transporter                           |
| i02_2253  | CDS    | 2196541 | 2198043 | +                | amn               | AMP nucleosidase                                |
| i02_2254  | CDS    | 2198386 | 2199102 | +                | yeeN              | hypothetical protein                            |
| i02_2255  | CDS    | 2199158 | 2199445 | -                | /                 | hypothetical protein                            |
| i02_2256  | CDS    | 2199958 | 2200875 | +                | nac               | nitrogen assimilation transcriptional regulator |
| i02_2257  | CDS    | 2200977 | 2201927 | +                | cbl               | transcriptional regulator Cbl                   |
| i02_2258  | CDS    | 2202048 | 2203688 | +                | yeeO              | hypothetical protein                            |
| i02_2259  | CDS    | 2204026 | 2205297 | +                | /                 | prophage P4 integrase                           |
| i02_2260  | CDS    | 2205577 | 2206089 | -                | /                 | hypothetical protein                            |
| i02_2261  | CDS    | 2206124 | 2206846 | -                | /                 | putative thioesterase                           |
| i02_2262  | CDS    | 2206839 | 2208353 | -                | /                 | hypothetical protein                            |
| i02_2263  | CDS    | 2208366 | 2210825 | -                | /                 | putative polyketide synthase                    |
| i02_2264  | CDS    | 2210856 | 2215310 | -                | /                 | putative peptide synthetase                     |
| i02_2266  | CDS    | 2215220 | 2216659 | -                | /                 | hypothetical protein                            |
| i02_2267  | CDS    | 2216721 | 2218208 | -                | /                 | putative amidase                                |
| i02_2268  | CDS    | 2218177 | 2224641 | -                | /                 | putative peptide synthetase                     |
| i02_2269  | CDS    | 2224652 | 2231152 | -                | /                 | putative peptide synthetase                     |
| i02_2270  | CDS    | 2231196 | 2234228 | -                | /                 | putative polyketide synthase                    |
| i02_2271  | CDS    | 2234278 | 2239089 | -                | /                 | hypothetical protein                            |
| i02_2273  | CDS    | 2239122 | 2240390 | -                | /                 | putative transacylase                           |
| i02_2274  | CDS    | 2240387 | 2241415 | -                | /                 | putative acyl-coa dehydrogenase                 |
| i02_2275  | CDS    | 2241521 | 2241769 | -                | /                 | hypothetical protein                            |
| i02_2276  | CDS    | 2241799 | 2242668 | -                | /                 | putative 3-hydroxyacyl-CoA dehydrogenase        |
| i02_2277  | CDS    | 2242678 | 2245287 | -                | /                 | putative polyketide synthase                    |
| i02_2279  | CDS    | 2245319 | 2254948 | -                | /                 | putative peptide/polyketide synthase            |
| i02_2280  | CDS    | 2255578 | 2256312 | +                | /                 | hypothetical protein                            |
| i02_2281  | CDS    | 2256458 | 2256724 | +                | /                 | transposase                                     |
| i02_2282  | CDS    | 2256721 | 2256834 | -                | /                 | hypothetical protein                            |
| i02_2283  | CDS    | 2256829 | 2257308 | +                | /                 | transposase                                     |
| i02_2284  | CDS    | 2257299 | 2257526 | +                | /                 | transposase                                     |
| i02_2285  | CDS    | 2257616 | 2258041 | -                | /                 | hypothetical protein                            |
| i02_2286  | CDS    | 2258333 | 2259268 | -                | erfK              | hypothetical protein                            |
| i02_2287  | CDS    | 2259330 | 2260409 | -                | cobT              | nicotinate-nucleotide--dimethylbenzimidazole    |
| i02_2288  | CDS    | 2260421 | 2261200 | -                | cobS              | cobalamin synthase                              |
| i02_2289  | CDS    | 2261161 | 2261706 | -                | cobU              | adenosylcobinamide                              |
| i02_2290  | CDS    | 2261858 | 2261980 | -                | /                 | hypothetical protein                            |
| i02_2291  | CDS    | 2262171 | 2262335 | -                | /                 | hypothetical protein                            |
| i02_2292  | CDS    | 2263378 | 2265525 | +                | /                 | putative outer membrane receptor for iron       |
| i02_2293  | CDS    | 2265513 | 2265641 | +                | /                 | hypothetical protein                            |
| i02_2294  | CDS    | 2265896 | 2266540 | -                | /                 | hypothetical protein                            |
| i02_2295  | CDS    | 2266525 | 2267814 | -                | /                 | hypothetical protein                            |
| i02_2296  | CDS    | 2268739 | 2269449 | +                | /                 | hypothetical protein                            |
| i02_2297  | CDS    | 2270694 | 2271218 | +                | /                 | putative transferase                            |
| i02_2298  | CDS    | 2271172 | 2271993 | +                | /                 | hypothetical protein                            |
| i02_2299  | CDS    | 2272562 | 2272876 | -                | /                 | hypothetical protein                            |
| i02_2300  | CDS    | 2272995 | 2274209 | +                | /                 | putative carbohydrate kinase                    |
| i02_2301  | CDS    | 2274223 | 2274981 | +                | /                 | hypothetical protein                            |
| i02_2302  | CDS    | 2275035 | 2276000 | +                | /                 | hypothetical protein                            |
| i02_2303  | CDS    | 2276003 | 2277037 | +                | /                 | putative phosphotriesterase-related protein     |
| i02_2304  | pseudo | 2277689 | 2279068 | -                | /                 | transposase                                     |
| i02_2305  | CDS    | 2279352 | 2279849 | -                | /                 | hypothetical protein                            |
| i02_2306  | CDS    | 2279750 | 2280154 | -                | /                 | hypothetical protein                            |



| Locus_tag | Type | start   | End     | +/- <sup>a</sup> | Gene <sup>b</sup> | Product                                                                                                  |
|-----------|------|---------|---------|------------------|-------------------|----------------------------------------------------------------------------------------------------------|
| i02_2307  | CDS  | 2280317 | 2280922 | -                | /                 | hypothetical protein                                                                                     |
| i02_2308  | CDS  | 2281452 | 2281628 | -                | /                 | hypothetical protein                                                                                     |
| i02_2309  | CDS  | 2281579 | 2281959 | +                | /                 | hypothetical protein                                                                                     |
| i02_2310  | CDS  | 2282392 | 2283588 | +                | /                 | transposase                                                                                              |
| i02_2312  | CDS  | 2283616 | 2283990 | +                | /                 | hypothetical protein                                                                                     |
| i02_2313  | CDS  | 2284069 | 2284686 | +                | /                 | hypothetical protein                                                                                     |
| i02_2314  | CDS  | 2285712 | 2286494 | -                | /                 | transposase/IS protein                                                                                   |
| i02_2315  | CDS  | 2286491 | 2287513 | -                | /                 | transposase                                                                                              |
| i02_2316  | CDS  | 2287608 | 2287838 | +                | /                 | putative transposase subunit                                                                             |
| i02_2317  | CDS  | 2288064 | 2288441 | -                | /                 | hypothetical protein                                                                                     |
| i02_2318  | CDS  | 2289010 | 2289285 | +                | /                 | hypothetical protein                                                                                     |
| i02_2319  | CDS  | 2291023 | 2291790 | -                | /                 | putative ABC transporter                                                                                 |
| i02_2320  | CDS  | 2291787 | 2292845 | -                | /                 | ABC transporter                                                                                          |
| i02_2321  | CDS  | 2292864 | 2293856 | -                | /                 | periplasmic binding protein                                                                              |
| i02_2322  | CDS  | 2293864 | 2296029 | -                | /                 | TonB dependent receptor                                                                                  |
| i02_2323  | CDS  | 2297109 | 2299493 | +                | /                 | hypothetical protein                                                                                     |
| i02_2325  | CDS  | 2299490 | 2300395 | +                | /                 | hypothetical protein                                                                                     |
| i02_2326  | CDS  | 2300392 | 2301462 | +                | /                 | hypothetical protein                                                                                     |
| i02_2327  | CDS  | 2301490 | 2302275 | +                | /                 | hypothetical protein                                                                                     |
| i02_2328  | CDS  | 2302291 | 2302701 | +                | /                 | hypothetical protein                                                                                     |
| i02_2329  | CDS  | 2302922 | 2303743 | +                | /                 | hypothetical protein                                                                                     |
| i02_2330  | CDS  | 2303888 | 2304427 | -                | /                 | hypothetical protein                                                                                     |
| i02_2331  | CDS  | 2304880 | 2305101 | +                | /                 | hypothetical protein                                                                                     |
| i02_2332  | CDS  | 2305175 | 2305543 | +                | /                 | hypothetical protein                                                                                     |
| i02_2333  | CDS  | 2305632 | 2306006 | +                | /                 | hypothetical protein                                                                                     |
| i02_2334  | CDS  | 2306003 | 2306197 | +                | yeeW              | hypothetical protein                                                                                     |
| i02_2335  | CDS  | 2306638 | 2306994 | +                | yoeF              | hypothetical protein                                                                                     |
| i02_2336  | CDS  | 2307095 | 2307490 | -                | yeeX              | hypothetical protein                                                                                     |
| i02_2337  | CDS  | 2307596 | 2308654 | -                | yeeA              | hypothetical protein                                                                                     |
| i02_2338  | CDS  | 2308852 | 2309325 | -                | sbmC              | DNA gyrase inhibitor                                                                                     |
| i02_2339  | CDS  | 2309444 | 2310616 | -                | dacD              | D-alanyl-D-alanine carboxypeptidase                                                                      |
| i02_2340  | CDS  | 2310771 | 2312246 | +                | sbcB              | exonuclease I                                                                                            |
| i02_2341  | CDS  | 2312320 | 2313684 | -                | yeeF              | putative transport protein YeeF                                                                          |
| i02_2342  | CDS  | 2313945 | 2314895 | -                | yeeY              | putative transcriptional regulator YeeY                                                                  |
| i02_2343  | CDS  | 2314920 | 2315744 | -                | /                 | hypothetical protein                                                                                     |
| i02_2344  | CDS  | 2315827 | 2316081 | -                | /                 | hypothetical protein                                                                                     |
| i02_2345  | CDS  | 2316078 | 2316356 | -                | yefM              | antitoxin YefM                                                                                           |
| i02_2346  | CDS  | 2316808 | 2317707 | +                | hisG              | ATP phosphoribosyltransferase                                                                            |
| i02_2347  | CDS  | 2317704 | 2319017 | +                | hisD              | histidinol dehydrogenase                                                                                 |
| i02_2348  | CDS  | 2319014 | 2320084 | +                | hisC              | histidinol-phosphate aminotransferase                                                                    |
| i02_2349  | CDS  | 2320084 | 2321151 | +                | hisB              | imidazole glycerol-phosphate                                                                             |
| i02_2350  | CDS  | 2321151 | 2321741 | +                | hisH              | imidazole glycerol phosphate synthase subunit                                                            |
| i02_2351  | CDS  | 2321738 | 2322478 | +                | hisA              | N-(5'-phospho-L-ribosyl-formimino)-5-amino-1-(5'-phosphoribosyl)-4-imidazolecarboxamide isomerase (HisA) |
| i02_2352  | CDS  | 2322460 | 2323236 | +                | hisF              | imidazole glycerol phosphate synthase subunit                                                            |
| i02_2353  | CDS  | 2323230 | 2323841 | +                | hisI              | phosphoribosyl-AMP cyclohydrolase / phosphoribosyl-ATP pyrophosphatase                                   |
| i02_2354  | CDS  | 2324027 | 2325040 | -                | wzzB              | chain length determinant protein                                                                         |
| i02_2355  | CDS  | 2325147 | 2326313 | -                | ugd               | UDP-glucose 6-dehydrogenase                                                                              |
| i02_2356  | CDS  | 2326563 | 2327969 | -                | gnd               | 6-phosphogluconate dehydrogenase                                                                         |
| i02_2357  | CDS  | 2328132 | 2329502 | -                | manB              | phosphomannomutase                                                                                       |
| i02_2358  | CDS  | 2329585 | 2331036 | -                | /                 | mannose-1-phosphate guanylyltransferase                                                                  |
| i02_2359  | CDS  | 2331014 | 2332129 | -                | /                 | hypothetical protein                                                                                     |
| i02_2360  | CDS  | 2332240 | 2333247 | -                | /                 | UDP-glucose 4-epimerase                                                                                  |
| i02_2361  | CDS  | 2333264 | 2334409 | -                | /                 | hypothetical protein                                                                                     |
| i02_2362  | CDS  | 2334396 | 2335478 | -                | /                 | glycosyl transferase                                                                                     |
| i02_2363  | CDS  | 2335424 | 2336293 | -                | /                 | glycosyl transferase                                                                                     |

| Locus_tag | Type | start   | End     | +/- <sup>a</sup> | Gene <sup>b</sup> | Product                                                |
|-----------|------|---------|---------|------------------|-------------------|--------------------------------------------------------|
| i02_2364  | CDS  | 2336290 | 2337651 | -                | /                 | hypothetical protein                                   |
| i02_2365  | CDS  | 2337633 | 2338889 | -                | /                 | hypothetical protein                                   |
| i02_2366  | CDS  | 2339246 | 2340151 | -                | galF              | UTP--glucose-1-phosphate uridylyltransferase           |
| i02_2367  | CDS  | 2340314 | 2341708 | -                | wcaM              | putative colanic acid biosynthesis protein             |
| i02_2368  | CDS  | 2341719 | 2342939 | -                | wcaL              | putative colanic acid biosynthesis glycosyltransferase |
| i02_2369  | CDS  | 2342936 | 2344216 | -                | wcaK              | putative pyruvyl transferase                           |
| i02_2370  | CDS  | 2344878 | 2346356 | -                | wzxC              | colanic acid exporter                                  |
| i02_2371  | CDS  | 2346358 | 2347752 | -                | wcaJ              | putative UDP-glucose lipid carrier transferase         |
| i02_2372  | CDS  | 2347808 | 2349226 | -                | cpsG              | phosphomannomutase                                     |
| i02_2373  | CDS  | 2349204 | 2349362 | +                | /                 | hypothetical protein                                   |
| i02_2374  | CDS  | 2349371 | 2350807 | -                | cpsB              | mannose-1-phosphate guanylyltransferase                |
| i02_2375  | CDS  | 2350810 | 2352033 | -                | wcaI              | putative glycosyl transferase                          |
| i02_2376  | CDS  | 2352030 | 2352512 | -                | wcaH              | GDP-mannose mannosyl hydrolase                         |
| i02_2377  | CDS  | 2352512 | 2353477 | -                | wcaG              | GDP-4-keto-6-L-galactose reductase                     |
| i02_2378  | CDS  | 2353480 | 2354601 | -                | gmd               | GDP-mannose 4,6-dehydratase                            |
| i02_2379  | CDS  | 2354628 | 2355176 | -                | wcaF              | putative colanic acid biosynthesis                     |
| i02_2380  | CDS  | 2355192 | 2355938 | -                | wcaE              | putative glycosyl transferase                          |
| i02_2381  | CDS  | 2355949 | 2357166 | -                | wcaD              | putative colanic acid biosynthesis protein             |
| i02_2382  | CDS  | 2357141 | 2358358 | -                | wcaC              | putative glycosyl transferase                          |
| i02_2383  | CDS  | 2358355 | 2358843 | -                | wcaB              | putative colanic acid biosynthesis                     |
| i02_2384  | CDS  | 2358846 | 2359685 | -                | wcaA              | putative glycosyl transferase                          |
| i02_2385  | CDS  | 2359778 | 2361976 | -                | /                 | tyrosine kinase                                        |
| i02_2386  | CDS  | 2361943 | 2362386 | -                | /                 | hypothetical protein                                   |
| i02_2387  | CDS  | 2362392 | 2363510 | -                | /                 | hypothetical protein                                   |
| i02_2388  | CDS  | 2364124 | 2365773 | +                | yegH              | hypothetical protein                                   |
| i02_2389  | CDS  | 2365841 | 2367694 | -                | asmA              | putative assembly protein                              |
| i02_2390  | CDS  | 2367716 | 2368297 | -                | dcd               | deoxycytidine triphosphate deaminase                   |
| i02_2391  | CDS  | 2368389 | 2369030 | -                | udk               | uridine kinase                                         |
| i02_2392  | CDS  | 2369348 | 2372665 | +                | yegE              | putative sensor protein                                |
| i02_2393  | CDS  | 2372775 | 2373623 | -                | alkA              | 3-methyl-adenine DNA glycosylase II                    |
| i02_2394  | CDS  | 2373757 | 2375109 | +                | yegD              | putative chaperone                                     |
| i02_2396  | CDS  | 2375122 | 2377071 | -                | yegI              | hypothetical protein                                   |
| i02_2397  | CDS  | 2377059 | 2377820 | -                | yegK              | hypothetical protein                                   |
| i02_2398  | CDS  | 2377817 | 2378476 | -                | yegL              | hypothetical protein                                   |
| i02_2399  | CDS  | 2379210 | 2380604 | +                | yegM              | multidrug efflux system subunit MdtA                   |
| i02_2400  | CDS  | 2380604 | 2383726 | +                | yegN              | multidrug efflux system subunit MdtB                   |
| i02_2401  | CDS  | 2383727 | 2386804 | +                | yegO              | multidrug efflux system subunit MdtC                   |
| i02_2402  | CDS  | 2386805 | 2388220 | +                | yegB              | multidrug efflux system protein MdtE                   |
| i02_2403  | CDS  | 2388217 | 2389620 | +                | baeS              | signal transduction histidine-protein kinase           |
| i02_2404  | CDS  | 2389617 | 2390339 | +                | baeR              | DNA-binding transcriptional regulator BaeR             |
| i02_2405  | CDS  | 2390480 | 2390851 | +                | yegP              | hypothetical protein                                   |
| i02_2406  | CDS  | 2390976 | 2391590 | -                | /                 | hypothetical protein                                   |
| i02_2407  | CDS  | 2391642 | 2393789 | -                | /                 | hypothetical protein                                   |
| i02_2409  | CDS  | 2393761 | 2394477 | -                | /                 | hypothetical protein                                   |
| i02_2410  | CDS  | 2394477 | 2395691 | -                | /                 | hypothetical protein                                   |
| i02_2411  | CDS  | 2396179 | 2397540 | +                | yegQ              | putative protease yegQ                                 |
| i02_2412  | CDS  | 2397480 | 2397617 | -                | /                 | hypothetical protein                                   |
| i02_2413  | CDS  | 2397895 | 2398020 | -                | /                 | hypothetical protein                                   |
| i02_2414  | CDS  | 2398040 | 2398372 | -                | yegR              | hypothetical protein                                   |
| i02_2415  | CDS  | 2398772 | 2399671 | +                | yegS              | lipid kinase                                           |
| i02_2416  | CDS  | 2399753 | 2400532 | -                | /                 | hypothetical protein                                   |
| i02_2417  | CDS  | 2400632 | 2401672 | -                | gatD              | galactitol-1-phosphate dehydrogenase                   |
| i02_2418  | CDS  | 2401720 | 2403075 | -                | gatC              | PTS system, galactitol-specific IIC component          |
| i02_2419  | CDS  | 2403079 | 2403363 | -                | gatB              | galactitol-specific PTS system component IIB           |
| i02_2420  | CDS  | 2403394 | 2403846 | -                | gatA              | galactitol-specific PTS system component IIA           |
| i02_2421  | CDS  | 2403856 | 2405118 | -                | gatZ              | putative tagatose 6-phosphate kinase gatZ              |
| i02_2422  | CDS  | 2405147 | 2406001 | -                | gatY              | tagatose-bisphosphate aldolase                         |

| Locus_tag | Type | start   | End     | +/- <sup>a</sup> | Gene <sup>b</sup> | Product                                     |
|-----------|------|---------|---------|------------------|-------------------|---------------------------------------------|
| i02_2423  | CDS  | 2406228 | 2407352 | -                | /                 | fructose-bisphosphate aldolase              |
| i02_2424  | CDS  | 2407339 | 2407485 | +                | /                 | hypothetical protein                        |
| i02_2425  | CDS  | 2407537 | 2408814 | +                | yegT              | putative nucleoside transporter yegT        |
| i02_2426  | CDS  | 2408811 | 2409815 | +                | yegU              | hypothetical protein                        |
| i02_2427  | CDS  | 2409812 | 2410777 | +                | yegV              | putative sugar kinase yegV                  |
| i02_2428  | CDS  | 2410751 | 2411497 | -                | yegW              | putative transcriptional regulator YegW     |
| i02_2429  | CDS  | 2411549 | 2412376 | -                | yegX              | hypothetical protein                        |
| i02_2430  | CDS  | 2412432 | 2413232 | -                | thiD              | phosphomethylpyrimidine kinase              |
| i02_2431  | CDS  | 2413229 | 2414017 | -                | thiM              | hydroxyethylthiazole kinase                 |
| i02_2432  | CDS  | 2414240 | 2414512 | -                | yohL              | hypothetical protein                        |
| i02_2433  | CDS  | 2414633 | 2415457 | +                | yohM              | nickel/cobalt efflux protein RcnA           |
| i02_2434  | CDS  | 2415496 | 2416014 | +                | yohN              | hypothetical protein                        |
| i02_2435  | CDS  | 2416096 | 2417130 | -                | yehA              | hypothetical protein                        |
| i02_2436  | CDS  | 2417146 | 2419641 | -                | yehB              | outer membrane usher protein yehB precursor |
| i02_2437  | CDS  | 2419642 | 2420316 | -                | yehC              | fimbrial chaperone yehC precursor           |
| i02_2438  | CDS  | 2420397 | 2420939 | -                | yehD              | hypothetical protein                        |
| i02_2439  | CDS  | 2421233 | 2421514 | -                | yehE              | hypothetical protein                        |
| i02_2440  | CDS  | 2421777 | 2422916 | -                | mrp               | putative ATPase                             |
| i02_2441  | CDS  | 2423009 | 2425051 | +                | metG              | methionyl-tRNA synthetase                   |
| i02_2442  | CDS  | 2425192 | 2428980 | +                | /                 | hypothetical protein                        |
| i02_2443  | CDS  | 2428990 | 2432622 | +                | yehI              | hypothetical protein                        |
| i02_2444  | CDS  | 2430062 | 2430313 | -                | /                 | hypothetical protein                        |
| i02_2445  | CDS  | 2431474 | 2431632 | -                | /                 | hypothetical protein                        |
| i02_2446  | CDS  | 2432683 | 2432868 | +                | /                 | yehK protein                                |
| i02_2447  | CDS  | 2433565 | 2434719 | +                | yehL              | hypothetical protein                        |
| i02_2448  | CDS  | 2434655 | 2437009 | +                | yehM              | hypothetical protein                        |
| i02_2449  | CDS  | 2436795 | 2438138 | +                | yehP              | hypothetical protein                        |
| i02_2450  | CDS  | 2438135 | 2440138 | +                | yehQ              | hypothetical protein                        |
| i02_2451  | CDS  | 2440251 | 2440724 | +                | yehR              | lipoprotein yehR precursor                  |
| i02_2452  | CDS  | 2440765 | 2441292 | -                | yehS              | hypothetical protein                        |
| i02_2453  | CDS  | 2441282 | 2442016 | -                | yehT              | putative two-component response-regulator   |
| i02_2454  | CDS  | 2441998 | 2443698 | -                | yehU              | hypothetical protein                        |
| i02_2455  | CDS  | 2443905 | 2444636 | +                | yehV              | MerR-like regulator A                       |
| i02_2456  | CDS  | 2444784 | 2445515 | -                | yehW              | ABC transporter permease                    |
| i02_2457  | CDS  | 2445520 | 2446446 | -                | yehX              | ABC transporter ATP-binding protein         |
| i02_2458  | CDS  | 2446439 | 2447596 | -                | yehY              | ABC transporter permease                    |
| i02_2459  | CDS  | 2447603 | 2448520 | -                | yehZ              | hypothetical protein                        |
| i02_2462  | CDS  | 2448551 | 2448703 | -                | /                 | hypothetical protein                        |
| i02_2463  | CDS  | 2448710 | 2451079 | -                | bgIX              | periplasmic beta-glucosidase precursor      |
| i02_2464  | CDS  | 2451203 | 2452918 | +                | dld               | D-lactate dehydrogenase                     |
| i02_2465  | CDS  | 2452957 | 2453898 | -                | pbpG              | D-alanyl-D-alanine endopeptidase            |
| i02_2466  | CDS  | 2453968 | 2454090 | -                | /                 | hypothetical protein                        |
| i02_2467  | CDS  | 2454063 | 2454674 | -                | yohC              | hypothetical protein                        |
| i02_2468  | CDS  | 2454784 | 2455398 | +                | yohD              | hypothetical protein                        |
| i02_2469  | CDS  | 2455518 | 2455904 | -                | /                 | hypothetical protein                        |
| i02_2469a | CDS  | 2455971 | 2456291 | -                | /                 | hypothetical protein                        |
| i02_2470  | CDS  | 2456332 | 2457849 | -                | yohG              | multidrug resistance outer membrane protein |
| i02_2471  | CDS  | 2458462 | 2459478 | -                | yohI              | tRNA-dihydrouridine synthase C              |
| i02_2472  | CDS  | 2459615 | 2460049 | +                | yohJ              | hypothetical protein                        |
| i02_2473  | CDS  | 2460046 | 2460741 | +                | yohK              | hypothetical protein                        |
| i02_2474  | CDS  | 2460871 | 2461755 | +                | cdd               | cytidine deaminase                          |
| i02_2476  | CDS  | 2461905 | 2462624 | +                | sanA              | hypothetical protein                        |
| i02_2477  | CDS  | 2462627 | 2462866 | +                | yehS              | hypothetical protein                        |
| i02_2478  | CDS  | 2463060 | 2464298 | +                | yehT              | putative oxidoreductase                     |
| i02_2479  | CDS  | 2464292 | 2465527 | +                | yehA              | dihydropyrimidine dehydrogenase             |
| i02_2480  | CDS  | 2465549 | 2465692 | +                | /                 | hypothetical protein                        |
| i02_2481  | CDS  | 2465770 | 2466780 | -                | mgIC              | beta-methylgalactoside transporter          |
| i02_2482  | CDS  | 2466796 | 2468316 | -                | mgIA              | galactose/methyl galactoside transporter    |

| Locus_tag | Type | start   | End     | +/- <sup>a</sup> | Gene <sup>b</sup> | Product                                        |
|-----------|------|---------|---------|------------------|-------------------|------------------------------------------------|
| i02_2483  | CDS  | 2468377 | 2469375 | -                | mgIB              | D-galactose-binding periplasmic protein        |
| i02_2484  | CDS  | 2469655 | 2470701 | -                | galS              | DNA-binding transcriptional regulator GalS     |
| i02_2485  | CDS  | 2470685 | 2470888 | +                | /                 | hypothetical protein                           |
| i02_2486  | CDS  | 2470837 | 2471994 | -                | yeiB              | hypothetical protein                           |
| i02_2487  | CDS  | 2472011 | 2472679 | -                | foIE              | GTP cyclohydrolase I                           |
| i02_2488  | CDS  | 2472937 | 2473773 | +                | yeiG              | hypothetical protein                           |
| i02_2489  | CDS  | 2473805 | 2475796 | -                | cirA              | colicin I receptor                             |
| i02_2490  | CDS  | 2476088 | 2477557 | -                | lysP              | lysine transporter                             |
| i02_2491  | CDS  | 2477762 | 2478643 | -                | yeiE              | putative DNA-binding transcriptional regulator |
| i02_2492  | CDS  | 2478742 | 2479791 | +                | yeiH              | hypothetical protein                           |
| i02_2493  | CDS  | 2479865 | 2480722 | +                | nfo               | endonuclease IV                                |
| i02_2494  | CDS  | 2480726 | 2481814 | +                | yeiI              | hypothetical protein                           |
| i02_2495  | CDS  | 2481996 | 2482112 | -                | /                 | hypothetical protein                           |
| i02_2497  | CDS  | 2482082 | 2483023 | -                | rihB              | ribonucleoside hydrolase 2                     |
| i02_2498  | CDS  | 2483153 | 2483851 | +                | yeiL              | DNA-binding transcriptional activator YeiL     |
| i02_2499  | CDS  | 2483918 | 2485168 | -                | yeiM              | putative transport protein YeiM                |
| i02_2500  | CDS  | 2485262 | 2486200 | -                | yeiN              | hypothetical protein                           |
| i02_2501  | CDS  | 2486188 | 2487243 | -                | yeiC              | hypothetical protein                           |
| i02_2502  | CDS  | 2487585 | 2489276 | -                | fruA              | fructose-specific PTS system IIBC component    |
| i02_2503  | CDS  | 2489293 | 2490231 | -                | fruK              | 1-phosphofructokinase                          |
| i02_2504  | CDS  | 2490231 | 2491361 | -                | fruB              | fructose PTS transporter                       |
| i02_2505  | CDS  | 2491526 | 2491657 | +                | /                 | hypothetical protein                           |
| i02_2506  | CDS  | 2491728 | 2492909 | +                | yeiO              | sugar efflux transporter B                     |
| i02_2507  | CDS  | 2492906 | 2493094 | -                | /                 | hypothetical protein                           |
| i02_2508  | CDS  | 2493060 | 2493887 | +                | yeiP              | elongation factor P                            |
| i02_2509  | CDS  | 2494101 | 2495576 | +                | yeiQ              | oxidoreductase yeiQ                            |
| i02_2510  | CDS  | 2495694 | 2496680 | +                | yeiR              | hypothetical protein                           |
| i02_2511  | CDS  | 2496683 | 2497432 | +                | yeiU              | hypothetical protein                           |
| i02_2512  | CDS  | 2497844 | 2498410 | +                | spr               | putative outer membrane lipoprotein            |
| i02_2513  | CDS  | 2498591 | 2500147 | +                | rtn               | hypothetical protein                           |
| i02_2514  | CDS  | 2500229 | 2502043 | +                | yejA              | hypothetical protein                           |
| i02_2515  | CDS  | 2502044 | 2503138 | +                | yejB              | ABC transporter permease                       |
| i02_2516  | CDS  | 2503138 | 2504163 | +                | yejE              | ABC transporter permease                       |
| i02_2517  | CDS  | 2504165 | 2505754 | +                | yejF              | ABC transporter ATP-binding protein            |
| i02_2518  | CDS  | 2505758 | 2506102 | -                | yejG              | hypothetical protein                           |
| i02_2519  | CDS  | 2506436 | 2507626 | -                | bcr               | bicyclomycin/multidrug efflux system           |
| i02_2520  | CDS  | 2507654 | 2508349 | -                | rsuA              | 16S rRNA pseudouridylylate synthase A          |
| i02_2521  | CDS  | 2508499 | 2510259 | +                | yejH              | hypothetical protein                           |
| i02_2522  | CDS  | 2510384 | 2510668 | +                | rplY              | 50S ribosomal protein L25                      |
| i02_2523  | CDS  | 2510807 | 2511814 | -                | yejK              | nucleoid-associated protein NdpA               |
| i02_2524  | CDS  | 2511859 | 2511975 | -                | /                 | hypothetical protein                           |
| i02_2526  | CDS  | 2511996 | 2512223 | +                | yejL              | hypothetical protein                           |
| i02_2527  | CDS  | 2512243 | 2514003 | +                | yejM              | hypothetical protein                           |
| i02_2528  | CDS  | 2514256 | 2514411 | -                | /                 | hypothetical protein                           |
| i02_2529  | CDS  | 2514493 | 2514882 | -                | /                 | hypothetical protein                           |
| i02_2530  | CDS  | 2515225 | 2515482 | -                | /                 | hypothetical protein                           |
| i02_2531  | CDS  | 2515484 | 2516161 | +                | narP              | transcriptional regulator NarP                 |
| i02_2532  | CDS  | 2516196 | 2517248 | -                | ccmH              | cytochrome c-type biogenesis protein ccmH      |
| i02_2533  | CDS  | 2517245 | 2517802 | -                | dsbE              | Thiol:disulfide interchange protein dsbE       |
| i02_2534  | CDS  | 2517799 | 2519742 | -                | ccmF              | cytochrome c-type biogenesis protein ccmF      |
| i02_2535  | CDS  | 2519739 | 2520218 | -                | ccmE              | cytochrome c-type biogenesis protein CcmE      |
| i02_2536  | CDS  | 2520215 | 2520424 | -                | ccmD              | Heme exporter protein D                        |
| i02_2537  | CDS  | 2520421 | 2521182 | -                | ccmC              | Heme exporter protein C                        |
| i02_2538  | CDS  | 2521200 | 2521862 | -                | ccmB              | Heme exporter protein B                        |
| i02_2539  | CDS  | 2521859 | 2522482 | -                | ccmA              | cytochrome c biogenesis protein CcmA           |
| i02_2540  | CDS  | 2522495 | 2523097 | -                | napC              | cytochrome c-type protein NapC                 |
| i02_2541  | CDS  | 2523107 | 2523577 | -                | napB              | citrate reductase cytochrome c-type subunit    |
| i02_2542  | CDS  | 2523553 | 2524416 | -                | napH              | quinol dehydrogenase membrane component        |

| <b>Locus_tag</b> | <b>Type</b> | <b>start</b> | <b>End</b> | <b>+/-<sup>a</sup></b> | <b>Gene<sup>b</sup></b> | <b>Product</b>                                  |
|------------------|-------------|--------------|------------|------------------------|-------------------------|-------------------------------------------------|
| i02_2543         | CDS         | 2524403      | 2525098    | -                      | napG                    | quinol dehydrogenase periplasmic component      |
| i02_2544         | CDS         | 2525105      | 2527591    | -                      | napA                    | nitrate reductase catalytic subunit             |
| i02_2545         | CDS         | 2527588      | 2527851    | -                      | napD                    | assembly protein for periplasmic nitrate        |
| i02_2546         | CDS         | 2527841      | 2528335    | -                      | napF                    | ferredoxin-type protein                         |
| i02_2547         | CDS         | 2528435      | 2528608    | +                      | /                       | hypothetical protein                            |
| i02_2548         | CDS         | 2528528      | 2528656    | -                      | /                       | hypothetical protein                            |
| i02_2549         | CDS         | 2528749      | 2529231    | +                      | eco                     | ecotin                                          |
| i02_2550         | CDS         | 2528923      | 2529381    | -                      | eco                     | ecotin precursor                                |
| i02_2551         | CDS         | 2529381      | 2531027    | -                      | yojH                    | malate:quinone oxidoreductase                   |
| i02_2552         | CDS         | 2531245      | 2532888    | -                      | yojI                    | multidrug transporter membrane                  |
| i02_2553         | CDS         | 2532964      | 2533614    | -                      | alkB                    | alkylated DNA repair protein AlkB               |
| i02_2554         | CDS         | 2533614      | 2534678    | -                      | ada                     | ADA regulatory protein                          |
| i02_2555         | CDS         | 2534752      | 2535807    | -                      | yojL                    | thiamine biosynthesis lipoprotein ApbE          |
| i02_2556         | CDS         | 2535919      | 2537046    | -                      | ompC                    | outer membrane porin protein C                  |
| i02_2557         | CDS         | 2537785      | 2540457    | +                      | yojN                    | phosphotransfer intermediate protein            |
| i02_2558         | CDS         | 2540429      | 2541124    | +                      | rcsB                    | transcriptional regulator RcsB                  |
| i02_2559         | CDS         | 2541210      | 2544059    | -                      | rcsC                    | hybrid sensory kinase in two-component          |
| i02_2560         | CDS         | 2544214      | 2546052    | +                      | atoS                    | sensory histidine kinase AtoS                   |
| i02_2561         | CDS         | 2546049      | 2547434    | +                      | atoC                    | acetoacetate metabolism regulatory protein AtoC |
| i02_2562         | CDS         | 2547630      | 2548292    | +                      | atoD                    | acetyl-CoA:acetoacetyl-CoA transferase subunit  |
| i02_2563         | CDS         | 2548292      | 2548942    | +                      | atoA                    | acetate CoA-transferase beta subunit            |
| i02_2564         | CDS         | 2548939      | 2550261    | +                      | atoE                    | Short-chain fatty acids transporter             |
| i02_2565         | CDS         | 2550292      | 2551476    | +                      | atoB                    | Acetyl-CoA acetyltransferase                    |
| i02_2566         | CDS         | 2551550      | 2552326    | -                      | yfaP                    | hypothetical protein                            |
| i02_2567         | CDS         | 2552331      | 2553980    | -                      | yfaQ                    | hypothetical protein                            |
| i02_2568         | CDS         | 2553981      | 2558585    | -                      | /                       | hypothetical protein                            |
| i02_2569         | CDS         | 2558519      | 2559142    | -                      | yfaT                    | hypothetical protein                            |
| i02_2570         | CDS         | 2559139      | 2560827    | -                      | yfaA                    | hypothetical protein                            |
| i02_2571         | CDS         | 2560976      | 2563603    | -                      | gyrA                    | DNA gyrase subunit A                            |
| i02_2572         | CDS         | 2563702      | 2564472    | +                      | ubiG                    | 3-demethylubiquinone-9 3-methyltransferase      |
| i02_2573         | CDS         | 2564612      | 2568376    | -                      | yfaL                    | adhesin                                         |
| i02_2574         | CDS         | 2568794      | 2569006    | -                      | /                       | conserved domain protein                        |
| i02_2575         | CDS         | 2569052      | 2571337    | +                      | nrdA                    | ribonucleotide-diphosphate reductase subunit    |
| i02_2576         | CDS         | 2571527      | 2572657    | +                      | nrdB                    | ribonucleotide-diphosphate reductase subunit    |
| i02_2577         | CDS         | 2572657      | 2572911    | +                      | yfaE                    | 2Fe-2S ferredoxin YfaE                          |
| i02_2578         | CDS         | 2572965      | 2573615    | -                      | inaA                    | hypothetical protein                            |
| i02_2579         | CDS         | 2573818      | 2574894    | -                      | glpQ                    | glycerophosphodiester phosphodiesterase         |
| i02_2580         | CDS         | 2574899      | 2576257    | -                      | glpT                    | sn-glycerol-3-phosphate transporter             |
| i02_2581         | CDS         | 2576530      | 2578158    | +                      | glpA                    | sn-glycerol-3-phosphate dehydrogenase subunit A |
| i02_2582         | CDS         | 2578076      | 2579407    | +                      | glpB                    | anaerobic glycerol-3-phosphate dehydrogenase    |
| i02_2583         | CDS         | 2579404      | 2580594    | +                      | glpC                    | sn-glycerol-3-phosphate dehydrogenase subunit C |
| i02_2584         | CDS         | 2580619      | 2580744    | +                      | /                       | hypothetical protein                            |
| i02_2585         | CDS         | 2580811      | 2581713    | +                      | yfaD                    | hypothetical protein                            |
| i02_2586         | CDS         | 2581754      | 2582557    | -                      | yfaU                    | putative aldolase                               |
| i02_2587         | CDS         | 2582575      | 2583903    | -                      | yfaV                    | putative transport protein YfaV                 |
| i02_2588         | CDS         | 2583921      | 2585138    | -                      | yfaW                    | hypothetical protein                            |
| i02_2589         | CDS         | 2585141      | 2585923    | -                      | yfaX                    | putative transcriptional regulator YfaX         |
| i02_2590         | CDS         | 2586143      | 2587345    | -                      | /                       | competence damage-inducible protein A           |
| i02_2591         | CDS         | 2587445      | 2588008    | -                      | yfaZ                    | hypothetical protein                            |
| i02_2592         | CDS         | 2588266      | 2588691    | +                      | yfaO                    | putative Nudix hydrolase yfaO                   |
| i02_2593         | CDS         | 2588730      | 2589359    | -                      | ais                     | Ais protein                                     |
| i02_2594         | CDS         | 2589607      | 2590779    | +                      | yfbE                    | UDP-L-Ara4O C-4 transaminase                    |
| i02_2595         | CDS         | 2590783      | 2591751    | +                      | /                       | undecaprenyl phosphate                          |
| i02_2596         | CDS         | 2591751      | 2593733    | +                      | yfbG                    | bifunctional UDP-glucuronic acid                |
| i02_2597         | CDS         | 2593730      | 2594620    | +                      | yfbH                    | hypothetical protein                            |
| i02_2598         | CDS         | 2594620      | 2596272    | +                      | arnT                    | 4-amino-4-deoxy-L-arabinose transferase         |
| i02_2599         | CDS         | 2596269      | 2596604    | +                      | /                       | hypothetical protein                            |
| i02_2600         | CDS         | 2596604      | 2596990    | +                      | yfbJ                    | hypothetical protein                            |

| Locus_tag | Type   | start   | End     | +/- <sup>a</sup> | Gene <sup>b</sup> | Product                                         |
|-----------|--------|---------|---------|------------------|-------------------|-------------------------------------------------|
| i02_2601  | CDS    | 2596984 | 2597280 | -                | pmrD              | polymyxin B resistance protein pmrD             |
| i02_2602  | CDS    | 2597360 | 2598715 | -                | menE              | O-succinylbenzoic acid--CoA ligase              |
| i02_2603  | CDS    | 2598712 | 2599674 | -                | menC              | O-succinylbenzoate synthase                     |
| i02_2604  | CDS    | 2599674 | 2600531 | -                | menB              | naphthoate synthase                             |
| i02_2605  | CDS    | 2599863 | 2600696 | +                | /                 | hypothetical protein                            |
| i02_2606  | CDS    | 2600546 | 2601304 | -                | yfbB              | acyl-CoA thioester hydrolase YfbB               |
| i02_2607  | CDS    | 2601301 | 2603160 | -                | menD              | 2-hydroxyglutarate synthase                     |
| i02_2608  | CDS    | 2603060 | 2604355 | -                | menF              | menaquinone-specific isochorismate synthase     |
| i02_2609  | CDS    | 2604434 | 2604739 | -                | elaB              | hypothetical protein                            |
| i02_2610  | CDS    | 2604794 | 2605255 | -                | elaA              | hypothetical protein                            |
| i02_2611  | CDS    | 2605320 | 2606237 | +                | elaC              | ribonuclease Z                                  |
| i02_2612  | CDS    | 2606358 | 2608100 | -                | yfbK              | hypothetical protein                            |
| i02_2613  | CDS    | 2608242 | 2609210 | +                | yfbL              | hypothetical protein                            |
| i02_2614  | CDS    | 2609313 | 2609816 | +                | yfbM              | hypothetical protein                            |
| i02_2615  | CDS    | 2609883 | 2611340 | -                | nuoN              | NADH dehydrogenase subunit N                    |
| i02_2616  | CDS    | 2611347 | 2612876 | -                | nuoM              | NADH dehydrogenase subunit M                    |
| i02_2617  | CDS    | 2613040 | 2614881 | -                | nuoL              | NADH dehydrogenase subunit L                    |
| i02_2618  | CDS    | 2614878 | 2615180 | -                | nuoK              | NADH dehydrogenase subunit K                    |
| i02_2619  | CDS    | 2615177 | 2615731 | -                | nuoJ              | NADH dehydrogenase subunit J                    |
| i02_2620  | CDS    | 2615743 | 2616285 | -                | nuoI              | NADH dehydrogenase subunit I                    |
| i02_2621  | CDS    | 2616300 | 2617277 | -                | nuoH              | NADH dehydrogenase subunit H                    |
| i02_2622  | CDS    | 2617274 | 2620006 | -                | nuoG              | NADH dehydrogenase subunit G                    |
| i02_2623  | CDS    | 2620053 | 2621390 | -                | nuoF              | NADH dehydrogenase I subunit F                  |
| i02_2624  | CDS    | 2621387 | 2621887 | -                | nuoE              | NADH dehydrogenase subunit E                    |
| i02_2625  | CDS    | 2621890 | 2623692 | -                | nuoC              | bifunctional NADH:ubiquinone oxidoreductase     |
| i02_2626  | CDS    | 2623786 | 2624448 | -                | nuoB              | NADH dehydrogenase subunit B                    |
| i02_2627  | CDS    | 2624464 | 2624907 | -                | nuoA              | NADH dehydrogenase subunit A                    |
| i02_2628  | CDS    | 2625054 | 2625323 | -                | /                 | hypothetical protein                            |
| i02_2629  | CDS    | 2625537 | 2626475 | -                | IrhA              | transcriptional regulator IrhA                  |
| i02_2630  | CDS    | 2627395 | 2628612 | +                | /                 | aminotransferase AlaT                           |
| i02_2631  | CDS    | 2628696 | 2629295 | +                | yfbR              | hypothetical protein                            |
| i02_2632  | CDS    | 2629354 | 2631186 | -                | yfbS              | hypothetical protein                            |
| i02_2633  | CDS    | 2631273 | 2631923 | -                | yfbT              | putative phosphatase                            |
| i02_2634  | CDS    | 2631934 | 2632446 | -                | /                 | hypothetical protein                            |
| i02_2635  | CDS    | 2632510 | 2632965 | -                | yfbV              | hypothetical protein                            |
| i02_2636  | CDS    | 2633034 | 2633165 | -                | /                 | hypothetical protein                            |
| i02_2637  | CDS    | 2633303 | 2634505 | +                | ackA              | acetate kinase                                  |
| i02_2638  | CDS    | 2634580 | 2636724 | +                | pta               | phosphate acetyltransferase                     |
| i02_2639  | CDS    | 2636893 | 2638434 | +                | yfcC              | hypothetical protein                            |
| i02_2640  | CDS    | 2638467 | 2639009 | -                | yfcD              | hypothetical protein                            |
| i02_2641  | CDS    | 2639067 | 2639621 | -                | yfcE              | phosphodiesterase                               |
| i02_2642  | CDS    | 2639674 | 2640318 | -                | yfcF              | GST-like protein yfcF                           |
| i02_2643  | CDS    | 2640454 | 2641101 | +                | yfcG              | glutathione S-transferase                       |
| i02_2644  | CDS    | 2641158 | 2641520 | +                | folX              | D-erythro-7,8-dihydroneopterin triphosphate     |
| i02_2645  | CDS    | 2641541 | 2642434 | +                | yfcH              | hypothetical protein                            |
| i02_2646  | CDS    | 2642593 | 2643366 | -                | hisP              | histidine/lysine/arginine/ornithine transporter |
| i02_2647  | CDS    | 2643374 | 2644090 | -                | hisM              | histidine transport system permease protein     |
| i02_2648  | CDS    | 2644087 | 2644773 | -                | hisQ              | histidine transport system permease protein     |
| i02_2649  | CDS    | 2644863 | 2645645 | -                | hisJ              | histidine-binding periplasmic protein precursor |
| i02_2650  | pseudo | 2645866 | 2646648 | -                | hisJ              | histidine-binding periplasmic protein precursor |
| i02_2651  | CDS    | 2646793 | 2646936 | -                | /                 | hypothetical protein                            |
| i02_2652  | CDS    | 2646914 | 2647483 | -                | ubiX              | 3-octaprenyl-4-hydroxybenzoate carboxy-lyase    |
| i02_2653  | CDS    | 2647578 | 2649095 | -                | purF              | amidophosphoribosyltransferase                  |
| i02_2654  | CDS    | 2649132 | 2649620 | -                | cvpA              | colicin V production protein                    |
| i02_2655  | CDS    | 2649722 | 2649892 | +                | /                 | hypothetical protein                            |
| i02_2656  | CDS    | 2650152 | 2650814 | -                | dedD              | hypothetical protein                            |
| i02_2657  | CDS    | 2650804 | 2652072 | -                | folC              | bifunctional folylpolyglutamate synthase        |
| i02_2658  | CDS    | 2652142 | 2653056 | -                | accD              | acetyl-CoA carboxylase subunit beta             |

| Locus_tag | Type | start   | End     | +/- <sup>a</sup> | Gene <sup>b</sup> | Product                                          |
|-----------|------|---------|---------|------------------|-------------------|--------------------------------------------------|
| i02_2659  | CDS  | 2653212 | 2653871 | -                | dedA              | hypothetical protein                             |
| i02_2660  | CDS  | 2653954 | 2654766 | -                | truA              | tRNA pseudouridine synthase A                    |
| i02_2661  | CDS  | 2654766 | 2655779 | -                | usg               | putative semialdehyde dehydrogenase              |
| i02_2662  | CDS  | 2655760 | 2655873 | +                | /                 | hypothetical protein                             |
| i02_2663  | CDS  | 2655845 | 2656981 | -                | pdxB              | erythronate-4-phosphate dehydrogenase            |
| i02_2664  | CDS  | 2657080 | 2658075 | +                | flk               | flagella biosynthesis regulator                  |
| i02_2665  | CDS  | 2658072 | 2659250 | -                | yfcJ              | hypothetical protein                             |
| i02_2666  | CDS  | 2659515 | 2660735 | -                | fabB              | 3-oxoacyl-(acyl carrier protein) synthase I      |
| i02_2667  | CDS  | 2660894 | 2662900 | +                | mnmC              | 5-methylaminomethyl-2-thiouridine                |
| i02_2668  | CDS  | 2663021 | 2663299 | -                | yfcL              | hypothetical protein                             |
| i02_2669  | CDS  | 2663333 | 2663881 | -                | yfcM              | hypothetical protein                             |
| i02_2670  | CDS  | 2663881 | 2664690 | -                | yfcA              | hypothetical protein                             |
| i02_2671  | CDS  | 2664690 | 2665514 | -                | mepA              | penicillin-insensitive murein endopeptidase      |
| i02_2672  | CDS  | 2665518 | 2666606 | -                | aroC              | chorismate synthase                              |
| i02_2673  | CDS  | 2666638 | 2667903 | -                | yfcB              | N5-glutamine S-adenosyl-L-methionine-dependent   |
| i02_2674  | CDS  | 2667736 | 2668287 | +                | yfcN              | hypothetical protein                             |
| i02_2675  | CDS  | 2668607 | 2669479 | -                | yfcO              | hypothetical protein                             |
| i02_2676  | CDS  | 2669466 | 2669993 | -                | yfcP              | fimbrial-like protein yfcP precursor             |
| i02_2677  | CDS  | 2669990 | 2670469 | -                | yfcQ              | fimbrial-like protein yfcQ precursor             |
| i02_2678  | CDS  | 2670466 | 2671011 | -                | yfcR              | hypothetical protein                             |
| i02_2679  | CDS  | 2670986 | 2671738 | -                | yfcS              | fimbrial chaperone yfcS precursor                |
| i02_2680  | CDS  | 2671758 | 2674412 | -                | yfcU              | hypothetical protein                             |
| i02_2681  | CDS  | 2674487 | 2675053 | -                | yfcV              | fimbrial-like protein yfcV precursor             |
| i02_2682  | CDS  | 2675620 | 2676105 | -                | /                 | phosphohistidine phosphatase                     |
| i02_2683  | CDS  | 2676308 | 2678452 | -                | fadJ              | multifunctional fatty acid oxidation complex     |
| i02_2684  | CDS  | 2678452 | 2679762 | -                | fadI              | 3-ketoacyl-CoA thiolase                          |
| i02_2685  | CDS  | 2679942 | 2680250 | -                | yfcZ              | hypothetical protein                             |
| i02_2686  | CDS  | 2680311 | 2680562 | -                | /                 | hypothetical protein                             |
| i02_2687  | CDS  | 2680592 | 2681938 | +                | fadL              | long-chain fatty acid outer membrane             |
| i02_2688  | CDS  | 2682000 | 2682755 | -                | vacJ              | VacJ lipoprotein precursor                       |
| i02_2689  | CDS  | 2682781 | 2682951 | -                | /                 | hypothetical protein                             |
| i02_2690  | CDS  | 2683049 | 2683981 | +                | yfdC              | hypothetical protein                             |
| i02_2691  | CDS  | 2684569 | 2685099 | -                | /                 | hypothetical protein                             |
| i02_2693  | CDS  | 2685147 | 2693078 | -                | /                 | outer membrane autotransporter                   |
| i02_2694  | CDS  | 2693103 | 2693723 | -                | /                 | hypothetical protein                             |
| i02_2695  | CDS  | 2694041 | 2694670 | -                | /                 | Type 1 fimbriae regulatory protein fimB          |
| i02_2696  | CDS  | 2695418 | 2695987 | +                | /                 | Type 1 fimbriae regulatory protein fimB          |
| i02_2697  | CDS  | 2696382 | 2697335 | -                | dsdC              | DNA-binding transcriptional regulator DsdC       |
| i02_2698  | CDS  | 2697547 | 2698884 | +                | dsdX              | permease DsdX                                    |
| i02_2699  | CDS  | 2698902 | 2700230 | +                | dsdA              | D-serine dehydratase                             |
| i02_2700  | CDS  | 2700338 | 2701876 | -                | emrY              | multidrug resistance protein Y                   |
| i02_2701  | CDS  | 2701563 | 2701901 | +                | /                 | hypothetical protein                             |
| i02_2702  | CDS  | 2701876 | 2703039 | -                | emrK              | multidrug resistance protein K                   |
| i02_2703  | CDS  | 2703455 | 2704069 | +                | evgA              | DNA-binding transcriptional activator EvgA       |
| i02_2704  | CDS  | 2704074 | 2707667 | +                | evgS              | hybrid sensory histidine kinase in two-component |
| i02_2705  | CDS  | 2707723 | 2708907 | -                | yfdE              | hypothetical protein                             |
| i02_2706  | CDS  | 2708942 | 2709886 | -                | yfdV              | putative transporter YfdV                        |
| i02_2707  | CDS  | 2709956 | 2711650 | -                | /                 | putative oxalyl-CoA decarboxylase                |
| i02_2708  | CDS  | 2711704 | 2712954 | -                | yfdW              | formyl-coenzyme A transferase                    |
| i02_2709  | CDS  | 2713466 | 2714098 | -                | /                 | hypothetical protein                             |
| i02_2710  | CDS  | 2714393 | 2714668 | +                | ypdI              | lipoprotein ypdI precursor                       |
| i02_2711  | CDS  | 2714745 | 2714987 | -                | yfdY              | hypothetical protein                             |
| i02_2712  | CDS  | 2715340 | 2716260 | +                | ddg               | lipid A biosynthesis protein                     |
| i02_2713  | CDS  | 2716752 | 2717990 | -                | yfdZ              | aminotransferase                                 |
| i02_2715  | CDS  | 2718178 | 2718315 | -                | /                 | hypothetical protein                             |
| i02_2716  | CDS  | 2718367 | 2720064 | +                | ypdA              | hypothetical protein                             |
| i02_2717  | CDS  | 2720061 | 2720816 | +                | ypdB              | hypothetical protein                             |
| i02_2718  | CDS  | 2720829 | 2721686 | +                | ypdC              | putative transcriptional regulator YpdC          |

| Locus_tag | Type | start   | End     | +/- <sup>a</sup> | Gene <sup>b</sup> | Product                                         |
|-----------|------|---------|---------|------------------|-------------------|-------------------------------------------------|
| i02_2719  | CDS  | 2721689 | 2724184 | -                | /                 | putative phosphoenolpyruvate-protein            |
| i02_2720  | CDS  | 2724209 | 2725246 | -                | ypdE              | exoaminopeptidase                               |
| i02_2721  | CDS  | 2725246 | 2726331 | -                | /                 | aminopeptidase                                  |
| i02_2722  | CDS  | 2726347 | 2727594 | -                | /                 | putative PTS system IIC component ypdG          |
| i02_2723  | CDS  | 2727616 | 2727993 | -                | /                 | putative PTS system IIB component ypdH          |
| i02_2724  | CDS  | 2728161 | 2729126 | -                | glk               | glucokinase                                     |
| i02_2725  | CDS  | 2729330 | 2730586 | +                | yfeO              | hypothetical protein                            |
| i02_2726  | CDS  | 2730701 | 2731027 | +                | ypeC              | hypothetical protein                            |
| i02_2727  | CDS  | 2731168 | 2732406 | -                | /                 | manganese transport protein MntH                |
| i02_2728  | CDS  | 2732703 | 2733944 | +                | nupC              | nucleoside permease nupC                        |
| i02_2729  | CDS  | 2733993 | 2736242 | -                | yfeA              | hypothetical protein                            |
| i02_2730  | CDS  | 2736685 | 2737044 | +                | yfeC              | hypothetical protein                            |
| i02_2731  | CDS  | 2737046 | 2737438 | +                | yfeD              | hypothetical protein                            |
| i02_2732  | CDS  | 2737489 | 2738904 | -                | gltX              | glutamyl-tRNA synthetase                        |
| i02_2733  | CDS  | 2738908 | 2739039 | +                | /                 | hypothetical protein                            |
| i02_2734  | CDS  | 2739548 | 2740447 | -                | xapR              | DNA-binding transcriptional activator XapR      |
| i02_2735  | CDS  | 2740473 | 2740631 | -                | /                 | hypothetical protein                            |
| i02_2736  | CDS  | 2740684 | 2741940 | -                | xapB              | xanthosine permease                             |
| i02_2737  | CDS  | 2742001 | 2742834 | -                | xapA              | purine nucleoside phosphorylase                 |
| i02_2738  | CDS  | 2742928 | 2743047 | -                | /                 | hypothetical protein                            |
| i02_2739  | CDS  | 2743082 | 2743846 | +                | yfeN              | hypothetical protein                            |
| i02_2740  | CDS  | 2743885 | 2744811 | -                | yfeR              | putative transcriptional regulator YfeR         |
| i02_2741  | CDS  | 2744901 | 2745899 | +                | yfeH              | hypothetical protein                            |
| i02_2742  | CDS  | 2745896 | 2746114 | -                | /                 | hypothetical protein                            |
| i02_2743  | CDS  | 2746116 | 2748131 | -                | ligA              | NAD-dependent DNA ligase LigA                   |
| i02_2744  | CDS  | 2748202 | 2749251 | -                | zipA              | cell division protein ZipA                      |
| i02_2745  | CDS  | 2749430 | 2750191 | +                | cysZ              | putative sulfate transport protein CysZ         |
| i02_2746  | CDS  | 2750376 | 2751347 | +                | cysK              | cysteine synthase A                             |
| i02_2747  | CDS  | 2751466 | 2751594 | -                | /                 | hypothetical protein                            |
| i02_2748  | CDS  | 2751731 | 2751988 | +                | ptsH              | phosphohistidinoprotein-hexose                  |
| i02_2749  | CDS  | 2752033 | 2753760 | +                | ptsI              | phosphoenolpyruvate-protein phosphotransferase  |
| i02_2750  | CDS  | 2753801 | 2754310 | +                | crr               | glucose-specific PTS system component           |
| i02_2751  | CDS  | 2754353 | 2755204 | -                | pdxK              | pyridoxal kinase                                |
| i02_2752  | CDS  | 2755309 | 2755677 | +                | yfeK              | hypothetical protein                            |
| i02_2753  | CDS  | 2755680 | 2756591 | -                | cysM              | cysteine synthase B                             |
| i02_2754  | CDS  | 2756726 | 2757823 | -                | cysA              | sulfate/thiosulfate transporter subunit         |
| i02_2755  | CDS  | 2757813 | 2758688 | -                | cysW              | sulfate/thiosulfate transporter permease        |
| i02_2756  | CDS  | 2758688 | 2759521 | -                | cysU              | sulfate/thiosulfate transporter subunit         |
| i02_2757  | CDS  | 2759521 | 2760537 | -                | cysP              | thiosulfate transporter subunit                 |
| i02_2758  | CDS  | 2760695 | 2761486 | -                | ucpA              | short chain dehydrogenase                       |
| i02_2759  | CDS  | 2761766 | 2762662 | +                | murQ              | N-acetylmuramic acid-6-phosphate etherase       |
| i02_2760  | CDS  | 2762666 | 2764090 | +                | murP              | N-acetylmuramic acid phosphotransfer permease   |
| i02_2761  | CDS  | 2764110 | 2764253 | -                | /                 | hypothetical protein                            |
| i02_2762  | CDS  | 2764253 | 2765179 | +                | /                 | hypothetical protein                            |
| i02_2763  | CDS  | 2765263 | 2765838 | -                | yfeY              | hypothetical protein                            |
| i02_2764  | CDS  | 2765899 | 2766354 | -                | yfeZ              | hypothetical protein                            |
| i02_2765  | CDS  | 2766335 | 2766760 | -                | yfeA              | putative acetyltransferase                      |
| i02_2766  | CDS  | 2766974 | 2767843 | +                | amiA              | N-acetylmuramoyl-l-alanine amidase I            |
| i02_2767  | CDS  | 2767844 | 2768746 | +                | hemF              | coproporphyrinogen III oxidase                  |
| i02_2768  | CDS  | 2768752 | 2769804 | -                | yfeG              | transcriptional regulator EutR                  |
| i02_2769  | CDS  | 2769850 | 2770356 | -                | /                 | ethanolamine utilization protein eutK precursor |
| i02_2770  | CDS  | 2770363 | 2771022 | -                | /                 | ethanolamine utilization protein eutL           |
| i02_2771  | CDS  | 2771032 | 2771919 | -                | eutC              | ethanolamine ammonia-lyase small subunit        |
| i02_2772  | CDS  | 2771940 | 2773301 | -                | eutB              | ethanolamine ammonia-lyase heavy chain          |
| i02_2773  | CDS  | 2773313 | 2774716 | -                | eutA              | reactivating factor for ethanolamine ammonia    |
| i02_2774  | CDS  | 2774713 | 2775939 | -                | eutH              | ethanolamine utilization protein eutH           |
| i02_2775  | CDS  | 2776156 | 2777370 | -                | eutG              | ethanolamine utilization protein eutG           |
| i02_2776  | CDS  | 2777333 | 2778169 | -                | eutJ              | ethanolamine utilization protein eutJ           |



| Locus_tag | Type | start   | End     | +/- <sup>a</sup> | Gene <sup>b</sup> | Product                                         |
|-----------|------|---------|---------|------------------|-------------------|-------------------------------------------------|
| i02_2777  | CDS  | 2778180 | 2779583 | -                | eutE              | ethanolamine utilization protein eutE           |
| i02_2778  | CDS  | 2779595 | 2779882 | -                | cchB              | ethanolamine utilization protein eutN           |
| i02_2779  | CDS  | 2779989 | 2780324 | -                | cchA              | ethanolamine utilization protein eutM precursor |
| i02_2780  | CDS  | 2780321 | 2781337 | -                | eutD              | phosphotransacetylase                           |
| i02_2781  | CDS  | 2781334 | 2782137 | -                | /                 | ethanolamine utilization cobalamin              |
| i02_2782  | CDS  | 2782134 | 2782835 | -                | /                 | ethanolamine utilization protein EutQ           |
| i02_2783  | CDS  | 2782810 | 2783289 | -                | /                 | ethanolamine utilization protein eutP           |
| i02_2784  | CDS  | 2783302 | 2783709 | -                | /                 | ethanolamine utilization protein eutS           |
| i02_2785  | CDS  | 2783930 | 2786209 | -                | /                 | malic enzyme                                    |
| i02_2786  | CDS  | 2786498 | 2787448 | +                | talA              | transaldolase A                                 |
| i02_2787  | CDS  | 2787468 | 2789471 | +                | tktB              | transketolase                                   |
| i02_2788  | CDS  | 2789574 | 2790617 | -                | ypfG              | hypothetical protein                            |
| i02_2789  | CDS  | 2790743 | 2791345 | -                | yffH              | hypothetical protein                            |
| i02_2790  | CDS  | 2791386 | 2793365 | -                | yffG              | putative oxidoreductase Fe-S binding subunit    |
| i02_2791  | CDS  | 2793556 | 2795271 | +                | narQ              | nitrate/nitrite sensor protein NarQ             |
| i02_2792  | CDS  | 2795435 | 2798548 | +                | acrD              | aminoglycoside/multidrug efflux system          |
| i02_2793  | CDS  | 2798726 | 2798848 | +                | /                 | conserved hypothetical protein                  |
| i02_2794  | CDS  | 2799087 | 2799443 | +                | yffB              | hypothetical protein                            |
| i02_2795  | CDS  | 2799447 | 2800574 | +                | dapE              | succinyl-diaminopimelate desuccinylase          |
| i02_2796  | CDS  | 2800602 | 2800802 | +                | /                 | hypothetical protein                            |
| i02_2797  | CDS  | 2800883 | 2801605 | -                | ypfH              | esterase YpfH                                   |
| i02_2798  | CDS  | 2801655 | 2803670 | -                | ypfI              | hypothetical protein                            |
| i02_2799  | CDS  | 2803685 | 2804548 | -                | ypfJ              | hypothetical protein                            |
| i02_2800  | CDS  | 2804716 | 2805438 | -                | purC              | phosphoribosylaminoimidazole-succinocarboxamide |
| i02_2801  | CDS  | 2805642 | 2806679 | -                | nlpB              | lipoprotein                                     |
| i02_2802  | CDS  | 2806693 | 2807589 | -                | dapA              | dihydrodipicolinate synthase                    |
| i02_2803  | CDS  | 2807717 | 2808289 | +                | gcvR              | predicted transcriptional regulator             |
| i02_2804  | CDS  | 2808289 | 2808759 | +                | bcp               | thioredoxin-dependent thiol peroxidase          |
| i02_2805  | CDS  | 2808858 | 2809919 | -                | perM              | putative permease PerM                          |
| i02_2806  | CDS  | 2809950 | 2810126 | +                | /                 | hypothetical protein                            |
| i02_2807  | CDS  | 2810132 | 2811595 | +                | yfgC              | hypothetical protein                            |
| i02_2808  | CDS  | 2811616 | 2811975 | +                | /                 | hypothetical protein                            |
| i02_2809  | CDS  | 2812113 | 2812859 | -                | yfgE              | DNA replication initiation factor               |
| i02_2810  | CDS  | 2812909 | 2814240 | -                | uraA              | uracil transporter                              |
| i02_2811  | CDS  | 2814284 | 2814910 | -                | upp               | uracil phosphoribosyltransferase                |
| i02_2812  | CDS  | 2814872 | 2815216 | +                | /                 | hypothetical protein                            |
| i02_2813  | CDS  | 2815220 | 2816272 | +                | purM              | phosphoribosylaminoimidazole synthetase         |
| i02_2814  | CDS  | 2816272 | 2816910 | +                | purN              | phosphoribosylglycinamide formyltransferase     |
| i02_2815  | CDS  | 2817076 | 2819148 | +                | ppk               | polyphosphate kinase                            |
| i02_2816  | CDS  | 2819153 | 2820694 | +                | ppx               | exopolyphosphatase                              |
| i02_2817  | CDS  | 2820733 | 2822976 | -                | yfgF              | hypothetical protein                            |
| i02_2819  | CDS  | 2823193 | 2823483 | -                | /                 | hypothetical protein                            |
| i02_2820  | CDS  | 2823830 | 2824348 | +                | yfgH              | lipoprotein yfgH precursor                      |
| i02_2821  | CDS  | 2824364 | 2824903 | +                | yfgI              | hypothetical protein                            |
| i02_2822  | CDS  | 2824997 | 2826574 | -                | guaA              | GMP synthase                                    |
| i02_2823  | CDS  | 2826643 | 2828178 | -                | guaB              | inosine 5'-monophosphate dehydrogenase          |
| i02_2824  | CDS  | 2828271 | 2829647 | +                | xseA              | exodeoxyribonuclease VII large subunit          |
| i02_2825  | CDS  | 2829716 | 2837767 | -                | /                 | RatA-like protein                               |
| i02_2826  | CDS  | 2837888 | 2838865 | -                | /                 | SinI-like protein                               |
| i02_2827  | CDS  | 2838920 | 2841127 | -                | /                 | SinH-like protein                               |
| i02_2828  | CDS  | 2841306 | 2841521 | -                | yfgJ              | hypothetical protein                            |
| i02_2829  | CDS  | 2841584 | 2843095 | -                | engA              | GTP-binding protein EngA                        |
| i02_2830  | CDS  | 2843174 | 2844316 | -                | yfgL              | outer membrane protein assembly complex subunit |
| i02_2831  | CDS  | 2844363 | 2844983 | -                | yfgM              | hypothetical protein                            |
| i02_2832  | CDS  | 2845001 | 2846275 | -                | hisS              | histidyl-tRNA synthetase                        |
| i02_2833  | CDS  | 2846386 | 2847504 | -                | ispG              | 4-hydroxy-3-methylbut-2-en-1-yl diphosphate     |

| Locus_tag | Type   | start   | End     | +/- <sup>a</sup> | Gene <sup>b</sup> | Product                                        |
|-----------|--------|---------|---------|------------------|-------------------|------------------------------------------------|
| i02_2834  | CDS    | 2847531 | 2848538 | -                | yfgA              | hypothetical protein                           |
| i02_2835  | CDS    | 2848823 | 2849977 | -                | yfgB              | hypothetical protein                           |
| i02_2836  | CDS    | 2850127 | 2850558 | -                | ndk               | nucleoside diphosphate kinase                  |
| i02_2837  | CDS    | 2850707 | 2853028 | -                | pbpC              | penicillin-binding protein 1C                  |
| i02_2838  | CDS    | 2853029 | 2857990 | -                | yfhM              | lipoprotein yfhM precursor                     |
| i02_2839  | CDS    | 2858044 | 2859042 | +                | sseA              | 3-mercaptopyruvate sulfurtransferase           |
| i02_2840  | CDS    | 2859026 | 2859178 | +                | /                 | hypothetical protein                           |
| i02_2841  | CDS    | 2859370 | 2859507 | +                | /                 | hypothetical protein                           |
| i02_2842  | CDS    | 2859539 | 2860324 | -                | sseB              | enhanced serine sensitivity protein SseB       |
| i02_2843  | CDS    | 2860458 | 2861741 | -                | pepB              | aminopeptidase B                               |
| i02_2844  | CDS    | 2861800 | 2862000 | -                | yfhJ              | hypothetical protein                           |
| i02_2845  | CDS    | 2862012 | 2862347 | -                | fdx               | ferredoxin, 2Fe-2S                             |
| i02_2846  | CDS    | 2862349 | 2864253 | -                | hscA              | chaperone protein HscA                         |
| i02_2847  | CDS    | 2864216 | 2864731 | -                | hscB              | co-chaperone HscB                              |
| i02_2848  | CDS    | 2864739 | 2864855 | -                | /                 | hypothetical protein                           |
| i02_2849  | CDS    | 2864827 | 2865150 | -                | iscA              | iron-sulfur cluster assembly protein           |
| i02_2850  | CDS    | 2865167 | 2865553 | -                | /                 | scaffold protein                               |
| i02_2851  | CDS    | 2865581 | 2866819 | -                | yfhO              | cysteine desulfurase                           |
| i02_2852  | CDS    | 2866907 | 2867395 | -                | yfhP              | DNA-binding transcriptional regulator IscR     |
| i02_2853  | CDS    | 2867666 | 2868406 | -                | yfhQ              | putative tRNA/rRNA methyltransferase YfhQ      |
| i02_2854  | CDS    | 2868525 | 2869328 | +                | suhB              | inositol monophosphatase                       |
| i02_2855  | CDS    | 2869446 | 2870327 | +                | yfhR              | hypothetical protein                           |
| i02_2856  | CDS    | 2870497 | 2871798 | +                | csiE              | stationary phase inducible protein CsiE        |
| i02_2857  | CDS    | 2871790 | 2872929 | -                | hcaT              | putative 3-phenylpropionic acid transporter    |
| i02_2858  | CDS    | 2872963 | 2873106 | -                | /                 | hypothetical protein                           |
| i02_2859  | CDS    | 2873149 | 2873301 | +                | /                 | hypothetical protein                           |
| i02_2860  | CDS    | 2873253 | 2873720 | +                | yphA              | hypothetical protein                           |
| i02_2861  | CDS    | 2873880 | 2874752 | -                | yphB              | hypothetical protein                           |
| i02_2862  | CDS    | 2874764 | 2875858 | -                | yphC              | hypothetical protein                           |
| i02_2863  | CDS    | 2875891 | 2876889 | -                | yphD              | ABC transporter permease                       |
| i02_2864  | CDS    | 2876914 | 2878425 | -                | yphE              | ABC transporter ATP-binding protein            |
| i02_2865  | CDS    | 2878448 | 2879431 | -                | yphF              | ABC transporter periplasmic-binding protein    |
| i02_2866  | CDS    | 2879528 | 2882902 | -                | yphG              | hypothetical protein                           |
| i02_2867  | CDS    | 2882921 | 2884120 | +                | yphH              | hypothetical protein                           |
| i02_2868  | CDS    | 2884184 | 2885443 | -                | glyA              | serine hydroxymethyltransferase                |
| i02_2869  | CDS    | 2885589 | 2885717 | +                | /                 | hypothetical protein                           |
| i02_2870  | CDS    | 2885766 | 2886956 | +                | hmpA              | nitric oxide dioxygenase                       |
| i02_2871  | CDS    | 2887001 | 2887339 | -                | glnB              | nitrogen regulatory protein P-II 1             |
| i02_2872  | CDS    | 2887400 | 2888773 | -                | yfhA              | hypothetical protein                           |
| i02_2873  | CDS    | 2888724 | 2889443 | -                | yfhG              | hypothetical protein                           |
| i02_2874  | CDS    | 2889602 | 2891092 | -                | yfhK              | putative sensor-like histidine kinase yfhK     |
| i02_2875  | CDS    | 2891605 | 2895492 | -                | purL              | phosphoribosylformylglycinamide synthase       |
| i02_2876  | pseudo | 2895750 | 2897306 | +                | yfhD              | putative transglycosylase                      |
| i02_2877  | CDS    | 2897303 | 2897839 | -                | yfhC              | tRNA-specific adenosine deaminase              |
| i02_2878  | CDS    | 2897864 | 2898499 | -                | yfhB              | hypothetical protein                           |
| i02_2879  | CDS    | 2898460 | 2898597 | -                | /                 | hypothetical protein                           |
| i02_2880  | CDS    | 2898636 | 2899556 | +                | yfhH              | putative DNA-binding transcriptional regulator |
| i02_2881  | CDS    | 2899612 | 2899872 | +                | yfhL              | putative ferredoxin-like protein yfhL          |
| i02_2882  | CDS    | 2900567 | 2900947 | -                | acpS              | 4'-phosphopantetheinyl transferase             |
| i02_2883  | CDS    | 2900947 | 2901693 | -                | pdxJ              | pyridoxine 5'-phosphate synthase               |
| i02_2884  | CDS    | 2901690 | 2902418 | -                | recO              | DNA repair protein RecO                        |
| i02_2885  | CDS    | 2902430 | 2903335 | -                | era               | GTP-binding protein Era                        |
| i02_2886  | CDS    | 2903332 | 2904012 | -                | rnc               | ribonuclease III                               |
| i02_2887  | CDS    | 2904284 | 2905258 | -                | lepB              | signal peptidase I                             |
| i02_2888  | CDS    | 2905274 | 2907073 | -                | lepA              | GTP-binding protein LepA                       |
| i02_2889  | CDS    | 2907271 | 2907750 | -                | rseC              | SoxR reducing system protein RseC              |
| i02_2890  | CDS    | 2907747 | 2908703 | -                | rseB              | periplasmic negative regulator of sigmaE       |
| i02_2891  | CDS    | 2908703 | 2909353 | -                | rseA              | anti-RNA polymerase sigma factor SigE          |

| Locus_tag | Type | start   | End     | +/- <sup>a</sup> | Gene <sup>b</sup> | Product                                         |
|-----------|------|---------|---------|------------------|-------------------|-------------------------------------------------|
| i02_2892  | CDS  | 2909386 | 2909994 | -                | rpoE              | RNA polymerase sigma factor RpoE                |
| i02_2893  | CDS  | 2910369 | 2911991 | +                | nadB              | L-aspartate oxidase                             |
| i02_2894  | CDS  | 2911976 | 2912833 | -                | yfiC              | hypothetical protein                            |
| i02_2895  | CDS  | 2912845 | 2914179 | +                | srmB              | ATP-dependent RNA helicase SrmB                 |
| i02_2896  | CDS  | 2914212 | 2915138 | -                | yfiE              | putative transcriptional regulator YfiE         |
| i02_2897  | CDS  | 2915196 | 2915783 | +                | yfiK              | neutral amino-acid efflux protein               |
| i02_2898  | CDS  | 2915839 | 2916222 | -                | yfiD              | autonomous glycyl radical cofactor GrcA         |
| i02_2899  | CDS  | 2915956 | 2916333 | +                | /                 | hypothetical protein                            |
| i02_2900  | CDS  | 2916527 | 2917216 | +                | ung               | uracil-DNA glycosylase                          |
| i02_2901  | CDS  | 2917264 | 2918301 | -                | yfiF              | putative methyltransferase                      |
| i02_2902  | CDS  | 2917837 | 2918439 | +                | yfiF              | rRNA methyltransferase YfiF                     |
| i02_2903  | CDS  | 2918508 | 2918927 | +                | trxC              | thioredoxin 2                                   |
| i02_2904  | CDS  | 2918945 | 2919694 | +                | yfiP              | hypothetical protein                            |
| i02_2905  | CDS  | 2919726 | 2922386 | +                | yfiQ              | hypothetical protein                            |
| i02_2906  | CDS  | 2922497 | 2923855 | +                | pssA              | phosphatidylserine synthase                     |
| i02_2907  | CDS  | 2923880 | 2924224 | +                | yfiM              | hypothetical protein                            |
| i02_2908  | CDS  | 2924221 | 2925612 | -                | kgpP              | alpha-ketoglutarate transporter                 |
| i02_2910  | CDS  | 2931121 | 2931255 | +                | /                 | hypothetical protein                            |
| i02_2911  | CDS  | 2931295 | 2933880 | -                | clpB              | protein disaggregation chaperone                |
| i02_2912  | CDS  | 2933998 | 2934729 | -                | yfiH              | hypothetical protein                            |
| i02_2913  | CDS  | 2934726 | 2935706 | -                | rluD              | 23S rRNA pseudouridine synthase D               |
| i02_2914  | CDS  | 2935841 | 2936578 | +                | yfiO              | outer membrane protein assembly complex subunit |
| i02_2915  | CDS  | 2936848 | 2937189 | +                | yfiA              | translation inhibitor protein RaiA              |
| i02_2916  | CDS  | 2937439 | 2938599 | +                | pheA              | bifunctional chorismate mutase/prephenate       |
| i02_2917  | CDS  | 2938642 | 2939763 | -                | tyrA              | bifunctional chorismate mutase/prephenate       |
| i02_2918  | CDS  | 2939774 | 2940844 | -                | aroF              | phospho-2-dehydro-3-deoxyheptonate aldolase     |
| i02_2919  | CDS  | 2941066 | 2941419 | +                | yfiL              | hypothetical protein                            |
| i02_2920  | CDS  | 2941566 | 2942084 | +                | yfiR              | hypothetical protein                            |
| i02_2921  | CDS  | 2942074 | 2943300 | +                | yfiN              | hypothetical protein                            |
| i02_2922  | CDS  | 2943316 | 2943798 | +                | yfiB              | putative outer membrane lipoprotein             |
| i02_2923  | CDS  | 2943875 | 2944222 | -                | rplS              | 50S ribosomal protein L19                       |
| i02_2924  | CDS  | 2944264 | 2945031 | -                | trmD              | tRNA (guanine-N(1))-methyltransferase           |
| i02_2925  | CDS  | 2945062 | 2945613 | -                | rimM              | 16S rRNA-processing protein RimM                |
| i02_2926  | CDS  | 2945629 | 2945937 | -                | rpsP              | 30S ribosomal protein S16                       |
| i02_2927  | CDS  | 2946014 | 2947375 | -                | ffh               | signal recognition particle protein             |
| i02_2928  | CDS  | 2947467 | 2948333 | +                | ypjD              | hypothetical protein                            |
| i02_2929  | CDS  | 2948414 | 2949640 | +                | /                 | hypothetical protein                            |
| i02_2930  | CDS  | 2949695 | 2950288 | -                | grpE              | heat shock protein GrpE                         |
| i02_2931  | CDS  | 2950285 | 2950536 | -                | /                 | hypothetical protein                            |
| i02_2932  | CDS  | 2950411 | 2951289 | +                | ppnK              | inorganic polyphosphate/ATP-NAD kinase          |
| i02_2933  | CDS  | 2951375 | 2953036 | +                | recN              | recombination and repair protein                |
| i02_2934  | CDS  | 2953185 | 2953526 | +                | /                 | hypothetical protein                            |
| i02_2935  | CDS  | 2953588 | 2953878 | -                | /                 | hypothetical protein                            |
| i02_2936  | CDS  | 2953868 | 2954344 | -                | yfiG              | hypothetical protein                            |
| i02_2937  | CDS  | 2954476 | 2954958 | +                | smpB              | SsrA-binding protein                            |
| i02_2938  | CDS  | 2956218 | 2957195 | +                | ygaT              | hypothetical protein                            |
| i02_2939  | CDS  | 2957149 | 2958483 | +                | ygaF              | hydroxyglutarate oxidase                        |
| i02_2940  | CDS  | 2958506 | 2959954 | +                | gabD              | succinate-semialdehyde dehydrogenase I          |
| i02_2941  | CDS  | 2959962 | 2961248 | +                | gabT              | 4-aminobutyrate aminotransferase                |
| i02_2942  | CDS  | 2961422 | 2962885 | +                | gabP              | gamma-aminobutyrate transporter                 |
| i02_2943  | CDS  | 2962888 | 2963568 | +                | ygaE              | DNA-binding transcriptional regulator CsiR      |
| i02_2944  | CDS  | 2963569 | 2964018 | -                | ygaU              | LysM domain/BON superfamily protein             |
| i02_2945  | CDS  | 2964090 | 2964275 | +                | /                 | hypothetical protein                            |
| i02_2946  | CDS  | 2964443 | 2964742 | +                | ygaV              | putative transcriptional regulator YgaV         |
| i02_2947  | CDS  | 2964752 | 2965276 | +                | ygaP              | hypothetical protein                            |
| i02_2948  | CDS  | 2965323 | 2965727 | -                | stpA              | DNA binding protein, nucleoid-associated        |
| i02_2949  | CDS  | 2965889 | 2966020 | -                | /                 | hypothetical protein                            |

| Locus_tag | Type | start   | End     | +/- <sup>a</sup> | Gene <sup>b</sup> | Product                                          |
|-----------|------|---------|---------|------------------|-------------------|--------------------------------------------------|
| i02_2950  | CDS  | 2966140 | 2966268 | +                | /                 | hypothetical protein                             |
| i02_2951  | CDS  | 2966394 | 2966843 | +                | ygaW              | hypothetical protein                             |
| i02_2952  | CDS  | 2966880 | 2967224 | -                | ygaC              | hypothetical protein                             |
| i02_2953  | CDS  | 2967364 | 2967705 | +                | ygaM              | hypothetical protein                             |
| i02_2954  | CDS  | 2967762 | 2969096 | -                | /                 | hypothetical protein                             |
| i02_2955  | CDS  | 2969184 | 2969615 | +                | /                 | hypothetical protein                             |
| i02_2956  | CDS  | 2969823 | 2970068 | +                | nrdH              | glutaredoxin-like protein                        |
| i02_2957  | CDS  | 2970065 | 2970475 | +                | nrdI              | ribonucleotide reductase stimulatory protein     |
| i02_2958  | CDS  | 2970448 | 2972592 | +                | nrdE              | ribonucleotide-diphosphate reductase subunit     |
| i02_2959  | CDS  | 2972602 | 2973561 | +                | nrdF              | ribonucleotide-diphosphate reductase subunit     |
| i02_2960  | CDS  | 2973918 | 2975120 | +                | proV              | glycine betaine transporter ATP-binding subunit  |
| i02_2961  | CDS  | 2975113 | 2976177 | +                | proW              | glycine betaine transporter membrane protein     |
| i02_2962  | CDS  | 2976234 | 2977226 | +                | proX              | glycine betaine transporter periplasmic subunit  |
| i02_2963  | CDS  | 2977279 | 2977425 | +                | /                 | hypothetical protein                             |
| i02_2964  | CDS  | 2977418 | 2978602 | +                | /                 | putative transport protein                       |
| i02_2965  | CDS  | 2978726 | 2979463 | +                | ygaZ              | hypothetical protein                             |
| i02_2966  | CDS  | 2979453 | 2979788 | +                | ygaH              | hypothetical protein                             |
| i02_2967  | CDS  | 2979879 | 2980409 | +                | emrR              | transcriptional repressor MprA                   |
| i02_2968  | CDS  | 2980524 | 2981708 | +                | emrA              | multidrug resistance protein A                   |
| i02_2969  | CDS  | 2981716 | 2983263 | +                | emrB              | multidrug resistance protein B                   |
| i02_2970  | CDS  | 2983521 | 2983877 | +                | /                 | hypothetical protein                             |
| i02_2972  | CDS  | 2983889 | 2984218 | +                | /                 | hypothetical protein                             |
| i02_2973  | CDS  | 2984215 | 2985327 | +                | /                 | hypothetical protein                             |
| i02_2974  | CDS  | 2985376 | 2985891 | -                | ygaG              | S-ribosylhomocysteinase                          |
| i02_2975  | CDS  | 2986041 | 2987597 | -                | gshA              | glutamate--cysteine ligase                       |
| i02_2976  | CDS  | 2987670 | 2988098 | -                | yqaA              | hypothetical protein                             |
| i02_2977  | CDS  | 2988095 | 2988661 | -                | yqaB              | fructose-1-phosphatase                           |
| i02_2978  | CDS  | 2988691 | 2988816 | -                | /                 | hypothetical protein                             |
| i02_2979  | CDS  | 2989989 | 2990174 | -                | csrA              | carbon storage regulator                         |
| i02_2980  | CDS  | 2990284 | 2990400 | +                | /                 | hypothetical protein                             |
| i02_2981  | CDS  | 2990409 | 2993039 | -                | alaS              | alanyl-tRNA synthetase                           |
| i02_2982  | CDS  | 2992944 | 2993114 | +                | /                 | hypothetical protein                             |
| i02_2983  | CDS  | 2993168 | 2993668 | -                | recX              | recombination regulator RecX                     |
| i02_2984  | CDS  | 2993737 | 2994813 | -                | recA              | recombinase A                                    |
| i02_2985  | CDS  | 2994878 | 2995378 | -                | ygaD              | competence damage-inducible protein A            |
| i02_2986  | CDS  | 2995520 | 2996710 | -                | mltB              | murein hydrolase B                               |
| i02_2987  | CDS  | 2996862 | 2997425 | +                | srlA              | PTS system, glucitol/sorbitol-specific IIC2      |
| i02_2988  | CDS  | 2997422 | 2998381 | +                | srlE              | PTS system, glucitol/sorbitol-specific IIBC      |
| i02_2989  | CDS  | 2998392 | 2998763 | +                | srlB              | glucitol/sorbitol-specific PTS system component  |
| i02_2990  | CDS  | 2998767 | 2999546 | +                | srlD              | sorbitol-6-phosphate dehydrogenase               |
| i02_2991  | CDS  | 2999652 | 3000011 | +                | gutM              | DNA-binding transcriptional activator GutM       |
| i02_2992  | CDS  | 3000078 | 3000851 | +                | srlR              | DNA-binding transcriptional repressor SrlR       |
| i02_2993  | CDS  | 3000844 | 3001809 | +                | gutQ              | D-arabinose 5-phosphate isomerase                |
| i02_2994  | CDS  | 3001806 | 3003320 | -                | ygaA              | anaerobic nitric oxide reductase transcription   |
| i02_2995  | CDS  | 3003507 | 3004946 | +                | norV              | anaerobic nitric oxide reductase flavorubredoxin |
| i02_2997  | CDS  | 3004943 | 3006076 | +                | ygbD              | nitric oxide reductase                           |
| i02_2998  | CDS  | 3006300 | 3008624 | -                | hypF              | hydrogenase maturation protein hypF              |
| i02_2999  | CDS  | 3008705 | 3009247 | -                | hydN              | electron transport protein HydN                  |
| i02_3000  | CDS  | 3009326 | 3009511 | -                | /                 | hypothetical protein                             |
| i02_3001  | CDS  | 3009617 | 3010045 | +                | /                 | hypothetical protein                             |
| i02_3002  | CDS  | 3010008 | 3010133 | -                | /                 | hypothetical protein                             |
| i02_3003  | CDS  | 3010137 | 3010556 | -                | /                 | hypothetical protein                             |
| i02_3004  | CDS  | 3010553 | 3010864 | -                | /                 | hypothetical protein                             |
| i02_3005  | CDS  | 3011027 | 3011800 | -                | /                 | hypothetical protein                             |
| i02_3006  | CDS  | 3011825 | 3012295 | -                | hycl              | hydrogenase 3 maturation protease                |
| i02_3007  | CDS  | 3012288 | 3012698 | -                | hycH              | formate hydrogenlyase maturation protein hycH    |
| i02_3008  | CDS  | 3012695 | 3013462 | -                | hycG              | formate hydrogenlyase subunit 7                  |
| i02_3009  | CDS  | 3013462 | 3014004 | -                | hycF              | formate hydrogenlyase complex iron-sulfur        |

| Locus_tag | Type | start   | End     | +/- <sup>a</sup> | Gene <sup>b</sup> | Product                                                       |
|-----------|------|---------|---------|------------------|-------------------|---------------------------------------------------------------|
| i02_3010  | CDS  | 3014014 | 3015723 | -                | hycE              | formate hydrogenlyase subunit 5 precursor                     |
| i02_3011  | CDS  | 3015741 | 3016664 | -                | hycD              | formate hydrogenlyase subunit 4                               |
| i02_3012  | CDS  | 3016667 | 3018493 | -                | hycC              | formate hydrogenlyase subunit 3                               |
| i02_3013  | CDS  | 3018490 | 3019101 | -                | hycB              | formate hydrogenlyase subunit 2                               |
| i02_3014  | CDS  | 3019226 | 3019687 | -                | hycA              | formate hydrogenlyase regulatory protein HycA                 |
| i02_3015  | CDS  | 3019887 | 3020249 | +                | hypA              | hydrogenase nickel incorporation protein                      |
| i02_3016  | CDS  | 3020253 | 3021125 | +                | hypB              | hydrogenase nickel incorporation protein HypB                 |
| i02_3017  | CDS  | 3021116 | 3021388 | +                | hypC              | hydrogenase assembly chaperone                                |
| i02_3018  | CDS  | 3021388 | 3022509 | +                | hypD              | hydrogenase isoenzyme formation protein hypD                  |
| i02_3019  | CDS  | 3022506 | 3023516 | +                | hypE              | hydrogenase isoenzyme formation protein hypE                  |
| i02_3020  | CDS  | 3023557 | 3025668 | +                | fhIA              | formate hydrogenlyase transcriptional activator               |
| i02_3021  | CDS  | 3025674 | 3026141 | +                | /                 | molybdenum-pterin-binding-protein                             |
| i02_3022  | CDS  | 3026180 | 3026524 | -                | ygbA              | hypothetical protein                                          |
| i02_3023  | CDS  | 3026810 | 3029371 | +                | mutS              | DNA mismatch repair protein MutS                              |
| i02_3024  | CDS  | 3029477 | 3030133 | +                | pphB              | serine/threonine-specific protein phosphatase 2               |
| i02_3025  | CDS  | 3030184 | 3030981 | -                | ygbI              | putative transcriptional regulator YgbI                       |
| i02_3026  | CDS  | 3031147 | 3032055 | +                | ygbJ              | oxidoreductase ygbJ                                           |
| i02_3027  | CDS  | 3032052 | 3033314 | +                | ygbK              | hypothetical protein                                          |
| i02_3028  | CDS  | 3033311 | 3033949 | +                | ygbL              | putative aldolase                                             |
| i02_3029  | CDS  | 3033954 | 3034730 | +                | ygbM              | hypothetical protein                                          |
| i02_3030  | CDS  | 3034819 | 3036183 | +                | ygbN              | inner membrane permease YgbN                                  |
| i02_3031  | CDS  | 3036326 | 3037369 | -                | /                 | hypothetical protein                                          |
| i02_3032  | CDS  | 3037388 | 3037534 | +                | /                 | hypothetical protein                                          |
| i02_3033  | CDS  | 3037594 | 3038145 | +                | /                 | hypothetical protein                                          |
| i02_3034  | CDS  | 3038323 | 3039351 | -                | /                 | hypothetical protein                                          |
| i02_3035  | CDS  | 3039378 | 3040517 | -                | nlpD              | lipoprotein NlpD                                              |
| i02_3036  | CDS  | 3040375 | 3040542 | +                | /                 | hypothetical protein                                          |
| i02_3037  | CDS  | 3040657 | 3041283 | -                | pcm               | protein-L-isoaspartate O-methyltransferase                    |
| i02_3038  | CDS  | 3041277 | 3042083 | -                | surE              | stationary phase survival protein SurE                        |
| i02_3039  | CDS  | 3042019 | 3043068 | -                | truD              | tRNA pseudouridine synthase D                                 |
| i02_3040  | CDS  | 3043065 | 3043544 | -                | ispF              | 2-C-methyl-D-erythritol 2,4-cyclodiphosphate synthase monomer |
| i02_3041  | CDS  | 3043544 | 3044254 | -                | ispD              | 4-diphosphocytidyl-2C-methyl-D-erythritol synthetase monomer  |
| i02_3042  | CDS  | 3044273 | 3044539 | -                | ftsB              | cell division protein FtsB                                    |
| i02_3043  | CDS  | 3044777 | 3045100 | -                | ygbE              | hypothetical protein                                          |
| i02_3044  | CDS  | 3045150 | 3045755 | -                | cysC              | adenylylsulfate kinase                                        |
| i02_3045  | CDS  | 3045755 | 3047182 | -                | cysN              | sulfate adenylyltransferase subunit 1                         |
| i02_3046  | CDS  | 3047184 | 3048092 | -                | cysD              | sulfate adenylyltransferase subunit 2                         |
| i02_3047  | CDS  | 3048344 | 3049381 | +                | iap               | alkaline phosphatase isozyme conversion                       |
| i02_3048  | CDS  | 3049923 | 3050657 | -                | cysH              | phosphoadenosine phosphosulfate reductase                     |
| i02_3049  | CDS  | 3050731 | 3052443 | -                | cysI              | sulfite reductase subunit beta                                |
| i02_3050  | CDS  | 3052443 | 3054242 | -                | cysJ              | sulfite reductase subunit alpha                               |
| i02_3051  | CDS  | 3054474 | 3054923 | +                | ygcM              | putative 6-pyruvoyl tetrahydrobiopterin                       |
| i02_3052  | CDS  | 3054971 | 3056272 | +                | ygcN              | electron transfer flavoprotein-quinone                        |
| i02_3053  | CDS  | 3056227 | 3056523 | +                | ygcO              | ferredoxin-like protein ygcO                                  |
| i02_3054  | CDS  | 3056540 | 3057115 | +                | /                 | putative anti-terminator regulatory protein                   |
| i02_3055  | CDS  | 3057263 | 3058156 | -                | ygcQ              | putative electron transfer flavoprotein subunit               |
| i02_3056  | CDS  | 3058120 | 3058902 | -                | ygcR              | putative electron transfer flavoprotein subunit               |
| i02_3057  | CDS  | 3058874 | 3060283 | -                | ygcS              | metabolite transport protein                                  |
| i02_3058  | CDS  | 3060305 | 3061759 | -                | /                 | hypothetical protein                                          |
| i02_3059  | CDS  | 3061829 | 3062689 | -                | ygcW              | oxidoreductase ygcW                                           |
| i02_3060  | CDS  | 3062933 | 3064210 | +                | yqcE              | hypothetical protein                                          |
| i02_3061  | CDS  | 3064237 | 3065715 | +                | ygcE              | putative sugar kinase ygcE                                    |
| i02_3062  | CDS  | 3066189 | 3066860 | -                | ygcF              | hypothetical protein                                          |
| i02_3063  | CDS  | 3066894 | 3067019 | +                | /                 | hypothetical protein                                          |
| i02_3064  | CDS  | 3067069 | 3067635 | +                | /                 | hypothetical protein                                          |
| i02_3065  | CDS  | 3067619 | 3068527 | +                | /                 | hypothetical protein                                          |

| Locus_tag | Type | start   | End     | +/- <sup>a</sup> | Gene <sup>b</sup> | Product                                      |
|-----------|------|---------|---------|------------------|-------------------|----------------------------------------------|
| i02_3067  | CDS  | 3068542 | 3069696 | +                | /                 | hypothetical protein                         |
| i02_3068  | CDS  | 3069690 | 3070574 | +                | ygcG              | hypothetical protein                         |
| i02_3069  | CDS  | 3070634 | 3071932 | -                | eno               | phosphopyruvate hydratase                    |
| i02_3070  | CDS  | 3072020 | 3073657 | -                | pyrG              | CTP synthetase                               |
| i02_3071  | CDS  | 3073885 | 3074676 | -                | mazG              | nucleoside triphosphate pyrophosphohydrolase |
| i02_3072  | CDS  | 3074772 | 3077006 | -                | relA              | GDP/GTP pyrophosphokinase                    |
| i02_3073  | CDS  | 3077054 | 3078355 | -                | rumA              | 23S rRNA 5-methyluridine methyltransferase   |
| i02_3074  | CDS  | 3078412 | 3081168 | +                | barA              | hybrid sensory histidine kinase BarA         |
| i02_3075  | CDS  | 3081298 | 3081414 | -                | /                 | hypothetical protein                         |
| i02_3076  | CDS  | 3081399 | 3082739 | -                | ygcX              | glucarate dehydratase                        |
| i02_3077  | CDS  | 3082760 | 3084100 | -                | ygcY              | glucarate dehydratase related protein        |
| i02_3078  | CDS  | 3084102 | 3085454 | -                | /                 | glucarate transporter                        |
| i02_3079  | CDS  | 3085547 | 3085672 | -                | /                 | hypothetical protein                         |
| i02_3080  | CDS  | 3085666 | 3085794 | +                | /                 | hypothetical protein                         |
| i02_3081  | CDS  | 3085887 | 3086336 | -                | yqcA              | flavodoxin                                   |
| i02_3082  | CDS  | 3086354 | 3087136 | -                | yqcB              | tRNA pseudouridine synthase C                |
| i02_3083  | CDS  | 3087136 | 3087465 | -                | yqcC              | hypothetical protein                         |
| i02_3084  | CDS  | 3088087 | 3088632 | -                | syd               | SecY interacting protein Syd                 |
| i02_3085  | CDS  | 3088700 | 3089548 | +                | queF              | 7-cyano-7-deazaguanine reductase             |
| i02_3086  | CDS  | 3089660 | 3091024 | +                | ygdH              | hypothetical protein                         |
| i02_3087  | CDS  | 3091108 | 3091239 | +                | /                 | hypothetical protein                         |
| i02_3088  | CDS  | 3091581 | 3092870 | +                | sdaC              | Serine transporter                           |
| i02_3089  | CDS  | 3092928 | 3094295 | +                | sdaB              | L-serine dehydratase 2                       |
| i02_3090  | CDS  | 3094317 | 3095162 | +                | xni               | exonuclease IX                               |
| i02_3091  | CDS  | 3095267 | 3096418 | -                | fucO              | L-1,2-propanediol oxidoreductase             |
| i02_3092  | CDS  | 3096443 | 3097090 | -                | fucA              | L-fuculose phosphate aldolase                |
| i02_3093  | CDS  | 3097280 | 3097417 | +                | /                 | hypothetical protein                         |
| i02_3094  | CDS  | 3097637 | 3098953 | +                | fucP              | L-fucose transporter                         |
| i02_3095  | CDS  | 3098986 | 3100761 | +                | fucI              | L-fucose isomerase                           |
| i02_3096  | CDS  | 3100840 | 3102288 | +                | fucK              | culokinese                                   |
| i02_3097  | CDS  | 3102290 | 3102712 | +                | fucU              | fucose operon fucU protein                   |
| i02_3098  | CDS  | 3102761 | 3103501 | +                | fucR              | DNA-binding transcriptional activator FucR   |
| i02_3099  | CDS  | 3103545 | 3104645 | -                | ygdE              | putative RNA 2'-O-ribose methyltransferase   |
| i02_3100  | CDS  | 3104638 | 3105033 | -                | ygdD              | hypothetical protein                         |
| i02_3101  | CDS  | 3105052 | 3105969 | -                | gcvA              | DNA-binding transcriptional activator GcvA   |
| i02_3102  | CDS  | 3106320 | 3106550 | -                | ygdI              | lipoprotein ygdI precursor                   |
| i02_3103  | CDS  | 3106703 | 3107944 | +                | /                 | cysteine sulfinate desulfinase               |
| i02_3104  | CDS  | 3107944 | 3108387 | +                | ygdK              | hypothetical protein                         |
| i02_3105  | CDS  | 3108438 | 3109244 | -                | ygdL              | hypothetical protein                         |
| i02_3106  | CDS  | 3109321 | 3110418 | -                | mltA              | murein transglycosylase A                    |
| i02_3107  | CDS  | 3111538 | 3112059 | +                | /                 | hypothetical protein                         |
| i02_3108  | CDS  | 3112112 | 3113656 | +                | /                 | hypothetical protein                         |
| i02_3109  | CDS  | 3113676 | 3115013 | +                | /                 | hypothetical protein                         |
| i02_3110  | CDS  | 3115010 | 3115675 | +                | /                 | hypothetical protein                         |
| i02_3111  | CDS  | 3115688 | 3117340 | +                | /                 | hypothetical protein                         |
| i02_3112  | CDS  | 3117398 | 3117889 | +                | /                 | secreted protein Hcp                         |
| i02_3113  | CDS  | 3118081 | 3120717 | +                | /                 | ClpB protein                                 |
| i02_3114  | CDS  | 3120717 | 3123191 | +                | /                 | hypothetical protein                         |
| i02_3115  | CDS  | 3123206 | 3124030 | +                | /                 | hypothetical protein                         |
| i02_3116  | CDS  | 3124027 | 3126003 | +                | /                 | hypothetical protein                         |
| i02_3117  | CDS  | 3126013 | 3126285 | +                | /                 | hypothetical protein                         |
| i02_3118  | CDS  | 3126285 | 3127718 | +                | /                 | hypothetical protein                         |
| i02_3119  | CDS  | 3127800 | 3131063 | +                | /                 | hypothetical protein                         |
| i02_3120  | CDS  | 3131029 | 3132666 | +                | /                 | hypothetical protein                         |
| i02_3121  | CDS  | 3132700 | 3134460 | +                | /                 | hypothetical protein                         |
| i02_3122  | CDS  | 3134424 | 3135503 | +                | /                 | hypothetical protein                         |
| i02_3123  | CDS  | 3135484 | 3136020 | +                | /                 | hypothetical protein                         |
| i02_3124  | CDS  | 3136024 | 3136452 | +                | /                 | hypothetical protein                         |

| Locus_tag | Type | start   | End     | +/- <sup>a</sup> | Gene <sup>b</sup> | Product                                         |
|-----------|------|---------|---------|------------------|-------------------|-------------------------------------------------|
| i02_3125  | CDS  | 3136452 | 3137828 | +                | /                 | hypothetical protein                            |
| i02_3127  | CDS  | 3138128 | 3139084 | -                | /                 | 2-hydroxyacid dehydrogenase                     |
| i02_3128  | CDS  | 3139147 | 3139743 | -                | /                 | phosphosugar isomerase                          |
| i02_3129  | CDS  | 3139746 | 3140921 | -                | /                 | Beta-cystathionase                              |
| i02_3130  | CDS  | 3140921 | 3142501 | -                | /                 | PTS system, maltose and glucose-specific IIABC  |
| i02_3131  | CDS  | 3142533 | 3143414 | -                | /                 | antiterminator                                  |
| i02_3132  | CDS  | 3143453 | 3143605 | +                | /                 | hypothetical protein                            |
| i02_3133  | CDS  | 3143615 | 3144958 | -                | /                 | N-acetylmuramoyl-L-alanine amidase amiC         |
| i02_3134  | CDS  | 3145100 | 3146431 | +                | argA              | N-acetylglutamate synthase                      |
| i02_3135  | CDS  | 3146493 | 3148319 | -                | recD              | exonuclease V subunit alpha                     |
| i02_3136  | CDS  | 3148319 | 3151870 | -                | recB              | exonuclease V subunit beta                      |
| i02_3137  | CDS  | 3151854 | 3154742 | -                | ptr               | protease III                                    |
| i02_3138  | CDS  | 3154918 | 3158286 | -                | recC              | exonuclease V subunit gamma                     |
| i02_3139  | CDS  | 3158299 | 3158622 | -                | ppdC              | hypothetical protein                            |
| i02_3140  | CDS  | 3158607 | 3159014 | -                | ygdB              | hypothetical protein                            |
| i02_3141  | CDS  | 3159011 | 3159814 | -                | ppdB              | hypothetical protein                            |
| i02_3142  | CDS  | 3159565 | 3160035 | -                | ppdA              | hypothetical protein                            |
| i02_3143  | CDS  | 3160220 | 3161014 | -                | thyA              | thymidylate synthase                            |
| i02_3144  | CDS  | 3161021 | 3161896 | -                | lgt               | prolipoprotein diacylglyceryl transferase       |
| i02_3145  | CDS  | 3162047 | 3164293 | -                | ptsP              | fused phosphoenolpyruvate-protein               |
| i02_3146  | CDS  | 3164306 | 3164836 | -                | ygdP              | dinucleoside polyphosphate hydrolase            |
| i02_3147  | CDS  | 3165521 | 3166210 | +                | mutH              | DNA mismatch repair protein                     |
| i02_3148  | CDS  | 3166279 | 3166992 | +                | /                 | hypothetical protein                            |
| i02_3149  | CDS  | 3167130 | 3167348 | +                | ygdR              | lipoprotein ygdR precursor                      |
| i02_3150  | CDS  | 3167456 | 3168496 | +                | tas               | putative aldo-keto reductase                    |
| i02_3151  | CDS  | 3168528 | 3169721 | -                | ygeD              | lysophospholipid transporter LpIT               |
| i02_3152  | CDS  | 3169714 | 3171873 | -                | aas               | bifunctional acyl-[acyl carrier protein]        |
| i02_3153  | CDS  | 3172459 | 3173490 | +                | galR              | DNA-binding transcriptional regulator GalR      |
| i02_3154  | CDS  | 3173497 | 3174759 | -                | lysA              | diaminopimelate decarboxylase                   |
| i02_3155  | CDS  | 3174881 | 3175816 | +                | lysR              | DNA-binding transcriptional regulator LysR      |
| i02_3156  | CDS  | 3175803 | 3176495 | -                | ygeA              | putative racemase                               |
| i02_3157  | CDS  | 3176624 | 3178171 | -                | araE              | arabinose-proton symporter                      |
| i02_3158  | CDS  | 3178357 | 3179118 | -                | kduD              | 2-deoxy-D-gluconate 3-dehydrogenase             |
| i02_3159  | CDS  | 3179148 | 3179984 | -                | kdul              | 5-keto-4-deoxyuronate isomerase                 |
| i02_3160  | CDS  | 3180271 | 3181452 | -                | yqeF              | acetyl-CoA acetyltransferase                    |
| i02_3161  | CDS  | 3181707 | 3182936 | +                | yqeG              | putative transport protein YqeG                 |
| i02_3162  | CDS  | 3183405 | 3184184 | -                | ygeR              | lipoprotein ygeR precursor                      |
| i02_3163  | CDS  | 3184574 | 3186871 | +                | /                 | xanthine dehydrogenase subunit XdhA             |
| i02_3164  | CDS  | 3186882 | 3187760 | +                | ygeT              | xanthine dehydrogenase subunit XdhB             |
| i02_3165  | CDS  | 3187757 | 3188236 | +                | /                 | xanthine dehydrogenase subunit XdhC             |
| i02_3166  | CDS  | 3188276 | 3190054 | -                | ygeV              | putative sigma-54-dependent transcriptional     |
| i02_3167  | CDS  | 3190530 | 3191720 | +                | ygeW              | aspartate/ornithine carbamoyltransferase family |
| i02_3168  | CDS  | 3191778 | 3192974 | +                | ygeX              | diaminopropionate ammonia-lyase                 |
| i02_3169  | CDS  | 3193032 | 3194243 | +                | ygeY              | peptidase                                       |
| i02_3170  | CDS  | 3194297 | 3195682 | +                | ygeZ              | phenylhydantoinase                              |
| i02_3171  | CDS  | 3195730 | 3196662 | +                | yqeA              | carbamate kinase                                |
| i02_3172  | CDS  | 3196703 | 3198328 | -                | yqeB              | hypothetical protein                            |
| i02_3173  | CDS  | 3198376 | 3199146 | -                | yqeC              | hypothetical protein                            |
| i02_3174  | CDS  | 3199250 | 3199828 | +                | ygfJ              | hypothetical protein                            |
| i02_3175  | CDS  | 3200150 | 3203248 | +                | ygfK              | putative selenate reductase subunit YgfK        |
| i02_3176  | CDS  | 3203251 | 3204579 | +                | /                 | putative chlorohydrolase/aminohydrolase         |
| i02_3177  | CDS  | 3204630 | 3205409 | +                | ygfM              | putative selenate reductase subunit YgfM        |
| i02_3178  | CDS  | 3205406 | 3208276 | +                | /                 | putative selenate reductase subunit YgfN        |
| i02_3179  | CDS  | 3208384 | 3209841 | +                | ygfO              | putative purine permease ygfO                   |
| i02_3180  | CDS  | 3209736 | 3211175 | +                | ygfP              | guanine deaminase                               |
| i02_3181  | CDS  | 3211211 | 3212578 | +                | /                 | hypothetical protein                            |
| i02_3182  | CDS  | 3212614 | 3213105 | -                | ygfS              | putative electron transport protein ygfS        |
| i02_3183  | CDS  | 3213102 | 3215036 | -                | ygfT              | putative oxidoreductase Fe-S binding subunit    |

| Locus_tag | Type | start   | End     | +/- <sup>a</sup> | Gene <sup>b</sup> | Product                                        |
|-----------|------|---------|---------|------------------|-------------------|------------------------------------------------|
| i02_3184  | CDS  | 3215328 | 3216905 | +                | ygfU              | putative purine permease ygfU                  |
| i02_3185  | CDS  | 3216907 | 3217032 | +                | /                 | hypothetical protein                           |
| i02_3186  | CDS  | 3217155 | 3217703 | +                | /                 | isopentenyl-diphosphate delta-isomerase        |
| i02_3187  | CDS  | 3217746 | 3219263 | -                | lysS              | lysyl-tRNA synthetase                          |
| i02_3188  | CDS  | 3217863 | 3219278 | +                | /                 | hypothetical protein                           |
| i02_3189  | CDS  | 3219273 | 3220154 | -                | prfB              | peptide chain release factor 2                 |
| i02_3190  | CDS  | 3220155 | 3220310 | +                | /                 | conserved hypothetical protein                 |
| i02_3191  | CDS  | 3220294 | 3220371 | -                | prfB              | peptide chain release factor 2                 |
| i02_3192  | CDS  | 3220462 | 3222195 | -                | recJ              | ssDNA exonuclease RecJ                         |
| i02_3193  | CDS  | 3222201 | 3222911 | -                | dsbC              | thiol:disulfide interchange protein DsbC       |
| i02_3194  | CDS  | 3222936 | 3223832 | -                | xerD              | site-specific tyrosine recombinase XerD        |
| i02_3195  | CDS  | 3223944 | 3224465 | +                | fldB              | flavodoxin FldB                                |
| i02_3196  | CDS  | 3224505 | 3224912 | -                | ygfX              | hypothetical protein                           |
| i02_3197  | CDS  | 3224893 | 3225159 | -                | ygfY              | hypothetical protein                           |
| i02_3198  | CDS  | 3225134 | 3225325 | +                | /                 | hypothetical protein                           |
| i02_3199  | CDS  | 3225402 | 3226382 | +                | ygfZ              | putative global regulator                      |
| i02_3200  | CDS  | 3226459 | 3227118 | -                | yqfA              | hypothetical protein                           |
| i02_3201  | CDS  | 3227282 | 3227593 | -                | yqfB              | hypothetical protein                           |
| i02_3202  | CDS  | 3227614 | 3229071 | +                | bgIA              | 6-phospho-beta-glucosidase BglA                |
| i02_3203  | CDS  | 3229237 | 3232110 | -                | gcvP              | glycine dehydrogenase                          |
| i02_3204  | CDS  | 3232228 | 3232620 | -                | gcvH              | glycine cleavage system protein H              |
| i02_3205  | CDS  | 3232641 | 3233735 | -                | gcvT              | glycine cleavage system aminomethyltransferase |
| i02_3206  | CDS  | 3233743 | 3233898 | -                | /                 | hypothetical protein                           |
| i02_3207  | CDS  | 3233911 | 3234060 | -                | /                 | hypothetical protein                           |
| i02_3208  | CDS  | 3234183 | 3235385 | -                | visC              | hypothetical protein                           |
| i02_3209  | CDS  | 3235408 | 3236586 | -                | ubiH              | 2-octaprenyl-6-methoxyphenyl hydroxylase       |
| i02_3210  | CDS  | 3236583 | 3237908 | -                | pepP              | proline aminopeptidase P II                    |
| i02_3211  | CDS  | 3237934 | 3238512 | -                | ygfB              | hypothetical protein                           |
| i02_3212  | CDS  | 3238680 | 3239009 | +                | ygfE              | Z-ring-associated protein                      |
| i02_3213  | CDS  | 3239309 | 3239857 | +                | ygfA              | putative ligase                                |
| i02_3214  | CDS  | 3240247 | 3241479 | -                | serA              | D-3-phosphoglycerate dehydrogenase             |
| i02_3215  | CDS  | 3241735 | 3242466 | -                | rpiA              | ribose-5-phosphate isomerase A                 |
| i02_3216  | CDS  | 3242450 | 3242728 | -                | yqfE              | hypothetical protein                           |
| i02_3217  | CDS  | 3242732 | 3242845 | -                | /                 | conserved hypothetical protein                 |
| i02_3218  | CDS  | 3242821 | 3243714 | +                | iciA              | chromosome replication initiation inhibitor    |
| i02_3219  | CDS  | 3243917 | 3244972 | +                | /                 | hypothetical protein                           |
| i02_3220  | CDS  | 3244969 | 3245865 | -                | ygfI              | putative transcriptional regulator YgfI        |
| i02_3221  | CDS  | 3246023 | 3246763 | -                | yggE              | hypothetical protein                           |
| i02_3222  | CDS  | 3246856 | 3247491 | -                | yggA              | arginine exporter protein                      |
| i02_3223  | CDS  | 3247630 | 3248490 | -                | yggB              | mechanosensitive channel MscS                  |
| i02_3224  | CDS  | 3248681 | 3249760 | -                | fba               | fructose-bisphosphate aldolase                 |
| i02_3225  | CDS  | 3249974 | 3251194 | -                | pgk               | phosphoglycerate kinase                        |
| i02_3226  | CDS  | 3251187 | 3252206 | -                | epd               | erythrose 4-phosphate dehydrogenase            |
| i02_3227  | CDS  | 3252578 | 3253006 | +                | /                 | hypothetical protein                           |
| i02_3228  | CDS  | 3253033 | 3253611 | +                | /                 | hypothetical protein                           |
| i02_3229  | CDS  | 3253612 | 3254319 | +                | /                 | hypothetical protein                           |
| i02_3230  | CDS  | 3254307 | 3254984 | +                | /                 | ABC transporter ATP-binding protein            |
| i02_3231  | CDS  | 3254945 | 3255655 | +                | /                 | ABC transporter ATP-binding protein            |
| i02_3232  | CDS  | 3255627 | 3256340 | -                | frcK              | putative fructose transport system kinase      |
| i02_3233  | CDS  | 3256337 | 3256846 | -                | yggD              | putative DNA-binding transcriptional regulator |
| i02_3234  | CDS  | 3256995 | 3257183 | -                | /                 | hypothetical protein                           |
| i02_3235  | CDS  | 3257180 | 3258457 | -                | /                 | putative oxidoreductase                        |
| i02_3236  | CDS  | 3258472 | 3259860 | -                | cmtA              | PTS system, mannitol (Cryptic)-specific IIBC   |
| i02_3237  | CDS  | 3259888 | 3260331 | -                | cmtB              | putative mannitol phosphotransferase subunit   |
| i02_3238  | CDS  | 3260648 | 3261616 | +                | /                 | hypothetical protein                           |
| i02_3239  | CDS  | 3261835 | 3263826 | -                | tktA              | transketolase                                  |
| i02_3240  | CDS  | 3263885 | 3264862 | +                | yggG              | putative metalloprotease yggG                  |
| i02_3241  | CDS  | 3265066 | 3265986 | -                | speB              | agmatinase                                     |



| Locus_tag | Type   | start   | End     | +/- <sup>a</sup> | Gene <sup>b</sup> | Product                                      |
|-----------|--------|---------|---------|------------------|-------------------|----------------------------------------------|
| i02_3242  | CDS    | 3266122 | 3266853 | -                | /                 | hypothetical protein                         |
| i02_3243  | CDS    | 3266999 | 3268987 | -                | speA              | arginine decarboxylase                       |
| i02_3244  | CDS    | 3268984 | 3269130 | -                | yqgB              | hypothetical protein                         |
| i02_3245  | CDS    | 3269463 | 3269729 | -                | yqgD              | hypothetical protein                         |
| i02_3246  | CDS    | 3269770 | 3270924 | +                | metK              | S-adenosylmethionine synthetase              |
| i02_3247  | CDS    | 3271348 | 3272754 | +                | galP              | galactose-proton symporter                   |
| i02_3248  | CDS    | 3272777 | 3273328 | +                | sprT              | hypothetical protein                         |
| i02_3249  | CDS    | 3273420 | 3274130 | +                | endA              | endonuclease I precursor                     |
| i02_3250  | CDS    | 3274210 | 3274941 | +                | yggJ              | 16S ribosomal RNA methyltransferase RsmE     |
| i02_3251  | CDS    | 3274954 | 3275904 | +                | gshB              | glutathione synthetase                       |
| i02_3252  | CDS    | 3276013 | 3276576 | +                | yqgE              | hypothetical protein                         |
| i02_3253  | CDS    | 3276576 | 3276992 | +                | yqgF              | Holliday junction resolvase-like protein     |
| i02_3254  | CDS    | 3277166 | 3278221 | -                | yggR              | hypothetical protein                         |
| i02_3255  | CDS    | 3278164 | 3278868 | +                | yggS              | hypothetical protein                         |
| i02_3256  | CDS    | 3278886 | 3279452 | +                | yggT              | hypothetical protein                         |
| i02_3257  | CDS    | 3279449 | 3279739 | +                | yggU              | hypothetical protein                         |
| i02_3258  | CDS    | 3279747 | 3280340 | +                | yggV              | putative deoxyribonucleotide triphosphate    |
| i02_3259  | CDS    | 3280333 | 3281469 | +                | yggW              | coproporphyrinogen III oxidase               |
| i02_3260  | CDS    | 3281538 | 3282545 | -                | yggM              | hypothetical protein                         |
| i02_3261  | CDS    | 3282662 | 3283708 | -                | ansB              | L-asparaginase II                            |
| i02_3262  | CDS    | 3283884 | 3284603 | -                | yggN              | hypothetical protein                         |
| i02_3263  | CDS    | 3284624 | 3284764 | -                | /                 | hypothetical protein                         |
| i02_3264  | CDS    | 3284787 | 3285113 | -                | yggL              | hypothetical protein                         |
| i02_3265  | CDS    | 3285113 | 3285832 | -                | trmB              | tRNA (guanine-N(7)-)-methyltransferase       |
| i02_3266  | CDS    | 3285963 | 3287045 | +                | mutY              | adenine DNA glycosylase                      |
| i02_3267  | CDS    | 3287073 | 3287348 | +                | yggX              | hypothetical protein                         |
| i02_3268  | CDS    | 3287410 | 3288492 | +                | mltC              | murein transglycosylase C                    |
| i02_3269  | CDS    | 3288646 | 3289950 | +                | nupG              | nucleoside permease nupG                     |
| i02_3270  | CDS    | 3289999 | 3292134 | -                | speC              | ornithine decarboxylase                      |
| i02_3271  | CDS    | 3292215 | 3292418 | -                | /                 | hypothetical protein                         |
| i02_3272  | CDS    | 3292533 | 3293240 | +                | yqgA              | hypothetical protein                         |
| i02_3273  | CDS    | 3293619 | 3294884 | +                | /                 | prophage P4 integrase                        |
| i02_3274  | CDS    | 3295110 | 3296183 | +                | /                 | ShiA-like protein                            |
| i02_3275  | CDS    | 3296326 | 3296556 | +                | /                 | hypothetical protein                         |
| i02_3276  | CDS    | 3296713 | 3296988 | +                | insA              | InsA protein                                 |
| i02_3277  | CDS    | 3296907 | 3297410 | +                | insb              | InsB protein                                 |
| i02_3278  | CDS    | 3297877 | 3298428 | -                | papX              | PapX protein                                 |
| i02_3279  | CDS    | 3298542 | 3298667 | +                | /                 | hypothetical protein                         |
| i02_3280  | CDS    | 3298700 | 3299203 | -                | /                 | IS1 protein InsB                             |
| i02_3281  | CDS    | 3299122 | 3299397 | -                | /                 | insertion element IS1 1/2/3/5/6 protein insA |
| i02_3282  | pseudo | 3299426 | 3300015 | -                | /                 | major pilin subunit PapA                     |
| i02_3284  | CDS    | 3300408 | 3300515 | -                | /                 | PapB-like protein                            |
| i02_3286  | CDS    | 3300920 | 3301153 | +                | papI              | PapI protein                                 |
| i02_3287  | pseudo | 3301717 | 3302607 | -                | /                 | transposase IS629                            |
| i02_3288  | CDS    | 3303203 | 3303331 | -                | /                 | hypothetical protein                         |
| i02_3289  | CDS    | 3303670 | 3304374 | -                | /                 | transposase                                  |
| i02_3290  | CDS    | 3304377 | 3304538 | -                | /                 | hypothetical protein                         |
| i02_3291  | CDS    | 3304968 | 3305228 | +                | /                 | hypothetical protein                         |
| i02_3292  | CDS    | 3305270 | 3305830 | +                | /                 | hypothetical protein                         |
| i02_3293  | CDS    | 3305840 | 3306298 | +                | /                 | hypothetical protein                         |
| i02_3294  | CDS    | 3306962 | 3307372 | +                | /                 | transposase insC                             |
| i02_3294a | CDS    | 3307330 | 3308235 | +                | /                 | insertion element IS2 transposase InsD       |
| i02_3295  | CDS    | 3308735 | 3310825 | +                | /                 | bifunctional enterobactin receptor/adhesin   |
| i02_3296  | CDS    | 3311059 | 3311283 | +                | /                 | hypothetical protein                         |
| i02_3297  | CDS    | 3311609 | 3311929 | +                | /                 | hypothetical protein                         |
| i02_3298  | CDS    | 3312017 | 3312208 | +                | /                 | hypothetical protein                         |
| i02_3299  | CDS    | 3312205 | 3312588 | +                | /                 | hypothetical protein                         |
| i02_3300  | CDS    | 3312592 | 3312807 | +                | /                 | hypothetical protein                         |

| Locus_tag | Type   | start   | End     | +/- <sup>a</sup> | Gene <sup>b</sup> | Product                                 |
|-----------|--------|---------|---------|------------------|-------------------|-----------------------------------------|
| i02_3301  | CDS    | 3312949 | 3313179 | -                | /                 | conserved hypothetical protein          |
| i02_3302  | CDS    | 3313310 | 3313582 | -                | /                 | putative transposase                    |
| i02_3303  | CDS    | 3314057 | 3314260 | +                | /                 | conserved hypothetical protein          |
| i02_3304  | CDS    | 3314270 | 3314692 | -                | /                 | IS1353 transposase family protein       |
| i02_3305  | CDS    | 3314765 | 3315304 | -                | /                 | transposase                             |
| i02_3307  | CDS    | 3315341 | 3315802 | -                | /                 | transposase IS3 family                  |
| i02_3308  | CDS    | 3316218 | 3316673 | -                | /                 | hypothetical protein                    |
| i02_3309  | CDS    | 3316685 | 3317503 | -                | /                 | transposase insF                        |
| i02_3310  | CDS    | 3317588 | 3318739 | -                | insI              | transposase insI                        |
| i02_3311  | CDS    | 3318696 | 3319064 | -                | /                 | hypothetical protein                    |
| i02_3312  | CDS    | 3319116 | 3319406 | -                | /                 | hypothetical protein                    |
| i02_3313  | CDS    | 3319336 | 3323235 | -                | sat               | Aecreted auto transpoter toxin          |
| i02_3315  | CDS    | 3323473 | 3323616 | +                | /                 | hypothetical protein                    |
| i02_3316  | CDS    | 3324167 | 3326392 | -                | iutA              | lutA protein                            |
| i02_3317  | CDS    | 3326450 | 3327727 | -                | iucD              | lucD protein                            |
| i02_3318  | CDS    | 3327724 | 3329466 | -                | iucC              | lucC protein                            |
| i02_3319  | CDS    | 3329466 | 3330413 | -                | iucB              | lucB protein                            |
| i02_3320  | CDS    | 3330414 | 3332156 | -                | iucA              | lucA protein                            |
| i02_3321  | CDS    | 3332274 | 3333467 | +                | shiF              | shiF protein                            |
| i02_3323  | CDS    | 3333580 | 3334485 | -                | /                 | insertion element IS2 transposase InsD  |
| i02_3324  | CDS    | 3334443 | 3334853 | -                | /                 | transposase insC                        |
| i02_3325  | CDS    | 3334960 | 3335949 | -                | /                 | hypothetical protein                    |
| i02_3326  | CDS    | 3336039 | 3336422 | -                | /                 | hypothetical protein                    |
| i02_3327  | CDS    | 3336698 | 3336829 | -                | /                 | hypothetical protein                    |
| i02_3328  | CDS    | 3336816 | 3337751 | -                | /                 | hypothetical protein                    |
| i02_3329  | CDS    | 3337801 | 3338919 | -                | /                 | hypothetical protein                    |
| i02_3330  | CDS    | 3338923 | 3339663 | -                | /                 | hypothetical protein                    |
| i02_3331  | CDS    | 3339679 | 3340488 | -                | /                 | hypothetical protein                    |
| i02_3332  | CDS    | 3340513 | 3341985 | -                | /                 | putative sialic acid transporter        |
| i02_3333  | CDS    | 3342034 | 3342909 | -                | /                 | N-acetylmannosamine kinase              |
| i02_3334  | CDS    | 3342943 | 3343860 | -                | /                 | N-acetylneuraminase lyase               |
| i02_3335  | CDS    | 3344584 | 3344946 | +                | /                 | hypothetical protein                    |
| i02_3336  | CDS    | 3344943 | 3345293 | +                | /                 | hypothetical protein                    |
| i02_3337  | CDS    | 3345324 | 3346424 | +                | /                 | hypothetical protein                    |
| i02_3338  | CDS    | 3346421 | 3347959 | +                | /                 | hypothetical protein                    |
| i02_3339  | CDS    | 3347875 | 3348069 | -                | /                 | hypothetical protein                    |
| i02_3340  | CDS    | 3348180 | 3348569 | -                | /                 | hypothetical protein                    |
| i02_3341  | CDS    | 3348730 | 3349299 | -                | /                 | hypothetical protein                    |
| i02_3342  | CDS    | 3349501 | 3349695 | +                | /                 | predicted protein                       |
| i02_3343  | CDS    | 3350028 | 3350252 | -                | /                 | hemolysin expression modulating protein |
| i02_3344  | CDS    | 3350776 | 3350898 | -                | /                 | hypothetical protein                    |
| i02_3345  | CDS    | 3351071 | 3351331 | +                | /                 | hypothetical protein                    |
| i02_3346  | CDS    | 3351390 | 3351989 | +                | /                 | hypothetical protein                    |
| i02_3347  | CDS    | 3352110 | 3353618 | -                | /                 | hypothetical protein                    |
| i02_3348  | CDS    | 3353795 | 3354016 | -                | /                 | hypothetical protein                    |
| i02_3349  | CDS    | 3354031 | 3354153 | -                | /                 | conserved hypothetical protein          |
| i02_3350  | CDS    | 3354932 | 3355804 | +                | /                 | hypothetical protein                    |
| i02_3351  | CDS    | 3356132 | 3359260 | +                | /                 | antigen 43 precursor                    |
| i02_3352  | CDS    | 3360558 | 3361013 | +                | /                 | hypothetical protein                    |
| i02_3353  | CDS    | 3361092 | 3361325 | +                | /                 | hypothetical protein                    |
| i02_3354  | CDS    | 3361426 | 3362244 | +                | /                 | hypothetical protein                    |
| i02_3355  | CDS    | 3362353 | 3363264 | -                | /                 | hypothetical protein                    |
| i02_3356  | CDS    | 3362785 | 3363276 | +                | /                 | putative radC-like protein yeeS         |
| i02_3357  | CDS    | 3363273 | 3364001 | -                | /                 | hypothetical protein                    |
| i02_3358  | CDS    | 3363579 | 3364223 | +                | /                 | hypothetical protein                    |
| i02_3359  | pseudo | 3364246 | 3364809 | -                | /                 | hypothetical protein                    |
| i02_3360  | CDS    | 3364730 | 3365107 | +                | /                 | hypothetical protein                    |
| i02_3361  | CDS    | 3365104 | 3365592 | +                | /                 | hypothetical protein                    |

| Locus_tag | Type | start   | End     | +/- <sup>a</sup> | Gene <sup>b</sup> | Product                                         |
|-----------|------|---------|---------|------------------|-------------------|-------------------------------------------------|
| i02_3362  | CDS  | 3365891 | 3366736 | +                | /                 | hypothetical protein                            |
| i02_3363  | CDS  | 3366805 | 3367200 | +                | /                 | hypothetical protein                            |
| i02_3364  | CDS  | 3367193 | 3367933 | +                | /                 | hypothetical protein                            |
| i02_3365  | CDS  | 3367926 | 3368126 | +                | /                 | hypothetical protein                            |
| i02_3366  | CDS  | 3368558 | 3368713 | +                | /                 | hypothetical protein                            |
| i02_3367  | CDS  | 3368881 | 3369024 | -                | /                 | hypothetical protein                            |
| i02_3368  | CDS  | 3369488 | 3370507 | +                | /                 | hypothetical protein                            |
| i02_3369  | CDS  | 3370579 | 3371727 | +                | kpsE              | KpsE protein                                    |
| i02_3370  | CDS  | 3371748 | 3373427 | +                | kpsD              | KpsD protein                                    |
| i02_3371  | CDS  | 3373437 | 3374177 | +                | /                 | 3-deoxy-manno-octulosonate cytidyltransferase   |
| i02_3372  | CDS  | 3374174 | 3376201 | +                | kpsC              | KpsC protein                                    |
| i02_3373  | CDS  | 3376236 | 3377405 | +                | kpsS              | KpsS protein                                    |
| i02_3373a | CDS  | 3377747 | 3378937 | -                | kfiD              | UDP-glucose 6-dehydrogenase                     |
| i02_3374  | CDS  | 3378964 | 3380526 | -                | /                 | glycosyltransferase KfiC                        |
| i02_3375  | CDS  | 3381222 | 3381524 | +                | /                 | conserved hypothetical protein                  |
| i02_3376  | CDS  | 3381818 | 3383506 | -                | kfiB              | kfiB protein                                    |
| i02_3377  | CDS  | 3385642 | 3386316 | -                | kpsT              | KpsT protein                                    |
| i02_3378  | CDS  | 3386313 | 3387089 | -                | kpsM              | KpsM protein                                    |
| i02_3379  | CDS  | 3388147 | 3388683 | -                | yghD              | putative general secretion pathway protein YghD |
| i02_3380  | CDS  | 3388685 | 3389545 | -                | gspL              | GspL-like protein                               |
| i02_3381  | CDS  | 3389860 | 3390837 | -                | /                 | hypothetical protein                            |
| i02_3382  | CDS  | 3390834 | 3391439 | -                | gspJ              | putative type II secretion protein GspJ         |
| i02_3383  | CDS  | 3391436 | 3391807 | -                | gspI              | putative type II secretion protein GspI         |
| i02_3384  | CDS  | 3391804 | 3392367 | -                | gspH              | putative type II secretion protein GspH         |
| i02_3385  | CDS  | 3392371 | 3392826 | -                | gspG              | putative type II secretion protein GspG         |
| i02_3386  | CDS  | 3392843 | 3394066 | -                | gspF              | putative type II secretion protein GspF         |
| i02_3387  | CDS  | 3394066 | 3395559 | -                | gspE              | putative type II secretion protein GspE         |
| i02_3388  | CDS  | 3395559 | 3397619 | -                | gspD              | putative type II secretion protein GspD         |
| i02_3389  | CDS  | 3397649 | 3398491 | -                | gspC              | putative type II secretion protein GspC         |
| i02_3390  | CDS  | 3398626 | 3399036 | -                | /                 | hypothetical protein                            |
| i02_3391  | CDS  | 3399102 | 3399992 | -                | pppA              | putative prepilin peptidase A                   |
| i02_3392  | CDS  | 3400041 | 3404597 | -                | yghJ              | putative lipoprotein AcfD-like precursor        |
| i02_3393  | CDS  | 3404748 | 3404948 | +                | /                 | hypothetical protein                            |
| i02_3394  | CDS  | 3404945 | 3405067 | -                | /                 | conserved hypothetical protein                  |
| i02_3395  | CDS  | 3405082 | 3406764 | -                | yghK              | glycolate transporter                           |
| i02_3396  | CDS  | 3407119 | 3409290 | -                | glcB              | malate synthase G                               |
| i02_3397  | CDS  | 3409312 | 3409734 | -                | glcG              | hypothetical protein                            |
| i02_3398  | CDS  | 3409721 | 3410944 | -                | pir               | glycolate oxidase iron-sulfur subunit           |
| i02_3399  | CDS  | 3410955 | 3412007 | -                | glcE              | glycolate oxidase FAD binding subunit           |
| i02_3400  | CDS  | 3412007 | 3413506 | -                | glcD              | glycolate oxidase subunit GlcD                  |
| i02_3401  | CDS  | 3413697 | 3414521 | +                | glcC              | DNA-binding transcriptional regulator GlcC      |
| i02_3402  | CDS  | 3414528 | 3415679 | -                | yghO              | hypothetical protein                            |
| i02_3403  | CDS  | 3416032 | 3417762 | +                | /                 | acyl-CoA synthetase                             |
| i02_3404  | CDS  | 3417549 | 3418673 | +                | /                 | hypothetical protein                            |
| i02_3405  | CDS  | 3418705 | 3418953 | +                | /                 | hypothetical protein                            |
| i02_3406  | CDS  | 3418953 | 3420125 | +                | /                 | hypothetical protein                            |
| i02_3407  | CDS  | 3420160 | 3421320 | -                | /                 | hypothetical protein                            |
| i02_3408  | CDS  | 3421236 | 3422306 | -                | /                 | hypothetical protein                            |
| i02_3409  | CDS  | 3422337 | 3422897 | -                | /                 | hypothetical protein                            |
| i02_3410  | CDS  | 3422897 | 3423733 | -                | /                 | hypothetical protein                            |
| i02_3411  | CDS  | 3423733 | 3425082 | -                | yghQ              | hypothetical protein                            |
| i02_3412  | CDS  | 3425128 | 3425898 | -                | yghR              | ATP-binding protein yghR                        |
| i02_3413  | CDS  | 3425918 | 3426631 | -                | yghS              | ATP-binding protein yghS                        |
| i02_3414  | CDS  | 3426806 | 3427498 | +                | yghT              | ATP-binding protein yghT                        |
| i02_3415  | CDS  | 3427547 | 3429046 | -                | pitB              | inorganic phosphate transporter                 |
| i02_3416  | CDS  | 3429338 | 3431200 | -                | gsp               | bifunctional glutathionylspermidine             |
| i02_3417  | CDS  | 3431354 | 3432268 | +                | yghU              | putative glutathione S-transferase YghU         |
| i02_3418  | CDS  | 3432410 | 3432658 | -                | hybG              | hydrogenase 2 accessory protein HypG            |

| Locus_tag | Type | start   | End     | +/- <sup>a</sup> | Gene <sup>b</sup> | Product                                        |
|-----------|------|---------|---------|------------------|-------------------|------------------------------------------------|
| i02_3419  | CDS  | 3432671 | 3433066 | -                | hypA              | hydrogenase nickel incorporation protein HybF  |
| i02_3420  | CDS  | 3433005 | 3433493 | -                | hybE              | hydrogenase 2-specific chaperone               |
| i02_3421  | CDS  | 3433486 | 3433980 | -                | hybD              | hydrogenase 2 maturation endopeptidase         |
| i02_3422  | CDS  | 3433980 | 3435683 | -                | hybC              | hydrogenase 2 large subunit                    |
| i02_3423  | CDS  | 3435680 | 3436858 | -                | hybB              | putative hydrogenase 2 b cytochrome subunit    |
| i02_3424  | CDS  | 3436848 | 3437834 | -                | hybA              | hydrogenase 2 protein HybA                     |
| i02_3425  | CDS  | 3437837 | 3438955 | -                | /                 | hydrogenase 2 small subunit                    |
| i02_3426  | CDS  | 3438939 | 3439067 | +                | /                 | hypothetical protein                           |
| i02_3427  | CDS  | 3439144 | 3439431 | -                | yghW              | hypothetical protein                           |
| i02_3428  | CDS  | 3439550 | 3440476 | -                | /                 | hypothetical protein                           |
| i02_3429  | CDS  | 3440594 | 3441634 | +                | yghZ              | aldo-keto reductase                            |
| i02_3430  | CDS  | 3441674 | 3442198 | -                | yqhA              | hypothetical protein                           |
| i02_3431  | CDS  | 3442359 | 3443243 | +                | yghA              | oxidoreductase                                 |
| i02_3432  | CDS  | 3443282 | 3443707 | -                | exbD              | biopolymer transport protein ExbD              |
| i02_3433  | CDS  | 3443714 | 3444448 | -                | exbB              | biopolymer transport protein ExbB              |
| i02_3434  | CDS  | 3444565 | 3445887 | +                | metC              | cystathionine beta-lyase                       |
| i02_3435  | CDS  | 3446027 | 3446686 | +                | yghB              | hypothetical protein                           |
| i02_3436  | CDS  | 3446726 | 3447853 | -                | yqhC              | putative transcriptional regulator YqhC        |
| i02_3437  | CDS  | 3447819 | 3448982 | +                | yqhD              | oxidoreductase yqhD                            |
| i02_3438  | CDS  | 3449087 | 3449914 | +                | dkgA              | 2,5-diketo-D-gluconate reductase A             |
| i02_3439  | CDS  | 3450114 | 3451040 | +                | yqhG              | hypothetical protein                           |
| i02_3440  | CDS  | 3451091 | 3451348 | +                | yqhH              | putative outer membrane lipoprotein            |
| i02_3441  | CDS  | 3451390 | 3453609 | -                | /                 | hypothetical protein                           |
| i02_3442  | CDS  | 3453861 | 3454610 | +                | /                 | putative regulator                             |
| i02_3443  | CDS  | 3454897 | 3456405 | +                | /                 | oxidoreductase ydfI                            |
| i02_3444  | CDS  | 3456402 | 3457418 | +                | /                 | hypothetical protein                           |
| i02_3445  | CDS  | 3457429 | 3458439 | +                | /                 | ureidoglycolate dehydrogenase                  |
| i02_3446  | CDS  | 3458512 | 3459495 | +                | /                 | putative c4-dicarboxylate transport system     |
| i02_3447  | CDS  | 3459537 | 3460019 | +                | /                 | hypothetical protein                           |
| i02_3448  | CDS  | 3459988 | 3461334 | +                | ygiK              | c4-dicarboxylate permease                      |
| i02_3449  | CDS  | 3461405 | 3462817 | -                | sufI              | repressor protein for FtsI                     |
| i02_3450  | CDS  | 3462892 | 3463629 | -                | plsC              | 1-acyl-sn-glycerol-3-phosphate acyltransferase |
| i02_3451  | CDS  | 3463678 | 3463833 | -                | /                 | hypothetical protein                           |
| i02_3452  | CDS  | 3463864 | 3466122 | -                | parC              | DNA topoisomerase IV subunit A                 |
| i02_3453  | CDS  | 3466260 | 3467930 | -                | /                 | putative binding protein                       |
| i02_3454  | CDS  | 3467976 | 3468458 | -                | ygiV              | hypothetical protein                           |
| i02_3455  | CDS  | 3468511 | 3468960 | -                | ygiW              | hypothetical protein                           |
| i02_3456  | CDS  | 3469055 | 3469714 | +                | ygiX              | DNA-binding transcriptional regulator QseB     |
| i02_3457  | CDS  | 3469711 | 3471060 | +                | ygiY              | sensor protein QseC                            |
| i02_3458  | CDS  | 3471106 | 3471438 | -                | /                 | hypothetical protein                           |
| i02_3459  | CDS  | 3471445 | 3472182 | -                | /                 | hypothetical protein                           |
| i02_3460  | CDS  | 3472158 | 3472637 | -                | /                 | hypothetical protein                           |
| i02_3461  | CDS  | 3472887 | 3473468 | +                | mdaB              | modulator of drug activity B                   |
| i02_3462  | CDS  | 3473499 | 3473813 | +                | ygiN              | hypothetical protein                           |
| i02_3463  | CDS  | 3473858 | 3474745 | -                | /                 | hypothetical protein                           |
| i02_3464  | CDS  | 3474742 | 3475752 | -                | /                 | iron ABC transporter substrate-binding protein |
| i02_3465  | CDS  | 3475700 | 3476749 | -                | /                 | iron ABC transporter permease                  |
| i02_3466  | CDS  | 3476746 | 3477729 | -                | /                 | iron ABC transporter permease                  |
| i02_3467  | CDS  | 3477726 | 3478535 | -                | /                 | ferric enterobactin transport ATP-binding      |
| i02_3468  | CDS  | 3478615 | 3478734 | -                | /                 | hypothetical protein                           |
| i02_3469  | CDS  | 3478909 | 3481050 | +                | /                 | putative iron compound receptor                |
| i02_3470  | CDS  | 3481114 | 3483006 | -                | parE              | DNA topoisomerase IV subunit B                 |
| i02_3471  | CDS  | 3483035 | 3483616 | -                | yqiA              | esterase YqiA                                  |
| i02_3472  | CDS  | 3483616 | 3484443 | -                | icc               | cyclic 3',5'-adenosine monophosphate           |
| i02_3473  | CDS  | 3484468 | 3484890 | -                | yqiB              | hypothetical protein                           |
| i02_3474  | CDS  | 3484891 | 3485520 | -                | nudF              | ADP-ribose pyrophosphatase NudF                |
| i02_3475  | CDS  | 3485719 | 3487206 | +                | tolC              | outer membrane channel protein                 |
| i02_3476  | CDS  | 3487206 | 3487466 | +                | ygiA              | hypothetical protein                           |

| Locus_tag | Type | start   | End     | +/- <sup>a</sup> | Gene <sup>b</sup> | Product                                         |
|-----------|------|---------|---------|------------------|-------------------|-------------------------------------------------|
| i02_3477  | CDS  | 3487321 | 3488025 | +                | ygiB              | hypothetical protein                            |
| i02_3478  | CDS  | 3488031 | 3489191 | +                | ygiC              | hypothetical protein                            |
| i02_3479  | CDS  | 3489676 | 3491472 | +                | asst              | arylsulfate sulfotransferase                    |
| i02_3480  | CDS  | 3491490 | 3492158 | +                | /                 | putative disulfide isomerase                    |
| i02_3481  | CDS  | 3492173 | 3492844 | +                | /                 | putative disulfide oxidoreductase               |
| i02_3482  | CDS  | 3492890 | 3493705 | -                | ygiD              | hypothetical protein                            |
| i02_3483  | CDS  | 3493779 | 3494594 | +                | ygiE              | zinc transporter ZupT                           |
| i02_3484  | CDS  | 3494656 | 3494841 | -                | /                 | hypothetical protein                            |
| i02_3485  | CDS  | 3495397 | 3495960 | +                | ygiL              | putative fimbrial protein                       |
| i02_3486  | CDS  | 3496047 | 3498569 | +                | yqiG              | outer membrane usher protein yqiG precursor     |
| i02_3487  | CDS  | 3498576 | 3499325 | +                | yqiH              | fimbrial chaperone yqiH precursor               |
| i02_3488  | CDS  | 3499322 | 3500371 | +                | /                 | hypothetical protein                            |
| i02_3489  | CDS  | 3500425 | 3501078 | -                | ribB              | 3,4-dihydroxy-2-butanone 4-phosphate synthase   |
| i02_3490  | CDS  | 3501392 | 3501751 | +                | yqiC              | hypothetical protein                            |
| i02_3491  | CDS  | 3501786 | 3501992 | -                | glgS              | glycogen synthesis protein GlgS                 |
| i02_3492  | CDS  | 3502256 | 3502885 | +                | yqiJ              | hypothetical protein                            |
| i02_3493  | CDS  | 3502912 | 3504573 | +                | yqiK              | hypothetical protein                            |
| i02_3494  | CDS  | 3504992 | 3506425 | -                | /                 | bifunctional heptose 7-phosphate kinase/heptose |
| i02_3495  | CDS  | 3506473 | 3509385 | -                | glnE              | bifunctional glutamine-synthetase               |
| i02_3496  | CDS  | 3509336 | 3510664 | -                | ygiF              | hypothetical protein                            |
| i02_3497  | CDS  | 3510707 | 3511159 | -                | /                 | putative transposase                            |
| i02_3498  | CDS  | 3511172 | 3512377 | +                | ydcM              | hypothetical protein                            |
| i02_3499  | CDS  | 3512495 | 3512680 | -                | /                 | hypothetical protein                            |
| i02_3500  | CDS  | 3512720 | 3513340 | +                | ygiM              | putative signal transduction protein            |
| i02_3501  | CDS  | 3513404 | 3514642 | +                | cca               | multifunctional tRNA nucleotidyl                |
| i02_3502  | CDS  | 3514722 | 3515546 | -                | uppP              | undecaprenyl pyrophosphate phosphatase          |
| i02_3503  | CDS  | 3515634 | 3516005 | -                | folB              | bifunctional dihydroneopterin                   |
| i02_3504  | CDS  | 3516107 | 3516724 | +                | ygiH              | putative glycerol-3-phosphate acyltransferase   |
| i02_3505  | CDS  | 3516737 | 3517723 | -                | ygiP              | transcriptional activator TtdR                  |
| i02_3506  | CDS  | 3517700 | 3517822 | +                | /                 | hypothetical protein                            |
| i02_3507  | CDS  | 3517876 | 3518787 | +                | ttdA              | tartrate dehydratase subunit alpha              |
| i02_3508  | CDS  | 3518784 | 3519389 | +                | ttdB              | L(+)-tartrate dehydratase subunit beta          |
| i02_3509  | CDS  | 3519437 | 3520900 | +                | ygiE              | putative tartrate carrier/transporter           |
| i02_3510  | CDS  | 3520943 | 3521956 | -                | ygiD              | putative DNA-binding/iron metalloprotein        |
| i02_3511  | CDS  | 3522194 | 3522409 | +                | rpsU              | 30S ribosomal protein S21                       |
| i02_3512  | CDS  | 3522520 | 3524265 | +                | dnaG              | DNA primase                                     |
| i02_3513  | CDS  | 3524279 | 3524401 | +                | /                 | hypothetical protein                            |
| i02_3514  | CDS  | 3524460 | 3526301 | +                | /                 | hypothetical protein                            |
| i02_3515  | CDS  | 3524571 | 3526355 | -                | /                 | hypothetical protein                            |
| i02_3516  | CDS  | 3526379 | 3526885 | -                | ygiF              | G/U mismatch-specific DNA glycosylase           |
| i02_3517  | CDS  | 3527139 | 3527918 | -                | yqiH              | hypothetical protein                            |
| i02_3518  | CDS  | 3528191 | 3528814 | +                | yqjI              | hypothetical protein                            |
| i02_3519  | CDS  | 3528968 | 3530488 | -                | aer               | aerotaxis receptor                              |
| i02_3520  | CDS  | 3530795 | 3532285 | +                | ygiG              | putrescine--2-oxoglutarate aminotransferase     |
| i02_3521  | CDS  | 3532269 | 3532679 | +                | /                 | hypothetical protein                            |
| i02_3522  | CDS  | 3532766 | 3532948 | +                | /                 | hypothetical protein                            |
| i02_3523  | CDS  | 3532878 | 3533861 | +                | ebgR              | DNA-binding transcriptional repressor EbgR      |
| i02_3524  | CDS  | 3534009 | 3537137 | +                | ebgA              | cryptic beta-D-galactosidase subunit alpha      |
| i02_3525  | CDS  | 3537134 | 3537583 | +                | ebgC              | cryptic beta-D-galactosidase subunit beta       |
| i02_3527  | CDS  | 3537646 | 3539079 | +                | ygiI              | putative transporter YgiI                       |
| i02_3528  | CDS  | 3539213 | 3540283 | +                | ygiJ              | hypothetical protein                            |
| i02_3529  | CDS  | 3540300 | 3542651 | +                | ygiK              | putative glycosyl hydrolase                     |
| i02_3530  | CDS  | 3542877 | 3544895 | +                | ygiL              | 2,4-dienoyl-CoA reductase                       |
| i02_3531  | CDS  | 3544940 | 3545356 | -                | /                 | hypothetical protein                            |
| i02_3532  | CDS  | 3545353 | 3545523 | -                | /                 | hypothetical protein                            |
| i02_3533  | CDS  | 3545627 | 3546763 | -                | ygiO              | putative ribosomal RNA small subunit            |
| i02_3534  | CDS  | 3546812 | 3547351 | +                | ygiP              | hypothetical protein                            |
| i02_3535  | CDS  | 3547419 | 3548120 | +                | ygiQ              | hypothetical protein                            |

| Locus_tag | Type | start   | End     | +/- <sup>a</sup> | Gene <sup>b</sup> | Product                                                      |
|-----------|------|---------|---------|------------------|-------------------|--------------------------------------------------------------|
| i02_3536  | CDS  | 3548181 | 3549185 | +                | ygjR              | oxidoreductase ygjR                                          |
| i02_3537  | CDS  | 3549469 | 3550434 | +                | ygjT              | hypothetical protein                                         |
| i02_3538  | CDS  | 3550758 | 3552002 | +                | ygjU              | serine/threonine transporter SstT                            |
| i02_3539  | CDS  | 3552006 | 3552557 | -                | ygjV              | hypothetical protein                                         |
| i02_3540  | CDS  | 3552640 | 3554127 | -                | uxaA              | Altronate hydrolase                                          |
| i02_3541  | CDS  | 3554142 | 3555554 | -                | uxaC              | glucuronate isomerase                                        |
| i02_3542  | CDS  | 3555917 | 3557335 | +                | exuT              | hexuronate transporter                                       |
| i02_3543  | CDS  | 3557450 | 3558241 | +                | exuR              | DNA-binding transcriptional repressor ExuR                   |
| i02_3544  | CDS  | 3558586 | 3559248 | +                | yqjA              | hypothetical protein                                         |
| i02_3545  | CDS  | 3559252 | 3559635 | +                | yqjB              | hypothetical protein                                         |
| i02_3546  | CDS  | 3559782 | 3560150 | +                | yqjC              | hypothetical protein                                         |
| i02_3547  | CDS  | 3560188 | 3560493 | +                | yqjD              | hypothetical protein                                         |
| i02_3548  | CDS  | 3560427 | 3560900 | +                | yqjE              | hypothetical protein                                         |
| i02_3549  | CDS  | 3560848 | 3561189 | +                | yqjK              | hypothetical protein                                         |
| i02_3550  | CDS  | 3561286 | 3561768 | +                | yqjF              | hypothetical protein                                         |
| i02_3551  | CDS  | 3561838 | 3562824 | +                | yqjG              | putative glutathione S-transferase                           |
| i02_3552  | CDS  | 3563086 | 3563475 | +                | yhaH              | hypothetical protein                                         |
| i02_3553  | CDS  | 3563509 | 3564405 | -                | yhaJ              | putative transcriptional regulator YhaJ                      |
| i02_3554  | CDS  | 3564510 | 3565211 | +                | yhaK              | hypothetical protein                                         |
| i02_3555  | CDS  | 3565228 | 3565398 | +                | yhaL              | hypothetical protein                                         |
| i02_3556  | CDS  | 3565532 | 3566842 | -                | /                 | hypothetical protein                                         |
| i02_3557  | CDS  | 3566870 | 3568201 | -                | /                 | putative amino acid permease                                 |
| i02_3558  | CDS  | 3568479 | 3569849 | -                | /                 | L-serine dehydratase 1                                       |
| i02_3559  | CDS  | 3569915 | 3570367 | -                | yhaR              | hypothetical protein                                         |
| i02_3560  | CDS  | 3570318 | 3572612 | -                | tdcE              | keto-acid formate acetyltransferase                          |
| i02_3561  | CDS  | 3572646 | 3573866 | -                | tdcD              | propionate/acetate kinase                                    |
| i02_3562  | CDS  | 3573880 | 3575211 | -                | tdcC              | threonine/serine transporter TdcC                            |
| i02_3563  | CDS  | 3575233 | 3576222 | -                | tdcB              | threonine dehydratase                                        |
| i02_3564  | CDS  | 3576321 | 3577259 | -                | tdcA              | DNA-binding transcriptional activator TdcA                   |
| i02_3565  | CDS  | 3577448 | 3577792 | +                | tdcR              | DNA-binding transcriptional activator TdcR                   |
| i02_3566  | CDS  | 3578018 | 3578146 | +                | /                 | hypothetical protein                                         |
| i02_3567  | CDS  | 3578306 | 3578830 | +                | /                 | hypothetical protein                                         |
| i02_3568  | CDS  | 3578758 | 3579984 | -                | yhaD              | glycerate kinase I                                           |
| i02_3569  | CDS  | 3580000 | 3580899 | -                | garR              | tartronate semialdehyde reductase                            |
| i02_3570  | CDS  | 3580920 | 3581690 | -                | yhaF              | alpha-dehydro-beta-deoxy-D-glucarate aldolase                |
| i02_3571  | CDS  | 3581706 | 3583040 | -                | yhaU              | galactarate transporter                                      |
| i02_3572  | CDS  | 3583249 | 3583368 | +                | /                 | hypothetical protein                                         |
| i02_3573  | CDS  | 3583415 | 3584986 | +                | yhaG              | D-galactarate dehydratase                                    |
| i02_3574  | CDS  | 3585135 | 3585470 | +                | sohA              | putative regulator PrIF                                      |
| i02_3575  | CDS  | 3585470 | 3585934 | +                | yhaV              | hypothetical protein                                         |
| i02_3576  | CDS  | 3585989 | 3586798 | -                | agaR              | DNA-binding transcriptional regulator AgaR                   |
| i02_3577  | CDS  | 3587047 | 3588327 | +                | agaZ              | putative tagatose 6-phosphate kinase agaZ                    |
| i02_3578  | CDS  | 3588314 | 3588823 | +                | agaV              | N-acetylgalactosamine-specific PTS system                    |
| i02_3579  | CDS  | 3588834 | 3589613 | +                | /                 | putative phosphotransferase system enzyme                    |
| i02_3580  | CDS  | 3589597 | 3590481 | +                | /                 | PTS system, N-acetylgalactosamine-specific IID               |
| i02_3581  | CDS  | 3590499 | 3590933 | +                | /                 | putative phosphotransferase system enzyme                    |
| i02_3582  | CDS  | 3590909 | 3592063 | +                | /                 | putative N-acetylgalactosamine-6-phosphate                   |
| i02_3583  | CDS  | 3592412 | 3593566 | +                | agaS              | putative tagatose-6-phosphate aldose/ketose isomerase (AgaS) |
| i02_3584  | CDS  | 3593579 | 3594439 | +                | kbaY              | tagatose-bisphosphate aldolase                               |
| i02_3585  | CDS  | 3594606 | 3595082 | +                | agaB              | N-acetylgalactosamine-specific PTS system                    |
| i02_3586  | CDS  | 3595121 | 3595924 | +                | agaC              | N-acetylgalactosamine-specific PTS system                    |
| i02_3587  | CDS  | 3595833 | 3596705 | +                | agaD              | N-acetylgalactosamine-specific PTS system                    |
| i02_3588  | CDS  | 3596706 | 3597473 | +                | agal              | galactosamine-6-phosphate isomerase                          |
| i02_3589  | CDS  | 3597523 | 3598386 | -                | yraL              | hypothetical protein                                         |
| i02_3590  | CDS  | 3598326 | 3600488 | +                | yraM              | hypothetical protein                                         |
| i02_3591  | CDS  | 3600446 | 3600841 | +                | yraN              | hypothetical protein                                         |
| i02_3593  | CDS  | 3600861 | 3601451 | +                | yraO              | DnaA initiator-associating protein DiaA                      |

| Locus_tag | Type | start   | End     | +/- <sup>a</sup> | Gene <sup>b</sup> | Product                                                             |
|-----------|------|---------|---------|------------------|-------------------|---------------------------------------------------------------------|
| i02_3594  | CDS  | 3601461 | 3602036 | +                | yraP              | hypothetical protein                                                |
| i02_3595  | CDS  | 3602149 | 3603189 | -                | yraQ              | hypothetical protein                                                |
| i02_3596  | CDS  | 3603262 | 3603906 | -                | yraR              | hypothetical protein                                                |
| i02_3597  | CDS  | 3603939 | 3604361 | -                | yhbP              | hypothetical protein                                                |
| i02_3598  | CDS  | 3604412 | 3604714 | +                | yhbQ              | GIY-YIG nuclease superfamily protein                                |
| i02_3599  | CDS  | 3604701 | 3605204 | -                | yhbS              | acetyltransferase YhbS                                              |
| i02_3600  | CDS  | 3605198 | 3605746 | -                | yhbT              | hypothetical protein                                                |
| i02_3601  | CDS  | 3605904 | 3606926 | +                | yhbU              | putative protease yhbU precursor                                    |
| i02_3602  | CDS  | 3606917 | 3607813 | +                | yhbV              | hypothetical protein                                                |
| i02_3603  | CDS  | 3607894 | 3608901 | +                | yhbW              | hypothetical protein                                                |
| i02_3604  | CDS  | 3609020 | 3610264 | -                | mtr               | tryptophan permease                                                 |
| i02_3605  | CDS  | 3610280 | 3610417 | +                | /                 | hypothetical protein                                                |
| i02_3606  | CDS  | 3610418 | 3612358 | -                | deaD              | ATP-dependent RNA helicase DeaD                                     |
| i02_3607  | CDS  | 3612487 | 3613371 | -                | yhbM              | lipoprotein NlpI                                                    |
| i02_3608  | CDS  | 3613480 | 3615702 | -                | pnp               | polynucleotide phosphorylase/polyadenylase                          |
| i02_3609  | CDS  | 3615862 | 3616131 | -                | rpsO              | 30S ribosomal protein S15                                           |
| i02_3610  | CDS  | 3616280 | 3617224 | -                | truB              | tRNA pseudouridine synthase B                                       |
| i02_3611  | CDS  | 3617224 | 3617625 | -                | rbfA              | ribosome-binding factor A                                           |
| i02_3612  | CDS  | 3617789 | 3620461 | -                | infB              | translation initiation factor IF-2                                  |
| i02_3613  | CDS  | 3620318 | 3621787 | +                | /                 | hypothetical protein                                                |
| i02_3614  | CDS  | 3620486 | 3621973 | -                | nusA              | transcription elongation factor NusA                                |
| i02_3615  | CDS  | 3622001 | 3622453 | -                | yhbC              | hypothetical protein                                                |
| i02_3616  | CDS  | 3623084 | 3624427 | +                | argG              | argininosuccinate synthase                                          |
| i02_3617  | CDS  | 3624435 | 3626093 | -                | yhbX              | Outer-membrane protein yhbX precursor                               |
| i02_3618  | CDS  | 3626618 | 3626950 | -                | secG              | preprotein translocase subunit SecG                                 |
| i02_3619  | CDS  | 3627178 | 3628515 | -                | glmM              | phosphoglucosamine mutase                                           |
| i02_3620  | CDS  | 3628508 | 3629356 | -                | folP              | dihydropteroate synthase                                            |
| i02_3621  | CDS  | 3629446 | 3631380 | -                | hflB              | ATP-dependent metalloprotease                                       |
| i02_3622  | CDS  | 3631349 | 3631483 | +                | /                 | hypothetical protein                                                |
| i02_3623  | CDS  | 3631480 | 3632109 | -                | rrmJ              | 23S rRNA methyltransferase J                                        |
| i02_3624  | CDS  | 3632235 | 3632528 | +                | yhbY              | RNA-binding protein YhbY                                            |
| i02_3625  | CDS  | 3632684 | 3633160 | -                | greA              | transcription elongation factor GreA                                |
| i02_3626  | CDS  | 3633409 | 3634842 | +                | dacB              | D-alanyl-D-alanine                                                  |
| i02_3627  | CDS  | 3634883 | 3636055 | -                | obgE              | GTPase ObgE                                                         |
| i02_3628  | CDS  | 3636071 | 3637036 | -                | yhbE              | putative transport protein YhbE                                     |
| i02_3629  | CDS  | 3637163 | 3637420 | -                | rpmA              | 50S ribosomal protein L27                                           |
| i02_3630  | CDS  | 3637414 | 3637959 | +                | /                 | hypothetical protein                                                |
| i02_3631  | CDS  | 3638011 | 3638982 | +                | ispB              | octaprenyl diphosphate synthase                                     |
| i02_3632  | CDS  | 3639215 | 3639493 | +                | nlp               | DNA-binding transcriptional regulator Nlp                           |
| i02_3633  | CDS  | 3639541 | 3640800 | -                | murA              | UDP-N-acetylglucosamine                                             |
| i02_3634  | CDS  | 3640855 | 3641124 | -                | yrbA              | hypothetical protein                                                |
| i02_3635  | CDS  | 3641269 | 3641658 | -                | yrbB              | hypothetical protein                                                |
| i02_3636  | CDS  | 3641562 | 3642197 | -                | yrbC              | hypothetical protein                                                |
| i02_3637  | CDS  | 3642216 | 3642782 | -                | yrbD              | hypothetical protein                                                |
| i02_3638  | CDS  | 3642772 | 3643554 | -                | yrbE              | hypothetical protein                                                |
| i02_3639  | CDS  | 3643562 | 3644371 | -                | yrbF              | putative ABC transporter ATP-binding protein                        |
| i02_3640  | CDS  | 3644581 | 3645558 | +                | yrbG              | putative calcium/sodium:proton antiporter                           |
| i02_3641  | CDS  | 3645551 | 3646558 | +                | /                 | D-arabinose 5-phosphate isomerase                                   |
| i02_3642  | CDS  | 3646579 | 3647145 | +                | yrbI              | 3-deoxy-D-manno-octulosonate 8-phosphate phosphatase monomer (YrbI) |
| i02_3643  | CDS  | 3647142 | 3647717 | +                | yrbK              | hypothetical protein                                                |
| i02_3644  | CDS  | 3647665 | 3648243 | +                | yhbN              | lipopolysaccharide transport periplasmic protein                    |
| i02_3645  | CDS  | 3648250 | 3648975 | +                | yhbG              | putative ABC transporter ATP-binding protein                        |
| i02_3646  | CDS  | 3649023 | 3650456 | +                | rpoN              | RNA polymerase factor sigma-54                                      |
| i02_3647  | CDS  | 3650479 | 3650766 | +                | yhbH              | putative sigma(54) modulation protein                               |
| i02_3648  | CDS  | 3650860 | 3651375 | +                | ptsN              | PTS IIA-like nitrogen-regulatory protein PtsN                       |
| i02_3649  | CDS  | 3651421 | 3652275 | +                | yhbJ              | hypothetical protein                                                |
| i02_3650  | CDS  | 3652272 | 3652544 | +                | ptsO              | phosphohistidinoprotein-hexose                                      |

| Locus_tag | Type | start   | End     | +/- <sup>a</sup> | Gene <sup>b</sup> | Product                                         |
|-----------|------|---------|---------|------------------|-------------------|-------------------------------------------------|
| i02_3651  | CDS  | 3652757 | 3653389 | +                | yrbL              | hypothetical protein                            |
| i02_3652  | CDS  | 3653386 | 3654114 | -                | mtgA              | monofunctional biosynthetic peptidoglycan       |
| i02_3653  | CDS  | 3654111 | 3654764 | -                | yhbL              | isoprenoid biosynthesis protein                 |
| i02_3654  | CDS  | 3654994 | 3657330 | -                | arcB              | aerobic respiration control sensor protein ArcB |
| i02_3655  | CDS  | 3657426 | 3658355 | -                | yhcC              | hypothetical protein                            |
| i02_3656  | CDS  | 3658620 | 3658757 | -                | /                 | hypothetical protein                            |
| i02_3657  | CDS  | 3658922 | 3663490 | +                | gltB              | glutamate synthase subunit alpha                |
| i02_3658  | CDS  | 3663503 | 3664921 | +                | gltD              | glutamate synthase subunit beta                 |
| i02_3659  | CDS  | 3664989 | 3665453 | -                | yhcH              | hypothetical protein                            |
| i02_3660  | CDS  | 3665450 | 3666325 | -                | /                 | N-acetylmannosamine kinase                      |
| i02_3661  | CDS  | 3666322 | 3667053 | -                | yhcJ              | N-acetylmannosamine-6-phosphate 2-epimerase     |
| i02_3662  | CDS  | 3667059 | 3668579 | -                | nanT              | putative sialic acid transporter                |
| i02_3663  | CDS  | 3668658 | 3669551 | -                | nanA              | N-acetylneuraminate lyase                       |
| i02_3664  | CDS  | 3669673 | 3670464 | -                | yhcK              | transcriptional regulator NanR                  |
| i02_3665  | CDS  | 3670572 | 3671069 | -                | sspB              | ClpXP protease specificity-enhancing factor     |
| i02_3666  | CDS  | 3671075 | 3671713 | -                | sspA              | stringent starvation protein A                  |
| i02_3667  | CDS  | 3671655 | 3671864 | +                | /                 | hypothetical protein                            |
| i02_3668  | CDS  | 3672108 | 3672500 | -                | rpsI              | 30S ribosomal protein S9                        |
| i02_3669  | CDS  | 3672516 | 3672944 | -                | rplM              | 50S ribosomal protein L13                       |
| i02_3670  | CDS  | 3673164 | 3674291 | -                | yhcM              | hypothetical protein                            |
| i02_3671  | CDS  | 3674479 | 3674883 | +                | yhcB              | cytochrome d ubiquinol oxidase subunit III      |
| i02_3672  | CDS  | 3674995 | 3676404 | +                | degQ              | serine endoprotease                             |
| i02_3673  | CDS  | 3676494 | 3677561 | +                | degS              | serine endoprotease                             |
| i02_3674  | CDS  | 3677624 | 3678562 | -                | mdh               | malate dehydrogenase                            |
| i02_3675  | CDS  | 3678997 | 3679467 | +                | argR              | arginine repressor                              |
| i02_3676  | CDS  | 3679780 | 3680094 | +                | yhcN              | hypothetical protein                            |
| i02_3677  | CDS  | 3680149 | 3680421 | -                | yhcO              | hypothetical protein                            |
| i02_3678  | CDS  | 3680513 | 3682480 | -                | yhcP              | p-hydroxybenzoic acid efflux subunit AaeB       |
| i02_3679  | CDS  | 3682486 | 3683418 | -                | yhcQ              | p-hydroxybenzoic acid efflux subunit AaeA       |
| i02_3680  | CDS  | 3683426 | 3683629 | -                | yhcR              | hypothetical protein                            |
| i02_3681  | CDS  | 3683812 | 3684741 | +                | yhcS              | putative DNA-binding transcriptional regulator  |
| i02_3682  | CDS  | 3684869 | 3686314 | -                | tldD              | protease TldD                                   |
| i02_3683  | CDS  | 3686470 | 3690270 | -                | yhdP              | hypothetical protein                            |
| i02_3684  | CDS  | 3690338 | 3691807 | -                | cafA              | ribonuclease G                                  |
| i02_3685  | CDS  | 3691797 | 3692390 | -                | maf               | Maf-like protein                                |
| i02_3686  | CDS  | 3692399 | 3692887 | -                | mreD              | rod shape-determining protein MreD              |
| i02_3687  | CDS  | 3692887 | 3693990 | -                | mreC              | rod shape-determining protein MreC              |
| i02_3688  | CDS  | 3694056 | 3695099 | -                | mreB              | rod shape-determining protein MreB              |
| i02_3689  | CDS  | 3695207 | 3695395 | +                | /                 | hypothetical protein                            |
| i02_3690  | CDS  | 3695404 | 3697344 | -                | yhdA              | regulatory protein CsrD                         |
| i02_3691  | CDS  | 3697496 | 3698470 | +                | yhdH              | hypothetical protein                            |
| i02_3692  | CDS  | 3698507 | 3698671 | +                | /                 | hypothetical protein                            |
| i02_3693  | CDS  | 3699448 | 3699918 | +                | accB              | acetyl-CoA carboxylase biotin carboxyl carrier  |
| i02_3694  | CDS  | 3699929 | 3701278 | +                | accC              | acetyl-CoA carboxylase biotin carboxylase       |
| i02_3695  | CDS  | 3701370 | 3702416 | -                | /                 | hypothetical protein                            |
| i02_3696  | CDS  | 3702413 | 3703375 | -                | /                 | hypothetical protein                            |
| i02_3697  | CDS  | 3703397 | 3704386 | -                | /                 | ribose ABC transporter permease                 |
| i02_3698  | CDS  | 3704387 | 3705916 | -                | /                 | ribose ABC transporter ATP-binding protein      |
| i02_3699  | CDS  | 3705947 | 3706843 | -                | /                 | putative ribose ABC transporter                 |
| i02_3700  | CDS  | 3706873 | 3707727 | -                | gatY              | tagatose-bisphosphate aldolase                  |
| i02_3701  | CDS  | 3707702 | 3707830 | +                | /                 | hypothetical protein                            |
| i02_3702  | CDS  | 3708069 | 3708899 | +                | /                 | hypothetical protein                            |
| i02_3703  | CDS  | 3708856 | 3709866 | +                | /                 | hypothetical protein                            |
| i02_3704  | CDS  | 3709941 | 3710201 | +                | yhdT              | hypothetical protein                            |
| i02_3705  | CDS  | 3710185 | 3711642 | +                | panF              | sodium/panthothenate symporter                  |
| i02_3706  | CDS  | 3711654 | 3712535 | +                | prmA              | ribosomal protein L11 methyltransferase         |
| i02_3707  | CDS  | 3712516 | 3712644 | -                | /                 | hypothetical protein                            |
| i02_3708  | CDS  | 3712864 | 3713829 | +                | yhdG              | tRNA-dihydrouridine synthase B                  |



| <b>Locus_tag</b> | <b>Type</b> | <b>start</b> | <b>End</b> | <b>+/-<sup>a</sup></b> | <b>Gene<sup>b</sup></b> | <b>Product</b>                                 |
|------------------|-------------|--------------|------------|------------------------|-------------------------|------------------------------------------------|
| i02_3709         | CDS         | 3713855      | 3714151    | +                      | fis                     | DNA-binding protein Fis                        |
| i02_3710         | CDS         | 3714237      | 3715121    | +                      | yhdJ                    | putative methyltransferase                     |
| i02_3711         | CDS         | 3715178      | 3715384    | +                      | yhdU                    | hypothetical protein                           |
| i02_3712         | CDS         | 3715387      | 3716049    | -                      | envR                    | DNA-binding transcriptional regulator EnvR     |
| i02_3713         | CDS         | 3716448      | 3717605    | +                      | acrE                    | acriflavin resistance protein E                |
| i02_3714         | CDS         | 3717617      | 3720721    | +                      | acrF                    | acriflavin resistance protein F                |
| i02_3715         | CDS         | 3720974      | 3721195    | +                      | yhdV                    | hypothetical protein                           |
| i02_3716         | CDS         | 3721431      | 3721550    | +                      | /                       | hypothetical protein                           |
| i02_3717         | CDS         | 3721626      | 3722651    | +                      | yhdW                    | putative amino-acid ABC transporter            |
| i02_3718         | CDS         | 3722701      | 3723900    | +                      | yhdX                    | amino-acid ABC transporter permease protein    |
| i02_3719         | CDS         | 3723907      | 3725013    | +                      | yhdY                    | amino-acid ABC transporter permease protein    |
| i02_3720         | CDS         | 3725021      | 3725779    | +                      | yhdZ                    | amino-acid ABC transporter ATP-binding protein |
| i02_3722         | CDS         | 3731367      | 3732215    | +                      | yrdA                    | hypothetical protein                           |
| i02_3723         | CDS         | 3732191      | 3732448    | -                      | yrdB                    | hypothetical protein                           |
| i02_3724         | CDS         | 3732445      | 3733263    | -                      | aroE                    | shikimate 5-dehydrogenase                      |
| i02_3725         | CDS         | 3733268      | 3733885    | -                      | yrdC                    | putative ribosome maturation factor            |
| i02_3726         | CDS         | 3733845      | 3734387    | -                      | yrdD                    | hypothetical protein                           |
| i02_3727         | CDS         | 3734416      | 3734889    | -                      | smg                     | hypothetical protein                           |
| i02_3728         | CDS         | 3734861      | 3735985    | -                      | smf                     | DNA protecting protein DprA                    |
| i02_3729         | CDS         | 3736115      | 3736624    | +                      | def                     | peptide deformylase                            |
| i02_3730         | CDS         | 3736639      | 3737586    | +                      | fnt                     | methionyl-tRNA formyltransferase               |
| i02_3731         | CDS         | 3737638      | 3738927    | +                      | sun                     | 16S rRNA methyltransferase B                   |
| i02_3732         | CDS         | 3738949      | 3740325    | +                      | trkA                    | potassium transporter                          |
| i02_3733         | CDS         | 3740455      | 3740868    | +                      | mscL                    | large-conductance mechanosensitive channel     |
| i02_3734         | CDS         | 3740865      | 3741083    | -                      | yhdL                    | putative regulator                             |
| i02_3735         | CDS         | 3741139      | 3741564    | -                      | zntR                    | zinc-responsive transcriptional regulator      |
| i02_3736         | CDS         | 3741575      | 3741943    | -                      | yhdN                    | hypothetical protein                           |
| i02_3737         | CDS         | 3742050      | 3742433    | -                      | rplQ                    | 50S ribosomal protein L17                      |
| i02_3738         | CDS         | 3742474      | 3743463    | -                      | rpoA                    | DNA-directed RNA polymerase subunit alpha      |
| i02_3739         | CDS         | 3743489      | 3744109    | -                      | rpsD                    | 30S ribosomal protein S4                       |
| i02_3740         | CDS         | 3744143      | 3744532    | -                      | rpsK                    | 30S ribosomal protein S11                      |
| i02_3741         | CDS         | 3744549      | 3744905    | -                      | rpsM                    | 30S ribosomal protein S13                      |
| i02_3742         | CDS         | 3745052      | 3745168    | -                      | /                       | predicted protein                              |
| i02_3743         | CDS         | 3745200      | 3746531    | -                      | secY                    | preprotein translocase subunit SecY            |
| i02_3744         | CDS         | 3746539      | 3746973    | -                      | rplO                    | 50S ribosomal protein L15                      |
| i02_3745         | CDS         | 3746977      | 3747156    | -                      | rpmD                    | 50S ribosomal protein L30                      |
| i02_3746         | CDS         | 3747160      | 3747663    | -                      | rpsE                    | 30S ribosomal protein S5                       |
| i02_3747         | CDS         | 3747678      | 3748031    | -                      | rplR                    | 50S ribosomal protein L18                      |
| i02_3748         | CDS         | 3748041      | 3748574    | -                      | rplF                    | 50S ribosomal protein L6                       |
| i02_3750         | CDS         | 3748587      | 3748979    | -                      | rpsH                    | 30S ribosomal protein S8                       |
| i02_3751         | CDS         | 3749013      | 3749318    | -                      | rpsN                    | 30S ribosomal protein S14                      |
| i02_3752         | CDS         | 3749333      | 3749872    | -                      | rplE                    | 50S ribosomal protein L5                       |
| i02_3753         | CDS         | 3749887      | 3750201    | -                      | rplX                    | 50S ribosomal protein L24                      |
| i02_3755         | CDS         | 3750212      | 3750583    | -                      | rplN                    | 50S ribosomal protein L14                      |
| i02_3756         | CDS         | 3750748      | 3751002    | -                      | rpsQ                    | 30S ribosomal protein S17                      |
| i02_3757         | CDS         | 3751002      | 3751193    | -                      | rpmC                    | 50S ribosomal protein L29                      |
| i02_3758         | CDS         | 3751193      | 3751603    | -                      | rplP                    | 50S ribosomal protein L16                      |
| i02_3759         | CDS         | 3751616      | 3752317    | -                      | rpsC                    | 30S ribosomal protein S3                       |
| i02_3760         | CDS         | 3752335      | 3752661    | -                      | rplV                    | 50S ribosomal protein L22                      |
| i02_3761         | CDS         | 3752682      | 3752960    | -                      | rpsS                    | 30S ribosomal protein S19                      |
| i02_3762         | CDS         | 3752977      | 3753798    | -                      | rplB                    | 50S ribosomal protein L2                       |
| i02_3763         | CDS         | 3753816      | 3754118    | -                      | rplW                    | 50S ribosomal protein L23                      |
| i02_3764         | CDS         | 3754115      | 3754720    | -                      | rplD                    | 50S ribosomal protein L4                       |
| i02_3765         | CDS         | 3754731      | 3755360    | -                      | rplC                    | 50S ribosomal protein L3                       |
| i02_3766         | CDS         | 3755393      | 3755704    | -                      | rpsJ                    | 30S ribosomal protein S10                      |
| i02_3767         | CDS         | 3755942      | 3756364    | -                      | pinO                    | chromosome replication protein PioO            |
| i02_3768         | CDS         | 3756366      | 3757835    | -                      | yheD                    | general secretion pathway protein A            |
| i02_3769         | CDS         | 3758015      | 3758830    | +                      | yheE                    | general secretion pathway protein C            |

| Locus_tag | Type | start   | End     | +/- <sup>a</sup> | Gene <sup>b</sup> | Product                                       |
|-----------|------|---------|---------|------------------|-------------------|-----------------------------------------------|
| i02_3770  | CDS  | 3758802 | 3760766 | +                | yheF              | general secretion pathway protein D precursor |
| i02_3771  | CDS  | 3760776 | 3762257 | +                | yheG              | general secretion pathway protein E           |
| i02_3772  | CDS  | 3762254 | 3763450 | +                | hofF              | putative general secretion pathway protein F  |
| i02_3773  | CDS  | 3763460 | 3763897 | +                | hofG              | putative general secretion pathway protein G  |
| i02_3774  | CDS  | 3763905 | 3764414 | +                | hofH              | putative general secretion pathway protein H  |
| i02_3775  | CDS  | 3764372 | 3764788 | +                | yheH              | general secretion pathway protein I precursor |
| i02_3776  | CDS  | 3764781 | 3765368 | +                | yheI              | general secretion pathway protein J precursor |
| i02_3777  | CDS  | 3765361 | 3766266 | +                | yheJ              | general secretion pathway protein K           |
| i02_3778  | CDS  | 3766356 | 3767522 | +                | yheK              | general secretion pathway protein L           |
| i02_3779  | CDS  | 3767495 | 3767980 | +                | pshM              | putative general secretion pathway protein M  |
| i02_3780  | CDS  | 3767980 | 3768657 | +                | hofD              | leader peptidase                              |
| i02_3781  | CDS  | 3768686 | 3769162 | -                | bfr               | bacterioferritin                              |
| i02_3782  | CDS  | 3769234 | 3769428 | -                | yheA              | bacterioferritin-associated ferredoxin        |
| i02_3783  | CDS  | 3769478 | 3769594 | -                | /                 | hypothetical protein                          |
| i02_3784  | CDS  | 3769597 | 3772299 | -                | chiA              | secreted endochitinase                        |
| i02_3785  | CDS  | 3772384 | 3772542 | -                | /                 | hypothetical protein                          |
| i02_3785a | CDS  | 3772591 | 3773775 | -                | tuf               | elongation factor Tu                          |
| i02_3786  | CDS  | 3773846 | 3775960 | -                | fusA              | elongation factor G                           |
| i02_3787  | CDS  | 3776057 | 3776527 | -                | rpsG              | 30S ribosomal protein S7                      |
| i02_3788  | CDS  | 3776624 | 3776998 | -                | rpsL              | 30S ribosomal protein S12                     |
| i02_3789  | CDS  | 3777124 | 3777411 | -                | yheL              | sulfur transfer complex subunit TusB          |
| i02_3790  | CDS  | 3777419 | 3777778 | -                | yheM              | sulfur relay protein TusC                     |
| i02_3791  | CDS  | 3777778 | 3778164 | -                | yheN              | sulfur transfer complex subunit TusD          |
| i02_3792  | CDS  | 3778164 | 3778898 | -                | yheO              | hypothetical protein                          |
| i02_3793  | CDS  | 3779053 | 3779865 | -                | fkpA              | FKBP-type peptidyl-prolyl cis-trans isomerase |
| i02_3794  | CDS  | 3780086 | 3780304 | +                | slyX              | hypothetical protein                          |
| i02_3795  | CDS  | 3780353 | 3780943 | -                | slyD              | FKBP-type peptidyl-prolyl cis-trans isomerase |
| i02_3796  | CDS  | 3781038 | 3781238 | -                | /                 | hypothetical protein                          |
| i02_3797  | CDS  | 3781248 | 3783053 | -                | kefB              | glutathione-regulated potassium-efflux system |
| i02_3798  | CDS  | 3783053 | 3783607 | -                | yheR              | glutathione-regulated potassium-efflux system |
| i02_3799  | CDS  | 3783735 | 3785648 | +                | yheS              | putative ABC transporter ATP-binding protein  |
| i02_3800  | CDS  | 3785648 | 3786670 | +                | yheT              | putative hydrolase                            |
| i02_3801  | CDS  | 3786664 | 3786882 | +                | yheU              | hypothetical protein                          |
| i02_3802  | CDS  | 3786936 | 3787805 | +                | prkB              | phosphoribulokinase                           |
| i02_3803  | CDS  | 3787860 | 3788264 | -                | yhfA              | hypothetical protein                          |
| i02_3804  | CDS  | 3788566 | 3789198 | +                | crp               | cAMP-regulatory protein                       |
| i02_3805  | CDS  | 3789237 | 3791339 | +                | yhfK              | hypothetical protein                          |
| i02_3806  | CDS  | 3791406 | 3792626 | -                | argD              | bifunctional                                  |
| i02_3807  | CDS  | 3792712 | 3793275 | -                | pabA              | para-aminobenzoate synthase component II      |
| i02_3808  | CDS  | 3793307 | 3793909 | -                | fic               | cell filamentation protein Fic                |
| i02_3809  | CDS  | 3793899 | 3794066 | -                | yhfG              | hypothetical protein                          |
| i02_3810  | CDS  | 3794171 | 3794743 | -                | ppiA              | peptidyl-prolyl cis-trans isomerase A         |
| i02_3811  | CDS  | 3795014 | 3796195 | +                | yhfC              | hypothetical protein                          |
| i02_3812  | CDS  | 3796328 | 3796504 | -                | /                 | hypothetical protein                          |
| i02_3813  | CDS  | 3796457 | 3799000 | +                | nirB              | nitrite reductase [NAD(P)H] large subunit     |
| i02_3814  | CDS  | 3798997 | 3799323 | +                | nirD              | nitrite reductase small subunit               |
| i02_3815  | CDS  | 3799449 | 3800255 | +                | nirC              | nitrite transporter NirC                      |
| i02_3816  | CDS  | 3800274 | 3801647 | +                | cysG              | siroheme synthase                             |
| i02_3817  | CDS  | 3801899 | 3802066 | +                | yhfL              | hypothetical protein                          |
| i02_3818  | CDS  | 3802174 | 3803259 | -                | yhfS              | hypothetical protein                          |
| i02_3819  | CDS  | 3803271 | 3804575 | -                | yhfT              | hypothetical protein                          |
| i02_3820  | CDS  | 3804587 | 3804979 | -                | yhfU              | hypothetical protein                          |
| i02_3821  | CDS  | 3804951 | 3805829 | -                | yhfV              | putative hydrolase                            |
| i02_3822  | CDS  | 3805826 | 3807052 | -                | yhfW              | putative mutase                               |
| i02_3823  | CDS  | 3807053 | 3808216 | -                | yhfX              | hypothetical protein                          |
| i02_3824  | CDS  | 3808300 | 3808704 | -                | yhfY              | hypothetical protein                          |
| i02_3825  | CDS  | 3808679 | 3809584 | -                | yhfZ              | hypothetical protein                          |
| i02_3826  | CDS  | 3809744 | 3810748 | -                | trpS              | tryptophanyl-tRNA synthetase                  |

| <b>Locus_tag</b> | <b>Type</b> | <b>start</b> | <b>End</b> | <b>+/-<sup>a</sup></b> | <b>Gene<sup>b</sup></b> | <b>Product</b>                               |
|------------------|-------------|--------------|------------|------------------------|-------------------------|----------------------------------------------|
| i02_3827         | CDS         | 3810741      | 3811499    | -                      | gph                     | phosphoglycolate phosphatase                 |
| i02_3828         | CDS         | 3811492      | 3812169    | -                      | rpe                     | ribulose-phosphate 3-epimerase               |
| i02_3829         | CDS         | 3812187      | 3813023    | -                      | dam                     | DNA adenine methylase                        |
| i02_3830         | CDS         | 3813130      | 3814416    | -                      | damX                    | hypothetical protein                         |
| i02_3831         | CDS         | 3814508      | 3815596    | -                      | aroB                    | 3-dehydroquinate synthase                    |
| i02_3832         | CDS         | 3815653      | 3816174    | -                      | aroK                    | shikimate kinase I                           |
| i02_3833         | CDS         | 3816575      | 3817813    | -                      | hofQ                    | outer membrane porin HofQ                    |
| i02_3834         | CDS         | 3817725      | 3818168    | -                      | yrfA                    | hypothetical protein                         |
| i02_3835         | CDS         | 3818119      | 3818559    | -                      | yrfB                    | hypothetical protein                         |
| i02_3836         | CDS         | 3818543      | 3819082    | -                      | yrfC                    | hypothetical protein                         |
| i02_3837         | CDS         | 3819082      | 3819888    | -                      | yrfD                    | hypothetical protein                         |
| i02_3838         | CDS         | 3819981      | 3822533    | +                      | mrcA                    | peptidoglycan synthetase                     |
| i02_3839         | CDS         | 3822699      | 3823259    | -                      | nudE                    | ADP-ribose diphosphatase NudE                |
| i02_3840         | CDS         | 3823460      | 3823582    | +                      | /                       | hypothetical protein                         |
| i02_3841         | CDS         | 3823579      | 3825714    | +                      | yrfF                    | putative membrane protein igaA-like protein  |
| i02_3842         | CDS         | 3825734      | 3826447    | +                      | yrfG                    | hypothetical protein                         |
| i02_3843         | CDS         | 3826458      | 3826859    | +                      | yrfH                    | ribosome-associated heat shock protein Hsp15 |
| i02_3844         | CDS         | 3826878      | 3827762    | +                      | hslO                    | Hsp33-like chaperonin                        |
| i02_3845         | CDS         | 3827900      | 3829624    | -                      | yhgE                    | hypothetical protein                         |
| i02_3846         | CDS         | 3829700      | 3829831    | -                      | /                       | hypothetical protein                         |
| i02_3847         | CDS         | 3829934      | 3831625    | +                      | pckA                    | phosphoenolpyruvate carboxykinase            |
| i02_3848         | CDS         | 3831748      | 3831927    | +                      | /                       | hypothetical protein                         |
| i02_3849         | CDS         | 3831900      | 3832052    | +                      | /                       | hypothetical protein                         |
| i02_3850         | CDS         | 3832111      | 3832407    | +                      | /                       | hypothetical protein                         |
| i02_3851         | CDS         | 3832438      | 3833790    | -                      | envZ                    | osmolarity sensor protein                    |
| i02_3852         | CDS         | 3833787      | 3834506    | -                      | ompR                    | osmolarity response regulator                |
| i02_3853         | CDS         | 3834596      | 3834781    | -                      | /                       | hypothetical protein                         |
| i02_3854         | CDS         | 3834734      | 3835210    | +                      | greB                    | transcription elongation factor GreB         |
| i02_3855         | CDS         | 3835307      | 3837628    | +                      | yhgF                    | hypothetical protein                         |
| i02_3856         | CDS         | 3838084      | 3838311    | +                      | feoA                    | ferrous iron transport protein A             |
| i02_3857         | CDS         | 3838316      | 3840649    | +                      | feoB                    | ferrous iron transport protein B             |
| i02_3858         | CDS         | 3840640      | 3840885    | +                      | yhgG                    | hypothetical protein                         |
| i02_3859         | CDS         | 3841118      | 3841711    | +                      | yhgA                    | hypothetical protein                         |
| i02_3860         | CDS         | 3841740      | 3842510    | -                      | bioH                    | carboxylesterase BioH                        |
| i02_3861         | CDS         | 3842500      | 3843231    | +                      | yhgH                    | gluconate periplasmic binding protein        |
| i02_3862         | CDS         | 3843290      | 3843865    | +                      | yhgI                    | putative DNA uptake protein                  |
| i02_3863         | CDS         | 3844229      | 3845545    | +                      | gntT                    | high-affinity gluconate transporter          |
| i02_3864         | CDS         | 3845656      | 3847740    | -                      | malQ                    | 4-alpha-glucanotransferase                   |
| i02_3865         | CDS         | 3847750      | 3850143    | -                      | malP                    | maltodextrin phosphorylase                   |
| i02_3866         | CDS         | 3850488      | 3850634    | -                      | /                       | hypothetical protein                         |
| i02_3867         | CDS         | 3850766      | 3853471    | +                      | malT                    | transcriptional regulator MalT               |
| i02_3868         | CDS         | 3853514      | 3854533    | -                      | /                       | RNA 3'-terminal-phosphate cyclase            |
| i02_3869         | CDS         | 3854534      | 3855823    | -                      | rtcB                    | protein rtcB                                 |
| i02_3870         | CDS         | 3855949      | 3857547    | +                      | rtcR                    | transcriptional regulatory protein rtcR      |
| i02_3872         | CDS         | 3857529      | 3858338    | -                      | glpR                    | DNA-binding transcriptional repressor GlpR   |
| i02_3873         | CDS         | 3858304      | 3859134    | -                      | glpG                    | intramembrane serine protease GlpG           |
| i02_3874         | CDS         | 3859179      | 3859505    | -                      | glpE                    | thiosulfate sulfurtransferase                |
| i02_3875         | CDS         | 3859695      | 3861200    | +                      | glpD                    | glycerol-3-phosphate dehydrogenase           |
| i02_3876         | CDS         | 3861254      | 3861859    | -                      | /                       | hypothetical protein                         |
| i02_3877         | CDS         | 3861862      | 3862629    | -                      | /                       | hypothetical protein                         |
| i02_3878         | CDS         | 3862632      | 3863342    | -                      | /                       | hypothetical protein                         |
| i02_3879         | CDS         | 3863516      | 3864646    | -                      | /                       | putative fimbrial adhesin precursor          |
| i02_3880         | CDS         | 3864665      | 3865462    | -                      | /                       | putative fimbrial chaperone precursor        |
| i02_3881         | CDS         | 3865407      | 3865985    | -                      | /                       | putative minor fimbrial subunit precursor    |
| i02_3882         | CDS         | 3865930      | 3866502    | -                      | /                       | putative minor fimbrial subunit precursor    |
| i02_3883         | CDS         | 3866493      | 3869087    | -                      | ycbS                    | outer membrane usher protein ycbS precursor  |
| i02_3884         | CDS         | 3869124      | 3869903    | -                      | /                       | chaperone protein fimC precursor             |
| i02_3885         | CDS         | 3869977      | 3870681    | -                      | /                       | putative major fimbrial subunit precursor    |

| <b>Locus_tag</b> | <b>Type</b> | <b>start</b> | <b>End</b> | <b>+/-<sup>a</sup></b> | <b>Gene<sup>b</sup></b> | <b>Product</b>                                         |
|------------------|-------------|--------------|------------|------------------------|-------------------------|--------------------------------------------------------|
| i02_3886         | CDS         | 3871176      | 3873623    | -                      | glgP                    | glycogen phosphorylase                                 |
| i02_3887         | CDS         | 3873642      | 3875075    | -                      | glgA                    | glycogen synthase                                      |
| i02_3888         | CDS         | 3875075      | 3876406    | -                      | glgC                    | glucose-1-phosphate adenylyltransferase                |
| i02_3889         | CDS         | 3876388      | 3878361    | -                      | glgX                    | glycogen debranching enzyme                            |
| i02_3890         | CDS         | 3878358      | 3880544    | -                      | glgB                    | glycogen branching enzyme                              |
| i02_3891         | CDS         | 3880817      | 3881980    | -                      | asd                     | aspartate-semialdehyde dehydrogenase                   |
| i02_3892         | CDS         | 3882112      | 3882705    | +                      | yhgN                    | putative dITP- and XTP- hydrolase                      |
| i02_3893         | CDS         | 3882751      | 3884046    | -                      | /                       | putative DNA processing protein                        |
| i02_3894         | CDS         | 3883953      | 3886052    | -                      | /                       | hypothetical protein                                   |
| i02_3895         | CDS         | 3886190      | 3887503    | -                      | gntU                    | low affinity gluconate transporter                     |
| i02_3896         | CDS         | 3887534      | 3888061    | -                      | gntK                    | gluconate kinase 1                                     |
| i02_3897         | CDS         | 3888200      | 3889195    | -                      | gntR                    | gluconate utilization system GNT-I                     |
| i02_3898         | CDS         | 3889288      | 3889983    | -                      | yhhW                    | hypothetical protein                                   |
| i02_3899         | CDS         | 3890106      | 3891143    | -                      | yhhX                    | putative dehydrogenase                                 |
| i02_3900         | CDS         | 3891090      | 3891248    | +                      | /                       | hypothetical protein                                   |
| i02_3901         | CDS         | 3891200      | 3891436    | -                      | /                       | hypothetical protein                                   |
| i02_3902         | pseudo      | 3891477      | 3891965    | +                      | yhhY                    | putative acetyltransferase YhhY                        |
| i02_3903         | CDS         | 3892201      | 3893379    | +                      | yhhZ                    | hypothetical protein                                   |
| i02_3904         | CDS         | 3893376      | 3893870    | +                      | yrhA                    | hypothetical protein                                   |
| i02_3905         | CDS         | 3894326      | 3894604    | +                      | yrhB                    | hypothetical protein                                   |
| i02_3906         | CDS         | 3894642      | 3896375    | -                      | ggt                     | gamma-glutamyltranspeptidase                           |
| i02_3907         | CDS         | 3896495      | 3896935    | +                      | yhhA                    | hypothetical protein                                   |
| i02_3908         | CDS         | 3896922      | 3897665    | -                      | ugpQ                    | cytoplasmic glycerophosphodiester                      |
| i02_3909         | CDS         | 3897662      | 3898732    | -                      | ugpC                    | glycerol-3-phosphate transporter ATP-binding component |
| i02_3910         | CDS         | 3898734      | 3899579    | -                      | ugpE                    | glycerol-3-phosphate transporter membrane component    |
| i02_3911         | CDS         | 3899576      | 3900463    | -                      | ugpA                    | glycerol-3-phosphate transporter permease component    |
| i02_3912         | CDS         | 3900561      | 3901877    | -                      | ugpB                    | glycerol-3-phosphate transporter periplasmic component |
| i02_3913         | CDS         | 3902154      | 3902285    | +                      | /                       | hypothetical protein                                   |
| i02_3914         | CDS         | 3902274      | 3902999    | -                      | livF                    | leucine/isoleucine/valine transporter                  |
| i02_3915         | CDS         | 3902989      | 3903756    | -                      | livG                    | leucine/isoleucine/valine transporter                  |
| i02_3916         | CDS         | 3903753      | 3905030    | -                      | livM                    | leucine/isoleucine/valine transporter permease         |
| i02_3917         | CDS         | 3905027      | 3905953    | -                      | livH                    | branched-chain amino acid transporter permease         |
| i02_3918         | CDS         | 3906001      | 3907164    | -                      | livK                    | leucine-specific binding protein precursor             |
| i02_3919         | CDS         | 3907137      | 3907283    | +                      | /                       | hypothetical protein                                   |
| i02_3920         | CDS         | 3907262      | 3907399    | -                      | /                       | hypothetical protein                                   |
| i02_3921         | CDS         | 3907534      | 3907917    | +                      | yhhK                    | hypothetical protein                                   |
| i02_3922         | CDS         | 3907927      | 3908049    | +                      | /                       | hypothetical protein                                   |
| i02_3923         | CDS         | 3908105      | 3909265    | -                      | livJ                    | Leu/Ile/Val-binding protein precursor                  |
| i02_3924         | CDS         | 3909479      | 3910333    | -                      | rpoH                    | RNA polymerase factor sigma-32                         |
| i02_3925         | CDS         | 3910578      | 3911663    | -                      | ftsX                    | cell division protein FtsX                             |
| i02_3926         | CDS         | 3911629      | 3912297    | -                      | ftsE                    | cell division protein FtsE                             |
| i02_3927         | CDS         | 3912300      | 3913790    | -                      | ftsY                    | cell division protein FtsY                             |
| i02_3928         | CDS         | 3913940      | 3914536    | +                      | rsmD                    | 16S rRNA m(2)G966-methyltransferase                    |
| i02_3929         | CDS         | 3914523      | 3914795    | +                      | yhhL                    | hypothetical protein                                   |
| i02_3930         | CDS         | 3914798      | 3915157    | -                      | yhhM                    | hypothetical protein                                   |
| i02_3931         | CDS         | 3915298      | 3915924    | +                      | yhhN                    | hypothetical protein                                   |
| i02_3932         | CDS         | 3915998      | 3918196    | +                      | zntA                    | zinc/cadmium/mercury/lead-transporting ATPase          |
| i02_3933         | CDS         | 3918457      | 3918702    | -                      | yhhP                    | sulfur transfer protein SirA                           |
| i02_3934         | CDS         | 3918923      | 3919588    | +                      | yhhQ                    | hypothetical protein                                   |
| i02_3935         | CDS         | 3919619      | 3920218    | +                      | /                       | hypothetical protein                                   |
| i02_3936         | CDS         | 3920222      | 3921439    | -                      | yhhS                    | major facilitator superfamily transporter              |
| i02_3937         | CDS         | 3921490      | 3922620    | +                      | yhhT                    | hypothetical protein                                   |
| i02_3938         | CDS         | 3922675      | 3923262    | +                      | yhhU                    | holo-(acyl carrier protein) synthase 2                 |
| i02_3939         | CDS         | 3923373      | 3924947    | +                      | nikA                    | nickel-binding periplasmic protein precursor           |

| <b>Locus_tag</b> | <b>Type</b> | <b>start</b> | <b>End</b> | <b>+/-<sup>a</sup></b> | <b>Gene<sup>b</sup></b> | <b>Product</b>                                |
|------------------|-------------|--------------|------------|------------------------|-------------------------|-----------------------------------------------|
| i02_3940         | CDS         | 3924947      | 3925891    | +                      | nikB                    | nickel transporter permease NikB              |
| i02_3941         | CDS         | 3925888      | 3926721    | +                      | nikC                    | nickel transporter permease NikC              |
| i02_3942         | CDS         | 3926721      | 3927485    | +                      | nikD                    | nickel transporter ATP-binding protein NikD   |
| i02_3943         | CDS         | 3927482      | 3928288    | +                      | nikE                    | nickel transporter ATP-binding protein NikE   |
| i02_3944         | CDS         | 3928294      | 3928695    | +                      | yhhG                    | nickel responsive regulator                   |
| i02_3946         | CDS         | 3928885      | 3929640    | +                      | /                       | putative regulator                            |
| i02_3947         | CDS         | 3929653      | 3930138    | +                      | /                       | putative phosphotransferase system enzyme     |
| i02_3948         | CDS         | 3930135      | 3930416    | +                      | /                       | putative phosphotransferase system enzyme     |
| i02_3949         | CDS         | 3930463      | 3931851    | +                      | /                       | PTS system, galactitol-specific IIC component |
| i02_3950         | CDS         | 3931844      | 3933352    | +                      | /                       | putative xylulose kinase                      |
| i02_3951         | CDS         | 3933204      | 3933566    | -                      | /                       | hypothetical protein                          |
| i02_3952         | CDS         | 3933342      | 3933611    | +                      | /                       | putative phosphocarrier protein               |
| i02_3953         | CDS         | 3933643      | 3934494    | +                      | gatY                    | putative fructose-1,6-bisphosphate aldolase   |
| i02_3954         | CDS         | 3934604      | 3935812    | -                      | yhhJ                    | hypothetical protein                          |
| i02_3955         | CDS         | 3935728      | 3938463    | -                      | yhiH                    | ABC transporter ATP-binding protein           |
| i02_3956         | CDS         | 3938460      | 3939527    | -                      | yhil                    | hypothetical protein                          |
| i02_3957         | CDS         | 3939520      | 3939651    | -                      | /                       | hypothetical protein                          |
| i02_3958         | CDS         | 3940249      | 3941313    | +                      | yhiM                    | hypothetical protein                          |
| i02_3959         | CDS         | 3941400      | 3942593    | -                      | yhiN                    | hypothetical protein                          |
| i02_3960         | CDS         | 3942825      | 3944324    | +                      | pitA                    | inorganic phosphate transporter               |
| i02_3961         | CDS         | 3944395      | 3944730    | -                      | yhiO                    | universal stress protein UspB                 |
| i02_3962         | CDS         | 3945121      | 3945555    | +                      | uspA                    | universal stress protein A                    |
| i02_3963         | CDS         | 3945738      | 3945917    | -                      | /                       | hypothetical protein                          |
| i02_3964         | CDS         | 3945872      | 3947341    | +                      | yhiP                    | inner membrane transporter YhiP               |
| i02_3965         | CDS         | 3947390      | 3948247    | -                      | yhiQ                    | putative methyltransferase                    |
| i02_3966         | CDS         | 3948150      | 3950231    | -                      | prlC                    | oligopeptidase A                              |
| i02_3967         | CDS         | 3950344      | 3951237    | +                      | yhiR                    | hypothetical protein                          |
| i02_3968         | CDS         | 3951309      | 3952661    | +                      | gor                     | glutathione reductase                         |
| i02_3969         | CDS         | 3952715      | 3952864    | -                      | /                       | hypothetical protein                          |
| i02_3970         | CDS         | 3953133      | 3953558    | +                      | arsC                    | arsenate reductase                            |
| i02_3971         | CDS         | 3953612      | 3953776    | +                      | /                       | hypothetical protein                          |
| i02_3972         | CDS         | 3954175      | 3954348    | +                      | /                       | hypothetical protein                          |
| i02_3973         | CDS         | 3954709      | 3955308    | +                      | slp                     | Outer membrane protein Slp precursor          |
| i02_3974         | CDS         | 3955349      | 3955522    | +                      | /                       | hypothetical protein                          |
| i02_3975         | CDS         | 3955461      | 3955991    | +                      | yhiF                    | putative transcriptional regulator YhiF       |
| i02_3976         | CDS         | 3956048      | 3957076    | -                      | chuS                    | putative heme/hemoglobin transport protein    |
| i02_3977         | CDS         | 3957125      | 3959107    | -                      | chuA                    | Outer membrane heme/hemoglobin receptor       |
| i02_3978         | CDS         | 3959046      | 3959204    | +                      | /                       | hypothetical protein                          |
| i02_3979         | CDS         | 3959208      | 3959393    | -                      | /                       | hypothetical protein                          |
| i02_3980         | CDS         | 3959476      | 3959637    | +                      | /                       | hypothetical protein                          |
| i02_3981         | CDS         | 3959713      | 3960705    | +                      | chuT                    | putative periplasmic binding protein          |
| i02_3982         | CDS         | 3960725      | 3962062    | +                      | chuW                    | coproporphyrinogen III oxidase                |
| i02_3983         | CDS         | 3962075      | 3962569    | +                      | chuX                    | hypothetical protein                          |
| i02_3984         | CDS         | 3962569      | 3963192    | +                      | chuY                    | hypothetical protein                          |
| i02_3985         | CDS         | 3963241      | 3964233    | +                      | chuU                    | iron ABC transporter permease                 |
| i02_3986         | CDS         | 3964200      | 3965000    | +                      | hmuV                    | hemin importer ATP-binding subunit            |
| i02_3987         | CDS         | 3965052      | 3965699    | -                      | yhiD                    | putative Mg(2+) transport ATPase              |
| i02_3988         | CDS         | 3965763      | 3966101    | -                      | hdeB                    | acid-resistance protein                       |
| i02_3989         | CDS         | 3966205      | 3966483    | -                      | hdeA                    | acid-resistance protein                       |
| i02_3990         | CDS         | 3966792      | 3967364    | +                      | hdeD                    | acid-resistance membrane protein              |
| i02_3991         | CDS         | 3968085      | 3968690    | +                      | yhiE                    | hypothetical protein                          |
| i02_3992         | CDS         | 3968734      | 3969027    | +                      | /                       | hypothetical protein                          |
| i02_3993         | CDS         | 3969029      | 3970186    | +                      | yhiU                    | multidrug efflux system protein MdtE          |
| i02_3994         | CDS         | 3970211      | 3973324    | +                      | yhiV                    | hypothetical protein                          |
| i02_3995         | CDS         | 3973687      | 3974415    | -                      | yhiW                    | putative transcriptional regulator YhiW       |
| i02_3996         | pseudo      | 3974784      | 3975608    | -                      | yhiX                    | DNA-binding transcriptional regulator GadX    |
| i02_3997         | CDS         | 3975976      | 3977439    | -                      | gadA                    | glutamate decarboxylase alpha                 |
| i02_3998         | CDS         | 3977587      | 3978984    | -                      | yhjA                    | cytochrome C peroxidase                       |

| Locus_tag | Type | start   | End     | +/- <sup>a</sup> | Gene <sup>b</sup> | Product                                       |
|-----------|------|---------|---------|------------------|-------------------|-----------------------------------------------|
| i02_3999  | CDS  | 3979389 | 3981038 | +                | treF              | trehalase                                     |
| i02_4000  | CDS  | 3981089 | 3981691 | -                | yhjB              | putative transcriptional regulator YhjB       |
| i02_4001  | CDS  | 3981871 | 3981999 | -                | /                 | conserved hypothetical protein                |
| i02_4002  | CDS  | 3982139 | 3983110 | +                | yhjC              | putative transcriptional regulator YhjC       |
| i02_4003  | CDS  | 3983159 | 3984172 | +                | yhjD              | hypothetical protein                          |
| i02_4004  | CDS  | 3984565 | 3985887 | +                | yhjE              | metabolite transport protein                  |
| i02_4005  | CDS  | 3986066 | 3988141 | -                | yhjG              | hypothetical protein                          |
| i02_4006  | CDS  | 3988196 | 3988966 | -                | yhjH              | EAL domain-containing protein                 |
| i02_4007  | CDS  | 3988847 | 3990124 | +                | kdgK              | 2-dehydro-3-deoxygluconokinase                |
| i02_4008  | CDS  | 3990220 | 3991716 | -                | yhjJ              | hypothetical protein                          |
| i02_4009  | CDS  | 3991936 | 3993222 | -                | dctA              | C4-dicarboxylate transporter DctA             |
| i02_4010  | CDS  | 3993405 | 3995321 | -                | yhjK              | putative phosphodiesterase                    |
| i02_4011  | CDS  | 3995475 | 3998948 | -                | yhjL              | cellulose synthase subunit BcsC               |
| i02_4012  | CDS  | 3998930 | 4000042 | -                | yhjM              | endo-1,4-D-glucanase                          |
| i02_4013  | CDS  | 4000043 | 4002469 | -                | yhjN              | cellulose synthase regulator protein          |
| i02_4014  | CDS  | 4002393 | 4005059 | -                | bcsA              | cellulose synthase catalytic subunit          |
| i02_4015  | CDS  | 4005008 | 4005760 | -                | yhjQ              | cell division protein                         |
| i02_4016  | CDS  | 4005772 | 4005960 | -                | yhjR              | hypothetical protein                          |
| i02_4017  | CDS  | 4006233 | 4007804 | +                | yhjS              | hypothetical protein                          |
| i02_4018  | CDS  | 4007801 | 4007992 | +                | yhjT              | hypothetical protein                          |
| i02_4019  | CDS  | 4007989 | 4009668 | +                | yhjU              | hypothetical protein                          |
| i02_4020  | CDS  | 4009754 | 4009996 | -                | /                 | hypothetical protein                          |
| i02_4021  | CDS  | 4009924 | 4010292 | +                | /                 | hypothetical protein                          |
| i02_4023  | CDS  | 4010237 | 4010512 | -                | /                 | hypothetical protein                          |
| i02_4024  | CDS  | 4010509 | 4010670 | -                | /                 | hypothetical protein                          |
| i02_4025  | CDS  | 4010769 | 4012091 | +                | yhjV              | putative transport protein YhjV               |
| i02_4026  | CDS  | 4012121 | 4013125 | -                | dppF              | dipeptide transporter ATP-binding subunit     |
| i02_4027  | CDS  | 4013122 | 4014105 | -                | dppD              | dipeptide transporter ATP-binding subunit     |
| i02_4028  | CDS  | 4014116 | 4015018 | -                | dppC              | dipeptide transporter                         |
| i02_4029  | CDS  | 4015028 | 4016047 | -                | dppB              | dipeptide transporter permease DppB           |
| i02_4030  | CDS  | 4016354 | 4017961 | -                | dppA              | periplasmic dipeptide transport protein       |
| i02_4031  | CDS  | 4018313 | 4018468 | -                | /                 | Hypothetical protein c4363                    |
| i02_4032  | CDS  | 4018873 | 4020564 | -                | yhjW              | phosphoethanolamine transferase               |
| i02_4033  | CDS  | 4020888 | 4022096 | -                | yhjX              | hypothetical protein                          |
| i02_4034  | CDS  | 4022325 | 4023029 | -                | yhjY              | hypothetical protein                          |
| i02_4035  | CDS  | 4023181 | 4023744 | +                | tag               | 3-methyl-adenine DNA glycosylase I            |
| i02_4036  | CDS  | 4023741 | 4024181 | +                | yiaC              | hypothetical protein                          |
| i02_4037  | CDS  | 4024150 | 4026483 | -                | bisC              | biotin sulfoxide reductase                    |
| i02_4038  | CDS  | 4026636 | 4027295 | +                | yiaD              | putative outer membrane lipoprotein           |
| i02_4039  | CDS  | 4027387 | 4028373 | +                | yiaE              | 2-hydroxyacid dehydrogenase                   |
| i02_4040  | CDS  | 4028423 | 4029253 | -                | yiaF              | hypothetical protein                          |
| i02_4041  | CDS  | 4029288 | 4029437 | +                | /                 | hypothetical protein                          |
| i02_4042  | CDS  | 4029567 | 4029857 | +                | /                 | putative transcriptional regulator            |
| i02_4043  | CDS  | 4030138 | 4030350 | +                | cspA              | major cold shock protein                      |
| i02_4044  | CDS  | 4030538 | 4030690 | -                | /                 | small toxic polypeptide                       |
| i02_4045  | CDS  | 4031013 | 4033082 | -                | glyS              | glycyl-tRNA synthetase subunit beta           |
| i02_4046  | CDS  | 4033092 | 4034003 | -                | glyQ              | glycyl-tRNA synthetase subunit alpha          |
| i02_4047  | CDS  | 4034098 | 4034397 | -                | /                 | hypothetical protein                          |
| i02_4048  | CDS  | 4034572 | 4035567 | +                | yiaH              | hypothetical protein                          |
| i02_4049  | CDS  | 4035609 | 4036049 | -                | yiaA              | hypothetical protein                          |
| i02_4050  | CDS  | 4036092 | 4036475 | -                | yiaB              | hypothetical protein                          |
| i02_4051  | CDS  | 4036602 | 4038056 | -                | xylB              | xylulokinase                                  |
| i02_4052  | CDS  | 4038128 | 4039450 | -                | xylA              | xylose isomerase                              |
| i02_4053  | CDS  | 4039738 | 4040808 | +                | xylF              | D-xylose transporter subunit XylF             |
| i02_4054  | CDS  | 4040886 | 4042427 | +                | xylG              | xylose transporter ATP-binding subunit        |
| i02_4055  | CDS  | 4042405 | 4043586 | +                | xylH              | xylose transport system permease protein xylH |
| i02_4056  | CDS  | 4043664 | 4044842 | +                | xylR              | xylose operon regulatory protein              |
| i02_4057  | CDS  | 4044950 | 4045774 | -                | bax               | hypothetical protein                          |

| <b>Locus_tag</b> | <b>Type</b> | <b>start</b> | <b>End</b> | <b>+/-<sup>a</sup></b> | <b>Gene<sup>b</sup></b> | <b>Product</b>                                   |
|------------------|-------------|--------------|------------|------------------------|-------------------------|--------------------------------------------------|
| i02_4058         | CDS         | 4045924      | 4046097    | +                      | /                       | hypothetical protein                             |
| i02_4059         | CDS         | 4046094      | 4048124    | +                      | malS                    | periplasmic alpha-amylase precursor              |
| i02_4060         | CDS         | 4048302      | 4049555    | +                      | avtA                    | valine--pyruvate transaminase                    |
| i02_4061         | CDS         | 4049707      | 4050186    | -                      | yiaI                    | putative electron transport protein ysaA         |
| i02_4062         | CDS         | 4050282      | 4051130    | -                      | yiaJ                    | putative transcriptional regulator YiaJ          |
| i02_4063         | CDS         | 4051331      | 4052329    | +                      | yiaK                    | 2,3-diketo-L-gulonate reductase                  |
| i02_4064         | CDS         | 4052341      | 4052805    | +                      | yiaL                    | hypothetical protein                             |
| i02_4065         | CDS         | 4052828      | 4053748    | +                      | /                       | hypothetical protein                             |
| i02_4066         | CDS         | 4053862      | 4054329    | +                      | yiaM                    | 2,3-diketo-L-gulonate TRAP transporter           |
| i02_4067         | CDS         | 4054134      | 4055609    | +                      | yiaN                    | hypothetical protein                             |
| i02_4068         | CDS         | 4055622      | 4056608    | +                      | yiaO                    | ABC transporter periplasmic-binding protein      |
| i02_4069         | CDS         | 4056612      | 4058108    | +                      | lyxK                    | Cryptic L-xylulose kinase                        |
| i02_4070         | CDS         | 4058105      | 4058767    | +                      | sgbH                    | 3-keto-L-gulonate-6-phosphate decarboxylase      |
| i02_4071         | CDS         | 4058727      | 4059620    | +                      | sgbU                    | putative L-xylulose 5-phosphate 3-epimerase      |
| i02_4072         | CDS         | 4059614      | 4060309    | +                      | sgbE                    | L-ribulose-5-phosphate 4-epimerase               |
| i02_4073         | CDS         | 4060356      | 4061984    | -                      | aldB                    | aldehyde dehydrogenase B                         |
| i02_4074         | CDS         | 4062002      | 4063297    | -                      | /                       | hypothetical protein                             |
| i02_4075         | CDS         | 4063427      | 4064578    | -                      | yiaY                    | putative alcohol dehydrogenase                   |
| i02_4076         | CDS         | 4064769      | 4066613    | -                      | selB                    | selenocysteinyl-tRNA-specific translation factor |
| i02_4077         | CDS         | 4066610      | 4068001    | -                      | selA                    | selenocysteine synthase                          |
| i02_4078         | CDS         | 4068099      | 4068707    | -                      | yibF                    | putative glutathione S-transferase               |
| i02_4079         | CDS         | 4068778      | 4069914    | -                      | yibH                    | hypothetical protein                             |
| i02_4080         | CDS         | 4069917      | 4070279    | -                      | yibI                    | hypothetical protein                             |
| i02_4081         | CDS         | 4070816      | 4072729    | +                      | mtIA                    | PTS system, mannitol-specific IIABC component    |
| i02_4082         | CDS         | 4072969      | 4074297    | +                      | mtID                    | mannitol-1-phosphate 5-dehydrogenase             |
| i02_4083         | CDS         | 4074297      | 4074884    | +                      | mtIR                    | mannitol repressor protein                       |
| i02_4084         | CDS         | 4074895      | 4075104    | -                      | /                       | hypothetical protein                             |
| i02_4085         | CDS         | 4075388      | 4075750    | +                      | yibL                    | hypothetical protein                             |
| i02_4086         | CDS         | 4076006      | 4076173    | -                      | /                       | hypothetical protein                             |
| i02_4087         | CDS         | 4076309      | 4076992    | +                      | /                       | hypothetical protein                             |
| i02_4088         | CDS         | 4077036      | 4082372    | +                      | /                       | putative adhesin                                 |
| i02_4089         | CDS         | 4082763      | 4084439    | +                      | lldP                    | L-lactate permease                               |
| i02_4090         | CDS         | 4084424      | 4085215    | +                      | lldR                    | DNA-binding transcriptional repressor LldR       |
| i02_4091         | CDS         | 4085212      | 4086402    | +                      | lldD                    | L-lactate dehydrogenase                          |
| i02_4092         | CDS         | 4086450      | 4086923    | +                      | yibK                    | putative tRNA/rRNA methyltransferase YibK        |
| i02_4093         | CDS         | 4086978      | 4087799    | -                      | cysE                    | serine acetyltransferase                         |
| i02_4094         | CDS         | 4087879      | 4088898    | -                      | gpsA                    | NAD(P)H-dependent glycerol-3-phosphate           |
| i02_4095         | CDS         | 4088877      | 4089362    | +                      | /                       | hypothetical protein                             |
| i02_4096         | CDS         | 4088898      | 4089425    | -                      | secB                    | preprotein translocase subunit SecB              |
| i02_4097         | CDS         | 4089429      | 4089680    | -                      | grxC                    | glutaredoxin 3                                   |
| i02_4098         | CDS         | 4089495      | 4089758    | +                      | /                       | hypothetical protein                             |
| i02_4099         | CDS         | 4089821      | 4090264    | -                      | yibN                    | hypothetical protein                             |
| i02_4100         | CDS         | 4090276      | 4090473    | +                      | /                       | hypothetical protein                             |
| i02_4101         | CDS         | 4090497      | 4092041    | +                      | yibO                    | phosphoglyceromutase                             |
| i02_4102         | CDS         | 4092051      | 4093334    | +                      | yibP                    | hypothetical protein                             |
| i02_4103         | CDS         | 4093338      | 4094297    | +                      | yibQ                    | hypothetical protein                             |
| i02_4104         | CDS         | 4094284      | 4095318    | -                      | yibD                    | putative glycosyl transferase                    |
| i02_4105         | CDS         | 4095557      | 4096582    | -                      | tdh                     | L-threonine 3-dehydrogenase                      |
| i02_4106         | CDS         | 4096592      | 4097788    | -                      | kbl                     | 2-amino-3-ketobutyrate coenzyme A ligase         |
| i02_4107         | CDS         | 4098002      | 4098934    | +                      | rfaD                    | ADP-L-glycero-D-mannoheptose-6-epimerase         |
| i02_4108         | CDS         | 4098944      | 4099990    | +                      | rfaF                    | ADP-heptose:LPS heptosyltransferase II           |
| i02_4109         | CDS         | 4099994      | 4100974    | +                      | rfaC                    | ADP-heptose:LPS heptosyl transferase I           |
| i02_4110         | CDS         | 4101044      | 4102297    | -                      | waaL                    | Lipid A-core, surface polymer ligase             |
| i02_4111         | CDS         | 4102343      | 4103326    | -                      | waaV                    | putative beta1,3-glucosyltransferase             |
| i02_4112         | CDS         | 4103408      | 4104436    | -                      | waaW                    | UDP-galactose:(galactosyl) LPS                   |
| i02_4113         | CDS         | 4104462      | 4105154    | -                      | rfaY                    | lipopolysaccharide core biosynthesis protein     |
| i02_4114         | CDS         | 4105164      | 4106159    | -                      | rfaJ                    | lipopolysaccharide 1,2-glucosyltransferase       |
| i02_4115         | CDS         | 4106176      | 4107192    | -                      | rfaI                    | lipopolysaccharide 1,3-galactosyltransferase     |

| <b>Locus_tag</b> | <b>Type</b> | <b>start</b> | <b>End</b> | <b>+/-<sup>a</sup></b> | <b>Gene<sup>b</sup></b> | <b>Product</b>                               |
|------------------|-------------|--------------|------------|------------------------|-------------------------|----------------------------------------------|
| i02_4116         | CDS         | 4107208      | 4108014    | -                      | rfaP                    | lipopolysaccharide core biosynthesis protein |
| i02_4117         | CDS         | 4107998      | 4109122    | -                      | rfaG                    | lipopolysaccharide core biosynthesis protein |
| i02_4118         | CDS         | 4109119      | 4110177    | -                      | rfaQ                    | lipopolysaccharide core biosynthesis protein |
| i02_4119         | CDS         | 4110590      | 4111867    | +                      | kdtA                    | 3-deoxy-D-manno-octulosonic-acid transferase |
| i02_4120         | CDS         | 4111875      | 4112354    | +                      | coaD                    | phosphopantetheine adenylyltransferase       |
| i02_4121         | CDS         | 4112393      | 4113202    | -                      | mutM                    | formamidopyrimidine-DNA glycosylase          |
| i02_4122         | CDS         | 4113300      | 4113467    | -                      | rpmG                    | 50S ribosomal protein L33                    |
| i02_4123         | CDS         | 4113488      | 4113724    | -                      | rpmB                    | 50S ribosomal protein L28                    |
| i02_4124         | CDS         | 4113941      | 4114615    | -                      | radC                    | DNA repair protein RadC                      |
| i02_4125         | CDS         | 4114781      | 4116001    | +                      | dfp                     | bifunctional phosphopantothenoylcysteine     |
| i02_4126         | CDS         | 4115979      | 4116437    | +                      | dut                     | deoxyuridine triphosphatase                  |
| i02_4127         | CDS         | 4116502      | 4117140    | +                      | slmA                    | nucleoid occlusion protein                   |
| i02_4128         | CDS         | 4117177      | 4117833    | -                      | pyrE                    | orotate phosphoribosyltransferase            |
| i02_4129         | CDS         | 4117884      | 4118600    | -                      | rph                     | ribonuclease PH                              |
| i02_4130         | CDS         | 4118727      | 4119590    | +                      | yicC                    | hypothetical protein                         |
| i02_4131         | CDS         | 4119800      | 4120636    | +                      | dinD                    | DNA-damage-inducible protein D               |
| i02_4132         | CDS         | 4120874      | 4121545    | +                      | yicG                    | hypothetical protein                         |
| i02_4133         | CDS         | 4121542      | 4123230    | -                      | ligB                    | NAD-dependent DNA ligase LigB                |
| i02_4134         | CDS         | 4123085      | 4123348    | -                      | /                       | hypothetical protein                         |
| i02_4135         | CDS         | 4123425      | 4124105    | +                      | gmk                     | guanylate kinase                             |
| i02_4136         | CDS         | 4124160      | 4124435    | +                      | rpoZ                    | DNA-directed RNA polymerase subunit omega    |
| i02_4137         | CDS         | 4124454      | 4126562    | +                      | spoT                    | bifunctional (p)ppGpp synthetase II          |
| i02_4138         | CDS         | 4126569      | 4127258    | +                      | spoU                    | tRNA guanosine-2'-O-methyltransferase        |
| i02_4139         | CDS         | 4127231      | 4129345    | +                      | recG                    | ATP-dependent DNA helicase RecG              |
| i02_4140         | CDS         | 4129379      | 4130584    | -                      | gltS                    | Sodium/glutamate symport carrier protein     |
| i02_4141         | CDS         | 4130855      | 4132255    | +                      | yicE                    | putative purine permease yicE                |
| i02_4142         | CDS         | 4132352      | 4134085    | +                      | yicH                    | hypothetical protein                         |
| i02_4143         | CDS         | 4134129      | 4134848    | -                      | /                       | hypothetical protein                         |
| i02_4144         | CDS         | 4134790      | 4135755    | -                      | /                       | hypothetical protein                         |
| i02_4145         | CDS         | 4135770      | 4136630    | -                      | /                       | hypothetical protein                         |
| i02_4146         | CDS         | 4136711      | 4137562    | -                      | /                       | putative aldolase                            |
| i02_4147         | CDS         | 4137574      | 4138665    | -                      | /                       | putative PTS enzyme-II fructose              |
| i02_4148         | CDS         | 4138690      | 4139004    | -                      | /                       | PTS system, fructose-like-2 IIB component 1  |
| i02_4149         | CDS         | 4139022      | 4139492    | -                      | /                       | putative phosphotransferase system (PTS),    |
| i02_4150         | CDS         | 4139519      | 4141072    | -                      | /                       | putative transcriptional antiterminator      |
| i02_4151         | CDS         | 4141218      | 4141343    | -                      | /                       | hypothetical protein                         |
| i02_4152         | CDS         | 4141355      | 4143673    | -                      | yicI                    | alpha-xylosidase YicI                        |
| i02_4153         | CDS         | 4143683      | 4145122    | -                      | yicJ                    | putative transporter                         |
| i02_4154         | CDS         | 4145753      | 4146964    | +                      | intC                    | putative prophage integrase                  |
| i02_4155         | CDS         | 4147163      | 4148242    | -                      | /                       | conserved hypothetical protein               |
| i02_4156         | CDS         | 4149042      | 4150868    | -                      | /                       | conserved hypothetical protein               |
| i02_4157         | CDS         | 4151346      | 4152446    | -                      | /                       | conserved hypothetical protein               |
| i02_4158         | CDS         | 4152900      | 4153583    | +                      | /                       | putative transcriptional regulator YfjR      |
| i02_4159         | CDS         | 4153623      | 4154636    | +                      | /                       | small GTP-binding domain protein             |
| i02_4160         | CDS         | 4154648      | 4155433    | +                      | /                       | conserved hypothetical protein               |
| i02_4161         | CDS         | 4155635      | 4155853    | -                      | /                       | hypothetical protein                         |
| i02_4162         | CDS         | 4155971      | 4156585    | -                      | /                       | hypothetical protein                         |
| i02_4163         | CDS         | 4157178      | 4158131    | +                      | /                       | conserved hypothetical protein               |
| i02_4164         | CDS         | 4158367      | 4158807    | +                      | /                       | hypothetical protein                         |
| i02_4165         | CDS         | 4159211      | 4159684    | +                      | /                       | DNA repair protein RadC                      |
| i02_4166         | CDS         | 4160050      | 4160475    | +                      | /                       | hypothetical protein                         |
| i02_4167         | CDS         | 4160496      | 4161893    | +                      | /                       | ATP binding protein                          |
| i02_4168         | CDS         | 4161890      | 4162621    | +                      | /                       | conserved hypothetical protein               |
| i02_4169         | CDS         | 4162659      | 4162793    | +                      | /                       | hypothetical protein                         |
| i02_4170         | CDS         | 4163013      | 4163132    | +                      | /                       | hypothetical protein                         |
| i02_4171         | CDS         | 4163469      | 4163630    | +                      | /                       | hypothetical protein                         |
| i02_4172         | CDS         | 4163950      | 4164171    | +                      | /                       | hypothetical protein                         |
| i02_4173         | CDS         | 4164312      | 4164809    | +                      | /                       | hypothetical protein                         |



| Locus_tag | Type | start   | End     | +/- <sup>a</sup> | Gene <sup>b</sup> | Product                                            |
|-----------|------|---------|---------|------------------|-------------------|----------------------------------------------------|
| i02_4174  | CDS  | 4164922 | 4165899 | +                | yicL              | putative transport protein YicL                    |
| i02_4175  | CDS  | 4165903 | 4166721 | -                | nlpA              | cytoplasmic membrane lipoprotein-28                |
| i02_4176  | CDS  | 4166718 | 4166861 | -                | /                 | hypothetical protein                               |
| i02_4177  | CDS  | 4166874 | 4167236 | +                | /                 | hypothetical protein                               |
| i02_4178  | CDS  | 4167277 | 4168467 | -                | nepI              | ribonucleoside transporter                         |
| i02_4179  | CDS  | 4168678 | 4169157 | -                | yicN              | hypothetical protein                               |
| i02_4180  | CDS  | 4169183 | 4170595 | -                | yicO              | hypothetical protein                               |
| i02_4181  | CDS  | 4170692 | 4172458 | +                | yicP              | cryptic adenine deaminase                          |
| i02_4182  | CDS  | 4172505 | 4173896 | -                | uhpT              | sugar phosphate antiporter                         |
| i02_4183  | CDS  | 4174034 | 4175356 | -                | uhpC              | regulatory protein UhpC                            |
| i02_4184  | CDS  | 4175363 | 4176871 | -                | uhpB              | sensory histidine kinase UhpB                      |
| i02_4185  | CDS  | 4176865 | 4177455 | -                | uhpA              | DNA-binding transcriptional activator UhpA         |
| i02_4186  | CDS  | 4177870 | 4178730 | +                | /                 | hypothetical protein                               |
| i02_4187  | CDS  | 4178921 | 4179211 | -                | ilvN              | acetolactate synthase 1 regulatory subunit         |
| i02_4188  | CDS  | 4179215 | 4180903 | -                | ilvB              | acetolactate synthase catalytic subunit            |
| i02_4189  | CDS  | 4180887 | 4181219 | +                | /                 | hypothetical protein                               |
| i02_4190  | CDS  | 4181502 | 4182692 | +                | emrD              | multidrug resistance protein D                     |
| i02_4191  | CDS  | 4182700 | 4183197 | -                | yidF              | hypothetical protein                               |
| i02_4192  | CDS  | 4183194 | 4183556 | -                | yidG              | hypothetical protein                               |
| i02_4193  | CDS  | 4183546 | 4183953 | -                | yidH              | hypothetical protein                               |
| i02_4194  | CDS  | 4183953 | 4185446 | -                | yidJ              | putative sulfatase yidJ                            |
| i02_4195  | CDS  | 4185443 | 4187158 | -                | yidK              | putative symporter YidK                            |
| i02_4196  | CDS  | 4187295 | 4188191 | +                | yidL              | putative transcriptional regulator YidL            |
| i02_4197  | CDS  | 4188281 | 4189966 | -                | yidE              | hypothetical protein                               |
| i02_4198  | CDS  | 4189972 | 4190142 | +                | /                 | hypothetical protein                               |
| i02_4199  | CDS  | 4190139 | 4190567 | -                | ibpB              | heat shock chaperone IbpB                          |
| i02_4200  | CDS  | 4190679 | 4191092 | -                | ibpA              | heat shock protein IbpA                            |
| i02_4201  | CDS  | 4191323 | 4191730 | +                | yidQ              | hypothetical protein                               |
| i02_4202  | CDS  | 4191732 | 4192982 | -                | yidR              | hypothetical protein                               |
| i02_4203  | CDS  | 4192914 | 4193042 | +                | /                 | hypothetical protein                               |
| i02_4204  | CDS  | 4193026 | 4194147 | +                | yidS              | putative oxidoreductase                            |
| i02_4205  | CDS  | 4194108 | 4195445 | -                | dgoT              | D-galactonate transporter                          |
| i02_4206  | CDS  | 4195520 | 4196668 | -                | rspA              | starvation sensing protein RspA                    |
| i02_4207  | CDS  | 4196665 | 4197282 | -                | dgoA              | Z-erythritol-5-deoxy-D-phosphogalactonate aldolase |
| i02_4208  | CDS  | 4197266 | 4198144 | -                | dgoK              | 2-dehydro-3-deoxygalactonokinase                   |
| i02_4209  | CDS  | 4198141 | 4198830 | -                | /                 | hypothetical protein                               |
| i02_4210  | CDS  | 4199109 | 4199765 | +                | /                 | hypothetical protein                               |
| i02_4212  | CDS  | 4199809 | 4200621 | -                | yidA              | sugar phosphatase                                  |
| i02_4213  | CDS  | 4200736 | 4201143 | -                | yidB              | hypothetical protein                               |
| i02_4214  | CDS  | 4201374 | 4203791 | -                | gyrB              | DNA gyrase subunit B                               |
| i02_4215  | CDS  | 4203817 | 4204890 | -                | recF              | recombination protein F                            |
| i02_4216  | CDS  | 4204890 | 4205990 | -                | dnaN              | DNA polymerase III subunit beta                    |
| i02_4217  | CDS  | 4205995 | 4207410 | -                | yfgE              | DNA replication initiation factor                  |
| i02_4218  | CDS  | 4207692 | 4207892 | -                | /                 | hypothetical protein                               |
| i02_4219  | CDS  | 4208005 | 4208145 | +                | /                 | 50S ribosomal protein L34                          |
| i02_4220  | CDS  | 4208162 | 4208521 | +                | rnpA              | ribonuclease P                                     |
| i02_4221  | CDS  | 4208745 | 4210391 | +                | yidC              | putative inner membrane protein translocase        |
| i02_4222  | CDS  | 4210497 | 4211861 | +                | trmE              | tRNA modification GTPase TrmE                      |
| i02_4223  | CDS  | 4212103 | 4212177 | +                | tnaL              | tryptophanase leader peptide                       |
| i02_4224  | CDS  | 4212383 | 4213813 | +                | tnaA              | tryptophanase                                      |
| i02_4225  | CDS  | 4213905 | 4215152 | +                | tnaB              | tryptophan permease TnaB                           |
| i02_4226  | CDS  | 4215284 | 4216459 | +                | yidY              | multidrug efflux system protein MdtL               |
| i02_4227  | CDS  | 4216425 | 4217393 | +                | yidZ              | DNA-binding transcriptional regulator YidZ         |
| i02_4228  | CDS  | 4217538 | 4218299 | +                | yieE              | hypothetical protein                               |
| i02_4229  | CDS  | 4218321 | 4218887 | +                | yieF              | hypothetical protein                               |
| i02_4230  | CDS  | 4218941 | 4220278 | -                | yieG              | hypothetical protein                               |
| i02_4231  | CDS  | 4220445 | 4221110 | +                | yieH              | 6-phosphogluconate phosphatase                     |
| i02_4232  | CDS  | 4221177 | 4221650 | +                | yieI              | putative inner membrane protein                    |

| <b>Locus_tag</b> | <b>Type</b> | <b>start</b> | <b>End</b> | <b>+/-<sup>a</sup></b> | <b>Gene<sup>b</sup></b> | <b>Product</b>                                      |
|------------------|-------------|--------------|------------|------------------------|-------------------------|-----------------------------------------------------|
| i02_4233         | CDS         | 4221732      | 4222448    | -                      | yeiK                    | putative 6-phosphogluconolactonase                  |
| i02_4234         | CDS         | 4222469      | 4223671    | -                      | yeiL                    | hypothetical protein                                |
| i02_4235         | CDS         | 4223665      | 4225281    | -                      | /                       | hypothetical protein                                |
| i02_4236         | CDS         | 4225367      | 4226761    | -                      | bglB                    | 6-phospho-beta-glucosidase bglB                     |
| i02_4237         | CDS         | 4226780      | 4228729    | -                      | bglF                    | beta-glucoside-specific PTS system components       |
| i02_4239         | CDS         | 4228788      | 4229648    | -                      | bglG                    | transcriptional antiterminator BglG                 |
| i02_4240         | CDS         | 4229690      | 4229812    | +                      | /                       | hypothetical protein                                |
| i02_4241         | CDS         | 4229910      | 4230635    | -                      | phoU                    | transcriptional regulator PhoU                      |
| i02_4242         | CDS         | 4230650      | 4231423    | -                      | pstB                    | phosphate transporter subunit                       |
| i02_4243         | CDS         | 4231514      | 4232404    | -                      | pstA                    | phosphate transporter permease subunit PtsA         |
| i02_4244         | CDS         | 4232404      | 4233363    | -                      | pstC                    | phosphate transporter permease subunit PstC         |
| i02_4245         | CDS         | 4233450      | 4234490    | -                      | pstS                    | phosphate ABC transporter periplasmic               |
| i02_4246         | CDS         | 4234804      | 4236633    | -                      | glmS                    | L-glutamine:D-fructose-6-phosphate aminotransferase |
| i02_4247         | CDS         | 4236794      | 4238164    | -                      | glmU                    | glucosamine uridyltransferase                       |
| i02_4249         | CDS         | 4238518      | 4238937    | -                      | atpC                    | F0F1 ATP synthase subunit epsilon                   |
| i02_4250         | CDS         | 4238958      | 4240340    | -                      | atpD                    | F0F1 ATP synthase subunit beta                      |
| i02_4251         | CDS         | 4240367      | 4241230    | -                      | atpG                    | F0F1 ATP synthase subunit gamma                     |
| i02_4252         | CDS         | 4241281      | 4242822    | -                      | atpA                    | F0F1 ATP synthase subunit alpha                     |
| i02_4253         | CDS         | 4242835      | 4243368    | -                      | atpH                    | F0F1 ATP synthase subunit delta                     |
| i02_4254         | CDS         | 4243009      | 4243746    | +                      | /                       | hypothetical protein                                |
| i02_4255         | CDS         | 4243383      | 4243853    | -                      | atpF                    | F0F1 ATP synthase subunit B                         |
| i02_4256         | CDS         | 4243915      | 4244154    | -                      | atpE                    | F0F1 ATP synthase subunit C                         |
| i02_4257         | CDS         | 4244201      | 4245016    | -                      | atpB                    | F0F1 ATP synthase subunit A                         |
| i02_4258         | CDS         | 4245025      | 4245417    | -                      | atpI                    | F0F1 ATP synthase subunit I                         |
| i02_4259         | CDS         | 4246022      | 4246645    | -                      | gidB                    | 16S rRNA methyltransferase GidB                     |
| i02_4260         | CDS         | 4246709      | 4248598    | -                      | gidA                    | protein involved in a tRNA modification pathway     |
| i02_4261         | CDS         | 4248977      | 4249420    | -                      | miuC                    | flavodoxin                                          |
| i02_4262         | CDS         | 4249510      | 4249968    | -                      | asnC                    | DNA-binding transcriptional regulator AsnC          |
| i02_4263         | CDS         | 4250120      | 4251112    | +                      | asnA                    | asparagine synthetase AsnA                          |
| i02_4264         | CDS         | 4251117      | 4252568    | -                      | yeiM                    | hypothetical protein                                |
| i02_4265         | CDS         | 4252562      | 4254058    | -                      | yeiN                    | regulatory ATPase RavA                              |
| i02_4266         | CDS         | 4254281      | 4256149    | +                      | trkD                    | potassium transport protein Kup                     |
| i02_4267         | CDS         | 4256316      | 4256735    | +                      | rbsD                    | D-ribose pyranase                                   |
| i02_4268         | CDS         | 4256743      | 4258248    | +                      | rbsA                    | D-ribose transporter ATP binding protein            |
| i02_4269         | CDS         | 4258253      | 4259218    | +                      | rbsC                    | ribose ABC transporter permease protein             |
| i02_4270         | CDS         | 4259237      | 4260133    | +                      | rbsB                    | D-ribose transporter subunit RbsB                   |
| i02_4271         | CDS         | 4260232      | 4261188    | +                      | rbsK                    | ribokinase                                          |
| i02_4272         | CDS         | 4261192      | 4262184    | +                      | rbsR                    | transcriptional repressor RbsR                      |
| i02_4273         | CDS         | 4262150      | 4263577    | -                      | yeiO                    | putative transport protein YeiO                     |
| i02_4274         | CDS         | 4263600      | 4264292    | -                      | yeiP                    | putative transcriptional regulator YeiP             |
| i02_4276         | CDS         | 4270092      | 4270931    | -                      | yifA                    | transcriptional regulator HdfR                      |
| i02_4277         | CDS         | 4271050      | 4271388    | +                      | yifE                    | hypothetical protein                                |
| i02_4279         | CDS         | 4271413      | 4272963    | -                      | yifB                    | hypothetical protein                                |
| i02_4280         | CDS         | 4272954      | 4273139    | -                      | /                       | hypothetical protein                                |
| i02_4281         | CDS         | 4273524      | 4275170    | +                      | ilvG                    | acetolactate synthase 2 catalytic subunit           |
| i02_4282         | CDS         | 4275167      | 4275430    | +                      | ilvM                    | acetolactate synthase 2 regulatory subunit          |
| i02_4283         | CDS         | 4275450      | 4276379    | +                      | ilvE                    | branched-chain amino acid aminotransferase          |
| i02_4284         | CDS         | 4276444      | 4278294    | +                      | ilvD                    | dihydroxy-acid dehydratase                          |
| i02_4285         | CDS         | 4278294      | 4279841    | +                      | ilvA                    | threonine dehydratase                               |
| i02_4286         | CDS         | 4279838      | 4280812    | -                      | ilvY                    | DNA-binding transcriptional regulator IlvY          |
| i02_4287         | CDS         | 4280878      | 4282353    | +                      | ilvC                    | ketol-acid reductoisomerase                         |
| i02_4288         | CDS         | 4282399      | 4282680    | -                      | ppiC                    | peptidyl-prolyl cis-trans isomerase C               |
| i02_4289         | CDS         | 4282767      | 4284788    | +                      | rep                     | ATP-dependent DNA helicase Rep                      |
| i02_4290         | CDS         | 4284835      | 4286328    | -                      | gppA                    | guanosine pentaphosphate phosphohydrolase           |
| i02_4291         | CDS         | 4286325      | 4286447    | -                      | /                       | hypothetical protein                                |
| i02_4292         | CDS         | 4286455      | 4287720    | -                      | rhIB                    | ATP-dependent RNA helicase RhIB                     |
| i02_4293         | CDS         | 4287746      | 4288180    | +                      | trxA                    | thioredoxin                                         |

| Locus_tag | Type | start   | End     | +/- <sup>a</sup> | Gene <sup>b</sup> | Product                                                   |
|-----------|------|---------|---------|------------------|-------------------|-----------------------------------------------------------|
| i02_4294  | CDS  | 4287845 | 4288237 | -                | /                 | hypothetical protein                                      |
| i02_4295  | CDS  | 4288435 | 4289766 | +                | rho               | transcription termination factor Rho                      |
| i02_4296  | CDS  | 4289776 | 4289901 | +                | /                 | hypothetical protein                                      |
| i02_4297  | CDS  | 4290006 | 4291109 | +                | rfe               | undecaprenyl-phosphate                                    |
| i02_4298  | CDS  | 4291118 | 4292167 | +                | wzzE              | lipopolysaccharide biosynthesis protein WzzE              |
| i02_4299  | CDS  | 4292205 | 4293353 | +                | wecB              | UDP-N-acetylglucosamine 2-epimerase                       |
| i02_4300  | CDS  | 4293350 | 4294612 | +                | wecC              | UDP-N-acetyl-D-mannosamine dehydrogenase                  |
| i02_4301  | CDS  | 4294612 | 4295679 | +                | rffG              | dTDP-glucose 4,6-dehydratase                              |
| i02_4302  | CDS  | 4295698 | 4296579 | +                | rffH              | glucose-1-phosphate thymidyltransferase                   |
| i02_4303  | CDS  | 4296557 | 4297231 | +                | wecD              | TDP-fucosamine acetyltransferase                          |
| i02_4304  | CDS  | 4297236 | 4298366 | +                | wecE              | TDP-4-oxo-6-deoxy-D-glucose transaminase                  |
| i02_4305  | CDS  | 4297383 | 4298417 | -                | /                 | hypothetical protein                                      |
| i02_4306  | CDS  | 4298368 | 4299618 | +                | wzxE              | WzxE protein                                              |
| i02_4307  | CDS  | 4299615 | 4300694 | +                | /                 | 4-alpha-L-fucosyltransferase                              |
| i02_4308  | CDS  | 4300691 | 4302043 | +                | wecF              | putative common antigen polymerase                        |
| i02_4309  | CDS  | 4302046 | 4302786 | +                | wecG              | putative UDP-N-acetyl-D-mannosaminuronic acid transferase |
| i02_4310  | CDS  | 4302977 | 4304362 | +                | yifK              | putative transport protein YifK                           |
| i02_4311  | CDS  | 4305048 | 4306283 | +                | asIB              | putative arylsulfatase regulatory protein                 |
| i02_4312  | CDS  | 4306441 | 4308096 | -                | asIA              | arylsulfatase                                             |
| i02_4313  | CDS  | 4307993 | 4308148 | +                | /                 | hypothetical protein                                      |
| i02_4314  | CDS  | 4308775 | 4309938 | -                | hemY              | putative protoheme IX biogenesis protein                  |
| i02_4315  | CDS  | 4309974 | 4311185 | -                | hemX              | putative uroporphyrinogen III                             |
| i02_4316  | CDS  | 4311207 | 4311947 | -                | hemD              | uroporphyrinogen-III synthase                             |
| i02_4317  | CDS  | 4311944 | 4312906 | -                | hemC              | porphobilinogen deaminase                                 |
| i02_4318  | CDS  | 4313272 | 4315818 | +                | cyaA              | adenylate cyclase                                         |
| i02_4319  | CDS  | 4315858 | 4316178 | -                | cyaY              | frataxin-like protein                                     |
| i02_4320  | CDS  | 4316226 | 4317545 | -                | /                 | hypothetical protein                                      |
| i02_4321  | CDS  | 4317542 | 4319041 | -                | /                 | hypothetical protein                                      |
| i02_4322  | CDS  | 4319200 | 4319403 | +                | /                 | hypothetical protein                                      |
| i02_4323  | CDS  | 4319437 | 4320264 | +                | dapF              | diaminopimelate epimerase                                 |
| i02_4324  | CDS  | 4320261 | 4320968 | +                | yigA              | hypothetical protein                                      |
| i02_4325  | CDS  | 4320965 | 4321861 | +                | xerC              | site-specific tyrosine recombinase XerC                   |
| i02_4326  | CDS  | 4321861 | 4322577 | +                | yigB              | flavin mononucleotide phosphatase                         |
| i02_4327  | CDS  | 4322661 | 4324823 | +                | uvrD              | DNA-dependent helicase II                                 |
| i02_4328  | CDS  | 4324878 | 4325780 | -                | /                 | hypothetical protein                                      |
| i02_4329  | CDS  | 4325863 | 4326627 | -                | /                 | hypothetical protein                                      |
| i02_4330  | CDS  | 4326640 | 4326753 | +                | /                 | hypothetical protein                                      |
| i02_4331  | CDS  | 4326997 | 4327947 | +                | corA              | magnesium/nickel/cobalt transporter CorA                  |
| i02_4332  | CDS  | 4327983 | 4328480 | -                | /                 | hypothetical protein                                      |
| i02_4333  | CDS  | 4328477 | 4329325 | -                | /                 | hypothetical protein                                      |
| i02_4334  | CDS  | 4329636 | 4330526 | -                | rarD              | protein rarD                                              |
| i02_4335  | CDS  | 4330578 | 4331063 | -                | yigl              | hypothetical protein                                      |
| i02_4336  | CDS  | 4331209 | 4332078 | +                | pldA              | phospholipase A                                           |
| i02_4337  | CDS  | 4332082 | 4332243 | +                | /                 | hypothetical protein                                      |
| i02_4338  | CDS  | 4332197 | 4334032 | +                | recQ              | ATP-dependent DNA helicase RecQ                           |
| i02_4339  | CDS  | 4334096 | 4334716 | +                | /                 | threonine efflux system                                   |
| i02_4340  | CDS  | 4334777 | 4335397 | -                | rhtB              | homoserine/homoserine lactone efflux protein              |
| i02_4341  | CDS  | 4335508 | 4336530 | +                | pldB              | lysophospholipase L2                                      |
| i02_4342  | CDS  | 4336421 | 4337338 | +                | /                 | putative sugar phosphatase                                |
| i02_4343  | CDS  | 4337339 | 4338313 | +                | yigM              | membrane protein yigM                                     |
| i02_4344  | CDS  | 4338201 | 4339154 | -                | metR              | transcriptional activator protein metR                    |
| i02_4345  | CDS  | 4339164 | 4339289 | -                | /                 | hypothetical protein                                      |
| i02_4346  | CDS  | 4339272 | 4341533 | +                | metE              | cobalamin-independent homocysteine transmethylase         |
| i02_4347  | CDS  | 4341540 | 4341665 | -                | /                 | hypothetical protein                                      |
| i02_4348  | CDS  | 4341702 | 4341962 | -                | /                 | hypothetical protein                                      |
| i02_4349  | CDS  | 4342022 | 4342279 | -                | /                 | hypothetical protein                                      |

| Locus_tag | Type | start   | End     | +/- <sup>a</sup> | Gene <sup>b</sup> | Product                                                 |
|-----------|------|---------|---------|------------------|-------------------|---------------------------------------------------------|
| i02_4350  | CDS  | 4342276 | 4342965 | -                | /                 | hypothetical protein                                    |
| i02_4351  | CDS  | 4343644 | 4343775 | +                | /                 | hypothetical protein                                    |
| i02_4352  | CDS  | 4343882 | 4344451 | +                | /                 | hypothetical protein                                    |
| i02_4353  | CDS  | 4344493 | 4346001 | +                | /                 | PTS system, glucose-specific IIBC component             |
| i02_4354  | CDS  | 4346052 | 4348049 | +                | /                 | transketolase                                           |
| i02_4355  | CDS  | 4348079 | 4348924 | -                | /                 | hypothetical protein                                    |
| i02_4356  | CDS  | 4349125 | 4350030 | -                | /                 | hypothetical protein                                    |
| i02_4357  | CDS  | 4350108 | 4351331 | -                | /                 | putative permease                                       |
| i02_4358  | CDS  | 4351357 | 4351746 | -                | /                 | hypothetical protein                                    |
| i02_4359  | CDS  | 4351763 | 4352719 | -                | /                 | carbamate kinase                                        |
| i02_4360  | CDS  | 4352712 | 4354187 | -                | /                 | hypothetical protein                                    |
| i02_4361  | CDS  | 4354133 | 4355692 | -                | /                 | hypothetical protein                                    |
| i02_4362  | CDS  | 4355787 | 4356647 | -                | /                 | hypothetical protein                                    |
| i02_4363  | CDS  | 4356653 | 4357321 | -                | /                 | hypothetical protein                                    |
| i02_4364  | CDS  | 4357287 | 4357436 | -                | /                 | hypothetical protein                                    |
| i02_4365  | CDS  | 4357431 | 4357547 | +                | /                 | hypothetical protein                                    |
| i02_4366  | CDS  | 4357578 | 4358453 | -                | /                 | putative carboxymethylenebutenolidase                   |
| i02_4367  | CDS  | 4358649 | 4359413 | +                | udp               | uridine phosphorylase                                   |
| i02_4368  | CDS  | 4359448 | 4360938 | -                | /                 | hypothetical protein                                    |
| i02_4369  | CDS  | 4360951 | 4361460 | -                | /                 | hypothetical protein                                    |
| i02_4370  | CDS  | 4361474 | 4362448 | -                | /                 | hypothetical protein                                    |
| i02_4371  | CDS  | 4362473 | 4363102 | -                | /                 | 2-dehydro-3-deoxy-6-phosphogalactonate aldolase         |
| i02_4372  | CDS  | 4362609 | 4363133 | +                | /                 | putative aldolase                                       |
| i02_4373  | CDS  | 4363092 | 4364096 | -                | /                 | hypothetical protein                                    |
| i02_4374  | CDS  | 4364120 | 4364974 | -                | /                 | putative transcriptional regulator                      |
| i02_4375  | CDS  | 4365107 | 4366531 | +                | yigN              | DNA recombination protein RmuC                          |
| i02_4376  | CDS  | 4366626 | 4367381 | +                | ubiE              | ubiquinone/menaquinone biosynthesis protein             |
| i02_4377  | CDS  | 4367350 | 4368000 | +                | yigP              | hypothetical protein                                    |
| i02_4378  | CDS  | 4367997 | 4369637 | +                | ubiB              | putative ubiquinone biosynthesis protein UbiB           |
| i02_4379  | CDS  | 4369674 | 4369985 | +                | tatA              | twin arginine translocase protein A                     |
| i02_4380  | CDS  | 4369989 | 4370504 | +                | /                 | sec-independent translocase                             |
| i02_4381  | CDS  | 4370507 | 4371283 | +                | yigU              | twin-arginine protein translocation system              |
| i02_4382  | CDS  | 4371313 | 4372107 | +                | yigW              | DNase TatD                                              |
| i02_4383  | CDS  | 4372104 | 4372592 | -                | rfaH              | transcriptional activator RfaH                          |
| i02_4384  | CDS  | 4372759 | 4374252 | +                | yigC              | 3-octaprenyl-4-hydroxybenzoate decarboxylase            |
| i02_4385  | CDS  | 4374298 | 4374999 | +                | fre               | FMN reductase                                           |
| i02_4386  | CDS  | 4375191 | 4376354 | -                | fadA              | 3-ketoacyl-CoA thiolase                                 |
| i02_4387  | CDS  | 4376364 | 4378679 | -                | fadB              | multifunctional fatty acid oxidation complex            |
| i02_4388  | CDS  | 4378743 | 4380074 | +                | pepQ              | proline dipeptidase                                     |
| i02_4389  | CDS  | 4380071 | 4380688 | +                | yigZ              | hypothetical protein                                    |
| i02_4390  | CDS  | 4380727 | 4382178 | +                | trkH              | potassium transporter                                   |
| i02_4391  | CDS  | 4382190 | 4382735 | +                | hemG              | protoporphyrinogen oxidase                              |
| i02_4393  | CDS  | 4388228 | 4388755 | -                | mobB              | molybdopterin-guanine dinucleotide biosynthesis protien |
| i02_4394  | CDS  | 4388737 | 4389321 | -                | mobA              | molybdopterin-guanine dinucleotide biosynthesis protien |
| i02_4395  | CDS  | 4389361 | 4389660 | +                | yihD              | hypothetical protein                                    |
| i02_4396  | CDS  | 4389737 | 4390723 | +                | yihE              | serine/threonine protein kinase                         |
| i02_4397  | CDS  | 4390740 | 4391366 | +                | dsbA              | periplasmic protein disulfide isomerase I               |
| i02_4398  | CDS  | 4391391 | 4391531 | +                | /                 | hypothetical protein                                    |
| i02_4399  | CDS  | 4391479 | 4392951 | +                | yihF              | hypothetical protein                                    |
| i02_4400  | CDS  | 4392992 | 4393924 | -                | yihG              | putative acyltransferase                                |
| i02_4401  | CDS  | 4394044 | 4394286 | -                | /                 | hypothetical protein                                    |
| i02_4402  | CDS  | 4394288 | 4397074 | +                | xni               | exonuclease IX                                          |
| i02_4403  | CDS  | 4397293 | 4397442 | -                | /                 | hypothetical protein                                    |
| i02_4404  | CDS  | 4397456 | 4398103 | -                | engB              | ribosome biogenesis GTP-binding protein YsxC            |
| i02_4405  | CDS  | 4398107 | 4398247 | -                | /                 | hypothetical protein                                    |

| Locus_tag | Type   | start   | End     | +/- <sup>a</sup> | Gene <sup>b</sup> | Product                                      |
|-----------|--------|---------|---------|------------------|-------------------|----------------------------------------------|
| i02_4406  | CDS    | 4398555 | 4398701 | -                | /                 | hypothetical protein                         |
| i02_4407  | CDS    | 4398670 | 4399179 | +                | yihI              | hypothetical protein                         |
| i02_4408  | CDS    | 4399253 | 4399369 | -                | /                 | predicted protein                            |
| i02_4409  | CDS    | 4399362 | 4400741 | +                | hemN              | coproporphyrinogen III oxidase               |
| i02_4410  | CDS    | 4401196 | 4402605 | -                | glnG              | nitrogen regulation protein NR(I)            |
| i02_4411  | CDS    | 4402617 | 4403666 | -                | glnL              | nitrogen regulation protein NR(II)           |
| i02_4412  | CDS    | 4403840 | 4405249 | -                | glnA              | glutamine synthetase                         |
| i02_4413  | CDS    | 4405622 | 4407445 | +                | yihK              | GTP-binding protein                          |
| i02_4414  | CDS    | 4407663 | 4408373 | +                | yihL              | putative transcriptional regulator YihL      |
| i02_4415  | CDS    | 4408381 | 4409361 | +                | yihM              | hypothetical protein                         |
| i02_4416  | CDS    | 4409463 | 4410728 | +                | yihN              | hypothetical protein                         |
| i02_4417  | CDS    | 4410788 | 4411576 | -                | yihW              | putative transcriptional regulator YihW      |
| i02_4418  | CDS    | 4411616 | 4412563 | -                | yihV              | putative sugar kinase yihV                   |
| i02_4419  | CDS    | 4412484 | 4413563 | +                | yihU              | oxidoreductase yihU                          |
| i02_4421  | CDS    | 4413588 | 4414475 | +                | yihT              | hypothetical protein                         |
| i02_4422  | CDS    | 4414508 | 4415518 | +                | /                 | putative dehydrogenase                       |
| i02_4423  | CDS    | 4415588 | 4417021 | +                | /                 | hypothetical protein                         |
| i02_4424  | CDS    | 4417120 | 4418469 | +                | /                 | shikimate transporter                        |
| i02_4425  | CDS    | 4418402 | 4419346 | +                | /                 | hypothetical protein                         |
| i02_4426  | CDS    | 4419466 | 4420086 | +                | yihX              | phosphatase                                  |
| i02_4427  | CDS    | 4420080 | 4420952 | +                | rbn               | ribonuclease BN                              |
| i02_4428  | CDS    | 4420949 | 4421386 | +                | yihZ              | D-tyrosyl-tRNA(Tyr) deacylase                |
| i02_4429  | CDS    | 4421383 | 4422372 | +                | yiiD              | hypothetical protein                         |
| i02_4430  | CDS    | 4422436 | 4423356 | -                | /                 | putative lipase                              |
| i02_4431  | CDS    | 4423217 | 4423420 | -                | /                 | putative lipase                              |
| i02_4432  | CDS    | 4423574 | 4423885 | +                | /                 | hypothetical protein                         |
| i02_4433  | CDS    | 4423886 | 4424176 | +                | /                 | hypothetical protein                         |
| i02_4434  | CDS    | 4424535 | 4424813 | +                | /                 | hypothetical protein                         |
| i02_4435  | CDS    | 4425182 | 4425427 | +                | yiiE              | hypothetical protein                         |
| i02_4436  | CDS    | 4425643 | 4426572 | -                | fdhE              | formate dehydrogenase accessory protein FdhE |
| i02_4437  | CDS    | 4426569 | 4427204 | -                | fdol              | formate dehydrogenase-O subunit gamma        |
| i02_4438  | CDS    | 4427201 | 4428103 | -                | fdoH              | formate dehydrogenase-O beta subunit         |
| i02_4439  | pseudo | 4428116 | 4431166 | -                | fdoG              | formate dehydrogenase-O, major subunit       |
| i02_4440  | CDS    | 4430798 | 4431424 | +                | /                 | hypothetical protein                         |
| i02_4441  | CDS    | 4431381 | 4432193 | +                | fdhD              | formate dehydrogenase accessory protein      |
| i02_4442  | CDS    | 4432281 | 4432835 | +                | /                 | hypothetical protein                         |
| i02_4443  | CDS    | 4433189 | 4434562 | +                | /                 | putative glycoporin                          |
| i02_4444  | CDS    | 4434603 | 4434917 | -                | yiiL              | hypothetical protein                         |
| i02_4445  | CDS    | 4434927 | 4435844 | -                | rhaD              | rhamnulose-1-phosphate aldolase              |
| i02_4446  | CDS    | 4436212 | 4437477 | -                | rhaA              | L-rhamnose isomerase                         |
| i02_4447  | CDS    | 4437468 | 4438937 | -                | rhaB              | rhamnulokinase                               |
| i02_4448  | CDS    | 4439016 | 4439165 | +                | /                 | hypothetical protein                         |
| i02_4449  | CDS    | 4439225 | 4440061 | +                | rhaS              | transcriptional activator RhaS               |
| i02_4450  | CDS    | 4440024 | 4440983 | +                | rhaR              | transcriptional activator RhaR               |
| i02_4451  | CDS    | 4440980 | 4442014 | -                | rhaT              | rhamnose-proton symporter                    |
| i02_4452  | CDS    | 4441979 | 4442146 | +                | /                 | hypothetical protein                         |
| i02_4453  | CDS    | 4442294 | 4442920 | +                | sodA              | superoxide dismutase                         |
| i02_4454  | CDS    | 4442949 | 4443077 | -                | /                 | hypothetical protein                         |
| i02_4455  | CDS    | 4443180 | 4444163 | +                | kdgT              | 2-keto-3-deoxygluconate permease             |
| i02_4456  | CDS    | 4444297 | 4444986 | +                | yiiM              | hypothetical protein                         |
| i02_4457  | CDS    | 4445092 | 4446465 | -                | cpxA              | two-component sensor protein                 |
| i02_4458  | CDS    | 4446462 | 4447160 | -                | cpxR              | DNA-binding transcriptional regulator CpxR   |
| i02_4459  | CDS    | 4447307 | 4447810 | +                | cpxP              | periplasmic repressor CpxP                   |
| i02_4460  | CDS    | 4447959 | 4448861 | +                | fieF              | ferrous iron efflux protein F                |
| i02_4461  | CDS    | 4448946 | 4450004 | +                | pfkA              | 6-phosphofructokinase                        |
| i02_4462  | CDS    | 4450324 | 4451313 | +                | sbp               | sulfate transporter subunit                  |
| i02_4463  | CDS    | 4451228 | 4452175 | +                | cdh               | CDP-diacylglycerol pyrophosphatase           |
| i02_4464  | CDS    | 4452230 | 4452997 | -                | tpiA              | triosephosphate isomerase                    |

| Locus_tag | Type | start   | End     | +/- <sup>a</sup> | Gene <sup>b</sup> | Product                                         |
|-----------|------|---------|---------|------------------|-------------------|-------------------------------------------------|
| i02_4465  | CDS  | 4453105 | 4453704 | -                | yiiQ              | hypothetical protein                            |
| i02_4466  | CDS  | 4453805 | 4454245 | +                | yiiR              | hypothetical protein                            |
| i02_4467  | CDS  | 4454457 | 4454756 | +                | yiiS              | hypothetical protein                            |
| i02_4468  | CDS  | 4454783 | 4455211 | +                | yiiT              | universal stress protein UspD                   |
| i02_4469  | CDS  | 4455216 | 4455962 | -                | fpr               | ferredoxin-NADP reductase                       |
| i02_4470  | CDS  | 4456059 | 4457069 | -                | glpX              | fructose 1,6-bisphosphatase II                  |
| i02_4471  | CDS  | 4457240 | 4458853 | -                | glpK              | glycerol kinase                                 |
| i02_4472  | CDS  | 4458771 | 4459616 | -                | glpF              | glycerol uptake facilitator protein             |
| i02_4473  | CDS  | 4460023 | 4460286 | +                | yiiU              | hypothetical protein                            |
| i02_4474  | CDS  | 4460371 | 4460856 | -                | menG              | ribonuclease activity regulator protein RraA    |
| i02_4475  | CDS  | 4460949 | 4461887 | -                | menA              | 1,4-dihydroxy-2-naphthoate                      |
| i02_4476  | CDS  | 4461942 | 4463273 | -                | hslU              | ATP-dependent protease ATP-binding subunit HslU |
| i02_4477  | CDS  | 4463283 | 4463813 | -                | hslV              | ATP-dependent protease peptidase subunit        |
| i02_4478  | CDS  | 4463906 | 4464865 | -                | ftsN              | essential cell division protein FtsN            |
| i02_4479  | CDS  | 4464957 | 4465988 | -                | cytR              | DNA-binding transcriptional regulator CytR      |
| i02_4480  | CDS  | 4466138 | 4468408 | -                | priA              | primosome assembly protein PriA                 |
| i02_4481  | CDS  | 4468521 | 4468661 | -                | /                 | hypothetical protein                            |
| i02_4482  | CDS  | 4468812 | 4469378 | -                | yiiX              | putative peptidoglycan peptidase                |
| i02_4483  | CDS  | 4469480 | 4469935 | -                | metJ              | transcriptional repressor protein MetJ          |
| i02_4484  | CDS  | 4469960 | 4471234 | +                | metB              | cystathionine gamma-synthase                    |
| i02_4485  | CDS  | 4471237 | 4473669 | +                | metL              | bifunctional aspartate kinase II/homoserine     |
| i02_4486  | CDS  | 4473887 | 4474747 | -                | /                 | nucleoside-specific channel-forming protein tsx |
| i02_4487  | CDS  | 4474824 | 4476449 | -                | /                 | hypothetical protein                            |
| i02_4488  | CDS  | 4476484 | 4478037 | -                | /                 | hypothetical protein                            |
| i02_4489  | CDS  | 4478267 | 4479391 | -                | /                 | hypothetical protein                            |
| i02_4490  | CDS  | 4479518 | 4481077 | +                | /                 | hypothetical protein                            |
| i02_4491  | CDS  | 4481459 | 4482349 | +                | metF              | 5,10-methylenetetrahydrofolate reductase        |
| i02_4492  | CDS  | 4482639 | 4484858 | +                | katG              | peroxidase/catalase HPI                         |
| i02_4493  | CDS  | 4484886 | 4485857 | +                | yijE              | putative transport protein YijE                 |
| i02_4494  | CDS  | 4485884 | 4486501 | -                | yijF              | hypothetical protein                            |
| i02_4495  | CDS  | 4486401 | 4486595 | -                | /                 | hypothetical protein                            |
| i02_4496  | CDS  | 4486777 | 4487919 | -                | gldA              | glycerol dehydrogenase                          |
| i02_4497  | CDS  | 4487891 | 4488553 | -                | talC              | fructose-6-phosphate aldolase                   |
| i02_4498  | CDS  | 4488565 | 4491066 | -                | ptsA              | phosphoenolpyruvate-protein phosphotransferase  |
| i02_4499  | CDS  | 4491375 | 4492454 | +                | frwC              | putative fructose-like permease EIIC subunit 2  |
| i02_4500  | CDS  | 4492469 | 4492789 | +                | frwB              | putative fructose-like phosphotransferase EIIB  |
| i02_4501  | CDS  | 4492840 | 4495137 | +                | pflD              | putative formate acetyltransferase 2            |
| i02_4502  | CDS  | 4495034 | 4495981 | +                | pflC              | pyruvate formate lyase II activase              |
| i02_4503  | CDS  | 4495983 | 4496324 | +                | frwD              | putative fructose-like phosphotransferase EIIB  |
| i02_4504  | CDS  | 4496311 | 4497162 | -                | yijO              | putative transcriptional regulator YijO         |
| i02_4505  | CDS  | 4497388 | 4499121 | -                | yijP              | hypothetical protein                            |
| i02_4506  | CDS  | 4499304 | 4501955 | -                | ppc               | phosphoenolpyruvate carboxylase                 |
| i02_4507  | CDS  | 4502257 | 4503447 | -                | argE              | acetylornithine deacetylase                     |
| i02_4508  | CDS  | 4503562 | 4504566 | +                | argC              | N-acetyl-gamma-glutamyl-phosphate reductase     |
| i02_4509  | CDS  | 4504541 | 4505350 | +                | argB              | acetylglutamate kinase                          |
| i02_4510  | CDS  | 4505411 | 4506784 | +                | argH              | argininosuccinate lyase                         |
| i02_4511  | CDS  | 4507222 | 4508496 | +                | /                 | starvation sensing protein rspA                 |
| i02_4512  | CDS  | 4508563 | 4509846 | +                | yjiZ              | putative transport protein YjiL                 |
| i02_4513  | CDS  | 4510053 | 4511015 | +                | oxyR              | DNA-binding transcriptional regulator OxyR      |
| i02_4514  | CDS  | 4510998 | 4512398 | -                | udhA              | soluble pyridine nucleotide transhydrogenase    |
| i02_4515  | CDS  | 4512728 | 4513894 | +                | /                 | putative hippuricase                            |
| i02_4516  | CDS  | 4513937 | 4515253 | +                | /                 | putative citrate permease                       |
| i02_4517  | CDS  | 4515303 | 4516007 | +                | yijC              | DNA-binding transcriptional repressor FabR      |
| i02_4518  | CDS  | 4516007 | 4516366 | +                | yijD              | hypothetical protein                            |
| i02_4519  | CDS  | 4516406 | 4517506 | -                | trmA              | tRNA (uracil-5-)-methyltransferase              |
| i02_4520  | CDS  | 4517875 | 4519719 | +                | btuB              | vitamin B12/cobalamin outer membrane            |
| i02_4521  | CDS  | 4519664 | 4520521 | +                | murI              | glutamate racemase                              |

| <b>Locus_tag</b> | <b>Type</b> | <b>start</b> | <b>End</b> | <b>+/-<sup>a</sup></b> | <b>Gene<sup>b</sup></b> | <b>Product</b>                                |
|------------------|-------------|--------------|------------|------------------------|-------------------------|-----------------------------------------------|
| i02_4523         | CDS         | 4526133      | 4527161    | +                      | murB                    | UDP-N-acetylenolpyruvoylglucosamine reductase |
| i02_4524         | CDS         | 4527158      | 4528123    | +                      | birA                    | biotin--protein ligase                        |
| i02_4525         | CDS         | 4528152      | 4529123    | -                      | coaA                    | pantothenate kinase                           |
| i02_4526         | CDS         | 4529159      | 4529293    | -                      | /                       | hypothetical protein                          |
| i02_4527         | CDS         | 4530020      | 4531204    | +                      | tuf                     | elongation factor Tu                          |
| i02_4528         | CDS         | 4531434      | 4531817    | +                      | secE                    | preprotein translocase subunit SecE           |
| i02_4529         | CDS         | 4531819      | 4532364    | +                      | nusG                    | transcription antitermination protein NusG    |
| i02_4530         | CDS         | 4532523      | 4532951    | +                      | rplK                    | 50S ribosomal protein L11                     |
| i02_4531         | CDS         | 4532955      | 4533659    | +                      | rplA                    | 50S ribosomal protein L1                      |
| i02_4532         | CDS         | 4533951      | 4534448    | +                      | rplJ                    | 50S ribosomal protein L10                     |
| i02_4533         | CDS         | 4534515      | 4534880    | +                      | rplL                    | 50S ribosomal protein L7/L12                  |
| i02_4534         | CDS         | 4535167      | 4539228    | +                      | rpoB                    | DNA-directed RNA polymerase subunit beta      |
| i02_4535         | CDS         | 4539305      | 4543528    | +                      | rpoC                    | DNA-directed RNA polymerase subunit beta'     |
| i02_4536         | CDS         | 4543770      | 4544903    | -                      | thiH                    | thiamine biosynthesis protein ThiH            |
| i02_4537         | CDS         | 4544900      | 4545670    | -                      | thiG                    | thiazole synthase                             |
| i02_4538         | CDS         | 4545672      | 4545872    | -                      | thiS                    | sulfur carrier protein ThiS                   |
| i02_4539         | CDS         | 4545856      | 4546704    | -                      | thiF                    | thiamine biosynthesis protein ThiF            |
| i02_4540         | CDS         | 4546604      | 4547242    | -                      | thiE                    | thiamine-phosphate pyrophosphorylase          |
| i02_4541         | CDS         | 4547239      | 4549146    | -                      | thiC                    | thiamine biosynthesis protein ThiC            |
| i02_4542         | CDS         | 4549367      | 4549843    | -                      | yjaE                    | anti-RNA polymerase sigma 70 factor           |
| i02_4543         | CDS         | 4549938      | 4550711    | +                      | nudC                    | NADH pyrophosphatase                          |
| i02_4544         | CDS         | 4550751      | 4551815    | +                      | hemE                    | uroporphyrinogen decarboxylase                |
| i02_4545         | CDS         | 4551825      | 4552496    | +                      | nfi                     | endonuclease V                                |
| i02_4546         | CDS         | 4552539      | 4553129    | +                      | yjaG                    | hypothetical protein                          |
| i02_4547         | CDS         | 4553316      | 4553588    | +                      | hupA                    | transcriptional regulator HU subunit alpha    |
| i02_4548         | CDS         | 4553595      | 4554296    | +                      | yjaH                    | hypothetical protein                          |
| i02_4549         | CDS         | 4554298      | 4554858    | -                      | zraP                    | zinc resistance protein                       |
| i02_4551         | CDS         | 4554955      | 4556331    | +                      | hydH                    | sensor protein ZraS                           |
| i02_4552         | CDS         | 4556328      | 4557653    | +                      | hydG                    | transcriptional regulatory protein ZraR       |
| i02_4553         | CDS         | 4557650      | 4558939    | -                      | purD                    | phosphoribosylamine--glycine ligase           |
| i02_4554         | CDS         | 4558951      | 4560540    | -                      | purH                    | bifunctional                                  |
| i02_4555         | CDS         | 4560658      | 4560780    | +                      | /                       | hypothetical protein                          |
| i02_4556         | CDS         | 4560939      | 4561100    | -                      | /                       | hypothetical protein                          |
| i02_4558         | CDS         | 4566208      | 4566627    | +                      | yjaA                    | hypothetical protein                          |
| i02_4559         | CDS         | 4566691      | 4567134    | -                      | yjaB                    | hypothetical protein                          |
| i02_4560         | CDS         | 4567291      | 4568220    | +                      | metA                    | homoserine O-succinyltransferase              |
| i02_4561         | CDS         | 4568471      | 4570090    | +                      | aceB                    | malate synthase                               |
| i02_4562         | CDS         | 4570105      | 4571424    | +                      | aceA                    | isocitrate lyase                              |
| i02_4563         | CDS         | 4571640      | 4573364    | +                      | aceK                    | bifunctional isocitrate dehydrogenase         |
| i02_4564         | CDS         | 4573381      | 4574244    | -                      | iclR                    | transcriptional repressor IclR                |
| i02_4565         | CDS         | 4574390      | 4578088    | +                      | metH                    | B12-dependent methionine synthase             |
| i02_4566         | CDS         | 4578142      | 4578468    | +                      | /                       | hypothetical protein                          |
| i02_4567         | CDS         | 4578511      | 4578960    | +                      | /                       | hypothetical protein                          |
| i02_4568         | CDS         | 4579131      | 4580762    | +                      | yjbB                    | hypothetical protein                          |
| i02_4569         | CDS         | 4580852      | 4581541    | -                      | pepE                    | peptidase E                                   |
| i02_4570         | CDS         | 4581923      | 4583164    | -                      | /                       | putative oxidoreductase                       |
| i02_4571         | CDS         | 4583204      | 4584058    | -                      | /                       | PTS system, mannose-specific IID component    |
| i02_4572         | CDS         | 4584039      | 4584836    | -                      | /                       | PTS system, mannose-specific IIC component    |
| i02_4573         | CDS         | 4584902      | 4585396    | -                      | /                       | putative sorbose PTS component                |
| i02_4574         | CDS         | 4585396      | 4585803    | -                      | /                       | putative sorbose PTS component                |
| i02_4575         | CDS         | 4585813      | 4586619    | -                      | /                       | sorbitol-6-phosphate 2-dehydrogenase          |
| i02_4576         | CDS         | 4586689      | 4587720    | -                      | /                       | putative transcriptional regulator of sorbose |
| i02_4577         | CDS         | 4587984      | 4588856    | +                      | yjbC                    | 23S rRNA pseudouridine synthase F             |
| i02_4578         | CDS         | 4588857      | 4589129    | -                      | yjbD                    | hypothetical protein                          |
| i02_4579         | CDS         | 4589382      | 4590731    | -                      | lysC                    | aspartate kinase III                          |
| i02_4580         | CDS         | 4591256      | 4592905    | +                      | pgi                     | glucose-6-phosphate isomerase                 |
| i02_4581         | CDS         | 4593802      | 4594470    | +                      | yjbF                    | lipoprotein yjbF precursor                    |
| i02_4582         | CDS         | 4594467      | 4595204    | +                      | yjbG                    | hypothetical protein                          |

| Locus_tag | Type | start   | End     | +/- <sup>a</sup> | Gene <sup>b</sup> | Product                                        |
|-----------|------|---------|---------|------------------|-------------------|------------------------------------------------|
| i02_4583  | CDS  | 4595204 | 4597300 | +                | yjbH              | lipoprotein yjbH precursor                     |
| i02_4584  | CDS  | 4597304 | 4597465 | +                | /                 | hypothetical protein                           |
| i02_4585  | CDS  | 4597622 | 4597744 | -                | /                 | hypothetical protein                           |
| i02_4586  | CDS  | 4597840 | 4598250 | +                | yjbA              | phosphate-starvation-inducible protein PsiE    |
| i02_4587  | CDS  | 4598344 | 4599234 | -                | malG              | maltose transporter permease                   |
| i02_4588  | CDS  | 4599249 | 4600808 | -                | malF              | maltose transporter membrane protein           |
| i02_4589  | CDS  | 4600947 | 4602137 | -                | malE              | maltose ABC transporter periplasmic protein    |
| i02_4590  | CDS  | 4602412 | 4603617 | +                | malK              | maltose/maltodextrin transporter               |
| i02_4591  | CDS  | 4603689 | 4605029 | +                | lamB              | maltoporin                                     |
| i02_4592  | CDS  | 4605252 | 4606181 | +                | malM              | maltose regulon periplasmic protein            |
| i02_4593  | CDS  | 4606194 | 4606346 | +                | /                 | hypothetical protein                           |
| i02_4594  | CDS  | 4606360 | 4606857 | +                | ubiC              | chorismate pyruvate lyase                      |
| i02_4595  | CDS  | 4606870 | 4607742 | +                | ubiA              | 4-hydroxybenzoate octaprenyltransferase        |
| i02_4596  | CDS  | 4607897 | 4610380 | -                | plsB              | glycerol-3-phosphate acyltransferase           |
| i02_4597  | CDS  | 4610166 | 4610528 | -                | /                 | hypothetical protein                           |
| i02_4598  | CDS  | 4610491 | 4610859 | +                | dgkA              | diacylglycerol kinase                          |
| i02_4599  | CDS  | 4610969 | 4611577 | +                | lexA              | LexA repressor                                 |
| i02_4600  | CDS  | 4611596 | 4612975 | +                | dinF              | DNA-damage-inducible SOS response protein      |
| i02_4601  | CDS  | 4613085 | 4613300 | +                | yjbJ              | putative stress-response protein               |
| i02_4602  | CDS  | 4613342 | 4614028 | -                | yjbK              | zinc uptake transcriptional repressor          |
| i02_4603  | CDS  | 4614013 | 4615008 | +                | yjbN              | tRNA-dihydrouridine synthase A                 |
| i02_4604  | CDS  | 4614932 | 4615384 | +                | pspG              | phage shock protein G                          |
| i02_4605  | CDS  | 4615549 | 4616532 | -                | qor               | quinone oxidoreductase, NADPH-dependent        |
| i02_4606  | CDS  | 4616638 | 4618773 | -                | /                 | putative oxidoreductase                        |
| i02_4607  | CDS  | 4618676 | 4620076 | -                | /                 | putative transmembrane transport protein       |
| i02_4608  | CDS  | 4620167 | 4620946 | -                | /                 | putative crotonase                             |
| i02_4609  | CDS  | 4620939 | 4622510 | -                | /                 | putative propionate CoA-transferase            |
| i02_4610  | CDS  | 4622739 | 4623800 | +                | /                 | putative regulator                             |
| i02_4611  | CDS  | 4623837 | 4625288 | +                | dnaB              | replicative DNA helicase                       |
| i02_4612  | CDS  | 4625323 | 4626063 | -                | /                 | hypothetical protein                           |
| i02_4613  | CDS  | 4626010 | 4627089 | +                | alr               | alanine racemase                               |
| i02_4614  | CDS  | 4627112 | 4627669 | +                | /                 | putative transporter                           |
| i02_4615  | CDS  | 4627642 | 4628670 | +                | /                 | NadR-like protein                              |
| i02_4616  | CDS  | 4628752 | 4629945 | +                | tyrB              | aromatic amino acid aminotransferase           |
| i02_4617  | CDS  | 4630052 | 4632871 | +                | sucA              | 2-oxoglutarate dehydrogenase E1 component      |
| i02_4618  | CDS  | 4632744 | 4632944 | -                | /                 | hypothetical protein                           |
| i02_4619  | CDS  | 4632904 | 4634058 | +                | /                 | dihydroipoamide succinyltransferase component  |
| i02_4620  | CDS  | 4634120 | 4635487 | +                | /                 | putative 2-oxoglutarate dehydrogenase          |
| i02_4621  | CDS  | 4635509 | 4636678 | +                | /                 | succinyl-CoA synthetase beta chain             |
| i02_4622  | CDS  | 4636691 | 4637563 | +                | /                 | succinyl-CoA synthetase alpha chain            |
| i02_4623  | CDS  | 4637769 | 4639274 | +                | /                 | putative membrane-bound protein                |
| i02_4624  | CDS  | 4639148 | 4640359 | +                | /                 | putative lactate dehydrogenase                 |
| i02_4625  | CDS  | 4640348 | 4641706 | -                | /                 | putative c4-dicarboxylate transport            |
| i02_4626  | CDS  | 4641699 | 4643519 | -                | /                 | putative transport sensor protein              |
| i02_4628  | CDS  | 4643491 | 4643631 | -                | /                 | hypothetical protein                           |
| i02_4629  | CDS  | 4643727 | 4644509 | +                | aphA              | acid phosphatase/phosphotransferase            |
| i02_4630  | CDS  | 4644620 | 4645036 | +                | yjbQ              | hypothetical protein                           |
| i02_4631  | CDS  | 4645040 | 4645396 | +                | yjbR              | hypothetical protein                           |
| i02_4632  | CDS  | 4645431 | 4648253 | -                | uvrA              | excinuclease ABC subunit A                     |
| i02_4633  | CDS  | 4648508 | 4649044 | +                | ssb               | single-stranded DNA-binding protein            |
| i02_4634  | CDS  | 4649143 | 4649523 | -                | yjcB              | hypothetical protein                           |
| i02_4635  | CDS  | 4649511 | 4649645 | +                | /                 | hypothetical protein                           |
| i02_4636  | CDS  | 4649844 | 4651406 | +                | yjcC              | hypothetical protein                           |
| i02_4637  | CDS  | 4651442 | 4651765 | -                | soxS              | DNA-binding transcriptional regulator SoxS     |
| i02_4638  | CDS  | 4651851 | 4652315 | +                | soxR              | redox-sensitive transcriptional activator SoxR |
| i02_4639  | CDS  | 4652695 | 4652919 | +                | /                 | hypothetical protein                           |
| i02_4640  | CDS  | 4652820 | 4654169 | +                | /                 | hypothetical protein                           |
| i02_4641  | CDS  | 4654320 | 4655969 | +                | /                 | putative Na(+)/H(+) exchanger yjcE             |



| <b>Locus_tag</b> | <b>Type</b> | <b>start</b> | <b>End</b> | <b>+/-<sup>a</sup></b> | <b>Gene<sup>b</sup></b> | <b>Product</b>                                   |
|------------------|-------------|--------------|------------|------------------------|-------------------------|--------------------------------------------------|
| i02_4642         | CDS         | 4656005      | 4656889    | -                      | /                       | putative transcriptional regulator               |
| i02_4643         | CDS         | 4656993      | 4657403    | +                      | /                       | hypothetical protein                             |
| i02_4644         | CDS         | 4657396      | 4658085    | +                      | /                       | hypothetical protein                             |
| i02_4645         | CDS         | 4658124      | 4659773    | -                      | actP                    | acetate permease                                 |
| i02_4646         | CDS         | 4659770      | 4660087    | -                      | yjch                    | hypothetical protein                             |
| i02_4647         | CDS         | 4660164      | 4660310    | +                      | /                       | hypothetical protein                             |
| i02_4648         | CDS         | 4660478      | 4662436    | -                      | acs                     | acetyl-CoA synthetase                            |
| i02_4649         | CDS         | 4662710      | 4662907    | +                      | /                       | hypothetical protein                             |
| i02_4650         | CDS         | 4662828      | 4664264    | +                      | nrfA                    | cytochrome c552                                  |
| i02_4651         | CDS         | 4664303      | 4664875    | +                      | nrfB                    | cytochrome c nitrite reductase pentaheme         |
| i02_4652         | CDS         | 4664872      | 4665543    | +                      | nrfC                    | NrfC protein                                     |
| i02_4653         | CDS         | 4665540      | 4666496    | +                      | nrfD                    | NrfD protein                                     |
| i02_4654         | CDS         | 4666552      | 4668234    | +                      | nrfE                    | heme lyase subunit NrfE                          |
| i02_4655         | CDS         | 4668227      | 4668610    | +                      | nrfF                    | formate-dependent nitrite reductase complex      |
| i02_4656         | CDS         | 4668541      | 4669203    | +                      | nrfG                    | formate-dependent nitrite reductase complex      |
| i02_4657         | CDS         | 4669338      | 4669469    | -                      | /                       | hypothetical protein                             |
| i02_4658         | CDS         | 4669546      | 4670859    | +                      | gltP                    | glutamate/aspartate:proton symporter             |
| i02_4659         | CDS         | 4671770      | 4671928    | +                      | /                       | hypothetical protein                             |
| i02_4660         | CDS         | 4671914      | 4672657    | -                      | yjcO                    | hypothetical protein                             |
| i02_4661         | CDS         | 4672714      | 4673418    | -                      | yddO                    | ABC transporter ATP-binding protein              |
| i02_4662         | CDS         | 4673405      | 4674301    | -                      | /                       | putative oligopeptide ABC transporter            |
| i02_4663         | CDS         | 4674234      | 4675067    | -                      | yddQ                    | ABC transporter permease                         |
| i02_4664         | CDS         | 4675067      | 4676209    | -                      | yddR                    | ABC transporter permease                         |
| i02_4665         | CDS         | 4676216      | 4677784    | -                      | /                       | hypothetical protein                             |
| i02_4666         | pseudo      | 4678159      | 4680306    | -                      | fdhF                    | formate dehydrogenase H                          |
| i02_4667         | CDS         | 4679884      | 4680270    | +                      | /                       | hypothetical protein                             |
| i02_4668         | CDS         | 4680514      | 4681980    | -                      | yjcP                    | putative outer membrane efflux protein MdtP      |
| i02_4669         | CDS         | 4681977      | 4684028    | -                      | yjcQ                    | multidrug efflux system protein MdtO             |
| i02_4670         | CDS         | 4684028      | 4685059    | -                      | yjcR                    | multidrug resistance protein MdtN                |
| i02_4671         | CDS         | 4685078      | 4685401    | -                      | /                       | hypothetical protein                             |
| i02_4672         | CDS         | 4685562      | 4687559    | -                      | yjcS                    | hypothetical protein                             |
| i02_4673         | CDS         | 4687820      | 4688749    | -                      | yjcT                    | D-allose kinase                                  |
| i02_4674         | CDS         | 4688733      | 4689434    | -                      | yjcU                    | allulose-6-phosphate 3-epimerase                 |
| i02_4675         | CDS         | 4689439      | 4690419    | -                      | yjcV                    | D-allose transporter subunit                     |
| i02_4676         | CDS         | 4690398      | 4691930    | -                      | yjcW                    | D-allose transporter ATP-binding protein         |
| i02_4677         | CDS         | 4692057      | 4692998    | -                      | yjcX                    | D-allose transporter subunit                     |
| i02_4678         | CDS         | 4693051      | 4693974    | -                      | rpiR                    | DNA-binding transcriptional repressor RpiR       |
| i02_4679         | CDS         | 4694300      | 4694749    | +                      | rpiB                    | ribose-5-phosphate isomerase B                   |
| i02_4680         | CDS         | 4694818      | 4695147    | +                      | /                       | hypothetical protein                             |
| i02_4681         | CDS         | 4695175      | 4695897    | -                      | phnP                    | carbon-phosphorus lyase complex accessory        |
| i02_4682         | CDS         | 4695935      | 4696369    | -                      | phnO                    | aminoalkylphosphonic acid N-acetyltransferase    |
| i02_4683         | CDS         | 4696356      | 4696913    | -                      | phnN                    | ribose 1,5-bisphosphokinase                      |
| i02_4684         | CDS         | 4696913      | 4698049    | -                      | phnM                    | PhnM protein                                     |
| i02_4685         | CDS         | 4698046      | 4698825    | -                      | phnL                    | phosphonate ABC transporter ATP-binding protein  |
| i02_4686         | CDS         | 4698837      | 4699595    | -                      | phnK                    | phosphonate C-P lyase system protein PhnK        |
| i02_4687         | CDS         | 4699592      | 4700521    | -                      | phnJ                    | PhnJ protein                                     |
| i02_4689         | CDS         | 4700430      | 4701500    | -                      | phnI                    | PhnI protein                                     |
| i02_4690         | CDS         | 4701494      | 4702078    | -                      | phnH                    | carbon-phosphorus lyase complex subunit          |
| i02_4691         | CDS         | 4702075      | 4702527    | -                      | phnG                    | PhnG protein                                     |
| i02_4692         | CDS         | 4702528      | 4703262    | -                      | phnF                    | phosphonate metabolism transcriptional regulator |
| i02_4693         | CDS         | 4703274      | 4704116    | -                      | phnE                    | membrane channel protein component of Pn         |
| i02_4694         | CDS         | 4704159      | 4705175    | -                      | phnD                    | phosphonates-binding periplasmic protein         |
| i02_4695         | CDS         | 4705200      | 4705988    | -                      | phnC                    | phosphonate/organophosphate ester transporter    |
| i02_4696         | CDS         | 4706121      | 4706564    | -                      | phnB                    | hypothetical protein                             |
| i02_4698         | CDS         | 4706724      | 4707206    | -                      | phnA                    | PhnA protein                                     |
| i02_4699         | CDS         | 4707462      | 4709690    | +                      | yjdA                    | hypothetical protein                             |
| i02_4700         | CDS         | 4709687      | 4710565    | +                      | yjcZ                    | hypothetical protein                             |
| i02_4701         | CDS         | 4710796      | 4712331    | +                      | proP                    | proline/glycine betaine transporter              |

| Locus_tag | Type | start   | End     | +/- <sup>a</sup> | Gene <sup>b</sup> | Product                                       |
|-----------|------|---------|---------|------------------|-------------------|-----------------------------------------------|
| i02_4702  | CDS  | 4712508 | 4713608 | -                | basS              | sensor protein BasS/PmrB                      |
| i02_4703  | CDS  | 4713609 | 4714277 | -                | basR              | DNA-binding transcriptional regulator BasR    |
| i02_4704  | CDS  | 4714274 | 4715947 | -                | yjdB              | putative cell division protein                |
| i02_4705  | CDS  | 4716021 | 4717358 | -                | yjdB              | arginine:agmatin antiporter                   |
| i02_4706  | CDS  | 4717495 | 4718256 | -                | adiY              | putative regulatory protein adiY              |
| i02_4707  | CDS  | 4718592 | 4720862 | -                | adiA              | biodegradative arginine decarboxylase         |
| i02_4708  | CDS  | 4721058 | 4721966 | -                | melR              | DNA-binding transcriptional regulator MelR    |
| i02_4709  | CDS  | 4722249 | 4723604 | +                | mela              | alpha-galactosidase                           |
| i02_4710  | CDS  | 4723601 | 4723882 | -                | /                 | membrane protein                              |
| i02_4711  | CDS  | 4723863 | 4724243 | -                | yjdB              | hypothetical protein                          |
| i02_4712  | CDS  | 4724366 | 4726012 | -                | fumB              | fumarate hydratase class I, anaerobic         |
| i02_4713  | CDS  | 4726090 | 4727430 | -                | dcuB              | anaerobic C4-dicarboxylate transporter        |
| i02_4714  | CDS  | 4727498 | 4727656 | +                | /                 | hypothetical protein                          |
| i02_4715  | CDS  | 4728001 | 4728720 | -                | yjdB              | DNA-binding transcriptional activator DcuR    |
| i02_4716  | CDS  | 4728717 | 4730348 | -                | yjdB              | sensory histidine kinase DcuS                 |
| i02_4717  | CDS  | 4730340 | 4730474 | +                | /                 | hypothetical protein                          |
| i02_4718  | CDS  | 4730529 | 4730759 | +                | yjdB              | hypothetical protein                          |
| i02_4719  | CDS  | 4730800 | 4731252 | -                | /                 | hypothetical protein                          |
| i02_4720  | CDS  | 4731272 | 4731568 | +                | yjdB              | hypothetical protein                          |
| i02_4721  | CDS  | 4731596 | 4731769 | +                | /                 | hypothetical protein                          |
| i02_4722  | CDS  | 4731785 | 4731922 | +                | /                 | hypothetical protein                          |
| i02_4723  | CDS  | 4731888 | 4733405 | -                | lysS              | lysyl-tRNA synthetase                         |
| i02_4724  | CDS  | 4733642 | 4735099 | -                | yjdB              | putative transporter YjdB                     |
| i02_4725  | CDS  | 4735158 | 4737344 | -                | cadA              | lysine decarboxylase                          |
| i02_4726  | CDS  | 4737385 | 4738719 | -                | cadB              | lysine/cadaverine antiporter                  |
| i02_4727  | CDS  | 4739085 | 4740623 | -                | cadC              | DNA-binding transcriptional activator CadC    |
| i02_4728  | CDS  | 4741422 | 4742021 | -                | yjdB              | putative transcriptional regulator            |
| i02_4729  | CDS  | 4742034 | 4743812 | -                | dipZ              | thiol:disulfide interchange protein precursor |
| i02_4730  | CDS  | 4743707 | 4744045 | -                | cutA              | divalent-cation tolerance protein CutA        |
| i02_4731  | CDS  | 4744161 | 4745462 | -                | dcuA              | anaerobic C4-dicarboxylate transporter        |
| i02_4732  | CDS  | 4745580 | 4747061 | -                | aspA              | aspartate ammonia-lyase                       |
| i02_4733  | CDS  | 4747353 | 4747829 | +                | fxsA              | FxsA                                          |
| i02_4734  | CDS  | 4747845 | 4749161 | -                | yjeH              | inner membrane protein YjeH                   |
| i02_4735  | CDS  | 4749244 | 4749567 | -                | /                 | hypothetical protein                          |
| i02_4736  | CDS  | 4749377 | 4749670 | +                | groES             | co-chaperonin GroES                           |
| i02_4737  | CDS  | 4749714 | 4751360 | +                | groEL             | chaperonin GroEL                              |
| i02_4738  | CDS  | 4751465 | 4751851 | +                | yjeI              | hypothetical protein                          |
| i02_4739  | CDS  | 4751901 | 4752770 | -                | yjeJ              | hypothetical protein                          |
| i02_4740  | CDS  | 4753005 | 4754033 | -                | yjeK              | hypothetical protein                          |
| i02_4741  | CDS  | 4754075 | 4754641 | +                | efp               | elongation factor P                           |
| i02_4742  | CDS  | 4754693 | 4754818 | +                | ecnA              | entericidin A                                 |
| i02_4743  | CDS  | 4754929 | 4755075 | +                | ecnB              | entericidin B membrane lipoprotein            |
| i02_4744  | CDS  | 4755101 | 4755568 | +                | sugE              | SugE protein                                  |
| i02_4745  | CDS  | 4755565 | 4756098 | -                | blc               | outer membrane lipoprotein Blc                |
| i02_4746  | CDS  | 4756187 | 4757449 | -                | ampC              | beta-lactamase                                |
| i02_4747  | CDS  | 4757383 | 4757772 | -                | frdD              | fumarate reductase subunit D                  |
| i02_4748  | CDS  | 4757753 | 4758148 | -                | frdC              | fumarate reductase subunit C                  |
| i02_4749  | CDS  | 4758159 | 4758893 | -                | frdB              | fumarate reductase iron-sulfur subunit        |
| i02_4750  | CDS  | 4758886 | 4760694 | -                | frdA              | fumarate reductase flavoprotein subunit       |
| i02_4751  | CDS  | 4760989 | 4761996 | +                | yjeA              | lysyl-tRNA synthetase                         |
| i02_4752  | CDS  | 4762173 | 4763717 | +                | yjeM              | putative transporter YjeM                     |
| i02_4753  | CDS  | 4763868 | 4767191 | -                | yjeP              | hypothetical protein                          |
| i02_4754  | CDS  | 4767111 | 4768136 | +                | /                 | hypothetical protein                          |
| i02_4755  | CDS  | 4767213 | 4768181 | -                | psd               | phosphatidylserine decarboxylase              |
| i02_4756  | CDS  | 4768278 | 4769330 | -                | yjeQ              | ribosome-associated GTPase                    |
| i02_4757  | CDS  | 4769425 | 4769970 | +                | yjeR              | oligoribonuclease                             |
| i02_4758  | CDS  | 4770749 | 4771954 | -                | yjeS              | putative electron transport protein yjeS      |
| i02_4759  | CDS  | 4771866 | 4773434 | +                | yjeF              | hypothetical protein                          |

| <b>Locus_tag</b> | <b>Type</b> | <b>start</b> | <b>End</b> | <b>+/-<sup>a</sup></b> | <b>Gene<sup>b</sup></b> | <b>Product</b>                                  |
|------------------|-------------|--------------|------------|------------------------|-------------------------|-------------------------------------------------|
| i02_4760         | CDS         | 4773406      | 4773867    | +                      | yjeE                    | putative ATPase                                 |
| i02_4761         | CDS         | 4773871      | 4775217    | +                      | amiB                    | N-acetylmuramoyl-L-alanine amidase II           |
| i02_4762         | CDS         | 4775224      | 4777074    | +                      | mutL                    | DNA mismatch repair protein                     |
| i02_4763         | CDS         | 4777067      | 4778017    | +                      | miaA                    | tRNA dimethylallyltransferase                   |
| i02_4764         | CDS         | 4778103      | 4778411    | +                      | hfq                     | RNA-binding protein Hfq                         |
| i02_4765         | CDS         | 4778487      | 4779767    | +                      | hflX                    | putative GTPase HflX                            |
| i02_4766         | CDS         | 4779853      | 4781112    | +                      | hflK                    | FtsH protease regulator HflK                    |
| i02_4767         | CDS         | 4781115      | 4782119    | +                      | hflC                    | FtsH protease regulator HflC                    |
| i02_4768         | CDS         | 4782201      | 4782398    | +                      | yjeT                    | hypothetical protein                            |
| i02_4769         | CDS         | 4782502      | 4783800    | +                      | purA                    | adenylosuccinate synthetase                     |
| i02_4770         | CDS         | 4784005      | 4784430    | +                      | yjeB                    | transcriptional repressor NsrR                  |
| i02_4771         | CDS         | 4784427      | 4786910    | +                      | vacB                    | exoribonuclease R                               |
| i02_4772         | CDS         | 4787001      | 4787732    | +                      | yjfH                    | 23S rRNA (guanosine-2'-O-)-methyltransferase    |
| i02_4773         | CDS         | 4787859      | 4788260    | +                      | yjfl                    | hypothetical protein                            |
| i02_4774         | CDS         | 4788279      | 4788977    | +                      | yjfJ                    | hypothetical protein                            |
| i02_4775         | CDS         | 4789027      | 4789686    | +                      | yjfK                    | hypothetical protein                            |
| i02_4776         | CDS         | 4789623      | 4790102    | +                      | yjfL                    | hypothetical protein                            |
| i02_4777         | CDS         | 4790112      | 4790750    | +                      | yjfM                    | hypothetical protein                            |
| i02_4778         | CDS         | 4790753      | 4791916    | +                      | yjfC                    | hypothetical protein                            |
| i02_4779         | CDS         | 4791982      | 4793625    | +                      | aidB                    | isovaleryl CoA dehydrogenase                    |
| i02_4780         | CDS         | 4793742      | 4794044    | -                      | yjfN                    | hypothetical protein                            |
| i02_4781         | CDS         | 4794166      | 4794594    | -                      | yjfO                    | hypothetical protein                            |
| i02_4782         | CDS         | 4794677      | 4795426    | +                      | yjfP                    | esterase                                        |
| i02_4783         | CDS         | 4795423      | 4796178    | -                      | yjfQ                    | transcriptional repressor UlaR                  |
| i02_4784         | CDS         | 4796286      | 4797356    | -                      | yjfR                    | putative L-ascorbate 6-phosphate lactonase      |
| i02_4785         | CDS         | 4797705      | 4799102    | +                      | ulaA                    | ascorbate-specific PTS system enzyme IIC        |
| i02_4786         | CDS         | 4799112      | 4799423    | +                      | sgaB                    | L-ascorbate-specific enzyme IIB component       |
| i02_4787         | CDS         | 4799433      | 4799897    | +                      | ptxA                    | L-ascorbate-specific enzyme IIA component       |
| i02_4788         | CDS         | 4799911      | 4800561    | +                      | ulaD                    | 3-keto-L-gulonate-6-phosphate decarboxylase     |
| i02_4789         | CDS         | 4800571      | 4801425    | +                      | sgaU                    | L-xylulose 5-phosphate 3-epimerase              |
| i02_4790         | CDS         | 4801425      | 4802111    | +                      | sgaE                    | L-ribulose-5-phosphate 4-epimerase              |
| i02_4791         | CDS         | 4802240      | 4802515    | -                      | yjfY                    | hypothetical protein                            |
| i02_4792         | CDS         | 4802843      | 4803238    | +                      | rpsF                    | 30S ribosomal protein S6                        |
| i02_4793         | CDS         | 4803245      | 4803559    | +                      | priB                    | primosomal replication protein N                |
| i02_4794         | CDS         | 4803564      | 4803791    | +                      | rpsR                    | 30S ribosomal protein S18                       |
| i02_4795         | CDS         | 4803833      | 4804282    | +                      | rplI                    | 50S ribosomal protein L9                        |
| i02_4796         | CDS         | 4804684      | 4805175    | +                      | /                       | hypothetical protein                            |
| i02_4797         | CDS         | 4805178      | 4805765    | +                      | /                       | hypothetical protein                            |
| i02_4799         | CDS         | 4805836      | 4806447    | +                      | /                       | hypothetical protein                            |
| i02_4800         | CDS         | 4806590      | 4807867    | -                      | /                       | hexuronate transporter                          |
| i02_4801         | CDS         | 4807960      | 4810032    | -                      | /                       | putative oxidoreductase                         |
| i02_4802         | CDS         | 4810029      | 4811570    | -                      | /                       | putative acetyl-CoA:acetoacetyl-CoA transferase |
| i02_4803         | CDS         | 4811580      | 4812356    | -                      | /                       | hypothetical protein                            |
| i02_4805         | CDS         | 4812366      | 4813208    | -                      | /                       | hypothetical protein                            |
| i02_4806         | CDS         | 4813218      | 4814009    | -                      | fabG                    | 3-ketoacyl-(acyl-carrier-protein) reductase     |
| i02_4807         | CDS         | 4814150      | 4814869    | +                      | /                       | hypothetical protein                            |
| i02_4808         | CDS         | 4814853      | 4815527    | -                      | ytfB                    | hypothetical protein                            |
| i02_4809         | CDS         | 4815550      | 4816329    | +                      | fkfB                    | peptidyl-prolyl cis-trans isomerase             |
| i02_4810         | CDS         | 4816639      | 4818051    | +                      | cycA                    | D-alanine/D-serine/glycine permease             |
| i02_4811         | CDS         | 4818096      | 4818758    | -                      | ytfE                    | iron-sulfur cluster repair di-iron protein      |
| i02_4812         | CDS         | 4818866      | 4819840    | -                      | ytfF                    | hypothetical protein                            |
| i02_4813         | CDS         | 4819939      | 4820799    | -                      | ytfG                    | hypothetical protein                            |
| i02_4814         | CDS         | 4820777      | 4821268    | +                      | ytfH                    | hypothetical protein                            |
| i02_4815         | CDS         | 4821397      | 4823349    | -                      | /                       | hypothetical protein                            |
| i02_4816         | CDS         | 4823530      | 4824270    | +                      | cysQ                    | adenosine-3'(2'),5'-bisphosphate nucleotidase   |
| i02_4817         | CDS         | 4824260      | 4824817    | -                      | /                       | hypothetical protein                            |
| i02_4818         | CDS         | 4825076      | 4825348    | +                      | ytfK                    | hypothetical protein                            |
| i02_4819         | CDS         | 4825426      | 4826769    | -                      | ytfL                    | hypothetical protein                            |

| Locus_tag | Type | start   | End     | +/- <sup>a</sup> | Gene <sup>b</sup> | Product                                                                    |
|-----------|------|---------|---------|------------------|-------------------|----------------------------------------------------------------------------|
| i02_4820  | CDS  | 4827092 | 4827796 | -                | msrA              | methionine sulfoxide reductase A                                           |
| i02_4821  | CDS  | 4827936 | 4829669 | +                | ytfM              | hypothetical protein                                                       |
| i02_4822  | CDS  | 4829666 | 4833445 | +                | ytfN              | hypothetical protein                                                       |
| i02_4823  | CDS  | 4833448 | 4833789 | +                | ytfP              | hypothetical protein                                                       |
| i02_4824  | CDS  | 4833939 | 4835411 | +                | /                 | hypothetical protein                                                       |
| i02_4825  | CDS  | 4835474 | 4835614 | -                | /                 | hypothetical protein                                                       |
| i02_4826  | CDS  | 4835825 | 4836355 | -                | ppa               | inorganic pyrophosphatase                                                  |
| i02_4827  | CDS  | 4836367 | 4836492 | -                | /                 | hypothetical protein                                                       |
| i02_4828  | CDS  | 4836665 | 4837621 | +                | ytfQ              | ABC transporter periplasmic-binding protein                                |
| i02_4829  | CDS  | 4837761 | 4839263 | +                | ytfR              | ABC transporter ATP-binding protein                                        |
| i02_4830  | CDS  | 4839253 | 4840299 | +                | ytfT              | ABC transporter permease                                                   |
| i02_4831  | CDS  | 4840286 | 4841281 | +                | yjfF              | inner membrane ABC transporter permease protein                            |
| i02_4832  | CDS  | 4841314 | 4842375 | -                | fbp               | fructose-1,6-bisphosphatase                                                |
| i02_4833  | CDS  | 4842375 | 4842506 | +                | /                 | hypothetical protein                                                       |
| i02_4834  | CDS  | 4842488 | 4843861 | +                | yjfG              | UDP-N-acetylmuramate:L-alanyl-gamma-D-glutamyl-meso-diaminopimelate ligase |
| i02_4835  | CDS  | 4844019 | 4844570 | -                | yjgA              | hypothetical protein                                                       |
| i02_4836  | CDS  | 4844664 | 4846016 | +                | pmbA              | peptidase PmbA                                                             |
| i02_4837  | CDS  | 4846055 | 4846465 | -                | /                 | hypothetical protein                                                       |
| i02_4838  | CDS  | 4846209 | 4846586 | +                | cybC              | soluble cytochrome b562 precursor                                          |
| i02_4839  | CDS  | 4846631 | 4847095 | -                | nrdG              | anaerobic ribonucleotide reductase-activating                              |
| i02_4840  | CDS  | 4847253 | 4849391 | -                | nrdD              | anaerobic ribonucleoside triphosphate reductase                            |
| i02_4841  | CDS  | 4849431 | 4849553 | +                | /                 | hypothetical protein                                                       |
| i02_4842  | CDS  | 4849785 | 4851440 | -                | treC              | trehalose-6-phosphate hydrolase                                            |
| i02_4843  | CDS  | 4851490 | 4852911 | -                | treB              | trehalose(maltose)-specific PTS system                                     |
| i02_4844  | CDS  | 4853030 | 4853977 | -                | treR              | trehalose repressor                                                        |
| i02_4845  | CDS  | 4854356 | 4857052 | +                | mgtA              | magnesium-transporting ATPase MgtA                                         |
| i02_4846  | CDS  | 4857043 | 4857156 | +                | /                 | hypothetical protein                                                       |
| i02_4847  | CDS  | 4857258 | 4857716 | -                | yjgF              | hypothetical protein                                                       |
| i02_4848  | CDS  | 4857717 | 4858178 | -                | pyrI              | aspartate carbamoyltransferase regulatory subunit                          |
| i02_4849  | CDS  | 4858191 | 4859126 | -                | pyrB              | aspartate carbamoyltransferase catalytic subunit                           |
| i02_4850  | CDS  | 4859130 | 4859264 | -                | pyrL              | pyrBI operon leader peptide                                                |
| i02_4851  | CDS  | 4859354 | 4859908 | -                | /                 | hypothetical protein                                                       |
| i02_4852  | CDS  | 4859958 | 4861406 | -                | /                 | hypothetical protein                                                       |
| i02_4853  | CDS  | 4861418 | 4862422 | -                | /                 | ornithine carbamoyltransferase                                             |
| i02_4854  | CDS  | 4862446 | 4863378 | -                | /                 | carbamate kinase                                                           |
| i02_4855  | CDS  | 4863389 | 4864612 | -                | /                 | arginine deiminase                                                         |
| i02_4856  | CDS  | 4864697 | 4864831 | -                | /                 | hypothetical protein                                                       |
| i02_4857  | CDS  | 4865287 | 4865739 | +                | yjgK              | hypothetical protein                                                       |
| i02_4858  | CDS  | 4865784 | 4866788 | -                | argI              | ornithine carbamoyltransferase subunit F                                   |
| i02_4859  | CDS  | 4866950 | 4867366 | +                | yjgD              | hypothetical protein                                                       |
| i02_4860  | CDS  | 4867544 | 4868065 | -                | /                 | hypothetical protein                                                       |
| i02_4861  | CDS  | 4868240 | 4869427 | +                | /                 | hypothetical protein                                                       |
| i02_4862  | CDS  | 4869474 | 4872329 | -                | valS              | valyl-tRNA synthetase                                                      |
| i02_4863  | CDS  | 4872329 | 4872772 | -                | holC              | DNA polymerase III subunit chi                                             |
| i02_4864  | CDS  | 4873030 | 4874541 | -                | pepA              | leucyl aminopeptidase                                                      |
| i02_4865  | CDS  | 4874808 | 4875908 | +                | yjgP              | hypothetical protein                                                       |
| i02_4866  | CDS  | 4875905 | 4876990 | +                | yjgQ              | hypothetical protein                                                       |
| i02_4867  | CDS  | 4877151 | 4878653 | -                | yjgR              | hypothetical protein                                                       |
| i02_4868  | CDS  | 4878731 | 4879759 | -                | idnR              | L-idonate regulatory protein                                               |
| i02_4869  | CDS  | 4879796 | 4881115 | -                | idnT              | Gnt-II system L-idonate transporter                                        |
| i02_4870  | CDS  | 4881180 | 4881944 | -                | idnO              | gluconate 5-dehydrogenase                                                  |
| i02_4871  | CDS  | 4881968 | 4882999 | -                | idnD              | L-idonate 5-dehydrogenase                                                  |
| i02_4872  | CDS  | 4883216 | 4883779 | +                | idnK              | D-gluconate kinase                                                         |
| i02_4873  | CDS  | 4883783 | 4884844 | -                | yjgB              | hypothetical protein                                                       |
| i02_4873a | CDS  | 4885269 | 4886534 | +                | /                 | prophage P4 integrase                                                      |
| i02_4874  | CDS  | 4886796 | 4887044 | +                | /                 | HNH nuclease                                                               |

| Locus_tag | Type | start   | End     | +/- <sup>a</sup> | Gene <sup>b</sup> | Product                                        |
|-----------|------|---------|---------|------------------|-------------------|------------------------------------------------|
| i02_4874a | CDS  | 4887198 | 4888196 | -                | /                 | conserved hypothetical protein                 |
| i02_4874b | CDS  | 4888341 | 4889096 | +                | /                 | conserved hypothetical protein                 |
| i02_4875  | CDS  | 4889093 | 4889695 | +                | /                 | hypothetical protein                           |
| i02_4876  | CDS  | 4889707 | 4893348 | +                | /                 | ATPase-like protein                            |
| i02_4877  | CDS  | 4893394 | 4897008 | +                | /                 | hypothetical protein                           |
| i02_4878  | CDS  | 4897185 | 4899782 | +                | /                 | hypothetical protein                           |
| i02_4879  | CDS  | 4899793 | 4901877 | +                | /                 | hypothetical protein                           |
| i02_4880  | CDS  | 4903949 | 4904146 | +                | /                 | predicted protein                              |
| i02_4881  | CDS  | 4905509 | 4905715 | +                | /                 | hypothetical protein                           |
| i02_4882  | CDS  | 4906701 | 4907915 | +                | /                 | transposase IS629                              |
| i02_4883  | CDS  | 4908501 | 4908629 | +                | /                 | hypothetical protein                           |
| i02_4884  | CDS  | 4908955 | 4909827 | +                | /                 | hypothetical protein                           |
| i02_4885  | CDS  | 4909887 | 4910798 | +                | /                 | hypothetical protein                           |
| i02_4885a | CDS  | 4911095 | 4914016 | +                | /                 | antigen 43 precursor (AG43) (Fluffing protein) |
| i02_4885b | CDS  | 4914124 | 4916511 | +                | /                 | conserved hypothetical protein                 |
| i02_4885c | CDS  | 4916508 | 4917413 | +                | /                 | conserved hypothetical protein                 |
| i02_4885d | CDS  | 4917410 | 4918480 | +                | /                 | phospholipase, patatin family                  |
| i02_4886  | CDS  | 4918820 | 4919638 | +                | /                 | hypothetical protein                           |
| i02_4887  | CDS  | 4919730 | 4920215 | +                | /                 | hypothetical protein                           |
| i02_4888  | CDS  | 4920261 | 4920707 | +                | /                 | putative radC-like protein yeeS                |
| i02_4889  | CDS  | 4921016 | 4921438 | +                | /                 | hypothetical protein                           |
| i02_4890  | CDS  | 4921528 | 4921902 | +                | /                 | hypothetical protein                           |
| i02_4891  | CDS  | 4923222 | 4924373 | +                | /                 | prophage P4 integrase                          |
| i02_4892  | CDS  | 4924616 | 4927687 | -                | /                 | hypothetical protein                           |
| i02_4893  | CDS  | 4927701 | 4929713 | -                | /                 | hypothetical protein                           |
| i02_4894  | CDS  | 4929744 | 4930088 | +                | /                 | hypothetical protein                           |
| i02_4895  | CDS  | 4929866 | 4930303 | -                | /                 | hypothetical protein                           |
| i02_4896  | CDS  | 4930300 | 4931001 | -                | /                 | hypothetical protein                           |
| i02_4897  | CDS  | 4930998 | 4934276 | -                | /                 | hypothetical protein                           |
| i02_4898  | CDS  | 4934276 | 4935181 | -                | /                 | hypothetical protein                           |
| i02_4900  | CDS  | 4935350 | 4935637 | -                | /                 | hypothetical protein                           |
| i02_4901  | CDS  | 4935895 | 4936608 | +                | /                 | hypothetical protein                           |
| i02_4902  | CDS  | 4937260 | 4937652 | -                | /                 | hypothetical protein                           |
| i02_4903  | CDS  | 4937922 | 4938251 | +                | /                 | hypothetical protein                           |
| i02_4904  | CDS  | 4938752 | 4938883 | +                | /                 | hypothetical protein                           |
| i02_4905  | CDS  | 4939010 | 4939990 | -                | /                 | hypothetical protein                           |
| i02_4906  | CDS  | 4940055 | 4941269 | -                | /                 | hypothetical protein                           |
| i02_4907  | CDS  | 4941181 | 4941906 | -                | /                 | hypothetical protein                           |
| i02_4908  | CDS  | 4942695 | 4943102 | -                | /                 | hypothetical protein                           |
| i02_4909  | CDS  | 4943362 | 4943964 | +                | fimB              | tyrosine recombinase                           |
| i02_4910  | CDS  | 4944442 | 4945038 | +                | fimE              | tyrosine recombinase                           |
| i02_4911  | CDS  | 4945462 | 4946067 | +                | fimA              | Type-1 fimbrial protein, A chain precursor     |
| i02_4912  | CDS  | 4946009 | 4946671 | +                | fimI              | fimbrin-like protein fimI precursor            |
| i02_4913  | CDS  | 4946708 | 4947433 | +                | fimC              | chaperone protein fimC precursor               |
| i02_4914  | CDS  | 4947499 | 4950135 | +                | fimD              | Outer membrane usher protein fimD precursor    |
| i02_4915  | CDS  | 4950142 | 4950675 | +                | fimF              | FimF protein precursor                         |
| i02_4916  | CDS  | 4950682 | 4951191 | +                | fimG              | FimG protein precursor                         |
| i02_4917  | CDS  | 4951202 | 4952113 | +                | fimH              | FimH protein precursor                         |
| i02_4918  | CDS  | 4952355 | 4953698 | -                | gntP              | fructuronate transporter                       |
| i02_4919  | CDS  | 4954038 | 4955222 | +                | uxuA              | mannonate dehydratase                          |
| i02_4920  | CDS  | 4955303 | 4956763 | +                | uxuB              | D-mannonate oxidoreductase                     |
| i02_4921  | CDS  | 4956978 | 4957751 | +                | uxuR              | DNA-binding transcriptional repressor UxuR     |
| i02_4922  | CDS  | 4958156 | 4958548 | +                | yjiD              | hypothetical protein                           |
| i02_4923  | CDS  | 4958596 | 4958937 | -                | /                 | hypothetical protein                           |
| i02_4924  | CDS  | 4958974 | 4959963 | -                | yjiE              | putative DNA-binding transcriptional regulator |
| i02_4925  | CDS  | 4959950 | 4961122 | -                | iadA              | isoaspartyl dipeptidase                        |
| i02_4926  | CDS  | 4961135 | 4961596 | -                | yjiG              | hypothetical protein                           |
| i02_4927  | CDS  | 4961593 | 4962288 | -                | yjiH              | hypothetical protein                           |

| Locus_tag | Type | start   | End     | +/- <sup>a</sup> | Gene <sup>b</sup> | Product                                       |
|-----------|------|---------|---------|------------------|-------------------|-----------------------------------------------|
| i02_4928  | CDS  | 4962288 | 4962419 | +                | /                 | hypothetical protein                          |
| i02_4929  | CDS  | 4962424 | 4962870 | +                | yjiI              | 2'-phosphotransferase-like protein            |
| i02_4930  | CDS  | 4962906 | 4963079 | +                | /                 | hypothetical protein                          |
| i02_4931  | CDS  | 4963092 | 4964270 | -                | yjiJ              | hypothetical protein                          |
| i02_4932  | CDS  | 4964338 | 4965309 | -                | yjiK              | hypothetical protein                          |
| i02_4933  | CDS  | 4965263 | 4965520 | -                | /                 | hypothetical protein                          |
| i02_4934  | CDS  | 4965517 | 4966290 | -                | yjiL              | hypothetical protein                          |
| i02_4935  | CDS  | 4966294 | 4967466 | -                | yjiM              | hypothetical protein                          |
| i02_4936  | CDS  | 4967561 | 4968877 | -                | yjiN              | hypothetical protein                          |
| i02_4937  | CDS  | 4969026 | 4969946 | +                | yfcl              | hypothetical protein                          |
| i02_4938  | CDS  | 4970226 | 4972445 | +                | /                 | hypothetical protein                          |
| i02_4939  | CDS  | 4972492 | 4972833 | -                | yjiW              | endoribonuclease SymE                         |
| i02_4940  | CDS  | 4973054 | 4974823 | -                | /                 | putative restriction modification enzyme S    |
| i02_4941  | CDS  | 4974823 | 4976346 | -                | /                 | putative restriction modification enzyme M    |
| i02_4942  | CDS  | 4976359 | 4978791 | -                | /                 | putative restriction modification enzyme R    |
| i02_4943  | CDS  | 4979048 | 4980721 | +                | /                 | hypothetical protein                          |
| i02_4944  | CDS  | 4980790 | 4981830 | -                | yjiA              | putative GTP-binding protein YjiA             |
| i02_4945  | CDS  | 4981757 | 4981960 | -                | /                 | hypothetical protein                          |
| i02_4946  | CDS  | 4982078 | 4984243 | -                | yjiY              | hypothetical protein                          |
| i02_4947  | CDS  | 4984605 | 4986269 | +                | tsr               | methyl-accepting chemotaxis protein I         |
| i02_4948  | CDS  | 4986312 | 4987583 | -                | /                 | hypothetical protein                          |
| i02_4949  | CDS  | 4987580 | 4988053 | -                | /                 | hypothetical protein                          |
| i02_4950  | CDS  | 4988117 | 4989088 | -                | /                 | putative C4-dicarboxylate-binding periplasmic |
| i02_4951  | CDS  | 4989758 | 4991431 | +                | /                 | putative Na(+)/H(+) exchanger yjcE            |
| i02_4952  | CDS  | 4991602 | 4992507 | -                | yjiM              | hypothetical protein                          |
| i02_4953  | CDS  | 4992646 | 4993668 | +                | /                 | hypothetical protein                          |
| i02_4954  | CDS  | 4993808 | 4996099 | -                | mdoB              | phosphoglycerol transferase I                 |
| i02_4955  | CDS  | 4996353 | 4996850 | -                | yjiA              | hypothetical protein                          |
| i02_4956  | CDS  | 4996896 | 4997633 | -                | dnaC              | DNA replication protein DnaC                  |
| i02_4957  | CDS  | 4997636 | 4998175 | -                | dnaT              | primosomal protein DnaI                       |
| i02_4958  | CDS  | 4998283 | 4998756 | -                | yjiB              | hypothetical protein                          |
| i02_4959  | CDS  | 4998747 | 4999580 | -                | yjiP              | hypothetical protein                          |
| i02_4960  | CDS  | 5000137 | 5000862 | +                | yjiQ              | hypothetical protein                          |
| i02_4961  | CDS  | 5000820 | 5001497 | +                | bglJ              | DNA-binding transcriptional activator BglJ    |
| i02_4962  | CDS  | 5001535 | 5002323 | -                | fhuF              | ferric iron reductase involved in ferric      |
| i02_4963  | CDS  | 5002377 | 5002700 | +                | /                 | hypothetical protein                          |
| i02_4964  | CDS  | 5002556 | 5002711 | +                | /                 | hypothetical protein                          |
| i02_4965  | CDS  | 5003127 | 5003249 | -                | /                 | hypothetical protein                          |
| i02_4966  | CDS  | 5003261 | 5004292 | -                | rsmC              | 16S ribosomal RNA m2G1207 methyltransferase   |
| i02_4967  | CDS  | 5004395 | 5004808 | +                | hoI               | DNA polymerase III subunit psi                |
| i02_4968  | CDS  | 5004777 | 5005223 | +                | rimI              | ribosomal-protein-alanine N-acetyltransferase |
| i02_4969  | CDS  | 5005238 | 5005915 | +                | yjiG              | nucleotidase                                  |
| i02_4970  | CDS  | 5006006 | 5007595 | +                | prfC              | peptide chain release factor 3                |
| i02_4971  | CDS  | 5007910 | 5008593 | +                | osmY              | periplasmic protein                           |
| i02_4972  | CDS  | 5008690 | 5008881 | +                | /                 | hypothetical protein                          |
| i02_4973  | CDS  | 5008967 | 5010076 | +                | yjiU              | hypothetical protein                          |
| i02_4974  | CDS  | 5010073 | 5010852 | +                | yjiV              | putative deoxyribonuclease YjiV               |
| i02_4975  | CDS  | 5011069 | 5011932 | -                | yjiW              | hypothetical protein                          |
| i02_4976  | CDS  | 5011904 | 5013454 | -                | yjiI              | hypothetical protein                          |
| i02_4977  | CDS  | 5013430 | 5013555 | +                | /                 | hypothetical protein                          |
| i02_4978  | CDS  | 5013688 | 5014491 | +                | deoC              | deoxyribose-phosphate aldolase                |
| i02_4979  | CDS  | 5014518 | 5015891 | +                | deoA              | thymidine phosphorylase                       |
| i02_4980  | CDS  | 5015943 | 5017166 | +                | deoB              | phosphopentomutase                            |
| i02_4981  | CDS  | 5017166 | 5017942 | +                | deoD              | purine nucleoside phosphorylase               |
| i02_4982  | CDS  | 5018109 | 5019440 | +                | yjiJ              | hypothetical protein                          |
| i02_4983  | CDS  | 5019441 | 5020457 | -                | lplA              | lipoate-protein ligase A                      |
| i02_4984  | CDS  | 5020485 | 5021129 | -                | smp               | hypothetical protein                          |
| i02_4985  | CDS  | 5021235 | 5022203 | +                | serB              | phosphoserine phosphatase                     |

| <b>Locus_tag</b> | <b>Type</b> | <b>start</b> | <b>End</b> | <b>+/-<sup>a</sup></b> | <b>Gene<sup>b</sup></b> | <b>Product</b>                               |
|------------------|-------------|--------------|------------|------------------------|-------------------------|----------------------------------------------|
| i02_4986         | CDS         | 5022204      | 5023634    | +                      | sms                     | DNA repair protein RadA                      |
| i02_4987         | CDS         | 5023634      | 5024887    | +                      | nadR                    | nicotinamide-nucleotide adenylyltransferase  |
| i02_4988         | CDS         | 5024901      | 5025311    | +                      | /                       | hypothetical protein                         |
| i02_4989         | CDS         | 5025313      | 5025597    | +                      | /                       | hypothetical protein                         |
| i02_4990         | CDS         | 5025653      | 5027320    | -                      | yjjK                    | putative ABC transporter ATP-binding protein |
| i02_4991         | CDS         | 5027294      | 5027458    | +                      | /                       | hypothetical protein                         |
| i02_4992         | CDS         | 5027527      | 5029464    | +                      | slt                     | lytic murein transglycosylase                |
| i02_4993         | CDS         | 5029554      | 5029880    | +                      | trpR                    | Trp operon repressor                         |
| i02_4994         | CDS         | 5029953      | 5030489    | -                      | yjjX                    | NTPase                                       |
| i02_4995         | CDS         | 5030532      | 5031179    | +                      | gpmB                    | phosphoglycerate mutase                      |
| i02_4996         | CDS         | 5031176      | 5032045    | -                      | rob                     | right origin-binding protein                 |
| i02_4997         | CDS         | 5032256      | 5032729    | +                      | creA                    | hypothetical protein                         |
| i02_4998         | CDS         | 5032751      | 5033431    | +                      | creB                    | DNA-binding response regulator CreB          |
| i02_4999         | CDS         | 5033431      | 5034855    | +                      | creC                    | sensory histidine kinase CreC                |
| i02_5000         | CDS         | 5034913      | 5036265    | +                      | creD                    | hypothetical protein                         |
| i02_5001         | CDS         | 5036325      | 5037041    | -                      | arcA                    | two-component response regulator             |
| i02_5002         | CDS         | 5037137      | 5037277    | +                      | /                       | hypothetical protein                         |
| i02_5003         | pseudo      | 5037677      | 5038362    | +                      | lasT                    | putative RNA methyltransferase               |

<sup>a</sup> +/-, orientation as annotated.

<sup>b</sup> Gene name from CFT073 or APEC O1 genome annotation.
