# Supplementary material for: Rates of Mutation and Host Transmission for an Escherichia coli Clone over 3 Years
Source: PubMed Central journal article supplement (PMC3203180; doi:10.1371/journal.pone.0026907), 2011-10-27
Supplement: pone.0026907.s003.pdf [file pone.0026907.s003.pdf]

**Table S2** The orthologs of clone D and CFT073 genomes. Genes present in 1 or both of the genomes are listed with the gene tag numbers, gene name and product<sup>a</sup>.

| Clone D  | CFT 073 | Gene | Product                                                  |
|----------|---------|------|----------------------------------------------------------|
| i02_5004 | c5491   | thrL | thr operon leader peptide                                |
| -        | c0002   | /    | hypothetical protein                                     |
| i02_0001 | c0003   | thrA | bifunctional aspartokinase I/homoserine                  |
| i02_0002 | c0004   | thrB | homoserine kinase                                        |
| i02_0003 | c0005   | thrC | threonine synthase                                       |
| i02_0004 | c0006   | /    | hypothetical protein                                     |
| i02_0005 | c0007   | yaaX | hypothetical protein                                     |
|          | c0008   | /    | hypothetical protein                                     |
|          | c0009   | /    | hypothetical protein                                     |
| i02_0006 | c0010   | yaaA | hypothetical protein                                     |
| i02_0007 | c0011   | yaaJ | putative transporter yaaJ                                |
| i02_0008 | c0012   | talB | transaldolase B                                          |
| i02_0009 | c0013   | mogA | molybdenum cofactor biosynthesis protein                 |
| i02_0010 | c0015   | yaaH | hypothetical protein                                     |
| i02_0011 | c0016   | yaaW | hypothetical protein                                     |
| i02_0012 | c0017   | yaal | hypothetical protein                                     |
|          | c0018   | /    | putative glutamate dehydrogenase                         |
| i02_0013 | c0019   | dnaK | molecular chaperone DnaK                                 |
| i02_0014 | c0020   | dnaJ | chaperone protein DnaJ                                   |
| i02_0015 | c0021   | /    | hypothetical protein                                     |
| i02_0016 | c0022   | /    | hypothetical protein                                     |
| i02_0017 | c0023   | /    | hypothetical protein                                     |
| i02_0018 | c0024   | nhaA | pH-dependent sodium/proton antiporter                    |
| i02_0019 | c0025   | nhaR | transcriptional activator NhaR                           |
| i02_0020 | c0026   | /    | hypothetical protein                                     |
| i02_0021 | c0027   | rpsT | 30S ribosomal protein S20                                |
| i02_0022 | c0028   | yaaY | hypothetical protein                                     |
| i02_0023 | c0029   | ribF | bifunctional riboflavin kinase/FMN                       |
| i02_0024 | c0030   | ileS | isoleucyl-tRNA synthetase                                |
| i02_0025 | c0031   | lspA | lipoprotein signal peptidase                             |
| i02_0026 | c0032   | slpA | FKBP-type 16 kDa peptidyl-prolyl cis-trans               |
|          |         | ispH | 1-hydroxy-2-methyl-2-(E)-butenyl 4-diphosphate reductase |
| i02_0028 |         | rihC | ribonucleoside hydrolase RihC                            |
| i02_0029 | c0036   | /    | hypothetical protein                                     |
| i02_0030 | c0037   | dapB | dihydrodipicolinate reductase                            |
| i02_0031 | c0038   | /    | hypothetical protein                                     |
| i02_0032 | c0039   | /    | hypothetical protein                                     |
| i02_0033 | c0040   | carA | carbamoyl phosphate synthase small subunit               |
| i02_0034 | c0041   | carB | carbamoyl phosphate synthase large subunit               |
| i02_0036 | c0043   | caiF | DNA-binding transcriptional activator CaiF               |
| i02_0035 | c0042   | /    | hypothetical protein                                     |
| i02_0037 | c0044   | caiE | carnitine operon protein CaiE                            |
| i02_0038 | c0045   | caiD | carnitiny-CoA dehydratase                                |
| i02_0039 | c0046   | caiC | putative crotonobetaine/carnitine-CoA ligase             |
| i02_0040 | c0047   | caiB | crotonobetainyl-CoA:carnitine CoA-transferase            |
| i02_0041 | c0048   | caiA | crotonobetainyl-CoA dehydrogenase                        |

| <b>Clone D</b> | <b>CFT 073</b> | <b>Gene</b> | <b>Product</b>                                 |
|----------------|----------------|-------------|------------------------------------------------|
| i02_0042       | c0049          | caiT        | L-carnitine/gamma-butyrobetaine antiporter     |
| i02_0043       | c0050          | fixA        | putative electron transfer flavoprotein FixA   |
| i02_0044       |                | fixB        | putative electron transfer flavoprotein FixB   |
| i02_0045       | c0053          | fixC        | putative oxidoreductase FixC                   |
| i02_0046       | c0054          | fixX        | ferredoxin-like protein                        |
| i02_0047       | c0055          | yaaU        | metabolite transporter                         |
| i02_0048       | c0056          | yabF        | glutathione-regulated potassium-efflux system  |
| i02_0049       | c0057          | kefC        | glutathione-regulated potassium-efflux system  |
| i02_0050       | c0058          | folA        | dihydrofolate reductase                        |
| i02_0051       | c0059          | /           | putative antitoxin of gyrase inhibiting        |
| i02_0052       | c0060          | /           | putative toxin of gyrase inhibiting            |
|                | c0062          | /           | hypothetical protein                           |
| i02_0053       | c0061          | apaH        | diadenosine tetraphosphatase                   |
| i02_0054       | c0063          | apaG        | ApaG                                           |
| i02_0055       | c0064          | ksgA        | dimethyladenosine transferase                  |
| i02_0056       | c0065          | pdxA        | 4-hydroxythreonine-4-phosphate dehydrogenase   |
| i02_0057       | c0066          | surA        | peptidyl-prolyl cis-trans isomerase SurA       |
| i02_0058       | c0067          | imp         | organic solvent tolerance protein              |
| i02_0059       | c0068          | djIA        | Dna-J like membrane chaperone protein          |
| i02_0060       | c0069          | yabO        | 23S rRNA/tRNA pseudouridine synthase A         |
| i02_0061       | c0070          | hepA        | ATP-dependent helicase HepA                    |
| i02_0062       | c0071          | polB        | DNA polymerase II                              |
| -              | c0072          | /           | transposase                                    |
| i02_0063       | c0073          | araD        | L-ribulose-5-phosphate 4-epimerase             |
| i02_0064       | c0074          | araA        | L-arabinose isomerase                          |
| i02_0065       | c0075          | araB        | ribulokinase                                   |
| i02_0066       | c0076          | araC        | DNA-binding transcriptional regulator AraC     |
| i02_0067       | c0077          | /           | hypothetical protein                           |
| i02_0068       | c0078          | /           | hypothetical protein                           |
| i02_0069       | c0079          | /           | hypothetical protein                           |
| i02_0070       | c0080          | /           | hypothetical protein                           |
| i02_0071       | c0081          | yabl        | hypothetical protein                           |
| i02_0072       | c0082          | thiQ        | thiamine transporter ATP-binding subunit       |
| i02_0073       | c0083          | thiP        | thiamine transporter membrane protein          |
| i02_0074       | c0084          | tbpA        | thiamine transporter substrate binding subunit |
| i02_0075       |                | /           | hypothetical protein                           |
| i02_0076       | c0085          | yabN        | transcriptional regulator SgrR                 |
| i02_0077       |                | /           | hypothetical protein                           |
| -              | c0086          | /           | transposase                                    |
|                | c0088          | /           | hypothetical protein                           |
| i02_0078       | c0087          | leuD        | isopropylmalate isomerase small subunit        |
| i02_0079       | c0089          | leuC        | isopropylmalate isomerase large subunit        |
| i02_0080       | c0090          | leuB        | 3-isopropylmalate dehydrogenase                |
| i02_0081       | c0091          | leuA        | 2-isopropylmalate synthase                     |
| i02_0082       | c5492          | leuL        | leu operon leader peptide                      |
|                | c0092          | /           | hypothetical protein                           |
| i02_0083       | c0093          | leuO        | leucine transcriptional activator              |
| i02_0084       | c0094          | /           | hypothetical protein                           |
| i02_0085       | c0095          | ilvI        | acetolactate synthase 3 catalytic subunit      |
| i02_0086       | c0096          | ilvH        | acetolactate synthase 3 regulatory subunit     |
|                | c5493          | fruL        | hypothetical protein                           |
| i02_0087       | c0097          | /           | hypothetical protein                           |

| <b>Clone D</b> | <b>CFT 073</b> | <b>Gene</b> | <b>Product</b>                                                    |
|----------------|----------------|-------------|-------------------------------------------------------------------|
| i02_0088       | c0098          | fruR        | DNA-binding transcriptional regulator FruR                        |
| i02_0089       |                | /           | hypothetical protein                                              |
| i02_0090       | c0099          | yabB        | cell division protein MraZ                                        |
| i02_0091       | c0100          | mraW        | S-adenosyl-methyltransferase MraW                                 |
| i02_0092       | c0101          | ftsL        | cell division protein FtsL                                        |
| i02_0093       | c0102          | ftsI        | peptidoglycan synthetase ftsI precursor                           |
| i02_0094       | c0103          | murE        | UDP-N-acetylmuramoylalanyl-D-glutamate 2,6-diaminopimelate ligase |
| i02_0095       | c0104          | murF        | D-alanyl-D-alanine-adding enzyme                                  |
| i02_0096       | c0105          | mraY        | phospho-N-acetylmuramoyl-pentapeptide transferase                 |
| i02_0097       | c0106          | murD        | UDP-N-acetylmuramoyl-L-alanine:D-glutamate ligase                 |
| i02_0098       | c0107          | ftsW        | cell division protein FtsW                                        |
| i02_0099       | c0108          | murG        | N-acetylglucosaminyl transferase                                  |
| i02_0100       | c0109          | murC        | UDP-N-acetylmuramate--L-alanine ligase                            |
| i02_0101       | c0110          | ddl         | D-alanine--D-alanine ligase                                       |
| i02_0102       | c0111          | ftsQ        | cell division protein FtsQ                                        |
| i02_0103       | c0112          | ftsA        | cell division protein FtsA                                        |
| i02_0104       | c0113          | ftsZ        | cell division protein FtsZ                                        |
| i02_0105       | c0114          | lpxC        | UDP-3-O-[3-hydroxymyristoyl] N-acetylglucosamine                  |
| i02_0106       | c0115          | yacA        | SecA regulator SecM                                               |
| i02_0107       | c0116          | secA        | preprotein translocase subunit SecA                               |
| i02_0108       | c0117          | mutT        | nucleoside triphosphate pyrophosphohydrolase                      |
| i02_0109       | c0118          | /           | hypothetical protein                                              |
| i02_0110       | c0119          | /           | transposase insK                                                  |
|                | c0120          | /           | hypothetical protein                                              |
| i02_0111       | c0121          | yacG        | zinc-binding protein                                              |
| i02_0112       | c0122          | yacF        | hypothetical protein                                              |
| i02_0113       | c0123          | coaE        | dephospho-CoA kinase                                              |
| i02_0114       | c0124          | guaC        | guanosine 5'-monophosphate oxidoreductase                         |
| i02_0115       | c0125          | hofC        | type IV pilin biogenesis protein                                  |
| i02_0116       | c0126          | hofB        | hypothetical protein                                              |
| i02_0117       | c0127          | ppdD        | putative major pilin subunit                                      |
| i02_0118       | c0128          | nadC        | quinolinate phosphoribosyltransferase                             |
| i02_0119       | c0129          | ampD        | N-acetyl-anhydromuranmyl-L-alanine amidase                        |
| i02_0120       | c0130          | ampE        | regulatory protein AmpE                                           |
| i02_0121       | c0131          | aroP        | aromatic amino acid transporter                                   |
| i02_0122       |                | usp         | uropathogenic specific protein                                    |
| i02_0123       | c0133          | /           | hypothetical protein                                              |
| i02_0124       | c0134          | /           | hypothetical protein                                              |
| i02_0125       |                | /           | hypothetical protein                                              |
| i02_0126       | c0136          | /           | hypothetical protein                                              |
| i02_0127       | c0137          | /           | hypothetical protein                                              |
| -              | c0138          | /           | hypothetical protein                                              |
| -              | c0139          | /           | transposase IS629                                                 |
| i02_0128       | c0140          | pdhR        | transcriptional regulator PdhR                                    |
| i02_0130       | c0142          | aceE        | pyruvate dehydrogenase subunit E1                                 |
| i02_0129       | c0141          | /           | hypothetical protein                                              |
| i02_0131       |                | aceF        | dihydrolipoamide acetyltransferase                                |
| i02_0132       | c0145          | lpdA        | dihydrolipoamide dehydrogenase                                    |

| <b>Clone D</b> | <b>CFT 073</b> | <b>Gene</b> | <b>Product</b>                                         |
|----------------|----------------|-------------|--------------------------------------------------------|
| i02_0133       | c0146          | yacH        | hypothetical protein                                   |
| i02_0134       | c0147          | acnB        | bifunctional aconitate hydratase                       |
| i02_0135       | c0148          | yacL        | hypothetical protein                                   |
| i02_0136       | c0149          | speD        | S-adenosylmethionine decarboxylase                     |
| i02_0137       | c0150          | speE        | spermidine synthase                                    |
| i02_0139       | c0152          | yacK        | multicopper oxidase                                    |
| i02_0138       | c0151          | yacC        | hypothetical protein                                   |
| i02_0140       | c0153          | gcd         | glucose dehydrogenase                                  |
| i02_0141       | c0154          | hpt         | hypoxanthine-guanine phosphoribosyltransferase         |
| i02_0142       | c0155          | yadF        | carbonic anhydrase                                     |
| i02_0143       | c0156          | yadG        | ABC transporter ATP-binding protein                    |
| i02_0144       | c0157          | yadH        | hypothetical protein                                   |
| i02_0145       | c0158          | yadI        | putative PTS system IIA component yadI                 |
| i02_0146       | c0159          | yadE        | hypothetical protein                                   |
| i02_0148       | c0161          | /           | hypothetical protein                                   |
| i02_0147       | c0160          | panD        | aspartate alpha-decarboxylase                          |
| i02_0149       | c0162          | yadD        | hypothetical protein                                   |
| i02_0150       | c0163          | /           | hypothetical protein                                   |
| i02_0151       | c0164          | panC        | pantoate--beta-alanine ligase                          |
| i02_0152       | c0165          | panB        | 3-methyl-2-oxobutanoate                                |
| i02_0153       | c0166          | yadC        | putative fimbrial-like adhesin protein                 |
| i02_0154       | c0167          | yadK        | hypothetical protein                                   |
| i02_0155       | c0168          | yadL        | hypothetical protein                                   |
| i02_0156       | c0169          | yadM        | hypothetical protein                                   |
| i02_0157       | c0170          | htrE        | putative outer membrane usher protein                  |
| i02_0158       | c0171          | ecpD        | putative chaperone protein EcpD                        |
|                | c0173          | /           | hypothetical protein                                   |
| i02_0159       | c0172          | yadN        | fimbrial-like protein yadN precursor                   |
|                | c0174          | /           | hypothetical protein                                   |
| i02_0160       | c0175          | folk        | 2-amino-4-hydroxy-6-hydroxymethyl-dihydropteridine     |
| i02_0161       | c0176          | pcnB        | poly(A) polymerase I                                   |
| i02_0162       | c0177          | yadB        | glutamyl-Q tRNA(Asp) synthetase                        |
| i02_0163       | c0178          | dksA        | DnaK transcriptional regulator DksA                    |
| i02_0164       | c0179          | sfsA        | sugar fermentation stimulation protein A               |
| i02_0166       | c0181          | hrpB        | ATP-dependent RNA helicase HrpB                        |
| i02_0165       | c0180          | yadP        | 2'-5' RNA ligase                                       |
| i02_0168       | c0183          | mrcB        | penicillin-binding protein 1b                          |
| i02_0167       | c0182          | /           | hypothetical protein                                   |
| i02_0170       | c0185          | fhuA        | ferrichrome outer membrane transporter                 |
| i02_0169       | c0184          | /           | hypothetical protein                                   |
| i02_0171       | c0186          | fhuC        | iron-hydroxamate transporter ATP-binding subunit       |
| i02_0172       | c0187          | fhuD        | iron-hydroxamate transporter substrate-binding subunit |
| i02_0173       | c0188          | fhuB        | iron-hydroxamate transporter permease subunit          |
| i02_0174       | c0189          | hemL        | glutamate-1-semialdehyde aminotransferase              |
| i02_0175       | c0190          | yadQ        | chloride channel protein                               |
| i02_0176       | c0191          | yadR        | iron-sulfur cluster insertion protein ErpA             |
| i02_0177       | c0192          | /           | hypothetical protein                                   |
| i02_0178       | c0193          | yadS        | hypothetical protein                                   |
| i02_0179       | c0194          | yadT        | vitamin B12-transporter protein BtuF                   |
| i02_0180       | c0195          | pfs         | 5'-methylthioadenosine/S-adenosylhomocysteine          |

| <b>Clone D</b> | <b>CFT 073</b> | <b>Gene</b> | <b>Product</b>                                               |
|----------------|----------------|-------------|--------------------------------------------------------------|
| i02_0181       | c0196          | dgt         | deoxyguanosinetriphosphate triphosphohydrolase               |
| i02_0182       | c0197          | htrA        | serine endoprotease                                          |
| -              | c0198          | /           | transposase                                                  |
| i02_0183       | c0199          | yaeG        | carbohydrate diacid transcriptional activator                |
| i02_0184       | c0200          | yaeH        | hypothetical protein                                         |
| i02_0185       | c0201          | dapD        | 2,3,4,5-tetrahydropyridine-2,6-carboxylate                   |
| i02_0186       | c0202          | glnD        | PII uridylyl-transferase                                     |
| i02_0187       | c0203          | map         | methionine aminopeptidase                                    |
| i02_0188       | c0204          | rpsB        | 30S ribosomal protein S2                                     |
| i02_0190       | c0206          | tsf         | elongation factor Ts                                         |
| i02_0189       | c0205          | /           | hypothetical protein                                         |
| i02_0191       | c0207          | pyrH        | uridylate kinase                                             |
| i02_0192       | c0208          | frr         | ribosome recycling factor                                    |
| i02_0193       |                | dxr         | 1-deoxy-D-xylulose 5-phosphate reductoisomerase              |
| i02_0194       | c0211          | yaeS        | undecaprenyl pyrophosphate synthase                          |
| i02_0195       | c0212          | cdsA        | CDP-diglyceride synthase                                     |
| i02_0196       | c0213          | yaeL        | zinc metallopeptidase RseP                                   |
| i02_0197       | c0214          | yaeT        | outer membrane protein assembly factor YaeT                  |
| i02_0198       | c0215          | hlpA        | periplasmic chaperone                                        |
| i02_0199       | c0216          | lpxD        | UDP-3-O-[3-hydroxymyristoyl] glucosamine                     |
| i02_0200       | c0217          | fabZ        | (3R)-hydroxymyristoyl-ACP dehydratase                        |
| i02_0201       | c0218          | lpxA        | UDP-N-acetylglucosamine acyltransferase                      |
| i02_0202       | c0219          | lpxB        | lipid-A-disaccharide synthase                                |
| i02_0203       | c0220          | rnhB        | ribonuclease HII                                             |
| i02_0204       | c0221          | dnaE        | DNA polymerase III subunit alpha                             |
|                | c0222          | /           | hypothetical protein                                         |
| i02_0205       | c0223          | accA        | acetyl-CoA carboxylase carboxyltransferase                   |
| i02_0206       | c0224          | ldcC        | lysine decarboxylase                                         |
| i02_0207       | c0225          | yaeR        | hypothetical protein                                         |
| i02_0208       | c0226          | tilS        | tRNA(Ile)-lysine synthetase                                  |
| i02_0209       | c0227          | yaeO        | Rho-binding antiterminator                                   |
| i02_0210       | c0228          | /           | hypothetical protein                                         |
| i02_0211       | c0229          | yaeQ        | hypothetical protein                                         |
| i02_0212       | c0230          | yaeJ        | peptidyl-tRNA hydrolase domain protein                       |
| i02_0213       | c0231          | cutF        | outer membrane lipoprotein NlpE, involved in surface sensing |
| i02_0214       | c0232          | /           | transposase insK                                             |
| i02_0215       | c0233          | /           | hypothetical protein                                         |
| i02_0216       | c0234          | yaeF        | hypothetical protein                                         |
| i02_0217       | c0235          | proS        | prolyl-tRNA synthetase                                       |
| i02_0218       | c0236          | yaeB        | hypothetical protein                                         |
| i02_0219       | c0237          | rcsF        | outer membrane lipoprotein                                   |
| i02_0220       | c0238          | metQ        | DL-methionine transporter substrate-binding                  |
| i02_0221       | c0239          | yaeE        | DL-methionine transporter permease subunit                   |
| i02_0222       | c0240          | metN        | DL-methionine transporter ATP-binding subunit                |
| i02_0223       | c0241          | yaeD        | D,D-heptose 1,7-bisphosphate phosphatase                     |
| i02_0224       |                | /           | hypothetical protein                                         |
| i02_0226       | c0244          | dkgB        | 2,5-diketo-D-gluconate reductase B                           |
| i02_0227       | c0245          | yafC        | putative transcriptional regulator YafC                      |
| i02_0228       | c0246          | yafD        | hypothetical protein                                         |
| i02_0229       | c0247          | yafE        | hypothetical protein                                         |

| <b>Clone D</b> | <b>CFT 073</b> | <b>Gene</b> | <b>Product</b>                                 |
|----------------|----------------|-------------|------------------------------------------------|
| i02_0230       | c0248          | mltD        | membrane-bound lytic murein transglycosylase D |
| i02_0231       | c0249          | gloB        | hydroxyacylglutathione hydrolase               |
| i02_0232       | c0250          | yafS        | hypothetical protein                           |
| i02_0234       | c0252          | dnaQ        | DNA polymerase III subunit epsilon             |
| i02_0233       | c0251          | rnhA        | ribonuclease H                                 |
| i02_0235       | c0253          | /           | hypothetical protein                           |
|                | c0254          | /           | hypothetical protein                           |
| i02_0236       | c0255          | /           | hypothetical protein                           |
| i02_0237       | c0256          | /           | hypothetical protein                           |
| i02_0238       | c0257          | /           | hypothetical protein                           |
| i02_0239       | c0258          | /           | hypothetical protein                           |
| i02_0240       | c0259          | /           | hypothetical protein                           |
| i02_0241       | c0261          | /           | transposase                                    |
|                | c0260          | /           | hypothetical protein                           |
| i02_0242       | -              | /           | hypothetical protein                           |
| i02_0243       | -              | /           | putative integrase of prophage                 |
| i02_0244       | -              | /           | hypothetical protein                           |
| i02_0245       | -              | /           | hypothetical protein                           |
| i02_0246       | -              | /           | hypothetical protein                           |
| i02_0247       | -              | /           | hypothetical protein                           |
| i02_0248       | -              | /           | hypothetical protein                           |
| i02_0249       | -              | /           | hypothetical protein                           |
| i02_0250       | -              | /           | hypothetical protein                           |
| i02_0251       | -              | /           | hypothetical protein                           |
| i02_0252       | -              | /           | putative single stranded DNA-binding protein   |
| i02_0253       | -              | /           | hypothetical protein                           |
| i02_0254       | -              | /           | putative capsid protein of prophage            |
| i02_0255       | -              | /           | hypothetical protein                           |
| i02_0256       | -              | /           | hypothetical protein                           |
| i02_0257       | -              | /           | conserved hypothetical protein                 |
| i02_0258       | -              | /           | gp1                                            |
| i02_0259       | -              | /           | hypothetical protein                           |
| i02_0260       | c0261          | /           | transposase                                    |
| i02_0261       | c0262          | /           | hypothetical protein                           |
| i02_0262       | c0263          | /           | putative transposase                           |
| i02_0263       | c0264          | /           | hypothetical protein                           |
| i02_0264       | c0265          | /           | hypothetical protein                           |
|                | c0268          | /           | hypothetical protein                           |
| i02_0265       | c0269          | /           | hypothetical protein                           |
| i02_0266       | c0270          | /           | hypothetical protein                           |
| i02_0267       | c0271          | /           | hypothetical protein                           |
|                | c0272          | /           | hypothetical protein                           |
|                | c0274          | /           | hypothetical protein                           |
| i02_0268       | c0273          | yeeS        | putative radC-like protein yeeS                |
| i02_0269       | c0275          | /           | hypothetical protein                           |
|                | c0277          | /           | hypothetical protein                           |
| i02_0270       | c0276          | /           | hypothetical protein                           |
| i02_0271       | c0278          | /           | hypothetical protein                           |
| i02_0272       | c0279          | /           | hypothetical protein                           |
| i02_0273       | c0280          | /           | hypothetical protein                           |
| i02_0274       |                | /           | hypothetical protein                           |
| i02_0275       | c0281          | /           | hypothetical protein                           |

| <b>Clone D</b> | <b>CFT 073</b> | <b>Gene</b> | <b>Product</b>                          |
|----------------|----------------|-------------|-----------------------------------------|
| i02_0276       | c0282          | /           | hypothetical protein                    |
| i02_0277       | c0283          | /           | hypothetical protein                    |
| i02_0278       | c0284          | /           | hypothetical protein                    |
| i02_0279       | c0285          | /           | hypothetical protein                    |
| i02_0280       | c0286          | /           | hypothetical protein                    |
| i02_0280       | c0287          | /           | hypothetical protein                    |
| i02_0281       | c0288          | /           | hypothetical protein                    |
| i02_0281       | c0289          | /           | hypothetical protein                    |
| i02_0282       | c0290          | /           | hypothetical protein                    |
| i02_0283       | c0291          | /           | hypothetical protein                    |
| i02_0284       |                | /           | conserved hypothetical protein          |
| i02_0285       | c0293          | /           | hypothetical protein                    |
| i02_0286       | c0294          | /           | hypothetical protein                    |
| i02_0287       | c0295          | /           | hypothetical protein                    |
| i02_0288       | c0296          | /           | hypothetical protein                    |
| i02_0289       | c0297          | /           | hypothetical protein                    |
| i02_0290       | c0298          | /           | hypothetical protein                    |
| i02_0291       | c0299          | /           | hypothetical protein                    |
|                | c0300          | /           | hypothetical protein                    |
| i02_0292       | c0301          | /           | hypothetical protein                    |
| i02_0293       | c0302          | /           | hypothetical protein                    |
| i02_0294       | c0303          | /           | hypothetical protein                    |
| i02_0295       | c0304          | /           | hypothetical protein                    |
| i02_0296       | c0305          | /           | hypothetical protein                    |
|                | c0306          | /           | hypothetical protein                    |
| i02_0297       | c0307          | /           | hypothetical protein                    |
| i02_0298       | c0308          | /           | hemolysin expression modulating protein |
| i02_0299       | c0309          | /           | hypothetical protein                    |
| i02_0300       | c0310          | /           | hypothetical protein                    |
| i02_0301       | c0311          | /           | hypothetical protein                    |
| i02_0302       | c0312          | /           | hypothetical protein                    |
| i02_0303       | c0313          | /           | hypothetical protein                    |
| i02_0304       | c0314          | /           | hypothetical protein                    |
| i02_0305       | c0315          | /           | hypothetical protein                    |
|                | c0317          | /           | hypothetical protein                    |
| i02_0306       | c0316          | /           | hypothetical protein                    |
| i02_0307       | c0318          | /           | hypothetical protein                    |
| i02_0308       | c0319          | /           | putative oligogalacturonide lyase       |
|                | c0320          | /           | hypothetical protein                    |
| i02_0309       | c0321          | /           | gluconate 5-dehydrogenase               |
| i02_0310       | c0322          | /           | putative oligogalacturonide transporter |
| i02_0311       | c0323          | /           | putative exopolygalacturonate lyase     |
|                | c0324          | /           | hypothetical protein                    |
| i02_0313       | c0325          | /           | hypothetical protein                    |
| i02_0314       | c0326          | /           | hypothetical protein                    |
| i02_0315       | c0327          | /           | hypothetical protein                    |
| i02_0316       | c0328          | /           | hypothetical protein                    |
| i02_0317       | c0329          | /           | hypothetical protein                    |
| i02_0318       | c0330          | /           | putative deoxyribose operon repressor   |
| i02_0319       | c0331          | /           | putative ribokinase                     |
| i02_0320       | c0332          | /           | putative L-fucose permease              |
| i02_0321       | c0333          | /           | putative cytoplasmic protein            |

| <b>Clone D</b> | <b>CFT 073</b> | <b>Gene</b> | <b>Product</b>                               |
|----------------|----------------|-------------|----------------------------------------------|
| i02_0322       | c0334          | ulaA        | ascorbate-specific PTS system enzyme IIC     |
| i02_0323       | c0335          | /           | hypothetical protein                         |
| i02_0324       | c0336          | /           | PTS system, mannitol (Cryptic)-specific IIA  |
| i02_0325       | c0337          | /           | hypothetical protein                         |
| i02_0326       | c0338          | /           | hypothetical protein                         |
| i02_0327       | c0339          | /           | hypothetical protein                         |
| i02_0328       | c0340          | /           | hypothetical protein                         |
| i02_0329       | c0341          | /           | hypothetical protein                         |
| i02_0330       |                | /           | hypothetical protein                         |
| i02_0331       | c0345          | /           | ShIA/HecA/FhaA exofamily protein             |
|                | c0348          | /           | hypothetical protein                         |
| i02_0332       | c0349          | /           | transposase                                  |
| i02_0333       |                | /           | PefB protein                                 |
| i02_0334       | c0350          | /           | Pic serine protease precursor                |
| i02_0335       | c0351          | /           | hypothetical protein                         |
| -              | c0352          | /           | partial transposase                          |
| -              | c0354          | /           | hypothetical protein                         |
|                | c0355          | /           | hypothetical protein                         |
| i02_0336       | c0357          | /           | hypothetical protein                         |
| i02_0337       | c0358          | /           | hypothetical protein                         |
|                | c0359          | /           | hypothetical protein                         |
| i02_0339       | c0360          | /           | hypothetical protein                         |
| i02_0340       | c0361          | /           | putative cytoplasmic membrane export protein |
| i02_0341       | c0362          | /           | putative membrane spanning export protein    |
| i02_0342       | c0363          | /           | RTX family exoprotein A gene                 |
| i02_0343       | c0364          | /           | hypothetical protein                         |
| i02_0344       | c0365          | /           | hypothetical protein                         |
| i02_0345       | c0366          | /           | hypothetical protein                         |
| i02_0346       | c0367          | /           | hypothetical protein                         |
| i02_0347       |                | /           | hypothetical protein                         |
| i02_0348       | c0368          | /           | hypothetical protein                         |
| i02_0349       | c0369          | yafV        | hypothetical protein                         |
| i02_0350       | c0370          | ykfE        | C-lysozyme inhibitor                         |
| i02_0351       | c0371          | fadE        | acyl-CoA dehydrogenase                       |
| i02_0352       | c0372          | gmhA        | phosphoheptose isomerase                     |
| i02_0353       | c0373          | yafJ        | hypothetical protein                         |
| i02_0354       | c0374          | yafK        | hypothetical protein                         |
|                | c0375          | /           | hypothetical protein                         |
| i02_0355       | c0376          | yafL        | lipoprotein yafL precursor                   |
| i02_0357       | c0378          | mbhA        | hypothetical protein                         |
| i02_0356       | c0377          | fhiA        | FhiA protein                                 |
| i02_0358       | c0379          | dinP        | DNA polymerase IV                            |
| i02_0359       | c0380          | yafP        | hypothetical protein                         |
| i02_0360       | c0381          | /           | hypothetical protein                         |
| i02_0361       | c0382          | prfH        | peptide chain release factor-like protein    |
| i02_0362       | c0383          | pepD        | aminoacyl-histidine dipeptidase              |
| i02_0363       | c0384          | gpt         | xanthine-guanine phosphoribosyltransferase   |
| i02_0365       | c0386          | frsA        | fermentation/respiration switch protein      |
| i02_0364       | c0385          | /           | hypothetical protein                         |
| i02_0366       | c0387          | crl         | DNA-binding transcriptional regulator Crl    |
| i02_0367       | c0388          | phoE        | outer membrane phosphoporin protein          |
| i02_0368       | c0389          | proB        | gamma-glutamyl kinase                        |



| <b>Clone D</b> | <b>CFT 073</b> | <b>Gene</b> | <b>Product</b>                               |
|----------------|----------------|-------------|----------------------------------------------|
| i02_0369       | c0390          | proA        | gamma-glutamyl phosphate reductase           |
| i02_0370       | c0391          | /           | CP4-like integrase                           |
| i02_0371       | c0392          | /           | hypothetical protein                         |
| i02_0372       | c0393          | /           | haemoglobin protease                         |
| i02_0373       | c0394          | /           | hypothetical protein                         |
| i02_0374       | c0395          | /           | hypothetical protein                         |
| i02_0375       | c0396          | /           | insertion element IS1 1/2/3/5/6 protein insA |
| i02_0377       | c0397          | /           | InsB protein                                 |
| i02_0376       |                | /           | hypothetical protein                         |
| i02_0378       | c0398          | /           | hypothetical protein                         |
| i02_0379       | c0399          | yagU        | hypothetical protein                         |
| i02_0380       |                | ykgJ        | putative ferredoxin                          |
| i02_0381       | c0400          | yagV        | hypothetical protein                         |
| i02_0382       | c0401          | yagW        | hypothetical protein                         |
| i02_0383       | c0402          | yagX        | hypothetical protein                         |
| i02_0384       | c0403          | yagY        | hypothetical protein                         |
| i02_0385       | c0404          | matB        | hypothetical protein                         |
| i02_0386       | c0405          | matA        | hypothetical protein                         |
| i02_0387       |                | /           | hypothetical protein                         |
| i02_0388       | c0406          | rpmJ        | 50S ribosomal protein L36                    |
| i02_0389       | c0407          | rpmE2       | 50S ribosomal protein L31 type B             |
| i02_0390       |                | /           | hypothetical protein                         |
| i02_0391       | c0408          | /           | hypothetical protein                         |
| i02_0391       | c0409          | /           | putative oxidoreductase                      |
| i02_0392       | c0410          | /           | hypothetical protein                         |
| i02_0393       | c0411          | /           | LysR family transcriptional regulator        |
| i02_0394       | c0412          | /           | putative transcriptional regulator YcjZ      |
| i02_0395       | c0413          | /           | putative aldo/keto reductase                 |
| i02_0396       | c0414          | /           | 2,5-diketo-D-gluconic acid reductase A       |
| i02_0397       | c0415          | eaeH        | putative adhesin                             |
| i02_0398       | c0416          | ykgA        | putative transcriptional regulator YkgA      |
| i02_0399       | c0417          | /           | 2,5-diketo-D-gluconic acid reductase A       |
| i02_0400       | c0418          | ykgB        | hypothetical protein                         |
| i02_0401       | c0419          | ykgI        | hypothetical protein                         |
| i02_0402       | c0420          | ykgC        | pyridine nucleotide-disulfide oxidoreductase |
| i02_0403       | c0421          | ykgD        | putative transcriptional regulator YkgD      |
| i02_0404       | c0422          | ykgE        | hypothetical protein                         |
| i02_0405       | c0423          | ykgF        | putative electron transport protein ykgF     |
| i02_0407       | c0424          | ykgG        | hypothetical protein                         |
| i02_0408       | c0425          | ykgH        | hypothetical protein                         |
| i02_0409       | c0426          | /           | hypothetical protein                         |
| i02_0410       | c0427          | /           | hypothetical protein                         |
| i02_0411       |                | /           | hypothetical protein                         |
| i02_0412       | c0428          | /           | hypothetical protein                         |
| i02_0413       | c0429          | /           | hypothetical protein                         |
| i02_0414       | c0430          | /           | Type 1 fimbriae regulatory protein fimB      |
| i02_0415       |                | /           | hypothetical protein                         |
| i02_0416       | c0431          | betA        | choline dehydrogenase                        |
| i02_0417       | c0432          | betB        | betaine aldehyde dehydrogenase               |
| i02_0418       | c0433          | betI        | transcriptional regulator BetI               |
| i02_0419       | c0434          | betT        | choline transport protein BetT               |
| i02_0420       | c0435          | /           | hypothetical protein                         |

| <b>Clone D</b> | <b>CFT 073</b> | <b>Gene</b> | <b>Product</b>                                  |
|----------------|----------------|-------------|-------------------------------------------------|
| i02_0421       | c0436          | yahB        | putative transcriptional regulator YahB         |
| i02_0422       | c0437          | yahC        | hypothetical protein                            |
| i02_0423       | c0438          | /           | hypothetical protein                            |
| i02_0424       | c0439          | yahD        | ankyrin repeat-containing protein               |
| i02_0425       | c0440          | yahE        | hypothetical protein                            |
| i02_0426       | c0441          | /           | hypothetical protein                            |
| i02_0427       |                | /           | hypothetical protein                            |
| i02_0428       | c0444          | /           | putative carbamate kinase                       |
| i02_0429       | c0445          | yahJ        | deaminase                                       |
| i02_0430       | c0446          | /           | hypothetical protein                            |
| i02_0431       | c0447          | yahK        | hypothetical protein                            |
| i02_0432       | c0448          | yahN        | hypothetical protein                            |
| i02_0433       | c0449          | yahO        | hypothetical protein                            |
| i02_0434       | c0450          | prpR        | propionate catabolism operon regulatory protein |
| i02_0435       | c0451          | prpB        | 2-methylisocitrate lyase                        |
| i02_0436       | c0452          | prpC        | methylcitrate synthase                          |
| i02_0437       | c0453          | prpD        | 2-methylcitrate dehydratase                     |
| i02_0438       | c0454          | prpE        | propionyl-CoA synthetase                        |
| i02_0439       | c0455          | codB        | cytosine permease                               |
| i02_0440       | c0456          | codA        | cytosine deaminase                              |
| i02_0441       | c0457          | lacA        | galactoside O-acetyltransferase                 |
| i02_0442       | c0458          | lacY        | galactoside permease                            |
| i02_0443       | c0459          | lacZ        | beta-D-galactosidase                            |
| i02_0444       | c0460          | lacI        | LacI protein                                    |
| i02_0445       | c0462          | yaiL        | hypothetical protein                            |
|                | c0463          | /           | hypothetical protein                            |
| i02_0446       | c0464          | yaiM        | hypothetical protein                            |
| i02_0447       | c0465          | adhC        | alcohol dehydrogenase class III                 |
| i02_0448       | c0466          | yaiN        | regulator protein FrmR                          |
| i02_0449       | c0467          | /           | hypothetical protein                            |
| i02_0450       | c0468          | /           | putative transferase                            |
| i02_0451       | c0469          | /           | hypothetical protein                            |
| i02_0452       | c0470          | /           | hypothetical protein                            |
| i02_0454       | c0472          | tauA        | taurine transporter substrate binding subunit   |
| i02_0453       | c0471          | /           | hypothetical protein                            |
| i02_0455       | c0473          | tauB        | taurine transporter ATP-binding subunit         |
|                | c0474          | /           | hypothetical protein                            |
| i02_0457       | c0475          | tauC        | taurine transporter subunit                     |
| i02_0458       | c0476          | tauD        | taurine dioxygenase                             |
| i02_0459       | c0477          | hemB        | delta-aminolevulinic acid dehydratase           |
| i02_0460       | c0478          | /           | putative structural protein                     |
| i02_0461       | c0479          | yaiV        | putative DNA-binding transcriptional regulator  |
| i02_0462       | c0480          | yaiH        | beta-lactam binding protein AmpH                |
| i02_0463       | c0481          | /           | hypothetical protein                            |
| i02_0464       | c0482          | sbmA        | transport protein                               |
| i02_0465       | c0483          | yaiW        | hypothetical protein                            |
| i02_0467       | c0485          | /           | hypothetical protein                            |
| i02_0466       | c0484          | yaiY        | hypothetical protein                            |
| i02_0468       | c0486          | yaiZ        | hypothetical protein                            |
| i02_0469       | c0487          | ddl         | D-alanyl-alanine synthetase A                   |
| i02_0470       | c0488          | /           | hypothetical protein                            |
| i02_0471       | c0489          | yaiB        | hypothetical protein                            |

| <b>Clone D</b> | <b>CFT 073</b> | <b>Gene</b> | <b>Product</b>                                  |
|----------------|----------------|-------------|-------------------------------------------------|
| i02_0472       | c0490          | phoA        | alkaline phosphatase                            |
| i02_0473       | c0491          | psiF        | hypothetical protein                            |
| i02_0474       | c0492          | adrA        | diguanylate cyclase AdrA                        |
| i02_0475       | c0493          | proC        | pyrroline-5-carboxylate reductase               |
| i02_0476       | c0494          | yaiI        | hypothetical protein                            |
| i02_0477       | c0495          | aroL        | shikimate kinase II                             |
| i02_0479       | c0496          | yaiA        | hypothetical protein                            |
|                | c0497          | /           | hypothetical protein                            |
| i02_0480       | c0498          | aroM        | hypothetical protein                            |
| i02_0481       | c0499          | yaiE        | hypothetical protein                            |
| i02_0483       | c0501          | ykiA        | hypothetical protein                            |
| i02_0482       | c0500          | /           | hypothetical protein                            |
| i02_0485       | c0503          | /           | fructokinase                                    |
| i02_0484       | c0502          | rdgC        | recombination associated protein                |
| i02_0486       | c0504          | araJ        | MFS transport protein AraJ                      |
| i02_0487       | c0505          | sbcC        | exonuclease subunit SbcC                        |
| i02_0489       | c0507          | /           | hypothetical protein                            |
| i02_0488       | c0506          | sbcD        | exonuclease subunit SbcD                        |
| i02_0490       | c0508          | phoB        | transcriptional regulator PhoB                  |
| i02_0491       | c0509          | phoR        | phosphate regulon sensor protein                |
| i02_0492       | c0510          | /           | hypothetical protein                            |
| i02_0493       | c0511          | brnQ        | branched chain amino acid ABC transporter       |
| i02_0494       | c0512          | proY        | putative proline-specific permease              |
| i02_0495       | c0513          | malZ        | maltodextrin glucosidase                        |
| i02_0496       | c0514          | yajB        | acyl carrier protein phosphodiesterase          |
| i02_0497       | c0515          | queA        | S-adenosylmethionine:tRNA                       |
| i02_0498       | c0516          | tgt         | queuine tRNA-ribosyltransferase                 |
| i02_0499       | c0517          | yajC        | preprotein translocase subunit YajC             |
| i02_0500       | c0518          | secD        | preprotein translocase subunit SecD             |
| i02_0501       | c0519          | secF        | preprotein translocase subunit SecF             |
| i02_0502       | c0520          | yajD        | hypothetical protein                            |
| i02_0503       | c0521          | tsx         | nucleoside-specific channel-forming protein tsx |
| i02_0504       | c0522          | yajI        | hypothetical protein                            |
| i02_0505       | c0523          | nrdR        | transcriptional regulator NrdR                  |
| i02_0506       | c0524          | ribD        | bifunctional                                    |
| i02_0507       | c0525          | ribH        | 6,7-dimethyl-8-ribityllumazine synthase         |
|                | c0526          | /           | hypothetical protein                            |
| i02_0508       | c0527          | nusB        | transcription antitermination protein NusB      |
| i02_0509       | c0528          | thiL        | thiamine monophosphate kinase                   |
| i02_0510       | c0529          | pgpA        | phosphatidylglycerophosphatase A                |
| i02_0511       | c0530          | yajO        | oxidoreductase yajO                             |
| i02_0512       | c0531          | dxs         | 1-deoxy-D-xylulose-5-phosphate synthase         |
| i02_0513       | c0532          | ispA        | geranyltranstransferase                         |
| i02_0514       | c0533          | xseB        | exodeoxyribonuclease VII small subunit          |
| i02_0515       | c0534          | yajK        | thiamine biosynthesis protein ThiI              |
| i02_0516       | c0535          | thiJ        | hypothetical protein                            |
| i02_0517       | c0536          | apbA        | 2-dehydropantoate 2-reductase                   |
| i02_0518       | c0537          | yajQ        | putative nucleotide-binding protein             |
| i02_0519       | c0538          | yajR        | putative transport protein YajR                 |
| i02_0520       | c0539          | cyoE        | protoheme IX farnesyltransferase                |
| i02_0521       | c0540          | cyoD        | cytochrome o ubiquinol oxidase subunit IV       |
| i02_0522       | c0541          | cyoC        | cytochrome o ubiquinol oxidase subunit III      |

| <b>Clone D</b> | <b>CFT 073</b> | <b>Gene</b> | <b>Product</b>                                  |
|----------------|----------------|-------------|-------------------------------------------------|
| i02_0523       | c0542          | cyoB        | cytochrome o ubiquinol oxidase subunit I        |
| i02_0524       | c0543          | cyoA        | cytochrome o ubiquinol oxidase subunit II       |
| i02_0525       | c0544          | ampG        | muropeptide transporter                         |
|                | c0545          | /           | hypothetical protein                            |
| i02_0526       | c0546          | yajG        | hypothetical protein                            |
| i02_0527       | c0547          | /           | hypothetical protein                            |
| i02_0528       | c0548          | bolA        | transcriptional regulator BolA                  |
|                | c0549          | /           | hypothetical protein                            |
| i02_0529       | c0550          | /           | hypothetical protein                            |
| i02_0530       | c0551          | tig         | trigger factor                                  |
|                | c0552          | /           | hypothetical protein                            |
| i02_0531       | c0553          | clpP        | ATP-dependent Clp protease proteolytic subunit  |
| i02_0532       | c0554          | clpX        | ATP-dependent protease ATP-binding subunit ClpX |
| i02_0533       | c0555          | lon         | DNA-binding ATP-dependent protease La           |
| i02_0534       | c0556          | hupB        | transcriptional regulator HU subunit beta       |
| i02_0535       | c0557          | ybaU        | peptidyl-prolyl cis-trans isomerase (rotamase)  |
| i02_0536       | c0558          | ybaV        | hypothetical protein                            |
| i02_0537       | c0559          | ybaW        | hypothetical protein                            |
| i02_0538       | c0560          | ybaX        | queuosine biosynthesis protein QueC             |
| i02_0539       | c0561          | ybaE        | hypothetical protein                            |
| i02_0540       | c0562          | cof         | Cof protein                                     |
| i02_0541       | c0564          | ybaO        | putative transcriptional regulator YbaO         |
| -              | c0563          | /           | hypothetical protein                            |
| i02_0542       | c0565          | mdlA        | putative multidrug transporter                  |
| i02_0543       | c0566          | mdlB        | putative multidrug transporter                  |
|                | c0567          | /           | hypothetical protein                            |
| i02_0544       | c0568          | glnK        | nitrogen regulatory protein P-II 2              |
|                | c0569          | /           | hypothetical protein                            |
| i02_0546       | c0570          | amtB        | ammonium transporter                            |
| i02_0548       |                | /           | hypothetical protein                            |
| i02_0547       | c0571          | tesB        | acyl-CoA thioesterase II                        |
| i02_0549       | c0572          | ybaY        | hypothetical protein                            |
| i02_0550       | c0573          | ybaZ        | hypothetical protein                            |
| i02_0551       | c0574          | ybaA        | hypothetical protein                            |
| i02_0552       | c0575          | ylaB        | hypothetical protein                            |
| i02_0553       | c0576          | ylaC        | hypothetical protein                            |
| i02_0554       | c0577          | ylaD        | maltose O-acetyltransferase                     |
| i02_0555       | c0578          | hha         | hemolysin expression-modulating protein         |
| i02_0556       | c0579          | ybaJ        | hypothetical protein                            |
| i02_0557       | c0580          | acrB        | acriflavin resistance protein B                 |
| i02_0558       | c0581          | acrA        | acriflavin resistance protein A                 |
| i02_0559       | c0582          | acrR        | DNA-binding transcriptional repressor AcrR      |
|                | c0583          | /           | hypothetical protein                            |
| i02_0560       | c0584          | aefA        | potassium efflux protein KefA                   |
| i02_0561       | c0585          | ybaM        | hypothetical protein                            |
| i02_0562       | c0586          | priC        | primosomal replication protein N'               |
| i02_0563       | c0587          | ybaN        | hypothetical protein                            |
| i02_0564       | c0588          | apt         | adenine phosphoribosyltransferase               |
| i02_0565       | c0589          | dnaX        | DNA polymerase III subunits gamma and tau       |
|                | c0590          | /           | hypothetical protein                            |

| <b>Clone D</b> | <b>CFT 073</b> | <b>Gene</b> | <b>Product</b>                                     |
|----------------|----------------|-------------|----------------------------------------------------|
| i02_0566       | c0591          | ybaB        | hypothetical protein                               |
| i02_0567       | c0592          | recR        | recombination protein RecR                         |
| i02_0568       | c0593          | htpG        | heat shock protein 90                              |
| i02_0569       | c0594          | adk         | adenylate kinase                                   |
| i02_0570       | c0595          | hemH        | ferrochelataase                                    |
| i02_0571       | c0596          | ybaC        | acetyl esterase                                    |
| i02_0572       | c0597          | gsk         | inosine-guanosine kinase                           |
| i02_0573       | c0598          | ybaL        | putative cation:proton antiport protein            |
| i02_0574       | c0599          | fsr         | fosmidomycin resistance protein                    |
| i02_0575       | c0600          | ushA        | bifunctional UDP-sugar hydrolase/5'-nucleotidase   |
| i02_0576       | c0601          | ybaK        | hypothetical protein                               |
| i02_0577       | c0602          | ybaP        | hypothetical protein                               |
| i02_0578       |                | /           | hypothetical protein                               |
| i02_0579       | c0603          | ybaQ        | hypothetical protein                               |
| i02_0580       | c0604          | copA        | copper exporting ATPase                            |
| i02_0581       | c0605          | ybaS        | glutaminase                                        |
| i02_0582       | c0606          | ybaT        | putative transport protein YbaT                    |
| i02_0583       | c0607          | ybbI        | DNA-binding transcriptional regulator CueR         |
| i02_0584       | c0608          | /           | hypothetical protein                               |
| i02_0585       | c0609          | ybbJ        | hypothetical protein                               |
| i02_0586       | c0610          | ybbK        | hypothetical protein                               |
| i02_0587       | c0611          | ybbL        | putative ABC transporter ATP-binding protein       |
| i02_0588       |                | ybbM        | putative metal resistance protein                  |
| i02_0589       | c0613          | ybbN        | hypothetical protein                               |
| i02_0590       | c0614          | ybbO        | short chain dehydrogenase                          |
| i02_0592       | c0616          | ybbA        | putative ABC transporter ATP-binding protein       |
| i02_0591       | c0615          | tesA        | multifunctional acyl-CoA thioesterase              |
| i02_0593       | c0617          | ybbP        | hypothetical protein                               |
| i02_0594       | c0618          | ybbB        | tRNA 2-selenouridine synthase                      |
| i02_0595       | c0619          | ybbS        | DNA-binding transcriptional activator AII5         |
| i02_0596       | c0620          | ybbT        | ureidoglycolate hydrolase                          |
| i02_0597       | c0621          | ybbU        | DNA-binding transcriptional repressor AIRR         |
| i02_0598       | c0622          | gcl         | glyoxylate carboligase                             |
| i02_0599       | c0623          | gip         | hydroxypyruvate isomerase                          |
| i02_0600       | c0624          | ybbQ        | 2-hydroxy-3-oxopropionate reductase                |
| i02_0601       | c0625          | ybbW        | allantoin permease                                 |
| i02_0602       | c0626          | ybbX        | allantoinase                                       |
| i02_0603       | c0627          | ybbY        | putative purine permease YbbY                      |
| i02_0604       | c0628          | ybbZ        | glycerate kinase II                                |
| i02_0605       | c0629          | ylbA        | hypothetical protein                               |
| i02_0606       | c0630          | ylbB        | allantoate amidohydrolase                          |
| i02_0607       | c0631          | /           | ureidoglycolate dehydrogenase                      |
| i02_0608       | c0632          | fdrA        | membrane protein FdrA                              |
| i02_0609       | c0633          | ylbE        | hypothetical protein                               |
| i02_0610       | c0634          | ylbF        | hypothetical protein                               |
| i02_0611       | c0635          | arcC        | carbamate kinase                                   |
| i02_0612       | c0636          | purK        | phosphoribosylaminoimidazole carboxylase<br>ATPase |
| i02_0613       | c0637          | purE        | phosphoribosylaminoimidazole carboxylase           |
| i02_0614       | c0638          | /           | hypothetical protein                               |
|                | c0640          | /           | hypothetical protein                               |
| i02_0615       | c0639          | ybbF        | UDP-2,3-diacetylglucosamine hydrolase              |

| <b>Clone D</b> | <b>CFT 073</b> | <b>Gene</b> | <b>Product</b>                                      |
|----------------|----------------|-------------|-----------------------------------------------------|
| i02_0616       | c0641          | ppiB        | peptidyl-prolyl cis-trans isomerase B               |
| i02_0617       | c0642          | cysS        | cysteinyl-tRNA synthetase                           |
| i02_0618       | c0643          | ybcI        | hypothetical protein                                |
| i02_0619       | c0644          | ybcJ        | hypothetical protein                                |
| i02_0620       | c0645          | folD        | bifunctional 5,10-methylene-tetrahydrofolate        |
| i02_0621       | c0646          | /           | hypothetical protein                                |
| i02_0622       |                | intD        | prophage DLP12 integrase                            |
| i02_0624       | c0649          | ydfM        | tail fiber assembly protein                         |
| i02_0623       |                | intD        | prophage DLP12 integrase                            |
|                | c0650          | /           | hypothetical protein                                |
| i02_0625       | c0651          | /           | hypothetical protein                                |
| i02_0626       | c0652          | ompT        | outer membrane protease                             |
| i02_0627       | c0653          | ybcH        | hypothetical protein                                |
| i02_0628       | c0654          | nfrA        | bacteriophage N4 receptor, outer membrane           |
| i02_0629       | c0655          | nfrB        | bacteriophage N4 adsorption protein B               |
| i02_0630       | c0656          | cusS        | sensor kinase CusS                                  |
| i02_0631       | c0657          | cusR        | DNA-binding transcriptional activator CusR          |
| i02_0632       | c0658          | cusC        | copper/silver efflux system outer membrane          |
| i02_0633       | c0659          | cusX        | periplasmic copper-binding protein                  |
| i02_0634       | c0660          | cusB        | copper/silver efflux system membrane fusion         |
| i02_0635       | c0661          | cusA        | putative cation efflux system protein cusA          |
| i02_0636       | c0662          | pheP        | phenylalanine transporter                           |
| i02_0637       | c0663          | ybdG        | hypothetical protein                                |
| i02_0638       | c0664          | nfnB        | dihydropteridine reductase                          |
| i02_0639       | c0665          | ybdF        | hypothetical protein                                |
| i02_0640       | c0666          | ybdJ        | hypothetical protein                                |
| i02_0641       | c0667          | ybdK        | carboxylate-amine ligase                            |
| i02_0642       |                | /           | hypothetical protein                                |
| i02_0643       | c0668          | entD        | phosphopantetheinyltransferase                      |
| i02_0645       | c0670          | /           | hypothetical protein                                |
| i02_0644       | c0669          | fepA        | outer membrane receptor FepA                        |
| i02_0646       | c0671          | fes         | enterobactin/ferric enterobactin esterase           |
|                | c0672          | /           | hypothetical protein                                |
| i02_0647       | c0673          | entF        | enterobactin synthase subunit F                     |
| i02_0648       | c0674          | fepE        | ferric enterobactin transport protein FepE          |
| i02_0649       | c0675          | fepC        | iron-enterobactin transporter ATP-binding component |
| i02_0650       | c0676          | fepG        | iron-enterobactin transporter permease              |
| i02_0651       | c0677          | fepD        | iron-enterobactin transporter membrane protein      |
| i02_0652       | c0678          | ybdA        | enterobactin exporter EntS                          |
| i02_0653       | c0679          | fepB        | iron-enterobactin transporter periplasmic           |
| i02_0654       | c0680          | entC        | isochorismate synthase                              |
| i02_0655       | c0681          | entE        | enterobactin synthase subunit E                     |
| i02_0656       | c0682          | entB        | isochorismatase                                     |
| i02_0657       | c0683          | entA        | 2,3-dihydroxybenzoate-2,3-dehydrogenase             |
| i02_0658       | c0684          | ybdB        | hypothetical protein                                |
| i02_0659       | c0685          | cstA        | carbon starvation protein A                         |
| i02_0660       | c0686          | /           | hypothetical protein                                |
| i02_0661       | c0687          | ybdH        | hypothetical protein                                |
| i02_0662       | c0688          | ybdL        | putative aminotransferase                           |
| i02_0663       | c0689          | /           | hypothetical protein                                |
| i02_0664       | c0690          | /           | hypothetical protein                                |

| <b>Clone D</b> | <b>CFT 073</b> | <b>Gene</b> | <b>Product</b>                                             |
|----------------|----------------|-------------|------------------------------------------------------------|
| i02_0665       | c0691          | ybdO        | putative transcriptional regulator YbdO                    |
| i02_0666       | c0692          | dsbG        | disulfide isomerase/thiol-disulfide oxidase                |
|                | c0693          | /           | hypothetical protein                                       |
| i02_0667       | c0694          | ahpC        | alkyl hydroperoxide reductase subunit C                    |
| i02_0668       | c0695          | ahpF        | Alkyl hydroperoxide reductase subunit F                    |
| i02_0669       | c0696          | ybdQ        | hypothetical protein                                       |
|                | c0697          | /           | hypothetical protein                                       |
| i02_0670       | c0698          | rnk         | nucleoside diphosphate kinase regulator                    |
| i02_0671       | c0699          | rna         | ribonuclease I                                             |
| i02_0672       | c0700          | ybdS        | citrate transporter                                        |
| i02_0673       | c0701          | citG        | triphosphoribosyl-dephospho-CoA synthase                   |
|                | c0703          | /           | hypothetical protein                                       |
| i02_0674       | c0702          | citX        | apo-citrate lyase phosphoribosyl-dephospho-CoA transferase |
|                | c0705          | /           | hypothetical protein                                       |
| i02_0675       | c0704          | citF        | citrate lyase alpha chain                                  |
| i02_0676       | c0706          | citE        | citrate lyase beta chain                                   |
| i02_0677       | c0709          | citC        | [citrate [pro-3S]-lyase] ligase                            |
| i02_0678       | c0710          | citA        | sensor kinase dpiB                                         |
| i02_0679       | c0711          | dpiA        | two-component response regulator DpiA                      |
| i02_0680       | c0712          | dcuC        | C4-dicarboxylate transporter DcuC                          |
| i02_0681       | c0713          | pagP        | palmitoyl transferase                                      |
| i02_0682       | c0714          | cspE        | cold shock protein CspE                                    |
| i02_0683       | c0715          | ccrB        | camphor resistance protein CrcB                            |
| i02_0684       | c0716          | ybeM        | putative amidase                                           |
| i02_0685       | c0717          | tatE        | twin arginine translocase protein E                        |
| i02_0686       | c0718          | lipA        | lipoyl synthase                                            |
| i02_0687       | c0719          | /           | hypothetical protein                                       |
| i02_0688       | c0720          | lipB        | lipoyltransferase                                          |
| i02_0689       | c0721          | ybeD        | hypothetical protein                                       |
| i02_0690       | c0722          | dacA        | D-alanyl-D-alanine carboxypeptidase fraction A             |
| i02_0691       | c0723          | /           | hypothetical protein                                       |
| i02_0692       | c0724          | rlpA        | rare lipoprotein A                                         |
| i02_0693       | c0725          | mrdB        | cell wall shape-determining protein                        |
| i02_0694       | c0726          | mrDA        | penicillin-binding protein 2                               |
| i02_0695       | c0727          | ybeA        | rRNA large subunit methyltransferase                       |
| i02_0696       | c0728          | ybeB        | hypothetical protein                                       |
| i02_0697       |                | /           | hypothetical protein                                       |
| i02_0698       | c0729          | phpB        | Alpha-ribazole-5'-phosphate phosphatase                    |
| i02_0699       | c0730          | nadD        | nicotinic acid mononucleotide                              |
| i02_0700       | c0731          | holA        | DNA polymerase III subunit delta                           |
| i02_0701       | c0732          | rlpB        | LPS-assembly lipoprotein RlpB                              |
| i02_0702       | c0733          | leuS        | leucyl-tRNA synthetase                                     |
| i02_0703       | c0734          | ybeL        | hypothetical protein                                       |
| i02_0704       | c0735          | rihA        | ribonucleoside hydrolase 1                                 |
| i02_0705       | c0736          | gltL        | glutamate/aspartate transport ATP-binding component        |
| i02_0706       | c0737          | gltK        | glutamate/aspartate transport system permease component    |
| i02_0707       | c0738          | gltJ        | glutamate/aspartate transport system permease component    |
| i02_0708       | c0739          | ybeJ        | glutamate and aspartate transporter subunit                |

| <b>Clone D</b> | <b>CFT 073</b> | <b>Gene</b> | <b>Product</b>                                               |
|----------------|----------------|-------------|--------------------------------------------------------------|
| i02_0709       | c0740          | /           | hypothetical protein                                         |
| i02_0710       | c0741          | /           | hypothetical protein                                         |
| i02_0711       | c0742          | Int         | apolipoprotein N-acyltransferase                             |
| i02_0712       | c0743          | ybeX        | magnesium and cobalt efflux protein corC                     |
| i02_0713       | c0744          | ybeY        | putative metalloprotease                                     |
| i02_0715       | c0746          | /           | hypothetical protein                                         |
| i02_0714       | c0745          | ybeZ        | PhoH-like protein                                            |
| i02_0716       | c0747          | yleA        | hypothetical protein                                         |
| i02_0717       | c0748          | ubiF        | 2-octaprenyl-3-methyl-6-methoxy-1,4-benzoquinone hydroxylase |
| i02_0718       | c0749          | asnB        | asparagine synthetase B                                      |
| i02_0719       | c0750          | nagD        | UMP phosphatase                                              |
| i02_0720       | c0751          | nagC        | N-acetylglucosamine repressor                                |
| i02_0721       | c0752          | nagA        | N-acetylglucosamine-6-phosphate deacetylase                  |
| i02_0722       | c0753          | nagB        | glucosamine-6-phosphate deaminase                            |
| i02_0723       | c0754          | /           | hypothetical protein                                         |
| i02_0724       | c0755          | nagE        | N-acetyl glucosamine specific PTS system                     |
| i02_0725       | c0756          | /           | hypothetical protein                                         |
| i02_0726       | c0757          | /           | hypothetical protein                                         |
| i02_0727       | c0758          | /           | hypthetical protein                                          |
| i02_0728       | c0759          | /           | hypthetical protein                                          |
| i02_0729       | c0760          | /           | hypothetical protein                                         |
| i02_0731       | c0761          | /           | putative dihydrodipicolinate synthase                        |
| i02_0732       | c0762          | /           | putative alcohol dehydrogenase                               |
| i02_0733       | c0763          | /           | putative inner membrane protein                              |
| i02_0734       | c0764          | pdxA        | 4-hydroxythreonine-4-phosphate dehydrogenase 2               |
| i02_0735       | c0765          | /           | putative transcriptional regulator                           |
| i02_0736       | c0766          | glnS        | glutaminyl-tRNA synthetase                                   |
| -              | c0767          | /           | hypothetical protein                                         |
| i02_0737       | c0768          | ybfM        | hypothetical protein                                         |
| i02_0738       | c0769          | ybfN        | lipoprotein ybfN precursor                                   |
| i02_0739       | c0770          | fur         | ferric uptake regulator                                      |
| i02_0740       | c0771          | fldA        | flavodoxin FldA                                              |
| i02_0741       | c0772          | ybfE        | LexA regulated protein                                       |
| i02_0742       | c0773          | ybfF        | hypothetical protein                                         |
| i02_0743       | c0774          | seqA        | replication initiation regulator SeqA                        |
| i02_0744       | c0775          | pgm         | phosphoglucomutase                                           |
| i02_0745       | c0776          | potE        | putrescine transporter                                       |
| i02_0746       | c0777          | speF        | ornithine decarboxylase                                      |
| i02_0747       | c0778          | /           | hypothetical protein                                         |
| i02_0748       |                | /           | hypothetical protein                                         |
| i02_0749       |                | /           | conserved hypothetical protein                               |
| i02_0750       | c0779          | kdpE        | DNA-binding transcriptional activator KdpE                   |
| i02_0751       | c0780          | kdpD        | sensor protein KdpD                                          |
| i02_0752       | c0781          | kdpC        | potassium-transporting ATPase subunit C                      |
| i02_0753       | c0782          | kdpB        | potassium-transporting ATPase subunit B                      |
| i02_0754       | c0783          | kdpA        | potassium-transporting ATPase subunit A                      |
| i02_0755       | c0784          | /           | hypothetical protein                                         |
| i02_0756       | c0785          | ybfA        | hypothetical protein                                         |
| i02_0757       | c0786          | ybgA        | hypothetical protein                                         |
| i02_0758       | c0787          | phrB        | deoxyribodipyrimidine photolyase                             |



| <b>Clone D</b> | <b>CFT 073</b> | <b>Gene</b> | <b>Product</b>                                        |
|----------------|----------------|-------------|-------------------------------------------------------|
| i02_0759       | c0788          | ybgH        | putative transporter YbgH                             |
| i02_0760       | c0789          | ybgI        | putative hydrolase-oxidase                            |
| i02_0761       | c0790          | ybgJ        | hypothetical protein                                  |
| i02_0762       | c0791          | ybgK        | hypothetical protein                                  |
| i02_0763       | c0792          | ybgL        | LamB/YcsF family protein                              |
| i02_0764       | c0793          | nei         | endonuclease VIII                                     |
| i02_0765       | c0794          | abrB        | AbrB protein                                          |
| i02_0766       | c0795          | /           | hypothetical protein                                  |
| i02_0768       | c0797          | /           | hypothetical protein                                  |
| i02_0767       | c0796          | gltA        | type II citrate synthase                              |
| i02_0769       | c0798          | sdhC        | succinate dehydrogenase cytochrome b556 large subunit |
|                | c0799          | /           | hypothetical protein                                  |
| i02_0770       | c0800          | sdhD        | succinate dehydrogenase cytochrome b556 small subunit |
| i02_0771       | c0801          | sdhA        | succinate dehydrogenase flavoprotein subunit          |
| i02_0772       | c0802          | sdhB        | succinate dehydrogenase iron-sulfur subunit           |
| i02_0773       | c0803          | sucA        | 2-oxoglutarate dehydrogenase E1 component             |
| i02_0774       | c0804          | sucB        | dihydrolipoamide succinyltransferase                  |
| i02_0775       | c0805          | sucC        | succinyl-CoA synthetase subunit beta                  |
| i02_0776       | c0806          | sucD        | succinyl-CoA synthetase subunit alpha                 |
| i02_0777       | c0807          | /           | hypothetical protein                                  |
| i02_0778       | c0808          | /           | hypothetical protein                                  |
| i02_0779       | c0809          | /           | hypothetical protein                                  |
| i02_0780       | c0810          | /           | hypothetical protein                                  |
| i02_0781       | c0811          | cydA        | cytochrome D ubiquinol oxidase subunit I              |
| i02_0782       | c0812          | cydB        | cytochrome D ubiquinol oxidase subunit II             |
|                | c0813          | /           | hypothetical protein                                  |
| i02_0783       |                | /           | hypothetical protein                                  |
| i02_0784       | c0814          | ybgE        | hypothetical protein                                  |
| i02_0785       | c0815          | ybgC        | acyl-CoA thioester hydrolase YbgC                     |
| i02_0786       | c0816          | tolQ        | colicin uptake protein TolQ                           |
| i02_0787       | c0817          | tolR        | colicin uptake protein TolR                           |
| i02_0788       | c0818          | tolA        | cell envelope integrity inner membrane protein        |
| i02_0789       | c0819          | tolB        | translocation protein TolB                            |
|                | c0820          | /           | hypothetical protein                                  |
| i02_0790       | c0821          | pal         | peptidoglycan-associated outer membrane               |
| i02_0791       | c0822          | ybgF        | hypothetical protein                                  |
| i02_0791       | c0823          | /           | hypothetical protein                                  |
| i02_0792       | c0824          | /           | hypothetical protein                                  |
| i02_0793       | c0825          | nadA        | quinolinate synthetase                                |
| i02_0794       | c0826          | pnuC        | protein pnuC                                          |
| i02_0795       | c0827          | /           | hypothetical protein                                  |
|                | c0828          | /           | hypothetical protein                                  |
| i02_0796       | c0829          | ybgS        | hypothetical protein                                  |
| i02_0797       | c0830          | aroG        | phospho-2-dehydro-3-deoxyheptonate aldolase           |
| i02_0798       | c0831          | gpmA        | phosphoglyceromutase                                  |
| i02_0799       | c0832          | galM        | aldose 1-epimerase                                    |
| i02_0800       | c0833          | galK        | galactokinase                                         |
| i02_0801       | c0834          | galT        | galactose-1-phosphate uridylyltransferase             |
| i02_0802       | c0835          | galE        | UDP-galactose-4-epimerase                             |

| Clone D  | CFT 073 | Gene | Product                                                            |
|----------|---------|------|--------------------------------------------------------------------|
| i02_0803 | c0836   | modF | putative molybdenum transport ATP-binding protein                  |
| i02_0804 | c0837   | modE | DNA-binding transcriptional regulator ModE                         |
| i02_0805 | c0838   | ybhT | hypothetical protein                                               |
| i02_0806 | c0839   | /    | hypothetical protein                                               |
| i02_0807 | c0840   | modA | molybdate transporter periplasmic protein                          |
| i02_0808 | c0841   | modB | molybdate ABC transporter permease protein                         |
| i02_0809 | c0842   | modC | molybdate transporter ATP-binding protein                          |
| i02_0810 | c0843   | ybhA | phosphotransferase                                                 |
| i02_0811 | c0844   | ybhE | 6-phosphogluconolactonase                                          |
| i02_0812 | c0845   | ybhD | putative transcriptional regulator YbhD                            |
| i02_0813 | c0846   | ybhH | hypothetical protein                                               |
| i02_0814 | c0847   | ybhI | hypothetical protein                                               |
| i02_0815 | c0848   | ybhJ | hypothetical protein                                               |
| i02_0816 | c0849   | ybhC | putative pectinesterase                                            |
| i02_0817 | c0850   | ybhB | putative kinase inhibitor protein                                  |
| i02_0818 | c0851   | gipA | Peyer's patch-specific virulence factor GipA                       |
|          | c0852   | /    | hypothetical protein                                               |
|          | c0854   | /    | hypothetical protein                                               |
| i02_0820 | c0853   | bioA | adenosylmethionine-8-amino-7-oxononanoate aminotransferase monomer |
| i02_0821 | c0855   | bioB | biotin synthase                                                    |
| i02_0822 | c0856   | bioF | 8-amino-7-oxononanoate synthase                                    |
| i02_0823 | c0857   | bioC | putative methyltransferase                                         |
| i02_0824 | c0858   | bioD | dithiobiotin synthetase                                            |
| i02_0825 | c0859   | /    | hypothetical protein                                               |
| i02_0826 | c0860   | uvrB | excinuclease ABC subunit B                                         |
| i02_0827 | c0861   | ybhK | hypothetical protein                                               |
| i02_0828 | c0862   | moaA | molybdenum cofactor biosynthesis protein A                         |
| i02_0829 | c0863   | moaB | molybdenum cofactor biosynthesis protein B                         |
| i02_0831 | c0865   | moaC | molybdenum cofactor biosynthesis protein C                         |
| i02_0830 | c0864   | /    | hypothetical protein                                               |
| i02_0832 | c0866   | moaD | molybdopterin synthase small subunit                               |
| i02_0833 | c0867   | moaE | molybdopterin synthase large subunit                               |
| i02_0834 | c0868   | ybhL | hypothetical protein                                               |
| i02_0835 | c0869   | /    | hypothetical protein                                               |
| i02_0836 | c0870   | ybhM | hypothetical protein                                               |
| i02_0837 | c0871   | ybhN | hypothetical protein                                               |
| i02_0838 | c0872   | ybhO | cardiolipin synthase 2                                             |
| i02_0839 | c0873   | ybhP | hypothetical protein                                               |
| i02_0840 | c0874   | ybhQ | hypothetical protein                                               |
| i02_0841 | c0875   | ybhR | hypothetical protein                                               |
| i02_0842 | c0876   | ybhS | hypothetical protein                                               |
| i02_0843 | c0877   | ybhF | ABC transporter ATP-binding protein                                |
| i02_0844 | c0878   | ybhG | hypothetical protein                                               |
| i02_0845 | c0879   | ybiH | putative DNA-binding transcriptional regulator                     |
| i02_0846 | c0880   | rhIE | ATP-dependent RNA helicase RhIE                                    |
| i02_0848 | c0883   | dinG | ATP-dependent DNA helicase DinG                                    |
| i02_0847 | c0882   | /    | hypothetical protein                                               |
| i02_0849 | c0884   | ybiB | glycosyl transferase family protein                                |
| i02_0850 | c0885   | ybiC | hypothetical protein                                               |
| i02_0851 | c0886   | ybiJ | hypothetical protein                                               |

| <b>Clone D</b> | <b>CFT 073</b> | <b>Gene</b> | <b>Product</b>                                       |
|----------------|----------------|-------------|------------------------------------------------------|
| i02_0852       | c0888          | /           | hypothetical protein                                 |
| i02_0853       | c0889          | ybiX        | putative hydroxylase                                 |
| i02_0854       | c0890          | ybiL        | catecholate siderophore receptor Fiu                 |
| i02_0855       | c0891          | ybiM        | hypothetical protein                                 |
| i02_0856       | c0892          | ybiN        | putative SAM-dependent methyltransferase             |
| i02_0857       | c0893          | ybiO        | hypothetical protein                                 |
| i02_0858       | c0894          | glnQ        | glutamine ABC transporter ATP-binding protein        |
| i02_0859       | c0895          | glnP        | glutamine ABC transporter permease protein           |
| i02_0860       | c0896          | glnH        | glutamine ABC transporter periplasmic protein        |
| i02_0861       | c0897          | /           | hypothetical protein                                 |
| i02_0862       | c0898          | dps         | DNA starvation/stationary phase protection           |
| i02_0863       | c0899          | ybiF        | threonine and homoserine efflux system               |
| i02_0864       | c0900          | ompX        | outer membrane protein X                             |
| i02_0865       | c0901          | ybiP        | hypothetical protein                                 |
| i02_0866       | c0902          | /           | hypothetical protein                                 |
| i02_0867       | c0903          | /           | manganese transport regulator MntR                   |
| i02_0868       | c0904          | ybiR        | hypothetical protein                                 |
| i02_0869       | c0905          | ybiS        | hypothetical protein                                 |
| i02_0870       | c0906          | ybiT        | ABC transporter ATP-binding protein                  |
| i02_0871       | c0907          | ybiV        | hypothetical protein                                 |
| i02_0872       | c0908          | ybiW        | putative formate acetyltransferase 3                 |
| i02_0873       | c0909          | /           | putative pyruvate formate-lyase 3 activating protein |
| i02_0874       | c0910          | mipB        | fructose-6-phosphate aldolase                        |
| i02_0875       | c0911          | moeB        | molybdopterin biosynthesis protein MoeB              |
| i02_0876       | c0912          | moeA        | molybdopterin biosynthesis protein MoeA              |
| i02_0877       | c0913          | ybiK        | L-asparaginase                                       |
| i02_0878       | c0914          | yliA        | glutathione transporter ATP-binding protein          |
| i02_0879       | c0915          | /           | putative binding protein yliB precursor              |
| i02_0880       | c0916          | yliC        | ABC transporter permease                             |
| i02_0881       | c0917          | yliD        | ABC transporter permease                             |
| i02_0882       | c0918          | yliE        | hypothetical protein                                 |
| i02_0883       | c0919          | yliF        | membrane protein yliF                                |
| i02_0884       | c0920          | yliG        | hypothetical protein                                 |
| i02_0885       | c0921          | bssR        | biofilm formation regulatory protein BssR            |
| i02_0886       | c0922          | yliI        | hypothetical protein                                 |
| i02_0887       | c0923          | yliJ        | GST-like protein yliJ                                |
| i02_0888       | c0924          | dacC        | D-alanyl-D-alanine carboxypeptidase fraction C       |
| i02_0889       | c0925          | deoR        | DNA-binding transcriptional repressor DeoR           |
| i02_0890       | c0926          | ybjG        | undecaprenyl pyrophosphate phosphatase               |
| i02_0891       | c0927          | cmr         | multidrug translocase mdfA                           |
| i02_0892       | c0928          | ybjH        | hypothetical protein                                 |
| i02_0893       | c0929          | /           | hypothetical protein                                 |
| i02_0895       | c0931          | ybjK        | hypothetical protein                                 |
| i02_0894       | c0930          | ybjJ        | hypothetical protein                                 |
| -              | c0932          | intT        | integrase for prophage                               |
| -              | c0933          | /           | hypothetical protein                                 |
| -              | c0934          | /           | hypothetical protein                                 |
| -              | c0935          | coxT        | putative regulator for prophage                      |
| -              | c0936          | /           | hypothetical protein                                 |
| -              | c0937          | /           | hypothetical protein                                 |
| -              | c0938          | /           | hypothetical protein                                 |

| Clone D  | CFT 073 | Gene | Product                                    |
|----------|---------|------|--------------------------------------------|
| -        | c0939   | /    | hypothetical protein                       |
| -        | c0940   | /    | hypothetical protein                       |
| -        | c0941   | /    | DNA adenine methylase                      |
| -        | c0942   | /    | putative replication protein for prophage  |
| -        | c0943   | /    | hypothetical protein                       |
| -        | c0944   | /    | hypothetical protein                       |
| -        | c0945   | /    | hypothetical protein                       |
| -        | c0946   | /    | hypothetical protein                       |
| -        | c0947   | /    | capsid portal protein                      |
| -        | c0948   | /    | terminase, ATPase subunit                  |
| -        | c0949   | /    | hypothetical protein                       |
| -        | c0950   | /    | putative capsid scaffolding protein        |
| -        | c0951   | /    | hypothetical protein                       |
| -        | c0952   | /    | major capsid protein                       |
| -        | c0953   | /    | terminase, endonuclease subunit            |
| -        | c0954   | /    | putative capsid completion protein         |
| -        | c0955   | /    | phage tail protein                         |
| -        | c0956   | /    | secretory protein                          |
| -        | c0957   | /    | Fels-2 prophage: prophage lysozyme         |
| -        | c0958   | /    | hypothetical protein                       |
| -        | c0959   | /    | putative regulatory protein                |
| -        | c0960   | /    | putative phage tail protein                |
| -        | c0961   | /    | hypothetical protein                       |
| -        | c0962   | /    | putative phage tail protein                |
| -        | c0963   | /    | putative Phage baseplate assembly protein  |
| -        | c0964   | /    | Phage baseplate assembly protein           |
| -        | c0965   | /    | Phage baseplate assembly protein           |
| -        | c0966   | /    | putative phage tail protein                |
| -        | c0967   | /    | hypothetical protein                       |
| -        | c0968   | /    | variable tail fibre protein                |
| -        | c0969   | yfdK | hypothetical protein                       |
| -        | c0970   | /    | hypothetical protein                       |
| -        | c0971   | /    | major tail sheath protein                  |
| -        | c0972   | /    | putative tail fiber component of prophage  |
| -        | c0973   | /    | hypothetical protein                       |
| -        | c0974   | /    | putative phage tail protein                |
| -        | c0975   | /    | hypothetical protein                       |
| -        | c0976   | /    | hypothetical protein                       |
| -        | c0977   | /    | putative tail fiber protein of prophage    |
| -        | c0978   | /    | putative regulator of late gene expression |
| -        | c0979   | ogrK | prophage P2 Ogr protein                    |
| i02_0896 | c0980   | ybjL | hypothetical protein                       |
| i02_0897 | c0981   | ybjM | hypothetical protein                       |
| i02_0898 | c0982   | grxA | glutaredoxin 1                             |
| i02_0899 | c0983   | ybjC | hypothetical protein                       |
| i02_0900 | c0984   | mdaA | nitroreductase A                           |
| i02_0901 | c0985   | rimK | ribosomal protein S6 modification protein  |
| i02_0902 | c0986   | ybjN | hypothetical protein                       |
| i02_0903 | c0987   | potF | putrescine transporter subunit             |
| i02_0904 | c0988   | potG | putrescine transporter ATP-binding subunit |
| i02_0905 | c0989   | potH | putrescine transporter subunit             |
| i02_0906 | c0990   | potI | putrescine transporter subunit             |

| <b>Clone D</b> | <b>CFT 073</b> | <b>Gene</b> | <b>Product</b>                                                                                 |
|----------------|----------------|-------------|------------------------------------------------------------------------------------------------|
| i02_0907       | c0991          | ybjO        | hypothetical protein                                                                           |
| i02_0908       | c0992          | rumB        | 23S rRNA methyluridine methyltransferase                                                       |
| i02_0909       | c0993          | artJ        | arginine-binding periplasmic protein 2                                                         |
| i02_0910       | c0994          | artM        | arginine transporter permease subunit ArtM                                                     |
| i02_0911       | c0995          | artQ        | arginine transporter permease subunit ArtQ                                                     |
| i02_0912       | c0996          | artI        | arginine-binding periplasmic protein 1                                                         |
| i02_0913       | c0997          | artP        | arginine transporter ATP-binding subunit                                                       |
| i02_0914       | c0998          | ybjP        | putative lipoprotein                                                                           |
| i02_0915       | c0999          | ybjQ        | hypothetical protein                                                                           |
| i02_0916       | c1000          | ybjR        | N-acetylmuramoyl-L-alanine amidase ybjR                                                        |
| i02_0917       | c1001          | /           | hypothetical protein                                                                           |
| i02_0918       | c1002          | ybjT        | hypothetical protein                                                                           |
| i02_0919       | c1003          | ybjU        | L-threonine aldolase                                                                           |
| i02_0920       | c1004          | poxB        | pyruvate dehydrogenase                                                                         |
| i02_0921       | c1005          | /           | HCP oxidoreductase, NADH-dependent                                                             |
| i02_0922       | c1006          | ybjW        | hydroxylamine reductase                                                                        |
| i02_0924       | c1008          | /           | hypothetical protein                                                                           |
| i02_0923       | c1007          | ybjE        | hypothetical protein                                                                           |
| i02_0925       | c1009          | aqpZ        | aquaporin Z                                                                                    |
| i02_0926       | c1010          | /           | hypothetical protein                                                                           |
| i02_0927       | c1011          | ybjD        | hypothetical protein                                                                           |
| i02_0928       | c1012          | ybjX        | hypothetical protein                                                                           |
| i02_0929       | c1013          | /           | hypothetical protein                                                                           |
| i02_0930       | c1014          | macA        | macrolide transporter subunit MacA                                                             |
| i02_0931       | c1016          | /           | hypothetical protein                                                                           |
| i02_0932       | c1017          | cspD        | stationary phase/starvation inducible regulatory<br>ATP-dependent Clp protease adaptor protein |
| i02_0933       | c1018          | clpS        | ClpS                                                                                           |
| i02_0934       | c1019          | clpA        | ATP-dependent Clp protease ATP-binding subunit                                                 |
| i02_0935       | c1021          | infA        | translation initiation factor IF-1                                                             |
| i02_0936       | c1022          | aat         | leucyl/phenylalanyl-tRNA--protein transferase                                                  |
| i02_0937       | c1023          | cydC        | cysteine/glutathione ABC transporter                                                           |
| i02_0938       | c1024          | cydD        | cysteine/glutathione ABC transporter                                                           |
| i02_0939       | c1025          | trxB        | thioredoxin reductase                                                                          |
| i02_0940       | c1026          | lrp         | leucine-responsive transcriptional regulator                                                   |
| i02_0941       | c1027          | ftsK        | DNA translocase FtsK                                                                           |
| i02_0942       | c1028          | lolA        | outer-membrane lipoprotein carrier protein                                                     |
| i02_0943       | c1029          | ycaJ        | recombination factor protein RarA                                                              |
| i02_0944       | c1030          | serS        | seryl-tRNA synthetase                                                                          |
| i02_0945       | c1031          | dmsA        | anaerobic dimethyl sulfoxide reductase chain A                                                 |
| i02_0946       | c1032          | dmsB        | anaerobic dimethyl sulfoxide reductase chain B                                                 |
| i02_0947       | c1033          | dmsC        | anaerobic dimethyl sulfoxide reductase chain C                                                 |
| i02_0948       | c1034          | ycaC        | hypothetical protein                                                                           |
|                | c1036          | /           | hypothetical protein                                                                           |
| i02_0949       | c1035          | /           | hypothetical protein                                                                           |
| i02_0950       | c1037          | ycaD        | putative MFS family transporter protein                                                        |
| i02_0951       | c1038          | pflA        | pyruvate formate lyase-activating enzyme 1                                                     |
|                | c1040          | /           | hypothetical protein                                                                           |
| i02_0952       |                | pflB        | PflB                                                                                           |
| i02_0954       | c1042          | focA_2      | formate transporter                                                                            |
| i02_0955       | c1043          | ycaO        | hypothetical protein                                                                           |
| i02_0956       | c1044          | ycaP        | hypothetical protein                                                                           |

| <b>Clone D</b> | <b>CFT 073</b> | <b>Gene</b> | <b>Product</b>                                          |
|----------------|----------------|-------------|---------------------------------------------------------|
| i02_0957       | c1045          | serC        | phosphoserine aminotransferase                          |
| i02_0958       | c1046          | aroA        | 3-phosphoshikimate 1-carboxyvinyltransferase            |
| i02_0959       | c1047          | ycaL        | putative metalloprotease ycaL                           |
| i02_0960       | c1048          | cmk         | cytidylate kinase                                       |
| i02_0961       | c1049          | rpsA        | 30S ribosomal protein S1                                |
| i02_0962       | c1050          | ihfB        | integration host factor subunit beta                    |
|                | c1051          | /           | hypothetical protein                                    |
| i02_0963       | c1052          | ycaI        | hypothetical protein                                    |
| i02_0964       | c1054          | msbA        | lipid transporter ATP-binding/permease protein          |
| i02_0965       |                | lpxK        | tetraacyldisaccharide 4'-kinase                         |
| i02_0966       | c1057          | ycaQ        | hypothetical protein                                    |
| i02_0967       | c1058          | ycaR        | hypothetical protein                                    |
| i02_0968       | c1059          | kdsB        | 3-deoxy-manno-octulosonate cytidyltransferase           |
| i02_0969       | c1060          | ycbJ        | hypothetical protein                                    |
| i02_0970       | c1061          | ycbC        | hypothetical protein                                    |
| i02_0971       | c1062          | /           | hypothetical protein                                    |
| i02_0972       | c1063          | smtA        | putative metallothionein SmtA                           |
| i02_0973       | c1064          | mukF        | condesin subunit F                                      |
| i02_0974       | c1065          | mukE        | condesin subunit E                                      |
| i02_0975       | c1066          | mukB        | cell division protein MukB                              |
| i02_0976       | c1067          | ycbB        | hypothetical protein                                    |
| i02_0977       | c1068          | ycbK        | hypothetical protein                                    |
| i02_0978       | c1069          | ycbL        | hypothetical protein                                    |
| i02_0979       | c1070          | aspC        | aromatic amino acid aminotransferase                    |
| i02_0980       | c1071          | ompF        | outer membrane protein F                                |
| i02_0981       | c1072          | asnC        | asparaginyl-tRNA synthetase                             |
|                | c1074          | /           | hypothetical protein                                    |
| i02_0982       | c1073          | pncB        | nicotinate phosphoribosyltransferase                    |
| i02_0983       | c1075          | pepN        | aminopeptidase N                                        |
| i02_0984       | c1076          | ssuB        | aliphatic sulfonates transport ATP-binding component    |
| i02_0985       | c1077          | ssuC        | alkanesulfonate transporter permease subunit            |
| i02_0986       | c1078          | ycbN        | alkanesulfonate monooxygenase                           |
| i02_0987       | c1079          | ycbO        | alkanesulfonate transporter substrate-binding component |
| i02_0988       | c1080          | ycbP        | NAD(P)H-dependent FMN reductase                         |
| i02_0989       | c1081          | pyrD        | dihydroorotate dehydrogenase 2                          |
| i02_0990       | c1082          | ycbW        | hypothetical protein                                    |
| i02_0991       | c1083          | ycbX        | hypothetical protein                                    |
| i02_0992       | c1084          | rlmL        | 23S rRNA m(2)G2445 methyltransferase                    |
| i02_0993       | c1085          | uup         | ABC transporter ATPase component                        |
| i02_0994       | c1086          | pqiA        | paraquat-inducible protein A                            |
| i02_0995       | c1087          | pqiB        | paraquat-inducible protein B                            |
| i02_0996       | c1088          | ymbA        | hypothetical protein                                    |
| i02_0997       | c1089          | /           | hypothetical protein                                    |
| i02_0998       | c1090          | fabA        | 3-hydroxydecanoyl-(acyl carrier protein)                |
| i02_0999       | c1091          | /           | putative protease La-like protein                       |
| i02_1000       | c1092          | ycbG        | hypothetical protein                                    |
| i02_1001       | c1093          | ompA        | outer membrane protein A                                |
| i02_1002       | c1094          | /           | hypothetical protein                                    |
| i02_1003       | c1095          | sulA        | SOS cell division inhibitor                             |
| i02_1004       | c1096          | yccR        | hypothetical protein                                    |

| <b>Clone D</b> | <b>CFT 073</b> | <b>Gene</b> | <b>Product</b>                                  |
|----------------|----------------|-------------|-------------------------------------------------|
| i02_1005       | c1097          | yccS        | hypothetical protein                            |
| i02_1006       | c1098          | yccF        | hypothetical protein                            |
| i02_1007       | c1099          | helD        | DNA helicase IV                                 |
| i02_1008       | c1100          | mgsA        | methylglyoxal synthase                          |
| i02_1009       | c1101          | yccT        | hypothetical protein                            |
| i02_1010       | c1102          | /           | hypothetical protein                            |
|                | c1103          | /           | hypothetical protein                            |
| i02_1011       | c1104          | yccV        | hypothetical protein                            |
| i02_1013       | c1106          | /           | putative acylphosphatase                        |
| i02_1012       | c1105          | yccW        | hypothetical protein                            |
| i02_1014       | c1107          | yccK        | sulfur transfer protein TusE                    |
| i02_1015       | c1110          | yccA        | hypothetical protein                            |
| i02_1017       | c1113          | hyaA        | hydrogenase-1 small chain precursor             |
| i02_1016       | c1112          | /           | hypothetical protein                            |
| i02_1018       | c1114          | hyaB        | hydrogenase 1 large subunit                     |
| i02_1019       | c1115          | hyaC        | hydrogenase 1 b-type cytochrome subunit         |
| i02_1020       | c1116          | hyaD        | hydrogenase 1 maturation protease               |
| i02_1021       | c1117          | hyaE        | hydrogenase-1 operon protein HyaE               |
| i02_1022       | c1118          | hyaF        | hydrogenase-1 operon protein HyaF               |
| i02_1023       | c1119          | appC        | cytochrome bd-II oxidase subunit I              |
| i02_1024       | c1120          | appB        | cytochrome bd-II oxidase subunit II             |
| i02_1025       | c1121          | appA        | phosphoanhydride phosphorylase                  |
| i02_1026       | c1122          | cspH        | cold shock-like protein cspH                    |
| i02_1027       | c1123          | cspG        | cold shock protein CspG                         |
| i02_1028       | c1124          | sfa         | cold shock gene                                 |
| i02_1029       | c1125          | /           | GnsB protein                                    |
|                | c1126          | /           | hypothetical protein                            |
| i02_1030       | c1127          | yccM        | putative electron transport protein yccM        |
| i02_1031       | c1128          | torS        | hybrid sensory histidine kinase TorS            |
| i02_1032       | c1130          | torT        | TMAO reductase system periplasmic protein TorT  |
| i02_1033       | c1131          | torR        | DNA-binding transcriptional regulator TorR      |
| i02_1034       | c1132          | torC        | cytochrome c-type protein torC                  |
| i02_1035       | c1133          | torA        | trimethylamine-N-oxide reductase 1 precursor    |
| i02_1036       | c1134          | torD        | chaperone protein TorD                          |
| i02_1037       | c1135          | yccD        | chaperone-modulator protein CbpM                |
| i02_1038       | c1136          | cbpA        | curved DNA-binding protein CbpA                 |
| i02_1039       | c1137          | agp         | glucose-1-phosphatase/inositol phosphatase      |
| i02_1039       | c1138          | /           | hypothetical protein                            |
| i02_1040       | c1139          | yccJ        | hypothetical protein                            |
| i02_1041       | c1140          | wrbA        | TrpR binding protein WrbA                       |
| i02_1042       | c1141          | /           | hypothetical protein                            |
|                | c1142          | /           | hypothetical protein                            |
| i02_1043       | c1143          | ycdG        | putative purine permease ycdG                   |
| i02_1044       | c1144          | /           | putative flavin:NADH reductase ycdH             |
| i02_1045       | c1145          | /           | hypothetical protein                            |
| i02_1046       | c1146          | ycdJ        | hypothetical protein                            |
| i02_1047       | c1147          | ycdK        | hypothetical protein                            |
| i02_1048       | c1148          | ycdL        | isochorismatase family protein ycdL             |
| i02_1049       | c1149          | /           | putative monooxygenase ycdM                     |
| i02_1050       | c1150          | ycdC        | putative transcriptional regulator YcdC         |
| i02_1051       | c1151          | putA        | trifunctional transcriptional regulator/proline |
| i02_1052       | c1152          | /           | hypothetical protein                            |

| <b>Clone D</b> | <b>CFT 073</b> | <b>Gene</b> | <b>Product</b>                               |
|----------------|----------------|-------------|----------------------------------------------|
| i02_1053       | c1153          | /           | hypothetical protein                         |
| i02_1054       | c1154          | putP        | Sodium/proline symporter                     |
| i02_1055       | c1155          | /           | putative cytochrome                          |
| i02_1056       | c1156          | ycdO        | hypothetical protein                         |
| i02_1057       | c1157          | ycdB        | hypothetical protein                         |
| i02_1058       | c1158          | /           | hypothetical protein                         |
| i02_1059       | c1159          | phoH        | hypothetical protein                         |
| i02_1060       | c1160          | ycdP        | hypothetical protein                         |
| i02_1061       | c1161          | ycdQ        | N-glycosyltransferase PgaC                   |
| i02_1062       | c1162          | ycdR        | lipoprotein ycdR precursor                   |
| i02_1063       | c1163          | pgaA        | outer membrane protein PgaA                  |
| i02_1064       | c1164          | ycdT        | hypothetical protein                         |
| i02_1065       | c1165          | /           | P4 family integrase                          |
| i02_1066       | c1166          | /           | hypothetical protein                         |
| i02_1067       | c1167          | /           | hypothetical protein                         |
| i02_1068       | c1168          | /           | hypothetical protein                         |
| i02_1069       | c1169          | alpA        | prophage CP4-57 regulatory protein alpA      |
| i02_1070       | c1170          | /           | hypothetical protein                         |
| i02_1071       | c1171          | /           | hypothetical protein                         |
|                | c1172          | /           | hypothetical protein                         |
| i02_1072       | c1173          | /           | hypothetical protein                         |
| i02_1073       | c1174          | /           | hypothetical protein                         |
| i02_1074       | c1175          | /           | putative aminotransferase                    |
| i02_1075       | c1176          | /           | hypothetical protein                         |
| i02_1076       | c1183          | /           | hypothetical protein                         |
| i02_1077       | c1184          | /           | hypothetical protein                         |
|                | c1185          | /           | hypothetical protein                         |
| i02_1079       | c1186          | /           | 3-oxoacyl-(acyl carrier protein) synthase II |
| i02_1080       | c1187          | fabG        | 3-ketoacyl-(acyl-carrier-protein) reductase  |
| i02_1081       | c1188          | /           | hypothetical protein                         |
| i02_1082       | c1189          | /           | 3-oxoacyl-(acyl carrier protein) synthase I  |
| i02_1083       | c1190          | /           | hypothetical protein                         |
| i02_1084       | c1191          | /           | hypothetical protein                         |
| i02_1085       | c1192          | /           | hypothetical protein                         |
| i02_1086       | c1193          | /           | hypothetical protein                         |
| i02_1087       | c1194          | /           | hypothetical protein                         |
| i02_1088       | c1195          | /           | hypothetical protein                         |
| i02_1089       | c1196          | /           | hypothetical protein                         |
| i02_1090       | c1197          | /           | hypothetical protein                         |
| i02_1091       | c1198          | /           | hypothetical protein                         |
| i02_1092       | c1199          | /           | acyl carrier protein                         |
| i02_1093       | c1200          | /           | putative acyl carrier protein                |
| i02_1094       | c1201          | /           | putative phospholipid biosynthesis           |
| i02_1095       | c1202          | /           | hypothetical protein                         |
| i02_1096       | c1203          | /           | putative O-methyltransferase                 |
| i02_1097       | c1204          | /           | hypothetical protein                         |
| i02_1098       | c1205          | /           | hypothetical protein                         |
|                | c1206          | /           | hypothetical protein                         |
| i02_1099       | c1207          | /           | hypothetical protein                         |
| i02_1100       | c1208          | /           | hypothetical protein                         |
| i02_1101       | c1209          | /           | hypothetical protein                         |
|                | c1210          | /           | hypothetical protein                         |



| <b>Clone D</b> | <b>CFT 073</b> | <b>Gene</b> | <b>Product</b>                                        |
|----------------|----------------|-------------|-------------------------------------------------------|
| i02_1103       |                | /           | hypothetical protein                                  |
| i02_1104       |                | /           | conserved hypothetical protein                        |
| i02_1106       | c1213          | /           | hypothetical protein                                  |
| i02_1105       |                | /           | hypothetical protein                                  |
| i02_1107       | c1214          | /           | Cea protein                                           |
| i02_1108       | c1215          | /           | entry exclusion protein 2                             |
| i02_1109       | c1216          | /           | hypothetical protein                                  |
| i02_1110       | c1217          | /           | hypothetical protein                                  |
| i02_1111       | c1218          | /           | hypothetical protein                                  |
| i02_1112       | c1219          | /           | putative transposase                                  |
| i02_1113       |                | /           | conserved hypothetical protein                        |
| i02_1114       | c1220          | /           | phospho-2-dehydro-3-deoxyheptonate aldolase           |
| i02_1115       | c1221          | /           | hypothetical protein                                  |
| i02_1116       | c1222          | /           | hypothetical protein                                  |
| i02_1117       | c1224          | /           | transposase insF                                      |
| i02_1118       | c1225          | /           | transposase insE                                      |
| i02_1119       | c1227          | mchB        | MchB protein                                          |
| i02_1120       | c1229          | mchC        | MchC protein                                          |
| i02_1121       | c1230          | mchD        | MchD protein                                          |
| i02_1122       | c1231          | mchE        | microcin H47 secretion protein                        |
| i02_1123       | c1232          | mchF        | microcin H47 secretion ATP-binding protein            |
| i02_1124       |                | /           | conserved domain protein                              |
| i02_1125       | c1233          | /           | hypothetical protein                                  |
| i02_1126       | c1234          | /           | hypothetical protein                                  |
| i02_1127       | c1235          | /           | hypothetical protein                                  |
| i02_1128       | c1236          | /           | hypothetical protein                                  |
| i02_1129       |                | /           | hypothetical protein                                  |
| i02_1130       | c1237          | sfaC        | putative F1C and S fimbrial switch regulatory protein |
| i02_1131       | c1238          | sfaB        | putative F1C and S fimbrial switch regulatory protein |
| i02_1132       | c1239          | focA        | F1C major fimbrial subunit precursor                  |
| i02_1133       | c1240          | sfaD        | putative minor F1C fimbrial subunit precursor         |
| i02_1134       | c1241          | focC        | F1C periplasmic chaperone                             |
| i02_1135       | c1242          | focD        | F1C fimbrial usher                                    |
| i02_1136       | c1243          | focF        | F1C minor fimbrial subunit F precursor                |
| i02_1137       | c1244          | focG        | F1C minor fimbrial subunit protein G precursor        |
| i02_1138       | c1245          | focH        | F1C putative fimbrial adhesin precursor               |
| i02_1139       |                | /           | conserved hypothetical protein                        |
| i02_1140       | c1246          | /           | hypothetical protein                                  |
| i02_1141       | c1247          | focX        | putative regulatory protein                           |
| i02_1142       | c1248          | /           | hypothetical protein                                  |
| i02_1143       | c1249          | /           | hypothetical protein                                  |
| i02_1144       | c1250          | iroN        | outer membrane receptor FepA                          |
| i02_1145       | c1251          | iroE        | IroE protein                                          |
| i02_1146       | c1252          | iroD        | ferric enterochelin esterase                          |
| i02_1147       | c1253          | iroC        | ABC transporter ATP-binding protein                   |
| i02_1148       | c1254          | iroB        | putative glucosyltransferase                          |
| i02_1149       | c1255          | /           | hypothetical protein                                  |
| i02_1150       | c1256          | /           | hypothetical protein                                  |
| i02_1151       | c1257          | /           | hypothetical protein                                  |
| i02_1152       |                | /           | conserved hypothetical protein                        |

| Clone D  | CFT 073 | Gene | Product                                       |
|----------|---------|------|-----------------------------------------------|
| i02_1153 | c1258   | /    | hypothetical protein                          |
| i02_1154 | c1259   | /    | hypothetical protein                          |
| i02_1155 | c1260   | /    | putative transposase                          |
| -        | c1262   | /    | transposase IS629                             |
| -        | c1263   | /    | hypothetical protein                          |
| i02_1157 | c1261   | /    | hypothetical protein                          |
| i02_1157 | c1264   | /    | hypothetical protein                          |
| i02_1158 | c1265   | /    | Outer membrane heme/hemoglobin receptor       |
| i02_1159 | c1266   | /    | hypothetical protein                          |
| i02_1160 | c1267   | /    | hypothetical protein                          |
| i02_1161 | c1268   | /    | hypothetical protein                          |
| i02_1162 | c1269   | /    | hypothetical protein                          |
| i02_1163 | c1270   | /    | hypothetical protein                          |
| i02_1164 | c1271   | /    | hypothetical protein                          |
| i02_1165 | c1272   | /    | hypothetical protein                          |
| i02_1166 | c1273   | /    | antigen 43 precursor                          |
| i02_1167 | c1274   | /    | hypothetical protein                          |
| i02_1168 | c1275   | /    | hypothetical protein                          |
| i02_1169 | c1276   | /    | hypothetical protein                          |
| i02_1170 | c1277   | /    | hypothetical protein                          |
| i02_1171 | c1278   | /    | hypothetical protein                          |
| i02_1172 | c1279   | /    | hypothetical protein                          |
| i02_1173 | c1280   | /    | hypothetical protein                          |
|          | c1281   | /    | hypothetical protein                          |
| i02_1174 | c1282   | /    | putative radC-like protein yeeS               |
|          | c1284   | /    | hypothetical protein                          |
| i02_1175 | c1285   | /    | hypothetical protein                          |
|          | c1286   | /    | hypothetical protein                          |
|          | c1287   | /    | hypothetical protein                          |
| i02_1176 | c1288   | /    | hypothetical protein                          |
| i02_1177 | c1289   | /    | hypothetical protein                          |
| i02_1178 | c1290   | /    | hypothetical protein                          |
| -        | c1291   | /    | hypothetical protein                          |
| i02_1179 | c1292   | /    | hypothetical protein                          |
|          | c1293   | /    | hypothetical protein                          |
|          | c1294   | /    | hypothetical protein                          |
| i02_1181 | c1295   | ycdW | putative 2-hydroxyacid dehydrogenase ycdW     |
| i02_1182 | c1296   | ycdX | putative hydrolase                            |
| i02_1183 | c1297   | ycdY | hypothetical protein                          |
| i02_1184 | c1298   | ycdZ | hypothetical protein                          |
| i02_1185 | c1299   | csgG | curli production assembly/transport component |
| i02_1186 | c1300   | csgF | curli assembly protein CsgF                   |
| i02_1187 | c1301   | csgE | curli assembly protein CsgE                   |
| i02_1189 | c1303   | /    | hypothetical protein                          |
| i02_1188 | c1302   | csgD | DNA-binding transcriptional regulator CsgD    |
| i02_1190 | c1304   | /    | hypothetical protein                          |
| i02_1191 | c1305   | csgB | curlin minor subunit                          |
| i02_1192 | c1306   | csgA | cryptic curlin major subunit                  |
| i02_1193 | c1307   | csgC | putative autoagglutination protein            |
| i02_1194 | c1308   | ymdA | hypothetical protein                          |
| i02_1195 | c1309   | ymdB | hypothetical protein                          |
| i02_1196 | c1310   | ymdC | hypothetical protein                          |

| <b>Clone D</b> | <b>CFT 073</b> | <b>Gene</b> | <b>Product</b>                                   |
|----------------|----------------|-------------|--------------------------------------------------|
| i02_1197       | c1311          | mdoC        | glucans biosynthesis protein                     |
| i02_1198       | c1312          | /           | hypothetical protein                             |
| i02_1199       | c1313          | mdoG        | glucan biosynthesis protein G                    |
| i02_1200       | c1314          | mdoH        | glucosyltransferase MdoH                         |
| i02_1201       | c1315          | /           | hypothetical protein                             |
| i02_1202       | c1316          | yceK        | hypothetical protein                             |
|                | c1317          | /           | hypothetical protein                             |
| i02_1203       | c1318          | msyB        | hypothetical protein                             |
| i02_1204       | c1319          | yceE        | drug efflux system protein MdtG                  |
| i02_1205       | c1320          | htrB        | lipid A biosynthesis lauroyl acyltransferase     |
| i02_1206       | c1321          | yceA        | hypothetical protein                             |
| i02_1207       | c1322          | yceI        | hypothetical protein                             |
| i02_1209       | c1324          | /           | hypothetical protein                             |
| i02_1208       | c1323          | /           | cytochrome b561 2                                |
| i02_1210       | c1325          | yceO        | hypothetical protein                             |
| i02_1211       | c1326          | solA        | N-methyltryptophan oxidase                       |
| i02_1212       | c1327          | bssS        | biofilm formation regulatory protein BssS        |
| i02_1213       | c1328          | dinI        | DNA damage-inducible protein I                   |
| i02_1214       | c1329          | pyrC        | dihydroorotase                                   |
| i02_1215       | c1330          | yceB        | hypothetical protein                             |
| i02_1216       | c1331          | grxB        | glutaredoxin 2                                   |
| i02_1217       | c1332          | yceL        | multidrug resistance protein MdtH                |
| i02_1218       | c1333          | rimJ        | ribosomal-protein-S5-alanine                     |
| i02_1219       | c1334          | yceH        | hypothetical protein                             |
| i02_1220       |                | /           | hypothetical protein                             |
| i02_1221       | c1337          | /           | hypothetical protein                             |
| i02_1222       | c1338          | mviN        | virulence factor mviN-like protein               |
| i02_1223       | c1339          | flgN        | flagella synthesis protein FlgN                  |
| i02_1224       | c1340          | flgM        | anti-sigma28 factor FlgM                         |
| i02_1225       | c1341          | flgA        | flagellar basal body P-ring biosynthesis protein |
| i02_1226       | c1342          | flgB        | flagellar basal body rod protein FlgB            |
| i02_1227       | c1343          | flgC        | flagellar basal body rod protein FlgC            |
| i02_1228       | c1344          | flgD        | flagellar basal body rod modification protein    |
| i02_1229       | c1345          | flgE        | flagellar hook protein FlgE                      |
| i02_1230       | c1346          | flgF        | flagellar basal body rod protein FlgF            |
| i02_1231       | c1347          | flgG        | flagellar basal body rod protein FlgG            |
| i02_1232       | c1348          | flgH        | flagellar basal body L-ring protein              |
| i02_1233       | c1349          | flgI        | flagellar basal body P-ring protein              |
| i02_1234       | c1350          | flgJ        | flagellar rod assembly protein/muramidase FlgJ   |
| i02_1235       | c1351          | flgK        | flagellar hook-associated protein FlgK           |
| i02_1236       | c1352          | flgL        | flagellar hook-associated protein FlgL           |
| i02_1237       | c1353          | rne         | ribonuclease E                                   |
| i02_1238       | c1354          | /           | hypothetical protein                             |
| i02_1239       | c1355          | rluC        | 23S rRNA pseudouridylate synthase C              |
| i02_1240       | c1356          | maf         | Maf-like protein                                 |
| i02_1241       | c1357          | /           | hypothetical protein                             |
| i02_1242       | c1358          | yceD        | hypothetical protein                             |
| i02_1243       |                | /           | 50S ribosomal protein L32                        |
| i02_1244       | c1359          | plsX        | putative glycerol-3-phosphate acyltransferase    |
| i02_1245       | c1360          | fabH        | 3-oxoacyl-(acyl carrier protein) synthase III    |
| i02_1246       | c1361          | fabD        | acyl carrier protein S-malonyltransferase        |
| i02_1247       |                | /           | gluconate 5-dehydrogenase                        |

| Clone D  | CFT 073 | Gene | Product                                                      |
|----------|---------|------|--------------------------------------------------------------|
|          | c1363   | /    | hypothetical protein                                         |
| i02_1248 | c1364   | acpP | acyl carrier protein                                         |
| i02_1249 | c1365   | fabF | 3-oxoacyl-(acyl carrier protein) synthase II                 |
| i02_1250 | c1366   | pabC | 4-amino-4-deoxychorismate lyase                              |
| i02_1251 | c1369   | yceG | hypothetical protein                                         |
| i02_1252 | c1370   | tmk  | thymidylate kinase                                           |
| i02_1253 | c1371   | holB | DNA polymerase III subunit delta'                            |
| i02_1254 | c1372   | ycfH | putative metallodependent hydrolase                          |
| i02_1255 | c1373   | ptsG | glucose-specific PTS system IIBC components                  |
| i02_1256 | c1374   | fhuE | ferric-rhodotorulic acid outer membrane                      |
| i02_1257 | c1375   | /    | hypothetical protein                                         |
| i02_1258 | c1376   | ycfF | purine nucleoside phosphoramidase                            |
| i02_1259 | c1377   | ycfL | hypothetical protein                                         |
| i02_1260 | c1378   | ycfM | hypothetical protein                                         |
| i02_1261 | c1379   | thiK | thiamine kinase                                              |
| i02_1262 | c1380   | nagZ | beta-hexosaminidase                                          |
| i02_1263 | c1381   | ycfP | hypothetical protein                                         |
| i02_1264 | c1382   | ndh  | NADH dehydrogenase                                           |
| i02_1265 | c1383   | ycfJ | hypothetical protein                                         |
| -        | c1384   | /    | hypothetical protein                                         |
| i02_1266 | c1385   | ycfQ | putative transcriptional regulator YcfQ                      |
| i02_1267 | c1386   | ycfR | hypothetical protein                                         |
| i02_1268 | c1387   | ycfS | hypothetical protein                                         |
| i02_1269 | c1389   | mfd  | transcription-repair coupling factor                         |
| i02_1270 | c1390   | ycfT | hypothetical protein                                         |
| i02_1271 |         | ycfU | outer membrane-specific lipoprotein transporter subunit LoIC |
| i02_1272 | c1391   | loIC | outer membrane-specific lipoprotein transporter              |
| i02_1273 | c1392   | loID | lipoprotein transporter ATP-binding subunit                  |
| i02_1274 | c1393   | loIE | outer membrane-specific lipoprotein transporter              |
| i02_1275 | c1394   | ycfX | N-acetyl-D-glucosamine kinase                                |
| i02_1276 | c1395   | cobB | NAD-dependent deacetylase                                    |
| i02_1277 | c1396   | ycfZ | hypothetical protein                                         |
| i02_1278 | c1397   | ymfA | hypothetical protein                                         |
| i02_1279 | c1398   | potD | spermidine/putrescine ABC transporter                        |
| i02_1280 | c1399   | potC | spermidine/putrescine ABC transporter membrane               |
| i02_1281 | c1400   | /    | prophage lambda integrase                                    |
| i02_1282 | c1401   | xisN | putative excisionase for prophage                            |
| i02_1283 | c1402   | recE | exodeoxyribonuclease VIII                                    |
|          | c1403   | /    | hypothetical protein                                         |
| i02_1284 | c1404   | ydfD | hypothetical protein                                         |
| i02_1285 | c1405   | dicB | division inhibition protein dicB                             |
| i02_1286 | c1406   | /    | hypothetical protein                                         |
| i02_1287 |         | /    | hypothetical protein                                         |
| i02_1288 | c1407   | ydfC | hypothetical protein                                         |
| i02_1289 | c1408   | ydfB | hypothetical protein                                         |
| i02_1290 | c1409   | ydfA | hypothetical protein                                         |
| i02_1291 | c1410   | /    | hypothetical protein                                         |
| i02_1292 | c1411   | /    | hypothetical protein                                         |
| i02_1293 | c1412   | /    | hypothetical protein                                         |
| i02_1294 | c1413   | /    | hypothetical protein                                         |

| Clone D  | CFT 073 | Gene | Product                                          |
|----------|---------|------|--------------------------------------------------|
| i02_1295 | c1414   | /    | hypothetical protein                             |
|          | c1415   | /    | hypothetical protein                             |
| i02_1296 | c1416   | /    | hypothetical protein                             |
| i02_1297 | c1417   | /    | hypothetical protein                             |
| i02_1298 | c1418   | /    | hypothetical protein                             |
| i02_1299 | c1419   | /    | hypothetical protein                             |
|          | c1420   | /    | hypothetical protein                             |
| i02_1300 | c1421   | /    | hypothetical protein                             |
|          | c1422   | /    | hypothetical protein                             |
| i02_1302 | c1423   | /    | hypothetical protein                             |
| i02_1303 | c1425   | /    | hypothetical protein                             |
| i02_1304 | c1426   | /    | cryptic prophage antitermination protein Q       |
| -        | c1427   | /    | hypothetical protein                             |
| i02_1305 | c1428   | /    | hypothetical protein                             |
| i02_1306 | c1429   | ycgW | hypothetical protein                             |
| i02_1308 | c1431   | /    | hypothetical protein                             |
| i02_1307 | c1430   | /    | hypothetical protein                             |
| i02_1309 | c1432   | /    | hypothetical protein                             |
| i02_1310 | c1433   | /    | lambdoid prophage DLP12 lysis protein S          |
| i02_1311 | c1434   | ydfR | hypothetical protein                             |
| i02_1312 | c1435   | /    | hypothetical protein                             |
| i02_1313 | c1436   | /    | lysozyme from lambdoid prophage Qin              |
| i02_1314 | c1437   | /    | putative Rz endopeptidase from lambdoid prophage |
| i02_1315 | c1438   | /    | hypothetical protein                             |
| i02_1316 | c1439   | /    | hypothetical protein                             |
| i02_1317 | c1440   | ydfO | hypothetical protein                             |
|          | c1441   | /    | hypothetical protein                             |
| i02_1318 | c1442   | /    | hypothetical protein                             |
| i02_1319 | c1443   | /    | hypothetical protein                             |
| i02_1320 | c1444   | /    | prophage Qin DNA packaging protein NU1-like      |
| i02_1321 | c1445   | /    | putative DNA packaging protein of prophage       |
| i02_1322 | c1446   | /    | putative DNA packaging protein of prophage       |
| i02_1323 | c1447   | /    | putative capsid protein of prophage              |
| i02_1324 | c1448   | /    | putative capsid assembly protein of prophage     |
|          | c1449   | /    | hypothetical protein                             |
| i02_1325 | c1450   | /    | putative capsid protein of prophage              |
| i02_1326 | c1451   | /    | putative capsid protein of prophage              |
| i02_1327 | c1452   | /    | hypothetical protein                             |
| i02_1328 | c1453   | /    | putative head-tail joining protein of prophage   |
| i02_1329 | c1454   | /    | putative tail component of prophage              |
| i02_1330 | c1455   | /    | putative tail component of prophage              |
| i02_1331 | c1456   | /    | putative tail fiber component V of prophage      |
|          | c1457   | /    | hypothetical protein                             |
| i02_1332 | c1458   | /    | putative tail component of prophage              |
| i02_1333 | c1459   | /    | putative tail component of prophage              |
| i02_1334 | c1460   | /    | putative tail component of prophage              |
| i02_1335 | c1461   | /    | putative tail fiber component M of prophage      |
| i02_1336 | c1462   | /    | putative tail component of prophage              |
|          | c1463   | /    | hypothetical protein                             |
| i02_1337 | c1464   | /    | putative tail fiber component K of prophage      |
| i02_1338 | c1465   | /    | putative tail assembly protein                   |

| <b>Clone D</b> | <b>CFT 073</b> | <b>Gene</b> | <b>Product</b>                                 |
|----------------|----------------|-------------|------------------------------------------------|
| i02_1339       | c1466          | /           | putative tail component of prophage            |
| i02_1340       | c1467          | lomP        | putative Lom-like outer membrane protein       |
| i02_1341       | c1468          | /           | hypothetical protein                           |
|                | c1469          | /           | hypothetical protein                           |
| i02_1342       | c1470          | /           | hypothetical protein                           |
| i02_1343       | c1471          | /           | hypothetical protein                           |
|                | c1472          | /           | hypothetical protein                           |
|                | c1473          | /           | hypothetical protein                           |
| i02_1344       | c1474          | /           | hypothetical protein                           |
| i02_1345       | c1475          | ylcE        | hypothetical protein                           |
| i02_1346       | c1476          | potB        | spermidine/putrescine ABC transporter membrane |
| i02_1347       | c1477          | potA        | putrescine/spermidine ABC transporter ATPase   |
| i02_1349       | c1479          | pepT        | peptidase T                                    |
| i02_1348       | c1478          | /           | hypothetical protein                           |
| i02_1350       | c1480          | ycfD        | hypothetical protein                           |
| -              | c1481          | /           | hypothetical protein                           |
| -              | c1483          | /           | putative integrase of prophage                 |
| -              | c1485          | /           | hypothetical protein                           |
| -              | c1486          | /           | hypothetical protein                           |
| -              | c1487          | /           | hypothetical protein                           |
| -              | c1488          | /           | hypothetical protein                           |
| -              | c1489          | /           | hypothetical protein                           |
| -              | c1490          | /           | hypothetical protein                           |
| -              | c1491          | /           | hypothetical protein                           |
| -              | c1492          | /           | hypothetical protein                           |
| -              | c1493          | /           | hypothetical protein                           |
| -              | c1494          | /           | hypothetical protein                           |
| -              | c1495          | /           | hypothetical protein                           |
| -              | c1496          | /           | hypothetical protein                           |
| -              | c1497          | /           | putative single stranded DNA-binding protein   |
| -              | c1498          | /           | hypothetical protein                           |
| -              | c1499          | /           | putative capsid protein of prophage            |
| -              | c1500          | /           | hypothetical protein                           |
| -              | c1501          | /           | hypothetical protein                           |
| -              | c1502          | /           | hypothetical protein                           |
| -              | c1503          | /           | hypothetical protein                           |
| -              | c1504          | /           | hypothetical protein                           |
| -              | c1505          | /           | hypothetical protein                           |
| -              | c1506          | /           | hypothetical protein                           |
| -              | c1507          | /           | hypothetical protein                           |
| i02_1351       | c1508          | phoQ        | sensor protein PhoQ                            |
| i02_1352       | c1509          | phoP        | DNA-binding transcriptional regulator PhoP     |
| i02_1353       | c1510          | purB        | adenylosuccinate lyase                         |
| i02_1354       | c1511          | ycfC        | hypothetical protein                           |
| i02_1355       | c1512          | mnmA        | tRNA-specific 2-thiouridylase MnmA             |
| i02_1356       | c1513          | /           | putative Nudix hydrolase ymfB                  |
| i02_1358       | c1515          | /           | hypothetical protein                           |
| i02_1357       | c1514          | /           | hypothetical protein                           |
|                | c1516          | /           | hypothetical protein                           |
| i02_1359       | c1517          | icdA        | isocitrate dehydrogenase                       |
|                | c1518          | /           | hypothetical protein                           |

| Clone D  | CFT 073 | Gene | Product                                          |
|----------|---------|------|--------------------------------------------------|
| i02_1360 | c1519   | /    | prophage lambda integrase                        |
| -        | c1520   | /    | hypothetical protein                             |
| -        | c1521   | /    | transposase IS629                                |
| i02_1361 | c1522   | /    | hypothetical protein                             |
| i02_1362 | c1523   | /    | hypothetical protein                             |
| i02_1363 | c1524   | /    | hypothetical protein                             |
| i02_1364 | c1525   | /    | hypothetical protein                             |
| i02_1365 | c1526   | /    | hypothetical protein                             |
| i02_1366 | c1527   | /    | hypothetical protein                             |
| -        | c1529   | /    | hypothetical protein                             |
| -        | c1528   | /    | hypothetical protein                             |
| -        | c1530   | /    | hypothetical protein                             |
| -        | c1529   | /    | hypothetical protein                             |
| -        | c1530   | /    | hypothetical protein                             |
| i02_1367 | c1531   | /    | hypothetical protein                             |
| i02_1369 | c1532   | /    | hypothetical protein                             |
| i02_1370 |         | /    | hypothetical protein                             |
| i02_1371 | c1533   | /    | hypothetical protein                             |
|          | c1535   | /    | hypothetical protein                             |
| i02_1372 | c1534   | /    | putative exonuclease encoded by prophage         |
| i02_1373 | c1536   | /    | putative recombination protein Bet of prophage   |
| i02_1374 | c1537   | gamW | putative host-nuclease inhibitor protein Gam     |
|          | c1539   | /    | hypothetical protein                             |
| i02_1375 | c1538   | /    | hypothetical protein                             |
| i02_1376 | c1540   | /    | lambda regulatory protein CIII                   |
| i02_1377 | c1541   | /    | putative single-stranded DNA binding protein     |
| i02_1378 | c1542   | /    | lambda ant-restriction protein                   |
| i02_1379 | c1543   | /    | putative superinfection exclusion protein B      |
| i02_1380 |         | /    | N protein                                        |
| i02_1381 | c1544   | /    | hypothetical protein                             |
| i02_1382 | c1545   | /    | hypothetical protein                             |
| i02_1383 | c1546   | /    | repressor protein                                |
| i02_1384 | c1547   | /    | hypothetical protein                             |
| i02_1385 | c1548   | /    | putative regulatory protein CII                  |
| i02_1386 | c1549   | /    | putative replication protein O of bacteriophage  |
| i02_1387 | c1550   | /    | putative replication protein P of bacteriophage  |
| i02_1388 | c1551   | /    | putative exclusion protein ren of prophage       |
| -        | c1552   | /    | hypothetical protein                             |
| -        | c1553   | /    | transposase IS629                                |
| i02_1389 | c1554   | /    | hypothetical protein                             |
| i02_1390 | c1555   | /    | putative DNA N-6-adenine-methyltransferase       |
| i02_1391 | c1556   | /    | hypothetical protein                             |
| i02_1392 | c1557   | rus  | endodeoxyribonuclease RUS                        |
| i02_1393 | c1558   | /    | hypothetical protein                             |
| i02_1394 | c1559   | ybcQ | lambdoid prophage DLP12 antitermination protein  |
| i02_1395 | c1560   | nmpC | Outer membrane porin protein nmpC precursor      |
| i02_1396 | c1561   | /    | lambdoid prophage DLP12 lysis protein S          |
| i02_1397 | c1562   | ybcS | lysozyme from lambdoid prophage DLP12            |
| i02_1398 | c1563   | /    | putative Rz endopeptidase from lambdoid prophage |
| i02_1399 | c1564   | ybcU | Bor protein homolog from lambdoid prophage DLP12 |

| <b>Clone D</b> | <b>CFT 073</b> | <b>Gene</b> | <b>Product</b>                                      |
|----------------|----------------|-------------|-----------------------------------------------------|
| i02_1400       | c1565          | /           | partial tonB-like membrane protein encoded          |
|                | c1566          | /           | hypothetical protein                                |
|                | c1567          | /           | hypothetical protein                                |
| i02_1401       |                | /           | hypothetical protein                                |
| i02_1403       |                | /           | hypothetical protein                                |
| i02_1404       |                | nohA2       | prophage Qin DNA packaging protein NU1-like protein |
| i02_1405       | c1568          | nohA        | prophage Qin DNA packaging protein NU1-like protein |
| i02_1406       | c1569          | /           | putative DNA packaging protein of prophage          |
| i02_1407       | c1570          | /           | putative DNA packaging protein of prophage          |
| i02_1408       | c1571          | /           | putative capsid protein of prophage                 |
|                | c1572          | /           | putative capsid assembly protein of prophage        |
|                | c1573          | /           | hypothetical protein                                |
| i02_1409       | c1574          | /           | putative capsid protein of prophage                 |
| i02_1410       | c1575          | /           | putative capsid protein of prophage                 |
| i02_1411       | c1576          | /           | hypothetical protein                                |
| i02_1412       | c1577          | /           | putative head-tail joining protein of prophage      |
| i02_1413       | c1578          | /           | putative tail fiber component Z of prophage         |
| i02_1414       | c1579          | /           | putative tail component of prophage                 |
| i02_1415       | c1580          | /           | tail protein                                        |
|                | c1581          | /           | hypothetical protein                                |
| i02_1416       | c1583          | /           | putative tail component of prophage                 |
| i02_1417       | c1584          | /           | putative tail component of prophage                 |
| i02_1418       | c1585          | /           | putative tail component of prophage                 |
| i02_1419       |                | /           | putative tail component of prophage                 |
|                | c1586          | /           | hypothetical protein                                |
| i02_1420       | c1587          | /           | putative tail component of prophage                 |
| i02_1421       | c1588          | /           | putative tail component of prophage                 |
| i02_1422       | c1589          | /           | putative tail component of prophage                 |
| i02_1423       | c1590          | /           | putative tail component of prophage                 |
| i02_1424       | c1591          | /           | hypothetical protein                                |
|                | c1592          | /           | hypothetical protein                                |
| i02_1424       | c1593          | /           | hypothetical protein                                |
|                | c1592          | /           | hypothetical protein                                |
| i02_1425       | c1594          | /           | hypothetical protein                                |
| i02_1426       | c1595          | /           | hypothetical protein                                |
|                | c1596          | /           | hypothetical protein                                |
| i02_1427       | c1597          | sitD        | SitD protein                                        |
| i02_1428       | c1598          | sitC        | SitC protein                                        |
| i02_1429       | c1599          | sitB        | SitB protein                                        |
| i02_1430       | c1600          | sitA        | SitA protein                                        |
| i02_1431       | c1601          | /           | hypothetical protein                                |
|                | c1602          | /           | hypothetical protein                                |
| i02_1432       | c1603          | ycgX        | hypothetical protein                                |
| i02_1433       | c1604          | ycgE        | putative transcriptional regulator YcgE             |
| i02_1434       | c1605          | /           | hypothetical protein                                |
| i02_1435       | c1606          | ycgF        | hypothetical protein                                |
| i02_1436       | c1607          | ycgZ        | hypothetical protein                                |
|                | c1608          | /           | hypothetical protein                                |
| i02_1437       |                | /           | hypothetical protein                                |
| i02_1438       | c1609          | ymgB        | hypothetical protein                                |



| <b>Clone D</b> | <b>CFT 073</b> | <b>Gene</b> | <b>Product</b>                                 |
|----------------|----------------|-------------|------------------------------------------------|
| i02_1439       |                | /           | hypothetical protein                           |
| i02_1440       | c1610          | /           | hypothetical protein                           |
| i02_1441       | c1611          | /           | hypothetical protein                           |
| i02_1442       |                | /           | hypothetical protein                           |
| i02_1443       |                | /           | conserved hypothetical protein                 |
| i02_1444       |                | /           | hypothetical protein                           |
| i02_1445       |                | /           | hypothetical protein                           |
| i02_1446       | c1615          | /           | hypothetical protein                           |
| i02_1447       | c1616          | ymgD        | hypothetical protein                           |
| i02_1448       | c1617          | /           | hypothetical protein                           |
| i02_1449       | c1618          | /           | hypothetical protein                           |
| i02_1450       | c1619          | /           | hypothetical protein                           |
| i02_1451       | c1620          | /           | hypothetical protein                           |
| i02_1452       | c1621          | minE        | cell division topological specificity factor   |
| i02_1453       | c1622          | minD        | cell division inhibitor MinD                   |
| i02_1454       | c1623          | minC        | septum formation inhibitor                     |
| i02_1455       | c1624          | /           | hypothetical protein                           |
| i02_1456       | c1625          | ycgJ        | hypothetical protein                           |
| i02_1457       | c1626          | ycgK        | hypothetical protein                           |
| i02_1458       | c1627          | ycgL        | hypothetical protein                           |
| i02_1459       | c1628          | /           | hypothetical protein                           |
| i02_1460       | c1629          | ycgN        | hypothetical protein                           |
| i02_1461       | c1630          | /           | hypothetical protein                           |
| i02_1462       | c1631          | umuD        | DNA polymerase V subunit UmuD                  |
| i02_1463       | c1632          | umuC        | DNA polymerase V subunit UmuC                  |
| i02_1464       | c1633          | dsbB        | disulfide bond formation protein B             |
| i02_1465       | c1634          | nhaB        | sodium/proton antiporter                       |
| i02_1466       | c1635          | fadR        | fatty acid metabolism regulator                |
| i02_1467       | c1636          | /           | hypothetical protein                           |
| i02_1468       | c1637          | ycgB        | SpoVR family protein                           |
| i02_1469       | c1638          | dadA        | D-amino acid dehydrogenase small subunit       |
| i02_1470       | c1639          | dadX        | alanine racemase                               |
| i02_1471       | c1640          | ycgO        | potassium/proton antiporter                    |
| i02_1473       | c1643          | mltE        | membrane-bound lytic murein transglycosylase E |
| i02_1472       | c1641          | ldcA        | L,D-carboxypeptidase A                         |
| i02_1474       | c1644          | ycgR        | hypothetical protein                           |
| i02_1475       | c1645          | ymgE        | transglycosylase associated protein            |
| i02_1476       | c1646          | prpA        | outer membrane receptor                        |
| i02_1477       | c1647          | modD        | molybdenum transport protein ModD              |
|                | c1649          | /           | hypothetical protein                           |
| i02_1478       | c1648          | /           | hypothetical protein                           |
| i02_1479       | c1650          | /           | putative iron compound ABC transporter         |
| i02_1480       | c1651          | fecD        | Iron(III) dicitrate transport system permease  |
| i02_1481       | c1652          | /           | hypothetical protein                           |
| i02_1482       | c1653          | /           | hypothetical protein                           |
| i02_1484       | c1655          | /           | hypothetical protein                           |
| i02_1483       | c1654          | treA        | trehalase                                      |
| i02_1485       |                | /           | hypothetical protein                           |
| i02_1486       | c1656          | ycgC        | dihydroxyacetone kinase subunit M              |
| i02_1487       | c1657          | /           | dihydroxyacetone kinase ADP-binding subunit    |
| i02_1488       | c1658          | ycgT        | dihydroxyacetone kinase subunit DhaK           |
| i02_1489       | c1659          | /           | DNA-binding transcriptional regulator DhaR     |

| <b>Clone D</b> | <b>CFT 073</b> | <b>Gene</b> | <b>Product</b>                                      |
|----------------|----------------|-------------|-----------------------------------------------------|
| i02_1490       | c1660          | /           | hypothetical protein                                |
| i02_1491       | c1661          | ychF        | GTP-dependent nucleic acid-binding protein EngD     |
| i02_1492       | c1662          | pth         | peptidyl-tRNA hydrolase                             |
| i02_1493       | c1663          | ychH        | hypothetical protein                                |
| i02_1494       | c1664          | ychM        | putative sulfate transporter YchM                   |
| i02_1495       | c1665          | prsA        | ribose-phosphate pyrophosphokinase                  |
| i02_1496       | c1666          | ipk         | 4-diphosphocytidyl-2-C-methylerythritol kinase      |
| i02_1497       | c1667          | lolB        | outer membrane lipoprotein LolB                     |
| i02_1498       | c1668          | hemA        | glutamyl-tRNA reductase                             |
| i02_1499       | c1669          | prfA        | peptide chain release factor 1                      |
| i02_1500       | c1670          | hemK        | N5-glutamine S-adenosyl-L-methionine-dependent      |
| i02_1501       | c1671          | /           | putative transcriptional regulator                  |
| i02_1502       | c1672          | ychA        | putative transcriptional regulator                  |
|                | c1673          | /           | hypothetical protein                                |
| i02_1503       | c1674          | kdsA        | 2-dehydro-3-deoxyphosphooctonate aldolase           |
| i02_1504       | c1675          | /           | hypothetical protein                                |
| i02_1505       |                | /           | hypothetical protein                                |
| i02_1506       | c1676          | chaA        | calcium/sodium:proton antiporter                    |
| i02_1507       | c1677          | chaB        | cation transport regulator                          |
| i02_1508       | c1678          | chaC        | cation transport protein chaC                       |
| i02_1509       | c1679          | ychN        | hypothetical protein                                |
| i02_1510       | c1680          | ychP        | hypothetical protein                                |
| i02_1511       | c1681          | narL        | transcriptional regulator NarL                      |
| i02_1512       | c1682          | narX        | nitrate/nitrite sensor protein NarX                 |
| i02_1513       | c1683          | /           | hypothetical protein                                |
| i02_1514       | c1684          | narK        | nitrite extrusion protein 1                         |
| i02_1515       | c1685          | narG        | respiratory nitrate reductase 1 alpha chain         |
| i02_1516       | c1686          | narH        | respiratory nitrate reductase 1 beta chain          |
| i02_1517       | c1687          | narJ        | respiratory nitrate reductase 1 delta chain         |
| i02_1518       | c1688          | narI        | respiratory nitrate reductase 1 gamma chain         |
| i02_1519       | c1689          | /           | hypothetical protein                                |
| i02_1520       | c1690          | /           | hypothetical protein                                |
| i02_1521       | c1691          | /           | putative gumP-like protein                          |
| i02_1522       | c1692          | /           | hypothetical protein                                |
| i02_1523       | c1693          | /           | hypothetical protein                                |
| i02_1524       | c1694          | /           | hypothetical protein                                |
| i02_1525       | c1695          | /           | hypothetical protein                                |
| i02_1527       | c1696          | purU        | formyltetrahydrofolate deformylase                  |
| i02_1528       | c1697          | ychJ        | hypothetical protein                                |
| i02_1529       | c1698          | ychK        | hypothetical protein                                |
| i02_1530       | c1699          | hnr         | response regulator of RpoS                          |
| i02_1531       | c1700          | galU        | UTP--glucose-1-phosphate uridylyltransferase        |
| i02_1532       | c1701          | hns         | global DNA-binding transcriptional factor           |
| i02_1533       | c1702          | /           | hypothetical protein                                |
| i02_1534       | c1703          | tdk         | thymidine kinase                                    |
| i02_1535       | c1704          | /           | transposase insG                                    |
| i02_1537       | c1705          | adhE        | bifunctional acetaldehyde-CoA/alcohol dehydrogenase |
| i02_1538       | c1706          | ychE        | hypothetical protein                                |
| i02_1539       |                | /           | hypothetical protein                                |

| <b>Clone D</b> | <b>CFT 073</b> | <b>Gene</b> | <b>Product</b>                                                                         |
|----------------|----------------|-------------|----------------------------------------------------------------------------------------|
| i02_1540       | c1707          | oppA        | periplasmic oligopeptide-binding protein                                               |
| i02_1541       | c1708          | oppB        | oligopeptide transporter permease                                                      |
| i02_1542       | c1709          | oppC        | oligopeptide transport system permease protein                                         |
| i02_1543       | c1710          | oppD        | oligopeptide transporter ATP-binding component                                         |
| i02_1544       | c1711          | oppF        | oligopeptide transport ATP-binding protein oppF                                        |
| i02_1545       | c1712          | yciU        | dsDNA-mimic protein                                                                    |
| i02_1546       | c1713          | cls         | cardiolipin synthetase                                                                 |
| i02_1547       | c1714          | /           | hypothetical protein                                                                   |
| i02_1548       | c1715          | kch         | voltage-gated potassium channel                                                        |
| i02_1549       | c1716          | yciI        | YciI-like protein                                                                      |
| i02_1550       | c1717          | tonB        | transport protein TonB                                                                 |
|                | c1718          | /           | hypothetical protein                                                                   |
| i02_1551       | c1719          | yciA        | acyl-CoA thioester hydrolase                                                           |
| i02_1552       | c1720          | ispZ        | intracellular septation protein A                                                      |
| i02_1553       | c1721          | yciC        | hypothetical protein                                                                   |
| i02_1554       | c1722          | ompW        | outer membrane protein W                                                               |
| i02_1555       | c1723          | yciE        | hypothetical protein                                                                   |
| i02_1556       | c1724          | yciF        | hypothetical protein                                                                   |
| i02_1557       | c1725          | trpA        | tryptophan synthase subunit alpha                                                      |
| i02_1558       | c1726          | trpB        | tryptophan synthase subunit beta                                                       |
| i02_1559       |                | trpC        | bifunctional indole-3-glycerol phosphate synthase/phosphoribosylanthranilate isomerase |
| i02_1560       | c1729          | trpD        | bifunctional glutamine                                                                 |
| i02_1561       | c1730          | trpE        | anthranilate synthase component                                                        |
|                | c5494          | trpL        | Trp operon leader peptide                                                              |
| i02_1562       | c1731          | trpH        | protein trpH                                                                           |
| i02_1563       | c1732          | yciO        | hypothetical protein                                                                   |
| i02_1564       | c1733          | yciQ        | hypothetical protein                                                                   |
| i02_1565       | c1734          | yciL        | 23S rRNA pseudouridylate synthase B                                                    |
| i02_1566       | c1735          | btuR        | cobinamide adenosyltransferase / cobalamin adenosyltransferase                         |
| i02_1567       | c1736          | yciK        | short chain dehydrogenase                                                              |
| i02_1568       | c1737          | sohB        | putative periplasmic protease                                                          |
| -              | c1738          | /           | hypothetical protein                                                                   |
| i02_1570       | c1740          | /           | hypothetical protein                                                                   |
| i02_1569       | c1739          | yciN        | hypothetical protein                                                                   |
| i02_1571       | c1741          | topA        | DNA topoisomerase I                                                                    |
| i02_1572       | c1742          | cysB        | transcriptional regulator CysB                                                         |
| i02_1573       | c1743          | /           | hypothetical protein                                                                   |
| i02_1574       | c1744          | /           | hypothetical protein                                                                   |
| i02_1575       | c1745          | acnA        | aconitate hydratase                                                                    |
| i02_1576       | c1746          | ribA        | GTP cyclohydrolase II                                                                  |
| i02_1577       | c1747          | pgpB        | phosphatidylglycerophosphatase B                                                       |
| i02_1578       | c1748          | yciS        | hypothetical protein                                                                   |
| i02_1579       | c1749          | yciM        | tetratricopeptide repeat protein                                                       |
| i02_1580       | c1750          | pyrF        | orotidine 5'-phosphate decarboxylase                                                   |
| i02_1581       | c1751          | yciH        | translation initiation factor Sui1                                                     |
| i02_1582       | c1752          | /           | hypothetical protein                                                                   |
| i02_1583       | c1753          | osmB        | lipoprotein                                                                            |
| i02_1584       | c1754          | yciT        | putative transcriptional regulator YciT                                                |
| i02_1585       | c1755          | /           | hypothetical protein                                                                   |
| i02_1586       | c1756          | yciR        | RNase II stability modulator                                                           |

| <b>Clone D</b> | <b>CFT 073</b> | <b>Gene</b> | <b>Product</b>                                       |
|----------------|----------------|-------------|------------------------------------------------------|
| i02_1587       | c1757          | rnb         | exoribonuclease II                                   |
| i02_1588       | c1758          | yciW        | hypothetical protein                                 |
| i02_1589       | c1759          | fabI        | enoyl-(acyl carrier protein) reductase               |
| i02_1590       | c1760          | /           | putative transcriptional repressor                   |
| i02_1591       | c1761          | /           | acriflavin resistance protein A                      |
|                | c1762          | /           | hypothetical protein                                 |
|                | c1763          | /           | hypothetical protein                                 |
| i02_1593       | c1764          | /           | acriflavin resistance protein B                      |
| i02_1594       | c1765          | /           | partial putative outer membrane channel protein      |
| i02_1595       | c1766          | /           | membrane transporter                                 |
| i02_1596       | c1767          | sapF        | peptide transport system ATP-binding protein         |
| i02_1597       | c1768          | sapD        | peptide transport system ATP-binding protein         |
| i02_1598       | c1769          | sapC        | peptide transport system permease protein sapC       |
| i02_1599       | c1770          | sapB        | peptide transport system permease protein sapB       |
| i02_1600       | c1771          | sapA        | peptide transport periplasmic protein sapA           |
| i02_1601       | c1772          | ymjA        | hypothetical protein                                 |
| i02_1602       | c1773          | pspF        | phage shock protein                                  |
| i02_1603       | c1774          | pspA        | phage shock protein PspA                             |
| i02_1604       | c1775          | pspB        | phage shock protein B                                |
|                | c1776          | /           | hypothetical protein                                 |
| i02_1605       | c1777          | pspC        | DNA-binding transcriptional activator PspC           |
| i02_1606       | c1778          | pspD        | peripheral inner membrane phage-shock protein        |
| i02_1607       | c1779          | pspE        | thiosulfate:cyanide sulfurtransferase                |
| i02_1608       | c1780          | ycjM        | putative sucrose phosphorylase                       |
|                | c1781          | /           | hypothetical protein                                 |
| i02_1609       | c1782          | ycjN        | ABC transporter periplasmic-binding protein          |
| i02_1610       | c1783          | ycjO        | ABC transporter permease                             |
| i02_1611       | c1784          | ycjP        | ABC transporter permease                             |
| i02_1612       | c1785          | ycjQ        | hypothetical protein                                 |
| i02_1613       | c1786          | ycjR        | hypothetical protein                                 |
| i02_1614       | c1787          | ycjS        | oxidoreductase ycjS                                  |
| i02_1615       | c1788          | ycjT        | putative transport protein YcjT                      |
| i02_1616       | c1789          | ycjU        | putative beta-phosphoglucomutase                     |
| i02_1617       | c1790          | ycjV        | ABC transporter ATP-binding protein                  |
| i02_1618       | c1791          | ompG        | Outer membrane protein G precursor                   |
| i02_1619       | c1792          | ycjW        | putative transcriptional regulator YcjW              |
| i02_1620       | c1793          | ycjX        | hypothetical protein                                 |
| i02_1621       | c1794          | ycjF        | hypothetical protein                                 |
| i02_1622       | c1795          | tyrR        | DNA-binding transcriptional regulator TyrR           |
| i02_1623       | c1796          | tpx         | thiol peroxidase                                     |
| i02_1624       | c1797          | ycjG        | hypothetical protein                                 |
| i02_1625       |                | ycjI        | murein peptide amidase A                             |
| i02_1626       | c1800          | /           | hypothetical protein                                 |
| i02_1627       | c1801          | /           | hypothetical protein                                 |
| i02_1628       | c1802          | /           | putative transcriptional regulator YcjZ              |
| i02_1629       | c1803          | mppA        | periplasmic murein peptide-binding protein           |
| i02_1630       | c1804          | ynal        | hypothetical protein                                 |
| i02_1631       | c1805          | ynaJ        | hypothetical protein                                 |
| i02_1632       | c1806          | ydaA        | universal stress protein UspE                        |
| i02_1633       | c1807          | fnr         | fumarate/nitrate reduction transcriptional regulator |
| i02_1634       | c1808          | ogt         | O-6-alkylguanine-DNA:cysteine-protein                |
| i02_1635       | c1809          | /           | hypothetical protein                                 |

| <b>Clone D</b> | <b>CFT 073</b> | <b>Gene</b> | <b>Product</b>                             |
|----------------|----------------|-------------|--------------------------------------------|
| i02_1636       | c1810          | /           | hypothetical protein                       |
| i02_1637       | c1811          | /           | hypothetical protein                       |
| i02_1638       | c1812          | /           | hypothetical protein                       |
|                | c1813          | /           | hypothetical protein                       |
| i02_1639       | c1814          | ydaL        | hypothetical protein                       |
| i02_1640       | c1815          | ydaM        | hypothetical protein                       |
| i02_1641       | c1816          | zntB        | zinc transporter                           |
| i02_1642       | c1817          | dbpA        | ATP-dependent RNA helicase DbpA            |
| i02_1643       | c1818          | ydaO        | C32 tRNA thiolase                          |
| i02_1644       | c1819          | /           | hypothetical protein                       |
| i02_1645       | c1820          | /           | hypothetical protein                       |
| i02_1646       | c1821          | ynaF        | hypothetical protein                       |
| i02_1647       | c1822          | ompN        | Outer membrane protein N precursor         |
| i02_1648       | c1823          | ydbK        | pyruvate-flavodoxin oxidoreductase         |
| i02_1650       | c1825          | /           | hypothetical protein                       |
| i02_1649       | c1824          | /           | hypothetical protein                       |
| i02_1651       | c1826          | hslJ        | heat-inducible protein                     |
| i02_1652       | c1827          | ldhA        | D-lactate dehydrogenase                    |
| i02_1653       | c1828          | ydbH        | hypothetical protein                       |
| i02_1654       | c1829          | ynbE        | hypothetical protein                       |
| i02_1655       | c1830          | ydbL        | hypothetical protein                       |
| i02_1656       |                | /           | possible autotransporter/adhesin           |
| i02_1657       | c1832          | ydbC        | putative oxidoreductase                    |
| i02_1658       | c1833          | /           | hypothetical protein                       |
| i02_1659       | c1834          | ynbA        | hypothetical protein                       |
| i02_1660       | c1835          | ynbB        | hypothetical protein                       |
| i02_1661       | c1836          | ynbC        | hypothetical protein                       |
| i02_1662       | c1837          | ynbD        | hypothetical protein                       |
|                | c1838          | /           | hypothetical protein                       |
| i02_1663       | c1839          | acpD        | azoreductase                               |
| i02_1664       | c1840          | hrpA        | ATP-dependent RNA helicase HrpA            |
| i02_1665       | c1841          | ydcF        | hypothetical protein                       |
| i02_1666       | c1842          | aldA        | aldehyde dehydrogenase A                   |
| i02_1667       | c1843          | /           | glyceraldehyde 3-phosphate dehydrogenase A |
| i02_1668       | c1844          | cybB        | cytochrome b561                            |
| i02_1669       | c1845          | ydcA        | hypothetical protein                       |
| i02_1670       | c1846          | /           | hypothetical protein                       |
| i02_1671       | c1847          | ycdI        | putative transcriptional regulator Ydcl    |
| i02_1672       | c1848          | ydcJ        | hypothetical protein                       |
| i02_1673       | c1849          | mdoD        | glucan biosynthesis protein D              |
| i02_1674       | c1850          | ydcH        | hypothetical protein                       |
| i02_1675       | c1851          | rimL        | ribosomal-protein-L7/L12-serine            |
| i02_1676       | c1852          | ydcK        | hypothetical protein                       |
| i02_1677       | c1853          | tehA        | potassium-tellurite ethidium and proflavin |
| i02_1678       | c1854          | tehB        | tellurite resistance protein TehB          |
| i02_1679       |                | /           | hypothetical protein                       |
|                | c1855          | /           | hypothetical protein                       |
| i02_1680       | c1856          | ydcL        | lipoprotein ydcL precursor                 |
| i02_1682       | c1858          | ydcN        | hypothetical protein                       |
| i02_1681       | c1857          | ydcO        | hypothetical protein                       |
| i02_1683       | c1859          | ydcP        | putative protease ydcP precursor           |
| i02_1684       | c1860          | yncJ        | hypothetical protein                       |

| <b>Clone D</b> | <b>CFT 073</b> | <b>Gene</b> | <b>Product</b>                              |
|----------------|----------------|-------------|---------------------------------------------|
| i02_1685       | c1861          | /           | hypothetical protein                        |
| i02_1686       | c1862          | /           | hypothetical protein                        |
| i02_1687       | c1863          | ydcR        | hypothetical protein                        |
| i02_1688       | c1864          | ydcS        | ABC transporter periplasmic-binding protein |
| i02_1689       | c1865          | ydcT        | ABC transporter ATP-binding protein         |
| i02_1690       | c1866          | ydcU        | ABC transporter permease                    |
| i02_1691       | c1867          | ydcV        | ABC transporter permease                    |
| i02_1692       | c1869          | ydcW        | gamma-aminobutyraldehyde dehydrogenase      |
| i02_1693       |                | /           | hypothetical protein                        |
| i02_1695       | c1870          | /           | hypothetical protein                        |
| i02_1694       |                | /           | hypothetical protein                        |
| i02_1696       | c1871          | ydc         | hypothetical protein                        |
| i02_1697       | c1872          | ydcZ        | hypothetical protein                        |
| i02_1699       |                | /           | hypothetical protein                        |
| i02_1698       | c1873          | yncA        | acetyltransferase yncA                      |
| i02_1700       | c1874          | /           | hypothetical protein                        |
| i02_1701       |                | yncD        | iron outer membrane transporter             |
| i02_1702       | c1877          | yncE        | hypothetical protein                        |
| i02_1703       | c1878          | ansP        | L-asparagine permease                       |
| i02_1704       | c1879          | /           | hypothetical protein                        |
| i02_1705       | c1880          | /           | hypothetical protein                        |
| i02_1707       | c1882          | /           | hypothetical protein                        |
| i02_1706       | c1881          | /           | hypothetical protein                        |
| i02_1708       | c1883          | /           | hypothetical protein                        |
| i02_1709       | c1884          | /           | hypothetical protein                        |
| i02_1710       | c1885          | /           | hypothetical protein                        |
| i02_1711       | c1886          | /           | hypothetical protein                        |
| i02_1712       | c1887          | /           | hypothetical protein                        |
| i02_1713       | c1888          | /           | hypothetical protein                        |
| i02_1714       | c1889          | /           | hypothetical protein                        |
| i02_1715       | c1890          | /           | hypothetical protein                        |
| i02_1717       | c1891          | /           | hypothetical protein                        |
| i02_1717       | c1892          | /           | hypothetical protein                        |
| i02_1718       | c1893          | /           | hypothetical protein                        |
| i02_1719       |                | /           | hypothetical protein                        |
| i02_1720       | c1894          | yddH        | hypothetical protein                        |
| i02_1721       | c1895          | nhoA        | N-hydroxyarylamine O-acetyltransferase      |
| i02_1722       | c1896          | yddE        | hypothetical protein                        |
| i02_1723       | c1897          | narV        | respiratory nitrate reductase 2 gamma chain |
| i02_1724       | c1898          | narW        | respiratory nitrate reductase 2 delta chain |
| i02_1725       | c1899          | narY        | respiratory nitrate reductase 2 beta chain  |
| i02_1726       | c1900          | narZ        | respiratory nitrate reductase 2 alpha chain |
| i02_1727       | c1901          | narU        | nitrite extrusion protein 2                 |
| i02_1728       | c1902          | yddG        | hypothetical protein                        |
| i02_1729       | c5623          | fdnG        | formate dehydrogenase                       |
|                | c1905          | /           | hypothetical protein                        |
| i02_1730       | c1906          | fdnH        | formate dehydrogenase-N beta subunit        |
| i02_1731       | c1907          | fdnI        | formate dehydrogenase-N subunit gamma       |
|                | c1908          | /           | hypothetical protein                        |
| i02_1732       | c1909          | yddM        | hypothetical protein                        |
| i02_1733       | c1910          | /           | hypothetical protein                        |
| i02_1734       | c1911          | adhP        | alcohol dehydrogenase                       |

| <b>Clone D</b> | <b>CFT 073</b> | <b>Gene</b> | <b>Product</b>                                |
|----------------|----------------|-------------|-----------------------------------------------|
| i02_1735       | c1912          | sfcA        | malate dehydrogenase                          |
| i02_1736       | c1913          | rpsV        | 30S ribosomal subunit S22                     |
| i02_1737       | c1914          | /           | biofilm-dependent modulation protein          |
| i02_1738       | c1915          | /           | hypothetical protein                          |
| i02_1739       | c1916          | osmC        | osmotically inducible protein C               |
| i02_1740       | c1918          | /           | putative sensor kinase                        |
| i02_1741       | c1919          | /           | hypothetical protein                          |
| i02_1742       | c1920          | yddW        | lipoprotein yddW precursor                    |
| i02_1743       | c1921          | xasA        | amino acid antiporter                         |
| i02_1744       | c1922          | gadB        | glutamate decarboxylase beta                  |
| i02_1745       | c1923          | pqqL        | zinc protease pqqL                            |
| i02_1746       | c1924          | yddB        | hypothetical protein                          |
| i02_1747       | c1925          | yddA        | ABC transporter ATP-binding protein           |
| i02_1748       | c1926          | ydeM        | hypothetical protein                          |
| i02_1749       | c1927          | ydeN        | putative sulfatase ydeN precursor             |
| i02_1750       | c1928          | ydeO        | transcriptional regulator YdeO                |
| i02_1751       | c1929          | /           | hypothetical protein                          |
| i02_1752       | c1930          | ydeP        | putative oxidoreductase                       |
| i02_1753       | c1931          | ydeQ        | fimbrial-like protein ydeQ precursor          |
| i02_1754       | c1932          | ydeR        | fimbrial-like protein ydeR precursor          |
| i02_1755       | c1933          | ydeS        | fimbrial-like protein ydeS precursor          |
| i02_1756       | c1934          | /           | Outer membrane usher protein fimD precursor   |
| i02_1757       | c1935          | /           | chaperone protein fimC precursor              |
| i02_1758       | c1936          | /           | Type-1 fimbrial protein, A chain precursor    |
| i02_1759       | c1937          | /           | hypothetical protein                          |
| -              | c1938          | oprR        | putative transcriptional regulator YcjZ       |
| i02_1760       | c1939          | /           | hypothetical protein                          |
| i02_1761       | c1940          | hipA        | protein hipA                                  |
| i02_1762       | c1941          | hipB        | DNA-binding transcriptional regulator HipB    |
| i02_1763       | c1942          | tam         | trans-aconitate 2-methyltransferase           |
| i02_1764       | c1943          | yneE        | hypothetical protein                          |
| i02_1765       |                | uxaB        | altronate oxidoreductase                      |
| i02_1766       | c1945          | yneF        | hypothetical protein                          |
| i02_1767       | c1946          | yneG        | hypothetical protein                          |
| i02_1768       | c1947          | yneH        | glutaminase                                   |
| i02_1769       | c1948          | ynel        | putative succinate semialdehyde dehydrogenase |
| i02_1770       | c1949          | yneJ        | putative transcriptional regulator YneJ       |
| i02_1771       |                | /           | hypothetical protein                          |
| i02_1772       | c1950          | sotB        | sugar efflux transporter                      |
| i02_1773       | c1951          | marC        | multiple drug resistance protein MarC         |
| i02_1774       | c1952          | marR        | DNA-binding transcriptional repressor MarR    |
| i02_1775       | c1953          | marA        | DNA-binding transcriptional activator MarA    |
| i02_1776       | c1954          | marB        | hypothetical protein                          |
| i02_1777       | c1955          | celA        | 6-phospho-beta-glucosidase                    |
| i02_1778       | c1956          | /           | hypothetical protein                          |
| i02_1779       | c1957          | /           | PTS system, cellobiose-specific IIA component |
| i02_1780       | c1958          | /           | hypothetical protein                          |
| i02_1781       | c1959          | /           | PTS system, cellobiose-specific IIB component |
| i02_1782       | c1960          | /           | hypothetical protein                          |
| i02_1783       | c1961          | ydeD        | O-acetylserine/cysteine export protein        |
| i02_1784       | c1962          | ydeF        | putative MFS-type transporter YdeE            |
| i02_1785       | c1963          | ydeH        | hypothetical protein                          |

| <b>Clone D</b> | <b>CFT 073</b> | <b>Gene</b> | <b>Product</b>                                   |
|----------------|----------------|-------------|--------------------------------------------------|
| i02_1786       |                | /           | conserved hypothetical protein                   |
| i02_1787       | c1964          | dcp         | dipeptidyl carboxypeptidase II                   |
| i02_1788       | c1965          | ydfG        | 3-hydroxy acid dehydrogenase                     |
| i02_1789       | c1966          | ydfH        | putative transcriptional regulator YdfH          |
| i02_1790       | c1967          | ydfZ        | hypothetical protein                             |
| i02_1791       | c1968          | /           | oxidoreductase ydfI                              |
| i02_1792       | c1969          | ydfJ        | metabolite transport protein                     |
| i02_1793       | c1970          | rspB        | putative dehydrogenase                           |
| i02_1794       | c1971          | rspA        | starvation sensing protein rspA                  |
| i02_1795       | c1972          | ynfA        | hypothetical protein                             |
| i02_1796       | c1973          | ynfB        | hypothetical protein                             |
| i02_1797       | c1974          | speG        | spermidine N(1)-acetyltransferase                |
| i02_1798       | c1975          | ynfC        | hypothetical protein                             |
| i02_1799       | c1976          | ynfD        | hypothetical protein                             |
| i02_1800       | c1977          | ynfE        | putative dimethyl sulfoxide reductase chain ynfE |
| i02_1801       | c1978          | ynfF        | dimethyl sulfoxide reductase chain ynfF          |
| i02_1802       | c1979          | ynfG        | anaerobic dimethyl sulfoxide reductase chain     |
| i02_1803       | c1981          | ynfH        | anaerobic dimethyl sulfoxide reductase chain     |
|                | c1980          | /           | hypothetical protein                             |
| i02_1804       | c1982          | ynfI        | twin-arginine leader-binding protein DmsD        |
| i02_1805       | c1983          | ynfJ        | putative voltage-gated ClC-type chloride channel |
| i02_1806       | c1984          | bioD        | putative dithiobiotin synthetase                 |
| i02_1807       | c1985          | mlc         | Mlc protein                                      |
| i02_1808       | c1986          | ynfL        | putative transcriptional regulator YnfL          |
| i02_1809       | c1987          | ynfM        | putative transport protein YnfM                  |
|                | c1988          | asr         | acid shock protein precursor                     |
| i02_1810       | c1990          | /           | putative protease ydgD precursor                 |
| i02_1811       | c1991          | ydgE        | multidrug efflux system protein MdtI             |
| i02_1812       | c1992          | ydgF        | multidrug efflux system protein MdtJ             |
| i02_1813       | c1993          | tqsA        | putative transport protein                       |
| i02_1814       | c1994          | pntB        | pyridine nucleotide transhydrogenase             |
| i02_1815       | c1995          | pntA        | NAD(P) transhydrogenase subunit alpha            |
| i02_1816       | c1996          | ydgH        | hypothetical protein                             |
| i02_1817       | c1997          | ydgI        | putative arginine/ornithine antiporter           |
| i02_1818       | c1998          | ydgB        | short chain dehydrogenase                        |
| i02_1819       | c1999          | ydgC        | hypothetical protein                             |
| i02_1820       | c2000          | rstA        | DNA-binding transcriptional regulator RstA       |
| i02_1821       | c2001          | rstB        | sensor protein RstB                              |
| i02_1822       | c2002          | tus         | DNA replication terminus site-binding protein    |
| i02_1823       | c2003          | fumC        | fumarate hydratase                               |
| i02_1824       | c2004          | fumA        | fumarate hydratase class I, aerobic              |
| i02_1825       | c2005          | manA        | mannose-6-phosphate isomerase                    |
| i02_1826       | c2006          | ydgA        | hypothetical protein                             |
| i02_1827       | c2007          | uidC        | putative outer membrane porin protein            |
| i02_1828       | c2008          | uidB        | glucuronide transporter                          |
| i02_1829       | c2009          | uidA        | beta-D-glucuronidase                             |
| i02_1830       | c2010          | uidR        | uid operon repressor                             |
| i02_1831       | c2011          | hdhA        | 7-alpha-hydroxysteroid dehydrogenase             |
| i02_1832       | c2012          | mall        | DNA-binding transcriptional repressor Mall       |
| i02_1833       | c2013          | malX        | bifunctional maltose and glucose-specific PTS    |
| i02_1834       | c2014          | malY        | cystathionine beta-lyase                         |
| i02_1835       | c2015          | add         | adenosine deaminase                              |



| <b>Clone D</b> | <b>CFT 073</b> | <b>Gene</b> | <b>Product</b>                                 |
|----------------|----------------|-------------|------------------------------------------------|
| i02_1836       | c2016          | ydgJ        | putative oxidoreductase                        |
| i02_1837       |                | /           | hypothetical protein                           |
| i02_1838       | c2017          | ydgT        | oriC-binding nucleoid-associated protein       |
| i02_1839       | c2018          | ydgK        | hypothetical protein                           |
| i02_1840       | c2019          | /           | Na(+)-translocating NADH-quinone reductase     |
| i02_1841       | c2020          | /           | electron transport complex protein RnfB        |
| i02_1842       | c2021          | /           | electron transport complex protein RnfC        |
| i02_1843       | c2022          | rnfD        | electron transport complex protein RnfD        |
| i02_1844       | c2023          | /           | electron transport complex protein RnfG        |
| i02_1845       | c2024          | ydgQ        | electron transport complex RsxE subunit        |
| i02_1846       | c2025          | nth         | endonuclease III                               |
| i02_1847       |                | /           | hypothetical protein                           |
| i02_1848       | c2026          | tppB        | putative tripeptide transporter permease       |
| i02_1849       | c2027          | gst         | glutathionine S-transferase                    |
| i02_1850       | c2028          | pdxY        | pyridoxamine kinase                            |
| i02_1851       | c2029          | tyrS        | tyrosyl-tRNA synthetase                        |
| i02_1852       | c2030          | pdxH        | pyridoxamine 5'-phosphate oxidase              |
| i02_1853       | c2031          | ydhA        | lysozyme inhibitor                             |
| i02_1854       | c2032          | anmK        | anhydro-N-acetylmuramic acid kinase            |
| i02_1855       | c2033          | slyB        | Outer membrane lipoprotein slyB precursor      |
| i02_1856       | c2034          | slyA        | transcriptional regulator SlyA                 |
| i02_1857       |                | /           | hypothetical protein                           |
| i02_1858       | c2035          | ydhI        | hypothetical protein                           |
| i02_1859       | c2036          | ydhJ        | hypothetical protein                           |
| i02_1860       | c2037          | ydhK        | hypothetical protein                           |
| i02_1861       | c2038          | sodC        | superoxide dismutase                           |
| i02_1862       | c2039          | ydhF        | oxidoreductase ydhF                            |
|                | c2041          | /           | hypothetical protein                           |
| i02_1864       | c2042          | ydhM        | putative transcriptional regulator YdhM        |
| i02_1863       | c2040          | ydhL        | hypothetical protein                           |
| i02_1865       | c2043          | nemA        | N-ethylmaleimide reductase                     |
| i02_1866       | c2044          | gloA        | glyoxalase I                                   |
| i02_1867       | c2045          | rnt         | ribonuclease T                                 |
| i02_1869       | c2047          | /           | hypothetical protein                           |
| i02_1868       | c2046          | /           | hypothetical protein                           |
| i02_1870       | c2048          | ydhD        | hypothetical protein                           |
| i02_1871       | c2049          | ydhO        | hypothetical protein                           |
| i02_1872       | c2050          | sodB        | superoxide dismutase                           |
| i02_1873       | c2051          | ydhP        | putative transport protein YdhP                |
| i02_1874       |                | /           | hypothetical protein                           |
| i02_1875       | c2052          | purR        | DNA-binding transcriptional repressor PurR     |
| i02_1876       | c2053          | ydhB        | putative DNA-binding transcriptional regulator |
| i02_1877       | c2054          | ydhC        | inner membrane transport protein YdhC          |
| i02_1878       | c2055          | cfa         | cyclopropane fatty acyl phospholipid synthase  |
| i02_1879       | c2056          | ribE        | riboflavin synthase subunit alpha              |
| i02_1880       | c2057          | ydhE        | multidrug efflux protein                       |
| i02_1881       | c2058          | ydhQ        | hypothetical protein                           |
| i02_1882       | c2059          | /           | hypothetical protein                           |
| i02_1883       | c2060          | ydhS        | hypothetical protein                           |
|                | c2061          | /           | hypothetical protein                           |
| i02_1885       | c2063          | /           | hypothetical protein                           |
| i02_1884       | c2062          | ydhT        | hypothetical protein                           |

| <b>Clone D</b> | <b>CFT 073</b> | <b>Gene</b> | <b>Product</b>                                   |
|----------------|----------------|-------------|--------------------------------------------------|
| i02_1886       | c2064          | ydhU        | PhsC protein                                     |
| i02_1887       | c2065          | /           | putative ferredoxin-like protein ydhX            |
| i02_1888       | c2066          | ydhW        | hypothetical protein                             |
| i02_1889       | c2067          | ydhV        | putative oxidoreductase                          |
| i02_1890       | c2068          | /           | hypothetical protein                             |
| i02_1891       | c2069          | ydhZ        | hypothetical protein                             |
| i02_1892       | c2070          | /           | hypothetical protein                             |
| i02_1893       | c2071          | pykF        | pyruvate kinase                                  |
| i02_1894       | c2072          | lpp         | major outer membrane lipoprotein precursor       |
| i02_1895       | c2073          | ynhG        | hypothetical protein                             |
| i02_1896       | c2074          | ynhA        | cysteine desufuration protein SufE               |
| i02_1897       | c2075          | /           | bifunctional cysteine desulfurase/selenocysteine |
| i02_1898       | c2076          | ynhC        | cysteine desulfurase activator complex subunit   |
| i02_1899       | c2077          | sufC        | cysteine desulfurase ATPase component            |
| i02_1900       | c2078          | ynhE        | cysteine desulfurase activator complex subunit   |
| i02_1901       | c2079          | sufA        | iron-sulfur cluster assembly scaffold protein    |
| i02_1902       | c2080          | ydiH        | hypothetical protein                             |
| i02_1903       | c2081          | ydiI        | hypothetical protein                             |
| i02_1904       | c2082          | ydiJ        | hypothetical protein                             |
| i02_1905       | c2083          | ydiK        | putative inner membrane protein                  |
| i02_1906       | c2084          | ydiL        | hypothetical protein                             |
| i02_1907       | c2085          | ydiM        | putative transport protein YdiM                  |
| i02_1908       | c2086          | ydiN        | putative transport protein YdiN                  |
| i02_1909       | c2087          | aroE        | quininate/shikimate dehydrogenase                |
| i02_1910       | c2088          | aroD        | 3-dehydroquininate dehydratase                   |
| i02_1911       | c2089          | ydiF        | hypothetical protein                             |
| i02_1912       | c2090          | ydiO        | putative acyl-CoA dehydrogenase                  |
| i02_1913       | c2091          | ydiP        | putative transcriptional regulator YdiP          |
| i02_1914       | c2092          | /           | hypothetical protein                             |
| i02_1915       | c2093          | ydiQ        | putative electron transfer flavoprotein YdiQ     |
| i02_1916       | c2094          | ydiR        | electron transfer flavoprotein subunit YdiR      |
| i02_1917       | c2095          | ydiS        | hypothetical protein                             |
| i02_1918       | c2096          | ydiT        | ferredoxin-like protein ydiT                     |
| i02_1919       | c2097          | ydiD        | short chain acyl-CoA synthetase                  |
| i02_1920       | c2098          | ppsA        | phosphoenolpyruvate synthase                     |
| i02_1921       | c2099          | ydiA        | hypothetical protein                             |
| i02_1922       | c2100          | aroH        | phospho-2-dehydro-3-deoxyheptonate aldolase      |
| i02_1923       | c2101          | ydiE        | hypothetical protein                             |
| i02_1924       | c2102          | ydiU        | hypothetical protein                             |
| i02_1925       | c2103          | ydiV        | hypothetical protein                             |
| i02_1926       | c2104          | nlpC        | lipoprotein NlpC                                 |
| i02_1927       | c2105          | btuD        | vitamin B12-transporter ATPase                   |
| i02_1928       | c2106          | btuE        | putative glutathione peroxidase                  |
| i02_1929       | c2107          | btuC        | vitamin B12-transporter permease                 |
| i02_1930       | c2108          | /           | hypothetical protein                             |
| i02_1931       | c2109          | ihfA        | integration host factor subunit alpha            |
| i02_1932       |                | pheT        | phenylalanyl-tRNA synthetase subunit beta        |
| i02_1933       | c2112          | pheS        | phenylalanyl-tRNA synthetase subunit alpha       |
|                | c5495          | pheM        | phenylalanyl-tRNA synthetase operon leader       |
| i02_1934       | c2113          | rpIT        | 50S ribosomal protein L20                        |
| i02_1935       | c2114          | /           | hypothetical protein                             |
| i02_1936       | c2115          | infC        | translation initiation factor IF-3               |

| <b>Clone D</b> | <b>CFT 073</b> | <b>Gene</b> | <b>Product</b>                                  |
|----------------|----------------|-------------|-------------------------------------------------|
| i02_1937       | c2116          | thrS        | threonyl-tRNA synthetase                        |
| i02_1938       | c2117          | /           | hypothetical protein                            |
| i02_1939       | c2118          | /           | hypothetical protein                            |
| i02_1940       | c2119          | /           | hypothetical protein                            |
| i02_1941       |                | /           | hypothetical protein                            |
| i02_1942       | c2120          | ydiY        | hypothetical protein                            |
| i02_1943       | c2121          | pfkB        | 6-phosphofructokinase 2                         |
|                | c2122          | /           | hypothetical protein                            |
| i02_1944       | c2123          | ydiZ        | hypothetical protein                            |
| i02_1945       | c2124          | yniA        | hypothetical protein                            |
| i02_1946       | c2125          | yniB        | hypothetical protein                            |
| i02_1947       | c2126          | yniC        | 2-deoxyglucose-6-phosphatase                    |
| i02_1948       | c2127          | ydjM        | hypothetical protein                            |
| i02_1949       | c2128          | ydjN        | putative symporter ydjN                         |
| i02_1950       | c2129          | /           | cell division modulator                         |
|                | c2130          | /           | hypothetical protein                            |
| i02_1951       | c2131          | katE        | hydroperoxidase II                              |
| i02_1952       | c2132          | ydjC        | hypothetical protein                            |
| i02_1953       | c2133          | celF        | 6-phospho-beta-glucosidase                      |
| i02_1954       | c2134          | celD        | DNA-binding transcriptional regulator ChbR      |
| i02_1955       | c2135          | celC        | N,N'-diacetylchitobiose-specific PTS system     |
| i02_1956       | c2136          | celB        | N,N'-diacetylchitobiose-specific PTS system     |
| i02_1957       | c2137          | celA        | N,N'-diacetylchitobiose-specific PTS system     |
| i02_1958       | c2138          | osmE        | DNA-binding transcriptional activator OsmE      |
| i02_1959       | c2139          | nadE        | NAD synthetase                                  |
| i02_1960       | c2140          | ydjQ        | nucleotide excision repair endonuclease         |
| i02_1961       | c2141          | ydjR        | hypothetical protein                            |
|                | c2142          | /           | hypothetical protein                            |
| i02_1962       | c2143          | spy         | periplasmic protein                             |
| i02_1963       | c2144          | ydjS        | succinylglutamate desuccinylase                 |
| i02_1964       | c2145          | /           | succinylarginine dihydrolase                    |
| i02_1965       | c2146          | astD        | succinylglutamic semialdehyde dehydrogenase     |
| i02_1966       | c2147          | /           | arginine succinyltransferase                    |
| i02_1967       | c2148          | argD        | bifunctional succinylornithine                  |
| i02_1968       | c2149          | /           | hypothetical protein                            |
| i02_1969       | c2150          | xthA        | exonuclease III                                 |
| i02_1970       | c2151          | ydjX        | hypothetical protein                            |
| i02_1971       | c2152          | ydjY        | hypothetical protein                            |
| i02_1972       | c2153          | ydjZ        | hypothetical protein                            |
| i02_1973       | c2154          | ynjA        | hypothetical protein                            |
| i02_1974       | c2155          | /           | putative ABC transporter solute-binding protein |
| i02_1975       | c2156          | ynjC        | ABC transporter permease                        |
| i02_1976       | c2157          | ynjD        | ABC transporter ATP-binding protein             |
| i02_1977       | c2158          | /           | putative thiosulfate sulfurtransferase ynjE     |
| i02_1978       | c2159          | ynjF        | hypothetical protein                            |
| i02_1979       | c2160          | /           | pyrimidine (deoxy)nucleoside triphosphate       |
| i02_1980       | c2161          | ynjH        | hypothetical protein                            |
| i02_1981       | c2162          | gdhA        | glutamate dehydrogenase                         |
| i02_1982       | c2163          | /           | hypothetical protein                            |
| i02_1983       | c2164          | ybeW        | chaperone protein hscC                          |
| i02_1984       | c2165          | /           | hypothetical protein                            |
| i02_1985       | c2166          | topB        | DNA topoisomerase III                           |

| <b>Clone D</b> | <b>CFT 073</b> | <b>Gene</b> | <b>Product</b>                           |
|----------------|----------------|-------------|------------------------------------------|
| i02_1986       | c2167          | selD        | selenophosphate synthetase               |
| i02_1987       | c2168          | ydjA        | hypothetical protein                     |
| i02_1988       | c2169          | /           | hypothetical protein                     |
| i02_1989       | c2170          | sppA        | protease 4                               |
| i02_1990       | c2171          | ansA        | cytoplasmic asparaginase I               |
| i02_1991       | c2172          | ydjB        | nicotinamidase/pyrazinamidase            |
| i02_1992       | c2173          | ydjE        | metabolite transporter                   |
| i02_1993       | c2174          | ydjF        | putative transcriptional regulator YdjF  |
| i02_1994       | c2175          | ydjG        | oxidoreductase ydjG                      |
| i02_1995       | c2176          | ydjH        | putative sugar kinase ydjH               |
| i02_1996       | c2177          | ydjI        | hypothetical protein                     |
| i02_1997       | c2178          | ydjJ        | hypothetical protein                     |
| i02_1998       | c2179          | ydjK        | metabolite transporter                   |
| i02_1999       | c2180          | /           | hypothetical protein                     |
| i02_2000       | c2181          | ydjL        | hypothetical protein                     |
| i02_2001       | c2182          | yeaC        | hypothetical protein                     |
| i02_2002       | c2183          | yeaA        | methionine sulfoxide reductase B         |
| i02_2003       | c2184          | gapA        | glyceraldehyde-3-phosphate dehydrogenase |
| i02_2004       | c2185          | yeaD        | hypothetical protein                     |
| i02_2005       | c2186          | yeaE        | hypothetical protein                     |
| i02_2006       | c2187          | yeaF        | MltA-interacting protein precursor       |
| i02_2007       | c2188          | yeaG        | hypothetical protein                     |
| i02_2008       | c2189          | yeaH        | hypothetical protein                     |
| i02_2009       | c2190          | yeaI        | hypothetical protein                     |
| i02_2010       | c2191          | yeaJ        | hypothetical protein                     |
| i02_2011       | c2192          | yeaK        | hypothetical protein                     |
| i02_2012       | c2193          | /           | hypothetical protein                     |
| i02_2013       | c2194          | yeaL        | hypothetical protein                     |
| i02_2014       | c2195          | yeaM        | putative transcriptional regulator YeaM  |
| i02_2015       | c2196          | yeaN        | putative transport protein YeaN          |
| i02_2016       | c2197          | yeaO        | hypothetical protein                     |
| i02_2017       | c2198          | yoaF        | hypothetical protein                     |
| i02_2018       | c2199          | yeaP        | hypothetical protein                     |
| i02_2019       |                | /           | hypothetical protein                     |
| i02_2020       | c2200          | yeaQ        | hypothetical protein                     |
| i02_2021       | c2201          | /           | hypothetical protein                     |
|                | c2203          | /           | hypothetical protein                     |
| i02_2022       | c2202          | yoaG        | hypothetical protein                     |
| i02_2024       |                | /           | hypothetical protein                     |
| i02_2023       | c2204          | yeaR        | hypothetical protein                     |
| i02_2025       | c2205          | yeaS        | leucine export protein LeuE              |
|                | c2207          | /           | hypothetical protein                     |
| i02_2026       | c2206          | /           | hypothetical protein                     |
| i02_2028       | c2208          | rnd         | ribonuclease D                           |
| i02_2029       | c2209          | fadD        | long-chain-fatty-acid--CoA ligase        |
| i02_2030       | c2210          | yeaY        | lipoprotein yeaY precursor               |
| i02_2031       | c2211          | yeaZ        | hypothetical protein                     |
| i02_2032       | c2212          | /           | ATP-dependent helicase yoaA              |
| i02_2033       | c2213          | yoaB        | hypothetical protein                     |
| i02_2034       |                | /           | hypothetical protein                     |
| i02_2035       | c2214          | yoaC        | hypothetical protein                     |
| i02_2036       | c2215          | /           | hypothetical protein                     |

| <b>Clone D</b> | <b>CFT 073</b> | <b>Gene</b> | <b>Product</b>                                                                       |
|----------------|----------------|-------------|--------------------------------------------------------------------------------------|
|                | c2216          | yoaH        | hypothetical protein                                                                 |
| i02_2037       | c2217          | pabB        | para-aminobenzoate synthase component I                                              |
| i02_2038       | c2218          | yeaB        | hypothetical protein                                                                 |
| i02_2039       | c2219          | sdaA        | L-serine dehydratase 1                                                               |
|                | c2220          | /           | hypothetical protein                                                                 |
| i02_2040       | c2221          | yoaD        | hypothetical protein                                                                 |
| i02_2041       | c2222          | yoaE        | hypothetical protein                                                                 |
| i02_2042       | c2223          | manX        | PTS system, mannose-specific IIAB component                                          |
| i02_2043       | c2224          | manY        | PTS system, mannose-specific IIC component                                           |
|                | c2225          | /           | hypothetical protein                                                                 |
| i02_2044       | c2226          | manZ        | mannose-specific PTS system protein IID                                              |
| i02_2045       | c2227          | yobD        | hypothetical protein                                                                 |
| i02_2046       | c2228          | yebN        | hypothetical protein                                                                 |
| i02_2047       | c2229          | rrmA        | 23S rRNA methyltransferase A                                                         |
|                | c2230          | /           | hypothetical protein                                                                 |
| i02_2048       | c2231          | cspC        | cold shock-like protein CspC                                                         |
| i02_2050       |                | /           | hypothetical protein                                                                 |
| i02_2049       | c2232          | yobF        | hypothetical protein                                                                 |
| i02_2051       | c2233          | yebO        | hypothetical protein                                                                 |
| i02_2052       | c2234          | yobG        | hypothetical protein                                                                 |
| i02_2053       | c2235          | /           | hypothetical protein                                                                 |
| i02_2054       | c2236          | /           | transcriptional regulator kdgR                                                       |
| i02_2055       | c2237          | yebQ        | putative transport protein YebQ                                                      |
| i02_2056       | c2238          | htpX        | heat shock protein HtpX                                                              |
| i02_2057       | c2239          | prc         | carboxy-terminal protease                                                            |
| i02_2058       | c2240          | proQ        | putative solute/DNA competence effector                                              |
| i02_2059       | c2241          | /           | hypothetical protein                                                                 |
| i02_2060       | c2242          | yebS        | hypothetical protein                                                                 |
| i02_2061       | c2243          | yebT        | hypothetical protein                                                                 |
| i02_2062       | c2244          | yebU        | rRNA (cytosine-C(5)-)-methyltransferase RsmF                                         |
| i02_2063       | c2245          | yebV        | hypothetical protein                                                                 |
| i02_2064       | c2246          | yebW        | hypothetical protein                                                                 |
| i02_2065       | c2247          | pphA        | serine/threonine protein phosphatase 1                                               |
| i02_2066       | c2248          | /           | hypothetical protein                                                                 |
| i02_2067       | c2249          | yebY        | hypothetical protein                                                                 |
| i02_2068       | c2250          | yebZ        | hypothetical protein                                                                 |
| i02_2069       | c2251          | /           | hypothetical protein                                                                 |
| i02_2070       | c2252          | holE        | DNA polymerase III subunit theta                                                     |
| i02_2071       | c2253          | yobB        | hypothetical protein                                                                 |
| i02_2072       | c2254          | /           | exodeoxyribonuclease X                                                               |
| i02_2073       | c2256          | ptrB        | protease II                                                                          |
| i02_2074       | c2257          | /           | hypothetical protein                                                                 |
| i02_2075       | c2258          | yebE        | hypothetical protein                                                                 |
| i02_2076       | c2259          | yebF        | hypothetical protein                                                                 |
| i02_2077       | c2260          | yebG        | DNA damage-inducible protein YebG                                                    |
| i02_2078       |                | purK        | phosphoribosylaminoimidazole carboxylase<br>ATPase                                   |
| i02_2079       | c2263          | eda         | keto-hydroxyglutarate-aldolase/ 2-keto-4-<br>hydroxyglutarate aldolase decarboxylase |
| i02_2080       | c2264          | edd         | phosphogluconate dehydratase                                                         |
| i02_2081       | c2265          | zwf         | glucose-6-phosphate 1-dehydrogenase                                                  |
| i02_2082       | c2266          | /           | hypothetical protein                                                                 |

| <b>Clone D</b> | <b>CFT 073</b> | <b>Gene</b> | <b>Product</b>                                  |
|----------------|----------------|-------------|-------------------------------------------------|
| i02_2083       | c2267          | yebK        | DNA-binding transcriptional regulator HexR      |
| i02_2084       | c2268          | pykA        | pyruvate kinase                                 |
| i02_2085       | c2269          | msbB        | lipid A biosynthesis (KDO)2-(lauroyl)-lipid IVA |
| i02_2086       | c2270          | yebA        | hypothetical protein                            |
| i02_2087       | c2271          | znuA        | high-affinity zinc transporter periplasmic      |
| i02_2088       | c2272          | znuC        | high-affinity zinc transporter ATPase           |
| i02_2089       | c2273          | znuB        | high-affinity zinc transporter membrane         |
| i02_2090       | c2274          | ruvB        | Holliday junction DNA helicase RuvB             |
| i02_2091       | c2275          | ruvA        | Holliday junction DNA helicase RuvA             |
| i02_2092       | c2276          | yebB        | hypothetical protein                            |
| i02_2093       | c2277          | ruvC        | Holliday junction resolvase                     |
| i02_2094       | c2278          | yebC        | hypothetical protein                            |
| i02_2095       | c2279          | ntpA        | dATP pyrophosphohydrolase                       |
| i02_2096       | c2280          | aspS        | aspartyl-tRNA synthetase                        |
| i02_2097       | c2281          | yecD        | hypothetical protein                            |
| i02_2098       | c2282          | yecE        | hypothetical protein                            |
| i02_2099       | c2283          | yecN        | hypothetical protein                            |
| i02_2100       | c2284          | yecO        | hypothetical protein                            |
| i02_2101       | c2285          | yecP        | hypothetical protein                            |
| i02_2102       | c2286          | bisZ        | trimethylamine-N-oxide reductase 2 precursor    |
| i02_2104       | c2287          | yecK        | cytochrome c-type protein torY                  |
| i02_2105       | c2288          | /           | hypothetical protein                            |
| i02_2106       | c2289          | /           | copper homeostasis protein CutC                 |
| i02_2107       | c2290          | yecM        | hypothetical protein                            |
| i02_2108       | c2291          | argS        | arginyl-tRNA synthetase                         |
| i02_2109       | c2292          | flhE        | flagellar protein flhE precursor                |
| i02_2110       | c2293          | flhA        | flagellar biosynthesis protein FlhA             |
| i02_2111       | c2294          | flhB        | flagellar biosynthesis protein FlhB             |
| i02_2112       | c2295          | /           | hypothetical protein                            |
| i02_2113       | c2296          | cheZ        | chemotaxis regulator CheZ                       |
| i02_2114       | c2297          | cheY        | chemotaxis regulatory protein CheY              |
| i02_2115       | c2298          | cheB        | chemotaxis-specific methylesterase              |
| i02_2116       | c2299          | cheR        | chemotaxis methyltransferase CheR               |
| i02_2117       |                | /           | methyl-accepting protein IV                     |
| i02_2118       | c2300          | /           | hypothetical protein                            |
| i02_2119       | c2301          | tar         | methyl-accepting chemotaxis protein II          |
| i02_2120       | c2302          | cheW        | purine-binding chemotaxis protein               |
| i02_2121       | c2303          | cheA        | chemotaxis protein CheA                         |
| i02_2122       | c2304          | motB        | flagellar motor protein MotB                    |
| i02_2123       | c2305          | motA        | flagellar motor protein MotA                    |
| i02_2124       | c2306          | flhC        | transcriptional activator FlhC                  |
| i02_2125       | c2308          | flhD        | transcriptional activator FlhD                  |
| i02_2126       | c2309          | yecG        | universal stress protein UspC                   |
| i02_2127       | c2310          | otsA        | trehalose-6-phosphate synthase                  |
| i02_2128       | c2311          | otsB        | trehalose-6-phosphate phosphatase               |
| i02_2129       | c2312          | araH        | L-arabinose transporter permease protein        |
| i02_2130       | c2313          | araG        | L-arabinose transporter ATP-binding protein     |
| i02_2131       | c2314          | araF        | L-arabinose-binding periplasmic protein         |
| i02_2132       | c2315          | yecI        | Ferritin-like protein 2                         |
| i02_2133       | c2316          | /           | hypothetical protein                            |
| i02_2134       | c2317          | /           | hypothetical protein                            |
|                | c2318          | /           | hypothetical protein                            |

| <b>Clone D</b> | <b>CFT 073</b> | <b>Gene</b> | <b>Product</b>                                            |
|----------------|----------------|-------------|-----------------------------------------------------------|
| i02_2135       | c2319          | yecR        | hypothetical protein                                      |
| i02_2136       | c2320          | /           | hypothetical protein                                      |
| i02_2137       | c2321          | ftn         | ferritin                                                  |
| i02_2138       | c2322          | yecH        | hypothetical protein                                      |
| i02_2139       | c2323          | tyrP        | tyrosine transporter                                      |
| i02_2140       | c2324          | yecA        | hypothetical protein                                      |
| i02_2141       | c2325          | pgsA        | phosphatidylglycerophosphate synthetase                   |
| i02_2142       | c2326          | uvrC        | excinuclease ABC subunit C                                |
| i02_2143       | c2327          | uvrY        | response regulator                                        |
| i02_2144       | c2328          | /           | hypothetical protein                                      |
| i02_2145       | c2329          | yecF        | hypothetical protein                                      |
| i02_2146       | c2330          | sdiA        | DNA-binding transcriptional activator SdiA                |
| i02_2147       | c2331          | yecC        | putative amino-acid ABC transporter ATP-binding component |
| i02_2148       | c2332          | yecS        | amino-acid ABC transporter permease protein               |
| -              | c2334          | /           | transposase                                               |
| i02_2149       | c2333          | yedO        | D-cysteine desulfhydrase                                  |
| i02_2150       | c2335          | fliY        | cystine transporter subunit                               |
| i02_2151       | c2336          | fliZ        | flagella biosynthesis protein FliZ                        |
| i02_2152       | c2337          | fliA        | flagellar biosynthesis sigma factor                       |
| i02_2153       |                | /           | hypothetical protein                                      |
| i02_2154       | c2338          | fliC        | flagellin                                                 |
| i02_2155       | c2339          | fliD        | flagellar capping protein                                 |
| i02_2156       | c2340          | fliS        | flagellar protein FliS                                    |
| i02_2157       | c2341          | fliT        | flagellar biosynthesis protein FliT                       |
| i02_2158       | c2342          | amyA        | cytoplasmic alpha-amylase                                 |
| i02_2159       | c2343          | yedD        | hypothetical protein                                      |
| i02_2160       | c2344          | yedE        | putative inner membrane protein                           |
| i02_2161       | c2345          | yedF        | hypothetical protein                                      |
| i02_2162       | c2346          | yedK        | hypothetical protein                                      |
|                | c2347          | /           | hypothetical protein                                      |
| i02_2163       | c2348          | /           | Outer membrane porin protein nmpC precursor               |
| i02_2164       | c2349          | ybcM        | putative transcriptional regulator YbcM                   |
|                | c2351          | /           | hypothetical protein                                      |
| i02_2165       | c2350          | ybcL        | putative kinase inhibitor                                 |
| i02_2167       | c2352          | emrE        | multidrug efflux protein                                  |
| i02_2168       | c2353          | fliE        | flagellar hook-basal body protein FliE                    |
| i02_2169       | c2354          | fliF        | flagellar MS-ring protein                                 |
| i02_2170       | c2355          | fliG        | flagellar motor switch protein G                          |
| i02_2172       | c2357          | fliH        | flagellar assembly protein H                              |
| i02_2171       | c2356          | /           | hypothetical protein                                      |
| i02_2173       | c2358          | fliI        | flagellum-specific ATP synthase                           |
| i02_2174       | c2359          | fliJ        | flagellar biosynthesis chaperone                          |
| i02_2175       | c2360          | fliK        | flagellar hook-length control protein                     |
| i02_2176       | c2361          | fliL        | flagellar basal body-associated protein FliL              |
| i02_2177       | c2362          | fliM        | flagellar motor switch protein FliM                       |
| i02_2178       | c2363          | fliN        | flagellar motor switch protein FliN                       |
| i02_2179       | c2364          | fliO        | flagellar biosynthesis protein FliO                       |
| i02_2180       | c2365          | fliP        | flagellar biosynthesis protein FliP                       |
| i02_2181       | c2366          | fliQ        | flagellar biosynthesis protein FliQ                       |
| i02_2182       | c2367          | fliR        | flagellar biosynthesis protein FliR                       |

| <b>Clone D</b> | <b>CFT 073</b> | <b>Gene</b> | <b>Product</b>                                        |
|----------------|----------------|-------------|-------------------------------------------------------|
| i02_2183       | c2369          | rcaA        | colanic acid capsular biosynthesis activation protein |
|                | c2370          | dsrB        | hypothetical protein                                  |
| i02_2184       |                | /           | hypothetical protein                                  |
|                | c2371          | /           | hypothetical protein                                  |
| i02_2185       | c2372          | yodD        | hypothetical protein                                  |
| i02_2186       | c2373          | yedP        | mannosyl-3-phosphoglycerate phosphatase               |
| i02_2187       | c2374          | yedQ        | hypothetical protein                                  |
| i02_2188       | c2375          | /           | hypothetical protein                                  |
| i02_2189       | c2376          | yodC        | hypothetical protein                                  |
| i02_2190       | c2377          | yedI        | hypothetical protein                                  |
| i02_2191       | c2378          | yedA        | hypothetical protein                                  |
| i02_2192       | c2379          | vsr         | very short patch repair protein                       |
| i02_2193       | c2380          | dcm         | DNA cytosine methylase                                |
| i02_2194       | c2381          | yedJ        | hypothetical protein                                  |
| i02_2195       | c2382          | yedR        | hypothetical protein                                  |
| i02_2196       | c2383          | /           | Outer membrane protein N precursor                    |
| i02_2197       |                | /           | conserved hypothetical protein                        |
| i02_2198       | c2385          | yedU        | chaperone protein HchA                                |
| i02_2199       | c2386          | yedV        | putative sensor-like histidine kinase yedV            |
| i02_2200       | c2387          | yedW        | transcriptional regulatory protein YedW               |
| i02_2201       | c2388          | /           | transthyretin-like protein precursor                  |
| i02_2202       | c2389          | yedY        | putative sulfite oxidase subunit YedY                 |
| i02_2203       | c2390          | yedZ        | putative sulfite oxidase subunit YedZ                 |
| i02_2204       | c2391          | yodA        | hypothetical protein                                  |
| i02_2205       |                | /           | hypothetical protein                                  |
| i02_2206       | c2392          | /           | P4 family integrase                                   |
| i02_2207       | c2393          | /           | hypothetical protein                                  |
| i02_2208       | c2394          | /           | PilV-like protein                                     |
| i02_2209       | c2395          | /           | putative type IV pilin protein precursor              |
| i02_2210       | c2396          | /           | hypothetical protein                                  |
| i02_2211       | c2397          | /           | hypothetical protein                                  |
| i02_2212       | c2398          | /           | hypothetical protein                                  |
| i02_2213       | c2399          | /           | hypothetical protein                                  |
| i02_2214       | c2400          | /           | hypothetical protein                                  |
| i02_2215       | c2401          | /           | hypothetical protein                                  |
| i02_2216       | c2402          | /           | hypothetical protein                                  |
| i02_2217       | c2403          | /           | hypothetical protein                                  |
| i02_2218       | c2404          | /           | hypothetical protein                                  |
| i02_2219       |                | /           | hypothetical protein                                  |
| i02_2220       | c2405          | /           | hypothetical protein                                  |
| i02_2221       | c2406          | /           | hypothetical protein                                  |
| i02_2222       | c2407          | /           | hypothetical protein                                  |
| i02_2223       | c2408          | /           | hypothetical protein                                  |
| i02_2225       |                | /           | hypothetical protein                                  |
| i02_2224       | c2409          | /           | hypothetical protein                                  |
| i02_2226       | c2410          | /           | hypothetical protein                                  |
| i02_2227       | c2411          | /           | DNA-binding protein H-NS                              |
| i02_2228       | c2412          | /           | hypothetical protein                                  |
| i02_2229       | c2413          | /           | hypothetical protein                                  |
| i02_2230       | c2414          | /           | hypothetical protein                                  |
| i02_2231       | c2415          | /           | hypothetical protein                                  |



| Clone D   | CFT 073 | Gene | Product                                                  |
|-----------|---------|------|----------------------------------------------------------|
| i02_2232  |         | /    | putative regulatory protein                              |
| i02_2233  | c2416   | /    | hypothetical protein                                     |
| i02_2234  | c2417   | yeel | hypothetical protein                                     |
| i02_2235  | c2418   | /    | prophage P4 integrase                                    |
| i02_2236  | c2419   | /    | salicylate synthase Irp9                                 |
| i02_2237  | c2420   | /    | putative cytoplasmic transmembrane protein               |
| i02_2238  | c2421   | /    | ABC transporter                                          |
| i02_2239  | c2422   | /    | putative inner membrane ABC-transporter                  |
| i02_2240  | c2423   | /    | putative AraC type regulator                             |
| i02_2241  | c2424   | /    | putative peptide synthetase                              |
| -         | c2425   | /    | similar Transposase for insertion sequence element IS200 |
| i02_2241  | c2426   | /    | putative peptide synthetase                              |
| i02_2242  | c2427   | /    | putative peptide/polyketide synthetase protein           |
| i02_2242  | c2428   | /    | hypothetical protein                                     |
| i02_2242  | c2429   | /    | hypothetical protein                                     |
| i02_2244  | c2430   | /    | hypothetical protein                                     |
|           | c2431   | /    | hypothetical protein                                     |
| i02_2245  | c2432   | /    | putative thioesterase                                    |
| i02_2246  | c2433   | /    | 2,3-dihydroxybenzoate-AMP ligase                         |
| i02_2246  | c2434   | /    | putative salicyl-AMP ligase                              |
|           | c2435   | /    | hypothetical protein                                     |
| i02_2247  | c2436   | fyuA | putative pesticin receptor precursor                     |
| i02_2248  | c2437   | /    | hypothetical protein                                     |
| i02_2249  | c2438   | /    | hypothetical protein                                     |
| i02_2250  | c2439   | /    | hypothetical protein                                     |
| i02_2250a | c2440   | /    | hypothetical protein                                     |
| i02_2251  | c2441   | /    | hypothetical protein                                     |
| i02_2251  | c2442   | /    | hypothetical protein                                     |
| i02_2252  | c2443   | shiA | shikimate transporter                                    |
| i02_2253  | c2444   | amn  | AMP nucleosidase                                         |
| i02_2254  | c2445   | yeeN | hypothetical protein                                     |
| i02_2255  |         | /    | hypothetical protein                                     |
| i02_2256  | c2446   | nac  | nitrogen assimilation transcriptional regulator          |
| i02_2257  | c2447   | cbl  | transcriptional regulator Cbl                            |
| i02_2258  | c2448   | yeeO | hypothetical protein                                     |
| i02_2259  | c2449   | /    | prophage P4 integrase                                    |
| i02_2260  | c2450   | /    | hypothetical protein                                     |
| i02_2261  | c2451   | /    | putative thioesterase                                    |
| i02_2262  | c2452   | /    | hypothetical protein                                     |
| i02_2263  | c2453   | /    | putative polyketide synthase                             |
| i02_2264  | c2454   | /    | hypothetical protein                                     |
| i02_2264  | c2455   | /    | putative peptide synthetase                              |
| i02_2266  | c2456   | /    | hypothetical protein                                     |
| i02_2267  | c2457   | /    | putative amidase                                         |
| i02_2268  | c2458   | /    | putative peptide synthetase                              |
| i02_2269  | c2459   | /    | putative peptide synthetase                              |
| i02_2270  | c2460   | /    | putative polyketide synthase                             |
|           | c2462   | /    | hypothetical protein                                     |
| i02_2271  | c2461   | /    | hypothetical protein                                     |
| i02_2273  | c2463   | /    | putative transacylase                                    |
| i02_2274  | c2464   | /    | putative acyl-coa dehydrogenase                          |

| Clone D  | CFT 073 | Gene | Product                                      |
|----------|---------|------|----------------------------------------------|
|          | c2465   | /    | hypothetical protein                         |
| i02_2275 | c2466   | /    | hypothetical protein                         |
| i02_2276 | c2467   | /    | putative 3-hydroxyacyl-CoA dehydrogenase     |
| i02_2277 | c2468   | /    | putative polyketide synthase                 |
| i02_2279 | c2469   | /    | putative polyketide synthase                 |
| i02_2279 | c2470   | /    | putative peptide/polyketide synthase         |
| i02_2280 | c2471   | /    | hypothetical protein                         |
| i02_2281 | c2472   | /    | transposase                                  |
| i02_2283 | c2473   | /    | transposase                                  |
| i02_2282 |         | /    | hypothetical protein                         |
| i02_2284 | c2474   | /    | transposase                                  |
| i02_2285 | c2475   | /    | hypothetical protein                         |
| i02_2286 | c2476   | erfK | hypothetical protein                         |
| i02_2287 | c2477   | cobT | nicotinate-nucleotide--dimethylbenzimidazole |
| i02_2288 | c2478   | cobS | cobalamin synthase                           |
| i02_2289 | c2479   | cobU | adenosylcobinamide                           |
| i02_2290 | c2480   | /    | hypothetical protein                         |
| i02_2291 | c2481   | /    | hypothetical protein                         |
| i02_2292 | c2482   | /    | putative outer membrane receptor for iron    |
| i02_2293 | c2483   | /    | hypothetical protein                         |
| i02_2294 | c2484   | /    | hypothetical protein                         |
| i02_2295 | c2485   | /    | hypothetical protein                         |
| i02_2296 | c2486   | /    | hypothetical protein                         |
| i02_2297 | c2489   | /    | putative transferase                         |
| i02_2298 | c2490   | /    | hypothetical protein                         |
| i02_2299 |         | /    | hypothetical protein                         |
| i02_2300 | c2492   | /    | putative carbohydrate kinase                 |
| i02_2301 | c2493   | /    | hypothetical protein                         |
| i02_2302 | c2494   | /    | hypothetical protein                         |
| i02_2303 | c2495   | /    | putative phosphotriesterase-related protein  |
|          | c2496   | /    | hypothetical protein                         |
| i02_2304 | c2497   | /    | transposase                                  |
| i02_2305 | c2498   | /    | hypothetical protein                         |
| i02_2306 | c2499   | /    | hypothetical protein                         |
| i02_2307 | c2500   | /    | hypothetical protein                         |
| i02_2309 | c2502   | /    | hypothetical protein                         |
| i02_2308 | c2501   | /    | hypothetical protein                         |
| i02_2310 | c2503   | /    | transposase                                  |
|          | c2504   | /    | hypothetical protein                         |
| i02_2312 | c2505   | /    | hypothetical protein                         |
| i02_2313 | c2506   | /    | hypothetical protein                         |
| -        | c2508   | /    | hypothetical protein                         |
| -        | c2509   | /    | insertion sequence ATP-binding protein       |
| i02_2313 | c2510   | /    | hypothetical protein                         |
| -        | c2508   | /    | hypothetical protein                         |
| -        | c2509   | /    | insertion sequence ATP-binding protein       |
| i02_2314 | c2511   | /    | transposase/IS protein                       |
| i02_2315 | c2512   | /    | transposase                                  |
| i02_2316 |         | /    | putative transposase subunit                 |
| i02_2317 | c2513   | /    | hypothetical protein                         |
| i02_2318 | c2514   | /    | hypothetical protein                         |
| i02_2319 | c2515   | /    | putative ABC transporter                     |

| Clone D  | CFT 073 | Gene | Product                                                                                           |
|----------|---------|------|---------------------------------------------------------------------------------------------------|
| i02_2320 | c2516   | /    | ABC transporter                                                                                   |
| i02_2321 | c2517   | /    | periplasmic binding protein                                                                       |
| i02_2322 | c2518   | /    | TonB dependent receptor                                                                           |
| i02_2323 | c2520   | /    | hypothetical protein                                                                              |
|          | c2521   | /    | hypothetical protein                                                                              |
| i02_2325 | c2522   | /    | hypothetical protein                                                                              |
| i02_2326 | c2523   | /    | hypothetical protein                                                                              |
| i02_2327 | c2524   | /    | hypothetical protein                                                                              |
| i02_2328 | c2525   | /    | hypothetical protein                                                                              |
| i02_2329 | c2526   | /    | hypothetical protein                                                                              |
|          | c2527   | /    | hypothetical protein                                                                              |
|          | c2529   | /    | putative radC-like protein yeeS                                                                   |
| i02_2330 | c2528   | /    | hypothetical protein                                                                              |
| i02_2331 | c2530   | /    | hypothetical protein                                                                              |
| i02_2332 | c2531   | /    | hypothetical protein                                                                              |
| i02_2333 | c2532   | /    | hypothetical protein                                                                              |
| i02_2334 | c2533   | yeeW | hypothetical protein                                                                              |
| i02_2335 |         | yoeF | hypothetical protein                                                                              |
| i02_2336 | c2534   | yeeX | hypothetical protein                                                                              |
|          | c2535   | /    | hypothetical protein                                                                              |
| i02_2337 | c2536   | yeeA | hypothetical protein                                                                              |
| i02_2338 | c2537   | sbmC | DNA gyrase inhibitor                                                                              |
| i02_2339 | c2538   | dacD | D-alanyl-D-alanine carboxypeptidase                                                               |
| i02_2340 | c2539   | sbcB | exonuclease I                                                                                     |
| i02_2341 | c2540   | yeeF | putative transport protein YeeF                                                                   |
|          | c2541   | /    | hypothetical protein                                                                              |
| i02_2342 | c2542   | yeeY | putative transcriptional regulator YeeY                                                           |
| i02_2343 | c2543   | /    | hypothetical protein                                                                              |
| i02_2344 | c2544   | /    | hypothetical protein                                                                              |
| i02_2345 | c2545   | yefM | antitoxin YefM                                                                                    |
|          | c5496   | hisL | his operon leader peptide                                                                         |
| i02_2346 | c2546   | hisG | ATP phosphoribosyltransferase                                                                     |
| i02_2347 | c2547   | hisD | histidinol dehydrogenase                                                                          |
| i02_2348 | c2548   | hisC | histidinol-phosphate aminotransferase                                                             |
| i02_2349 | c2549   | hisB | imidazole glycerol-phosphate                                                                      |
| i02_2350 | c2550   | hisH | imidazole glycerol phosphate synthase subunit                                                     |
|          |         |      | N-(5'-phospho-L-ribosyl-formimino)-5-amino-1-(5'-phosphoribosyl)-4-imidazolecarboxamide isomerase |
| i02_2351 | c2551   | hisA |                                                                                                   |
| i02_2352 | c2552   | hisF | imidazole glycerol phosphate synthase subunit                                                     |
| i02_2353 | c2553   | hisI | phosphoribosyl-AMP cyclohydrolase / phosphoribosyl-ATP pyrophosphatase                            |
| i02_2354 | c2554   | wzzB | chain length determinant protein                                                                  |
| i02_2355 | c2555   | ugd  | UDP-glucose 6-dehydrogenase                                                                       |
| i02_2356 | c2556   | gnd  | 6-phosphogluconate dehydrogenase                                                                  |
| i02_2357 | c2557   | manB | phosphomannomutase                                                                                |
| i02_2358 | c2558   | /    | mannose-1-phosphate guanylyltransferase                                                           |
| i02_2359 | c2559   | /    | hypothetical protein                                                                              |
| i02_2360 | c2560   | /    | UDP-glucose 4-epimerase                                                                           |
| i02_2361 | c2561   | /    | hypothetical protein                                                                              |
| i02_2362 | c2562   | /    | glycosyl transferase                                                                              |
| i02_2363 | c2563   | /    | glycosyl transferase                                                                              |

| <b>Clone D</b> | <b>CFT 073</b> | <b>Gene</b> | <b>Product</b>                                         |
|----------------|----------------|-------------|--------------------------------------------------------|
| i02_2364       | c2564          | /           | hypothetical protein                                   |
| i02_2365       | c2566          | /           | hypothetical protein                                   |
| i02_2366       | c2567          | galF        | UTP--glucose-1-phosphate uridylyltransferase           |
| i02_2367       | c2568          | wcaM        | putative colanic acid biosynthesis protein             |
| i02_2368       | c2569          | wcaL        | putative colanic acid biosynthesis glycosyltransferase |
| i02_2369       | c2570          | wcaK        | putative pyruvyl transferase                           |
| i02_2370       | c2571          | wzxC        | colanic acid exporter                                  |
| i02_2371       | c2572          | wcaJ        | putative UDP-glucose lipid carrier transferase         |
| i02_2373       | c2574          | /           | hypothetical protein                                   |
| i02_2372       | c2573          | cpsG        | phosphomannomutase                                     |
| i02_2374       | c2575          | cpsB        | mannose-1-phosphate guanylyltransferase                |
| i02_2375       | c2576          | wcaI        | putative glycosyl transferase                          |
| i02_2376       | c2577          | wcaH        | GDP-mannose mannosyl hydrolase                         |
| i02_2377       | c2578          | wcaG        | GDP-4-keto-6-L-galactose reductase                     |
| i02_2378       | c2579          | gmd         | GDP-mannose 4,6-dehydratase                            |
| i02_2379       | c2580          | wcaF        | putative colanic acid biosynthesis                     |
| i02_2380       | c2581          | wcaE        | putative glycosyl transferase                          |
| i02_2381       | c2582          | wcaD        | putative colanic acid biosynthesis protein             |
| i02_2382       | c2583          | wcaC        | putative glycosyl transferase                          |
| i02_2383       | c2584          | wcaB        | putative colanic acid biosynthesis                     |
| i02_2384       | c2585          | wcaA        | putative glycosyl transferase                          |
| i02_2385       | c2586          | /           | tyrosine kinase                                        |
| i02_2386       | c2587          | /           | hypothetical protein                                   |
| i02_2387       | c2588          | /           | hypothetical protein                                   |
| i02_2387       | c2589          | /           | hypothetical protein                                   |
| i02_2388       | c2590          | yegH        | hypothetical protein                                   |
| i02_2389       | c2591          | asmA        | putative assembly protein                              |
| i02_2390       | c2592          | dcd         | deoxycytidine triphosphate deaminase                   |
| i02_2391       | c2593          | udk         | uridine kinase                                         |
| i02_2392       | c2594          | yegE        | putative sensor protein                                |
| i02_2393       | c2595          | alkA        | 3-methyl-adenine DNA glycosylase II                    |
| i02_2394       | c2596          | yegD        | putative chaperone                                     |
| i02_2396       | c2597          | yegI        | hypothetical protein                                   |
| i02_2397       | c2598          | yegK        | hypothetical protein                                   |
| i02_2398       | c2599          | yegL        | hypothetical protein                                   |
| i02_2399       | c2600          | yegM        | multidrug efflux system subunit MdtA                   |
| i02_2400       | c2601          | yegN        | multidrug efflux system subunit MdtB                   |
| i02_2401       | c2602          | yegO        | multidrug efflux system subunit MdtC                   |
| i02_2402       | c2603          | yegB        | multidrug efflux system protein MdtE                   |
| i02_2403       | c2604          | baeS        | signal transduction histidine-protein kinase           |
| i02_2404       | c2605          | baeR        | DNA-binding transcriptional regulator BaeR             |
| i02_2405       | c2606          | yegP        | hypothetical protein                                   |
| i02_2406       | c2607          | /           | hypothetical protein                                   |
| i02_2407       | c2608          | /           | hypothetical protein                                   |
| i02_2409       | c2609          | /           | hypothetical protein                                   |
| i02_2410       | c2610          | /           | hypothetical protein                                   |
| i02_2411       | c2611          | yegQ        | putative protease yegQ                                 |
| i02_2412       | c2612          | /           | hypothetical protein                                   |
| i02_2413       |                | /           | hypothetical protein                                   |
| i02_2414       | c2613          | yegR        | hypothetical protein                                   |
| i02_2415       | c2614          | yegS        | lipid kinase                                           |

| <b>Clone D</b> | <b>CFT 073</b> | <b>Gene</b> | <b>Product</b>                                |
|----------------|----------------|-------------|-----------------------------------------------|
| i02_2416       | c2615          | /           | hypothetical protein                          |
| i02_2417       | c2616          | gatD        | galactitol-1-phosphate dehydrogenase          |
| i02_2418       | c2617          | gatC        | PTS system, galactitol-specific IIC component |
| i02_2419       | c2618          | gatB        | galactitol-specific PTS system component IIB  |
| i02_2420       | c2619          | gatA        | galactitol-specific PTS system component IIA  |
| i02_2421       | c2620          | gatZ        | putative tagatose 6-phosphate kinase gatZ     |
| i02_2422       | c2621          | gatY        | tagatose-bisphosphate aldolase                |
| -              | c2622          | /           | transposase                                   |
| i02_2424       | c2624          | /           | hypothetical protein                          |
| i02_2423       | c2623          | /           | fructose-bisphosphate aldolase                |
| i02_2425       | c2625          | yegT        | putative nucleoside transporter yegT          |
| i02_2426       | c2626          | yegU        | hypothetical protein                          |
| i02_2427       | c2627          | yegV        | putative sugar kinase yegV                    |
| i02_2428       | c2628          | yegW        | putative transcriptional regulator YegW       |
| i02_2429       | c2629          | yegX        | hypothetical protein                          |
| i02_2430       | c2630          | thiD        | phosphomethylpyrimidine kinase                |
| i02_2431       | c2631          | thiM        | hydroxyethylthiazole kinase                   |
| i02_2432       | c2632          | yohL        | hypothetical protein                          |
| i02_2433       | c2633          | yohM        | nickel/cobalt efflux protein RcnA             |
| i02_2434       | c2634          | yohN        | hypothetical protein                          |
| i02_2435       | c2635          | yehA        | hypothetical protein                          |
| i02_2436       | c2636          | yehB        | outer membrane usher protein yehB precursor   |
| i02_2437       | c2637          | yehC        | fimbrial chaperone yehC precursor             |
| i02_2438       | c2638          | yehD        | hypothetical protein                          |
| -              | c2639          | /           | transposase                                   |
| i02_2439       | c2640          | yehE        | hypothetical protein                          |
| i02_2440       | c2641          | mrp         | putative ATPase                               |
| i02_2441       | c2642          | metG        | methionyl-tRNA synthetase                     |
| i02_2442       | c2643          | /           | hypothetical protein                          |
| i02_2443       | c2644          | yehI        | hypothetical protein                          |
| i02_2444       | c2645          | /           | hypothetical protein                          |
| i02_2445       | c2646          | /           | hypothetical protein                          |
| i02_2446       | c2647          | /           | yehK protein                                  |
|                | c2648          | /           | hypothetical protein                          |
| i02_2447       | c2649          | yehL        | hypothetical protein                          |
| i02_2448       | c2650          | yehM        | hypothetical protein                          |
| i02_2449       | c2651          | yehP        | hypothetical protein                          |
| i02_2450       | c2652          | yehQ        | hypothetical protein                          |
| i02_2451       | c2653          | yehR        | lipoprotein yehR precursor                    |
| i02_2452       | c2654          | yehS        | hypothetical protein                          |
| i02_2453       | c2655          | yehT        | putative two-component response-regulator     |
| i02_2454       | c2656          | yehU        | hypothetical protein                          |
| i02_2455       | c2657          | yehV        | MerR-like regulator A                         |
| i02_2456       | c2658          | yehW        | ABC transporter permease                      |
| i02_2457       | c2659          | yehX        | ABC transporter ATP-binding protein           |
| i02_2458       | c2660          | yehY        | ABC transporter permease                      |
| i02_2459       | c2661          | yehZ        | hypothetical protein                          |
| i02_2462       | c2662          | /           | hypothetical protein                          |
| i02_2463       | c2663          | bgIX        | periplasmic beta-glucosidase precursor        |
| i02_2464       | c2664          | dld         | D-lactate dehydrogenase                       |
| i02_2465       | c2665          | pbpG        | D-alanyl-D-alanine endopeptidase              |
| i02_2466       | c2666          | /           | hypothetical protein                          |

| <b>Clone D</b> | <b>CFT 073</b> | <b>Gene</b> | <b>Product</b>                                 |
|----------------|----------------|-------------|------------------------------------------------|
| i02_2467       | c2667          | yohC        | hypothetical protein                           |
| i02_2468       | c2668          | yohD        | hypothetical protein                           |
| i02_2469       | c2669          | /           | hypothetical protein                           |
| i02_2469a      | c2670          | /           | hypothetical protein                           |
| i02_2470       | c2671          | yohG        | multidrug resistance outer membrane protein    |
| i02_2471       | c2672          | yohI        | tRNA-dihydrouridine synthase C                 |
| i02_2472       | c2673          | yohJ        | hypothetical protein                           |
| i02_2473       | c2674          | yohK        | hypothetical protein                           |
| i02_2474       | c2675          | cdd         | cytidine deaminase                             |
|                | c2676          | /           | hypothetical protein                           |
| i02_2476       | c2677          | sanA        | hypothetical protein                           |
| i02_2477       | c2678          | yeiS        | hypothetical protein                           |
| i02_2478       | c2679          | yeiT        | putative oxidoreductase                        |
| i02_2479       | c2680          | yeiA        | dihydropyrimidine dehydrogenase                |
| i02_2480       | c2681          | /           | hypothetical protein                           |
| i02_2481       | c2682          | mglC        | beta-methylgalactoside transporter             |
| i02_2482       | c2683          | mglA        | galactose/methyl galactoside transporter       |
| i02_2483       | c2684          | mglB        | D-galactose-binding periplasmic protein        |
| i02_2485       | c2686          | /           | hypothetical protein                           |
| i02_2484       | c2685          | galS        | DNA-binding transcriptional regulator GalS     |
| i02_2486       | c2687          | yeiB        | hypothetical protein                           |
| i02_2487       | c2688          | foIE        | GTP cyclohydrolase I                           |
| i02_2488       | c2689          | yeiG        | hypothetical protein                           |
| i02_2489       | c2690          | cirA        | colicin I receptor                             |
| i02_2490       | c2691          | lysP        | lysine transporter                             |
| i02_2491       | c2692          | yeiE        | putative DNA-binding transcriptional regulator |
| i02_2492       | c2693          | yeiH        | hypothetical protein                           |
| i02_2493       | c2694          | nfo         | endonuclease IV                                |
| i02_2494       | c2695          | yeiI        | hypothetical protein                           |
| i02_2495       |                | /           | hypothetical protein                           |
| i02_2497       | c2696          | rihB        | ribonucleoside hydrolase 2                     |
| i02_2498       | c2697          | yeiL        | DNA-binding transcriptional activator YeiL     |
| i02_2499       | c2698          | yeiM        | putative transport protein YeiM                |
| i02_2500       |                | yeiN        | hypothetical protein                           |
| i02_2501       | c2701          | yeiC        | hypothetical protein                           |
| i02_2502       | c2702          | fruA        | fructose-specific PTS system IIBC component    |
| i02_2503       | c2703          | fruK        | 1-phosphofructokinase                          |
| i02_2504       | c2704          | fruB        | fructose PTS transporter                       |
| i02_2505       | c2705          | /           | hypothetical protein                           |
| i02_2506       | c2706          | yeiO        | sugar efflux transporter B                     |
| i02_2508       | c2708          | yeiP        | elongation factor P                            |
| i02_2507       | c2707          | /           | hypothetical protein                           |
| i02_2509       | c2709          | yeiQ        | oxidoreductase yeiQ                            |
| i02_2510       | c2710          | yeiR        | hypothetical protein                           |
| i02_2511       | c2711          | yeiU        | hypothetical protein                           |
| i02_2512       | c2712          | spr         | putative outer membrane lipoprotein            |
| i02_2513       | c2713          | rtn         | hypothetical protein                           |
| i02_2514       | c2714          | yejA        | hypothetical protein                           |
| i02_2515       | c2715          | yejB        | ABC transporter permease                       |
| i02_2516       | c2716          | yejE        | ABC transporter permease                       |
| i02_2517       | c2717          | yejF        | ABC transporter ATP-binding protein            |
| i02_2518       | c2718          | yejG        | hypothetical protein                           |

| <b>Clone D</b> | <b>CFT 073</b> | <b>Gene</b> | <b>Product</b>                                  |
|----------------|----------------|-------------|-------------------------------------------------|
| i02_2519       | c2719          | bcr         | bicyclomycin/multidrug efflux system            |
| i02_2520       | c2720          | rsuA        | 16S rRNA pseudouridylate synthase A             |
| i02_2521       | c2721          | yejH        | hypothetical protein                            |
|                | c2723          | /           | hypothetical protein                            |
| i02_2522       | c2722          | rplY        | 50S ribosomal protein L25                       |
| i02_2523       | c2724          | yejK        | nucleoid-associated protein NdpA                |
| i02_2524       |                | /           | hypothetical protein                            |
| i02_2526       | c2725          | yejL        | hypothetical protein                            |
| i02_2527       | c2726          | yejM        | hypothetical protein                            |
|                | c2728          | /           | hypothetical protein                            |
| i02_2528       | c2727          | /           | hypothetical protein                            |
| i02_2529       | c2729          | /           | hypothetical protein                            |
| i02_2530       |                | /           | hypothetical protein                            |
| i02_2531       | c2730          | narP        | transcriptional regulator NarP                  |
| i02_2532       | c2731          | ccmH        | cytochrome c-type biogenesis protein ccmH       |
| i02_2533       | c2732          | dsbE        | Thiol:disulfide interchange protein dsbE        |
| i02_2534       | c2733          | ccmF        | cytochrome c-type biogenesis protein ccmF       |
| i02_2535       | c2734          | ccmE        | cytochrome c-type biogenesis protein CcmE       |
| i02_2536       | c2735          | ccmD        | Heme exporter protein D                         |
| i02_2537       | c2736          | ccmC        | Heme exporter protein C                         |
| i02_2538       | c2737          | ccmB        | Heme exporter protein B                         |
| i02_2539       | c2738          | ccmA        | cytochrome c biogenesis protein CcmA            |
|                | c2740          | /           | hypothetical protein                            |
| i02_2540       | c2739          | napC        | cytochrome c-type protein NapC                  |
|                | c2742          | /           | hypothetical protein                            |
| i02_2541       | c2741          | napB        | citrate reductase cytochrome c-type subunit     |
| i02_2542       | c2743          | napH        | quinol dehydrogenase membrane component         |
| i02_2543       | c2744          | napG        | quinol dehydrogenase periplasmic component      |
| i02_2544       | c2745          | napA        | nitrate reductase catalytic subunit             |
| i02_2545       | c2746          | napD        | assembly protein for periplasmic nitrate        |
| i02_2546       | c2747          | napF        | ferredoxin-type protein                         |
| i02_2547       | c2748          | /           | hypothetical protein                            |
| i02_2548       | c2749          | /           | hypothetical protein                            |
| i02_2549       | c2750          | eco         | ecotin                                          |
| i02_2550       |                | eco         | ecotin precursor                                |
| i02_2551       | c2751          | yojH        | malate:quinone oxidoreductase                   |
| i02_2552       | c2752          | yojI        | multidrug transporter membrane                  |
| i02_2553       | c2753          | alkB        | alkylated DNA repair protein AlkB               |
|                | c2755          | /           | hypothetical protein                            |
| i02_2554       | c2754          | ada         | ADA regulatory protein                          |
| i02_2555       | c2756          | yojL        | thiamine biosynthesis lipoprotein ApbE          |
|                | c2757          | /           | hypothetical protein                            |
| i02_2556       | c2758          | ompC        | outer membrane porin protein C                  |
| i02_2557       | c2759          | yojN        | phosphotransfer intermediate protein            |
| i02_2558       | c2760          | rcsB        | transcriptional regulator RcsB                  |
| i02_2559       | c2761          | rcsC        | hybrid sensory kinase in two-component          |
| i02_2560       | c2762          | atoS        | sensory histidine kinase AtoS                   |
| i02_2561       | c2763          | atoC        | acetoacetate metabolism regulatory protein AtoC |
| i02_2562       | c2764          | atoD        | acetyl-CoA:acetoacetyl-CoA transferase subunit  |
| i02_2563       | c2765          | atoA        | acetate CoA-transferase beta subunit            |
| i02_2564       | c2766          | atoE        | Short-chain fatty acids transporter             |
| i02_2565       | c2767          | atoB        | Acetyl-CoA acetyltransferase                    |

| <b>Clone D</b> | <b>CFT 073</b> | <b>Gene</b> | <b>Product</b>                                  |
|----------------|----------------|-------------|-------------------------------------------------|
| i02_2566       | c2768          | yfaP        | hypothetical protein                            |
| i02_2567       | c2769          | yfaQ        | hypothetical protein                            |
| i02_2568       | c2770          | /           | hypothetical protein                            |
| i02_2569       | c2771          | yfaT        | hypothetical protein                            |
| i02_2570       | c2772          | yfaA        | hypothetical protein                            |
| i02_2571       | c2773          | gyrA        | DNA gyrase subunit A                            |
| i02_2572       | c2774          | ubiG        | 3-demethylubiquinone-9 3-methyltransferase      |
| i02_2573       | c2775          | yfaL        | adhesin                                         |
| i02_2574       |                | /           | conserved domain protein                        |
| i02_2575       | c2776          | nrdA        | ribonucleotide-diphosphate reductase subunit    |
| i02_2576       | c2777          | nrdB        | ribonucleotide-diphosphate reductase subunit    |
| i02_2577       | c2778          | yfaE        | 2Fe-2S ferredoxin YfaE                          |
| i02_2578       | c2779          | inaA        | hypothetical protein                            |
| i02_2579       | c2780          | glpQ        | glycerophosphodiester phosphodiesterase         |
| i02_2580       | c2781          | glpT        | sn-glycerol-3-phosphate transporter             |
| i02_2581       | c2782          | glpA        | sn-glycerol-3-phosphate dehydrogenase subunit A |
| i02_2582       | c2783          | glpB        | anaerobic glycerol-3-phosphate dehydrogenase    |
| i02_2583       | c2784          | glpC        | sn-glycerol-3-phosphate dehydrogenase subunit C |
| i02_2584       | c2785          | /           | hypothetical protein                            |
| i02_2585       | c2786          | yfaD        | hypothetical protein                            |
| i02_2586       | c2787          | yfaU        | putative aldolase                               |
| i02_2587       | c2788          | yfaV        | putative transport protein YfaV                 |
| i02_2588       | c2789          | yfaW        | hypothetical protein                            |
| i02_2589       | c2790          | yfaX        | putative transcriptional regulator YfaX         |
| i02_2590       | c2791          | /           | competence damage-inducible protein A           |
| i02_2591       | c2792          | yfaZ        | hypothetical protein                            |
| i02_2592       | c2793          | yfaO        | putative Nudix hydrolase yfaO                   |
| i02_2593       | c2794          | ais         | Ais protein                                     |
| i02_2594       | c2795          | yfbE        | UDP-L-Ara4O C-4 transaminase                    |
| i02_2595       | c2796          | /           | undecaprenyl phosphate                          |
| i02_2596       | c2797          | yfbG        | bifunctional UDP-glucuronic acid                |
| i02_2597       | c2798          | yfbH        | hypothetical protein                            |
| i02_2598       | c2799          | arnT        | 4-amino-4-deoxy-L-arabinose transferase         |
| i02_2599       | c2800          | /           | hypothetical protein                            |
| i02_2600       | c2801          | yfbJ        | hypothetical protein                            |
| i02_2601       | c2802          | pmrD        | polymyxin B resistance protein pmrD             |
| i02_2602       | c2803          | menE        | O-succinylbenzoic acid--CoA ligase              |
| i02_2603       | c2804          | menC        | O-succinylbenzoate synthase                     |
| i02_2605       | c2806          | /           | hypothetical protein                            |
| i02_2604       | c2805          | menB        | naphthoate synthase                             |
| i02_2606       | c2807          | yfbB        | acyl-CoA thioester hydrolase YfbB               |
| i02_2607       | c2808          | menD        | 2-hydroxyglutarate synthase                     |
| i02_2608       | c2809          | menF        | menaquinone-specific isochorismate synthase     |
| i02_2609       | c2810          | elaB        | hypothetical protein                            |
| i02_2610       | c2811          | elaA        | hypothetical protein                            |
| i02_2611       | c2812          | elaC        | ribonuclease Z                                  |
| i02_2612       | c2813          | yfbK        | hypothetical protein                            |
|                | c2814          | /           | hypothetical protein                            |
| i02_2613       | c2815          | yfbL        | hypothetical protein                            |
| i02_2614       | c2816          | yfbM        | hypothetical protein                            |



| <b>Clone D</b> | <b>CFT 073</b> | <b>Gene</b> | <b>Product</b>                                  |
|----------------|----------------|-------------|-------------------------------------------------|
| i02_2615       | c2817          | nuoN        | NADH dehydrogenase subunit N                    |
| i02_2616       | c2818          | nuoM        | NADH dehydrogenase subunit M                    |
| i02_2617       | c2819          | nuoL        | NADH dehydrogenase subunit L                    |
| i02_2618       | c2820          | nuoK        | NADH dehydrogenase subunit K                    |
| i02_2619       | c2821          | nuoJ        | NADH dehydrogenase subunit J                    |
| i02_2620       | c2822          | nuoI        | NADH dehydrogenase subunit I                    |
| i02_2621       | c2823          | nuoH        | NADH dehydrogenase subunit H                    |
| i02_2622       | c2824          | nuoG        | NADH dehydrogenase subunit G                    |
| i02_2623       | c2825          | nuoF        | NADH dehydrogenase I subunit F                  |
| i02_2624       | c2826          | nuoE        | NADH dehydrogenase subunit E                    |
| i02_2625       | c2827          | nuoC        | bifunctional NADH:ubiquinone oxidoreductase     |
| i02_2626       | c2828          | nuoB        | NADH dehydrogenase subunit B                    |
| i02_2627       | c2829          | nuoA        | NADH dehydrogenase subunit A                    |
| i02_2628       |                | /           | hypothetical protein                            |
| i02_2629       | c2830          | IrhA        | transcriptional regulator IrhA                  |
| i02_2630       | c2831          | /           | aminotransferase AlaT                           |
| i02_2631       | c2832          | yfbR        | hypothetical protein                            |
| i02_2632       | c2833          | yfbS        | hypothetical protein                            |
| i02_2633       | c2834          | yfbT        | putative phosphatase                            |
| i02_2634       | c2835          | /           | hypothetical protein                            |
| i02_2635       | c2836          | yfbV        | hypothetical protein                            |
| i02_2636       | c2837          | /           | hypothetical protein                            |
| i02_2637       | c2838          | ackA        | acetate kinase                                  |
|                | c2839          | /           | hypothetical protein                            |
| i02_2638       | c2840          | pta         | phosphate acetyltransferase                     |
| i02_2639       | c2841          | yfcC        | hypothetical protein                            |
| i02_2640       | c2842          | yfcD        | hypothetical protein                            |
| i02_2641       | c2843          | yfcE        | phosphodiesterase                               |
| i02_2642       | c2844          | yfcF        | GST-like protein yfcF                           |
| i02_2643       | c2845          | yfcG        | glutathione S-transferase                       |
| i02_2644       | c2846          | folX        | D-erythro-7,8-dihydroneopterin triphosphate     |
| i02_2645       | c2847          | yfcH        | hypothetical protein                            |
| i02_2646       | c2848          | hisP        | histidine/lysine/arginine/ornithine transporter |
| i02_2647       | c2849          | hisM        | histidine transport system permease protein     |
| i02_2648       | c2850          | hisQ        | histidine transport system permease protein     |
| i02_2649       | c2851          | hisJ        | histidine-binding periplasmic protein precursor |
| i02_2650       |                | hisJ        | histidine-binding periplasmic protein precursor |
| i02_2651       | c2854          | /           | hypothetical protein                            |
| i02_2652       | c2855          | ubiX        | 3-octaprenyl-4-hydroxybenzoate carboxy-lyase    |
| i02_2653       | c2856          | purF        | amidophosphoribosyltransferase                  |
| i02_2654       | c2857          | cvpA        | colicin V production protein                    |
| i02_2655       | c2858          | /           | hypothetical protein                            |
| i02_2656       | c2859          | dedD        | hypothetical protein                            |
| i02_2657       | c2860          | folC        | bifunctional folylpolyglutamate synthase        |
| i02_2658       | c2861          | accD        | acetyl-CoA carboxylase subunit beta             |
| i02_2659       | c2862          | dedA        | hypothetical protein                            |
| i02_2660       | c2863          | truA        | tRNA pseudouridine synthase A                   |
| i02_2662       |                | /           | hypothetical protein                            |
| i02_2661       | c2864          | usg         | putative semialdehyde dehydrogenase             |
| i02_2663       | c2865          | pdxB        | erythronate-4-phosphate dehydrogenase           |
| i02_2664       | c2866          | flk         | flagella biosynthesis regulator                 |
| i02_2665       |                | yfcJ        | hypothetical protein                            |

| <b>Clone D</b> | <b>CFT 073</b> | <b>Gene</b> | <b>Product</b>                                   |
|----------------|----------------|-------------|--------------------------------------------------|
| i02_2666       | c2869          | fabB        | 3-oxoacyl-(acyl carrier protein) synthase I      |
| i02_2667       | c2870          | mnmC        | 5-methylaminomethyl-2-thiouridine                |
| i02_2668       | c2871          | yfcL        | hypothetical protein                             |
| i02_2669       | c2872          | yfcM        | hypothetical protein                             |
| i02_2670       | c2873          | yfcA        | hypothetical protein                             |
| i02_2671       | c2874          | mepA        | penicillin-insensitive murein endopeptidase      |
| i02_2672       | c2875          | aroC        | chorismate synthase                              |
| i02_2674       | c2877          | yfcN        | hypothetical protein                             |
| i02_2673       | c2876          | yfcB        | N5-glutamine S-adenosyl-L-methionine-dependent   |
| i02_2675       | c2878          | yfcO        | hypothetical protein                             |
| i02_2676       | c2879          | yfcP        | fimbrial-like protein yfcP precursor             |
| i02_2677       | c2880          | yfcQ        | fimbrial-like protein yfcQ precursor             |
| i02_2678       | c2881          | yfcR        | hypothetical protein                             |
| i02_2679       | c2882          | yfcS        | fimbrial chaperone yfcS precursor                |
| i02_2680       | c2883          | yfcU        | hypothetical protein                             |
| i02_2681       | c2884          | yfcV        | fimbrial-like protein yfcV precursor             |
| i02_2682       | c2885          | /           | phosphohistidine phosphatase                     |
| i02_2683       | c2886          | fadJ        | multifunctional fatty acid oxidation complex     |
| i02_2684       | c2887          | fadI        | 3-ketoacyl-CoA thiolase                          |
| i02_2685       | c2888          | yfcZ        | hypothetical protein                             |
| i02_2686       |                | /           | hypothetical protein                             |
| i02_2687       | c2889          | fadL        | long-chain fatty acid outer membrane             |
| i02_2688       | c2890          | vacJ        | VacJ lipoprotein precursor                       |
| i02_2689       | c2891          | /           | hypothetical protein                             |
| i02_2690       | c2892          | yfdC        | hypothetical protein                             |
| i02_2691       | c2893          | /           | hypothetical protein                             |
| i02_2693       | c2894          | ydeU        | hypothetical protein                             |
| i02_2693       | c2895          | /           | yapH-like protein                                |
| i02_2694       | c2896          | /           | hypothetical protein                             |
| i02_2695       | c2897          | /           | Type 1 fimbriae regulatory protein fimB          |
| i02_2696       | c2898          | /           | Type 1 fimbriae regulatory protein fimB          |
| i02_2697       | c2899          | dsdC        | DNA-binding transcriptional regulator DsdC       |
| i02_2698       | c2900          | dsdX        | permease DsdX                                    |
| i02_2699       | c2901          | dsdA        | D-serine dehydratase                             |
| i02_2701       | c2903          | /           | hypothetical protein                             |
| i02_2700       | c2902          | emrY        | multidrug resistance protein Y                   |
| i02_2702       | c2904          | emrK        | multidrug resistance protein K                   |
| i02_2703       | c2905          | evgA        | DNA-binding transcriptional activator EvgA       |
| i02_2704       | c2906          | evgS        | hybrid sensory histidine kinase in two-component |
| i02_2705       | c2907          | yfdE        | hypothetical protein                             |
| i02_2706       | c2908          | yfdV        | putative transporter YfdV                        |
| i02_2707       | c2909          | /           | putative oxalyl-CoA decarboxylase                |
| i02_2708       | c2910          | yfdW        | formyl-coenzyme A transferase                    |
| i02_2709       | c2911          | /           | hypothetical protein                             |
| i02_2710       | c2912          | ypdI        | lipoprotein ypdI precursor                       |
|                | c2913          | /           | hypothetical protein                             |
| i02_2711       | c2914          | yfdY        | hypothetical protein                             |
| i02_2712       | c2915          | ddg         | lipid A biosynthesis protein                     |
| i02_2713       | c2916          | yfdZ        | aminotransferase                                 |
| i02_2715       | c2918          | /           | hypothetical protein                             |
| i02_2716       | c2919          | ypdA        | hypothetical protein                             |

| <b>Clone D</b> | <b>CFT 073</b> | <b>Gene</b> | <b>Product</b>                                 |
|----------------|----------------|-------------|------------------------------------------------|
| i02_2717       | c2920          | ypdB        | hypothetical protein                           |
| i02_2718       | c2921          | ypdC        | putative transcriptional regulator YpdC        |
| i02_2719       | c2922          | /           | putative phosphoenolpyruvate-protein           |
| i02_2720       | c2923          | ypdE        | exoaminopeptidase                              |
| i02_2721       | c2924          | /           | aminopeptidase                                 |
| i02_2722       | c2925          | /           | putative PTS system IIC component ypdG         |
| i02_2723       | c2926          | /           | putative PTS system IIB component ypdH         |
| i02_2724       | c2927          | glk         | glucokinase                                    |
| i02_2725       | c2928          | yfeO        | hypothetical protein                           |
| i02_2726       | c2929          | ypeC        | hypothetical protein                           |
| i02_2727       | c2931          | /           | manganese transport protein MntH               |
| i02_2728       | c2932          | nupC        | nucleoside permease nupC                       |
| i02_2729       | c2933          | yfeA        | hypothetical protein                           |
| i02_2730       | c2934          | yfeC        | hypothetical protein                           |
| i02_2731       | c2935          | yfeD        | hypothetical protein                           |
| i02_2732       | c2936          | gltX        | glutamyl-tRNA synthetase                       |
| i02_2733       |                | /           | hypothetical protein                           |
| i02_2734       | c2937          | xapR        | DNA-binding transcriptional activator XapR     |
| i02_2735       | c2938          | /           | hypothetical protein                           |
| i02_2736       | c2939          | xapB        | xanthosine permease                            |
| i02_2737       | c2940          | xapA        | purine nucleoside phosphorylase                |
| i02_2738       |                | /           | hypothetical protein                           |
| i02_2739       | c2941          | yfeN        | hypothetical protein                           |
| i02_2740       | c2942          | yfeR        | putative transcriptional regulator YfeR        |
| i02_2741       | c2943          | yfeH        | hypothetical protein                           |
| i02_2742       | c2944          | /           | hypothetical protein                           |
| i02_2743       | c2945          | ligA        | NAD-dependent DNA ligase LigA                  |
| i02_2744       | c2946          | zipA        | cell division protein ZipA                     |
| i02_2745       | c2947          | cysZ        | putative sulfate transport protein CysZ        |
| i02_2746       | c2948          | cysK        | cysteine synthase A                            |
| i02_2747       | c2949          | /           | hypothetical protein                           |
| i02_2748       | c2950          | ptsH        | phosphohistidinoprotein-hexose                 |
| i02_2749       | c2951          | ptsI        | phosphoenolpyruvate-protein phosphotransferase |
| i02_2750       | c2952          | crr         | glucose-specific PTS system component          |
| i02_2751       | c2953          | pdxK        | pyridoxal kinase                               |
| i02_2752       | c2954          | yfeK        | hypothetical protein                           |
| i02_2753       | c2955          | cysM        | cysteine synthase B                            |
| i02_2754       | c2956          | cysA        | sulfate/thiosulfate transporter subunit        |
| i02_2755       | c2957          | cysW        | sulfate/thiosulfate transporter permease       |
| i02_2756       | c2958          | cysU        | sulfate/thiosulfate transporter subunit        |
| i02_2757       | c2959          | cysP        | thiosulfate transporter subunit                |
| i02_2758       | c2960          | ucpA        | short chain dehydrogenase                      |
| i02_2759       | c2961          | murQ        | N-acetylmuramic acid-6-phosphate etherase      |
| i02_2760       | c2962          | murP        | N-acetylmuramic acid phosphotransfer permease  |
| i02_2761       | c2963          | /           | hypothetical protein                           |
| i02_2762       | c2964          | /           | hypothetical protein                           |
|                | c2965          | yfeX        | hypothetical protein                           |
| i02_2763       | c2966          | yfeY        | hypothetical protein                           |
| i02_2764       | c2967          | yfeZ        | hypothetical protein                           |
| i02_2765       | c2968          | ypeA        | putative acetyltransferase                     |
| i02_2766       | c2969          | amiA        | N-acetylmuramoyl-l-alanine amidase I           |
| i02_2767       | c2970          | hemF        | coproporphyrinogen III oxidase                 |

| <b>Clone D</b> | <b>CFT 073</b> | <b>Gene</b> | <b>Product</b>                                  |
|----------------|----------------|-------------|-------------------------------------------------|
| i02_2768       | c2971          | yfeG        | transcriptional regulator EutR                  |
| i02_2769       | c2972          | /           | ethanolamine utilization protein eutK precursor |
| i02_2770       | c2973          | /           | ethanolamine utilization protein eutL           |
| i02_2771       | c2974          | eutC        | ethanolamine ammonia-lyase small subunit        |
| i02_2772       | c2975          | eutB        | ethanolamine ammonia-lyase heavy chain          |
| i02_2773       | c2976          | eutA        | reactivating factor for ethanolamine ammonia    |
| i02_2774       | c2977          | eutH        | ethanolamine utilization protein eutH           |
| i02_2775       | c2978          | eutG        | ethanolamine utilization protein eutG           |
| i02_2776       | c2979          | eutJ        | ethanolamine utilization protein eutJ           |
| i02_2777       | c2980          | eutE        | ethanolamine utilization protein eutE           |
| i02_2778       | c2981          | cchB        | ethanolamine utilization protein eutN           |
| i02_2779       | c2982          | cchA        | ethanolamine utilization protein eutM precursor |
| i02_2780       | c2983          | eutD        | phosphotransacetylase                           |
| i02_2781       | c2984          | /           | ethanolamine utilization cobalamin              |
| i02_2782       | c2985          | /           | ethanolamine utilization protein EutQ           |
| i02_2783       | c2986          | /           | ethanolamine utilization protein eutP           |
| i02_2784       | c2987          | /           | ethanolamine utilization protein eutS           |
| i02_2785       | c2988          | /           | malic enzyme                                    |
| i02_2786       | c2989          | talA        | transaldolase A                                 |
| i02_2787       | c2990          | tktB        | transketolase                                   |
|                | c2992          | /           | hypothetical protein                            |
|                | c2993          | /           | hypothetical protein                            |
| i02_2788       | c2991          | ypfG        | hypothetical protein                            |
| i02_2789       | c2994          | yffH        | hypothetical protein                            |
| i02_2790       | c2995          | yffG        | putative oxidoreductase Fe-S binding subunit    |
| i02_2791       | c2996          | narQ        | nitrate/nitrite sensor protein NarQ             |
| i02_2792       | c2997          | acrD        | aminoglycoside/multidrug efflux system          |
| i02_2793       |                | /           | conserved hypothetical protein                  |
| i02_2794       | c2998          | yffB        | hypothetical protein                            |
| i02_2795       | c2999          | dapE        | succinyl-diaminopimelate desuccinylase          |
| i02_2796       | c3000          | /           | hypothetical protein                            |
| i02_2797       | c3001          | ypfH        | esterase YpfH                                   |
| i02_2798       | c3002          | ypfI        | hypothetical protein                            |
| i02_2799       | c3003          | ypfJ        | hypothetical protein                            |
| i02_2800       | c3004          | purC        | phosphoribosylaminoimidazole-succinocarboxamide |
| i02_2801       | c3005          | nlpB        | lipoprotein                                     |
| i02_2802       | c3006          | dapA        | dihydrodipicolinate synthase                    |
| i02_2803       | c3007          | gcvR        | predicted transcriptional regulator             |
| i02_2804       | c3008          | bcp         | thioredoxin-dependent thiol peroxidase          |
| i02_2805       | c3009          | perM        | putative permease PerM                          |
| i02_2806       | c3010          | /           | hypothetical protein                            |
| i02_2807       | c3011          | yfgC        | hypothetical protein                            |
| i02_2808       | c3012          | /           | hypothetical protein                            |
| i02_2809       | c3013          | yfgE        | DNA replication initiation factor               |
| i02_2810       | c3014          | uraA        | uracil transporter                              |
| i02_2812       | c3016          | /           | hypothetical protein                            |
| i02_2811       | c3015          | upp         | uracil phosphoribosyltransferase                |
| i02_2813       | c3017          | purM        | phosphoribosylaminoimidazole synthetase         |
| i02_2814       | c3018          | purN        | phosphoribosylglycinamide formyltransferase     |
| i02_2815       | c3019          | ppk         | polyphosphate kinase                            |
| i02_2816       | c3020          | ppx         | exopolyphosphatase                              |

| <b>Clone D</b> | <b>CFT 073</b> | <b>Gene</b> | <b>Product</b>                                  |
|----------------|----------------|-------------|-------------------------------------------------|
| i02_2817       | c3021          | yfgF        | hypothetical protein                            |
|                | c3022          | /           | hypothetical protein                            |
| i02_2819       | c3023          | /           | hypothetical protein                            |
| i02_2820       | c3024          | yfgH        | lipoprotein yfgH precursor                      |
| i02_2821       | c3025          | yfgI        | hypothetical protein                            |
| i02_2822       | c3026          | guaA        | GMP synthase                                    |
| i02_2823       | c3027          | guaB        | inosine 5'-monophosphate dehydrogenase          |
| i02_2824       | c3028          | xseA        | exodeoxyribonuclease VII large subunit          |
| i02_2825       | c3029          | /           | RatA-like protein                               |
| i02_2826       | c3030          | /           | SinI-like protein                               |
| i02_2827       | c3031          | /           | SinH-like protein                               |
| i02_2828       | c3032          | yfgJ        | hypothetical protein                            |
| i02_2829       | c3033          | engA        | GTP-binding protein EngA                        |
| i02_2830       | c3034          | yfgL        | outer membrane protein assembly complex subunit |
| i02_2831       | c3035          | yfgM        | hypothetical protein                            |
| i02_2832       | c3036          | hisS        | histidyl-tRNA synthetase                        |
| i02_2833       | c3037          | ispG        | 4-hydroxy-3-methylbut-2-en-1-yl diphosphate     |
| i02_2834       | c3038          | yfgA        | hypothetical protein                            |
| i02_2835       | c3039          | yfgB        | hypothetical protein                            |
|                | c3040          | /           | hypothetical protein                            |
| i02_2836       | c3041          | ndk         | nucleoside diphosphate kinase                   |
| i02_2837       | c3042          | pbpC        | penicillin-binding protein 1C                   |
| i02_2838       | c3043          | yfhM        | lipoprotein yfhM precursor                      |
| i02_2839       | c3044          | sseA        | 3-mercaptopyruvate sulfurtransferase            |
| i02_2840       | c3045          | /           | hypothetical protein                            |
| i02_2841       | c3046          | /           | hypothetical protein                            |
| i02_2842       | c3047          | sseB        | enhanced serine sensitivity protein SseB        |
| i02_2843       | c3048          | pepB        | aminopeptidase B                                |
| i02_2844       | c3049          | yfhJ        | hypothetical protein                            |
| i02_2845       | c3050          | fdx         | ferredoxin, 2Fe-2S                              |
| i02_2846       | c3051          | hscA        | chaperone protein HscA                          |
| i02_2847       | c3052          | hscB        | co-chaperone HscB                               |
| i02_2848       |                | /           | hypothetical protein                            |
|                | c3054          | /           | hypothetical protein                            |
| i02_2849       | c3053          | iscA        | iron-sulfur cluster assembly protein            |
| i02_2850       | c3055          | /           | scaffold protein                                |
| i02_2851       | c3056          | yfhO        | cysteine desulfurase                            |
| i02_2852       | c3057          | yfhP        | DNA-binding transcriptional regulator IscR      |
| i02_2853       | c3058          | yfhQ        | putative tRNA/rRNA methyltransferase YfhQ       |
| i02_2854       | c3059          | suhB        | inositol monophosphatase                        |
| i02_2855       | c3060          | yfhR        | hypothetical protein                            |
| i02_2856       | c3061          | csiE        | stationary phase inducible protein CsiE         |
| i02_2857       | c3062          | hcaT        | putative 3-phenylpropionic acid transporter     |
| i02_2858       | c3063          | /           | hypothetical protein                            |
| i02_2859       | c3064          | /           | hypothetical protein                            |
| i02_2860       | c3065          | yphA        | hypothetical protein                            |
| i02_2861       | c3066          | yphB        | hypothetical protein                            |
| i02_2862       | c3067          | yphC        | hypothetical protein                            |
| i02_2863       | c3068          | yphD        | ABC transporter permease                        |
| i02_2864       | c3069          | yphE        | ABC transporter ATP-binding protein             |
| i02_2865       | c3070          | yphF        | ABC transporter periplasmic-binding protein     |

| <b>Clone D</b> | <b>CFT 073</b> | <b>Gene</b> | <b>Product</b>                                  |
|----------------|----------------|-------------|-------------------------------------------------|
| i02_2866       | c3071          | yphG        | hypothetical protein                            |
| i02_2867       | c3072          | yphH        | hypothetical protein                            |
| i02_2868       | c3073          | glyA        | serine hydroxymethyltransferase                 |
| i02_2869       |                | /           | hypothetical protein                            |
| i02_2870       | c3075          | hmpA        | nitric oxide dioxygenase                        |
| i02_2871       | c3076          | glnB        | nitrogen regulatory protein P-II 1              |
| i02_2872       | c3077          | yfhA        | hypothetical protein                            |
| i02_2873       | c3078          | yfhG        | hypothetical protein                            |
| i02_2874       | c3079          | yfhK        | putative sensor-like histidine kinase yfhK      |
| i02_2875       | c3080          | purL        | phosphoribosylformylglycinamide synthase        |
| i02_2876       | c3081          | yfhD        | putative transglycosylase                       |
| i02_2877       | c3082          | yfhC        | tRNA-specific adenosine deaminase               |
| i02_2878       | c3083          | yfhB        | hypothetical protein                            |
| i02_2879       | c3084          | /           | hypothetical protein                            |
| i02_2880       | c3085          | yfhH        | putative DNA-binding transcriptional regulator  |
| i02_2881       | c3086          | yfhL        | putative ferredoxin-like protein yfhL           |
| i02_2882       | c3087          | acpS        | 4'-phosphopantetheinyl transferase              |
| i02_2883       | c3088          | pdxJ        | pyridoxine 5'-phosphate synthase                |
| i02_2884       | c3089          | recO        | DNA repair protein RecO                         |
| i02_2885       | c3090          | era         | GTP-binding protein Era                         |
| i02_2886       | c3091          | rnc         | ribonuclease III                                |
| i02_2887       | c3092          | lepB        | signal peptidase I                              |
| i02_2888       | c3093          | lepA        | GTP-binding protein LepA                        |
| i02_2889       | c3094          | rseC        | SoxR reducing system protein RseC               |
| i02_2890       | c3095          | rseB        | periplasmic negative regulator of sigmaE        |
| i02_2891       | c3096          | rseA        | anti-RNA polymerase sigma factor SigE           |
| i02_2892       | c3097          | rpoE        | RNA polymerase sigma factor RpoE                |
| i02_2893       | c3098          | nadB        | L-aspartate oxidase                             |
| i02_2894       | c3099          | yfiC        | hypothetical protein                            |
| i02_2895       | c3100          | srnB        | ATP-dependent RNA helicase SrmB                 |
| i02_2896       | c3101          | yfiE        | putative transcriptional regulator YfiE         |
| i02_2897       | c3102          | yfiK        | neutral amino-acid efflux protein               |
| i02_2899       | c3104          | /           | hypothetical protein                            |
| i02_2898       | c3103          | yfiD        | autonomous glycyl radical cofactor GrcA         |
| i02_2900       | c3105          | ung         | uracil-DNA glycosylase                          |
| i02_2902       |                | yfiF        | rRNA methyltransferase YfiF                     |
| i02_2901       | c3106          | yfiF        | putative methyltransferase                      |
| i02_2903       | c3107          | trxC        | thioredoxin 2                                   |
| i02_2904       | c3108          | yfiP        | hypothetical protein                            |
| i02_2905       | c3109          | yfiQ        | hypothetical protein                            |
| i02_2906       | c3110          | pssA        | phosphatidylserine synthase                     |
| i02_2907       | c3111          | yfiM        | hypothetical protein                            |
| i02_2908       | c3112          | kgtP        | alpha-ketoglutarate transporter                 |
| i02_2910       | c3113          | /           | hypothetical protein                            |
| i02_2911       | c3114          | clpB        | protein disaggregation chaperone                |
| i02_2912       | c3115          | yfiH        | hypothetical protein                            |
| i02_2913       | c3116          | rluD        | 23S rRNA pseudouridine synthase D               |
| i02_2914       | c3117          | yfiO        | outer membrane protein assembly complex subunit |
|                | c3118          | /           | hypothetical protein                            |
| i02_2915       | c3119          | yfiA        | translation inhibitor protein RaiA              |
|                | c5497          | pheL        | Phe leader peptide                              |

| <b>Clone D</b> | <b>CFT 073</b> | <b>Gene</b> | <b>Product</b>                                 |
|----------------|----------------|-------------|------------------------------------------------|
| i02_2916       | c3120          | pheA        | bifunctional chorismate mutase/prephenate      |
| i02_2917       | c3121          | tyrA        | bifunctional chorismate mutase/prephenate      |
| i02_2918       | c3122          | aroF        | phospho-2-dehydro-3-deoxyheptonate aldolase    |
| i02_2919       | c3123          | yfiL        | hypothetical protein                           |
| i02_2920       | c3124          | yfiR        | hypothetical protein                           |
| i02_2921       | c3125          | yfiN        | hypothetical protein                           |
| i02_2922       | c3126          | yfiB        | putative outer membrane lipoprotein            |
| i02_2923       | c3127          | rplS        | 50S ribosomal protein L19                      |
| i02_2924       | c3128          | trmD        | tRNA (guanine-N(1)-)-methyltransferase         |
| i02_2925       | c3129          | rimM        | 16S rRNA-processing protein RimM               |
| i02_2926       | c3130          | rpsP        | 30S ribosomal protein S16                      |
| i02_2927       | c3131          | ffh         | signal recognition particle protein            |
| i02_2928       | c3132          | ypjD        | hypothetical protein                           |
| i02_2929       | c3133          | /           | hypothetical protein                           |
|                | c3134          | /           | hypothetical protein                           |
| i02_2930       | c3135          | grpE        | heat shock protein GrpE                        |
| i02_2932       | c3137          | ppnK        | inorganic polyphosphate/ATP-NAD kinase         |
| i02_2931       | c3136          | /           | hypothetical protein                           |
| i02_2933       | c3138          | recN        | recombination and repair protein               |
| i02_2934       | c3139          | /           | hypothetical protein                           |
| i02_2935       | c3140          | /           | hypothetical protein                           |
| i02_2936       | c3141          | yfiG        | hypothetical protein                           |
| i02_2937       | c3142          | smpB        | SsrA-binding protein                           |
| -              | c3143          | /           | hypothetical protein                           |
| -              | c3144          | /           | DNA-damage-inducible protein I                 |
| -              | c3145          | ydfK        | hypothetical protein                           |
| -              | c3146          | /           | putative DNA-invertase from lambdoid prophage  |
| -              | c3147          | /           | hypothetical protein                           |
| -              | c3148          | /           | hypothetical protein                           |
| -              | c3149          | /           | hypothetical protein                           |
| -              | c3150          | /           | hypothetical protein                           |
| -              | c3151          | /           | hypothetical protein                           |
| -              | c3152          | /           | hypothetical protein                           |
| -              | c3153          | /           | putative outer membrane protein of prophage    |
| -              | c3154          | /           | putative tail component of prophage            |
| -              | c3155          | /           | putative tail component of prophage            |
| -              | c3156          | /           | putative tail fiber component K of prophage    |
| -              | c3157          | /           | hypothetical protein                           |
| -              | c3158          | /           | putative tail component of prophage            |
| -              | c3159          | /           | putative tail component of prophage            |
| -              | c3160          | /           | putative tail component of prophage            |
| -              | c3161          | /           | putative tail component of prophage            |
| -              | c3162          | /           | putative tail component of prophage            |
| -              | c3163          | /           | putative tail component of prophage            |
| -              | c3164          | /           | putative tail component of prophage            |
| -              | c3165          | /           | putative tail fiber component Z of prophage    |
| -              | c3166          | /           | putative head-tail joining protein of prophage |
| -              | c3167          | /           | putative DNA packaging protein of prophage     |
| -              | c3168          | /           | putative capsid protein of prophage            |
| -              | c3169          | /           | putative head-DNA stabilization protein        |
| -              | c3170          | /           | putative capsid protein of prophage            |
| -              | c3171          | /           | putative capsid structural protein of prophage |

| <b>Clone D</b> | <b>CFT 073</b> | <b>Gene</b> | <b>Product</b>                                  |
|----------------|----------------|-------------|-------------------------------------------------|
| -              | c3172          | /           | putative head-tail joining protein of prophage  |
| -              | c3173          | /           | putative DNA packaging protein of prophage      |
| -              | c3174          | nohB        | prophage qsr' DNA packaging protein NU1-like    |
| -              | c3175          | /           | hypothetical protein                            |
| -              | c3176          | /           | GnsB protein                                    |
| -              | c3177          | cspl        | cold shock-like protein cspl                    |
| -              | c3178          | /           | hypothetical protein                            |
| -              | c3179          | ydfP        | hypothetical protein                            |
| -              | c3180          | /           | lysozyme from lambdoid prophage Qin             |
| -              | c3181          | /           | hypothetical protein                            |
| -              | c3182          | /           | lambdoid prophage Qin lysis protein S           |
| -              | c3183          | /           | hypothetical protein                            |
| -              | c3184          | cspB        | cold shock-like protein cspB                    |
| -              | c3185          | cspF        | cold shock-like protein cspF                    |
| -              | c3186          | /           | lambdoid prophage Qin antitermination protein Q |
| -              | c3187          | /           | hypothetical protein                            |
| -              | c3188          | /           | hypothetical protein                            |
| -              | c3189          | /           | hypothetical protein                            |
| -              | c3190          | /           | hypothetical protein                            |
| -              | c3191          | yfdN        | hypothetical protein                            |
| -              | c3192          | /           | hypothetical protein                            |
| -              | c3193          | /           | hypothetical protein                            |
| -              | c3194          | /           | hypothetical protein                            |
| -              | c3195          | ymfL        | hypothetical protein                            |
| -              | c3196          | /           | hypothetical protein                            |
| -              | c3197          | /           | putative repressor protein of prophage          |
| -              | c3198          | /           | hypothetical protein                            |
| -              | c3199          | /           | hypothetical protein                            |
| -              | c3200          | /           | hypothetical protein                            |
| -              | c3201          | yfdQ        | hypothetical protein                            |
| -              | c3202          | yfdR        | hypothetical protein                            |
| -              | c3203          | /           | hypothetical protein                            |
| -              | c3204          | /           | hypothetical protein                            |
| -              | c3205          | /           | hypothetical protein                            |
| -              | c3206          | /           | hypothetical protein                            |
| i02_2938       | c3207          | ygaT        | hypothetical protein                            |
| i02_2939       | c3208          | ygaF        | hydroxyglutarate oxidase                        |
| i02_2940       | c3209          | gabD        | succinate-semialdehyde dehydrogenase I          |
| i02_2941       | c3210          | gabT        | 4-aminobutyrate aminotransferase                |
| i02_2942       | c3211          | gabP        | gamma-aminobutyrate transporter                 |
| i02_2943       | c3212          | ygaE        | DNA-binding transcriptional regulator CsiR      |
| i02_2944       | c3213          | ygaU        | LysM domain/BON superfamily protein             |
| i02_2945       | c3214          | /           | hypothetical protein                            |
|                | c3215          | yqaE        | hypothetical protein                            |
| i02_2946       | c3216          | ygaV        | putative transcriptional regulator YgaV         |
| i02_2947       | c3217          | ygaP        | hypothetical protein                            |
| i02_2948       | c3218          | stpA        | DNA binding protein, nucleoid-associated        |
| i02_2949       | c3219          | /           | hypothetical protein                            |
| i02_2950       | c3220          | /           | hypothetical protein                            |
| i02_2951       | c3221          | ygaW        | hypothetical protein                            |
| i02_2952       | c3222          | ygaC        | hypothetical protein                            |
| i02_2953       | c3223          | ygaM        | hypothetical protein                            |



| <b>Clone D</b> | <b>CFT 073</b> | <b>Gene</b> | <b>Product</b>                                   |
|----------------|----------------|-------------|--------------------------------------------------|
| i02_2954       | c3224          | /           | hypothetical protein                             |
| i02_2955       | c3225          | /           | hypothetical protein                             |
| i02_2956       | c3226          | nrdH        | glutaredoxin-like protein                        |
| i02_2957       | c3227          | nrdI        | ribonucleotide reductase stimulatory protein     |
| i02_2958       | c3228          | nrdE        | ribonucleotide-diphosphate reductase subunit     |
| i02_2959       | c3229          | nrdF        | ribonucleotide-diphosphate reductase subunit     |
| i02_2960       | c3230          | proV        | glycine betaine transporter ATP-binding subunit  |
| i02_2961       | c3231          | proW        | glycine betaine transporter membrane protein     |
| i02_2962       | c3232          | proX        | glycine betaine transporter periplasmic subunit  |
| i02_2963       | c3233          | /           | hypothetical protein                             |
| i02_2964       | c3234          | /           | putative transport protein                       |
| i02_2965       | c3235          | ygaZ        | hypothetical protein                             |
| i02_2966       | c3236          | ygaH        | hypothetical protein                             |
| i02_2967       | c3237          | emrR        | transcriptional repressor MprA                   |
| i02_2968       | c3238          | emrA        | multidrug resistance protein A                   |
| i02_2969       | c3239          | emrB        | multidrug resistance protein B                   |
| i02_2970       | c3240          | /           | hypothetical protein                             |
|                | c3241          | /           | hypothetical protein                             |
| i02_2972       | c3242          | /           | hypothetical protein                             |
| i02_2973       | c3243          | /           | hypothetical protein                             |
| i02_2974       | c3244          | ygaG        | S-ribosylhomocysteinase                          |
| i02_2975       | c3245          | gshA        | glutamate--cysteine ligase                       |
| i02_2976       | c3246          | yqaA        | hypothetical protein                             |
| i02_2977       | c3247          | yqaB        | fructose-1-phosphatase                           |
| i02_2978       | c3248          | /           | hypothetical protein                             |
| i02_2979       | c3249          | csrA        | carbon storage regulator                         |
| i02_2980       |                | /           | hypothetical protein                             |
| i02_2982       | c3251          | /           | hypothetical protein                             |
| i02_2981       |                | alaS        | alanyl-tRNA synthetase                           |
| i02_2983       | c3252          | recX        | recombination regulator RecX                     |
| i02_2984       | c3253          | recA        | recombinase A                                    |
| i02_2985       | c3254          | ygaD        | competence damage-inducible protein A            |
| i02_2986       | c3255          | mltB        | murein hydrolase B                               |
| i02_2987       | c3256          | srIA        | PTS system, glucitol/sorbitol-specific IIC2      |
| i02_2988       | c3257          | srIE        | PTS system, glucitol/sorbitol-specific IIBC      |
| i02_2989       | c3258          | srIB        | glucitol/sorbitol-specific PTS system component  |
| i02_2990       | c3259          | srID        | sorbitol-6-phosphate dehydrogenase               |
| i02_2991       | c3260          | gutM        | DNA-binding transcriptional activator GutM       |
| i02_2992       | c3261          | srIR        | DNA-binding transcriptional repressor SrIR       |
| i02_2993       | c3262          | gutQ        | D-arabinose 5-phosphate isomerase                |
| i02_2994       | c3263          | ygaA        | anaerobic nitric oxide reductase transcription   |
| i02_2995       |                | norV        | anaerobic nitric oxide reductase flavorubredoxin |
|                | c3264          | /           | hypothetical protein                             |
| i02_2997       | c3267          | ygbD        | nitric oxide reductase                           |
| i02_2998       | c3268          | hypF        | hydrogenase maturation protein hypF              |
| i02_2999       | c3269          | hydN        | electron transport protein HydN                  |
| i02_3000       | c3270          | /           | hypothetical protein                             |
| i02_3001       | c3271          | /           | hypothetical protein                             |
| i02_3002       | c3272          | /           | hypothetical protein                             |
| i02_3003       | c3273          | /           | hypothetical protein                             |
|                | c3275          | /           | hypothetical protein                             |
| i02_3004       | c3274          | /           | hypothetical protein                             |

| <b>Clone D</b> | <b>CFT 073</b> | <b>Gene</b> | <b>Product</b>                                                |
|----------------|----------------|-------------|---------------------------------------------------------------|
| i02_3005       | c3276          | /           | hypothetical protein                                          |
| i02_3006       | c3277          | hycl        | hydrogenase 3 maturation protease                             |
| i02_3007       | c3278          | hycH        | formate hydrogenlyase maturation protein hycH                 |
| i02_3008       | c3279          | hycG        | formate hydrogenlyase subunit 7                               |
| i02_3009       | c3280          | hycF        | formate hydrogenlyase complex iron-sulfur                     |
| i02_3010       | c3281          | hycE        | formate hydrogenlyase subunit 5 precursor                     |
| i02_3011       | c3282          | hycD        | formate hydrogenlyase subunit 4                               |
| i02_3012       | c3283          | hycC        | formate hydrogenlyase subunit 3                               |
| i02_3013       | c3284          | hycB        | formate hydrogenlyase subunit 2                               |
| i02_3014       | c3285          | hycA        | formate hydrogenlyase regulatory protein HycA                 |
| i02_3015       | c3286          | hypA        | hydrogenase nickel incorporation protein                      |
| i02_3016       | c3287          | hypB        | hydrogenase nickel incorporation protein HypB                 |
| i02_3017       | c3288          | hypC        | hydrogenase assembly chaperone                                |
| i02_3018       | c3289          | hypD        | hydrogenase isoenzyme formation protein hypD                  |
| i02_3019       | c3290          | hypE        | hydrogenase isoenzyme formation protein hypE                  |
| i02_3020       | c3291          | fhIA        | formate hydrogenlyase transcriptional activator               |
| i02_3021       | c3292          | /           | molybdenum-pterin-binding-protein                             |
| i02_3022       | c3293          | ygbA        | hypothetical protein                                          |
| i02_3023       | c3294          | mutS        | DNA mismatch repair protein MutS                              |
| i02_3024       | c3295          | pphB        | serine/threonine-specific protein phosphatase 2               |
| i02_3025       | c3296          | ygbI        | putative transcriptional regulator YgbI                       |
| i02_3026       | c3297          | ygbJ        | oxidoreductase ygbJ                                           |
| i02_3027       | c3298          | ygbK        | hypothetical protein                                          |
| i02_3028       | c3299          | ygbL        | putative aldolase                                             |
| i02_3029       | c3300          | ygbM        | hypothetical protein                                          |
| i02_3030       | c3301          | ygbN        | inner membrane permease YgbN                                  |
| i02_3031       | c3302          | /           | hypothetical protein                                          |
| i02_3032       | c3303          | /           | hypothetical protein                                          |
| i02_3033       | c3304          | /           | hypothetical protein                                          |
|                | c3305          | /           | hypothetical protein                                          |
|                | c3305          | /           | hypothetical protein                                          |
| i02_3034       | c3306          | /           | hypothetical protein                                          |
| i02_3034       | c3307          | /           | hypothetical protein                                          |
| i02_3036       | c3309          | /           | hypothetical protein                                          |
| i02_3035       | c3308          | nlpD        | lipoprotein NlpD                                              |
| i02_3037       | c3310          | pcm         | protein-L-isoaspartate O-methyltransferase                    |
| i02_3038       | c3311          | surE        | stationary phase survival protein SurE                        |
| i02_3039       | c3312          | truD        | tRNA pseudouridine synthase D                                 |
| i02_3040       | c3313          | ispF        | 2-C-methyl-D-erythritol 2,4-cyclodiphosphate synthase monomer |
| i02_3041       | c3314          | ispD        | 4-diphosphocytidyl-2C-methyl-D-erythritol synthetase monomer  |
| i02_3042       | c3315          | ftsB        | cell division protein FtsB                                    |
| i02_3043       | c3316          | ygbE        | hypothetical protein                                          |
| i02_3044       | c3317          | cysC        | adenylsulfate kinase                                          |
| i02_3045       | c3318          | cysN        | sulfate adenyltransferase subunit 1                           |
| i02_3046       | c3319          | cysD        | sulfate adenyltransferase subunit 2                           |
| i02_3047       | c3320          | iap         | alkaline phosphatase isozyme conversion                       |
| i02_3048       | c3321          | cysH        | phosphoadenosine phosphosulfate reductase                     |
| i02_3049       | c3322          | cysI        | sulfite reductase subunit beta                                |
| i02_3050       | c3323          | cysJ        | sulfite reductase subunit alpha                               |
| i02_3051       | c3324          | ygcM        | putative 6-pyruvoyl tetrahydrobiopterin                       |

| <b>Clone D</b> | <b>CFT 073</b> | <b>Gene</b> | <b>Product</b>                                  |
|----------------|----------------|-------------|-------------------------------------------------|
| i02_3052       | c3325          | ygcN        | electron transfer flavoprotein-quinone          |
| i02_3053       | c3326          | ygcO        | ferredoxin-like protein ygcO                    |
| i02_3054       |                | /           | putative anti-terminator regulatory protein     |
| i02_3055       | c3328          | ygcQ        | putative electron transfer flavoprotein subunit |
| i02_3056       | c3329          | ygcR        | putative electron transfer flavoprotein subunit |
| i02_3057       | c3330          | ygcS        | metabolite transport protein                    |
| i02_3058       | c3331          | /           | hypothetical protein                            |
| i02_3059       | c3332          | ygcW        | oxidoreductase ygcW                             |
| i02_3060       | c3333          | yqcE        | hypothetical protein                            |
| i02_3061       | c3334          | ygcE        | putative sugar kinase ygcE                      |
| i02_3062       | c3335          | ygcF        | hypothetical protein                            |
| i02_3063       | c3336          | /           | hypothetical protein                            |
| i02_3064       | c3337          | /           | hypothetical protein                            |
| i02_3065       | c3338          | /           | hypothetical protein                            |
|                | c3339          | /           | hypothetical protein                            |
| i02_3067       | c3340          | /           | hypothetical protein                            |
| i02_3068       | c3342          | ygcG        | hypothetical protein                            |
|                | c3343          | /           | hypothetical protein                            |
| i02_3069       | c3344          | eno         | phosphopyruvate hydratase                       |
| i02_3070       | c3345          | pyrG        | CTP synthetase                                  |
| i02_3071       | c3346          | mazG        | nucleoside triphosphate pyrophosphohydrolase    |
| i02_3072       | c3347          | relA        | GDP/GTP pyrophosphokinase                       |
| i02_3073       | c3348          | rumA        | 23S rRNA 5-methyluridine methyltransferase      |
| i02_3074       | c3349          | barA        | hybrid sensory histidine kinase BarA            |
| i02_3075       |                | /           | hypothetical protein                            |
| i02_3076       | c3350          | ygcX        | glucarate dehydratase                           |
| i02_3077       | c3352          | ygcY        | glucarate dehydratase related protein           |
| i02_3078       | c3353          | /           | glucarate transporter                           |
| i02_3080       | c3355          | /           | hypothetical protein                            |
| i02_3079       | c3354          | /           | hypothetical protein                            |
| i02_3081       | c3356          | yqcA        | flavodoxin                                      |
| i02_3082       | c3357          | yqcB        | tRNA pseudouridine synthase C                   |
| i02_3083       | c3358          | yqcC        | hypothetical protein                            |
| i02_3084       | c3359          | syd         | SecY interacting protein Syd                    |
| i02_3085       | c3360          | queF        | 7-cyano-7-deazaguanine reductase                |
| i02_3086       | c3361          | ygdH        | hypothetical protein                            |
| i02_3087       | c3362          | /           | hypothetical protein                            |
|                | c3363          | /           | hypothetical protein                            |
| i02_3088       | c3364          | sdaC        | Serine transporter                              |
| i02_3089       | c3365          | sdaB        | L-serine dehydratase 2                          |
| i02_3090       | c3366          | xni         | exonuclease IX                                  |
| i02_3091       | c3367          | fucO        | L-1,2-propanediol oxidoreductase                |
| i02_3092       | c3368          | fucA        | L-fucose phosphate aldolase                     |
| i02_3093       | c3369          | /           | hypothetical protein                            |
| i02_3094       | c3370          | fucP        | L-fucose transporter                            |
| i02_3095       | c3371          | fucI        | L-fucose isomerase                              |
| i02_3096       |                | fucK        | culokinase                                      |
| i02_3097       | c3374          | fucU        | fucose operon fucU protein                      |
| i02_3098       | c3375          | fucR        | DNA-binding transcriptional activator FucR      |
| i02_3099       | c3376          | ygdE        | putative RNA 2'-O-ribose methyltransferase      |
| i02_3100       | c3377          | ygdD        | hypothetical protein                            |
| i02_3101       | c3378          | gcvA        | DNA-binding transcriptional activator GcvA      |

| Clone D  | CFT 073 | Gene | Product                                        |
|----------|---------|------|------------------------------------------------|
|          | c3379   | /    | hypothetical protein                           |
| i02_3102 | c3380   | ygdI | lipoprotein ygdI precursor                     |
| i02_3103 | c3381   | /    | cysteine sulfinase desulfinate                 |
| i02_3104 | c3382   | ygdK | hypothetical protein                           |
| i02_3105 | c3383   | ygdL | hypothetical protein                           |
| i02_3106 | c3384   | mltA | murein transglycosylase A                      |
| i02_3107 | c3385   | /    | hypothetical protein                           |
| i02_3108 | c3386   | /    | hypothetical protein                           |
| i02_3109 | c3387   | /    | hypothetical protein                           |
| i02_3110 | c3388   | /    | hypothetical protein                           |
| i02_3111 | c3389   | /    | hypothetical protein                           |
|          | c3390   | /    | hypothetical protein                           |
| i02_3112 | c3391   | /    | secreted protein Hcp                           |
| i02_3113 | c3392   | /    | ClpB protein                                   |
| i02_3114 | c3393   | /    | hypothetical protein                           |
| i02_3115 | c3394   | /    | hypothetical protein                           |
| i02_3116 | c3395   | /    | hypothetical protein                           |
| i02_3117 | c3396   | /    | hypothetical protein                           |
| i02_3118 | c3397   | /    | hypothetical protein                           |
| i02_3119 | c3398   | /    | hypothetical protein                           |
| i02_3120 | c3399   | /    | hypothetical protein                           |
| i02_3121 | c3400   | /    | hypothetical protein                           |
| i02_3122 | c3400   | /    | hypothetical protein                           |
| i02_3123 | c3401   | /    | hypothetical protein                           |
| i02_3124 | c3402   | /    | hypothetical protein                           |
| i02_3125 | c3403   | /    | hypothetical protein                           |
|          | c3404   | /    | hypothetical protein                           |
| i02_3127 | c3405   | /    | 2-hydroxyacid dehydrogenase                    |
| i02_3128 | c3406   | /    | phosphosugar isomerase                         |
| i02_3129 | c3407   | /    | Beta-cystathionase                             |
| i02_3130 | c3408   | /    | PTS system, maltose and glucose-specific IIABC |
| i02_3131 | c3409   | /    | antiterminator                                 |
| i02_3132 | c3410   | /    | hypothetical protein                           |
| i02_3133 | c3411   | /    | N-acetylmuramoyl-L-alanine amidase amiC        |
| i02_3134 | c3412   | argA | N-acetylglutamate synthase                     |
| i02_3135 | c3413   | recD | exonuclease V subunit alpha                    |
| i02_3136 | c3414   | recB | exonuclease V subunit beta                     |
| i02_3137 | c3415   | ptr  | protease III                                   |
| i02_3138 | c3416   | recC | exonuclease V subunit gamma                    |
| i02_3139 | c3417   | ppdC | hypothetical protein                           |
| i02_3140 | c3418   | ygdB | hypothetical protein                           |
| i02_3141 | c3419   | ppdB | hypothetical protein                           |
| i02_3142 | c3420   | ppdA | hypothetical protein                           |
| i02_3143 | c3422   | thyA | thymidylate synthase                           |
| i02_3144 | c3423   | lgt  | prolipoprotein diacylglycerol transferase      |
| i02_3145 | c3424   | ptsP | fused phosphoenolpyruvate-protein              |
| i02_3146 | c3425   | ygdP | dinucleoside polyphosphate hydrolase           |
| i02_3147 | c3426   | mutH | DNA mismatch repair protein                    |
| i02_3148 | c3427   | /    | hypothetical protein                           |
| i02_3149 | c3428   | ygdR | lipoprotein ygdR precursor                     |
| i02_3150 | c3429   | tas  | putative aldo-keto reductase                   |
| i02_3151 | c3430   | ygdE | lysophospholipid transporter LplT              |

| Clone D  | CFT 073 | Gene | Product                                         |
|----------|---------|------|-------------------------------------------------|
| i02_3152 | c3431   | aas  | bifunctional acyl-[acyl carrier protein]        |
| -        | c3432   | /    | transposase                                     |
| -        | c3433   | /    | hypothetical protein                            |
| i02_3153 | c3434   | galR | DNA-binding transcriptional regulator GalR      |
| i02_3154 | c3435   | lysA | diaminopimelate decarboxylase                   |
| i02_3155 | c3436   | lysR | DNA-binding transcriptional regulator LysR      |
| i02_3156 | c3437   | ygeA | putative racemase                               |
| i02_3157 | c3438   | araE | arabinose-proton symporter                      |
| i02_3158 | c3439   | kduD | 2-deoxy-D-gluconate 3-dehydrogenase             |
| i02_3159 | c3440   | kdul | 5-keto-4-deoxyuronate isomerase                 |
| i02_3160 | c3441   | yqeF | acetyl-CoA acetyltransferase                    |
| i02_3161 | c3442   | yqeG | putative transport protein YqeG                 |
| i02_3162 | c3443   | ygeR | lipoprotein ygeR precursor                      |
| i02_3163 | c3444   | /    | xanthine dehydrogenase subunit XdhA             |
| i02_3164 | c3445   | ygeT | xanthine dehydrogenase subunit XdhB             |
| i02_3165 | c3446   | /    | xanthine dehydrogenase subunit XdhC             |
| i02_3166 | c3447   | ygeV | putative sigma-54-dependent transcriptional     |
| i02_3167 | c3448   | ygeW | aspartate/ornithine carbamoyltransferase family |
| i02_3168 | c3449   | ygeX | diaminopropionate ammonia-lyase                 |
| i02_3169 | c3450   | ygeY | peptidase                                       |
| i02_3170 | c3451   | ygeZ | phenylhydantoinase                              |
| i02_3171 | c3452   | yqeA | carbamate kinase                                |
| i02_3172 | c3453   | yqeB | hypothetical protein                            |
| i02_3173 | c3454   | yqeC | hypothetical protein                            |
| i02_3174 | c3455   | ygfJ | hypothetical protein                            |
| i02_3175 | c3456   | ygfK | putative selenate reductase subunit YgfK        |
| i02_3176 | c3457   | /    | putative chlorohydrolase/aminohydrolase         |
| i02_3177 | c3458   | ygfM | putative selenate reductase subunit YgfM        |
| i02_3178 | c3459   | /    | putative selenate reductase subunit YgfN        |
| i02_3179 | c3460   | ygfO | putative purine permease ygfO                   |
| i02_3180 | c3461   | ygfP | guanine deaminase                               |
| i02_3181 | c3462   | /    | hypothetical protein                            |
| i02_3182 | c3463   | ygfS | putative electron transport protein ygfS        |
| i02_3183 | c3464   | ygfT | putative oxidoreductase Fe-S binding subunit    |
| i02_3184 | c3465   | ygfU | putative purine permease ygfU                   |
| i02_3185 | c3466   | /    | hypothetical protein                            |
| i02_3186 | c3467   | /    | isopentenyl-diphosphate delta-isomerase         |
| -        | c3468   | /    | hypothetical protein                            |
| i02_3188 | c3470   | /    | hypothetical protein                            |
| i02_3187 | c3469   | lysS | lysyl-tRNA synthetase                           |
| i02_3189 |         | prfB | peptide chain release factor 2                  |
| i02_3190 |         | /    | conserved hypothetical protein                  |
| i02_3191 | c5622   | prfB | peptide chain release factor 2                  |
| i02_3192 | c3472   | recJ | ssDNA exonuclease RecJ                          |
| i02_3193 | c3473   | dsbC | thiol:disulfide interchange protein DsbC        |
| i02_3194 | c3474   | xerD | site-specific tyrosine recombinase XerD         |
| i02_3195 | c3475   | fldB | flavodoxin FldB                                 |
| i02_3196 | c3476   | ygfX | hypothetical protein                            |
| i02_3198 | c3478   | /    | hypothetical protein                            |
| i02_3197 | c3477   | ygfY | hypothetical protein                            |
| i02_3199 | c3479   | ygfZ | putative global regulator                       |
| i02_3200 | c3480   | yqfA | hypothetical protein                            |

| <b>Clone D</b> | <b>CFT 073</b> | <b>Gene</b> | <b>Product</b>                                 |
|----------------|----------------|-------------|------------------------------------------------|
| i02_3201       | c3481          | yqfB        | hypothetical protein                           |
| i02_3202       | c3482          | bglA        | 6-phospho-beta-glucosidase BglA                |
| i02_3203       | c3483          | gcvP        | glycine dehydrogenase                          |
| i02_3204       | c3484          | gcvH        | glycine cleavage system protein H              |
| i02_3205       | c3485          | gcvT        | glycine cleavage system aminomethyltransferase |
| i02_3206       | c3486          | /           | hypothetical protein                           |
| i02_3207       | c3487          | /           | hypothetical protein                           |
| i02_3208       | c3488          | visC        | hypothetical protein                           |
| i02_3209       | c3489          | ubiH        | 2-octaprenyl-6-methoxyphenyl hydroxylase       |
| i02_3210       | c3490          | pepP        | proline aminopeptidase P II                    |
| i02_3211       | c3491          | ygfB        | hypothetical protein                           |
| i02_3212       | c3492          | ygfE        | Z-ring-associated protein                      |
| i02_3213       | c3493          | ygfA        | putative ligase                                |
| i02_3214       | c3494          | serA        | D-3-phosphoglycerate dehydrogenase             |
| i02_3215       | c3495          | rpiA        | ribose-5-phosphate isomerase A                 |
| i02_3216       | c3496          | yqfE        | hypothetical protein                           |
| i02_3218       | c3497          | iciA        | chromosome replication initiation inhibitor    |
| i02_3217       |                | /           | conserved hypothetical protein                 |
| i02_3219       | c3498          | /           | hypothetical protein                           |
| i02_3220       | c3499          | ygfI        | putative transcriptional regulator YgfI        |
| i02_3221       | c3500          | yggE        | hypothetical protein                           |
| i02_3222       | c3501          | yggA        | arginine exporter protein                      |
| i02_3223       | c3502          | yggB        | mechanosensitive channel MscS                  |
| i02_3224       | c3503          | fba         | fructose-bisphosphate aldolase                 |
| i02_3225       | c3504          | pgk         | phosphoglycerate kinase                        |
| i02_3226       | c3505          | epd         | erythrose 4-phosphate dehydrogenase            |
| i02_3227       | c3506          | /           | hypothetical protein                           |
| i02_3228       | c3507          | /           | hypothetical protein                           |
| i02_3229       | c3508          | /           | hypothetical protein                           |
| i02_3230       | c3509          | /           | ABC transporter ATP-binding protein            |
| i02_3231       | c3510          | /           | ABC transporter ATP-binding protein            |
| i02_3232       | c3511          | frckK       | putative fructose transport system kinase      |
| i02_3233       | c3512          | yggD        | putative DNA-binding transcriptional regulator |
| i02_3234       | c3513          | /           | hypothetical protein                           |
| i02_3235       | c3514          | /           | putative oxidoreductase                        |
| i02_3236       | c3515          | cmtA        | PTS system, mannitol (Cryptic)-specific IIBC   |
| i02_3237       | c3516          | cmtB        | putative mannitol phosphotransferase subunit   |
| i02_3238       | c3517          | /           | hypothetical protein                           |
| i02_3239       | c3520          | tktA        | transketolase                                  |
| i02_3240       | c3521          | yggG        | putative metalloprotease yggG                  |
| i02_3241       | c3522          | speB        | agmatinase                                     |
| i02_3242       | c3523          | /           | hypothetical protein                           |
| i02_3243       | c3524          | speA        | arginine decarboxylase                         |
| i02_3244       | c3525          | yqgB        | hypothetical protein                           |
|                | c3526          | /           | hypothetical protein                           |
| i02_3245       | c3527          | yqgD        | hypothetical protein                           |
| i02_3246       | c3528          | metK        | S-adenosylmethionine synthetase                |
| i02_3247       | c3529          | galP        | galactose-proton symporter                     |
| i02_3248       | c3530          | sprT        | hypothetical protein                           |
| i02_3249       | c3531          | endA        | endonuclease I precursor                       |
| i02_3250       | c3532          | yggJ        | 16S ribosomal RNA methyltransferase RsmE       |
| i02_3251       | c3533          | gshB        | glutathione synthetase                         |

| <b>Clone D</b> | <b>CFT 073</b> | <b>Gene</b> | <b>Product</b>                            |
|----------------|----------------|-------------|-------------------------------------------|
| i02_3252       | c3534          | yqgE        | hypothetical protein                      |
| i02_3253       | c3535          | yqgF        | Holliday junction resolvase-like protein  |
| i02_3255       | c3537          | yggS        | hypothetical protein                      |
| i02_3254       | c3536          | yggR        | hypothetical protein                      |
| i02_3256       | c3538          | yggT        | hypothetical protein                      |
| i02_3257       | c3539          | yggU        | hypothetical protein                      |
| i02_3258       | c3540          | yggV        | putative deoxyribonucleotide triphosphate |
| i02_3259       | c3541          | yggW        | coproporphyrinogen III oxidase            |
| i02_3260       | c3542          | yggM        | hypothetical protein                      |
| i02_3261       | c3543          | ansB        | L-asparaginase II                         |
| i02_3262       | c3544          | yggN        | hypothetical protein                      |
| i02_3263       | c3545          | /           | hypothetical protein                      |
| i02_3264       | c3546          | yggL        | hypothetical protein                      |
| i02_3265       | c3547          | trmB        | tRNA (guanine-N(7)-)-methyltransferase    |
| i02_3266       | c3548          | mutY        | adenine DNA glycosylase                   |
|                | c3549          | /           | hypothetical protein                      |
| i02_3267       | c3550          | yggX        | hypothetical protein                      |
| i02_3268       | c3551          | mltC        | murein transglycosylase C                 |
| i02_3269       | c3552          | nupG        | nucleoside permease nupG                  |
| i02_3270       | c3553          | speC        | ornithine decarboxylase                   |
| i02_3271       | c3554          | /           | hypothetical protein                      |
| i02_3272       | c3555          | yqgA        | hypothetical protein                      |
| i02_3273       | c3556          | /           | prophage P4 integrase                     |
| i02_3274       | c3557          | /           | ShiA-like protein                         |
| i02_3275       | c3558          | /           | hypothetical protein                      |
| i02_3276       | -              | insA        | InsA protein                              |
| i02_3277       | -              | insb        | InsB protein                              |
| -              | c3559          | /           | hypothetical protein                      |
| -              | c3560          | /           | hypothetical protein                      |
| -              | c3561          | /           | hypothetical protein                      |
| -              | c3562          | /           | hypothetical protein                      |
| -              | c3563          | /           | hypothetical protein                      |
| -              | c3564          | /           | hypothetical protein                      |
| -              | c3565          | /           | putative response regulator               |
| -              | c3566          | /           | hypothetical protein                      |
| -              | c3567          | /           | hypothetical protein                      |
| -              | c3568          | /           | hypothetical protein                      |
| -              | c3569          | hlyC        | hemolysin C                               |
| -              | c3571          | /           | hypothetical protein                      |
|                | c3570          | hlyA        | hemolysin A                               |
| -              | c3572          | /           | hypothetical protein                      |
| -              | c3573          | hlyB        | hemolysin B                               |
| -              | c3574          | hlyD        | hemolysin D                               |
| -              | c3575          | /           | transposase insF                          |
| -              | c3576          | /           | hypothetical protein                      |
| -              | c3577          | /           | hypothetical protein                      |
| -              | c3578          | /           | hypothetical protein                      |
| -              | c3579          | /           | hypothetical protein                      |
| -              | c3580          | /           | hypothetical protein                      |
| -              | c3581          | /           | hypothetical protein                      |
| i02_3278       | c3582          | papX        | PapX protein                              |
| i02_3279       | -              | /           | hypothetical protein                      |

| Clone D   | CFT 073 | Gene | Product                                      |
|-----------|---------|------|----------------------------------------------|
| i02_3280  | -       | /    | IS1 protein InsB                             |
| i02_3281  | -       | /    | insertion element IS1 1/2/3/5/6 protein insA |
| -         | c3583   | papG | PapG protein                                 |
| -         | c3584   | papF | PapF protein                                 |
| -         | c3585   | papE | PapE protein                                 |
| -         | c3586   | papK | PapK protein                                 |
| -         | c3587   | /    | hypothetical protein                         |
| -         | c3588   | papJ | PapJ protein                                 |
| -         | c3589   | papD | PapD protein                                 |
| -         | c3590   | papC | PapC protein                                 |
| -         | c3591   | papH | PapH protein                                 |
| i02_3282  | c3592   | papA | PapA protein                                 |
| i02_3284  |         | /    | PapB-like protein                            |
| i02_3286  | c3593   | papI | PapI protein                                 |
|           | c3596   | /    | hypothetical protein                         |
| i02_3287  | c3594   | /    | putative transposase                         |
| i02_3287  | c3595   | /    | transposase                                  |
|           | c3596   | /    | Insertion Sequence Associated                |
| i02_3288  |         | /    | hypothetical protein                         |
| i02_3289  | c3597   | /    | transposase                                  |
| i02_3290  | c3598   | /    | hypothetical protein                         |
| i02_3291  | c3599   | /    | hypothetical protein                         |
| i02_3292  | c3600   | /    | hypothetical protein                         |
| i02_3293  | c3601   | /    | hypothetical protein                         |
| i02_3294  | c3612   | /    | transposase insC                             |
| i02_3294a | c3611   | /    | insertion element IS2 transposase InsD       |
| i02_3295  | c3610   | iha  | bifunctional enterobactin receptor/adhesin   |
| i02_3296  | c3609   | /    | hypothetical protein                         |
| -         | c3608   | /    | hypothetical protein                         |
| -         | c3607   | /    | hypothetical protein                         |
| i02_3297  | c3606   | /    | hypothetical protein                         |
| i02_3298  | c3605   | /    | hypothetical protein                         |
|           | c3604   |      |                                              |
| i02_3299  | c3603   | /    | hypothetical protein                         |
| i02_3300  | c3602   | /    | hypothetical protein                         |
| i02_3301  |         | /    | conserved hypothetical protein               |
| i02_3302  |         | /    | putative transposase                         |
| i02_3303  | -       | /    | conserved hypothetical protein               |
| i02_3304  |         | /    | IS1353 transposase family protein            |
| i02_3305  | -       | /    | transposase                                  |
| i02_3307  | -       | /    | transposase IS3 family                       |
| -         | c3613   | /    | hypothetical protein                         |
| -         | c3614   | /    | hypothetical protein                         |
| -         | c3615   | /    | hypothetical protein                         |
| -         | c3616   | /    | hypothetical protein                         |
| -         | c3617   | /    | hypothetical protein                         |
| i02_3308  | c3618   | /    | hypothetical protein                         |
| i02_3310  | -       | insI | transposase insI                             |
| i02_3311  | -       | /    | hypothetical protein                         |
| i02_3309  | -       | /    | transposase insF                             |
| i02_3312  | c3618   | /    | hypothetical protein                         |
|           | c3621   | /    | hypothetical protein                         |



| Clone D  | CFT 073 | Gene | Product                                 |
|----------|---------|------|-----------------------------------------|
| i02_3313 | c3619   | sat  | secreted auto transpoter toxin          |
| i02_3315 | c3622   | /    | hypothetical protein                    |
| i02_3316 | c3623   | iutA | lutA protein                            |
| i02_3317 | c3624   | iucD | lucD protein                            |
| i02_3318 | c3625   | iucC | lucC protein                            |
| i02_3319 | c3626   | iucB | lucB protein                            |
| i02_3320 | c3627   | iucA | lucA protein                            |
| i02_3321 | c3628   | shiF | shiF protein                            |
|          | c3629   | /    | hypothetical protein                    |
| i02_3323 | -       | /    | insertion element IS2 transposase InsD  |
| i02_3324 | -       | /    | transposase insC                        |
| i02_3325 | c3630   | /    | hypothetical protein                    |
| i02_3326 | c3631   | /    | hypothetical protein                    |
| i02_3327 | c3632   | /    | hypothetical protein                    |
| i02_3328 | c3633   | /    | hypothetical protein                    |
| i02_3329 | c3634   | /    | hypothetical protein                    |
| i02_3330 | c3635   | /    | hypothetical protein                    |
| i02_3331 | c3636   | /    | hypothetical protein                    |
| i02_3332 | c3637   | /    | putative sialic acid transporter        |
| i02_3333 | c3638   | /    | N-acetylmannosamine kinase              |
| i02_3334 | c3639   | /    | N-acetylneuraminate lyase               |
| i02_3335 | c3640   | /    | hypothetical protein                    |
| i02_3336 | c3641   | /    | hypothetical protein                    |
|          | c3642   | /    | hypothetical protein                    |
| i02_3337 | c3643   | /    | hypothetical protein                    |
|          | c3644   | /    | hypothetical protein                    |
| i02_3338 | c3645   | /    | hypothetical protein                    |
| i02_3339 | c3646   | /    | hypothetical protein                    |
| i02_3340 | c3647   | /    | hypothetical protein                    |
| i02_3341 | c3648   | /    | hypothetical protein                    |
| i02_3342 |         | /    | predicted protein                       |
| i02_3343 | c3649   | /    | hemolysin expression modulating protein |
| i02_3344 |         | /    | hypothetical protein                    |
| i02_3345 | c3650   | /    | hypothetical protein                    |
| i02_3346 | c3651   | /    | hypothetical protein                    |
| i02_3347 | c3652   | /    | hypothetical protein                    |
| i02_3348 | c3653   | /    | hypothetical protein                    |
| i02_3349 |         | /    | conserved hypothetical protein          |
| i02_3350 | c3654   | /    | hypothetical protein                    |
| i02_3351 | c3655   | /    | antigen 43 precursor                    |
| -        | c3656   | /    | hypothetical protein                    |
| -        | c3657   | /    | hypothetical protein                    |
| -        | c3658   | /    | hypothetical protein                    |
| -        | c3659   | /    | hypothetical protein                    |
| -        | c3660   | /    | hypothetical protein                    |
| -        | c3661   | /    | hypothetical protein                    |
| -        | c3662   | /    | hypothetical protein                    |
| -        | c3663   | /    | hypothetical protein                    |
| -        | c3664   | /    | hypothetical protein                    |
| i02_3352 | c3665   | /    | hypothetical protein                    |
| i02_3353 | c3666   | /    | hypothetical protein                    |
|          | c3667   | /    | hypothetical protein                    |

| Clone D   | CFT 073    | Gene | Product                                          |
|-----------|------------|------|--------------------------------------------------|
| i02_3354  | c3668      | /    | hypothetical protein                             |
|           | c3669      | /    | hypothetical protein                             |
| i02_3356  | c3671      | /    | putative radC-like protein yeeS                  |
| i02_3355  | c3670      | /    | hypothetical protein                             |
|           | c3673      | /    | hypothetical protein                             |
| i02_3358  | c3674      | /    | hypothetical protein                             |
| i02_3357  | c3672      | /    | hypothetical protein                             |
|           | c3676      | /    | hypothetical protein                             |
| i02_3360  | c3677      | /    | hypothetical protein                             |
| i02_3359  | c3675      | /    | hypothetical protein                             |
| i02_3361  | c3678      | /    | hypothetical protein                             |
|           | c3679      | /    | hypothetical protein                             |
| i02_3362  | c3680      | /    | hypothetical protein                             |
| i02_3363  | c3681      | /    | hypothetical protein                             |
| i02_3364  | c3682      | /    | hypothetical protein                             |
| i02_3365  | c3683      | /    | hypothetical protein                             |
| i02_3366  | c3684      | /    | hypothetical protein                             |
| i02_3367  | c3685      | /    | hypothetical protein                             |
| i02_3368  | c3686      | /    | hypothetical protein                             |
| i02_3369  | c3687      | kpsE | KpsE protein                                     |
| i02_3370  | c3688      | kpsD | KpsD protein                                     |
| i02_3371  | c3689      | /    | 3-deoxy-manno-octulosonate cytidyltransferase    |
| i02_3372  | c3690      | kpsC | KpsC protein                                     |
| i02_3373  | c3691      | kpsS | KpsS protein                                     |
| -         | c3692      | /    | hypothetical protein                             |
| -         | c3693      | /    | hypothetical protein                             |
| i02_3373a |            | kfiD | UDP-glucose 6-dehydrogenase                      |
| i02_3374  | -          | /    | glycosyltransferase KfiC                         |
| i02_3375  | -          | /    | conserved hypothetical protein                   |
| i02_3376  |            | kfiB | kfiB protein                                     |
|           | c3694      | /    | hypothetical protein                             |
| -         | c3695      | /    | hypothetical protein                             |
| -         | c3696      | /    | Putative glycerol-3-phosphate cytidyltransferase |
| i02_3377  | c3697      | kpsT | KpsT protein                                     |
| i02_3378  | c3698      | kpsM | KpsM protein                                     |
| i02_3379  | c3699      | yghD | putative general secretion pathway protein YghD  |
| i02_3380  | pseudogene | gspL | GspL-like protein                                |
| i02_3381  | pseudogene | gspK | hypothetical protein                             |
|           | c3703      | /    | IS, phage, Tn; Transposon-related function       |
| i02_3382  | -          | gspJ | putative type II secretion protein GspJ          |
| i02_3383  | -          | gspI | putative type II secretion protein GspI          |
| i02_3384  | -          | gspH | putative type II secretion protein GspH          |
| i02_3385  | -          | gspG | putative type II secretion protein GspG          |
| i02_3386  | -          | gspF | putative type II secretion protein GspF          |
| i02_3387  | -          | gspE | putative type II secretion protein GspE          |
| i02_3388  | -          | gspD | putative type II secretion protein GspD          |
| i02_3389  | -          | gspC | putative type II secretion protein GspC          |
| i02_3390  | -          | /    | hypothetical protein                             |
| i02_3391  | -          | pppA | putative prepilin peptidase A                    |
| i02_3392  | -          | yghJ | putative lipoprotein AcfD-like precursor         |
| i02_3393  | -          | /    | hypothetical protein                             |
| i02_3394  | -          | /    | conserved hypothetical protein                   |

| <b>Clone D</b> | <b>CFT 073</b> | <b>Gene</b> | <b>Product</b>                                |
|----------------|----------------|-------------|-----------------------------------------------|
| i02_3395       | c3704          | yghK        | glycolate transporter                         |
| i02_3396       | c3705          | glcB        | malate synthase G                             |
| i02_3397       | c3706          | glcG        | hypothetical protein                          |
| i02_3398       |                | pir         | glycolate oxidase iron-sulfur subunit         |
| i02_3399       |                | glcE        | glycolate oxidase FAD binding subunit         |
| i02_3400       | c3709          | glcD        | glycolate oxidase subunit GlcD                |
| i02_3401       | c3710          | glcC        | DNA-binding transcriptional regulator GlcC    |
| i02_3402       | c3711          | yghO        | hypothetical protein                          |
| i02_3403       | c3712          | /           | acyl-CoA synthetase                           |
| i02_3404       | c3713          | /           | hypothetical protein                          |
| i02_3405       | c3714          | /           | hypothetical protein                          |
| i02_3406       | c3715          | /           | hypothetical protein                          |
| i02_3407       | c3716          | /           | hypothetical protein                          |
| i02_3408       | c3717          | /           | hypothetical protein                          |
| i02_3409       | c3718          | /           | hypothetical protein                          |
| i02_3410       | c3719          | /           | hypothetical protein                          |
| i02_3411       | c3720          | yghQ        | hypothetical protein                          |
| i02_3412       | c3721          | yghR        | ATP-binding protein yghR                      |
| i02_3413       | c3722          | yghS        | ATP-binding protein yghS                      |
| i02_3414       | c3723          | yghT        | ATP-binding protein yghT                      |
| i02_3415       | c3724          | pitB        | inorganic phosphate transporter               |
| i02_3416       | c3725          | gsp         | bifunctional glutathionylspermidine           |
| i02_3417       | c3726          | yghU        | putative glutathione S-transferase YghU       |
| i02_3418       | c3727          | hybG        | hydrogenase 2 accessory protein HypG          |
| i02_3419       | c3728          | hypA        | hydrogenase nickel incorporation protein HybF |
| i02_3420       | c3729          | hybE        | hydrogenase 2-specific chaperone              |
| i02_3421       | c3730          | hybD        | hydrogenase 2 maturation endopeptidase        |
| i02_3422       | c3731          | hybC        | hydrogenase 2 large subunit                   |
| i02_3423       | c3732          | hybB        | putative hydrogenase 2 b cytochrome subunit   |
| i02_3424       | c3733          | hybA        | hydrogenase 2 protein HybA                    |
| i02_3426       |                | /           | hypothetical protein                          |
| i02_3425       | c3734          | /           | hydrogenase 2 small subunit                   |
| i02_3427       | c3735          | yghW        | hypothetical protein                          |
| i02_3428       | c3736          | /           | hypothetical protein                          |
| i02_3429       | c3737          | yghZ        | aldo-keto reductase                           |
| i02_3430       | c3738          | yqhA        | hypothetical protein                          |
| i02_3431       | c3739          | yghA        | oxidoreductase                                |
| i02_3432       | c3740          | exbD        | biopolymer transport protein ExbD             |
| i02_3433       | c3741          | exbB        | biopolymer transport protein ExbB             |
| i02_3434       | c3742          | metC        | cystathionine beta-lyase                      |
| i02_3435       | c3743          | yghB        | hypothetical protein                          |
| i02_3437       | c3745          | yqhD        | oxidoreductase yqhD                           |
| i02_3436       | c3744          | yqhC        | putative transcriptional regulator YqhC       |
| i02_3438       | c3746          | dkgA        | 2,5-diketo-D-gluconate reductase A            |
| i02_3439       | c3747          | yqhG        | hypothetical protein                          |
| i02_3440       | c3748          | yqhH        | putative outer membrane lipoprotein           |
| i02_3441       | c3749          | /           | hypothetical protein                          |
| i02_3442       | c3750          | /           | putative regulator                            |
| i02_3443       | c3751          | /           | oxidoreductase ydfI                           |
| i02_3444       | c3752          | /           | hypothetical protein                          |
| i02_3445       | c3753          | /           | ureidoglycolate dehydrogenase                 |
| i02_3446       | c3754          | /           | putative c4-dicarboxylate transport system    |

| <b>Clone D</b> | <b>CFT 073</b> | <b>Gene</b> | <b>Product</b>                                  |
|----------------|----------------|-------------|-------------------------------------------------|
| i02_3447       | c3755          | /           | hypothetical protein                            |
| i02_3448       | c3756          | ygiK        | c4-dicarboxylate permease                       |
| i02_3449       | c3757          | sufI        | repressor protein for FtsI                      |
| i02_3450       | c3758          | plsC        | 1-acyl-sn-glycerol-3-phosphate acyltransferase  |
| i02_3451       | c3759          | /           | hypothetical protein                            |
| i02_3452       | c3760          | parC        | DNA topoisomerase IV subunit A                  |
| i02_3453       | c3761          | /           | putative binding protein                        |
| i02_3454       | c3762          | ygiV        | hypothetical protein                            |
| i02_3455       | c3763          | ygiW        | hypothetical protein                            |
| i02_3456       | c3764          | ygiX        | DNA-binding transcriptional regulator QseB      |
| i02_3457       | c3765          | ygiY        | sensor protein QseC                             |
| i02_3458       |                | /           | hypothetical protein                            |
| i02_3459       | c3766          | /           | hypothetical protein                            |
| i02_3460       | c3767          | /           | hypothetical protein                            |
| i02_3461       | c3768          | mdaB        | modulator of drug activity B                    |
| i02_3462       | c3769          | ygiN        | hypothetical protein                            |
| i02_3463       | c3770          | /           | hypothetical protein                            |
| i02_3464       | c3771          | /           | iron ABC transporter substrate-binding protein  |
| i02_3465       | c3772          | /           | iron ABC transporter permease                   |
| i02_3466       | c3773          | /           | iron ABC transporter permease                   |
| i02_3467       | c3774          | /           | ferric enterobactin transport ATP-binding       |
| i02_3468       |                | /           | hypothetical protein                            |
| i02_3469       | c3775          | /           | putative iron compound receptor                 |
| i02_3470       | c3776          | parE        | DNA topoisomerase IV subunit B                  |
| i02_3471       | c3777          | yqiA        | esterase YqiA                                   |
| i02_3472       | c3778          | icc         | cyclic 3',5'-adenosine monophosphate            |
| i02_3473       | c3779          | yqiB        | hypothetical protein                            |
| i02_3474       | c3780          | nudF        | ADP-ribose pyrophosphatase NudF                 |
| i02_3475       | c3781          | tolC        | outer membrane channel protein                  |
| i02_3476       | c3782          | ygiA        | hypothetical protein                            |
| i02_3477       | c3783          | ygiB        | hypothetical protein                            |
| i02_3478       | c3784          | ygiC        | hypothetical protein                            |
| i02_3479       | c3785          | asst        | arylsulfate sulfotransferase                    |
| i02_3480       | c3786          | /           | putative disulfide isomerase                    |
| i02_3481       | c3787          | /           | putative disulfide oxidoreductase               |
| i02_3482       | c3788          | ygiD        | hypothetical protein                            |
| i02_3483       | c3789          | ygiE        | zinc transporter ZupT                           |
| i02_3484       | c3790          | /           | hypothetical protein                            |
| i02_3485       | c3791          | ygiL        | putative fimbrial protein                       |
| i02_3486       | c3792          | yqiG        | outer membrane usher protein yqiG precursor     |
| i02_3487       | c3793          | yqiH        | fimbrial chaperone yqiH precursor               |
| i02_3488       | c3794          | /           | hypothetical protein                            |
| i02_3489       | c3795          | ribB        | 3,4-dihydroxy-2-butanone 4-phosphate synthase   |
| i02_3490       | c3796          | yqiC        | hypothetical protein                            |
| i02_3491       | c3797          | glgS        | glycogen synthesis protein GlgS                 |
| i02_3492       | c3798          | yqiJ        | hypothetical protein                            |
| i02_3493       | c3799          | yqiK        | hypothetical protein                            |
| i02_3494       | c3800          | /           | bifunctional heptose 7-phosphate kinase/heptose |
| i02_3495       | c3801          | glnE        | bifunctional glutamine-synthetase               |
| i02_3496       | c3802          | ygiF        | hypothetical protein                            |
| i02_3497       | c3803          | /           | putative transposase                            |
| i02_3498       | c3804          | ydcM        | hypothetical protein                            |

| <b>Clone D</b> | <b>CFT 073</b> | <b>Gene</b> | <b>Product</b>                                |
|----------------|----------------|-------------|-----------------------------------------------|
| i02_3499       |                | /           | hypothetical protein                          |
| i02_3500       | c3805          | ygIM        | putative signal transduction protein          |
| i02_3501       | c3806          | cca         | multifunctional tRNA nucleotidyl              |
| i02_3502       | c3807          | uppP        | undecaprenyl pyrophosphate phosphatase        |
| i02_3503       | c3808          | folB        | bifunctional dihydroneopterin                 |
| i02_3504       | c3809          | ygIH        | putative glycerol-3-phosphate acyltransferase |
| i02_3506       | c3811          | /           | hypothetical protein                          |
| i02_3505       | c3810          | ygIP        | transcriptional activator TtdR                |
| i02_3507       | c3812          | ttdA        | tartrate dehydratase subunit alpha            |
| i02_3508       | c3813          | ttdB        | L(+)-tartrate dehydratase subunit beta        |
| i02_3509       | c3814          | ygjE        | putative tartrate carrier/transporter         |
| i02_3510       | c3815          | ygjD        | putative DNA-binding/iron metalloprotein      |
| i02_3511       | c3816          | rpsU        | 30S ribosomal protein S21                     |
| i02_3512       | c3817          | dnaG        | DNA primase                                   |
| i02_3513       | c3818          | /           | hypothetical protein                          |
| i02_3514       | c3819          | /           | hypothetical protein                          |
| i02_3514       | c3821          | rpoD        | RpoD protein                                  |
| i02_3515       | c3820          | /           | hypothetical protein                          |
| i02_3516       | c3822          | ygjF        | G/U mismatch-specific DNA glycosylase         |
| i02_3517       | c3823          | ygjH        | hypothetical protein                          |
| i02_3518       | c3824          | yqjI        | hypothetical protein                          |
| i02_3519       | c3825          | aer         | aerotaxis receptor                            |
|                | c3826          | /           | hypothetical protein                          |
|                | c3827          | /           | hypothetical protein                          |
| i02_3520       | c3828          | ygjG        | putrescine--2-oxoglutarate aminotransferase   |
| i02_3521       | c3829          | /           | hypothetical protein                          |
|                | c3830          | ygjH        | hypothetical protein                          |
| i02_3522       | c3831          | /           | hypothetical protein                          |
| i02_3523       | c3832          | ebgR        | DNA-binding transcriptional repressor EbgR    |
| i02_3524       | c3833          | ebgA        | cryptic beta-D-galactosidase subunit alpha    |
| i02_3525       | c3834          | ebgC        | cryptic beta-D-galactosidase subunit beta     |
|                | c3835          | /           | hypothetical protein                          |
| i02_3527       | c3836          | yqjI        | putative transporter YqjI                     |
| i02_3528       | c3837          | ygjJ        | hypothetical protein                          |
| i02_3529       | c3838          | ygjK        | putative glycosyl hydrolase                   |
| i02_3530       | c3839          | ygjL        | 2,4-dienoyl-CoA reductase                     |
| i02_3531       | c3840          | /           | hypothetical protein                          |
| i02_3532       | c3841          | /           | hypothetical protein                          |
| i02_3533       | c3842          | ygjO        | putative ribosomal RNA small subunit          |
| i02_3534       | c3843          | ygjP        | hypothetical protein                          |
| i02_3535       | c3844          | ygjQ        | hypothetical protein                          |
| i02_3536       | c3845          | ygjR        | oxidoreductase ygjR                           |
| i02_3537       | c3846          | ygjT        | hypothetical protein                          |
| i02_3538       | c3847          | ygjU        | serine/threonine transporter SstT             |
| i02_3539       | c3848          | ygjV        | hypothetical protein                          |
| i02_3540       | c3849          | uxaA        | Altronate hydrolase                           |
| i02_3541       | c3850          | uxaC        | glucuronate isomerase                         |
| i02_3542       | c3851          | exuT        | hexuronate transporter                        |
| i02_3543       | c3852          | exuR        | DNA-binding transcriptional repressor ExuR    |
| i02_3544       | c3853          | yqjA        | hypothetical protein                          |
| i02_3545       | c3854          | yqjB        | hypothetical protein                          |
| i02_3546       | c3855          | yqjC        | hypothetical protein                          |

| <b>Clone D</b> | <b>CFT 073</b> | <b>Gene</b> | <b>Product</b>                                        |
|----------------|----------------|-------------|-------------------------------------------------------|
| i02_3547       | c3856          | yqjD        | hypothetical protein                                  |
| i02_3548       | c3857          | yqjE        | hypothetical protein                                  |
| i02_3549       | c3858          | yqjK        | hypothetical protein                                  |
| i02_3550       | c3859          | yqjF        | hypothetical protein                                  |
| i02_3551       |                | yqjG        | putative glutathione S-transferase                    |
| i02_3552       | c3862          | yhaH        | hypothetical protein                                  |
| i02_3553       | c3863          | yhaJ        | putative transcriptional regulator YhaJ               |
| i02_3554       | c3864          | yhaK        | hypothetical protein                                  |
|                | c3865          | /           | hypothetical protein                                  |
| i02_3555       | c3866          | yhaL        | hypothetical protein                                  |
| i02_3556       | c3867          | /           | hypothetical protein                                  |
| i02_3557       |                | /           | putative amino acid permease                          |
| i02_3558       | c3870          | /           | L-serine dehydratase 1                                |
| i02_3559       | c3871          | yhaR        | hypothetical protein                                  |
| i02_3560       | c3872          | tdcE        | keto-acid formate acetyltransferase                   |
| i02_3561       | c3873          | tdcD        | propionate/acetate kinase                             |
| i02_3562       | c3874          | tdcC        | threonine/serine transporter TdcC                     |
| i02_3563       | c3875          | tdcB        | threonine dehydratase                                 |
| i02_3564       | c3876          | tdcA        | DNA-binding transcriptional activator TdcA            |
| i02_3565       | c3877          | tdcR        | DNA-binding transcriptional activator TdcR            |
| i02_3566       | c3878          | /           | hypothetical protein                                  |
| i02_3567       |                | /           | hypothetical protein                                  |
| i02_3568       | c3879          | yhaD        | glycerate kinase I                                    |
| i02_3569       | c3880          | garR        | tartronate semialdehyde reductase                     |
| i02_3570       | c3881          | yhaF        | alpha-dehydro-beta-deoxy-D-glucarate aldolase         |
| i02_3571       | c3882          | yhaU        | galactarate transporter                               |
| i02_3572       |                | /           | hypothetical protein                                  |
| i02_3573       | c3883          | yhaG        | D-galactarate dehydratase                             |
| i02_3574       | c3884          | sohA        | putative regulator PrIF                               |
| i02_3575       | c3885          | yhaV        | hypothetical protein                                  |
| i02_3576       | c3886          | agaR        | DNA-binding transcriptional regulator AgaR            |
| i02_3577       | c3887          | agaZ        | putative tagatose 6-phosphate kinase agaZ             |
| i02_3578       | c3888          | agaV        | N-acetylgalactosamine-specific PTS system             |
| i02_3579       | c3889          | /           | putative phosphotransferase system enzyme             |
| i02_3580       | c3890          | /           | PTS system, N-acetylgalactosamine-specific IID        |
| i02_3581       | c3891          | /           | putative phosphotransferase system enzyme             |
| i02_3582       | c3892          | /           | putative N-acetylgalctosamine-6-phosphate             |
| i02_3583       | c3893          | agaS        | putative tagatose-6-phosphate aldose/ketose isomerase |
| i02_3584       | c3894          | kbaY        | tagatose-bisphosphate aldolase                        |
| i02_3585       | c3895          | agaB        | N-acetylgalactosamine-specific PTS system             |
| i02_3586       | c3896          | agaC        | N-acetylgalactosamine-specific PTS system             |
| i02_3587       | c3897          | agaD        | N-acetylgalactosamine-specific PTS system             |
| i02_3588       | c3898          | agal        | galactosamine-6-phosphate isomerase                   |
| i02_3590       | c3900          | yraM        | hypothetical protein                                  |
| i02_3589       | c3899          | yraL        | hypothetical protein                                  |
| i02_3591       | c3901          | yraN        | hypothetical protein                                  |
|                | c3902          | /           | hypothetical protein                                  |
| i02_3593       | c3903          | yraO        | DnaA initiator-associating protein DiaA               |
| i02_3594       | c3904          | yraP        | hypothetical protein                                  |
| i02_3595       | c3905          | yraQ        | hypothetical protein                                  |
| i02_3596       | c3906          | yraR        | hypothetical protein                                  |

| <b>Clone D</b> | <b>CFT 073</b> | <b>Gene</b> | <b>Product</b>                                               |
|----------------|----------------|-------------|--------------------------------------------------------------|
| i02_3597       | c3907          | yhbP        | hypothetical protein                                         |
| i02_3598       | c3908          | yhbQ        | GIY-YIG nuclease superfamily protein                         |
| i02_3599       | c3909          | yhbS        | acetyltransferase YhbS                                       |
| i02_3600       | c3910          | yhbT        | hypothetical protein                                         |
| i02_3601       | c3911          | yhbU        | putative protease yhbU precursor                             |
| i02_3602       | c3912          | yhbV        | hypothetical protein                                         |
| i02_3603       | c3913          | yhbW        | hypothetical protein                                         |
| i02_3604       | c3914          | mtr         | tryptophan permease                                          |
| i02_3605       | c3915          | /           | hypothetical protein                                         |
| i02_3606       | c3916          | deaD        | ATP-dependent RNA helicase DeaD                              |
|                | c3917          | /           | hypothetical protein                                         |
| i02_3607       | c3918          | yhbM        | lipoprotein Nlpl                                             |
|                | c3919          | /           | hypothetical protein                                         |
| i02_3608       | c3920          | pnp         | polynucleotide phosphorylase/polyadenylase                   |
| i02_3609       | c3921          | rpsO        | 30S ribosomal protein S15                                    |
| i02_3610       | c3922          | truB        | tRNA pseudouridine synthase B                                |
| i02_3611       | c3923          | rbfA        | ribosome-binding factor A                                    |
| i02_3613       | c3925          | /           | hypothetical protein                                         |
| i02_3612       | c3924          | infB        | translation initiation factor IF-2                           |
| i02_3614       | c3926          | nusA        | transcription elongation factor NusA                         |
| i02_3615       | c3927          | yhbC        | hypothetical protein                                         |
| i02_3616       | c3929          | argG        | argininosuccinate synthase                                   |
| i02_3617       | c3930          | yhbX        | Outer-membrane protein yhbX precursor                        |
| i02_3618       | c3931          | secG        | preprotein translocase subunit SecG                          |
| i02_3619       | c3932          | glmM        | phosphoglucosamine mutase                                    |
| i02_3620       | c3933          | folP        | dihydropteroate synthase                                     |
| i02_3622       | c3935          | /           | hypothetical protein                                         |
| i02_3621       |                | hflB        | ATP-dependent metalloprotease                                |
| i02_3623       | c3936          | rrmJ        | 23S rRNA methyltransferase J                                 |
| i02_3624       | c3937          | yhbY        | RNA-binding protein YhbY                                     |
| i02_3625       | c3938          | greA        | transcription elongation factor GreA                         |
| i02_3626       | c3939          | dacB        | D-alanyl-D-alanine                                           |
| i02_3627       | c3940          | obgE        | GTPase ObgE                                                  |
| i02_3628       | c3941          | yhbE        | putative transport protein YhbE                              |
|                | c3943          | /           | hypothetical protein                                         |
| i02_3630       | c3944          | /           | hypothetical protein                                         |
| i02_3629       | c3942          | rpmA        | 50S ribosomal protein L27                                    |
| i02_3631       | c3945          | ispB        | octaprenyl diphosphate synthase                              |
| i02_3632       | c3946          | nlp         | DNA-binding transcriptional regulator Nlp                    |
| i02_3633       | c3947          | murA        | UDP-N-acetylglucosamine                                      |
|                | c3949          | /           | hypothetical protein                                         |
| i02_3634       | c3948          | yrbA        | hypothetical protein                                         |
|                | c3951          | /           | hypothetical protein                                         |
| i02_3635       | c3950          | yrbB        | hypothetical protein                                         |
| i02_3636       | c3952          | yrbC        | hypothetical protein                                         |
| i02_3637       | c3953          | yrbD        | hypothetical protein                                         |
| i02_3638       | c3954          | yrbE        | hypothetical protein                                         |
| i02_3639       | c3955          | yrbF        | putative ABC transporter ATP-binding protein                 |
| i02_3640       | c3956          | yrbG        | putative calcium/sodium:proton antiporter                    |
| i02_3641       | c3957          | /           | D-arabinose 5-phosphate isomerase                            |
| i02_3642       | c3958          | yrbI        | 3-deoxy-D-manno-octulosonate 8-phosphate phosphatase monomer |

| <b>Clone D</b> | <b>CFT 073</b> | <b>Gene</b> | <b>Product</b>                                   |
|----------------|----------------|-------------|--------------------------------------------------|
| i02_3643       | c3959          | yrbK        | hypothetical protein                             |
| i02_3644       | c3960          | yhbN        | lipopolysaccharide transport periplasmic protein |
| i02_3645       | c3961          | yhbG        | putative ABC transporter ATP-binding protein     |
| i02_3646       | c3962          | rpoN        | RNA polymerase factor sigma-54                   |
| i02_3647       | c3963          | yhbH        | putative sigma(54) modulation protein            |
| i02_3648       | c3964          | ptsN        | PTS IIA-like nitrogen-regulatory protein PtsN    |
| i02_3649       | c3965          | yhbJ        | hypothetical protein                             |
| i02_3650       | c3966          | ptsO        | phosphohistidinoprotein-hexose                   |
| i02_3651       | c3967          | yrbL        | hypothetical protein                             |
| i02_3652       | c3968          | mtgA        | monofunctional biosynthetic peptidoglycan        |
| i02_3653       | c3969          | yhbL        | isoprenoid biosynthesis protein                  |
| i02_3654       | c3970          | arcB        | aerobic respiration control sensor protein ArcB  |
| i02_3655       | c3971          | yhcC        | hypothetical protein                             |
| i02_3656       | c3972          | /           | hypothetical protein                             |
| i02_3657       | c3973          | gltB        | glutamate synthase subunit alpha                 |
| i02_3658       | c3974          | gltD        | glutamate synthase subunit beta                  |
| i02_3659       | c3975          | yhcH        | hypothetical protein                             |
| i02_3660       | c3976          | /           | N-acetylmannosamine kinase                       |
| i02_3661       | c3977          | yhcJ        | N-acetylmannosamine-6-phosphate 2-epimerase      |
| i02_3662       | c3978          | nanT        | putative sialic acid transporter                 |
| i02_3663       | c3979          | nanA        | N-acetylneuraminate lyase                        |
| i02_3664       | c3980          | yhcK        | transcriptional regulator NanR                   |
| i02_3665       | c3981          | sspB        | ClpXP protease specificity-enhancing factor      |
| i02_3667       | c3983          | /           | hypothetical protein                             |
| i02_3666       | c3982          | sspA        | stringent starvation protein A                   |
| i02_3668       | c3984          | rpsI        | 30S ribosomal protein S9                         |
| i02_3669       | c3985          | rplM        | 50S ribosomal protein L13                        |
| i02_3670       | c3986          | yhcM        | hypothetical protein                             |
| i02_3671       | c3987          | yhcB        | cytochrome d ubiquinol oxidase subunit III       |
|                | c3988          | /           | hypothetical protein                             |
| i02_3672       | c3989          | degQ        | serine endoprotease                              |
| i02_3673       | c3990          | degS        | serine endoprotease                              |
| i02_3674       | c3991          | mdh         | malate dehydrogenase                             |
| i02_3675       | c3992          | argR        | arginine repressor                               |
| i02_3676       | c3993          | yhcN        | hypothetical protein                             |
| i02_3677       | c3994          | yhcO        | hypothetical protein                             |
| i02_3678       | c3995          | yhcP        | p-hydroxybenzoic acid efflux subunit AaeB        |
| i02_3679       | c3996          | yhcQ        | p-hydroxybenzoic acid efflux subunit AaeA        |
| i02_3680       | c3997          | yhcR        | hypothetical protein                             |
| i02_3681       | c3998          | yhcS        | putative DNA-binding transcriptional regulator   |
| i02_3682       | c3999          | tldD        | protease TldD                                    |
| i02_3683       | c4000          | yhdP        | hypothetical protein                             |
| i02_3684       | c4001          | cafA        | ribonuclease G                                   |
| i02_3685       | c4002          | maf         | Maf-like protein                                 |
| i02_3686       | c4003          | mreD        | rod shape-determining protein MreD               |
| i02_3687       | c4005          | mreC        | rod shape-determining protein MreC               |
| i02_3688       | c4006          | mreB        | rod shape-determining protein MreB               |
| i02_3689       | c4007          | /           | hypothetical protein                             |
| i02_3690       | c4008          | yhdA        | regulatory protein CsrD                          |
| i02_3691       | c4009          | yhdH        | hypothetical protein                             |
| i02_3692       | c4010          | /           | hypothetical protein                             |
| i02_3693       | c4011          | accB        | acetyl-CoA carboxylase biotin carboxyl carrier   |



| <b>Clone D</b> | <b>CFT 073</b> | <b>Gene</b> | <b>Product</b>                                 |
|----------------|----------------|-------------|------------------------------------------------|
| i02_3694       | c4012          | accC        | acetyl-CoA carboxylase biotin carboxylase      |
| i02_3695       | c4013          | /           | hypothetical protein                           |
| i02_3696       | c4014          | /           | hypothetical protein                           |
| i02_3697       | c4015          | /           | ribose ABC transporter permease                |
| i02_3698       | c4016          | /           | ribose ABC transporter ATP-binding protein     |
| i02_3699       | c4017          | /           | putative ribose ABC transporter                |
| i02_3701       | c4019          | /           | hypothetical protein                           |
| i02_3700       | c4018          | gatY        | tagatose-bisphosphate aldolase                 |
| i02_3702       | c4020          | /           | hypothetical protein                           |
| i02_3703       | c4021          | /           | hypothetical protein                           |
| i02_3704       | c4022          | yhdT        | hypothetical protein                           |
| i02_3705       | c4023          | panF        | sodium/panthothenate symporter                 |
| i02_3706       | c4024          | prmA        | ribosomal protein L11 methyltransferase        |
| i02_3707       | c4025          | /           | hypothetical protein                           |
| i02_3708       | c4026          | yhdG        | tRNA-dihydrouridine synthase B                 |
| i02_3709       | c4027          | fis         | DNA-binding protein Fis                        |
| i02_3710       | c4028          | yhdJ        | putative methyltransferase                     |
| i02_3711       | c4029          | yhdU        | hypothetical protein                           |
| i02_3712       | c4030          | envR        | DNA-binding transcriptional regulator EnvR     |
| i02_3713       | c4031          | acrE        | acriflavin resistance protein E                |
| i02_3714       | c4032          | acrF        | acriflavin resistance protein F                |
| i02_3715       | c4033          | yhdV        | hypothetical protein                           |
| i02_3716       |                | /           | hypothetical protein                           |
| i02_3717       | c4034          | yhdW        | putative amino-acid ABC transporter            |
| i02_3718       | c4035          | yhdX        | amino-acid ABC transporter permease protein    |
| i02_3719       | c4036          | yhdY        | amino-acid ABC transporter permease protein    |
| i02_3720       | c4037          | yhdZ        | amino-acid ABC transporter ATP-binding protein |
| i02_3722       | c4040          | yrdA        | hypothetical protein                           |
| i02_3723       | c4041          | yrdB        | hypothetical protein                           |
| i02_3724       | c4042          | aroE        | shikimate 5-dehydrogenase                      |
| i02_3725       | c4043          | yrdC        | putative ribosome maturation factor            |
| i02_3726       | c4044          | yrdD        | hypothetical protein                           |
| i02_3727       | c4045          | smg         | hypothetical protein                           |
| i02_3728       | c4046          | smf         | DNA protecting protein DprA                    |
| i02_3729       | c4047          | def         | peptide deformylase                            |
| i02_3730       | c4048          | fmt         | methionyl-tRNA formyltransferase               |
| i02_3731       | c4049          | sun         | 16S rRNA methyltransferase B                   |
| i02_3732       | c4050          | trkA        | potassium transporter                          |
| i02_3733       | c4051          | mscL        | large-conductance mechanosensitive channel     |
| i02_3734       | c4052          | yhdL        | putative regulator                             |
| i02_3735       | c4053          | zntR        | zinc-responsive transcriptional regulator      |
| i02_3736       | c4054          | yhdN        | hypothetical protein                           |
| i02_3737       | c4055          | rplQ        | 50S ribosomal protein L17                      |
| i02_3738       | c4056          | rpoA        | DNA-directed RNA polymerase subunit alpha      |
| i02_3739       | c4057          | rpsD        | 30S ribosomal protein S4                       |
|                | c4059          | /           | hypothetical protein                           |
| i02_3740       | c4058          | rpsK        | 30S ribosomal protein S11                      |
| i02_3741       | c4060          | rpsM        | 30S ribosomal protein S13                      |
| i02_3742       |                | /           | predicted protein                              |
| i02_3743       | c4061          | secY        | preprotein translocase subunit SecY            |
| i02_3744       | c4062          | rplO        | 50S ribosomal protein L15                      |
|                | c4064          | /           | hypothetical protein                           |

| <b>Clone D</b> | <b>CFT 073</b> | <b>Gene</b> | <b>Product</b>                                |
|----------------|----------------|-------------|-----------------------------------------------|
| i02_3745       | c4063          | rpmD        | 50S ribosomal protein L30                     |
| i02_3746       | c4065          | rpsE        | 30S ribosomal protein S5                      |
|                | c4067          | /           | hypothetical protein                          |
| i02_3747       | c4066          | rplR        | 50S ribosomal protein L18                     |
|                | c4069          | /           | hypothetical protein                          |
| i02_3748       | c4068          | rplF        | 50S ribosomal protein L6                      |
| i02_3750       | c4070          | rpsH        | 30S ribosomal protein S8                      |
| i02_3751       | c4071          | rpsN        | 30S ribosomal protein S14                     |
| i02_3752       | c4072          | rplE        | 50S ribosomal protein L5                      |
|                | c4074          | /           | hypothetical protein                          |
| i02_3753       | c4073          | rplX        | 50S ribosomal protein L24                     |
| i02_3755       | c4075          | rplN        | 50S ribosomal protein L14                     |
| i02_3756       | c4076          | rpsQ        | 30S ribosomal protein S17                     |
|                | c4078          | /           | hypothetical protein                          |
| i02_3757       | c4077          | rpmC        | 50S ribosomal protein L29                     |
| i02_3758       | c4079          | rplP        | 50S ribosomal protein L16                     |
| i02_3759       | c4080          | rpsC        | 30S ribosomal protein S3                      |
|                | c4081          | /           | hypothetical protein                          |
| i02_3760       | c4082          | rplV        | 50S ribosomal protein L22                     |
|                | c4084          | /           | hypothetical protein                          |
| i02_3761       | c4083          | rpsS        | 30S ribosomal protein S19                     |
| i02_3762       | c4085          | rplB        | 50S ribosomal protein L2                      |
|                | c4086          | /           | hypothetical protein                          |
|                | c4088          | /           | hypothetical protein                          |
| i02_3763       | c4087          | rplW        | 50S ribosomal protein L23                     |
|                | c4090          | /           | hypothetical protein                          |
| i02_3764       | c4089          | rplD        | 50S ribosomal protein L4                      |
| i02_3765       | c4091          | rplC        | 50S ribosomal protein L3                      |
| i02_3766       | c4092          | rpsJ        | 30S ribosomal protein S10                     |
| i02_3767       | c4093          | pinO        | chromosome replication protein PioO           |
| i02_3768       | c4094          | yheD        | general secretion pathway protein A           |
| i02_3769       | c4095          | yheE        | general secretion pathway protein C           |
| i02_3770       | c4096          | yheF        | general secretion pathway protein D precursor |
| i02_3771       | c4097          | yheG        | general secretion pathway protein E           |
| i02_3772       | c4098          | hofF        | putative general secretion pathway protein F  |
| i02_3773       | c4099          | hofG        | putative general secretion pathway protein G  |
| i02_3774       | c4100          | hofH        | putative general secretion pathway protein H  |
| i02_3775       | c4101          | yheH        | general secretion pathway protein I precursor |
| i02_3776       | c4102          | yheI        | general secretion pathway protein J precursor |
| i02_3777       | c4103          | yheJ        | general secretion pathway protein K           |
| i02_3778       | c4104          | yheK        | general secretion pathway protein L           |
| i02_3779       | c4105          | pshM        | putative general secretion pathway protein M  |
| i02_3780       | c4106          | hofD        | leader peptidase                              |
| i02_3781       | c4107          | bfr         | bacterioferritin                              |
| i02_3782       | c4108          | yheA        | bacterioferritin-associated ferredoxin        |
| i02_3783       |                | /           | hypothetical protein                          |
| i02_3784       | c4109          | chiA        | secreted endochitinase                        |
| i02_3785       | c4110          | /           | hypothetical protein                          |
| i02_3785a      | c4111          | tuf         | elongation factor Tu                          |
| i02_3786       | c4112          | fusA        | elongation factor G                           |
|                | c4113          | /           | hypothetical protein                          |
| i02_3787       | c4114          | rpsG        | 30S ribosomal protein S7                      |

| Clone D  | CFT 073 | Gene | Product                                       |
|----------|---------|------|-----------------------------------------------|
|          | c4115   | /    | hypothetical protein                          |
| i02_3788 | c4116   | rpsL | 30S ribosomal protein S12                     |
| i02_3789 | c4117   | yheL | sulfur transfer complex subunit TusB          |
| i02_3790 | c4118   | yheM | sulfur relay protein TusC                     |
| i02_3791 | c4119   | yheN | sulfur transfer complex subunit TusD          |
| i02_3792 | c4120   | yheO | hypothetical protein                          |
| i02_3793 | c4121   | fkpA | FKBP-type peptidyl-prolyl cis-trans isomerase |
| i02_3794 | c4122   | slyX | hypothetical protein                          |
| i02_3795 | c4123   | slyD | FKBP-type peptidyl-prolyl cis-trans isomerase |
| i02_3796 | c4124   | /    | hypothetical protein                          |
| i02_3797 | c4125   | kefB | glutathione-regulated potassium-efflux system |
| i02_3798 | c4126   | yheR | glutathione-regulated potassium-efflux system |
| i02_3799 | c4127   | yheS | putative ABC transporter ATP-binding protein  |
| i02_3800 | c4128   | yheT | putative hydrolase                            |
| i02_3801 | c4129   | yheU | hypothetical protein                          |
| i02_3802 | c4130   | prkB | phosphoribulokinase                           |
| i02_3803 | c4131   | yhfA | hypothetical protein                          |
| i02_3804 | c4132   | crp  | cAMP-regulatory protein                       |
| i02_3805 | c4133   | yhfK | hypothetical protein                          |
| i02_3806 | c4134   | argD | bifunctional                                  |
| i02_3807 | c4135   | pabA | para-aminobenzoate synthase component II      |
| i02_3808 | c4136   | fic  | cell filamentation protein Fic                |
| i02_3809 | c4137   | yhfG | hypothetical protein                          |
| i02_3810 | c4138   | ppiA | peptidyl-prolyl cis-trans isomerase A         |
| i02_3811 | c4139   | yhfC | hypothetical protein                          |
| i02_3813 | c4141   | nirB | nitrite reductase [NAD(P)H] large subunit     |
| i02_3812 | c4140   | /    | hypothetical protein                          |
| i02_3814 | c4142   | nirD | nitrite reductase small subunit               |
| i02_3815 | c4143   | nirC | nitrite transporter NirC                      |
| i02_3816 | c4144   | cysG | siroheme synthase                             |
| i02_3817 | c4145   | yhfL | hypothetical protein                          |
| i02_3818 | c4146   | yhfS | hypothetical protein                          |
| i02_3819 | c4147   | yhfT | hypothetical protein                          |
| i02_3820 | c4148   | yhfU | hypothetical protein                          |
| i02_3821 | c4149   | yhfV | putative hydrolase                            |
| i02_3822 | c4150   | yhfW | putative mutase                               |
| i02_3823 | c4151   | yhfX | hypothetical protein                          |
| i02_3824 | c4152   | yhfY | hypothetical protein                          |
| i02_3825 | c4153   | yhfZ | hypothetical protein                          |
| i02_3826 | c4154   | trpS | tryptophanyl-tRNA synthetase                  |
| i02_3827 | c4155   | gph  | phosphoglycolate phosphatase                  |
| i02_3828 | c4156   | rpe  | ribulose-phosphate 3-epimerase                |
| i02_3829 | c4157   | dam  | DNA adenine methylase                         |
| i02_3830 | c4158   | damX | hypothetical protein                          |
| i02_3831 | c4159   | aroB | 3-dehydroquinate synthase                     |
| i02_3832 | c4160   | aroK | shikimate kinase I                            |
| i02_3833 | c4161   | hofQ | outer membrane porin HofQ                     |
| i02_3834 | c4162   | yrfA | hypothetical protein                          |
| i02_3835 | c4163   | yrfB | hypothetical protein                          |
| i02_3836 | c4164   | yrfC | hypothetical protein                          |
| i02_3837 | c4165   | yrfD | hypothetical protein                          |
| i02_3838 | c4166   | mrcA | peptidoglycan synthetase                      |

| <b>Clone D</b> | <b>CFT 073</b> | <b>Gene</b> | <b>Product</b>                               |
|----------------|----------------|-------------|----------------------------------------------|
| i02_3839       | c4167          | nudE        | ADP-ribose diphosphatase NudE                |
| i02_3840       | c4168          | /           | hypothetical protein                         |
| i02_3841       | c4169          | yrfF        | putative membrane protein igaA-like protein  |
| i02_3842       | c4170          | yrfG        | hypothetical protein                         |
| i02_3843       | c4171          | yrfH        | ribosome-associated heat shock protein Hsp15 |
| i02_3844       | c4172          | hslO        | Hsp33-like chaperonin                        |
| i02_3845       | c4173          | yhgE        | hypothetical protein                         |
|                | c4174          | /           | hypothetical protein                         |
| i02_3846       | c4175          | /           | hypothetical protein                         |
| i02_3847       | c4176          | pckA        | phosphoenolpyruvate carboxykinase            |
| i02_3848       | c4177          | /           | hypothetical protein                         |
| i02_3849       | c4178          | /           | hypothetical protein                         |
| i02_3850       | c4179          | /           | hypothetical protein                         |
| i02_3851       | c4180          | envZ        | osmolarity sensor protein                    |
| i02_3852       | c4181          | ompR        | osmolarity response regulator                |
| i02_3854       | c4183          | greB        | transcription elongation factor GreB         |
| i02_3853       | c4182          | /           | hypothetical protein                         |
| i02_3855       | c4184          | yhgF        | hypothetical protein                         |
| i02_3856       | c4185          | feoA        | ferrous iron transport protein A             |
| i02_3857       | c4186          | feoB        | ferrous iron transport protein B             |
| i02_3858       | c4187          | yhgG        | hypothetical protein                         |
| i02_3859       | c4188          | yhgA        | hypothetical protein                         |
| i02_3861       | c4190          | yhgH        | gluconate periplasmic binding protein        |
| i02_3860       | c4189          | bioH        | carboxylesterase BioH                        |
| i02_3862       | c4191          | yhgI        | putative DNA uptake protein                  |
| i02_3863       | c4192          | gntT        | high-affinity gluconate transporter          |
| i02_3864       | c4193          | malQ        | 4-alpha-glucanotransferase                   |
| i02_3865       | c4194          | malP        | maltodextrin phosphorylase                   |
| i02_3866       | c4195          | /           | hypothetical protein                         |
| i02_3867       | c4196          | malT        | transcriptional regulator MalT               |
| i02_3868       | c4197          | /           | RNA 3'-terminal-phosphate cyclase            |
| i02_3869       | c4198          | rtcB        | protein rtcB                                 |
| i02_3870       | c4199          | rtcR        | transcriptional regulatory protein rtcR      |
| i02_3872       | c4200          | glpR        | DNA-binding transcriptional repressor GlpR   |
| i02_3873       | c4201          | glpG        | intramembrane serine protease GlpG           |
| i02_3874       | c4202          | glpE        | thiosulfate sulfurtransferase                |
| i02_3875       | c4203          | glpD        | glycerol-3-phosphate dehydrogenase           |
| i02_3876       | c4204          | /           | hypothetical protein                         |
| i02_3877       | c4205          | /           | hypothetical protein                         |
| i02_3878       | c4206          | /           | hypothetical protein                         |
| i02_3879       | c4207          | /           | putative fimbrial adhesin precursor          |
| i02_3880       | c4208          | /           | putative fimbrial chaperone precursor        |
| i02_3881       | c4209          | /           | putative minor fimbrial subunit precursor    |
|                | c4211          | /           | hypothetical protein                         |
| i02_3882       | c4210          | /           | putative minor fimbrial subunit precursor    |
| i02_3883       | c4212          | ycbS        | outer membrane usher protein ycbS precursor  |
| i02_3884       | c4213          | /           | chaperone protein fimC precursor             |
| i02_3885       | c4214          | /           | putative major fimbrial subunit precursor    |
| i02_3886       | c4215          | glgP        | glycogen phosphorylase                       |
| i02_3887       | c4216          | glgA        | glycogen synthase                            |
| i02_3888       | c4217          | glgC        | glucose-1-phosphate adenyltransferase        |
| i02_3889       | c4218          | glgX        | glycogen debranching enzyme                  |

| <b>Clone D</b> | <b>CFT 073</b> | <b>Gene</b> | <b>Product</b>                                         |
|----------------|----------------|-------------|--------------------------------------------------------|
| i02_3890       | c4219          | glgB        | glycogen branching enzyme                              |
| i02_3891       | c4220          | asd         | aspartate-semialdehyde dehydrogenase                   |
| i02_3892       | c4221          | yhgN        | putative dTTP- and XTP- hydrolase                      |
| i02_3893       | c4222          | /           | putative DNA processing protein                        |
| i02_3894       | c4223          | /           | hypothetical protein                                   |
| i02_3895       | c4224          | gntU        | low affinity gluconate transporter                     |
|                | c4226          | /           | hypothetical protein                                   |
| i02_3896       | c4225          | gntK        | gluconate kinase 1                                     |
| i02_3897       | c4227          | gntR        | gluconate utilization system GNT-I                     |
| i02_3898       | c4228          | yhhW        | hypothetical protein                                   |
| i02_3900       | c4230          | /           | hypothetical protein                                   |
| i02_3899       | c4229          | yhhX        | putative dehydrogenase                                 |
| i02_3901       |                | /           | hypothetical protein                                   |
| i02_3902       |                | yhhY        | putative acetyltransferase YhhY                        |
| i02_3903       | c4233          | yhhZ        | hypothetical protein                                   |
| i02_3904       | c4234          | yrhA        | hypothetical protein                                   |
| i02_3905       | c4235          | yrhB        | hypothetical protein                                   |
| i02_3906       | c4236          | ggt         | gamma-glutamyltranspeptidase                           |
| i02_3907       | c4237          | yhhA        | hypothetical protein                                   |
| i02_3908       | c4238          | ugpQ        | cytoplasmic glycerophosphodiester                      |
| i02_3909       | c4239          | ugpC        | glycerol-3-phosphate transporter ATP-binding component |
| i02_3910       | c4240          | ugpE        | glycerol-3-phosphate transporter membrane component    |
| i02_3911       | c4241          | ugpA        | glycerol-3-phosphate transporter permease component    |
| i02_3912       | c4242          | ugpB        | glycerol-3-phosphate transporter periplasmic component |
| i02_3913       | c4243          | /           | hypothetical protein                                   |
| i02_3914       | c4244          | livF        | leucine/isoleucine/valine transporter                  |
| i02_3915       | c4245          | livG        | leucine/isoleucine/valine transporter                  |
| i02_3916       | c4246          | livM        | leucine/isoleucine/valine transporter permease         |
| i02_3917       | c4247          | livH        | branched-chain amino acid transporter permease         |
| i02_3919       | c4249          | /           | hypothetical protein                                   |
| i02_3918       | c4248          | livK        | leucine-specific binding protein precursor             |
| i02_3920       | c4250          | /           | hypothetical protein                                   |
| i02_3921       | c4251          | yhhK        | hypothetical protein                                   |
| i02_3922       | c4252          | /           | hypothetical protein                                   |
| i02_3923       | c4253          | livJ        | Leu/Ile/Val-binding protein precursor                  |
| i02_3924       | c4254          | rpoH        | RNA polymerase factor sigma-32                         |
| i02_3925       | c4255          | ftsX        | cell division protein FtsX                             |
| i02_3926       | c4256          | ftsE        | cell division protein FtsE                             |
| i02_3927       | c4257          | ftsY        | cell division protein FtsY                             |
| i02_3928       | c4258          | rsmD        | 16S rRNA m(2)G966-methyltransferase                    |
| i02_3929       | c4259          | yhhL        | hypothetical protein                                   |
| i02_3930       | c4260          | yhhM        | hypothetical protein                                   |
| i02_3931       | c4261          | yhhN        | hypothetical protein                                   |
| i02_3932       | c4262          | zntA        | zinc/cadmium/mercury/lead-transporting ATPase          |
| i02_3933       | c4263          | yhhP        | sulfur transfer protein SirA                           |
| i02_3934       | c4264          | yhhQ        | hypothetical protein                                   |
| i02_3935       | c4265          | /           | hypothetical protein                                   |
| i02_3936       | c4266          | yhhS        | major facilitator superfamily transporter              |

| <b>Clone D</b> | <b>CFT 073</b> | <b>Gene</b> | <b>Product</b>                                |
|----------------|----------------|-------------|-----------------------------------------------|
| i02_3937       | c4267          | yhhT        | hypothetical protein                          |
| i02_3938       | c4268          | yhhU        | holo-(acyl carrier protein) synthase 2        |
| i02_3939       | c4269          | nikA        | nickel-binding periplasmic protein precursor  |
| i02_3940       | c4270          | nikB        | nickel transporter permease NikB              |
| i02_3941       | c4271          | nikC        | nickel transporter permease NikC              |
| i02_3942       | c4272          | nikD        | nickel transporter ATP-binding protein NikD   |
| i02_3943       | c4273          | nikE        | nickel transporter ATP-binding protein NikE   |
| i02_3944       | c4274          | yhhG        | nickel responsive regulator                   |
|                | c4275          | /           | hypothetical protein                          |
| i02_3946       | c4276          | /           | putative regulator                            |
| i02_3947       | c4277          | /           | putative phosphotransferase system enzyme     |
| i02_3948       | c4278          | /           | putative phosphotransferase system enzyme     |
| i02_3949       | c4279          | /           | PTS system, galactitol-specific IIC component |
| i02_3950       | c4280          | /           | putative xylulose kinase                      |
| i02_3950       | c4282          | /           | hypothetical protein                          |
| i02_3952       | c4283          | /           | putative phosphocarrier protein               |
| i02_3951       | c4281          | /           | hypothetical protein                          |
| i02_3953       | c4284          | gatY        | putative fructose-1,6-bisphosphate aldolase   |
| i02_3954       | c4285          | yhhJ        | hypothetical protein                          |
| i02_3955       | c4286          | yhiH        | ABC transporter ATP-binding protein           |
| i02_3956       | c4287          | yhiI        | hypothetical protein                          |
| i02_3957       | c4288          | /           | hypothetical protein                          |
| i02_3958       | c4289          | yhiM        | hypothetical protein                          |
| i02_3959       | c4290          | yhiN        | hypothetical protein                          |
| i02_3960       | c4291          | pitA        | inorganic phosphate transporter               |
| i02_3961       | c4292          | yhiO        | universal stress protein UspB                 |
| i02_3962       | c4293          | uspA        | universal stress protein A                    |
| i02_3964       | c4295          | yhiP        | inner membrane transporter YhiP               |
| i02_3963       | c4294          | /           | hypothetical protein                          |
| i02_3965       | c4296          | yhiQ        | putative methyltransferase                    |
| i02_3966       | c4297          | prfC        | oligopeptidase A                              |
| i02_3967       | c4298          | yhiR        | hypothetical protein                          |
| i02_3968       | c4299          | gor         | glutathione reductase                         |
| i02_3969       | c4300          | /           | hypothetical protein                          |
| i02_3970       | c4301          | arsC        | arsenate reductase                            |
| i02_3971       | c4302          | /           | hypothetical protein                          |
| i02_3972       | c4303          | /           | hypothetical protein                          |
| i02_3973       | c4304          | slp         | Outer membrane protein Slp precursor          |
| i02_3974       | c4305          | /           | hypothetical protein                          |
| i02_3975       | c4306          | yhiF        | putative transcriptional regulator YhiF       |
| i02_3976       | c4307          | chuS        | putative heme/hemoglobin transport protein    |
| i02_3978       | c4309          | /           | hypothetical protein                          |
| i02_3977       | c4308          | chuA        | Outer membrane heme/hemoglobin receptor       |
| i02_3979       | c4310          | /           | hypothetical protein                          |
| i02_3980       | c4311          | /           | hypothetical protein                          |
|                | c4312          | /           | hypothetical protein                          |
| i02_3981       | c4313          | chuT        | putative periplasmic binding protein          |
| i02_3982       | c4314          | chuW        | coproporphyrinogen III oxidase                |
| i02_3983       | c4315          | chuX        | hypothetical protein                          |
| i02_3984       | c4316          | chuY        | hypothetical protein                          |
| i02_3985       | c4317          | chuU        | iron ABC transporter permease                 |
| i02_3986       | c4318          | hmuV        | hemin importer ATP-binding subunit            |

| <b>Clone D</b> | <b>CFT 073</b> | <b>Gene</b> | <b>Product</b>                             |
|----------------|----------------|-------------|--------------------------------------------|
| i02_3987       | c4319          | yhiD        | putative Mg(2+) transport ATPase           |
| i02_3988       | c4320          | hdeB        | acid-resistance protein                    |
| i02_3989       | c4321          | hdeA        | acid-resistance protein                    |
| i02_3990       | c4322          | hdeD        | acid-resistance membrane protein           |
| i02_3991       | c4323          | yhiE        | hypothetical protein                       |
| i02_3992       |                | /           | hypothetical protein                       |
| i02_3993       | c4324          | yhiU        | multidrug efflux system protein MdtE       |
| i02_3994       | c4325          | yhiV        | hypothetical protein                       |
| i02_3995       | c4326          | yhiW        | putative transcriptional regulator YhiW    |
| i02_3996       | c4327          | yhiX        | DNA-binding transcriptional regulator GadX |
| i02_3997       | c4328          | gadA        | glutamate decarboxylase alpha              |
| i02_3998       | c4329          | yhjA        | cytochrome C peroxidase                    |
| i02_3999       | c4330          | treF        | trehalase                                  |
| i02_4000       | c4331          | yhjB        | putative transcriptional regulator YhjB    |
| i02_4001       |                | /           | conserved hypothetical protein             |
| i02_4002       | c4332          | yhjC        | putative transcriptional regulator YhjC    |
| i02_4003       | c4333          | yhjD        | hypothetical protein                       |
| i02_4004       | c4334          | yhjE        | metabolite transport protein               |
| i02_4005       | c4335          | yhjG        | hypothetical protein                       |
| i02_4007       | c4337          | kdgK        | 2-dehydro-3-deoxygluconokinase             |
| i02_4006       | c4336          | yhjH        | EAL domain-containing protein              |
| i02_4008       | c4339          | yhjJ        | hypothetical protein                       |
| i02_4009       | c4340          | dctA        | C4-dicarboxylate transporter DctA          |
| i02_4010       | c4341          | yhjK        | putative phosphodiesterase                 |
| i02_4011       | c4342          | yhjL        | cellulose synthase subunit BcsC            |
| i02_4012       | c4343          | yhjM        | endo-1,4-D-glucanase                       |
| i02_4013       | c4344          | yhjN        | cellulose synthase regulator protein       |
| i02_4014       | c4345          | bcsA        | cellulose synthase catalytic subunit       |
| i02_4015       | c4346          | yhjQ        | cell division protein                      |
| i02_4016       | c4347          | yhjR        | hypothetical protein                       |
| i02_4017       | c4348          | yhjS        | hypothetical protein                       |
| i02_4018       | c4349          | yhjT        | hypothetical protein                       |
| i02_4019       | c4350          | yhjU        | hypothetical protein                       |
| i02_4020       | c4351          | /           | hypothetical protein                       |
| i02_4021       | c4352          | /           | hypothetical protein                       |
| i02_4023       |                | /           | hypothetical protein                       |
| i02_4024       | c4353          | /           | hypothetical protein                       |
| i02_4025       | c4354          | yhjV        | putative transport protein YhjV            |
| i02_4026       | c4355          | dppF        | dipeptide transporter ATP-binding subunit  |
| i02_4027       | c4356          | dppD        | dipeptide transporter ATP-binding subunit  |
| i02_4028       | c4357          | dppC        | dipeptide transporter                      |
| i02_4029       | c4358          | dppB        | dipeptide transporter permease DppB        |
| i02_4030       | c4361          | dppA        | periplasmic dipeptide transport protein    |
| i02_4031       |                | /           | Hypothetical protein c4363                 |
| i02_4032       | c4364          | yhjW        | phosphoethanolamine transferase            |
| i02_4033       | c4365          | yhjX        | hypothetical protein                       |
| i02_4034       | c4366          | yhjY        | hypothetical protein                       |
| i02_4035       | c4367          | tag         | 3-methyl-adenine DNA glycosylase I         |
| i02_4036       | c4368          | yiaC        | hypothetical protein                       |
| i02_4037       | c4369          | bisC        | biotin sulfoxide reductase                 |
| i02_4038       | c4370          | yiaD        | putative outer membrane lipoprotein        |
|                | c4371          | /           | hypothetical protein                       |

| <b>Clone D</b> | <b>CFT 073</b> | <b>Gene</b> | <b>Product</b>                                   |
|----------------|----------------|-------------|--------------------------------------------------|
| i02_4039       | c4372          | yiaE        | 2-hydroxyacid dehydrogenase                      |
| i02_4040       | c4373          | yiaF        | hypothetical protein                             |
| i02_4041       | c4374          | /           | hypothetical protein                             |
| i02_4042       | c4375          | /           | putative transcriptional regulator               |
|                | c4376          | /           | hypothetical protein                             |
| i02_4043       | c4377          | cspA        | major cold shock protein                         |
| i02_4044       |                | /           | small toxic polypeptide                          |
| i02_4045       | c4378          | glyS        | glycyl-tRNA synthetase subunit beta              |
| i02_4046       | c4379          | glyQ        | glycyl-tRNA synthetase subunit alpha             |
| i02_4047       | c4380          | /           | hypothetical protein                             |
| i02_4048       | c4381          | yiaH        | hypothetical protein                             |
| i02_4049       | c4382          | yiaA        | hypothetical protein                             |
| i02_4050       | c4383          | yiaB        | hypothetical protein                             |
| i02_4051       | c4384          | xylB        | xylulokinase                                     |
| i02_4052       | c4385          | xylA        | xylose isomerase                                 |
| i02_4053       | c4386          | xylF        | D-xylose transporter subunit XylF                |
| i02_4054       | c4387          | xylG        | xylose transporter ATP-binding subunit           |
| i02_4055       | c4388          | xylH        | xylose transport system permease protein xylH    |
| i02_4056       | c4389          | xylR        | xylose operon regulatory protein                 |
| i02_4057       | c4390          | bax         | hypothetical protein                             |
| i02_4058       | c4391          | /           | hypothetical protein                             |
| i02_4059       | c4392          | malS        | periplasmic alpha-amylase precursor              |
| i02_4060       | c4393          | avtA        | valine--pyruvate transaminase                    |
| i02_4061       | c4394          | yiaI        | putative electron transport protein ysaA         |
| i02_4062       | c4395          | yiaJ        | putative transcriptional regulator YiaJ          |
| i02_4063       | c4396          | yiaK        | 2,3-diketo-L-gulonate reductase                  |
| i02_4064       | c4397          | yiaL        | hypothetical protein                             |
| i02_4065       | c4398          | /           | hypothetical protein                             |
| i02_4066       | c4399          | yiaM        | 2,3-diketo-L-gulonate TRAP transporter           |
| i02_4067       | c4400          | yiaN        | hypothetical protein                             |
|                | c4401          | /           | hypothetical protein                             |
| i02_4068       | c4402          | yiaO        | ABC transporter periplasmic-binding protein      |
| i02_4069       | c4403          | lyxK        | Cryptic L-xylulose kinase                        |
| i02_4070       | c4404          | sgbH        | 3-keto-L-gulonate-6-phosphate decarboxylase      |
| i02_4071       | c4405          | sgbU        | putative L-xylulose 5-phosphate 3-epimerase      |
| i02_4072       | c4406          | sgbE        | L-ribulose-5-phosphate 4-epimerase               |
|                | c4407          | /           | hypothetical protein                             |
| i02_4073       | c4408          | aldB        | aldehyde dehydrogenase B                         |
| i02_4074       | c4409          | /           | hypothetical protein                             |
| i02_4075       | c4410          | yiaY        | putative alcohol dehydrogenase                   |
| i02_4076       | c4411          | selB        | selenocysteinyl-tRNA-specific translation factor |
| i02_4077       | c4412          | selA        | selenocysteine synthase                          |
| i02_4078       | c4413          | yibF        | putative glutathione S-transferase               |
| i02_4079       | c4414          | yibH        | hypothetical protein                             |
| i02_4080       | c4415          | yibI        | hypothetical protein                             |
| i02_4081       | c4416          | mtlA        | PTS system, mannitol-specific IIABC component    |
| i02_4082       | c4417          | mtlD        | mannitol-1-phosphate 5-dehydrogenase             |
| i02_4083       | c4418          | mtlR        | mannitol repressor protein                       |
| i02_4084       | c4419          | /           | hypothetical protein                             |
|                | c4420          | /           | hypothetical protein                             |
| i02_4085       | c4421          | yibL        | hypothetical protein                             |
| i02_4086       | c4422          | /           | hypothetical protein                             |



| <b>Clone D</b> | <b>CFT 073</b> | <b>Gene</b> | <b>Product</b>                               |
|----------------|----------------|-------------|----------------------------------------------|
| i02_4087       | c4423          | /           | hypothetical protein                         |
| i02_4088       | c4424          | /           | putative adhesin                             |
| i02_4089       | c4425          | lIdP        | L-lactate permease                           |
| i02_4090       | c4426          | lIdR        | DNA-binding transcriptional repressor LIdR   |
| i02_4091       | c4427          | lIdD        | L-lactate dehydrogenase                      |
| i02_4092       | c4428          | yibK        | putative tRNA/rRNA methyltransferase YibK    |
| i02_4093       | c4429          | cysE        | serine acetyltransferase                     |
| i02_4095       | c4431          | /           | hypothetical protein                         |
| i02_4094       | c4430          | gpsA        | NAD(P)H-dependent glycerol-3-phosphate       |
| i02_4096       | c4432          | secB        | preprotein translocase subunit SecB          |
| i02_4098       | c4434          | /           | hypothetical protein                         |
| i02_4097       | c4433          | grxC        | glutaredoxin 3                               |
|                | c4435          | /           | hypothetical protein                         |
| i02_4099       | c4436          | yibN        | hypothetical protein                         |
| i02_4100       | c4437          | /           | hypothetical protein                         |
| i02_4101       | c4438          | yibO        | phosphoglyceromutase                         |
| i02_4102       | c4439          | yibP        | hypothetical protein                         |
| i02_4103       | c4440          | yibQ        | hypothetical protein                         |
| i02_4104       | c4441          | yibD        | putative glycosyl transferase                |
|                | c4442          | /           | hypothetical protein                         |
| i02_4105       | c4443          | tdh         | L-threonine 3-dehydrogenase                  |
| i02_4106       | c4444          | kbl         | 2-amino-3-ketobutyrate coenzyme A ligase     |
| i02_4107       | c4445          | rfaD        | ADP-L-glycero-D-mannoheptose-6-epimerase     |
| i02_4108       | c4446          | rfaF        | ADP-heptose:LPS heptosyltransferase II       |
| i02_4109       | c4447          | rfaC        | ADP-heptose:LPS heptosyl transferase I       |
| i02_4110       | c4448          | waaL        | Lipid A-core, surface polymer ligase         |
| i02_4111       | c4449          | waaV        | putative beta1,3-glucosyltransferase         |
| i02_4112       | c4450          | waaW        | UDP-galactose:(galactosyl) LPS               |
| i02_4113       | c4451          | rfaY        | lipopolysaccharide core biosynthesis protein |
| i02_4114       | c4452          | rfaJ        | lipopolysaccharide 1,2-glucosyltransferase   |
| i02_4115       | c4453          | rfaI        | lipopolysaccharide 1,3-galactosyltransferase |
| i02_4116       | c4454          | rfaP        | lipopolysaccharide core biosynthesis protein |
| i02_4117       | c4455          | rfaG        | lipopolysaccharide core biosynthesis protein |
| i02_4118       | c4456          | rfaQ        | lipopolysaccharide core biosynthesis protein |
| i02_4119       | c4457          | kdtA        | 3-deoxy-D-manno-octulosonic-acid transferase |
| i02_4120       | c4458          | coaD        | phosphopantetheine adenylyltransferase       |
| i02_4121       | c4459          | mutM        | formamidopyrimidine-DNA glycosylase          |
| i02_4122       | c4460          | rpmG        | 50S ribosomal protein L33                    |
| i02_4123       | c4461          | rpmB        | 50S ribosomal protein L28                    |
| i02_4124       | c4462          | radC        | DNA repair protein RadC                      |
| i02_4125       | c4463          | dfp         | bifunctional phosphopantothenoylcysteine     |
| i02_4126       | c4464          | dut         | deoxyuridine triphosphatase                  |
| i02_4127       | c4465          | slmA        | nucleoid occlusion protein                   |
| i02_4128       | c4466          | pyrE        | orotate phosphoribosyltransferase            |
| i02_4129       | c4467          | rph         | ribonuclease PH                              |
| i02_4130       | c4468          | yicC        | hypothetical protein                         |
| i02_4131       | c4469          | dinD        | DNA-damage-inducible protein D               |
| i02_4132       | c4470          | yicG        | hypothetical protein                         |
| i02_4133       | c4471          | ligB        | NAD-dependent DNA ligase LigB                |
| i02_4134       | c4472          | /           | hypothetical protein                         |
| i02_4135       | c4473          | gmk         | guanylate kinase                             |
| i02_4136       | c4474          | rpoZ        | DNA-directed RNA polymerase subunit omega    |

| <b>Clone D</b> | <b>CFT 073</b> | <b>Gene</b> | <b>Product</b>                               |
|----------------|----------------|-------------|----------------------------------------------|
| i02_4137       | c4475          | spoT        | bifunctional (p)ppGpp synthetase II          |
| i02_4138       | c4476          | spoU        | tRNA guanosine-2'-O-methyltransferase        |
| i02_4139       | c4477          | recG        | ATP-dependent DNA helicase RecG              |
| i02_4140       | c4478          | gltS        | Sodium/glutamate symport carrier protein     |
| i02_4141       | c4479          | yicE        | putative purine permease yicE                |
| i02_4142       | c4480          | yicH        | hypothetical protein                         |
| i02_4143       | c4481          | /           | hypothetical protein                         |
| i02_4144       | c4482          | /           | hypothetical protein                         |
| i02_4145       | c4483          | /           | hypothetical protein                         |
| i02_4146       | c4484          | /           | putative aldolase                            |
| i02_4147       | c4485          | /           | putative PTS enzyme-II fructose              |
| i02_4148       | c4486          | /           | PTS system, fructose-like-2 IIB component 1  |
| i02_4149       | c4487          | /           | putative phosphotransferase system (PTS),    |
| i02_4150       | c4488          | /           | putative transcriptional antiterminator      |
| i02_4151       |                | /           | hypothetical protein                         |
| i02_4152       | c4489          | yicI        | alpha-xylosidase YicI                        |
| i02_4153       | c4490          | yicJ        | putative transporter                         |
| i02_4154       | c4491          | intC        | putative prophage integrase                  |
| i02_4155       | -              | /           | conserved hypothetical protein               |
| i02_4156       | -              | /           | conserved hypothetical protein               |
| i02_4157       | -              | /           | conserved hypothetical protein               |
| i02_4158       | -              | /           | hexuronate transporter                       |
| i02_4159       | -              | /           | small GTP-binding domain protein             |
| i02_4160       | -              | /           | conserved hypothetical protein               |
| i02_4161       | -              | /           | hypothetical protein                         |
| i02_4162       | -              | /           | hypothetical protein                         |
| i02_4164       | -              | /           | hypothetical protein                         |
| i02_4163       | -              | /           | conserved hypothetical protein               |
| i02_4165       | -              | /           | DNA repair protein RadC                      |
| i02_4166       | -              | /           | hypothetical protein                         |
| i02_4167       | -              | /           | ATP binding protein                          |
| i02_4168       | -              | /           | conserved hypothetical protein               |
| i02_4169       | -              | /           | hypothetical protein                         |
| i02_4170       | -              | /           | hypothetical protein                         |
| i02_4171       | -              | /           | hypothetical protein                         |
| -              | c4492          | /           | ShiA-like protein                            |
| -              | c4493          | /           | hypothetical protein                         |
| -              | c4494          | /           | putative transcriptional regulator           |
| -              | c4495          |             | hexuronate transporter                       |
| -              | c4496          | /           | putative glucosidase                         |
| -              | c4497          | /           | putative glucosidase                         |
| -              | c4498          | /           | IS1 protein InsB                             |
| -              | c4499          | /           | hypothetical protein                         |
| -              | c4500          | /           | putative amino acid antiporter               |
| -              | c4501          | /           | hypothetical protein                         |
| -              | c4502          | /           | putative antiporter                          |
| -              | c4503          | /           | insertion element IS1 1/2/3/5/6 protein insA |
| -              | c4504          | insB        | insertion element IS1 1/5/6 protein insB     |
| -              | c4505          | /           | hypothetical protein                         |
| -              | c4506          | insI        | transposase insI                             |
| -              | c4507          |             | transposase insF                             |
| -              | c4508          | /           | hypothetical protein                         |

| Clone D | CFT 073 | Gene | Product                               |
|---------|---------|------|---------------------------------------|
| -       | c4509   | /    | hypothetical protein                  |
| -       | c4510   | /    | hypothetical protein                  |
| -       | c4511   | /    | hypothetical protein                  |
| -       | c4512   | /    | hypothetical protein                  |
| -       | c4513   | /    | hypothetical protein                  |
| -       | c4514   | /    | hypothetical protein                  |
| -       | c4517   | /    | hypothetical protein                  |
| -       | c4518   | /    | hypothetical protein                  |
| -       | c4519   | /    | hypothetical protein                  |
| -       | c4520   | /    | hypothetical protein                  |
| -       | c4521   | /    | hypothetical protein                  |
| -       | c4522   | /    | hypothetical protein                  |
| -       | c4523   | /    | hypothetical protein                  |
| -       | c4524   | /    | putative propanol dehydrogenase       |
| -       | c4525   | /    | putative chormophorylate of CpcA      |
| -       | c4526   | /    | ethanolamine utilization protein eutJ |
| -       | c4527   | /    | hypothetical protein                  |
| -       | c4528   | /    | ethanolamine utilization protein eutN |
| -       | c4529   | /    | hypothetical protein                  |
| -       | c4530   | tdcD | propionate/acetate kinase             |
| -       | c4531   | /    | hypothetical protein                  |
| -       | c4532   | /    | hypothetical protein                  |
| -       | c4533   | /    | putative pduB protein                 |
| -       | c4534   | /    | ethanolamine utilization protein eutE |
| -       | c4535   | /    | hypothetical protein                  |
| -       | c4536   | /    | hypothetical protein                  |
| -       | c4537   | /    | hypothetical protein                  |
| -       | c4538   | /    | putative pyruvate formate-lyase       |
| -       | c4539   | /    | hypothetical protein                  |
| -       | c4540   | /    | putative maturase-related protein     |
| -       | c4541   | /    | putative maturase-related protein     |
| -       | c4542   | /    | hypothetical protein                  |
| -       | c4543   | /    | hypothetical protein                  |
| -       | c4544   | /    | hypothetical protein                  |
| -       | c4545   | /    | hypothetical protein                  |
| -       | c4546   | /    | hypothetical protein                  |
| -       | c4547   | /    | S-adenosylmethionine synthetase       |
| -       | c4548   | /    | hypothetical protein                  |
| -       | c4549   | /    | hypothetical protein                  |
| -       | c4550   | /    | hypothetical protein                  |
| -       | c4551   | /    | hypothetical protein                  |
| -       | c4552   | /    | transposase insC                      |
| -       | c4556   | /    | hypothetical protein                  |
| -       | c4557   | /    | hypothetical protein                  |
| -       | c4558   | /    | hypothetical protein                  |
| -       | c4559   | /    | hypothetical protein                  |
| -       | c4560   | /    | hypothetical protein                  |
| -       | c4562   | /    | hypothetical protein                  |
| -       | c4561   | /    | hypothetical protein                  |
| -       | c4563   | /    | hypothetical protein                  |
| -       | c4564   | /    | hypothetical protein                  |
| -       | c4565   | /    | hypothetical protein                  |

| Clone D  | CFT 073 | Gene | Product                                         |
|----------|---------|------|-------------------------------------------------|
| -        | c4566   | /    | putative transcriptional regulator YfjR         |
| -        | c4567   | /    | hypothetical protein                            |
| -        | c4568   | /    | hypothetical protein                            |
| -        | c4569   | /    | hypothetical protein                            |
| -        | c4570   | /    | hypothetical protein                            |
| -        | c4571   | /    | hypothetical protein                            |
| -        | c4572   | /    | hypothetical protein                            |
| -        | c4573   | /    | putative radC-like protein yeeS                 |
| -        | c4574   | /    | hypothetical protein                            |
| -        | c4575   | /    | hypothetical protein                            |
| -        | c4576   | /    | hypothetical protein                            |
| -        | c4577   | /    | hypothetical protein                            |
| -        | c4578   | /    | hypothetical protein                            |
| -        | c4579   | /    | hypothetical protein                            |
| i02_4172 | c4580   | /    | hypothetical protein                            |
| i02_4173 | c4581   | /    | hypothetical protein                            |
| i02_4174 | c4582   | yicL | putative transport protein YicL                 |
| i02_4175 | c4583   | nlpA | cytoplasmic membrane lipoprotein-28             |
| i02_4176 | c4584   | /    | hypothetical protein                            |
| i02_4177 | c4585   | /    | hypothetical protein                            |
| i02_4178 | c4586   | nepl | ribonucleoside transporter                      |
| i02_4179 | c4587   | yicN | hypothetical protein                            |
| i02_4180 | c4588   | yicO | hypothetical protein                            |
| i02_4181 | c4589   | yicP | cryptic adenine deaminase                       |
| i02_4182 | c4590   | uhpT | sugar phosphate antiporter                      |
| i02_4183 | c4591   | uhpC | regulatory protein UhpC                         |
| i02_4184 | c4592   | uhpB | sensory histidine kinase UhpB                   |
| i02_4185 | c4593   | uhpA | DNA-binding transcriptional activator UhpA      |
| i02_4186 | c4594   | /    | hypothetical protein                            |
| i02_4187 | c4595   | ilvN | acetolactate synthase 1 regulatory subunit      |
| i02_4189 |         | /    | hypothetical protein                            |
| i02_4188 | c4596   | ilvB | acetolactate synthase catalytic subunit         |
|          | c5498   | ivbL | ilvB operon leader peptide                      |
| i02_4190 | c4597   | emrD | multidrug resistance protein D                  |
| i02_4191 | c4598   | yidF | hypothetical protein                            |
| i02_4192 | c4599   | yidG | hypothetical protein                            |
| i02_4193 | c4600   | yidH | hypothetical protein                            |
| i02_4194 | c4601   | yidJ | putative sulfatase yidJ                         |
| i02_4195 | c4602   | yidK | putative symporter YidK                         |
| i02_4196 | c4603   | yidL | putative transcriptional regulator YidL         |
| i02_4197 | c4604   | yidE | hypothetical protein                            |
| i02_4198 | c4605   | /    | hypothetical protein                            |
| i02_4199 | c4606   | ibpB | heat shock chaperone IbpB                       |
| i02_4200 | c4607   | ibpA | heat shock protein IbpA                         |
| i02_4201 | c4608   | yidQ | hypothetical protein                            |
| i02_4203 | c4610   | /    | hypothetical protein                            |
| i02_4202 | c4609   | yidR | hypothetical protein                            |
| i02_4204 | c4611   | yidS | putative oxidoreductase                         |
| i02_4205 | c4612   | dgoT | D-galactonate transporter                       |
| i02_4206 |         | rspA | starvation sensing protein rspA                 |
| i02_4207 |         | dgoA | 2-dehydro-3-deoxy-6-phosphogalactonate aldolase |

| <b>Clone D</b> | <b>CFT 073</b> | <b>Gene</b> | <b>Product</b>                                      |
|----------------|----------------|-------------|-----------------------------------------------------|
| i02_4208       | c4615          | dgoK        | 2-dehydro-3-deoxygalactonokinase                    |
| i02_4209       | c4616          | /           | hypothetical protein                                |
| i02_4210       | c4617          | /           | hypothetical protein                                |
| i02_4210       | c4618          | /           | hypothetical protein                                |
| i02_4212       | c4619          | yidA        | sugar phosphatase                                   |
| i02_4213       | c4620          | yidB        | hypothetical protein                                |
| i02_4214       | c4621          | gyrB        | DNA gyrase subunit B                                |
| i02_4215       | c4622          | recF        | recombination protein F                             |
| i02_4216       | c4623          | dnaN        | DNA polymerase III subunit beta                     |
| i02_4217       |                | yfgE        | DNA replication initiation factor                   |
| i02_4218       | c4626          | /           | hypothetical protein                                |
| i02_4219       | c4627          | rpmH        | 50S ribosomal protein L34                           |
| i02_4220       | c4628          | rnpA        | ribonuclease P                                      |
| i02_4221       | c4629          | yidC        | putative inner membrane protein translocase         |
| i02_4222       | c4630          | trmE        | tRNA modification GTPase TrmE                       |
| i02_4223       | c5499          | tnaL        | tryptophanase leader peptide                        |
| i02_4224       | c4631          | tnaA        | tryptophanase                                       |
| i02_4225       | c4632          | tnaB        | tryptophan permease TnaB                            |
| i02_4226       | c4633          | yidY        | multidrug efflux system protein MdtL                |
| i02_4227       | c4634          | yidZ        | DNA-binding transcriptional regulator YidZ          |
| i02_4228       | c4635          | yieE        | hypothetical protein                                |
| i02_4229       | c4636          | yieF        | hypothetical protein                                |
| i02_4230       | c4637          | yieG        | hypothetical protein                                |
| i02_4231       | c4638          | yieH        | 6-phosphogluconate phosphatase                      |
| i02_4232       | c4639          | yieI        | putative inner membrane protein                     |
| i02_4233       | c4640          | yieK        | putative 6-phosphogluconolactonase                  |
| i02_4234       | c4641          | yieL        | hypothetical protein                                |
| i02_4235       | c4642          | /           | hypothetical protein                                |
| i02_4236       | c4643          | bglB        | 6-phospho-beta-glucosidase bglB                     |
|                | c4645          | /           | hypothetical protein                                |
| i02_4237       | c4644          | bglF        | beta-glucoside-specific PTS system components       |
| i02_4239       | c4646          | bglG        | transcriptional antiterminator BglG                 |
| i02_4240       | c4647          | /           | hypothetical protein                                |
| i02_4241       | c4648          | phoU        | transcriptional regulator PhoU                      |
|                | c4650          | /           | hypothetical protein                                |
| i02_4242       | c4649          | pstB        | phosphate transporter subunit                       |
| i02_4243       | c4651          | pstA        | phosphate transporter permease subunit PtsA         |
| i02_4244       | c4652          | pstC        | phosphate transporter permease subunit PstC         |
| i02_4245       | c4653          | pstS        | phosphate ABC transporter periplasmic               |
| i02_4246       | c4654          | glmS        | L-glutamine:D-fructose-6-phosphate aminotransferase |
| i02_4247       | c4655          | glmU        | glucosamine uridylyltransferase                     |
|                | c4656          | /           | hypothetical protein                                |
| i02_4249       | c4657          | atpC        | F0F1 ATP synthase subunit epsilon                   |
| i02_4250       | c4658          | atpD        | F0F1 ATP synthase subunit beta                      |
| i02_4251       | c4659          | atpG        | F0F1 ATP synthase subunit gamma                     |
|                | c4661          | /           | hypothetical protein                                |
| i02_4252       | c4660          | atpA        | F0F1 ATP synthase subunit alpha                     |
| i02_4254       | c4663          | /           | hypothetical protein                                |
| i02_4253       | c4662          | atpH        | F0F1 ATP synthase subunit delta                     |
| i02_4255       | c4664          | atpF        | F0F1 ATP synthase subunit B                         |
| i02_4256       | c4665          | atpE        | F0F1 ATP synthase subunit C                         |

| <b>Clone D</b> | <b>CFT 073</b> | <b>Gene</b> | <b>Product</b>                                  |
|----------------|----------------|-------------|-------------------------------------------------|
| i02_4257       | c4666          | atpB        | F0F1 ATP synthase subunit A                     |
| i02_4258       | c4667          | atpI        | F0F1 ATP synthase subunit I                     |
| i02_4259       | c4668          | gidB        | 16S rRNA methyltransferase GidB                 |
| i02_4260       | c4669          | gidA        | protein involved in a tRNA modification pathway |
| i02_4261       | c4670          | mioC        | flavodoxin                                      |
| i02_4262       | c4671          | asnC        | DNA-binding transcriptional regulator AsnC      |
| i02_4263       | c4672          | asnA        | asparagine synthetase AsnA                      |
| i02_4264       | c4673          | yieM        | hypothetical protein                            |
| i02_4265       | c4674          | yieN        | regulatory ATPase RavA                          |
| i02_4266       | c4675          | trkD        | potassium transport protein Kup                 |
| i02_4267       | c4676          | rbsD        | D-ribose pyranase                               |
| i02_4268       | c4677          | rbsA        | D-ribose transporter ATP binding protein        |
| i02_4269       | c4678          | rbsC        | ribose ABC transporter permease protein         |
| i02_4270       | c4679          | rbsB        | D-ribose transporter subunit RbsB               |
| i02_4271       | c4680          | rbsK        | ribokinase                                      |
| i02_4272       | c4681          | rbsR        | transcriptional repressor RbsR                  |
| i02_4273       | c4682          | yieO        | putative transport protein YieO                 |
| i02_4274       | c4683          | yieP        | putative transcriptional regulator YieP         |
| i02_4276       | c4685          | yifA        | transcriptional regulator HdfR                  |
| i02_4277       | c4686          | yifE        | hypothetical protein                            |
| i02_4279       | c4687          | yifB        | hypothetical protein                            |
| i02_4279       | c4688          | /           | hypothetical protein                            |
| i02_4280       | c4689          | /           | hypothetical protein                            |
|                | c5500          | ilvL        | ilvG operon leader peptide                      |
| i02_4281       | c4690          | ilvG        | acetolactate synthase 2 catalytic subunit       |
| i02_4282       | c4691          | ilvM        | acetolactate synthase 2 regulatory subunit      |
| i02_4283       | c4692          | ilvE        | branched-chain amino acid aminotransferase      |
| i02_4284       | c4693          | ilvD        | dihydroxy-acid dehydratase                      |
| i02_4285       | c4694          | ilvA        | threonine dehydratase                           |
| i02_4286       | c4695          | ilvY        | DNA-binding transcriptional regulator IlvY      |
| i02_4287       | c4696          | ilvC        | ketol-acid reductoisomerase                     |
| i02_4288       | c4697          | ppiC        | peptidyl-prolyl cis-trans isomerase C           |
| i02_4289       | c4698          | rep         | ATP-dependent DNA helicase Rep                  |
| i02_4290       | c4699          | gppA        | guanosine pentaphosphate phosphohydrolase       |
| i02_4291       |                | /           | hypothetical protein                            |
| i02_4292       | c4700          | rhIB        | ATP-dependent RNA helicase RhIB                 |
| i02_4293       | c4701          | trxA        | thioredoxin                                     |
| i02_4294       |                | /           | hypothetical protein                            |
|                | c5501          | rhoL        | putative rho operon leader peptide              |
| i02_4295       | c4702          | rho         | transcription termination factor Rho            |
| i02_4296       | c4703          | /           | hypothetical protein                            |
| i02_4297       | c4704          | rfe         | undecaprenyl-phosphate                          |
| i02_4298       | c4705          | wzzE        | lipopolysaccharide biosynthesis protein WzzE    |
| i02_4299       | c4706          | wecB        | UDP-N-acetylglucosamine 2-epimerase             |
| i02_4300       | c4707          | wecC        | UDP-N-acetyl-D-mannosamine dehydrogenase        |
| i02_4301       | c4708          | rffG        | dTDP-glucose 4,6-dehydratase                    |
| i02_4302       | c4709          | rffH        | glucose-1-phosphate thymidyltransferase         |
| i02_4303       | c4710          | wecD        | TDP-fucosamine acetyltransferase                |
| i02_4304       | c4711          | wecE        | TDP-4-oxo-6-deoxy-D-glucose transaminase        |
| i02_4306       | c4713          | wzxE        | WzxE protein                                    |
| i02_4305       | c4712          | /           | hypothetical protein                            |
| i02_4307       | c4714          | /           | 4-alpha-L-fucosyltransferase                    |

| <b>Clone D</b> | <b>CFT 073</b> | <b>Gene</b> | <b>Product</b>                                            |
|----------------|----------------|-------------|-----------------------------------------------------------|
| i02_4308       | c4715          | wecF        | putative common antigen polymerase                        |
| i02_4309       | c4716          | wecG        | putative UDP-N-acetyl-D-mannosaminuronic acid transferase |
| i02_4310       | c4717          | yifK        | putative transport protein YifK                           |
| i02_4311       | c4718          | aslB        | putative arylsulfatase regulatory protein                 |
| i02_4313       | c4720          | /           | hypothetical protein                                      |
| i02_4312       | c4719          | aslA        | arylsulfatase                                             |
| i02_4314       | c4721          | hemY        | putative protoheme IX biogenesis protein                  |
| i02_4315       | c4722          | hemX        | putative uroporphyrinogen III                             |
| i02_4316       | c4723          | hemD        | uroporphyrinogen-III synthase                             |
| i02_4317       | c4724          | hemC        | porphobilinogen deaminase                                 |
| i02_4318       | c4725          | cyaA        | adenylate cyclase                                         |
| i02_4319       | c4726          | cyaY        | frataxin-like protein                                     |
| i02_4320       | c4727          | /           | hypothetical protein                                      |
| i02_4321       | c4728          | /           | hypothetical protein                                      |
| i02_4322       | c4729          | /           | hypothetical protein                                      |
| i02_4323       | c4730          | dapF        | diaminopimelate epimerase                                 |
| i02_4324       | c4731          | yigA        | hypothetical protein                                      |
| i02_4325       | c4732          | xerC        | site-specific tyrosine recombinase XerC                   |
| i02_4326       | c4733          | yigB        | flavin mononucleotide phosphatase                         |
| i02_4327       | c4734          | uvrD        | DNA-dependent helicase II                                 |
| i02_4328       | c4735          | /           | hypothetical protein                                      |
| i02_4329       | c4736          | /           | hypothetical protein                                      |
| i02_4330       |                | /           | hypothetical protein                                      |
| i02_4331       | c4737          | corA        | magnesium/nickel/cobalt transporter CorA                  |
| i02_4332       | c4738          | /           | hypothetical protein                                      |
| i02_4333       | c4739          | /           | hypothetical protein                                      |
| i02_4334       | c4740          | rarD        | protein rarD                                              |
| i02_4335       | c4741          | yigI        | hypothetical protein                                      |
| i02_4336       | c4742          | pldA        | phospholipase A                                           |
| i02_4337       | c4743          | /           | hypothetical protein                                      |
| i02_4338       | c4744          | recQ        | ATP-dependent DNA helicase RecQ                           |
| i02_4339       | c4745          | /           | threonine efflux system                                   |
| i02_4340       | c4746          | rhtB        | homoserine/homoserine lactone efflux protein              |
| i02_4341       | c4747          | pldB        | lysophospholipase L2                                      |
| i02_4342       | c4748          | /           | putative sugar phosphatase                                |
| i02_4343       | c4749          | yigM        | membrane protein yigM                                     |
| i02_4344       | c4750          | metR        | transcriptional activator protein metR                    |
| i02_4346       | c4751          | metE        | cobalamin-independent homocysteine transmethylase         |
| i02_4345       |                | /           | hypothetical protein                                      |
| i02_4347       | c4752          | /           | hypothetical protein                                      |
| i02_4348       | c4753          | /           | hypothetical protein                                      |
| i02_4349       | c4754          | /           | hypothetical protein                                      |
| i02_4350       | c4755          | /           | hypothetical protein                                      |
| i02_4351       | c4756          | /           | hypothetical protein                                      |
| i02_4352       | c4757          | /           | hypothetical protein                                      |
| i02_4353       | c4758          | /           | PTS system, glucose-specific IIBC component               |
| i02_4354       | c4759          | /           | transketolase                                             |
| i02_4355       | c4760          | /           | hypothetical protein                                      |
| i02_4356       | c4761          | /           | hypothetical protein                                      |
| i02_4357       | c4762          | /           | putative permease                                         |

| <b>Clone D</b> | <b>CFT 073</b> | <b>Gene</b> | <b>Product</b>                                          |
|----------------|----------------|-------------|---------------------------------------------------------|
| i02_4358       | c4763          | /           | hypothetical protein                                    |
| i02_4359       | c4764          | /           | carbamate kinase                                        |
|                | c4766          | /           | hypothetical protein                                    |
| i02_4360       | c4765          | /           | hypothetical protein                                    |
| i02_4361       | c4767          | /           | hypothetical protein                                    |
| i02_4362       | c4768          | /           | hypothetical protein                                    |
| i02_4363       | c4769          | /           | hypothetical protein                                    |
| i02_4365       |                | /           | hypothetical protein                                    |
| i02_4364       | c4770          | /           | hypothetical protein                                    |
| i02_4366       | c4771          | /           | putative carboxymethylenebutenolidase                   |
| i02_4367       | c4773          | udp         | uridine phosphorylase                                   |
|                | c4772          | /           | hypothetical protein                                    |
| i02_4368       | c4774          | /           | hypothetical protein                                    |
| i02_4369       | c4775          | /           | hypothetical protein                                    |
| i02_4370       | c4776          | /           | hypothetical protein                                    |
| i02_4372       |                | /           | putative aldolase                                       |
| i02_4371       | c4777          | /           | 2-dehydro-3-deoxy-6-phosphogalactonate aldolase         |
| i02_4373       | c4778          | /           | hypothetical protein                                    |
| i02_4374       | c4779          | /           | putative transcriptional regulator                      |
|                | c4780          | /           | hypothetical protein                                    |
| i02_4375       | c4781          | yigN        | DNA recombination protein RmuC                          |
| i02_4376       | c4782          | ubiE        | ubiquinone/menaquinone biosynthesis protein             |
| i02_4377       | c4783          | yigP        | hypothetical protein                                    |
| i02_4378       | c4784          | ubiB        | putative ubiquinone biosynthesis protein UbiB           |
| i02_4379       | c4785          | tatA        | twin arginine translocase protein A                     |
| i02_4380       | c4786          | /           | sec-independent translocase                             |
| i02_4381       | c4787          | yigU        | twin-arginine protein translocation system              |
| i02_4382       | c4788          | yigW        | DNase TatD                                              |
| i02_4383       | c4789          | rfaH        | transcriptional activator RfaH                          |
| i02_4384       | c4790          | yigC        | 3-octaprenyl-4-hydroxybenzoate decarboxylase            |
| i02_4385       | c4791          | fre         | FMN reductase                                           |
| i02_4386       | c4792          | fadA        | 3-ketoacyl-CoA thiolase                                 |
| i02_4387       | c4793          | fadB        | multifunctional fatty acid oxidation complex            |
| i02_4388       | c4794          | pepQ        | proline dipeptidase                                     |
| i02_4389       | c4795          | yigZ        | hypothetical protein                                    |
| i02_4390       | c4796          | trkH        | potassium transporter                                   |
| i02_4391       | c4797          | hemG        | protoporphyrinogen oxidase                              |
| i02_4393       | c4800          | mobB        | molybdopterin-guanine dinucleotide biosynthesis protien |
| i02_4394       | c4801          | mobA        | molybdopterin-guanine dinucleotide biosynthesis protien |
| i02_4395       | c4802          | yihD        | hypothetical protein                                    |
| i02_4396       | c4803          | yihE        | serine/threonine protein kinase                         |
| i02_4397       | c4804          | dsbA        | periplasmic protein disulfide isomerase I               |
| i02_4398       | c4805          | /           | hypothetical protein                                    |
| i02_4399       | c4806          | yihF        | hypothetical protein                                    |
| i02_4400       | c4807          | yihG        | putative acyltransferase                                |
| i02_4401       | c4808          | /           | hypothetical protein                                    |
| i02_4402       |                | xni         | exonuclease IX                                          |
| i02_4403       | c4811          | /           | hypothetical protein                                    |
| i02_4404       | c4812          | engB        | ribosome biogenesis GTP-binding protein YsxC            |



| <b>Clone D</b> | <b>CFT 073</b> | <b>Gene</b> | <b>Product</b>                               |
|----------------|----------------|-------------|----------------------------------------------|
| i02_4405       | c4813          | /           | hypothetical protein                         |
| i02_4407       | c4815          | yihI        | hypothetical protein                         |
| i02_4406       | c4814          | /           | hypothetical protein                         |
| i02_4409       | c4816          | hemN        | coproporphyrinogen III oxidase               |
| i02_4408       |                | /           | predicted protein                            |
| i02_4410       | c4817          | glnG        | nitrogen regulation protein NR(I)            |
| i02_4411       | c4818          | glnL        | nitrogen regulation protein NR(II)           |
| i02_4412       | c4819          | glnA        | glutamine synthetase                         |
| i02_4413       | c4820          | yihK        | GTP-binding protein                          |
| i02_4414       | c4821          | yihL        | putative transcriptional regulator YihL      |
| i02_4415       | c4822          | yihM        | hypothetical protein                         |
| i02_4416       | c4823          | yihN        | hypothetical protein                         |
| i02_4417       | c4824          | yihW        | putative transcriptional regulator YihW      |
| i02_4419       | c4826          | yihU        | oxidoreductase yihU                          |
| i02_4418       | c4825          | yihV        | putative sugar kinase yihV                   |
| i02_4421       | c4827          | yihT        | hypothetical protein                         |
| i02_4422       | c4828          | /           | putative dehydrogenase                       |
| i02_4423       | c4829          | /           | hypothetical protein                         |
| i02_4424       | c4830          | /           | shikimate transporter                        |
| i02_4425       | c4831          | /           | hypothetical protein                         |
| i02_4426       | c4832          | yihX        | phosphatase                                  |
| i02_4427       | c4833          | rbn         | ribonuclease BN                              |
| i02_4428       | c4834          | yihZ        | D-tyrosyl-tRNA(Tyr) deacylase                |
| i02_4429       | c4835          | yiiD        | hypothetical protein                         |
| i02_4430       | c4836          | /           | putative lipase                              |
| i02_4431       |                | /           | putative lipase                              |
| i02_4432       | c4837          | /           | hypothetical protein                         |
| i02_4433       | c4838          | /           | hypothetical protein                         |
| i02_4434       | c4839          | /           | hypothetical protein                         |
| i02_4435       | c4840          | yiiE        | hypothetical protein                         |
| i02_4436       | c4841          | fdhE        | formate dehydrogenase accessory protein FdhE |
| i02_4437       | c4842          | fdoI        | formate dehydrogenase-O subunit gamma        |
| i02_4438       | c4843          | fdoH        | formate dehydrogenase-O beta subunit         |
| i02_4439       | c5624          | fdoG        | formate dehydrogenase-O, major subunit       |
| i02_4440       | c4846          | /           | hypothetical protein                         |
| i02_4441       | c4847          | fdhD        | formate dehydrogenase accessory protein      |
| i02_4442       | c4848          | /           | hypothetical protein                         |
| i02_4443       | c4849          | /           | putative glycoporin                          |
| i02_4444       | c4850          | yiiL        | hypothetical protein                         |
| i02_4445       | c4851          | rhaD        | rhamnulose-1-phosphate aldolase              |
| i02_4446       | c4852          | rhaA        | L-rhamnose isomerase                         |
| i02_4447       | c4853          | rhaB        | rhamnulokinase                               |
| i02_4448       | c4854          | /           | hypothetical protein                         |
| i02_4449       | c4855          | rhaS        | transcriptional activator RhaS               |
| i02_4450       | c4856          | rhaR        | transcriptional activator RhaR               |
| i02_4452       | c4858          | /           | hypothetical protein                         |
| i02_4451       | c4857          | rhaT        | rhamnose-proton symporter                    |
| i02_4453       | c4859          | sodA        | superoxide dismutase                         |
| i02_4454       | c4860          | /           | hypothetical protein                         |
| i02_4455       | c4861          | kdgT        | 2-keto-3-deoxygluconate permease             |
| i02_4456       | c4862          | yiiM        | hypothetical protein                         |
| i02_4457       | c4863          | cpxA        | two-component sensor protein                 |

| <b>Clone D</b> | <b>CFT 073</b> | <b>Gene</b> | <b>Product</b>                                  |
|----------------|----------------|-------------|-------------------------------------------------|
| i02_4458       | c4864          | cpxR        | DNA-binding transcriptional regulator CpxR      |
| i02_4459       | c4865          | cpxP        | periplasmic repressor CpxP                      |
| i02_4460       | c4866          | fieF        | ferrous iron efflux protein F                   |
| i02_4461       | c4867          | pfkA        | 6-phosphofructokinase                           |
|                | c4868          | /           | hypothetical protein                            |
| i02_4462       | c4869          | sbp         | sulfate transporter subunit                     |
| i02_4463       | c4870          | cdh         | CDP-diacylglycerol pyrophosphatase              |
| i02_4464       | c4871          | tpiA        | triosephosphate isomerase                       |
| i02_4465       | c4872          | yiiQ        | hypothetical protein                            |
| i02_4466       | c4873          | yiiR        | hypothetical protein                            |
| i02_4467       | c4874          | yiiS        | hypothetical protein                            |
| i02_4468       | c4875          | yiiT        | universal stress protein UspD                   |
| i02_4469       | c4876          | fpr         | ferredoxin-NADP reductase                       |
| i02_4470       | c4877          | glpX        | fructose 1,6-bisphosphatase II                  |
| i02_4471       | c4878          | glpK        | glycerol kinase                                 |
| i02_4472       | c4879          | glpF        | glycerol uptake facilitator protein             |
| i02_4473       | c4880          | yiiU        | hypothetical protein                            |
|                | c4882          | /           | hypothetical protein                            |
| i02_4474       | c4881          | menG        | ribonuclease activity regulator protein RraA    |
| i02_4475       | c4883          | menA        | 1,4-dihydroxy-2-naphthoate                      |
| i02_4476       | c4884          | hslU        | ATP-dependent protease ATP-binding subunit HslU |
| i02_4477       | c4885          | hslV        | ATP-dependent protease peptidase subunit        |
| i02_4478       | c4886          | ftsN        | essential cell division protein FtsN            |
| i02_4479       | c4887          | cytR        | DNA-binding transcriptional regulator CytR      |
| i02_4480       | c4888          | priA        | primosome assembly protein PriA                 |
| i02_4481       | c4889          | /           | hypothetical protein                            |
| i02_4482       | c4890          | yiiX        | putative peptidoglycan peptidase                |
| i02_4483       | c4891          | metJ        | transcriptional repressor protein MetJ          |
| i02_4484       | c4892          | metB        | cystathionine gamma-synthase                    |
| i02_4485       | c4893          | metL        | bifunctional aspartate kinase II/homoserine     |
| i02_4486       | c4894          | /           | nucleoside-specific channel-forming protein tsx |
| i02_4487       | c4895          | /           | hypothetical protein                            |
| i02_4488       | c4896          | /           | hypothetical protein                            |
| i02_4489       | c4897          | /           | hypothetical protein                            |
| i02_4490       | c4898          | /           | hypothetical protein                            |
| i02_4491       | c4899          | metF        | 5,10-methylenetetrahydrofolate reductase        |
| i02_4492       | c4900          | katG        | peroxidase/catalase HPI                         |
| i02_4493       | c4901          | yijE        | putative transport protein YijE                 |
| i02_4494       | c4902          | yijF        | hypothetical protein                            |
| i02_4495       | c4903          | /           | hypothetical protein                            |
| i02_4496       | c4904          | gldA        | glycerol dehydrogenase                          |
| i02_4497       | c4905          | talC        | fructose-6-phosphate aldolase                   |
| i02_4498       | c4906          | ptsA        | phosphoenolpyruvate-protein phosphotransferase  |
| i02_4499       | c4907          | frwC        | putative fructose-like permease EIIC subunit 2  |
| i02_4500       | c4908          | frwB        | putative fructose-like phosphotransferase EIIB  |
|                | c4909          | /           | hypothetical protein                            |
| i02_4501       | c4910          | pfID        | putative formate acetyltransferase 2            |
| i02_4502       | c4911          | pfIC        | pyruvate formate lyase II activase              |
| i02_4503       | c4912          | frwD        | putative fructose-like phosphotransferase EIIB  |
| i02_4504       | c4913          | yijO        | putative transcriptional regulator YijO         |
| i02_4505       | c4914          | yijP        | hypothetical protein                            |

| <b>Clone D</b> | <b>CFT 073</b> | <b>Gene</b> | <b>Product</b>                                |
|----------------|----------------|-------------|-----------------------------------------------|
| i02_4506       | c4915          | ppc         | phosphoenolpyruvate carboxylase               |
| i02_4507       | c4916          | argE        | acetylornithine deacetylase                   |
| i02_4508       | c4917          | argC        | N-acetyl-gamma-glutamyl-phosphate reductase   |
| i02_4509       | c4918          | argB        | acetylglutamate kinase                        |
| i02_4510       | c4919          | argH        | argininosuccinate lyase                       |
| i02_4511       | c4920          | /           | starvation sensing protein rspA               |
| i02_4512       | c4921          | yjiZ        | putative transport protein YjjL               |
| i02_4513       | c4922          | oxyR        | DNA-binding transcriptional regulator OxyR    |
| i02_4514       | c4923          | udhA        | soluble pyridine nucleotide transhydrogenase  |
| i02_4515       | c4924          | /           | putative hippuricase                          |
| i02_4516       | c4925          | /           | putative citrate permease                     |
| i02_4517       | c4926          | yijC        | DNA-binding transcriptional repressor FabR    |
| i02_4518       | c4927          | yijD        | hypothetical protein                          |
| i02_4519       | c4928          | trmA        | tRNA (uracil-5-)-methyltransferase            |
| i02_4520       | c4929          | btuB        | vitamin B12/cobalamin outer membrane          |
| i02_4521       | c4930          | murl        | glutamate racemase                            |
| i02_4523       | c4931          | murB        | UDP-N-acetylenolpyruvoylglucosamine reductase |
| i02_4524       | c4932          | birA        | biotin--protein ligase                        |
| i02_4525       | c4933          | coaA        | pantothenate kinase                           |
| i02_4526       | c4934          | /           | hypothetical protein                          |
| i02_4527       | c4935          | tuf         | elongation factor Tu                          |
| i02_4528       | c4936          | secE        | preprotein translocase subunit SecE           |
| i02_4529       | c4937          | nusG        | transcription antitermination protein NusG    |
|                | c4938          | /           | hypothetical protein                          |
| i02_4530       | c4939          | rplK        | 50S ribosomal protein L11                     |
| i02_4531       | c4940          | rplA        | 50S ribosomal protein L1                      |
| i02_4532       | c4941          | rplJ        | 50S ribosomal protein L10                     |
|                | c4942          | /           | hypothetical protein                          |
| i02_4533       | c4943          | rplL        | 50S ribosomal protein L7/L12                  |
| i02_4534       | c4944          | rpoB        | DNA-directed RNA polymerase subunit beta      |
| i02_4535       | c4945          | rpoC        | DNA-directed RNA polymerase subunit beta'     |
| i02_4536       | c4946          | thiH        | thiamine biosynthesis protein ThiH            |
| i02_4537       | c4947          | thiG        | thiazole synthase                             |
| i02_4538       | c4948          | thiS        | sulfur carrier protein ThiS                   |
| i02_4539       | c4949          | thiF        | thiamine biosynthesis protein ThiF            |
| i02_4540       | c4950          | thiE        | thiamine-phosphate pyrophosphorylase          |
| i02_4541       | c4951          | thiC        | thiamine biosynthesis protein ThiC            |
| i02_4542       | c4952          | yjaE        | anti-RNA polymerase sigma 70 factor           |
| i02_4543       | c4953          | nudC        | NADH pyrophosphatase                          |
| i02_4544       | c4954          | hemE        | uroporphyrinogen decarboxylase                |
| i02_4545       | c4955          | nfi         | endonuclease V                                |
| i02_4546       | c4956          | yjaG        | hypothetical protein                          |
| i02_4547       | c4957          | hupA        | transcriptional regulator HU subunit alpha    |
| i02_4548       | c4958          | yjaH        | hypothetical protein                          |
| i02_4549       | c4959          | zraP        | zinc resistance protein                       |
| i02_4551       | c4961          | hydH        | sensor protein ZraS                           |
| i02_4552       | c4962          | hydG        | transcriptional regulatory protein ZraR       |
| i02_4553       | c4963          | purD        | phosphoribosylamine--glycine ligase           |
| i02_4554       | c4964          | purH        | bifunctional                                  |
| i02_4555       | c4965          | /           | hypothetical protein                          |
| i02_4556       |                | /           | hypothetical protein                          |
| i02_4558       | c4968          | yjaA        | hypothetical protein                          |

| <b>Clone D</b> | <b>CFT 073</b> | <b>Gene</b> | <b>Product</b>                                |
|----------------|----------------|-------------|-----------------------------------------------|
| i02_4559       | c4969          | yjaB        | hypothetical protein                          |
| i02_4560       | c4970          | metA        | homoserine O-succinyltransferase              |
| i02_4561       | c4971          | aceB        | malate synthase                               |
| i02_4562       | c4972          | aceA        | isocitrate lyase                              |
|                | c4973          | /           | hypothetical protein                          |
| i02_4563       | c4974          | aceK        | bifunctional isocitrate dehydrogenase         |
| i02_4564       | c4975          | iclR        | transcriptional repressor IclR                |
| i02_4565       | c4976          | metH        | B12-dependent methionine synthase             |
| i02_4566       | c4977          | /           | hypothetical protein                          |
| i02_4567       | c4978          | /           | hypothetical protein                          |
| i02_4568       | c4979          | yjbB        | hypothetical protein                          |
| i02_4569       | c4980          | pepE        | peptidase E                                   |
| i02_4570       | c4981          | /           | putative oxidoreductase                       |
| i02_4571       | c4982          | /           | PTS system, mannose-specific IID component    |
| i02_4572       | c4983          | /           | PTS system, mannose-specific IIC component    |
| i02_4573       | c4984          | /           | putative sorbose PTS component                |
| i02_4574       | c4985          | /           | putative sorbose PTS component                |
| i02_4575       | c4986          | /           | sorbitol-6-phosphate 2-dehydrogenase          |
| i02_4576       | c4987          | /           | putative transcriptional regulator of sorbose |
| i02_4577       | c4988          | yjbC        | 23S rRNA pseudouridine synthase F             |
| i02_4578       | c4989          | yjbD        | hypothetical protein                          |
| i02_4579       | c4990          | lysC        | aspartate kinase III                          |
| i02_4580       | c4991          | pgi         | glucose-6-phosphate isomerase                 |
|                | c4994          | yjbE        | hypothetical protein                          |
| i02_4581       | c4995          | yjbF        | lipoprotein yjbF precursor                    |
| i02_4582       | c4996          | yjbG        | hypothetical protein                          |
| i02_4583       | c4997          | yjbH        | lipoprotein yjbH precursor                    |
| i02_4584       | c4998          | /           | hypothetical protein                          |
|                | c4999          | /           | hypothetical protein                          |
| i02_4585       | c5000          | /           | hypothetical protein                          |
| i02_4586       | c5001          | yjbA        | phosphate-starvation-inducible protein PsiE   |
| i02_4587       | c5002          | malG        | maltose transporter permease                  |
| i02_4588       | c5003          | malF        | maltose transporter membrane protein          |
| i02_4589       | c5004          | malE        | maltose ABC transporter periplasmic protein   |
| i02_4590       | c5005          | malK        | maltose/maltodextrin transporter              |
| i02_4591       | c5006          | lamB        | maltoporin                                    |
| i02_4592       | c5007          | malM        | maltose regulon periplasmic protein           |
| i02_4593       | c5008          | /           | hypothetical protein                          |
| i02_4594       | c5009          | ubiC        | chorismate pyruvate lyase                     |
| i02_4595       | c5010          | ubiA        | 4-hydroxybenzoate octaprenyltransferase       |
| i02_4596       | c5011          | plsB        | glycerol-3-phosphate acyltransferase          |
| i02_4598       | c5013          | dgkA        | diacylglycerol kinase                         |
| i02_4597       | c5012          | /           | hypothetical protein                          |
| i02_4599       | c5014          | lexA        | LexA repressor                                |
| i02_4600       | c5015          | dinF        | DNA-damage-inducible SOS response protein     |
| i02_4601       | c5016          | yjbJ        | putative stress-response protein              |
| i02_4603       | c5018          | yjbN        | tRNA-dihydrouridine synthase A                |
| i02_4602       | c5017          | yjbK        | zinc uptake transcriptional repressor         |
| i02_4604       | c5019          | pspG        | phage shock protein G                         |
| i02_4605       | c5020          | qor         | quinone oxidoreductase, NADPH-dependent       |
| i02_4606       | c5021          | /           | putative oxidoreductase                       |
| i02_4607       | c5022          | /           | putative transmembrane transport protein      |

| <b>Clone D</b> | <b>CFT 073</b> | <b>Gene</b> | <b>Product</b>                                 |
|----------------|----------------|-------------|------------------------------------------------|
| i02_4608       | c5023          | /           | putative crotonase                             |
| i02_4609       | c5024          | /           | putative propionate CoA-transferase            |
| i02_4610       | c5025          | /           | putative regulator                             |
| i02_4611       | c5026          | dnaB        | replicative DNA helicase                       |
| i02_4613       | c5028          | alr         | alanine racemase                               |
| i02_4612       | c5027          | /           | hypothetical protein                           |
| i02_4614       | c5029          | /           | putative transporter                           |
| i02_4615       | c5030          | /           | NadR-like protein                              |
| i02_4616       | c5031          | tyrB        | aromatic amino acid aminotransferase           |
| i02_4617       | c5032          | sucA        | 2-oxoglutarate dehydrogenase E1 component      |
| i02_4619       | c5034          | /           | dihydrolipoamide succinyltransferase component |
| i02_4618       | c5033          | /           | hypothetical protein                           |
| i02_4620       | c5035          | /           | putative 2-oxoglutarate dehydrogenase          |
| i02_4621       | c5036          | /           | succinyl-CoA synthetase beta chain             |
| i02_4622       | c5037          | /           | succinyl-CoA synthetase alpha chain            |
| i02_4623       | c5038          | /           | putative membrane-bound protein                |
| i02_4624       | c5039          | /           | putative lactate dehydrogenase                 |
| i02_4625       | c5040          | /           | putative c4-dicarboxylate transport            |
|                | c5042          | /           | hypothetical protein                           |
| i02_4626       | c5041          | /           | putative transport sensor protein              |
| i02_4628       | c5043          | /           | hypothetical protein                           |
|                | c5044          | /           | hypothetical protein                           |
| i02_4629       | c5045          | aphA        | acid phosphatase/phosphotransferase            |
| i02_4630       | c5046          | yjbQ        | hypothetical protein                           |
| i02_4631       | c5047          | yjbR        | hypothetical protein                           |
| i02_4632       | c5048          | uvrA        | excinuclease ABC subunit A                     |
| i02_4633       | c5049          | ssb         | single-stranded DNA-binding protein            |
| i02_4635       | c5051          | /           | hypothetical protein                           |
| i02_4634       | c5050          | yjcB        | hypothetical protein                           |
| i02_4636       | c5052          | yjcC        | hypothetical protein                           |
| i02_4637       | c5053          | soxS        | DNA-binding transcriptional regulator SoxS     |
| i02_4638       | c5054          | soxR        | redox-sensitive transcriptional activator SoxR |
| i02_4639       | c5055          | /           | hypothetical protein                           |
| i02_4640       | c5056          | /           | hypothetical protein                           |
| i02_4641       | c5057          | /           | putative Na(+)/H(+) exchanger yjcE             |
| i02_4642       | c5058          | /           | putative transcriptional regulator             |
|                | c5059          | /           | hypothetical protein                           |
| i02_4643       | c5060          | /           | hypothetical protein                           |
| i02_4644       | c5061          | /           | hypothetical protein                           |
| i02_4645       | c5062          | actP        | acetate permease                               |
| i02_4646       | c5063          | yjcH        | hypothetical protein                           |
| i02_4647       |                | /           | hypothetical protein                           |
| i02_4648       | c5064          | acs         | acetyl-CoA synthetase                          |
| i02_4649       | c5065          | /           | hypothetical protein                           |
| i02_4650       | c5066          | nrfA        | cytochrome c552                                |
| i02_4651       | c5067          | nrfB        | cytochrome c nitrite reductase pentaheme       |
| i02_4652       | c5068          | nrfC        | NrfC protein                                   |
| i02_4653       | c5069          | nrfD        | NrfD protein                                   |
| i02_4654       | c5070          | nrfE        | heme lyase subunit NrfE                        |
| i02_4655       | c5071          | nrfF        | formate-dependent nitrite reductase complex    |
| i02_4656       | c5072          | nrfG        | formate-dependent nitrite reductase complex    |
| i02_4657       | c5073          | /           | hypothetical protein                           |

| <b>Clone D</b> | <b>CFT 073</b> | <b>Gene</b> | <b>Product</b>                                   |
|----------------|----------------|-------------|--------------------------------------------------|
| i02_4658       | c5074          | gltP        | glutamate/aspartate:proton symporter             |
| i02_4659       | c5075          | /           | hypothetical protein                             |
| i02_4660       | c5076          | yjcO        | hypothetical protein                             |
| i02_4661       | c5077          | yddO        | ABC transporter ATP-binding protein              |
| i02_4662       | c5078          | /           | putative oligopeptide ABC transporter            |
| i02_4663       | c5079          | yddQ        | ABC transporter permease                         |
| i02_4664       | c5080          | yddR        | ABC transporter permease                         |
| i02_4665       | c5081          | /           | hypothetical protein                             |
| i02_4667       | c5083          | /           | hypothetical protein                             |
| i02_4666       | c5625          | fdhF        | formate dehydrogenase H                          |
| i02_4668       | c5085          | yjcP        | putative outer membrane efflux protein MdtP      |
| i02_4669       | c5086          | yjcQ        | multidrug efflux system protein MdtO             |
| i02_4670       | c5087          | yjcR        | multidrug resistance protein MdtN                |
| i02_4671       | c5088          | /           | hypothetical protein                             |
| i02_4672       | c5089          | yjcS        | hypothetical protein                             |
| i02_4673       | c5090          | yjcT        | D-allose kinase                                  |
| i02_4674       | c5091          | yjcU        | allulose-6-phosphate 3-epimerase                 |
| i02_4675       | c5092          | yjcV        | D-allose transporter subunit                     |
| i02_4676       | c5093          | yjcW        | D-allose transporter ATP-binding protein         |
| i02_4677       | c5094          | yjcX        | D-allose transporter subunit                     |
| i02_4678       | c5095          | rpiR        | DNA-binding transcriptional repressor RpiR       |
| i02_4679       | c5096          | rpiB        | ribose-5-phosphate isomerase B                   |
| i02_4680       | c5097          | /           | hypothetical protein                             |
| i02_4681       | c5098          | phnP        | carbon-phosphorus lyase complex accessory        |
| i02_4682       | c5099          | phnO        | aminoalkylphosphonic acid N-acetyltransferase    |
| i02_4683       |                | phnN        | ribose 1,5-bisphosphokinase                      |
| i02_4684       | c5101          | phnM        | PhnM protein                                     |
| i02_4685       | c5102          | phnL        | phosphonate ABC transporter ATP-binding protein  |
| i02_4686       | c5103          | phnK        | phosphonate C-P lyase system protein PhnK        |
| i02_4687       | c5104          | phnJ        | PhnJ protein                                     |
| i02_4689       | c5105          | phnI        | PhnI protein                                     |
| i02_4690       | c5106          | phnH        | carbon-phosphorus lyase complex subunit          |
| i02_4691       | c5107          | phnG        | PhnG protein                                     |
| i02_4692       | c5108          | phnF        | phosphonate metabolism transcriptional regulator |
| i02_4693       | c5109          | phnE        | membrane channel protein component of Pn         |
| i02_4694       | c5110          | phnD        | phosphonates-binding periplasmic protein         |
| i02_4695       | c5111          | phnC        | phosphonate/organophosphate ester transporter    |
| i02_4696       | c5112          | phnB        | hypothetical protein                             |
| i02_4698       | c5113          | phnA        | PhnA protein                                     |
| i02_4699       | c5114          | yjdA        | hypothetical protein                             |
| i02_4700       | c5115          | yjcZ        | hypothetical protein                             |
| i02_4701       | c5116          | proP        | proline/glycine betaine transporter              |
| i02_4702       | c5117          | basS        | sensor protein BasS/PmrB                         |
| i02_4703       | c5118          | basR        | DNA-binding transcriptional regulator BasR       |
| i02_4704       | c5119          | yjdB        | putative cell division protein                   |
| i02_4705       | c5120          | yjdE        | arginine:agmatin antiporter                      |
| i02_4706       | c5121          | adiY        | putative regulatory protein adiY                 |
| i02_4707       | c5122          | adiA        | biodegradative arginine decarboxylase            |
| i02_4708       | c5123          | melR        | DNA-binding transcriptional regulator MelR       |
| i02_4709       | c5124          | melA        | alpha-galactosidase                              |
| i02_4710       |                | /           | membrane protein                                 |

| <b>Clone D</b> | <b>CFT 073</b> | <b>Gene</b> | <b>Product</b>                                   |
|----------------|----------------|-------------|--------------------------------------------------|
| i02_4711       |                | yjdF        | hypothetical protein                             |
| i02_4712       | c5127          | fumB        | fumarate hydratase class I, anaerobic            |
| i02_4713       | c5128          | dcuB        | anaerobic C4-dicarboxylate transporter           |
| i02_4714       | c5129          | /           | hypothetical protein                             |
| i02_4715       | c5130          | yjdG        | DNA-binding transcriptional activator DcuR       |
| i02_4717       | c5132          | /           | hypothetical protein                             |
| i02_4716       | c5131          | yjdH        | sensory histidine kinase DcuS                    |
| i02_4718       | c5133          | yjdI        | hypothetical protein                             |
|                | c5134          | yjdJ        | hypothetical protein                             |
| i02_4719       | c5135          | /           | hypothetical protein                             |
| i02_4720       |                | yjdK        | hypothetical protein                             |
| i02_4721       | c5136          | /           | hypothetical protein                             |
| i02_4722       | c5137          | /           | hypothetical protein                             |
| i02_4723       | c5138          | lysS        | lysyl-tRNA synthetase                            |
| i02_4724       | c5139          | yjdL        | putative transporter YjdL                        |
| i02_4725       | c5140          | cadA        | lysine decarboxylase                             |
| i02_4726       | c5141          | cadB        | lysine/cadaverine antiporter                     |
| i02_4727       | c5142          | cadC        | DNA-binding transcriptional activator CadC       |
| -              | c5143          | /           | hypothetical protein                             |
| -              | c5144          | /           | hypothetical protein                             |
| -              | c5145          | /           | hypothetical protein                             |
| -              | c5146          | /           | hypothetical protein                             |
| -              | c5147          | /           | hypothetical protein                             |
| -              | c5148          | /           | hypothetical protein                             |
| -              | c5149          | /           | hypothetical protein                             |
| -              | c5150          | /           | hypothetical protein                             |
| -              | c5151          | /           | hypothetical protein                             |
| -              | c5152          | /           | putative radC-like protein yeeS                  |
| -              | c5153          | /           | hypothetical protein                             |
| -              | c5154          | /           | hypothetical protein                             |
| -              | c5155          | /           | hypothetical protein                             |
| -              | c5156          | /           | hypothetical protein                             |
| -              | c5157          | /           | hypothetical protein                             |
| -              | c5158          | /           | hypothetical protein                             |
| -              | c5159          | /           | hypothetical protein                             |
| -              | c5160          | /           | putative transcriptional regulator YfjR          |
| -              | c5161          | /           | hypothetical protein                             |
| -              | c5162          | /           | hypothetical protein                             |
| -              | c5163          | /           | hypothetical protein                             |
| -              | c5164          | /           | hypothetical protein                             |
| -              | c5165          | /           | hypothetical protein                             |
| -              | c5166          | /           | partial transposase                              |
| -              | c5167          | /           | transposase IS629                                |
| -              | c5168          | /           | hypothetical protein                             |
| -              | c5169          | /           | hypothetical protein                             |
| -              | c5170          | /           | hypothetical protein                             |
| -              | c5171          | /           | hypothetical protein                             |
| -              | c5172          | /           | hypothetical protein                             |
| -              | c5173          | /           | hypothetical protein                             |
| -              | c5174          | ireA        | putative iron-regulated outer membrane virulence |
| -              | c5175          | /           | hypothetical protein                             |
| -              | c5176          | /           | transposase                                      |

| Clone D  | CFT 073 | Gene   | Product                                       |
|----------|---------|--------|-----------------------------------------------|
| -        | c5177   | /      | hypothetical protein                          |
| -        | c5178   | /      | transposase IS629                             |
| -        | c5179   | papG_2 | PapG protein                                  |
| -        | c5180   | papF_2 | PapF protein                                  |
| -        | c5181   | papE_2 | PapE protein                                  |
| -        | c5182   | papK_2 | PapK protein                                  |
| -        | c5183   | /      | hypothetical protein                          |
| -        | c5184   | papJ_2 | PapJ protein                                  |
| -        | c5185   | papD_2 | PapD protein                                  |
| -        | c5186   | papC_2 | PapC protein                                  |
| -        | c5187   | papH_2 | PapH protein                                  |
| -        | c5188   | papA_2 | PapA protein                                  |
| -        | c5189   | papI_2 | PapI protein                                  |
| -        | c5190   | /      | hypothetical protein                          |
| -        | c5191   | /      | hypothetical protein                          |
| -        | c5192   | /      | hypothetical protein                          |
| -        | c5193   | /      | hypothetical protein                          |
| -        | c5194   | /      | hypothetical protein                          |
| -        | c5195   | /      | hypothetical protein                          |
| -        | c5196   | /      | transposase insC                              |
| -        | c5197   | /      | transposase insD                              |
| -        | c5198   | /      | hypothetical protein                          |
| -        | c5199   | /      | hypothetical protein                          |
| -        | c5200   | /      | hypothetical protein                          |
| -        | c5201   | pgtP   | transporter protein                           |
| -        | c5202   | pgtC   | regulatory protein                            |
| -        | c5203   | pgtB   | regulatory protein                            |
| -        | c5204   | pgtA   | transport activator                           |
| -        | c5205   | /      | hypothetical protein                          |
| -        | c5206   | /      | hypothetical protein                          |
| -        | c5207   | /      | hypothetical protein                          |
| -        | c5208   | /      | hypothetical protein                          |
| -        | c5209   | /      | hypothetical protein                          |
| -        | c5210   | /      | hypothetical protein                          |
| -        | c5211   | /      | hypothetical protein                          |
| -        | c5212   | /      | hypothetical protein                          |
| -        | c5213   | /      | transposase IS629                             |
| -        | c5214   | /      | hypothetical protein                          |
| -        | c5215   | /      | hypothetical protein                          |
| -        | c5216   | /      | prophage P4 integrase                         |
| i02_4728 | c5217   | yjdC   | putative transcriptional regulator            |
| i02_4729 | c5218   | dipZ   | thiol:disulfide interchange protein precursor |
| i02_4730 | c5219   | cutA   | divalent-cation tolerance protein CutA        |
| i02_4731 | c5220   | dcuA   | anaerobic C4-dicarboxylate transporter        |
|          | c5221   | /      | hypothetical protein                          |
| i02_4732 | c5222   | aspA   | aspartate ammonia-lyase                       |
| i02_4733 | c5223   | fxsA   | FxsA                                          |
| i02_4734 | c5224   | yjeH   | inner membrane protein YjeH                   |
|          | c5225   | /      | hypothetical protein                          |
| i02_4736 | c5226   | groES  | co-chaperonin GroES                           |
| i02_4735 |         | /      | hypothetical protein                          |
| i02_4737 | c5227   | groEL  | chaperonin GroEL                              |



| <b>Clone D</b> | <b>CFT 073</b> | <b>Gene</b> | <b>Product</b>                              |
|----------------|----------------|-------------|---------------------------------------------|
| i02_4738       | c5228          | yjeI        | hypothetical protein                        |
|                | c5229          | /           | hypothetical protein                        |
| i02_4739       | c5230          | yjeJ        | hypothetical protein                        |
| i02_4740       | c5231          | yjeK        | hypothetical protein                        |
| i02_4741       | c5232          | efp         | elongation factor P                         |
|                | c5233          | /           | hypothetical protein                        |
| i02_4742       | c5234          | ecnA        | entericidin A                               |
| i02_4743       | c5235          | ecnB        | entericidin B membrane lipoprotein          |
| i02_4744       | c5236          | sugE        | SugE protein                                |
| i02_4745       | c5237          | blc         | outer membrane lipoprotein Blc              |
| i02_4746       | c5238          | ampC        | beta-lactamase                              |
| i02_4747       | c5239          | frdD        | fumarate reductase subunit D                |
| i02_4748       | c5240          | frdC        | fumarate reductase subunit C                |
| i02_4749       | c5241          | frdB        | fumarate reductase iron-sulfur subunit      |
| i02_4750       | c5242          | frdA        | fumarate reductase flavoprotein subunit     |
| i02_4751       | c5243          | yjeA        | lysyl-tRNA synthetase                       |
| i02_4752       | c5244          | yjeM        | putative transporter YjeM                   |
| i02_4754       | c5246          | /           | hypothetical protein                        |
| i02_4753       | c5245          | yjeP        | hypothetical protein                        |
| i02_4755       | c5247          | psd         | phosphatidylserine decarboxylase            |
| i02_4756       | c5248          | yjeQ        | ribosome-associated GTPase                  |
| i02_4757       | c5249          | yjeR        | oligoribonuclease                           |
| i02_4759       | c5251          | yjeF        | hypothetical protein                        |
| i02_4758       | c5250          | yjeS        | putative electron transport protein yjeS    |
| i02_4760       | c5252          | yjeE        | putative ATPase                             |
| i02_4761       | c5253          | amiB        | N-acetylmuramoyl-L-alanine amidase II       |
| i02_4762       | c5254          | mutL        | DNA mismatch repair protein                 |
| i02_4763       | c5255          | miaA        | tRNA dimethylallyltransferase               |
| i02_4764       | c5256          | hfq         | RNA-binding protein Hfq                     |
| i02_4765       | c5257          | hflX        | putative GTPase HflX                        |
| i02_4766       | c5258          | hflK        | FtsH protease regulator HflK                |
| i02_4767       | c5259          | hflC        | FtsH protease regulator HflC                |
| i02_4768       | c5260          | yjeT        | hypothetical protein                        |
| i02_4769       | c5261          | purA        | adenylosuccinate synthetase                 |
| i02_4770       | c5262          | yjeB        | transcriptional repressor NsrR              |
| i02_4771       | c5263          | vacB        | exoribonuclease R                           |
| i02_4772       | c5264          | yjfH        | 23S rRNA (guanosine-2'-O)-methyltransferase |
| i02_4773       | c5265          | yjfI        | hypothetical protein                        |
| i02_4774       | c5266          | yjfJ        | hypothetical protein                        |
| i02_4775       | c5267          | yjfK        | hypothetical protein                        |
| i02_4776       | c5268          | yjfL        | hypothetical protein                        |
| i02_4776       | c5269          | /           | hypothetical protein                        |
|                | c5270          | /           | hypothetical protein                        |
|                | c5271          | /           | hypothetical protein                        |
| i02_4777       | c5272          | yjfM        | hypothetical protein                        |
| i02_4778       | c5274          | yjfC        | hypothetical protein                        |
| i02_4779       | c5275          | aidB        | isovaleryl CoA dehydrogenase                |
| i02_4780       | c5276          | yjfN        | hypothetical protein                        |
| i02_4781       | c5277          | yjfO        | hypothetical protein                        |
| i02_4782       | c5278          | yjfP        | esterase                                    |
| i02_4783       | c5279          | yjfQ        | transcriptional repressor UlaR              |
| i02_4784       | c5280          | yjfR        | putative L-ascorbate 6-phosphate lactonase  |

| <b>Clone D</b> | <b>CFT 073</b> | <b>Gene</b> | <b>Product</b>                                  |
|----------------|----------------|-------------|-------------------------------------------------|
| i02_4785       | c5281          | ulaA        | ascorbate-specific PTS system enzyme IIC        |
|                | c5282          | /           | hypothetical protein                            |
| i02_4786       | c5283          | sgaB        | L-ascorbate-specific enzyme IIB component       |
| i02_4787       | c5284          | ptxA        | L-ascorbate-specific enzyme IIA component       |
| i02_4788       | c5285          | ulaD        | 3-keto-L-gulonate-6-phosphate decarboxylase     |
|                | c5286          | /           | hypothetical protein                            |
| i02_4789       | c5287          | sgaU        | L-xylulose 5-phosphate 3-epimerase              |
| i02_4790       | c5288          | sgaE        | L-ribulose-5-phosphate 4-epimerase              |
| i02_4791       | c5289          | yjfY        | hypothetical protein                            |
|                | c5290          | /           | hypothetical protein                            |
| i02_4792       | c5291          | rpsF        | 30S ribosomal protein S6                        |
| i02_4793       |                | priB        | primosomal replication protein N                |
| i02_4794       | c5292          | rpsR        | 30S ribosomal protein S18                       |
|                | c5293          | /           | hypothetical protein                            |
| i02_4795       | c5294          | rplI        | 50S ribosomal protein L9                        |
| i02_4796       | c5295          | /           | hypothetical protein                            |
| i02_4797       | c5296          | /           | hypothetical protein                            |
| i02_4799       | c5297          | /           | hypothetical protein                            |
| i02_4800       | c5298          | /           | hexuronate transporter                          |
| i02_4801       | c5299          | /           | putative oxidoreductase                         |
| i02_4802       | c5300          | /           | putative acetyl-CoA:acetoacetyl-CoA transferase |
| i02_4803       | c5301          | /           | hypothetical protein                            |
| i02_4805       | c5302          | /           | hypothetical protein                            |
| i02_4806       | c5303          | fabG        | 3-ketoacyl-(acyl-carrier-protein) reductase     |
| i02_4807       | c5304          | /           | hypothetical protein                            |
| i02_4808       | c5305          | ytfB        | hypothetical protein                            |
| i02_4809       | c5306          | fkIB        | peptidyl-prolyl cis-trans isomerase             |
| i02_4810       | c5307          | cycA        | D-alanine/D-serine/glycine permease             |
| i02_4811       | c5308          | ytfE        | iron-sulfur cluster repair di-iron protein      |
| i02_4812       | c5309          | ytfF        | hypothetical protein                            |
| i02_4814       | c5311          | ytfH        | hypothetical protein                            |
| i02_4813       | c5310          | ytfG        | hypothetical protein                            |
| i02_4815       | c5312          | /           | hypothetical protein                            |
| i02_4816       | c5313          | cysQ        | adenosine-3'(2'),5'-bisphosphate nucleotidase   |
| i02_4817       | c5314          | /           | hypothetical protein                            |
| i02_4818       | c5315          | ytfK        | hypothetical protein                            |
| i02_4819       | c5316          | ytfL        | hypothetical protein                            |
| i02_4820       | c5317          | msrA        | methionine sulfoxide reductase A                |
| i02_4821       | c5318          | ytfM        | hypothetical protein                            |
| i02_4822       | c5319          | ytfN        | hypothetical protein                            |
| i02_4823       | c5320          | ytfP        | hypothetical protein                            |
| i02_4824       | c5321          | /           | hypothetical protein                            |
| i02_4825       | c5322          | /           | hypothetical protein                            |
| i02_4826       | c5323          | ppa         | inorganic pyrophosphatase                       |
| i02_4827       | c5324          | /           | hypothetical protein                            |
| i02_4828       | c5325          | ytfQ        | ABC transporter periplasmic-binding protein     |
| i02_4829       | c5326          | ytfR        | ABC transporter ATP-binding protein             |
| i02_4830       | c5327          | ytfT        | ABC transporter permease                        |
| i02_4831       | c5328          | yjfF        | inner membrane ABC transporter permease protein |
| i02_4832       | c5329          | fbp         | fructose-1,6-bisphosphatase                     |
| i02_4833       | c5330          | /           | hypothetical protein                            |

| Clone D   | CFT 073 | Gene | Product                                                                    |
|-----------|---------|------|----------------------------------------------------------------------------|
| i02_4834  | c5331   | yjfG | UDP-N-acetylmuramate:L-alanyl-gamma-D-glutamyl-meso-diaminopimelate ligase |
| i02_4835  | c5332   | yjgA | hypothetical protein                                                       |
| i02_4836  | c5333   | pmbA | peptidase PmbA                                                             |
| i02_4838  | c5335   | cybC | soluble cytochrome b562 precursor                                          |
| i02_4837  | c5334   | /    | hypothetical protein                                                       |
| i02_4839  | c5336   | nrdG | anaerobic ribonucleotide reductase-activating                              |
| i02_4840  | c5337   | nrdD | anaerobic ribonucleoside triphosphate reductase                            |
| i02_4841  |         | /    | hypothetical protein                                                       |
| i02_4842  | c5338   | treC | trehalose-6-phosphate hydrolase                                            |
| i02_4843  | c5339   | treB | trehalose(maltose)-specific PTS system                                     |
| i02_4844  | c5340   | treR | trehalose repressor                                                        |
| i02_4845  | c5341   | mgtA | magnesium-transporting ATPase MgtA                                         |
| i02_4846  |         | /    | hypothetical protein                                                       |
|           | c5343   | /    | hypothetical protein                                                       |
| i02_4847  | c5342   | yjgF | hypothetical protein                                                       |
| i02_4848  | c5344   | pyrI | aspartate carbamoyltransferase regulatory subunit                          |
| i02_4849  | c5345   | pyrB | aspartate carbamoyltransferase catalytic subunit                           |
| i02_4850  | c5502   | pyrL | pyrBI operon leader peptide                                                |
| i02_4851  | c5346   | /    | hypothetical protein                                                       |
| i02_4852  | c5347   | /    | hypothetical protein                                                       |
| i02_4853  | c5348   | /    | ornithine carbamoyltransferase                                             |
| i02_4854  | c5349   | /    | carbamate kinase                                                           |
| i02_4855  | c5350   | /    | arginine deiminase                                                         |
| i02_4856  | c5351   | /    | hypothetical protein                                                       |
| i02_4857  | c5352   | yjgK | hypothetical protein                                                       |
| i02_4859  | c5354   | yjgD | hypothetical protein                                                       |
| i02_4858  | c5353   | argI | ornithine carbamoyltransferase subunit F                                   |
| i02_4860  | c5355   | /    | hypothetical protein                                                       |
| i02_4861  | c5356   | /    | hypothetical protein                                                       |
| i02_4861  | c5357   | /    | hypothetical protein                                                       |
| i02_4862  | c5358   | valS | valyl-tRNA synthetase                                                      |
| i02_4863  | c5359   | holC | DNA polymerase III subunit chi                                             |
| i02_4864  | c5360   | pepA | leucyl aminopeptidase                                                      |
|           | c5361   | /    | hypothetical protein                                                       |
| i02_4865  | c5362   | yjgP | hypothetical protein                                                       |
| i02_4866  | c5363   | yjgQ | hypothetical protein                                                       |
| i02_4867  | c5364   | yjgR | hypothetical protein                                                       |
| i02_4868  | c5365   | idnR | L-idonate regulatory protein                                               |
| i02_4869  | c5366   | idnT | Gnt-II system L-idonate transporter                                        |
| i02_4870  | c5367   | idnO | gluconate 5-dehydrogenase                                                  |
| i02_4871  | c5368   | idnD | L-idonate 5-dehydrogenase                                                  |
| i02_4872  | c5369   | idnK | D-gluconate kinase                                                         |
| i02_4873  | c5370   | yjgB | hypothetical protein                                                       |
| i02_4873a | -       | /    | prophage P4 integrase                                                      |
| i02_4874  | -       | /    | HNH nuclease                                                               |
| i02_4874a | -       | /    | conserved hypothetical protein                                             |
| i02_4874b | -       | /    | conserved hypothetical protein                                             |
| i02_4875  | -       | /    | hypothetical protein                                                       |
| i02_4876  | -       | /    | ATPase-like protein                                                        |
| i02_4877  | -       | /    | hypothetical protein                                                       |

| Clone D   | CFT 073 | Gene | Product                                        |
|-----------|---------|------|------------------------------------------------|
| i02_4878  | -       | /    | hypothetical protein                           |
| i02_4879  | -       | /    | hypothetical protein                           |
| i02_4880  | -       | /    | predicted protein                              |
| i02_4881  | -       | /    | hypothetical protein                           |
| i02_4882  | -       | /    | transposase IS629                              |
| i02_4883  | -       | /    | hypothetical protein                           |
| i02_4884  | -       | /    | hypothetical protein                           |
| i02_4885  | -       | /    | hypothetical protein                           |
| i02_4885a | -       | /    | antigen 43 precursor (AG43) (Fluffing protein) |
| i02_4885b | -       | /    | conserved hypothetical protein                 |
| i02_4885c | -       | /    | conserved hypothetical protein                 |
| i02_4885d | -       | /    | phospholipase, patatin family                  |
| i02_4886  | -       | /    | hypothetical protein                           |
| i02_4887  | -       | /    | hypothetical protein                           |
| i02_4888  | -       | /    | putative radC-like protein yeeS                |
| i02_4889  | -       | /    | hypothetical protein                           |
| i02_4890  | -       | /    | hypothetical protein                           |
| i02_4891  | c5371   | /    | prophage P4 integrase                          |
| i02_4892  | c5372   | /    | hypothetical protein                           |
| i02_4893  | c5373   | /    | hypothetical protein                           |
| i02_4894  | c5374   | /    | hypothetical protein                           |
|           | c5375   | /    | hypothetical protein                           |
| i02_4895  | c5376   | /    | hypothetical protein                           |
| i02_4896  | c5377   | /    | hypothetical protein                           |
| i02_4897  | c5378   | /    | hypothetical protein                           |
|           | c5380   | /    | hypothetical protein                           |
| i02_4898  | c5379   | /    | hypothetical protein                           |
| i02_4900  | c5381   | /    | hypothetical protein                           |
| i02_4901  | c5382   | /    | hypothetical protein                           |
|           | c5383   | /    | hypothetical protein                           |
| i02_4902  | c5384   | /    | hypothetical protein                           |
| i02_4903  | c5385   | /    | hypothetical protein                           |
| i02_4904  | c5386   | /    | hypothetical protein                           |
| i02_4905  | c5387   | /    | hypothetical protein                           |
| i02_4906  | c5388   | /    | hypothetical protein                           |
| i02_4907  | c5389   | /    | hypothetical protein                           |
| i02_4908  | c5390   | /    | hypothetical protein                           |
| i02_4909  | c5391   | fimB | tyrosine recombinase                           |
| i02_4910  | c5392   | fimE | tyrosine recombinase                           |
| i02_4911  | c5393   | fimA | Type-1 fimbrial protein, A chain precursor     |
| i02_4912  | c5394   | fimI | fimbrin-like protein fimI precursor            |
| i02_4913  | c5395   | fimC | chaperone protein fimC precursor               |
| i02_4914  | c5396   | fimD | Outer membrane usher protein fimD precursor    |
| i02_4915  | c5397   | fimF | FimF protein precursor                         |
|           | c5398   | /    | hypothetical protein                           |
| i02_4916  | c5399   | fimG | FimG protein precursor                         |
| i02_4917  | c5400   | fimH | FimH protein precursor                         |
| i02_4918  | c5401   | gntP | fructuronate transporter                       |
| i02_4919  | c5402   | uxuA | mannonate dehydratase                          |
| i02_4920  | c5403   | uxuB | D-mannonate oxidoreductase                     |
| i02_4921  | c5404   | uxuR | DNA-binding transcriptional repressor UxuR     |
| i02_4922  | c5405   | yjiD | hypothetical protein                           |

| <b>Clone D</b> | <b>CFT 073</b> | <b>Gene</b> | <b>Product</b>                                 |
|----------------|----------------|-------------|------------------------------------------------|
| i02_4923       | c5406          | /           | hypothetical protein                           |
| i02_4924       | c5407          | yjiE        | putative DNA-binding transcriptional regulator |
| i02_4925       | c5408          | iadA        | isoaspartyl dipeptidase                        |
| i02_4926       | c5409          | yjiG        | hypothetical protein                           |
| i02_4927       | c5410          | yjiH        | hypothetical protein                           |
| i02_4928       | c5411          | /           | hypothetical protein                           |
| i02_4929       |                | yjiI        | 2'-phosphotransferase-like protein             |
| i02_4930       |                | /           | hypothetical protein                           |
| i02_4931       | c5414          | yjiJ        | hypothetical protein                           |
| i02_4932       | c5415          | yjiK        | hypothetical protein                           |
| i02_4933       | c5416          | /           | hypothetical protein                           |
| i02_4934       | c5417          | yjiL        | hypothetical protein                           |
| i02_4935       | c5418          | yjiM        | hypothetical protein                           |
| i02_4936       | c5419          | yjiN        | hypothetical protein                           |
| i02_4937       | c5420          | yfcl        | hypothetical protein                           |
| i02_4938       | c5421          | /           | hypothetical protein                           |
| i02_4939       | c5422          | yjiW        | endoribonuclease SymE                          |
| i02_4940       | c5423          | /           | putative restriction modification enzyme S     |
| i02_4941       | c5424          | /           | putative restriction modification enzyme M     |
| i02_4942       | c5425          | /           | putative restriction modification enzyme R     |
| i02_4943       | c5426          | /           | hypothetical protein                           |
| i02_4944       | c5427          | yjiA        | putative GTP-binding protein YjiA              |
| i02_4945       | c5428          | /           | hypothetical protein                           |
| i02_4946       | c5429          | yjiY        | hypothetical protein                           |
| i02_4947       | c5430          | tsr         | methyl-accepting chemotaxis protein I          |
| i02_4948       | c5431          | /           | hypothetical protein                           |
| i02_4949       | c5432          | /           | hypothetical protein                           |
| i02_4950       | c5433          | /           | putative C4-dicarboxylate-binding periplasmic  |
| i02_4950       | c5434          | /           | hypothetical protein                           |
| i02_4951       | c5435          | /           | putative Na(+)/H(+) exchanger yjcE             |
| i02_4952       | c5436          | yjjM        | hypothetical protein                           |
| i02_4953       | c5437          | /           | hypothetical protein                           |
| i02_4954       | c5438          | mdoB        | phosphoglycerol transferase I                  |
| i02_4955       | c5439          | yjjA        | hypothetical protein                           |
| i02_4956       | c5440          | dnaC        | DNA replication protein DnaC                   |
| i02_4957       | c5441          | dnaT        | primosomal protein DnaI                        |
| i02_4958       | c5442          | yjjB        | hypothetical protein                           |
| i02_4959       | c5443          | yjjP        | hypothetical protein                           |
| i02_4960       | c5444          | yjjQ        | hypothetical protein                           |
| i02_4961       | c5445          | bglJ        | DNA-binding transcriptional activator BglJ     |
| i02_4962       | c5446          | fhuF        | ferric iron reductase involved in ferric       |
| i02_4963       | c5447          | /           | hypothetical protein                           |
| i02_4964       | c5448          | /           | hypothetical protein                           |
| i02_4965       | c5449          | /           | hypothetical protein                           |
| i02_4966       | c5450          | rsmC        | 16S ribosomal RNA m2G1207 methyltransferase    |
| i02_4967       | c5452          | holD        | DNA polymerase III subunit psi                 |
| i02_4968       | c5453          | rimI        | ribosomal-protein-alanine N-acetyltransferase  |
| i02_4969       | c5454          | yjjG        | nucleotidase                                   |
|                | c5455          | /           | hypothetical protein                           |
| i02_4970       | c5456          | prfC        | peptide chain release factor 3                 |
| i02_4971       | c5457          | osmY        | periplasmic protein                            |
|                | c5458          | /           | hypothetical protein                           |

| Clone D  | CFT 073 | Gene | Product                                      |
|----------|---------|------|----------------------------------------------|
| i02_4972 | c5459   | /    | hypothetical protein                         |
| i02_4973 | c5460   | yjjU | hypothetical protein                         |
| i02_4974 | c5461   | yjjV | putative deoxyribonuclease YjjV              |
| i02_4975 | c5462   | yjjW | hypothetical protein                         |
| i02_4977 | c5464   | /    | hypothetical protein                         |
| i02_4976 | c5463   | yjjI | hypothetical protein                         |
| i02_4978 | c5465   | deoC | deoxyribose-phosphate aldolase               |
| i02_4979 | c5466   | deoA | thymidine phosphorylase                      |
| i02_4980 | c5467   | deoB | phosphopentomutase                           |
| i02_4981 | c5468   | deoD | purine nucleoside phosphorylase              |
| -        | c5469   | /    | transposase                                  |
| i02_4982 | c5470   | yjjJ | hypothetical protein                         |
| i02_4983 | c5471   | lplA | lipoate-protein ligase A                     |
| i02_4984 | c5472   | smp  | hypothetical protein                         |
| i02_4985 | c5473   | serB | phosphoserine phosphatase                    |
| i02_4986 | c5474   | sms  | DNA repair protein RadA                      |
| i02_4987 | c5475   | nadR | nicotinamide-nucleotide adenyltransferase    |
| i02_4988 | c5476   | /    | hypothetical protein                         |
| i02_4989 | c5477   | /    | hypothetical protein                         |
| i02_4991 |         | /    | hypothetical protein                         |
| i02_4990 | c5478   | yjjK | putative ABC transporter ATP-binding protein |
| i02_4992 | c5479   | slt  | lytic murein transglycosylase                |
| i02_4993 | c5480   | trpR | Trp operon repressor                         |
| i02_4994 | c5481   | yjjX | NTPase                                       |
| i02_4995 | c5482   | gpmB | phosphoglycerate mutase                      |
| i02_4996 | c5483   | rob  | right origin-binding protein                 |
| i02_4997 | c5484   | creA | hypothetical protein                         |
| i02_4998 | c5485   | creB | DNA-binding response regulator CreB          |
| i02_4999 | c5486   | creC | sensory histidine kinase CreC                |
| i02_5000 | c5487   | creD | hypothetical protein                         |
| i02_5001 | c5488   | arcA | two-component response regulator             |
| i02_5002 | c5489   | yjjY | hypothetical protein                         |
| i02_5003 | c5490   | lasT | putative RNA methyltransferase               |

<sup>a</sup> Some genes were not predicted in one genome and left as a blank cell. All insertion or deletion of genes are described as "-". In some cases a gene in one genome was annotated as 2 or more genes in the other genome, and the same gene name appears 2 or more times for a genome. This may be due to mutation to stop codon, frameshift mutation or sequencing errors.
