# Supplementary material for: Rates of Mutation and Host Transmission for an Escherichia coli Clone over 3 Years
Source: PubMed Central journal article supplement (PMC3203180; doi:10.1371/journal.pone.0026907), 2011-10-27
Supplement: pone.0026907.s004.pdf [file pone.0026907.s004.pdf]

**Table S3** Large insertions and deletions. Large indels (more than 20 bp) affecting the genomes are shown with the length (bp), if thought to be an insertion or deletion, the strain affected and the gene or genes affected.

| <b>Indel No.</b> | <b>Lineage</b> | <b>type<sup>a</sup></b> | <b>site<sup>b</sup></b> | <b>size</b> | <b>Name or range</b>               |
|------------------|----------------|-------------------------|-------------------------|-------------|------------------------------------|
| 1                | CFT073         | ins                     | 306                     | 712         | IS1541A-like element               |
| 2                | CFT073         | ins                     | 66919                   | 712         | transposase                        |
| 3                | CFT073         | ins                     | 80507                   | 711         | transposase                        |
| 4                | CFT073         | ins                     | 128856                  | 1313        | hypothetical protein & IS629       |
| 5                | CFT073         | ins                     | 189257                  | 711         | transposase                        |
| 6                | clone D        | del                     | 232336                  | 113         | 16S rRNA                           |
| 7                | clone D        | del                     | 232516                  | 135         | tRNA                               |
| 8                | CFT073         | del                     | 232521                  | 149         | tRNA                               |
| 9                | clone D        | ins                     | 248919                  | 10849       | phage-like element (i02_0242-0259) |
| 10               | CFT073         | ins                     | 261942                  | 2418        | ISEc10                             |
| 11               | clone D        | ins                     | 294117                  | 27          | intergenic                         |
| 12               | CFT073         | ins                     | 335584                  | 1313        | IS629                              |
| 13               | ?              | indel                   | 345655                  | 1005        | c0363                              |
| 14               | clone D        | del                     | 416025                  | 271         | intergenic                         |
| 15               | clone D        | del                     | 431892                  | 21          | intergenic                         |
| 16               | CFT073         | ins                     | 543733                  | 711         | IS1541A-like element               |
| 17               | CFT073         | ins                     | 750473                  | 712         | IS1541A-like element               |
| 18               | CFT073         | del                     | 761604                  | 63          | intergenic                         |
| 19               | clone D        | del                     | 799684                  | 45          | tolA                               |
| 20               | CFT073         | ins                     | 908998                  | 33481       | prophage(c0932-c0979)              |
| 21               | CFT073         | ins                     | 1179088                 | 1313        | IS629 & hypothetical protein       |
| 22               | CFT073         | ins                     | 1199719                 | 2416        | ISEc10                             |
| 23               | CFT073         | ins                     | 1202231                 | 711         | IS1541A-like element               |
| 24               | CFT073         | ins                     | 1273890                 | 711         | IS1541A-like element               |
| 25               | CFT073         | ins                     | 1303018                 | 711         | IS1541A-like element               |
| 26               | CFT073         | ins                     | 1338505                 | 11452       | phage-like element(c1481-c1507)    |
| 27               | CFT073         | ins                     | 1347911                 | 1313        | hypothetical protein & IS629       |
| 28               | CFT073         | ins                     | 1350800                 | 2416        | hypothetical proteins              |
| 29               | CFT073         | ins                     | 1361387                 | 1313        | hypothetical protein & IS629       |
| 30               | CFT073         | ins                     | 1518294                 | 711         | IS1541A-like element               |
| 31               | clone D        | del                     | 1608735                 | 589         | pseudogene                         |
| 32               | CFT073         | del                     | 1608792                 | 441         | i02_1656                           |
| 33               | CFT073         | ins                     | 1723367                 | 996         | oprR                               |
| 34               | CFT073         | del                     | 1758310                 | 26          | intergenic                         |
| 35               | CFT073         | ins                     | 2090661                 | 712         | IS1541A-like element               |
| 36               | CFT073         | ins                     | 2173095                 | 711         | IS1541A-like element               |
| 37               | clone D        | del                     | 2281154                 | 74          | intergenic                         |
| 38               | CFT073         | ins                     | 2284297                 | 2415        | ISEc10                             |
| 39               | CFT073         | del                     | 2344530                 | 193         | intergenic                         |

| Indel No. | Lineage | type <sup>a</sup> | site <sup>b</sup> | size  | Name or range                                                           |
|-----------|---------|-------------------|-------------------|-------|-------------------------------------------------------------------------|
| 40        | CFT073  | ins               | 2406118           | 711   | IS1541A-like element                                                    |
| 41        | CFT073  | ins               | 2421164           | 712   | IS1541A-like element                                                    |
| 42        | clone D | del               | 2736465           | 115   | tRNA                                                                    |
| 43        | clone D | del               | 2739276           | 122   | tRNA                                                                    |
| 44        | CFT073  | ins               | 2929246           | 106   | tRNA                                                                    |
| 45        | CFT073  | ins               | 2955545           | 48433 | prophage (c3143-c3206)                                                  |
| 46        | CFT073  | ins               | 3172163           | 711   | IS1541A-like element                                                    |
| 47        | CFT073  | ins               | 3217704           | 711   | IS1541A-like element                                                    |
| 48        | ?       | indel             | 3296661           | 1149  | insA & insB<br>part of genomic island containing                        |
| 49        | CFT073  | ins               | 3297810           | 19184 | hlyDBAC (c3559-c3581)                                                   |
| 50        | clone D | ins               | 3298577           | 1234  | hypothetical protein & insA & insB<br>part of genomic island containing |
| 51        | clone D | del               | 3299811           | 7868  | papHCDJKEFG (c3583-3591)                                                |
| 52        | clone D | ins               | 3306522           | 393   | intergenic                                                              |
| 53        | clone D | ins               | 3313135           | 2917  | transposases & hypothetical proteins                                    |
| 54        | CFT073  | ins               | 3316052           | 2884  | hypothetical proteins                                                   |
| 55        | clone D | ins               | 3316634           | 2490  | transposases & hypothetical proteins                                    |
| 56        | clone D | ins               | 3326382           | 23    | intergenic                                                              |
| 57        | clone D | ins               | 3333568           | 1334  | insC & insD                                                             |
| 58        | CFT073  | ins               | 3359352           | 6892  | hypothetical proteins                                                   |
| 59        | clone D | ins               | 3377402           | 8335  | kfiB-D                                                                  |
| 60        | CFT073  | ins               | 3385737           | 7970  | hypothetical proteins                                                   |
| 61        | clone D | del               | 3387380           | 116   | intergenic<br>ETEC-like type II secretion gene cluster                  |
| 62        | CFT073  | del               | 3390277           | 14762 | (gspJIHGFEDC)                                                           |
| 63        | CFT073  | ins               | 3390277           | 1618  | transposase                                                             |
| 64        | CFT073  | del               | 3725965           | 276   | tRNA                                                                    |
| 65        | clone D | del               | 3725965           | 30    | intergenic                                                              |
| 66        | CFT073  | del               | 3729401           | 202   | tRNA                                                                    |
| 67        | clone D | del               | 3729603           | 214   | tRNA                                                                    |
| 68        | clone D | ins               | 4146811           | 16963 | genomic island (i02_4155-4171)                                          |
| 69        | CFT073  | ins               | 4163774           | 66080 | genomic island (c4492-c4579)                                            |
| 70        | CFT073  | del               | 4384698           | 290   | tRNA                                                                    |
| 71        | clone D | del               | 4384698           | 373   | tRNA                                                                    |
| 72        | CFT073  | del               | 4522479           | 280   | tRNA                                                                    |
| 73        | clone D | del               | 4522759           | 274   | tRNA                                                                    |
| 74        | clone D | del               | 4652694           | 43    | intergenic                                                              |
| 75        | CFT073  | ins               | 4741230           | 52136 | genomic island (c5143-c5216)                                            |
| 76        | clone D | ins               | 4885076           | 38017 | genomic island (i02_4873a-4890)                                         |
| 77        | CFT073  | ins               | 5018007           | 712   | IS1541A-like element                                                    |

<sup>a</sup>, ins, insertion; del, deletion; indel: deletion or insertion

<sup>b</sup>, Using the clone D\_i2 genome as reference. For indels the base indicated is the base before the insertion or deletion.
