# Supplementary material for: Rates of Mutation and Host Transmission for an Escherichia coli Clone over 3 Years
Source: PubMed Central journal article supplement (PMC3203180; doi:10.1371/journal.pone.0026907), 2011-10-27
Supplement: pone.0026907.s005.pdf [file pone.0026907.s005.pdf]

| Indel No. | Clone D <sup>a</sup> | CFT073 <sup>a</sup> | Lineage | type | site <sup>b</sup> | size  | Inferred<br>ancestral <sup>c</sup> | Support<br>level <sup>d</sup> | ED1a | 536 | S88 | APEC O1 | UT189 | E2348/69 | ATCC8739 | K-12 | HS | SMS3-5 | IAI39 | E24377A | SE11 | 55989 | IAI1 | Sakai | UMN026 | B4 Sb227 | F5 8401 | SS Ss046 | D1 Sd197<br>B18 | BS512<br>F2a 2457T | F2a 301 |   |   |   |
|-----------|----------------------|---------------------|---------|------|-------------------|-------|------------------------------------|-------------------------------|------|-----|-----|---------|-------|----------|----------|------|----|--------|-------|---------|------|-------|------|-------|--------|----------|---------|----------|-----------------|--------------------|---------|---|---|---|
| 21        | -                    | +                   | CFT073  | ins  | 1179088           | 1313  | -                                  | ++++                          | /    | -   | /   | -       | -     | -        | /        | -    | /  | -      | /     | /       | /    | -     | /    | /     | /      | /        | /       | /        | -               | /                  | /       | - |   |   |
| 22        | -                    | +                   | CFT073  | ins  | 1199719           | 2416  | -                                  | ++++                          | -    | -   | -   | -       | -     | -        | /        | -    | /  | -      | -     | -       | -    | /     | -    | /     | -      | -        | -       | /        | /               | -                  | -       | - | - |   |
| 23        | -                    | +                   | CFT073  | ins  | 1202231           | 711   | -                                  | ++++                          | -    | -   | -   | -       | -     | -        | /        | -    | /  | -      | -     | -       | -    | /     | -    | /     | -      | -        | -       | /        | /               | -                  | /       | - | - |   |
| 24        | -                    | +                   | CFT073  | ins  | 1273890           | 711   | -                                  | ++++                          | -    | -   | -   | -       | -     | -        | -        | -    | -  | -      | -     | -       | -    | -     | -    | -     | -      | -        | -       | -        | -               | -                  | -       | - | - |   |
| 25        | -                    | +                   | CFT073  | ins  | 1303018           | 711   | -                                  | ++++                          | -    | /   | -   | -       | -     | -        | /        | /    | /  | /      | /     | /       | /    | /     | -    | /     | -      | /        | /       | -        | -               | -                  | -       | - | - |   |
| 26        | -                    | +                   | CFT073  | ins  | 1338505           | 11452 | -                                  | ++++                          | -    | -   | -   | -       | -     | -        | -        | -    | -  | -      | -     | -       | -    | -     | -    | -     | -      | -        | -       | -        | -               | -                  | -       | - | - |   |
| 27        | -                    | +                   | CFT073  | ins  | 1347911           | 1313  | -                                  | ++++                          | /    | -   | -   | -       | -     | -        | /        | /    | /  | /      | /     | /       | /    | -     | /    | /     | -      | -        | -       | /        | /               | /                  | /       | / | - |   |
| 28        | -                    | +                   | CFT073  | ins  | 1350800           | 2416  | -                                  | ++++                          | -    | -   | -   | -       | -     | /        | /        | /    | /  | /      | -     | /       | /    | -     | -    | -     | -      | -        | /       | /        | /               | /                  | /       | / | / |   |
| 29        | -                    | +                   | CFT073  | ins  | 1361387           | 1313  | -                                  | ++++                          | -    | /   | -   | -       | -     | -        | /        | -    | /  | /      | -     | +       | -    | -     | -    | -     | -      | -        | -       | /        | /               | /                  | /       | / | / |   |
| 30        | -                    | +                   | CFT073  | ins  | 1518294           | 711   | -                                  | ++++                          | -    | -   | -   | -       | -     | -        | -        | -    | -  | -      | -     | -       | -    | -     | -    | -     | -      | -        | -       | -        | -               | -                  | -       | - | - |   |
| 31        | -                    | +                   | clone D | del  | 1608735           | 589   | +                                  | ++++                          | +    | +   | +   | +       | +     | /        | +        | +    | +  | /      | /     | /       | /    | /     | /    | /     | /      | /        | -       | /        | /               | /                  | /       | / | / |   |
| 32        | +                    | -                   | CFT073  | del  | 1608792           | 441   | +                                  | ++++                          | +    | +   | +   | +       | +     | /        | +        | +    | +  | /      | /     | /       | /    | /     | /    | /     | /      | /        | /       | /        | /               | -                  | /       | / | / |   |
| 33        | -                    | +                   | CFT073  | ins  | 1723367           | 996   | -                                  | ++++                          | /    | -   | -   | -       | -     | -        | /        | -    | /  | /      | /     | /       | /    | /     | /    | -     | /      | /        | -       | /        | /               | /                  | /       | / | - |   |
| 34        | +                    | -                   | CFT073  | del  | 1758310           | 26    | +                                  | ++++                          | +    | +   | +   | +       | +     | +        | +        | +    | +  | +      | +     | +       | +    | +     | +    | +     | +      | +        | /       | +        | /               | +                  | /       | + | + |   |
| 35        | -                    | +                   | CFT073  | ins  | 2090661           | 712   | -                                  | ++++                          | -    | /   | -   | -       | -     | -        | -        | -    | -  | -      | -     | -       | -    | -     | -    | -     | -      | -        | -       | -        | -               | -                  | -       | - | - |   |
| 36        | -                    | +                   | CFT073  | ins  | 2173095           | 711   | -                                  | ++++                          | -    | -   | -   | -       | -     | /        | /        | /    | /  | /      | -     | /       | /    | -     | /    | /     | -      | /        | /       | /        | /               | /                  | /       | / | / | / |
| 37        | -                    | +                   | clone D | del  | 2281154           | 74    | +                                  | ++++                          | +    | +   | +   | +       | +     | /        | /        | /    | -  | +      | /     | +       | /    | +     | /    | /     | +      | /        | /       | /        | /               | /                  | /       | / | / |   |
| 38        | -                    | +                   | CFT073  | ins  | 2284297           | 2415  | -                                  | ++++                          | /    | -   | -   | -       | -     | /        | /        | /    | /  | -      | /     | -       | -    | -     | /    | /     | -      | -        | /       | /        | /               | /                  | -       | / | - |   |
| 39        | +                    | -                   | CFT073  | del  | 2344530           | 193   | +                                  | ++                            | +    | +   | -   | -       | +     | -        | -        | +    | /  | -      | /     | -       | -    | -     | +    | +     | -      | +        | -       | /        | /               | -                  | -       | + |   |   |
| 40        | -                    | +                   | CFT073  | ins  | 2406118           | 711   | -                                  | ++++                          | /    | -   | -   | -       | -     | -        | -        | -    | -  | -      | -     | -       | -    | -     | -    | -     | -      | -        | -       | -        | -               | -                  | -       | - | - |   |
| 41        | -                    | +                   | CFT073  | ins  | 2421164           | 712   | -                                  | ++++                          | -    | -   | -   | -       | -     | -        | -        | -    | -  | -      | -     | -       | -    | -     | -    | -     | -      | -        | -       | -        | -               | -                  | -       | - | - |   |
| 42        | -                    | +                   | clone D | del  | 2736465           | 115   | +                                  | ++++                          | +    | +   | +   | +       | +     | +        | +        | +    | +  | +      | +     | +       | +    | +     | +    | +     | +      | +        | +       | +        | +               | +                  | +       | + | + |   |
| 43        | -                    | +                   | clone D | del  | 2739276           | 122   | +                                  | ++                            | +    | +   | +   | +       | +     | +        | +        | +    | +  | +      | +     | +       | +    | +     | +    | +     | +      | +        | +       | -        | +               | -                  | +       | - | - |   |
| 44        | -                    | +                   | CFT073  | ins  | 2929246           | 106   | -                                  | ++                            | -    | +   | -   | -       | -     | -        | +        | +    | +  | -      | -     | +       | +    | +     | +    | +     | -      | -        | -       | -        | -               | -                  | +       | - | - |   |
| 45        | -                    | +                   | CFT073  | ins  | 2955545           | 48433 | -                                  | ++                            | -    | -   | -   | -       | -     | /        | +        | -    | -  | -      | -     | -       | -    | -     | -    | -     | -      | -        | -       | /        | /               | -                  | -       | - | - |   |



| Indel No. | Clone D <sup>a</sup> | CFT073 <sup>a</sup> | Lineage | type | site <sup>b</sup> | size  | Inferred ancestral <sup>c</sup> | Support level <sup>d</sup> | ED1a | 536 | S88 | APEC O1 | UTI89 | E2348/69 | ATCC8739 | K-12 | HS | SMS3-5 | IAI39 | E24377A | SE11 | 55989 | IAI1 | Sakai | UMN026 | B4 Sb227 | F5 8401 | SS Ss046 | D1 Sd197 B18 | BS512 | F2a 2457T | F2a 301 |   |
|-----------|----------------------|---------------------|---------|------|-------------------|-------|---------------------------------|----------------------------|------|-----|-----|---------|-------|----------|----------|------|----|--------|-------|---------|------|-------|------|-------|--------|----------|---------|----------|--------------|-------|-----------|---------|---|
| 71        | -                    | +                   | clone D | del  | 4384698           | 373   | +                               | ++++                       | +    | +   | +   | +       | +     | +        | +        | +    | +  | +      | +     | +       | +    | +     | +    | +     | +      | +        | -       | +        | +            | +     | +         | +       |   |
| 72        | +                    | -                   | CFT073  | del  | 4522479           | 280   | +                               | ++++                       | +    | +   | +   | +       | +     | +        | +        | +    | +  | +      | +     | +       | +    | +     | +    | +     | +      | +        | -       | +        | +            | +     | +         | +       |   |
| 73        | -                    | +                   | clone D | del  | 4522759           | 274   | +                               | ++++                       | +    | +   | +   | +       | +     | +        | +        | +    | +  | +      | +     | +       | +    | +     | +    | +     | +      | +        | +       | +        | +            | +     | +         | +       | + |
| 74        | -                    | +                   | clone D | del  | 4652694           | 43    | +                               | ++++                       | +    | +   | +   | +       | +     | +        | +        | +    | +  | +      | +     | +       | +    | +     | +    | +     | -      | +        | +       | +        | +            | +     | +         | +       | + |
| 75        | -                    | +                   | CFT073  | ins  | 4741230           | 52136 | -                               | ++++                       | -    | /   | /   | -       | /     | -        | -        | -    | -  | -      | -     | -       | -    | -     | -    | -     | -      | -        | -       | -        | -            | -     | -         | -       | - |
| 76        | +                    | -                   | clone D | ins  | 4885076           | 38017 | -                               | ++++                       | -    | -   | -   | -       | -     | -        | /        | -    | -  | -      | -     | -       | /    | -     | -    | -     | -      | -        | /       | -        | /            | -     | /         | -       | - |
| 77        | -                    | +                   | CFT073  | ins  | 5018007           | 712   | -                               | ++++                       | -    | -   | -   | -       | -     | -        | /        | -    | -  | -      | -     | -       | -    | -     | -    | -     | -      | -        | -       | -        | -            | -     | -         | -       | - |

<sup>a</sup> "+" indicates the block present, "-" indicates the block absent, "/" indicates the block and nearby sequence absent.

<sup>b</sup> Using the clone D\_i2 genome as reference. For indels the base indicated is the base before the insertion or deletion.

<sup>c</sup> Presence or absence of indel block in clone D/CFT073 ancestor as inferred from outgroup analysis.

<sup>d</sup> Level of support for allocation of indel blocks as given in previous column

"++++" agreement is high-8 or more outgroup strains with expected type and at most 2 with the opposite, and ED1a agrees or site not present

"+++ " agreement good-4 or more outgroup strains with expected type and at most 2 with the opposite, and ED1a agrees or site not present

"++" agreement in ED1a regardless of situation with other outgroup strains

"+" no conflict but very limited support as either the block and nearby sequence absent in ED1a, and/or outgroup support less than given above

"+/-" no conflict but no support (the block and its nearby sequence not present in any outgroup OR both alternative lineages supported equally).
