# Supplementary material for: Rates of Mutation and Host Transmission for an Escherichia coli Clone over 3 Years
Source: PubMed Central journal article supplement (PMC3203180; doi:10.1371/journal.pone.0026907), 2011-10-27
Supplement: pone.0026907.s006.pdf [file pone.0026907.s006.pdf]

**Table S5** Small insertions and deletions. Small indels (not more than 20 bp) affecting the genomes are shown with the length (bp), if thought to be an insertion or deletion, the strain affected and the genes affected.

| Indel No. | Lineage | type <sup>a</sup> | site <sup>b</sup> | size | Locus_tag  | Gene  |
|-----------|---------|-------------------|-------------------|------|------------|-------|
| 78        | CFT073  | del               | 45543             | 1    | i02_0044   | fixB  |
| 79        | clone D | del               | 72763             | 1    | intergenic |       |
| 80        | CFT073  | ins               | 133186            | 1    | i02_0131   | aceF  |
| 81        | clone D | ins               | 144870            | 6    | i02_0139   | yackK |
| 82        | clone D | ins               | 154523            | 12   | i02_0149   | yadD  |
| 83        | CFT073  | ins               | 155811            | 1    | i02_0151   | panC  |
| 84        | CFT073  | ins               | 199713            | 1    | i02_0193   | dxr   |
| 85        | CFT073  | del               | 227763            | 3    | i02_0220   | metQ  |
| 86        | CFT073  | del               | 232061            | 1    | rRNA_001   | rrs   |
| 87        | CFT073  | ins               | 232066            | 1    | rRNA_001   | rrs   |
| 88        | CFT073  | ins               | 233460            | 1    | rRNA_002   | rrl   |
| 89        | CFT073  | del               | 233464            | 3    | rRNA_002   | rrl   |
| 90        | CFT073  | ins               | 233469            | 3    | rRNA_002   | rrl   |
| 91        | CFT073  | ins               | 234089            | 1    | rRNA_002   | rrl   |
| 92        | CFT073  | del               | 234785            | 1    | rRNA_002   | rrl   |
| 93        | CFT073  | del               | 234789            | 1    | rRNA_002   | rrl   |
| 94        | CFT073  | ins               | 272526            | 1    | i02_0280   |       |
| 95        | CFT073  | ins               | 273259            | 1    | i02_0281   |       |
| 96        | ?       | indel             | 327228            | 1    | intergenic |       |
| 97        | ?       | indel             | 327823            | 1    | intergenic |       |
| 98        | ?       | indel             | 347908            | 1    | i02_0343   |       |
| 99        | clone D | ins               | 376418            | 2    | i02_0372   |       |
| 100       | CFT073  | ins               | 390718            | 1    | intergenic |       |
| 101       | CFT073  | ins               | 390903            | 1    | i02_0391   |       |
| 102       | CFT073  | del               | 390967            | 1    | i02_0391   |       |
| 103       | CFT073  | ins               | 390984            | 1    | i02_0391   |       |
| 104       | CFT073  | del               | 391060            | 1    | i02_0391   |       |
| 105       | CFT073  | ins               | 416956            | 1    | intergenic |       |
| 106       | CFT073  | ins               | 431814            | 1    | i02_0427   |       |
| 107       | CFT073  | ins               | 431828            | 1    | i02_0427   |       |
| 108       | CFT073  | ins               | 453588            | 1    | intergenic |       |
| 109       | CFT073  | del               | 453852            | 1    | i02_0444   | lacI  |
| 110       | CFT073  | ins               | 453931            | 1    | i02_0444   | lacI  |
| 111       | CFT073  | ins               | 593588            | 1    | i02_0588   | ybbM  |
| 112       | CFT073  | ins               | 599774            | 1    | i02_0594   | ybbB  |
| 113       | CFT073  | ins               | 626234            | 1    | i02_0618   | ybcI  |
| 114       | CFT073  | del               | 793305            | 1    | i02_0779   |       |
| 115       | CFT073  | ins               | 793475            | 1    | i02_0780   |       |

| Indel No. | Lineage | type <sup>a</sup> | site <sup>b</sup> | size | Locus_tag  | Gene |
|-----------|---------|-------------------|-------------------|------|------------|------|
| 116       | CFT073  | ins               | 802982            | 1    | i02_0791   | ybgF |
| 117       | CFT073  | ins               | 942703            | 1    | i02_0931   |      |
| 118       | CFT073  | ins               | 970076            | 1    | i02_0953   |      |
| 119       | CFT073  | ins               | 986199            | 1    | i02_0965   | lpxK |
| 120       | CFT073  | del               | 1066831           | 1    | i02_1039   | agp  |
| 121       | CFT073  | ins               | 1066931           | 1    | i02_1039   | agp  |
| 122       | CFT073  | ins               | 1081238           | 1    | i02_1055   |      |
| 123       | CFT073  | ins               | 1129853           | 1    | intergenic |      |
| 124       | ?       | indel             | 1132746           | 1    | intergenic |      |
| 125       | CFT073  | ins               | 1141301           | 1    | i02_1117   |      |
| 126       | CFT073  | ins               | 1203554           | 1    | i02_1181   | ycdW |
| 127       | CFT073  | ins               | 1232838           | 1    | i02_1220   |      |
| 128       | CFT073  | ins               | 1232865           | 1    | i02_1220   |      |
| 129       | CFT073  | ins               | 1232932           | 1    | i02_1220   |      |
| 130       | CFT073  | ins               | 1256746           | 1    | i02_1247   |      |
| 131       | CFT073  | ins               | 1256789           | 1    | i02_1247   |      |
| 132       | CFT073  | ins               | 1256798           | 1    | i02_1247   |      |
| 133       | CFT073  | del               | 1259736           | 1    | i02_1250   | pabC |
| 134       | CFT073  | ins               | 1259830           | 1    | i02_1251   | yceG |
| 135       | CFT073  | ins               | 1344697           | 1    | i02_1357   |      |
| 136       | CFT073  | del               | 1346650           | 12   | intergenic |      |
| 137       | CFT073  | ins               | 1358441           | 1    | i02_1383   |      |
| 138       | CFT073  | ins               | 1358461           | 1    | i02_1383   |      |
| 139       | CFT073  | ins               | 1358472           | 1    | i02_1383   |      |
| 140       | CFT073  | ins               | 1358524           | 1    | i02_1383   |      |
| 141       | CFT073  | ins               | 1358753           | 1    | i02_1384   |      |
| 142       | CFT073  | del               | 1378275           | 1    | i02_1415   |      |
| 143       | CFT073  | del               | 1378427           | 1    | i02_1415   |      |
| 144       | CFT073  | del               | 1378444           | 1    | i02_1415   |      |
| 145       | CFT073  | del               | 1378515           | 1    | i02_1415   |      |
| 146       | CFT073  | del               | 1393522           | 1    | i02_1430   | sitA |
| 147       | CFT073  | del               | 1393546           | 1    | i02_1430   | sitA |
| 148       | CFT073  | del               | 1393554           | 1    | i02_1430   | sitA |
| 149       | CFT073  | del               | 1393563           | 1    | i02_1430   | sitA |
| 150       | CFT073  | del               | 1393615           | 1    | i02_1430   | sitA |
| 151       | CFT073  | del               | 1393636           | 1    | i02_1430   | sitA |
| 152       | CFT073  | del               | 1529699           | 1    | i02_1580   | pyrF |
| 153       | clone D | del               | 1541419           | 1    | i02_1593   |      |
| 154       | CFT073  | ins               | 1649103           | 1    | i02_1691   | ydcV |
| 155       | CFT073  | ins               | 1654282           | 1    | i02_1701   | yncD |
| 156       | ?       | indel             | 1661875           | 1    | i02_1709   |      |
| 157       | ?       | indel             | 1662780           | 1    | intergenic |      |
| 158       | CFT073  | del               | 1668910           | 1    | intergenic |      |
| 159       | CFT073  | del               | 1670104           | 1    | i02_1717   |      |

| Indel No. | Lineage | type <sup>a</sup> | site <sup>b</sup> | size | Locus_tag  | Gene |
|-----------|---------|-------------------|-------------------|------|------------|------|
| 160       | CFT073  | del               | 1688286           | 3    | intergenic |      |
| 161       | CFT073  | ins               | 1693716           | 1    | i02_1740   |      |
| 162       | CFT073  | ins               | 1694715           | 1    | i02_1740   |      |
| 163       | CFT073  | del               | 1701417           | 1    | intergenic |      |
| 164       | CFT073  | ins               | 1724309           | 1    | i02_1761   | hipA |
| 165       | CFT073  | ins               | 1895916           | 1    | i02_1932   | pheT |
| 166       | clone D | ins               | 1961664           | 1    | intergenic |      |
| 167       | clone D | ins               | 1961686           | 1    | intergenic |      |
| 168       | CFT073  | ins               | 2010211           | 1    | intergenic |      |
| 169       | CFT073  | ins               | 2010225           | 3    | intergenic |      |
| 170       | CFT073  | ins               | 2010257           | 1    | intergenic |      |
| 171       | CFT073  | ins               | 2025584           | 1    | i02_2078   | purK |
| 172       | CFT073  | del               | 2025609           | 1    | i02_2078   | purK |
| 173       | clone D | ins               | 2071197           | 6    | i02_2126   | yecG |
| 174       | clone D | del               | 2148157           | 1    | intergenic |      |
| 175       | CFT073  | del               | 2158529           | 1    | intergenic |      |
| 176       | clone D | ins               | 2173925           | 9    | i02_2241   |      |
| 177       | CFT073  | ins               | 2177218           | 1    | i02_2242   |      |
| 178       | CFT073  | del               | 2180042           | 1    | i02_2242   |      |
| 179       | CFT073  | del               | 2180052           | 2    | i02_2242   |      |
| 180       | CFT073  | del               | 2180060           | 2    | i02_2242   |      |
| 181       | CFT073  | del               | 2187699           | 1    | i02_2246   |      |
| 182       | clone D | del               | 2190262           | 1    | intergenic |      |
| 183       | CFT073  | del               | 2194430           | 1    | i02_2251   |      |
| 184       | CFT073  | del               | 2194446           | 1    | i02_2251   |      |
| 185       | CFT073  | ins               | 2212027           | 1    | i02_2264   |      |
| 186       | CFT073  | ins               | 2249329           | 1    | i02_2279   |      |
| 187       | CFT073  | del               | 2255272           | 16   | intergenic |      |
| 188       | CFT073  | ins               | 2272088           | 1    | intergenic |      |
| 189       | CFT073  | ins               | 2272119           | 1    | intergenic |      |
| 190       | CFT073  | ins               | 2272141           | 1    | intergenic |      |
| 191       | CFT073  | ins               | 2281124           | 1    | intergenic |      |
| 192       | clone D | del               | 2289140           | 1    | i02_2318   |      |
| 193       | clone D | del               | 2297026           | 1    | intergenic |      |
| 194       | CFT073  | del               | 2362248           | 1    | i02_2386   |      |
| 195       | CFT073  | del               | 2362290           | 1    | i02_2386   |      |
| 196       | CFT073  | del               | 2362303           | 1    | i02_2386   |      |
| 197       | CFT073  | del               | 2362896           | 1    | i02_2387   |      |
| 198       | CFT073  | ins               | 2485913           | 2    | i02_2500   | yeiN |
| 199       | CFT073  | del               | 2658778           | 1    | i02_2665   | yfcJ |
| 200       | CFT073  | del               | 2658814           | 1    | i02_2665   | yfcJ |
| 201       | ?       | indel             | 2686052           | 1    | i02_2693   |      |
| 202       | ?       | indel             | 2686086           | 1    | i02_2693   |      |
| 203       | ?       | indel             | 2686164           | 18   | i02_2693   |      |

| Indel No. | Lineage | type <sup>a</sup> | site <sup>b</sup> | size | Locus_tag  | Gene |
|-----------|---------|-------------------|-------------------|------|------------|------|
| 204       | CFT073  | del               | 2718016           | 1    | i02_2714   |      |
| 205       | CFT073  | del               | 2751344           | 1    | i02_2746   | cysK |
| 206       | CFT073  | ins               | 2751413           | 1    | intergenic |      |
| 207       | CFT073  | ins               | 2751487           | 1    | intergenic |      |
| 208       | CFT073  | ins               | 2752054           | 1    | i02_2749   | ptsI |
| 209       | clone D | ins               | 2852951           | 9    | i02_2837   | pbpC |
| 210       | CFT073  | ins               | 2885705           | 1    | i02_2869   |      |
| 211       | CFT073  | ins               | 2917217           | 1    | intergenic |      |
| 212       | CFT073  | ins               | 2926828           | 1    | rRNA_005   | rri  |
| 213       | CFT073  | del               | 2927085           | 1    | rRNA_005   | rri  |
| 214       | CFT073  | del               | 2927088           | 1    | rRNA_005   | rri  |
| 215       | CFT073  | del               | 2927224           | 13   | rRNA_005   | rri  |
| 216       | clone D | del               | 2927237           | 13   | rRNA_005   | rri  |
| 217       | CFT073  | ins               | 2927786           | 1    | rRNA_005   | rri  |
| 218       | CFT073  | ins               | 2928406           | 3    | rRNA_005   | rri  |
| 219       | CFT073  | del               | 2928408           | 3    | rRNA_005   | rri  |
| 220       | CFT073  | ins               | 2928417           | 1    | rRNA_005   | rri  |
| 221       | clone D | del               | 2928977           | 2    | intergenic |      |
| 222       | CFT073  | del               | 2928978           | 16   | intergenic |      |
| 223       | clone D | del               | 2928978           | 5    | intergenic |      |
| 224       | CFT073  | del               | 2929090           | 13   | intergenic |      |
| 225       | ?       | indel             | 2929104           | 13   | intergenic |      |
| 226       | CFT073  | del               | 2929226           | 20   | intergenic |      |
| 227       | CFT073  | del               | 2929450           | 1    | rRNA_006   | rrs  |
| 228       | CFT073  | del               | 2929550           | 1    | rRNA_006   | rrs  |
| 229       | CFT073  | ins               | 2930036           | 1    | rRNA_006   | rrs  |
| 230       | CFT073  | ins               | 2930063           | 1    | rRNA_006   | rrs  |
| 231       | CFT073  | ins               | 2930079           | 1    | rRNA_006   | rrs  |
| 232       | CFT073  | ins               | 2930102           | 1    | rRNA_006   | rrs  |
| 233       | CFT073  | ins               | 2930210           | 1    | rRNA_006   | rrs  |
| 234       | CFT073  | ins               | 2930267           | 1    | rRNA_006   | rrs  |
| 235       | CFT073  | ins               | 2930289           | 1    | rRNA_006   | rrs  |
| 236       | CFT073  | ins               | 2930305           | 1    | rRNA_006   | rrs  |
| 237       | CFT073  | ins               | 2930427           | 1    | rRNA_006   | rrs  |
| 238       | CFT073  | ins               | 2930474           | 1    | rRNA_006   | rrs  |
| 239       | CFT073  | ins               | 2930497           | 1    | rRNA_006   | rrs  |
| 240       | CFT073  | del               | 2969602           | 1    | i02_2955   |      |
| 241       | CFT073  | del               | 2969636           | 1    | intergenic |      |
| 242       | CFT073  | ins               | 2978621           | 1    | intergenic |      |
| 243       | CFT073  | ins               | 2992303           | 1    | i02_2981   | alaS |
| 244       | CFT073  | ins               | 3004393           | 1    | i02_2995   | norV |
| 245       | CFT073  | ins               | 3038925           | 5    | i02_3034   |      |
| 246       | CFT073  | ins               | 3045109           | 2    | intergenic |      |
| 247       | clone D | del               | 3068496           | 15   | i02_3065   |      |

| Indel No. | Lineage | type <sup>a</sup> | site <sup>b</sup> | size | Locus_tag  | Gene |
|-----------|---------|-------------------|-------------------|------|------------|------|
| 248       | CFT073  | ins               | 3082607           | 1    | i02_3076   | ygcX |
| 249       | CFT073  | ins               | 3082619           | 1    | i02_3076   | ygcX |
| 250       | CFT073  | del               | 3100943           | 1    | i02_3096   | fucK |
| 251       | CFT073  | del               | 3134313           | 1    | i02_3121   |      |
| 252       | CFT073  | del               | 3134331           | 1    | i02_3121   |      |
| 253       | CFT073  | del               | 3261304           | 1    | i02_3238   |      |
| 254       | CFT073  | del               | 3261317           | 1    | i02_3238   |      |
| 255       | CFT073  | del               | 3261350           | 2    | i02_3238   |      |
| 256       | CFT073  | del               | 3261357           | 1    | i02_3238   |      |
| 257       | CFT073  | del               | 3296532           | 12   | i02_3275   |      |
| 258       | ?       | indel             | 3298504           | 1    | intergenic |      |
| 259       | CFT073  | del               | 3300102           | 1    | intergenic |      |
| 260       | clone D | del               | 3300420           | 1    | i02_3284   |      |
| 261       | CFT073  | del               | 3302284           | 1    | i02_3287   |      |
| 262       | ?       | indel             | 3303805           | 8    | i02_3289   |      |
| 263       | CFT073  | del               | 3307276           | 1    | i02_3294   |      |
| 264       | clone D | del               | 3311423           | 5    | intergenic |      |
| 265       | clone D | del               | 3326445           | 1    | intergenic |      |
| 266       | CFT073  | del               | 3336055           | 1    | i02_3326   |      |
| 267       | CFT073  | del               | 3336093           | 1    | i02_3326   |      |
| 268       | CFT073  | del               | 3336107           | 1    | i02_3326   |      |
| 269       | CFT073  | del               | 3336128           | 1    | i02_3326   |      |
| 270       | CFT073  | del               | 3336135           | 1    | i02_3326   |      |
| 271       | CFT073  | del               | 3336142           | 1    | i02_3326   |      |
| 272       | CFT073  | del               | 3336159           | 1    | i02_3326   |      |
| 273       | CFT073  | del               | 3336176           | 1    | i02_3326   |      |
| 274       | CFT073  | del               | 3336181           | 1    | i02_3326   |      |
| 275       | CFT073  | del               | 3336202           | 1    | i02_3326   |      |
| 276       | CFT073  | del               | 3336311           | 1    | i02_3326   |      |
| 277       | CFT073  | ins               | 3337181           | 1    | i02_3328   |      |
| 278       | CFT073  | ins               | 3337246           | 1    | i02_3328   |      |
| 279       | CFT073  | ins               | 3337294           | 1    | i02_3328   |      |
| 280       | clone D | del               | 3344259           | 1    | intergenic |      |
| 281       | CFT073  | ins               | 3344306           | 2    | intergenic |      |
| 282       | CFT073  | ins               | 3344350           | 2    | intergenic |      |
| 283       | CFT073  | ins               | 3344364           | 1    | intergenic |      |
| 284       | CFT073  | ins               | 3344381           | 1    | intergenic |      |
| 285       | CFT073  | del               | 3348189           | 1    | i02_3340   |      |
| 286       | CFT073  | del               | 3348569           | 1    | intergenic |      |
| 287       | CFT073  | del               | 3349813           | 1    | intergenic |      |
| 288       | ?       | indel             | 3350480           | 5    | intergenic |      |
| 289       | ?       | indel             | 3350750           | 14   | intergenic |      |
| 290       | CFT073  | ins               | 3350827           | 7    | i02_3344   |      |
| 291       | ?       | indel             | 3350918           | 6    | intergenic |      |

| Indel No. | Lineage | type <sup>a</sup> | site <sup>b</sup> | size | Locus_tag  | Gene |
|-----------|---------|-------------------|-------------------|------|------------|------|
| 292       | ?       | indel             | 3359351           | 1    | intergenic |      |
| 293       | CFT073  | del               | 3364637           | 1    | i02_3359   |      |
| 294       | clone D | del               | 3364699           | 1    | i02_3359   |      |
| 295       | CFT073  | ins               | 3367923           | 1    | i02_3364   |      |
| 296       | clone D | ins               | 3387223           | 1    | intergenic |      |
| 297       | CFT073  | ins               | 3387673           | 1    | intergenic |      |
| 298       | CFT073  | del               | 3389261           | 1    | i02_3380   | gspL |
| 299       | CFT073  | ins               | 3415674           | 5    | i02_3402   | yghO |
| 300       | clone D | del               | 3415911           | 1    | intergenic |      |
| 301       | CFT073  | ins               | 3450140           | 1    | i02_3439   | yqhG |
| 302       | CFT073  | ins               | 3525549           | 1    | i02_3514   |      |
| 303       | CFT073  | ins               | 3525566           | 1    | i02_3514   |      |
| 304       | CFT073  | del               | 3561339           | 1    | i02_3550   | yqjF |
| 305       | CFT073  | ins               | 3562225           | 2    | i02_3551   | yqjG |
| 306       | CFT073  | ins               | 3567159           | 1    | i02_3557   |      |
| 307       | CFT073  | ins               | 3629787           | 1    | i02_3621   | hflB |
| 308       | CFT073  | del               | 3704908           | 3    | i02_3698   |      |
| 309       | CFT073  | del               | 3726492           | 1    | rRNA_008   | rri  |
| 310       | CFT073  | ins               | 3728030           | 1    | rRNA_008   | rri  |
| 311       | CFT073  | ins               | 3728661           | 1    | rRNA_008   | rri  |
| 312       | CFT073  | ins               | 3729221           | 2    | intergenic |      |
| 313       | CFT073  | del               | 3729227           | 11   | intergenic |      |
| 314       | CFT073  | ins               | 3809580           | 1    | i02_3825   | yhfZ |
| 315       | clone D | del               | 3913324           | 6    | i02_3927   | ftsY |
| 316       | CFT073  | del               | 3933212           | 1    | i02_3950   |      |
| 317       | CFT073  | ins               | 4141078           | 2    | intergenic |      |
| 318       | clone D | ins               | 4145486           | 1    | intergenic |      |
| 319       | clone D | ins               | 4145592           | 1    | intergenic |      |
| 320       | ?       | indel             | 4145717           | 1    | intergenic |      |
| 321       | CFT073  | ins               | 4196764           | 1    | i02_4207   | dgoA |
| 322       | CFT073  | ins               | 4199528           | 1    | i02_4210   |      |
| 323       | CFT073  | del               | 4199642           | 1    | i02_4210   |      |
| 324       | CFT073  | ins               | 4206704           | 1    | i02_4217   | yfgE |
| 325       | CFT073  | ins               | 4266091           | 1    | rRNA_010   | rrs  |
| 326       | CFT073  | ins               | 4267075           | 1    | rRNA_011   | rri  |
| 327       | CFT073  | ins               | 4267207           | 1    | rRNA_011   | rri  |
| 328       | CFT073  | del               | 4267213           | 5    | rRNA_011   | rri  |
| 329       | CFT073  | ins               | 4267220           | 5    | rRNA_011   | rri  |
| 330       | CFT073  | ins               | 4267838           | 1    | rRNA_011   | rri  |
| 331       | CFT073  | ins               | 4268433           | 1    | rRNA_011   | rri  |
| 332       | CFT073  | ins               | 4272677           | 1    | i02_4279   | yifB |
| 333       | CFT073  | ins               | 4308484           | 1    | intergenic |      |
| 334       | clone D | del               | 4310013           | 6    | i02_4315   | hemX |
| 335       | CFT073  | ins               | 4383360           | 1    | rRNA_013   | rrs  |

| Indel No. | Lineage | type <sup>a</sup> | site <sup>b</sup> | size | Locus_tag  | Gene |
|-----------|---------|-------------------|-------------------|------|------------|------|
| 336       | CFT073  | ins               | 4385386           | 1    | rRNA_014   | rrl  |
| 337       | CFT073  | ins               | 4385393           | 1    | rRNA_014   | rrl  |
| 338       | CFT073  | ins               | 4386142           | 1    | rRNA_014   | rrl  |
| 339       | CFT073  | ins               | 4386250           | 1    | rRNA_014   | rrl  |
| 340       | CFT073  | del               | 4394962           | 1    | i02_4402   | xni  |
| 341       | clone D | ins               | 4520822           | 1    | intergenic |      |
| 342       | clone D | del               | 4520842           | 1    | intergenic |      |
| 343       | clone D | del               | 4520877           | 1    | intergenic |      |
| 344       | CFT073  | ins               | 4522159           | 1    | rRNA_016   | rrs  |
| 345       | CFT073  | ins               | 4522197           | 1    | rRNA_016   | rrs  |
| 346       | CFT073  | ins               | 4522200           | 1    | rRNA_016   | rrs  |
| 347       | CFT073  | ins               | 4522223           | 1    | rRNA_016   | rrs  |
| 348       | CFT073  | ins               | 4522239           | 1    | rRNA_016   | rrs  |
| 349       | CFT073  | ins               | 4522262           | 2    | rRNA_016   | rrs  |
| 350       | CFT073  | ins               | 4522267           | 1    | rRNA_016   | rrs  |
| 351       | CFT073  | ins               | 4523421           | 1    | rRNA_017   | rrl  |
| 352       | CFT073  | del               | 4523427           | 2    | rRNA_017   | rrl  |
| 353       | CFT073  | ins               | 4523431           | 1    | rRNA_017   | rrl  |
| 354       | CFT073  | ins               | 4523432           | 1    | rRNA_017   | rrl  |
| 355       | CFT073  | ins               | 4524052           | 1    | rRNA_017   | rrl  |
| 356       | CFT073  | del               | 4524601           | 13   | rRNA_017   | rrl  |
| 357       | CFT073  | ins               | 4524614           | 13   | rRNA_017   | rrl  |
| 358       | CFT073  | del               | 4524748           | 1    | rRNA_017   | rrl  |
| 359       | CFT073  | del               | 4524752           | 1    | rRNA_017   | rrl  |
| 360       | CFT073  | ins               | 4562895           | 1    | intergenic |      |
| 361       | CFT073  | ins               | 4564223           | 1    | rRNA_020   | rrl  |
| 362       | CFT073  | ins               | 4564736           | 1    | rRNA_020   | rrl  |
| 363       | CFT073  | ins               | 4564756           | 1    | rRNA_020   | rrl  |
| 364       | CFT073  | ins               | 4634107           | 1    | intergenic |      |
| 365       | clone D | ins               | 4671388           | 1    | intergenic |      |
| 366       | clone D | ins               | 4680413           | 10   | intergenic |      |
| 367       | CFT073  | del               | 4790012           | 1    | i02_4776   | yjfL |
| 368       | CFT073  | del               | 4790954           | 1    | i02_4778   | yjfC |
| 369       | CFT073  | ins               | 4868672           | 1    | i02_4861   |      |
| 370       | CFT073  | ins               | 4988920           | 1    | i02_4950   |      |
| 371       | CFT073  | ins               | 4988958           | 1    | i02_4950   |      |
| 372       | clone D | del               | 5038168           | 1    | i02_5003   | lasT |

<sup>a</sup>, ins, insertion; del, deletion; indel: deletion or insertion.

<sup>b</sup>, Using the clone D\_i2 genome as reference. For indels the base indicated is the base before the insertion or deletion.
