# Supplementary material for: Rates of Mutation and Host Transmission for an Escherichia coli Clone over 3 Years
Source: PubMed Central journal article supplement (PMC3203180; doi:10.1371/journal.pone.0026907), 2011-10-27
Supplement: pone.0026907.s007.pdf [file pone.0026907.s007.pdf]

| Indel No. | Clone D <sup>a</sup> | CFT073 <sup>a</sup> | Lineage | type  | site <sup>b</sup> | size | Locus_tag  | Gene | Inferred<br>ancestral <sup>c</sup> | Support<br>level <sup>d</sup> | ED1a | 536 | S88 | APEC O1 | UT189 | E2348/69 | ATCC8739 | K-12 | HS | SMS3-5 | IAI39 | E24377A | SE11 | 55989 | IAI1 | Sakai | UMN026 | B4 Sb227 | F5 8401 | SS Ss046 | D1 Sd197 | B18 BS512 | F2a 2457T | F2a 301 |   |
|-----------|----------------------|---------------------|---------|-------|-------------------|------|------------|------|------------------------------------|-------------------------------|------|-----|-----|---------|-------|----------|----------|------|----|--------|-------|---------|------|-------|------|-------|--------|----------|---------|----------|----------|-----------|-----------|---------|---|
| 98        | -                    | +                   | ?       | indel | 347908            | 1    | i02_0343   |      | ?                                  | +/-                           | /    | /   | /   | /       | /     | /        | /        | /    | /  | /      | /     | /       | /    | /     | /    | /     | /      | /        | /       | /        | /        | /         | /         | /       |   |
| 99        | +                    | -                   | clone D | ins   | 376418            | 2    | i02_0372   |      | -                                  | +++                           | /    | -   | -   | -       | -     | /        | /        | /    | /  | /      | /     | /       | /    | /     | /    | /     | /      | /        | /       | /        | /        | /         | /         | /       |   |
| 100       | -                    | +                   | CFT073  | ins   | 390718            | 1    | intergenic |      | -                                  | ++++                          | -    | -   | -   | -       | -     | -        | -        | -    | -  | -      | -     | -       | -    | -     | -    | -     | -      | -        | /       | /        | /        | /         | /         | /       |   |
| 101       | -                    | +                   | CFT073  | ins   | 390903            | 1    | i02_0391   |      | -                                  | ++++                          | -    | -   | -   | -       | -     | -        | /        | /    | /  | -      | -     | /       | /    | /     | /    | -     | -      | /        | /       | /        | /        | /         | /         | /       |   |
| 102       | +                    | -                   | CFT073  | del   | 390967            | 1    | i02_0391   |      | +                                  | ++++                          | /    | +   | +   | +       | +     | +        | /        | /    | /  | +      | +     | /       | /    | /     | /    | +     | +      | /        | /       | /        | /        | /         | /         | /       |   |
| 103       | -                    | +                   | CFT073  | ins   | 390984            | 1    | i02_0391   |      | -                                  | ++++                          | /    | -   | -   | -       | -     | -        | /        | /    | /  | -      | -     | /       | /    | /     | /    | -     | -      | /        | /       | /        | /        | /         | /         | /       |   |
| 104       | +                    | -                   | CFT073  | del   | 391060            | 1    | i02_0391   |      | +                                  | ++++                          | /    | +   | +   | +       | +     | +        | /        | /    | /  | +      | +     | /       | /    | /     | /    | +     | +      | /        | /       | /        | /        | /         | /         | /       |   |
| 105       | -                    | +                   | CFT073  | ins   | 416956            | 1    | intergenic |      | -                                  | ++                            | /    | -   | +   | +       | +     | /        | /        | /    | /  | /      | /     | /       | /    | /     | /    | /     | /      | /        | /       | /        | /        | /         | /         | /       |   |
| 106       | -                    | +                   | CFT073  | ins   | 431814            | 1    | i02_0427   |      | -                                  | ++++                          | -    | -   | -   | -       | -     | -        | -        | -    | -  | -      | -     | -       | -    | -     | -    | -     | -      | /        | /       | -        | /        | /         | /         | /       |   |
| 107       | -                    | +                   | CFT073  | ins   | 431828            | 1    | i02_0427   |      | -                                  | ++++                          | -    | -   | -   | -       | -     | -        | -        | -    | -  | -      | -     | -       | -    | -     | -    | -     | -      | /        | /       | -        | /        | /         | /         | /       |   |
| 108       | -                    | +                   | CFT073  | ins   | 453588            | 1    | intergenic |      | -                                  | ++++                          | -    | -   | -   | +       | -     | -        | -        | -    | -  | -      | -     | -       | -    | -     | -    | -     | -      | /        | /       | -        | -        | /         | /         | /       |   |
| 109       | +                    | -                   | CFT073  | del   | 453852            | 1    | i02_0444   | lacI | +                                  | ++++                          | +    | +   | +   | +       | +     | +        | +        | +    | +  | +      | +     | +       | +    | +     | +    | +     | +      | /        | /       | +        | +        | /         | /         | /       |   |
| 110       | -                    | +                   | CFT073  | ins   | 453931            | 1    | i02_0444   | lacI | -                                  | ++++                          | -    | -   | -   | -       | -     | -        | -        | -    | -  | -      | -     | -       | -    | -     | -    | -     | -      | /        | /       | -        | -        | /         | /         | /       |   |
| 111       | -                    | +                   | CFT073  | ins   | 593588            | 1    | i02_0588   | ybbM | -                                  | ++++                          | -    | -   | -   | -       | -     | -        | -        | -    | -  | -      | -     | -       | -    | -     | -    | -     | -      | -        | -       | -        | -        | -         | -         | -       |   |
| 112       | -                    | +                   | CFT073  | ins   | 599774            | 1    | i02_0594   | ybbB | -                                  | ++++                          | -    | -   | -   | -       | -     | -        | -        | -    | -  | -      | /     | -       | -    | -     | -    | -     | -      | -        | -       | -        | -        | -         | -         | -       |   |
| 113       | -                    | +                   | CFT073  | ins   | 626234            | 1    | i02_0618   | ybcI | -                                  | ++++                          | -    | -   | -   | -       | -     | -        | -        | -    | -  | -      | -     | -       | -    | -     | -    | -     | -      | -        | -       | -        | -        | -         | -         | -       |   |
| 114       | +                    | -                   | CFT073  | del   | 793305            | 1    | i02_0779   |      | +                                  | +++                           | +    | +   | +   | +       | +     | /        | /        | /    | /  | /      | /     | /       | /    | /     | /    | /     | /      | /        | /       | /        | /        | /         | /         | /       | / |
| 115       | -                    | +                   | CFT073  | ins   | 793475            | 1    | i02_0780   |      | -                                  | +++                           | -    | -   | -   | -       | -     | /        | /        | /    | /  | /      | /     | /       | /    | /     | /    | /     | /      | /        | /       | /        | /        | /         | /         | /       | / |
| 116       | -                    | +                   | CFT073  | ins   | 802982            | 1    | i02_0791   | ybgF | -                                  | ++++                          | -    | -   | -   | -       | -     | -        | -        | -    | -  | -      | -     | -       | -    | -     | -    | -     | -      | -        | -       | -        | -        | -         | -         | -       |   |
| 117       | -                    | +                   | CFT073  | ins   | 942703            | 1    | i02_0931   |      | -                                  | ++++                          | -    | -   | -   | -       | -     | -        | -        | -    | -  | -      | -     | -       | -    | -     | -    | -     | -      | -        | -       | -        | -        | -         | -         | -       |   |
| 118       | -                    | +                   | CFT073  | ins   | 970076            | 1    | i02_0953   |      | -                                  | ++++                          | -    | -   | -   | -       | -     | -        | -        | -    | -  | -      | -     | -       | -    | -     | -    | -     | -      | -        | -       | -        | -        | -         | -         | -       |   |
| 119       | -                    | +                   | CFT073  | ins   | 986199            | 1    | i02_0965   | lpxK | -                                  | ++++                          | -    | -   | -   | -       | -     | -        | -        | -    | -  | -      | -     | -       | -    | -     | -    | -     | -      | -        | -       | -        | -        | -         | -         | -       |   |
| 120       | +                    | -                   | CFT073  | del   | 1066831           | 1    | i02_1039   | agp  | +                                  | ++++                          | +    | +   | +   | +       | +     | +        | +        | +    | +  | +      | +     | +       | +    | +     | +    | +     | +      | /        | +       | +        | +        | /         | +         | +       |   |
| 121       | -                    | +                   | CFT073  | ins   | 1066931           | 1    | i02_1039   | agp  | -                                  | ++++                          | -    | -   | -   | -       | -     | -        | -        | -    | -  | -      | -     | -       | -    | -     | -    | -     | -      | /        | -       | -        | -        | /         | -         | -       |   |
| 122       | -                    | +                   | CFT073  | ins   | 1081238           | 1    | i02_1055   |      | -                                  | ++++                          | -    | -   | -   | -       | -     | -        | -        | -    | -  | -      | -     | -       | -    | -     | -    | -     | -      | /        | -       | /        | /        | /         | /         | /       |   |





| Indel No. | Clone D <sup>a</sup> | CFT073 <sup>a</sup> | Lineage | type | site <sup>b</sup> | size | Locus_tag  | Gene | Inferred | ancestral <sup>c</sup> | Support level <sup>d</sup> | ED1a | 536 | S88 | APEC O1 | UT189 | E2348/69 | ATCC8739 | K-12 | HS | SMS3-5 | IAI39 | E24377A | SE11 | 55989 | IAI1 | Sakai | UMN026 | B4 Sb227 | F5 8401 | SS Ss046 | D1 Sd197 | B18 BS512 | F2a 2457T | F2a 301 |   |   |   |   |
|-----------|----------------------|---------------------|---------|------|-------------------|------|------------|------|----------|------------------------|----------------------------|------|-----|-----|---------|-------|----------|----------|------|----|--------|-------|---------|------|-------|------|-------|--------|----------|---------|----------|----------|-----------|-----------|---------|---|---|---|---|
| 173       | +                    | -                   | clone D | ins  | 2071197           | 6    | i02_2126   | yecG | -        | ++++                   | -                          | -    | -   | -   | -       | -     | -        | -        | /    | -  | -      | -     | -       | -    | -     | -    | -     | -      | -        | -       | -        | -        | /         | /         | /       |   |   |   |   |
| 174       | -                    | +                   | clone D | del  | 2148157           | 1    | intergenic |      | +        | +                      | /                          | +    | /   | /   | /       | +     | /        | /        | /    | /  | /      | /     | /       | /    | /     | /    | /     | /      | /        | /       | /        | /        | /         | /         | /       |   |   |   |   |
| 175       | +                    | -                   | CFT073  | del  | 2158529           | 1    | intergenic |      | +        | +                      | /                          | +    | /   | /   | +       | /     | /        | /        | /    | /  | /      | /     | /       | /    | /     | /    | /     | /      | /        | /       | /        | /        | /         | /         | /       |   |   |   |   |
| 176       | +                    | -                   | clone D | ins  | 2173925           | 9    | i02_2241   |      | -        | +++                    | -                          | -    | -   | -   | +       | /     | /        | /        | /    | /  | /      | -     | /       | /    | -     | /    | /     | -      | /        | /       | /        | /        | /         | /         | /       |   |   |   |   |
| 177       | -                    | +                   | CFT073  | ins  | 2177218           | 1    | i02_2242   |      | -        | ++++                   | -                          | -    | -   | -   | -       | /     | /        | /        | /    | /  | /      | -     | /       | /    | -     | /    | /     | -      | /        | /       | /        | /        | /         | /         | /       |   |   |   |   |
| 178       | +                    | -                   | CFT073  | del  | 2180042           | 1    | i02_2242   |      | +        | ++++                   | +                          | +    | +   | +   | +       | +     | /        | /        | /    | /  | /      | +     | /       | /    | +     | /    | /     | +      | /        | /       | /        | /        | /         | /         | /       |   |   |   |   |
| 179       | +                    | -                   | CFT073  | del  | 2180052           | 2    | i02_2242   |      | +        | ++++                   | +                          | +    | +   | +   | +       | +     | /        | /        | /    | /  | /      | +     | /       | /    | +     | /    | /     | +      | /        | /       | /        | /        | /         | /         | /       |   |   |   |   |
| 180       | +                    | -                   | CFT073  | del  | 2180060           | 2    | i02_2242   |      | +        | ++++                   | +                          | +    | +   | +   | +       | +     | /        | /        | /    | /  | /      | +     | /       | /    | +     | /    | /     | +      | /        | /       | /        | /        | /         | /         | /       |   |   |   |   |
| 181       | +                    | -                   | CFT073  | del  | 2187699           | 1    | i02_2246   |      | +        | ++++                   | +                          | +    | +   | +   | +       | +     | /        | /        | /    | /  | /      | +     | /       | /    | +     | /    | /     | +      | /        | /       | /        | /        | /         | /         | /       |   |   |   |   |
| 182       | -                    | +                   | clone D | del  | 2190262           | 1    | intergenic |      | +        | ++++                   | +                          | +    | +   | +   | +       | +     | /        | /        | /    | /  | /      | +     | /       | /    | +     | /    | /     | +      | /        | /       | /        | /        | /         | /         | /       |   |   |   |   |
| 183       | +                    | -                   | CFT073  | del  | 2194430           | 1    | i02_2251   |      | +        | ++++                   | +                          | +    | +   | +   | +       | +     | +        | +        | +    | +  | +      | +     | +       | +    | +     | +    | +     | +      | +        | /       | /        | +        | /         | /         | /       | / |   |   |   |
| 184       | +                    | -                   | CFT073  | del  | 2194446           | 1    | i02_2251   |      | +        | ++++                   | +                          | +    | +   | +   | +       | +     | +        | +        | +    | +  | +      | +     | +       | +    | +     | +    | +     | +      | +        | /       | /        | +        | /         | /         | /       | / |   |   |   |
| 185       | -                    | +                   | CFT073  | ins  | 2212027           | 1    | i02_2264   |      | -        | +                      | /                          | -    | /   | /   | -       | /     | /        | /        | /    | /  | /      | /     | /       | /    | /     | /    | /     | /      | /        | /       | /        | /        | /         | /         | /       | / |   |   |   |
| 186       | -                    | +                   | CFT073  | ins  | 2249329           | 1    | i02_2279   |      | -        | +                      | /                          | -    | /   | /   | -       | /     | /        | /        | /    | /  | /      | /     | /       | /    | /     | /    | /     | /      | /        | /       | /        | /        | /         | /         | /       | / |   |   |   |
| 187       | +                    | -                   | CFT073  | del  | 2255272           | 16   | intergenic |      | +        | +                      | /                          | +    | /   | /   | +       | /     | /        | /        | /    | /  | /      | /     | /       | /    | /     | /    | /     | /      | /        | /       | /        | /        | /         | /         | /       | / |   |   |   |
| 188       | -                    | +                   | CFT073  | ins  | 2272088           | 1    | intergenic |      | -        | +                      | /                          | -    | /   | /   | -       | /     | /        | /        | /    | /  | /      | /     | /       | /    | /     | /    | /     | /      | /        | /       | /        | /        | /         | /         | /       | / |   |   |   |
| 189       | -                    | +                   | CFT073  | ins  | 2272119           | 1    | intergenic |      | -        | +                      | /                          | -    | /   | /   | -       | /     | /        | /        | /    | /  | /      | /     | /       | /    | /     | /    | /     | /      | /        | /       | /        | /        | /         | /         | /       | / |   |   |   |
| 190       | -                    | +                   | CFT073  | ins  | 2272141           | 1    | intergenic |      | -        | +                      | /                          | -    | /   | /   | -       | /     | /        | /        | /    | /  | /      | /     | /       | /    | /     | /    | /     | /      | /        | /       | /        | /        | /         | /         | /       | / |   |   |   |
| 191       | -                    | +                   | CFT073  | ins  | 2281124           | 1    | intergenic |      | -        | ++++                   | -                          | -    | -   | -   | -       | -     | /        | /        | /    | /  | -      | /     | -       | /    | -     | /    | /     | -      | /        | /       | /        | /        | /         | /         | /       | / |   |   |   |
| 192       | -                    | +                   | clone D | del  | 2289140           | 1    | i02_2318   |      | +        | ++++                   | /                          | +    | +   | +   | +       | /     | /        | /        | /    | +  | +      | +     | /       | +    | /     | /    | /     | /      | /        | /       | /        | /        | /         | /         | /       | / |   |   |   |
| 193       | -                    | +                   | clone D | del  | 2297026           | 1    | intergenic |      | +        | +++                    | /                          | +    | +   | +   | +       | /     | /        | /        | /    | +  | +      | /     | /       | +    | /     | /    | /     | /      | /        | /       | /        | /        | /         | /         | /       | / |   |   |   |
| 194       | +                    | -                   | CFT073  | del  | 2362248           | 1    | i02_2386   |      | +        | ++++                   | +                          | +    | +   | +   | +       | +     | +        | +        | +    | /  | +      | +     | +       | +    | +     | +    | +     | +      | +        | +       | +        | +        | +         | +         | /       | + | + | + |   |
| 195       | +                    | -                   | CFT073  | del  | 2362290           | 1    | i02_2386   |      | +        | ++++                   | +                          | +    | +   | +   | +       | +     | +        | +        | +    | /  | +      | +     | +       | +    | +     | +    | +     | +      | +        | +       | +        | +        | +         | +         | +       | / | + | + | + |
| 196       | +                    | -                   | CFT073  | del  | 2362303           | 1    | i02_2386   |      | +        | ++++                   | +                          | +    | +   | +   | +       | +     | +        | +        | +    | /  | +      | +     | +       | +    | +     | +    | +     | +      | +        | +       | +        | +        | +         | +         | +       | / | + | + | + |
| 197       | +                    | -                   | CFT073  | del  | 2362896           | 1    | i02_2387   |      | +        | ++++                   | +                          | +    | +   | +   | +       | +     | +        | +        | +    | /  | +      | +     | +       | +    | +     | +    | +     | +      | +        | +       | +        | +        | +         | +         | /       | + | + | + |   |

| Indel No. | Clone D <sup>a</sup> | CFT073 <sup>a</sup> | Lineage | type  | site <sup>b</sup> | size | Locus_tag  | Gene | Inferred | ancestral <sup>c</sup> | Support level <sup>d</sup> | ED1a | 536 | S88 | APEC O1 | UT189 | E2348/69 | ATCC8739 | K-12 | HS | SMS3-5 | IAI39 | E24377A | SE11 | 55989 | IAI1 | Sakai | UMN026 | B4 Sb227 | F5 8401 | SS Ss046 | D1 Sd197 | B18 BS512 | F2a 2457T | F2a 301 |   |   |
|-----------|----------------------|---------------------|---------|-------|-------------------|------|------------|------|----------|------------------------|----------------------------|------|-----|-----|---------|-------|----------|----------|------|----|--------|-------|---------|------|-------|------|-------|--------|----------|---------|----------|----------|-----------|-----------|---------|---|---|
| 198       | -                    | +                   | CFT073  | ins   | 2485913           | 2    | i02_2500   | yeiN | -        | ++++                   | -                          | -    | -   | -   | -       | -     | -        | -        | -    | -  | -      | -     | -       | -    | /     | -    | -     | -      | -        | -       | -        | /        | -         | -         | -       |   |   |
| 199       | +                    | -                   | CFT073  | del   | 2658778           | 1    | i02_2665   | yfcJ | +        | ++++                   | +                          | +    | +   | +   | +       | +     | +        | +        | +    | +  | +      | +     | /       | +    | +     | +    | +     | +      | +        | +       | +        | +        | /         | +         | +       | + |   |
| 200       | +                    | -                   | CFT073  | del   | 2658814           | 1    | i02_2665   | yfcJ | +        | ++++                   | +                          | +    | +   | +   | +       | +     | +        | +        | +    | +  | +      | +     | /       | +    | +     | +    | +     | +      | +        | +       | +        | +        | /         | +         | +       | + |   |
| 201       | -                    | +                   | ?       | indel | 2686052           | 1    | i02_2693   |      | ?        | +/-                    | /                          | /    | /   | /   | /       | /     | /        | /        | /    | /  | -      | /     | /       | /    | /     | /    | /     | /      | /        | /       | /        | /        | /         | /         | /       |   |   |
| 202       | -                    | +                   | ?       | indel | 2686086           | 1    | i02_2693   |      | ?        | +/-                    | /                          | /    | /   | /   | /       | /     | /        | /        | /    | /  | -      | /     | /       | /    | /     | /    | /     | /      | /        | /       | /        | /        | /         | /         | /       |   |   |
| 203       | -                    | +                   | ?       | indel | 2686164           | 18   | i02_2693   |      | ?        | +/-                    | /                          | /    | /   | /   | /       | /     | /        | /        | /    | /  | +      | /     | /       | /    | /     | /    | /     | /      | /        | /       | /        | /        | /         | /         | /       |   |   |
| 204       | +                    | -                   | CFT073  | del   | 2718016           | 1    | i02_2714   |      | +        | ++++                   | +                          | +    | +   | +   | +       | +     | +        | +        | +    | +  | +      | +     | +       | +    | +     | +    | +     | +      | +        | +       | +        | +        | +         | +         | +       | + |   |
| 205       | +                    | -                   | CFT073  | del   | 2751344           | 1    | i02_2746   | cysK | +        | ++++                   | +                          | +    | +   | +   | +       | +     | +        | +        | +    | +  | +      | +     | +       | +    | +     | +    | +     | +      | +        | +       | +        | +        | +         | +         | +       | + |   |
| 206       | -                    | +                   | CFT073  | ins   | 2751413           | 1    | intergenic |      | -        | ++++                   | -                          | -    | -   | -   | -       | -     | -        | -        | -    | -  | -      | -     | -       | -    | -     | -    | -     | -      | -        | -       | -        | -        | -         | -         | -       | - |   |
| 207       | -                    | +                   | CFT073  | ins   | 2751487           | 1    | intergenic |      | -        | ++++                   | -                          | -    | -   | -   | -       | -     | -        | -        | -    | -  | -      | -     | -       | -    | -     | -    | -     | -      | -        | -       | -        | -        | -         | -         | -       | - |   |
| 208       | -                    | +                   | CFT073  | ins   | 2752054           | 1    | i02_2749   | ptsl | -        | ++++                   | -                          | -    | -   | -   | -       | -     | -        | -        | -    | -  | -      | -     | -       | -    | -     | -    | -     | -      | -        | -       | -        | -        | -         | -         | -       | - |   |
| 209       | +                    | -                   | clone D | ins   | 2852951           | 9    | i02_2837   | pbpC | -        | ++++                   | -                          | -    | -   | -   | -       | -     | -        | -        | -    | -  | -      | -     | -       | -    | -     | -    | -     | -      | /        | /       | -        | /        | /         | /         | /       |   |   |
| 210       | -                    | +                   | CFT073  | ins   | 2885705           | 1    | i02_2869   |      | -        | ++++                   | -                          | -    | -   | -   | -       | -     | -        | -        | -    | -  | -      | -     | -       | -    | -     | -    | -     | -      | -        | -       | -        | -        | -         | -         | -       | - |   |
| 211       | -                    | +                   | CFT073  | ins   | 2917217           | 1    | intergenic |      | -        | ++++                   | -                          | -    | -   | -   | -       | -     | -        | -        | -    | -  | -      | -     | -       | -    | -     | -    | -     | -      | -        | -       | -        | -        | -         | -         | -       | - |   |
| 212       | -                    | +                   | CFT073  | ins   | 2926828           | 1    | rRNA_005   | rnl  | -        | ++++                   | -                          | -    | -   | -   | -       | -     | -        | -        | -    | -  | -      | -     | -       | -    | -     | -    | -     | -      | -        | -       | -        | -        | -         | -         | -       | - | - |
| 213       | +                    | -                   | CFT073  | del   | 2927085           | 1    | rRNA_005   | rnl  | +        | ++                     | +                          | +    | +   | +   | +       | +     | +        | +        | -    | -  | +      | +     | -       | -    | -     | -    | -     | +      | -        | -       | -        | -        | -         | -         | -       | - | - |
| 214       | +                    | -                   | CFT073  | del   | 2927088           | 1    | rRNA_005   | rnl  | +        | ++                     | +                          | +    | +   | +   | +       | +     | +        | +        | -    | -  | +      | +     | -       | -    | -     | -    | -     | +      | -        | -       | -        | -        | -         | -         | -       | - | - |
| 215       | +                    | -                   | CFT073  | del   | 2927224           | 13   | rRNA_005   | rnl  | +        | ++                     | +                          | +    | +   | +   | +       | +     | +        | -        | -    | -  | +      | -     | -       | -    | -     | -    | -     | +      | -        | +       | -        | -        | -         | -         | -       | + | + |
| 216       | -                    | +                   | clone D | del   | 2927237           | 13   | rRNA_005   | rnl  | +        | ++++                   | +                          | +    | +   | +   | +       | +     | +        | +        | +    | +  | +      | +     | +       | +    | +     | +    | +     | +      | +        | +       | +        | +        | +         | +         | +       | + | + |
| 217       | -                    | +                   | CFT073  | ins   | 2927786           | 1    | rRNA_005   | rnl  | -        | ++                     | -                          | +    | -   | -   | -       | -     | -        | +        | +    | +  | -      | -     | +       | -    | +     | +    | +     | -      | +        | +       | +        | +        | -         | -         | +       | + |   |
| 218       | -                    | +                   | CFT073  | ins   | 2928406           | 3    | rRNA_005   | rnl  | -        | ++                     | -                          | +    | -   | +   | -       | -     | +        | +        | +    | +  | +      | -     | +       | +    | +     | +    | -     | -      | +        | +       | +        | +        | -         | +         | +       | + |   |
| 219       | +                    | -                   | CFT073  | del   | 2928408           | 3    | rRNA_005   | rnl  | +        | ++                     | +                          | +    | +   | +   | +       | +     | +        | /        | -    | -  | +      | +     | -       | -    | -     | -    | -     | +      | -        | -       | -        | +        | -         | -         | -       | - | - |
| 220       | -                    | +                   | CFT073  | ins   | 2928417           | 1    | rRNA_005   | rnl  | -        | ++                     | -                          | +    | -   | +   | -       | -     | +        | +        | +    | +  | +      | -     | +       | +    | +     | +    | -     | -      | +        | +       | +        | +        | -         | +         | +       | + |   |
| 221       | -                    | +                   | clone D | del   | 2928977           | 2    | intergenic |      | +        | ++++                   | /                          | /    | +   | +   | +       | +     | /        | /        | +    | +  | +      | +     | +       | +    | +     | /    | /     | /      | +        | /       | /        | /        | +         | /         | /       | / |   |
| 222       | +                    | -                   | CFT073  | del   | 2928978           | 16   | intergenic |      | +        | ++                     | +                          | +    | +   | +   | +       | +     | +        | +        | +    | -  | -      | +     | -       | -    | -     | +    | +     | -      | -        | +       | +        | +        | -         | +         | +       | + |   |

| Indel No. | Clone D <sup>a</sup> | CFT073 <sup>a</sup> | Lineage | type  | site <sup>b</sup> | size | Locus_tag  | Gene | Inferred | ancestral <sup>c</sup> | Support level <sup>d</sup> | ED1a | 536 | S88 | APEC O1 | UT189 | E2348/69 | ATCC8739 | K-12 | HS | SMS3-5 | IAI39 | E24377A | SE11 | 55989 | IAI1 | Sakai | UMN026 | B4 Sb227 | F5 8401 | SS Ss046 | D1 Sd197 | B18 BS512 | F2a 2457T | F2a 301 |   |
|-----------|----------------------|---------------------|---------|-------|-------------------|------|------------|------|----------|------------------------|----------------------------|------|-----|-----|---------|-------|----------|----------|------|----|--------|-------|---------|------|-------|------|-------|--------|----------|---------|----------|----------|-----------|-----------|---------|---|
| 223       | -                    | +                   | clone D | del   | 2928978           | 5    | intergenic |      | +        | ++++                   | /                          | /    | +   | +   | +       | /     | /        | +        | +    | +  | +      | +     | +       | /    | /     | /    | +     | /      | /        | /       | +        | /        | /         | /         |         |   |
| 224       | +                    | -                   | CFT073  | del   | 2929090           | 13   | intergenic |      | +        | ++                     | +                          | +    | +   | -   | +       | +     | -        | -        | +    | +  | +      | +     | -       | -    | +     | +    | -     | +      | +        | +       | +        | +        | +         | +         |         |   |
| 225       | -                    | +                   | ?       | indel | 2929104           | 13   | intergenic |      | ?        | +/-                    | /                          | /    | /   | /   | /       | /     | /        | +        | /    | /  | -      | +     | +       | /    | /     | /    | /     | /      | /        | /       | /        | /        | /         | /         |         |   |
| 226       | +                    | -                   | CFT073  | del   | 2929226           | 20   | intergenic |      | +        | ++                     | +                          | +    | +   | -   | +       | +     | -        | -        | -    | +  | +      | +     | -       | -    | -     | -    | +     | +      | +        | +       | +        | +        | -         | +         | +       |   |
| 227       | +                    | -                   | CFT073  | del   | 2929450           | 1    | rRNA_006   | rrs  | +        | ++++                   | +                          | +    | +   | +   | +       | +     | +        | +        | +    | +  | +      | +     | +       | +    | +     | +    | +     | +      | +        | +       | +        | +        | +         | +         | +       |   |
| 228       | +                    | -                   | CFT073  | del   | 2929550           | 1    | rRNA_006   | rrs  | +        | ++++                   | +                          | +    | +   | +   | +       | +     | +        | +        | +    | +  | +      | +     | +       | +    | +     | +    | +     | +      | +        | +       | +        | +        | +         | +         | +       | + |
| 229       | -                    | +                   | CFT073  | ins   | 2930036           | 1    | rRNA_006   | rrs  | -        | ++++                   | -                          | -    | -   | +   | -       | -     | -        | -        | -    | -  | -      | -     | -       | -    | -     | -    | -     | -      | -        | -       | -        | -        | -         | -         | -       |   |
| 230       | -                    | +                   | CFT073  | ins   | 2930063           | 1    | rRNA_006   | rrs  | -        | ++++                   | -                          | -    | -   | +   | -       | -     | -        | -        | -    | -  | -      | -     | -       | -    | -     | -    | -     | -      | -        | -       | -        | -        | -         | -         | -       |   |
| 231       | -                    | +                   | CFT073  | ins   | 2930079           | 1    | rRNA_006   | rrs  | -        | ++++                   | -                          | -    | -   | +   | -       | -     | -        | -        | -    | -  | -      | -     | -       | -    | -     | -    | -     | -      | -        | -       | -        | -        | -         | -         | -       |   |
| 232       | -                    | +                   | CFT073  | ins   | 2930102           | 1    | rRNA_006   | rrs  | -        | ++++                   | -                          | -    | -   | +   | -       | -     | -        | -        | -    | -  | -      | -     | -       | -    | -     | -    | -     | -      | -        | -       | -        | -        | -         | -         | -       |   |
| 233       | -                    | +                   | CFT073  | ins   | 2930210           | 1    | rRNA_006   | rrs  | -        | ++++                   | -                          | -    | -   | +   | -       | -     | -        | -        | -    | -  | -      | -     | -       | -    | -     | -    | -     | -      | -        | -       | -        | -        | -         | -         | -       |   |
| 234       | -                    | +                   | CFT073  | ins   | 2930267           | 1    | rRNA_006   | rrs  | -        | ++++                   | -                          | -    | -   | +   | -       | -     | -        | -        | -    | -  | -      | -     | -       | -    | -     | -    | -     | -      | -        | -       | -        | -        | -         | -         | -       |   |
| 235       | -                    | +                   | CFT073  | ins   | 2930289           | 1    | rRNA_006   | rrs  | -        | ++++                   | -                          | -    | -   | +   | -       | -     | -        | -        | -    | -  | -      | -     | -       | -    | -     | -    | -     | -      | -        | -       | -        | -        | -         | -         | -       |   |
| 236       | -                    | +                   | CFT073  | ins   | 2930305           | 1    | rRNA_006   | rrs  | -        | ++++                   | -                          | -    | -   | +   | -       | -     | -        | -        | -    | -  | -      | -     | -       | -    | -     | -    | -     | -      | -        | -       | -        | -        | -         | -         | -       |   |
| 237       | -                    | +                   | CFT073  | ins   | 2930427           | 1    | rRNA_006   | rrs  | -        | ++++                   | -                          | -    | -   | +   | -       | -     | -        | -        | -    | -  | -      | -     | -       | -    | -     | -    | -     | -      | -        | -       | -        | -        | -         | -         | -       |   |
| 238       | -                    | +                   | CFT073  | ins   | 2930474           | 1    | rRNA_006   | rrs  | -        | ++++                   | -                          | -    | -   | +   | -       | -     | -        | -        | -    | -  | -      | -     | -       | -    | -     | -    | -     | -      | -        | -       | -        | -        | -         | -         | -       |   |
| 239       | -                    | +                   | CFT073  | ins   | 2930497           | 1    | rRNA_006   | rrs  | -        | ++++                   | -                          | -    | -   | +   | -       | -     | -        | -        | -    | -  | -      | -     | -       | -    | -     | -    | -     | -      | -        | -       | -        | -        | -         | -         | -       |   |
| 240       | +                    | -                   | CFT073  | del   | 2969602           | 1    | i02_2955   |      | +        | ++++                   | +                          | +    | +   | +   | +       | +     | /        | /        | /    | +  | +      | /     | /       | /    | /     | +    | +     | /      | /        | /       | +        | /        | /         | /         |         |   |
| 241       | +                    | -                   | CFT073  | del   | 2969636           | 1    | intergenic |      | +        | ++++                   | +                          | +    | +   | +   | +       | +     | /        | /        | /    | /  | +      | +     | /       | /    | /     | /    | +     | -      | /        | /       | /        | +        | /         | /         | /       |   |
| 242       | -                    | +                   | CFT073  | ins   | 2978621           | 1    | intergenic |      | -        | ++++                   | -                          | -    | -   | -   | -       | -     | -        | -        | -    | -  | -      | -     | -       | -    | -     | -    | -     | -      | -        | -       | -        | -        | -         | -         | -       |   |
| 243       | -                    | +                   | CFT073  | ins   | 2992303           | 1    | i02_2981   | alaS | -        | ++++                   | -                          | -    | -   | -   | -       | -     | -        | -        | -    | -  | -      | -     | -       | -    | -     | -    | -     | -      | -        | -       | -        | -        | -         | -         | -       |   |
| 244       | -                    | +                   | CFT073  | ins   | 3004393           | 1    | i02_2995   | norV | -        | ++++                   | -                          | -    | -   | -   | -       | -     | -        | -        | -    | -  | -      | -     | -       | -    | -     | -    | /     | -      | -        | -       | -        | -        | -         | -         | -       |   |
| 245       | -                    | +                   | CFT073  | ins   | 3038925           | 5    | i02_3034   |      | -        | ++++                   | -                          | -    | -   | -   | -       | -     | -        | -        | -    | -  | -      | -     | -       | -    | -     | -    | -     | -      | -        | -       | -        | -        | -         | -         | -       |   |
| 246       | -                    | +                   | CFT073  | ins   | 3045109           | 2    | intergenic |      | -        | ++++                   | -                          | -    | -   | -   | -       | -     | -        | -        | -    | -  | -      | -     | -       | -    | -     | -    | -     | -      | -        | -       | -        | -        | -         | -         | -       |   |
| 247       | -                    | +                   | clone D | del   | 3068496           | 15   | i02_3065   |      | +        | ++++                   | +                          | +    | +   | +   | +       | +     | /        | /        | /    | /  | +      | /     | /       | /    | /     | /    | +     | +      | /        | /       | /        | +        | /         | /         | /       |   |













| Indel No. | Clone D <sup>a</sup> | CFT073 <sup>a</sup> | Lineage | type | site <sup>b</sup> | size | Locus_tag | Gene | Inferred<br>ancestral <sup>c</sup><br>Support<br>level <sup>d</sup> | ED1a | 536 | S88 | APEC O1 | UT189 | E2348/69 | ATCC8739 | K-12 | HS | SMS3-5 | IAI39 | E24377A | SE11 | 55989 | IAI1 | Sakai | UMN026 | B4 Sb227 | F5 8401 | SS Ss046 | D1 Sd197 | B18 BS512 | F2a 2457T | F2a 301 |
|-----------|----------------------|---------------------|---------|------|-------------------|------|-----------|------|---------------------------------------------------------------------|------|-----|-----|---------|-------|----------|----------|------|----|--------|-------|---------|------|-------|------|-------|--------|----------|---------|----------|----------|-----------|-----------|---------|
|-----------|----------------------|---------------------|---------|------|-------------------|------|-----------|------|---------------------------------------------------------------------|------|-----|-----|---------|-------|----------|----------|------|----|--------|-------|---------|------|-------|------|-------|--------|----------|---------|----------|----------|-----------|-----------|---------|

<sup>a</sup> "+" indicates the block present, "-" indicates the block absent, "/" indicates the block and nearby sequence absent.

<sup>b</sup> Using the clone D\_i2 genome as reference. For indels the base indicated is the base before the insertion or deletion.

<sup>c</sup> Presence or absence of indel block in clone D/CFT073 ancestor as inferred from outgroup analysis.

<sup>d</sup> Level of support for allocation of indel blocks as given in previous column.

"++++" agreement is high-8 or more outgroup strains with expected type and at most 2 with the opposite, and ED1a agrees or site not present

"+++ " agreement good-4 or more outgroup strains with expected type and at most 2 with the opposite, and ED1a agrees or site not present

"++ " agreement in ED1a regardless of situation with other outgroup strains

"+" no conflict but very limited support as either the block and nearby sequence absent in ED1a, and/or outgroup support less than given above

"+/-" no conflict but no support (the block and its nearby sequence not present in any outgroup OR both alternative lineages supported equally).
