# Supplementary material for: Rates of Mutation and Host Transmission for an Escherichia coli Clone over 3 Years
Source: PubMed Central journal article supplement (PMC3203180; doi:10.1371/journal.pone.0026907), 2011-10-27
Supplement: pone.0026907.s008.pdf [file pone.0026907.s008.pdf]

**Table S7** SNPs between clone D and CFT073 genomes. A full list of single base differences between clone D and CFT073 genomes, including location, nature of difference, and name of gene affected.

| Lineage | Clone D site | CFT 073 site | mutation type <sup>a</sup> | recomb | Gene       | Gene name | Type |
|---------|--------------|--------------|----------------------------|--------|------------|-----------|------|
| clone D | 7482         | 8194         | s                          | out    | i02_0007   | yaaJ      | CDS  |
| CFT073  | 37232        | 37944        | s                          | out    | i02_0037   | caiE      | CDS  |
| clone D | 68282        | 69705        | ns                         | out    | i02_0064   | araA      | CDS  |
| clone D | 141616       | 145065       | ns                         | out    | i02_0135   | yacL      | CDS  |
| CFT073  | 142637       | 146086       | s                          | out    | i02_0137   | speE      | CDS  |
| CFT073  | 148054       | 151497       | nc                         | out    |            |           |      |
| clone D | 165170       | 168602       | s                          | out    | i02_0161   | pcnB      | CDS  |
| clone D | 166117       | 169549       | ns                         | out    | i02_0161   | pcnB      | CDS  |
| clone D | 175531       | 178963       | ns                         | out    | i02_0170   | fhuA      | CDS  |
| CFT073  | 220289       | 224434       | ns                         | out    | i02_0211   | yaeQ      | CDS  |
| CFT073  | 224221       | 228366       | ns                         | out    | i02_0216   | yaeF      | CDS  |
| clone D | 229285       | 233427       | ns                         | rec    | i02_0222   | metN      | CDS  |
| clone D | 230078       | 234220       | nc                         | rec    | intergenic |           |      |
| CFT073  | 230842       | 234984       | ns                         | rec    | i02_0224   | /         | CDS  |
| clone D | 230892       | 235034       | s                          | rec    | i02_0224   | /         | CDS  |
| clone D | 231008       | 235150       | nc                         | rec    | intergenic |           |      |
| CFT073  | 231133       | 235275       | nc                         | rec    | 16s rRNA   | rrs       | rRNA |
| clone D | 231226       | 235368       | nc                         | rec    | 16s rRNA   | rrs       | rRNA |
| CFT073  | 232045       | 236187       | nc                         | rec    | 16s rRNA   | rrs       | rRNA |
| CFT073  | 232049       | 236191       | nc                         | rec    | 16s rRNA   | rrs       | rRNA |
| CFT073  | 232053       | 236195       | nc                         | rec    | 16s rRNA   | rrs       | rRNA |
| CFT073  | 232065       | 236206       | nc                         | rec    | 16s rRNA   | rrs       | rRNA |
| CFT073  | 232081       | 236223       | nc                         | rec    | 16s rRNA   | rrs       | rRNA |
| clone D | 232521       | 236911       | nc                         | rec    | intergenic |           |      |
| CFT073  | 232747       | 236988       | nc                         | rec    | intergenic |           |      |
| clone D | 232846       | 237087       | nc                         | rec    | intergenic |           |      |
| clone D | 232849       | 237090       | nc                         | rec    | intergenic |           |      |
| CFT073  | 232891       | 237132       | nc                         | rec    | intergenic |           |      |
| CFT073  | 233001       | 237242       | nc                         | rec    | 23s rRNA   | rrl       | rRNA |
| clone D | 233234       | 237475       | nc                         | rec    | 23s rRNA   | rrl       | rRNA |
| CFT073  | 233274       | 237515       | nc                         | rec    | 23s rRNA   | rrl       | rRNA |
| clone D | 233275       | 237516       | nc                         | rec    | 23s rRNA   | rrl       | rRNA |
| CFT073  | 233459       | 237700       | nc                         | rec    | 23s rRNA   | rrl       | rRNA |
| CFT073  | 233763       | 238005       | nc                         | rec    | 23s rRNA   | rrl       | rRNA |
| CFT073  | 234088       | 238330       | nc                         | rec    | 23s rRNA   | rrl       | rRNA |
| CFT073  | 234094       | 238337       | nc                         | rec    | 23s rRNA   | rrl       | rRNA |
| CFT073  | 234135       | 238378       | nc                         | rec    | 23s rRNA   | rrl       | rRNA |
| CFT073  | 234136       | 238379       | nc                         | rec    | 23s rRNA   | rrl       | rRNA |
| CFT073  | 234145       | 238388       | nc                         | rec    | 23s rRNA   | rrl       | rRNA |
| CFT073  | 234146       | 238389       | nc                         | rec    | 23s rRNA   | rrl       | rRNA |
| CFT073  | 234422       | 238665       | nc                         | rec    | 23s rRNA   | rrl       | rRNA |
| CFT073  | 234464       | 238707       | nc                         | rec    | 23s rRNA   | rrl       | rRNA |
| clone D | 234523       | 238766       | nc                         | rec    | 23s rRNA   | rrl       | rRNA |
| clone D | 234787       | 239029       | nc                         | rec    | 23s rRNA   | rrl       | rRNA |
| CFT073  | 235123       | 239364       | nc                         | rec    | 23s rRNA   | rrl       | rRNA |

| Lineage | Clone D site | CFT 073 site | mutation type <sup>a</sup> | recomb | Gene       | Gene name | Type |
|---------|--------------|--------------|----------------------------|--------|------------|-----------|------|
| CFT073  | 235720       | 239961       | nc                         | rec    | 23s rRNA   | rrl       | rRNA |
| clone D | 235919       | 240160       | nc                         | rec    | intergenic |           |      |
| CFT073  | 241720       | 245961       | ns                         | out    | i02_0231   | gloB      | CDS  |
| CFT073  | 262792       | 258602       | ns                         | rec    | i02_0266   | /         | CDS  |
| clone D | 262803       | 258613       | ns                         | rec    | i02_0267   | /         | CDS  |
| CFT073  | 262805       | 258615       | ns                         | rec    | i02_0267   | /         | CDS  |
| clone D | 262806       | 258616       | ns                         | rec    | i02_0267   | /         | CDS  |
| CFT073  | 262807       | 258617       | ns                         | rec    | i02_0267   | /         | CDS  |
| CFT073  | 262828       | 258638       | s                          | rec    | i02_0267   | /         | CDS  |
| CFT073  | 262832       | 258642       | ns                         | rec    | i02_0267   | /         | CDS  |
| CFT073  | 262834       | 258644       | s                          | rec    | i02_0267   | /         | CDS  |
| CFT073  | 262841       | 258651       | ns                         | rec    | i02_0267   | /         | CDS  |
| CFT073  | 262843       | 258653       | ns                         | rec    | i02_0267   | /         | CDS  |
| CFT073  | 262845       | 258655       | ns                         | rec    | i02_0267   | /         | CDS  |
| CFT073  | 262855       | 258665       | s                          | rec    | i02_0267   | /         | CDS  |
| ?       | 262897       | 258707       | s                          | rec    | i02_0267   | /         | CDS  |
| CFT073  | 262900       | 258710       | s                          | rec    | i02_0267   | /         | CDS  |
| clone D | 262908       | 258718       | s                          | rec    | i02_0267   | /         | CDS  |
| CFT073  | 264168       | 259978       | s                          | rec    | i02_0268   | yeeS      | CDS  |
| clone D | 264177       | 259987       | ns                         | rec    | i02_0268   | yeeS      | CDS  |
| clone D | 264179       | 259989       | ns                         | rec    | i02_0268   | yeeS      | CDS  |
| clone D | 264182       | 259992       | ns                         | rec    | i02_0268   | yeeS      | CDS  |
| clone D | 264183       | 259993       | s                          | rec    | i02_0268   | yeeS      | CDS  |
| clone D | 264209       | 260019       | ns                         | rec    | i02_0268   | yeeS      | CDS  |
| clone D | 264213       | 260023       | s                          | rec    | i02_0268   | yeeS      | CDS  |
| clone D | 264222       | 260032       | nc                         | rec    | intergenic |           |      |
| clone D | 264229       | 260039       | nc                         | rec    | intergenic |           |      |
| clone D | 264232       | 260042       | nc                         | rec    | intergenic |           |      |
| clone D | 264240       | 260050       | s                          | rec    | i02_0269   | /         | CDS  |
| clone D | 264243       | 260053       | s                          | rec    | i02_0269   | /         | CDS  |
| CFT073  | 264415       | 260225       | ns                         | rec    | i02_0269   | /         | CDS  |
| CFT073  | 264417       | 260227       | s                          | rec    | i02_0269   | /         | CDS  |
| CFT073  | 264420       | 260230       | s                          | rec    | i02_0269   | /         | CDS  |
| CFT073  | 264426       | 260236       | s                          | rec    | i02_0269   | /         | CDS  |
| CFT073  | 264459       | 260269       | s                          | rec    | i02_0269   | /         | CDS  |
| CFT073  | 264462       | 260272       | s                          | rec    | i02_0269   | /         | CDS  |
| CFT073  | 264474       | 260284       | s                          | rec    | i02_0269   | /         | CDS  |
| CFT073  | 264477       | 260287       | s                          | rec    | i02_0269   | /         | CDS  |
| CFT073  | 264521       | 260331       | ns                         | rec    | i02_0269   | /         | CDS  |
| CFT073  | 264525       | 260335       | ns                         | rec    | i02_0269   | /         | CDS  |
| clone D | 264526       | 260336       | ns                         | rec    | i02_0269   | /         | CDS  |
| clone D | 264552       | 260362       | s                          | rec    | i02_0269   | /         | CDS  |
| CFT073  | 278428       | 274240       | s                          | out    | i02_0286   | /         | CDS  |
| CFT073  | 281024       | 276836       | s                          | out    | i02_0287   | /         | CDS  |
| CFT073  | 292352       | 288164       | ns                         | out    | i02_0303   | /         | CDS  |
| clone D | 310680       | 306465       | s                          | out    | i02_0322   | ulaA      | CDS  |
| ?       | 326514       | 322299       | nc                         | rec    | intergenic |           |      |
| ?       | 326758       | 322543       | nc                         | rec    | intergenic |           |      |
| ?       | 327001       | 322786       | nc                         | rec    | intergenic |           |      |
| ?       | 327109       | 322894       | nc                         | rec    | intergenic |           |      |
| ?       | 327152       | 322937       | nc                         | rec    | intergenic |           |      |

| Lineage | Clone D site | CFT 073 site | mutation type <sup>a</sup> | recomb | Gene       | Gene name | Type |
|---------|--------------|--------------|----------------------------|--------|------------|-----------|------|
| ?       | 327153       | 322938       | nc                         | rec    | intergenic |           |      |
| ?       | 327245       | 323031       | nc                         | rec    | intergenic |           |      |
| ?       | 327378       | 323164       | nc                         | rec    | intergenic |           |      |
| CFT073  | 364934       | 363040       | ns                         | out    | i02_0362   | pepD      | CDS  |
| CFT073  | 364961       | 363067       | ns                         | out    | i02_0362   | pepD      | CDS  |
| clone D | 370492       | 368598       | s                          | out    | i02_0368   | proB      | CDS  |
| clone D | 371371       | 369477       | s                          | out    | i02_0369   | proA      | CDS  |
| clone D | 385561       | 383665       | ns                         | out    | i02_0383   | yagX      | CDS  |
| CFT073  | 387348       | 385452       | ns                         | out    | i02_0385   | matB      | CDS  |
| clone D | 388324       | 386428       | ns                         | out    | i02_0386   | matA      | CDS  |
| CFT073  | 389023       | 387127       | ns                         | out    | i02_0387   | /         | CDS  |
| CFT073  | 390877       | 388982       | ns                         | rec    | i02_0391   | /         | CDS  |
| CFT073  | 390890       | 388995       | ns                         | rec    | i02_0391   | /         | CDS  |
| CFT073  | 390901       | 389006       | s                          | rec    | i02_0391   | /         | CDS  |
| clone D | 390930       | 389036       | s                          | rec    | i02_0391   | /         | CDS  |
| CFT073  | 390959       | 389066       | s                          | rec    | i02_0391   | /         | CDS  |
| CFT073  | 390983       | 389089       | ns                         | rec    | i02_0391   | /         | CDS  |
| ?       | 391040       | 389147       | s                          | rec    | i02_0391   | /         | CDS  |
| clone D | 391041       | 389148       | s                          | rec    | i02_0391   | /         | CDS  |
| clone D | 391059       | 389167       | ns                         | rec    | i02_0391   | /         | CDS  |
| CFT073  | 403397       | 401504       | ns                         | out    | i02_0399   | /         | CDS  |
| CFT073  | 418710       | 417089       | s                          | out    | i02_0416   | betA      | CDS  |
| CFT073  | 423896       | 422275       | nc                         | out    | intergenic |           |      |
| CFT073  | 437807       | 436282       | s                          | out    | i02_0433   | yahO      | CDS  |
| CFT073  | 450348       | 448823       | ns                         | out    | i02_0442   | lacY      | CDS  |
| CFT073  | 457462       | 455938       | s                          | out    | i02_0447   | adhC      | CDS  |
| CFT073  | 457464       | 455940       | ns                         | out    | i02_0447   | adhC      | CDS  |
| clone D | 462126       | 460602       | ns                         | out    | i02_0454   | tauA      | CDS  |
| CFT073  | 464761       | 463237       | ns                         | out    | i02_0458   | tauD      | CDS  |
| CFT073  | 469174       | 467650       | ns                         | out    | i02_0460   | /         | CDS  |
| clone D | 483921       | 482397       | ns                         | out    | i02_0481   | yaiE      | CDS  |
| clone D | 488150       | 486626       | s                          | out    | i02_0486   | araJ      | CDS  |
| CFT073  | 492766       | 491242       | ns                         | out    | i02_0490   | phoB      | CDS  |
| CFT073  | 494798       | 493274       | nc                         | out    | intergenic |           |      |
| clone D | 526368       | 524844       | ns                         | out    | i02_0524   | cyoA      | CDS  |
| clone D | 530872       | 529348       | ns                         | out    | i02_0530   | tig       | CDS  |
| clone D | 532814       | 531290       | nc                         | out    | intergenic |           |      |
| clone D | 535100       | 533576       | s                          | out    | i02_0533   | lon       | CDS  |
| clone D | 535138       | 533614       | ns                         | out    | i02_0533   | lon       | CDS  |
| clone D | 552216       | 551403       | ns                         | out    | i02_0551   | ybaA      | CDS  |
| CFT073  | 558643       | 557830       | s                          | out    | i02_0557   | acrB      | CDS  |
| CFT073  | 562872       | 562059       | ns                         | out    | i02_0560   | aefA      | CDS  |
| clone D | 571721       | 570908       | ns                         | out    | i02_0568   | htpG      | CDS  |
| clone D | 580712       | 579899       | ns                         | out    | i02_0575   | ushA      | CDS  |
| clone D | 586799       | 585986       | ns                         | out    | i02_0580   | copA      | CDS  |
| clone D | 614703       | 613892       | ns                         | out    | i02_0606   | ylbB      | CDS  |
| CFT073  | 629849       | 629039       | nc                         | out    | intergenic |           |      |
| CFT073  | 629856       | 629046       | nc                         | out    | intergenic |           |      |
| clone D | 662386       | 661576       | ns                         | out    | i02_0648   | fepE      | CDS  |
| CFT073  | 664386       | 663576       | s                          | out    | i02_0651   | fepD      | CDS  |
| CFT073  | 680371       | 679561       | ns                         | out    | i02_0665   | ybdO      | CDS  |

| Lineage | Clone D site | CFT 073 site | mutation type <sup>a</sup> | recomb | Gene       | Gene name | Type       |
|---------|--------------|--------------|----------------------------|--------|------------|-----------|------------|
| CFT073  | 683562       | 682752       | ns                         | out    | i02_0668   | ahpF      | CDS        |
| CFT073  | 693054       | 692244       | ns                         | rec    | i02_0677   | citC      | CDS        |
| CFT073  | 693092       | 692282       | ns                         | rec    | i02_0677   | citC      | CDS        |
| CFT073  | 693107       | 692297       | ns                         | rec    | i02_0677   | citC      | CDS        |
| CFT073  | 693108       | 692298       | ns                         | rec    | i02_0677   | citC      | CDS        |
| CFT073  | 693114       | 692304       | s                          | rec    | i02_0677   | citC      | CDS        |
| clone D | 695486       | 694676       | s                          | out    | i02_0679   | dpiA      | CDS        |
| clone D | 697657       | 696847       | nc                         | out    | intergenic |           |            |
| CFT073  | 701919       | 701109       | ns                         | out    | i02_0687   | /         | CDS        |
| CFT073  | 722795       | 721985       | ns                         | rec    | i02_0710   | /         | CDS        |
| CFT073  | 722796       | 721986       | ns                         | rec    | i02_0710   | /         | CDS        |
| CFT073  | 722797       | 721987       | ns                         | rec    | i02_0710   | /         | CDS        |
| CFT073  | 722804       | 721994       | ns                         | rec    | i02_0710   | /         | CDS        |
| clone D | 732505       | 731695       | ns                         | out    | i02_0718   | asnB      | CDS        |
| CFT073  | 733624       | 732814       | ns                         | out    | i02_0719   | nagD      | CDS        |
| CFT073  | 754691       | 754593       | s                          | out    | i02_0742   | ybfF      | CDS        |
| CFT073  | 778958       | 778797       | ns                         | out    | i02_0765   | abrB      | CDS        |
| ?       | 792960       | 792799       | s                          | out    | i02_0778   | /         | CDS        |
| CFT073  | 806217       | 806102       | ns                         | out    | i02_0795   | /         | CDS        |
| CFT073  | 824956       | 824841       | s                          | out    | i02_0814   | ybhI      | CDS        |
| CFT073  | 835133       | 835018       | ns                         | out    | i02_0823   | bioC      | CDS        |
| clone D | 837075       | 836960       | s                          | out    | i02_0826   | uvrB      | CDS        |
| clone D | 848444       | 848329       | s                          | out    | i02_0841   | ybhR      | CDS        |
| CFT073  | 863423       | 863308       | ns                         | out    | i02_0854   | ybiL      | CDS        |
| CFT073  | 864421       | 864306       | s                          | out    | i02_0855   | ybiM      | CDS        |
| clone D | 864770       | 864655       | ns                         | out    | i02_0855   | ybiM      | CDS        |
| clone D | 866117       | 866002       | ns                         | out    | i02_0857   | ybiO      | CDS        |
| CFT073  | 883494       | 883379       | ns                         | out    | i02_0872   | ybiW      | CDS        |
| CFT073  | 892207       | 892092       | ns                         | out    | i02_0880   | yliC      | CDS        |
| CFT073  | 909245       | 942611       | s                          | out    | i02_0896   | ybjL      | CDS        |
| clone D | 918512       | 951878       | ns                         | out    | i02_0906   | potI      | pseudogene |
| clone D | 982886       | 1016254      | ns                         | out    | i02_0963   | ycaI      | CDS        |
| CFT073  | 987068       | 1020437      | ns                         | out    | i02_0966   | ycaQ      | CDS        |
| CFT073  | 987082       | 1020451      | ns                         | out    | i02_0966   | ycaQ      | CDS        |
| clone D | 988324       | 1021693      | ns                         | out    | i02_0967   | ycaR      | CDS        |
| CFT073  | 1002042      | 1035411      | ns                         | out    | i02_0979   | aspC      | CDS        |
| clone D | 1011558      | 1044927      | ns                         | out    | i02_0984   | ssuB      | CDS        |
| CFT073  | 1013482      | 1046851      | ns                         | out    | i02_0986   | ycbN      | CDS        |
| CFT073  | 1017277      | 1050646      | ns                         | out    | i02_0991   | ycbX      | CDS        |
| CFT073  | 1017536      | 1050905      | s                          | out    | i02_0991   | ycbX      | CDS        |
| clone D | 1017888      | 1051257      | ns                         | out    | i02_0991   | ycbX      | CDS        |
| CFT073  | 1025532      | 1058901      | ns                         | out    | i02_0996   | ymbA      | CDS        |
| clone D | 1026896      | 1060265      | ns                         | out    | i02_0998   | fabA      | CDS        |
| CFT073  | 1043140      | 1076509      | s                          | out    | i02_1017   | hyaA      | CDS        |
| CFT073  | 1048389      | 1081758      | ns                         | out    | i02_1023   | appC      | CDS        |
| CFT073  | 1051361      | 1084730      | ns                         | out    | i02_1025   | appA      | CDS        |
| CFT073  | 1063558      | 1096927      | ns                         | out    | i02_1036   | torD      | CDS        |
| clone D | 1065603      | 1098972      | nc                         | out    | intergenic |           |            |
| clone D | 1071559      | 1104928      | s                          | out    | i02_1046   | ycdJ      | CDS        |
| CFT073  | 1073352      | 1106721      | s                          | out    | i02_1049   | /         | CDS        |
| clone D | 1074028      | 1107397      | ns                         | out    | i02_1049   | /         | CDS        |

| Lineage | Clone D site | CFT 073 site | mutation type <sup>a</sup> | recomb | Gene       | Gene name | Type |
|---------|--------------|--------------|----------------------------|--------|------------|-----------|------|
| ?       | 1125611      | 1158981      | nc                         | out    | intergenic |           |      |
| CFT073  | 1129793      | 1163163      | nc                         | out    | intergenic |           |      |
| ?       | 1131681      | 1165052      | nc                         | out    | intergenic |           |      |
| ?       | 1132196      | 1165567      | s                          | out    | i02_1100   | /         | CDS  |
| ?       | 1145111      | 1178484      | s                          | out    | i02_1120   | mchC      | CDS  |
| clone D | 1153965      | 1187338      | nc                         | out    | intergenic |           |      |
| CFT073  | 1172295      | 1205668      | s                          | out    | i02_1147   | iroC      | CDS  |
| CFT073  | 1194598      | 1229284      | s                          | out    | i02_1167   | /         | CDS  |
| CFT073  | 1195856      | 1230542      | ns                         | out    | i02_1167   | /         | CDS  |
| CFT073  | 1200857      | 1237959      | nc                         | out    | intergenic |           |      |
| CFT073  | 1203224      | 1241037      | nc                         | out    | intergenic |           |      |
| CFT073  | 1210308      | 1248122      | ns                         | out    | i02_1192   | csgA      | CDS  |
| clone D | 1212641      | 1250455      | ns                         | out    | i02_1196   | ymdC      | CDS  |
| clone D | 1235940      | 1273757      | ns                         | out    | i02_1225   | flgA      | CDS  |
| CFT073  | 1236058      | 1273875      | s                          | out    | i02_1225   | flgA      | CDS  |
| clone D | 1249884      | 1287701      | ns                         | out    | i02_1237   | rne       | CDS  |
| CFT073  | 1294835      | 1333367      | ns                         | out    | i02_1290   | ydfA      | CDS  |
| clone D | 1308118      | 1347361      | nc                         | out    | intergenic |           |      |
| CFT073  | 1311991      | 1351234      | s                          | out    | i02_1322   | /         | CDS  |
| clone D | 1320170      | 1359413      | s                          | out    | i02_1334   | /         | CDS  |
| clone D | 1322018      | 1361261      | s                          | rec    | i02_1334   | /         | CDS  |
| CFT073  | 1322019      | 1361262      | ns                         | rec    | i02_1334   | /         | CDS  |
| clone D | 1322021      | 1361264      | ns                         | rec    | i02_1334   | /         | CDS  |
| clone D | 1322033      | 1361276      | s                          | rec    | i02_1334   | /         | CDS  |
| clone D | 1322046      | 1361289      | ns                         | rec    | i02_1334   | /         | CDS  |
| clone D | 1322054      | 1361297      | s                          | rec    | i02_1334   | /         | CDS  |
| clone D | 1322058      | 1361301      | ns                         | rec    | i02_1334   | /         | CDS  |
| clone D | 1322060      | 1361303      | ns                         | rec    | i02_1334   | /         | CDS  |
| clone D | 1322063      | 1361306      | s                          | rec    | i02_1334   | /         | CDS  |
| clone D | 1322072      | 1361315      | s                          | rec    | i02_1334   | /         | CDS  |
| clone D | 1322084      | 1361327      | s                          | rec    | i02_1334   | /         | CDS  |
| CFT073  | 1323330      | 1362573      | s                          | out    | i02_1336   | /         | CDS  |
| clone D | 1332492      | 1371735      | nc                         | rec    | intergenic |           |      |
| clone D | 1332511      | 1371754      | nc                         | rec    | intergenic |           |      |
| clone D | 1332512      | 1371755      | nc                         | rec    | intergenic |           |      |
| clone D | 1332525      | 1371768      | nc                         | rec    | intergenic |           |      |
| clone D | 1332558      | 1371801      | nc                         | rec    | intergenic |           |      |
| clone D | 1332560      | 1371803      | nc                         | rec    | intergenic |           |      |
| clone D | 1332561      | 1371804      | nc                         | rec    | intergenic |           |      |
| clone D | 1332579      | 1371822      | nc                         | rec    | intergenic |           |      |
| clone D | 1332627      | 1371870      | ns                         | rec    | i02_1344   | /         | CDS  |
| CFT073  | 1343579      | 1394274      | s                          | out    | i02_1355   | mnmA      | CDS  |
| CFT073  | 1343615      | 1394310      | ns                         | out    | i02_1355   | mnmA      | CDS  |
| CFT073  | 1358433      | 1412847      | s                          | out    | i02_1383   | /         | CDS  |
| CFT073  | 1358517      | 1412935      | ns                         | out    | i02_1383   | /         | CDS  |
| clone D | 1363135      | 1418868      | ns                         | out    | i02_1392   | rus       | CDS  |
| clone D | 1364569      | 1420302      | ns                         | out    | i02_1395   | nmpC      | CDS  |
| clone D | 1365402      | 1421135      | ns                         | rec    | i02_1395   | nmpC      | CDS  |
| clone D | 1365404      | 1421137      | ns                         | rec    | i02_1395   | nmpC      | CDS  |
| clone D | 1365406      | 1421139      | ns                         | rec    | i02_1395   | nmpC      | CDS  |
| clone D | 1365427      | 1421160      | nc                         | rec    | intergenic |           |      |

| Lineage | Clone D site | CFT 073 site | mutation type <sup>a</sup> | recomb | Gene       | Gene name | Type       |
|---------|--------------|--------------|----------------------------|--------|------------|-----------|------------|
| clone D | 1371117      | 1426850      | ns                         | out    | i02_1406   | /         | CDS        |
| CFT073  | 1372049      | 1427782      | s                          | out    | i02_1408   | /         | CDS        |
| clone D | 1373356      | 1429089      | ns                         | out    | i02_1408   | /         | CDS        |
| CFT073  | 1374811      | 1430544      | nc                         | out    | intergenic |           |            |
| CFT073  | 1374984      | 1430717      | ns                         | out    | i02_1409   | /         | CDS        |
| CFT073  | 1374985      | 1430718      | ns                         | out    | i02_1409   | /         | CDS        |
| CFT073  | 1378342      | 1434074      | ns                         | out    | i02_1415   | /         | CDS        |
| clone D | 1378488      | 1434218      | s                          | rec    | i02_1415   | /         | CDS        |
| CFT073  | 1378491      | 1434221      | s                          | rec    | i02_1415   | /         | CDS        |
| CFT073  | 1378492      | 1434222      | ns                         | rec    | i02_1415   | /         | CDS        |
| clone D | 1382651      | 1438380      | s                          | out    | i02_1420   | /         | CDS        |
| CFT073  | 1389904      | 1445633      | ns                         | out    | i02_1424   | /         | CDS        |
| clone D | 1408061      | 1463784      | s                          | out    | i02_1454   | minC      | CDS        |
| CFT073  | 1413461      | 1469184      | ns                         | out    | i02_1463   | umuC      | CDS        |
| CFT073  | 1415941      | 1471664      | s                          | out    | i02_1465   | nhaB      | CDS        |
| CFT073  | 1422229      | 1477952      | s                          | out    | i02_1471   | ycgO      | CDS        |
| CFT073  | 1427882      | 1483605      | ns                         | out    | i02_1476   | prpA      | CDS        |
| CFT073  | 1439811      | 1495534      | ns                         | out    | i02_1489   | /         | CDS        |
| CFT073  | 1452981      | 1508704      | ns                         | out    | i02_1503   | kdsA      | CDS        |
| CFT073  | 1480109      | 1535832      | ns                         | out    | i02_1530   | hnr       | CDS        |
| CFT073  | 1486554      | 1542277      | ns                         | out    | i02_1537   | adhE      | CDS        |
| CFT073  | 1506794      | 1562517      | s                          | out    | i02_1559   | trpC      | CDS        |
| CFT073  | 1529648      | 1586082      | nc                         | out    | i02_1580   | pyrF      | pseudogene |
| clone D | 1531673      | 1588106      | s                          | out    | i02_1584   | yciT      | CDS        |
| CFT073  | 1586860      | 1643294      | ns                         | out    | i02_1636   | /         | CDS        |
| CFT073  | 1593037      | 1649471      | ns                         | out    | i02_1642   | dbpA      | CDS        |
| CFT073  | 1596208      | 1652642      | ns                         | out    | i02_1645   | /         | CDS        |
| clone D | 1618956      | 1675538      | s                          | out    | i02_1662   | ynbD      | CDS        |
| CFT073  | 1622436      | 1679018      | ns                         | out    | i02_1664   | hrpA      | CDS        |
| CFT073  | 1631370      | 1687952      | ns                         | out    | i02_1672   | ydcJ      | CDS        |
| CFT073  | 1643881      | 1700463      | ns                         | out    | i02_1687   | ydcR      | CDS        |
| clone D | 1663549      | 1720135      | ns                         | out    | i02_1710   | /         | CDS        |
| clone D | 1673112      | 1729696      | nc                         | out    | intergenic |           |            |
| CFT073  | 1701270      | 1757853      | nc                         | out    | intergenic |           |            |
| CFT073  | 1701329      | 1757912      | nc                         | out    | intergenic |           |            |
| CFT073  | 1715067      | 1771649      | ns                         | out    | i02_1752   | ydeP      | CDS        |
| CFT073  | 1724309      | 1781887      | ns                         | out    | i02_1761   | hipA      | CDS        |
| clone D | 1733001      | 1790581      | ns                         | out    | i02_1769   | ynel      | CDS        |
| CFT073  | 1741553      | 1799133      | s                          | out    | i02_1778   | /         | CDS        |
| clone D | 1742588      | 1800168      | s                          | out    | i02_1780   | /         | CDS        |
| CFT073  | 1760775      | 1818329      | ns                         | out    | i02_1799   | ynfD      | CDS        |
| clone D | 1781828      | 1839382      | s                          | out    | i02_1816   | ydgH      | CDS        |
| clone D | 1786712      | 1844266      | s                          | out    | i02_1821   | rstB      | CDS        |
| CFT073  | 1793213      | 1850767      | ns                         | out    | i02_1826   | ydgA      | CDS        |
| CFT073  | 1796475      | 1854029      | ns                         | out    | i02_1828   | uidB      | CDS        |
| clone D | 1802483      | 1860037      | s                          | out    | i02_1833   | malX      | CDS        |
| CFT073  | 1830257      | 1887811      | s                          | out    | i02_1865   | nemA      | CDS        |
| clone D | 1840635      | 1898189      | s                          | out    | i02_1878   | cfa       | CDS        |
| clone D | 1853236      | 1910790      | nc                         | out    | intergenic |           |            |
| CFT073  | 1855927      | 1913481      | nc                         | rec    | intergenic |           |            |
| CFT073  | 1855928      | 1913482      | nc                         | rec    | intergenic |           |            |

| Lineage | Clone D site | CFT 073 site | mutation type <sup>a</sup> | recomb | Gene       | Gene name | Type |
|---------|--------------|--------------|----------------------------|--------|------------|-----------|------|
| CFT073  | 1855940      | 1913494      | nc                         | rec    | intergenic |           |      |
| CFT073  | 1855949      | 1913503      | nc                         | rec    | intergenic |           |      |
| CFT073  | 1883806      | 1941360      | ns                         | out    | i02_1920   | ppsA      | CDS  |
| CFT073  | 1895916      | 1953470      | ns                         | out    | i02_1932   | pheT      | CDS  |
| CFT073  | 1908823      | 1966378      | s                          | out    | i02_1949   | ydjN      | CDS  |
| CFT073  | 1926109      | 1983664      | ns                         | out    | i02_1966   | /         | CDS  |
| CFT073  | 1929047      | 1986602      | s                          | out    | i02_1969   | xthA      | CDS  |
| clone D | 1946402      | 2003957      | ns                         | out    | i02_1985   | topB      | CDS  |
| CFT073  | 1961111      | 2018666      | nc                         | out    | intergenic |           |      |
| clone D | 1977237      | 2034790      | nc                         | out    | intergenic |           |      |
| CFT073  | 1986053      | 2043606      | s                          | out    | i02_2032   | /         | CDS  |
| CFT073  | 1987686      | 2045239      | s                          | out    | i02_2033   | yoaB      | CDS  |
| CFT073  | 1988983      | 2046536      | ns                         | out    | i02_2037   | pabB      | CDS  |
| clone D | 1998937      | 2056490      | s                          | out    | i02_2045   | yobD      | CDS  |
| clone D | 2002055      | 2059608      | nc                         | out    | intergenic |           |      |
| ?       | 2010225      | 2067779      | nc                         | out    | intergenic |           |      |
| CFT073  | 2017482      | 2075040      | nc                         | out    | intergenic |           |      |
| CFT073  | 2044891      | 2102449      | ns                         | out    | i02_2097   | yecD      | CDS  |
| CFT073  | 2044949      | 2102507      | s                          | out    | i02_2097   | yecD      | CDS  |
| clone D | 2054332      | 2111890      | s                          | out    | i02_2108   | argS      | CDS  |
| CFT073  | 2070718      | 2128276      | nc                         | out    | intergenic |           |      |
| CFT073  | 2070754      | 2128312      | nc                         | out    | intergenic |           |      |
| CFT073  | 2077269      | 2134821      | ns                         | out    | i02_2131   | araF      | CDS  |
| CFT073  | 2078871      | 2136423      | s                          | out    | i02_2133   | /         | CDS  |
| CFT073  | 2107023      | 2165287      | s                          | out    | i02_2169   | fliF      | CDS  |
| CFT073  | 2109941      | 2168205      | s                          | out    | i02_2172   | fliH      | CDS  |
| clone D | 2112295      | 2170559      | ns                         | out    | i02_2175   | fliK      | CDS  |
| CFT073  | 2135380      | 2193644      | ns                         | out    | i02_2204   | yodA      | CDS  |
| CFT073  | 2143727      | 2201991      | ns                         | out    | i02_2211   | /         | CDS  |
| CFT073  | 2159887      | 2218151      | nc                         | out    | intergenic |           |      |
| clone D | 2165206      | 2223470      | ns                         | out    | i02_2238   | /         | CDS  |
| CFT073  | 2170495      | 2228759      | ns                         | out    | i02_2241   | /         | CDS  |
| clone D | 2180055      | 2239019      | s                          | rec    | i02_2242   | /         | CDS  |
| clone D | 2180056      | 2239020      | s                          | rec    | i02_2242   | /         | CDS  |
| clone D | 2180064      | 2239026      | ns                         | rec    | i02_2242   | /         | CDS  |
| clone D | 2185505      | 2244467      | ns                         | out    | i02_2244   | /         | CDS  |
| clone D | 2190481      | 2249443      | nc                         | out    | intergenic |           |      |
| CFT073  | 2199173      | 2258133      | s                          | out    | i02_2255   | /         | CDS  |
| CFT073  | 2202789      | 2261749      | ns                         | out    | i02_2258   | yeeO      | CDS  |
| clone D | 2203718      | 2262678      | nc                         | out    | intergenic |           |      |
| CFT073  | 2237404      | 2296365      | s                          | out    | i02_2271   | /         | CDS  |
| CFT073  | 2240758      | 2299719      | s                          | out    | i02_2274   | /         | CDS  |
| CFT073  | 2240778      | 2299739      | ns                         | out    | i02_2274   | /         | CDS  |
| CFT073  | 2246105      | 2305066      | s                          | out    | i02_2279   | /         | CDS  |
| CFT073  | 2249273      | 2308234      | s                          | out    | i02_2279   | /         | CDS  |
| clone D | 2258968      | 2317914      | ns                         | out    | i02_2286   | erfK      | CDS  |
| clone D | 2275876      | 2334825      | ns                         | out    | i02_2302   | /         | CDS  |
| clone D | 2282740      | 2341764      | ns                         | out    | i02_2310   | /         | CDS  |
| CFT073  | 2290069      | 2351509      | nc                         | out    | intergenic |           |      |
| clone D | 2290636      | 2352076      | nc                         | out    | intergenic |           |      |
| CFT073  | 2293206      | 2354646      | s                          | out    | i02_2321   | /         | CDS  |

| Lineage | Clone D site | CFT 073 site | mutation type <sup>a</sup> | recomb | Gene       | Gene name | Type |
|---------|--------------|--------------|----------------------------|--------|------------|-----------|------|
| CFT073  | 2296423      | 2357863      | nc                         | rec    | intergenic |           |      |
| CFT073  | 2296445      | 2357885      | nc                         | rec    | intergenic |           |      |
| CFT073  | 2296515      | 2357955      | nc                         | rec    | intergenic |           |      |
| clone D | 2296517      | 2357957      | nc                         | rec    | intergenic |           |      |
| CFT073  | 2296518      | 2357958      | nc                         | rec    | intergenic |           |      |
| clone D | 2296557      | 2357997      | nc                         | rec    | intergenic |           |      |
| clone D | 2296559      | 2357999      | nc                         | rec    | intergenic |           |      |
| CFT073  | 2296666      | 2358106      | nc                         | rec    | intergenic |           |      |
| CFT073  | 2296690      | 2358130      | nc                         | rec    | intergenic |           |      |
| clone D | 2296802      | 2358242      | nc                         | rec    | intergenic |           |      |
| clone D | 2296803      | 2358243      | nc                         | rec    | intergenic |           |      |
| clone D | 2296816      | 2358256      | nc                         | rec    | intergenic |           |      |
| clone D | 2296817      | 2358257      | nc                         | rec    | intergenic |           |      |
| clone D | 2296820      | 2358260      | nc                         | rec    | intergenic |           |      |
| clone D | 2296825      | 2358265      | nc                         | rec    | intergenic |           |      |
| clone D | 2296826      | 2358266      | nc                         | rec    | intergenic |           |      |
| clone D | 2296835      | 2358275      | nc                         | rec    | intergenic |           |      |
| clone D | 2296838      | 2358278      | nc                         | rec    | intergenic |           |      |
| clone D | 2296845      | 2358285      | nc                         | rec    | intergenic |           |      |
| clone D | 2296990      | 2358430      | nc                         | rec    | intergenic |           |      |
| CFT073  | 2296992      | 2358432      | nc                         | rec    | intergenic |           |      |
| clone D | 2296994      | 2358434      | nc                         | rec    | intergenic |           |      |
| CFT073  | 2298518      | 2359959      | s                          | rec    | i02_2323   | /         | CDS  |
| CFT073  | 2299407      | 2360848      | ns                         | rec    | i02_2323   | /         | CDS  |
| clone D | 2299410      | 2360851      | s                          | rec    | i02_2323   | /         | CDS  |
| CFT073  | 2299700      | 2361141      | ns                         | rec    | i02_2325   | /         | CDS  |
| CFT073  | 2299712      | 2361153      | ns                         | rec    | i02_2325   | /         | CDS  |
| clone D | 2299990      | 2361431      | s                          | rec    | i02_2325   | /         | CDS  |
| clone D | 2300703      | 2362144      | s                          | rec    | i02_2326   | /         | CDS  |
| clone D | 2300793      | 2362234      | s                          | rec    | i02_2326   | /         | CDS  |
| CFT073  | 2309336      | 2370777      | nc                         | out    | intergenic |           |      |
| CFT073  | 2315229      | 2376670      | s                          | out    | i02_2343   | /         | CDS  |
| CFT073  | 2320221      | 2381662      | s                          | out    | i02_2349   | hisB      | CDS  |
| CFT073  | 2336808      | 2398250      | ns                         | out    | i02_2364   | /         | CDS  |
| CFT073  | 2339703      | 2401145      | ns                         | out    | i02_2366   | galF      | CDS  |
| clone D | 2345037      | 2406286      | s                          | out    | i02_2370   | wzxC      | CDS  |
| CFT073  | 2356361      | 2417610      | ns                         | out    | i02_2381   | wcaD      | CDS  |
| CFT073  | 2361324      | 2422573      | ns                         | out    | i02_2385   | /         | CDS  |
| CFT073  | 2362173      | 2423422      | s                          | out    | i02_2386   | /         | CDS  |
| CFT073  | 2362253      | 2423501      | ns                         | out    | i02_2386   | /         | CDS  |
| CFT073  | 2362254      | 2423502      | ns                         | out    | i02_2386   | /         | CDS  |
| CFT073  | 2365761      | 2427006      | s                          | out    | i02_2388   | yegH      | CDS  |
| clone D | 2376994      | 2438239      | s                          | out    | i02_2396   | yegI      | CDS  |
| clone D | 2394630      | 2455875      | s                          | out    | i02_2410   | /         | CDS  |
| clone D | 2405478      | 2466723      | ns                         | out    | i02_2422   | gatY      | CDS  |
| clone D | 2406271      | 2468227      | ns                         | out    | i02_2423   | /         | CDS  |
| CFT073  | 2409395      | 2471351      | s                          | rec    | i02_2426   | yegU      | CDS  |
| CFT073  | 2409418      | 2471374      | ns                         | rec    | i02_2426   | yegU      | CDS  |
| CFT073  | 2409443      | 2471399      | ns                         | rec    | i02_2426   | yegU      | CDS  |
| CFT073  | 2409465      | 2471421      | s                          | rec    | i02_2426   | yegU      | CDS  |
| clone D | 2414055      | 2476011      | nc                         | out    | intergenic |           |      |



| Lineage | Clone D site | CFT 073 site | mutation type <sup>a</sup> | recomb | Gene       | Gene name | Type       |
|---------|--------------|--------------|----------------------------|--------|------------|-----------|------------|
| CFT073  | 2428483      | 2491151      | ns                         | out    | i02_2442   | /         | CDS        |
| CFT073  | 2433356      | 2496024      | nc                         | out    | intergenic |           |            |
| CFT073  | 2440988      | 2503656      | ns                         | out    | i02_2452   | yehS      | CDS        |
| clone D | 2443259      | 2505927      | ns                         | out    | i02_2454   | yehU      | CDS        |
| clone D | 2443878      | 2506546      | nc                         | out    | intergenic |           |            |
| clone D | 2444543      | 2507211      | s                          | out    | i02_2455   | yehV      | CDS        |
| CFT073  | 2485863      | 2548531      | ns                         | rec    | i02_2500   | yeiN      | CDS        |
| CFT073  | 2485896      | 2548564      | ns                         | rec    | i02_2500   | yeiN      | CDS        |
| CFT073  | 2485899      | 2548567      | s                          | rec    | i02_2500   | yeiN      | CDS        |
| clone D | 2485913      | 2548581      | ns                         | rec    | i02_2500   | yeiN      | CDS        |
| ?       | 2485914      | 2548584      | ns                         | rec    | i02_2500   | yeiN      | CDS        |
| CFT073  | 2485917      | 2548587      | ns                         | rec    | i02_2500   | yeiN      | CDS        |
| CFT073  | 2485922      | 2548592      | ns                         | rec    | i02_2500   | yeiN      | CDS        |
| CFT073  | 2497637      | 2560307      | nc                         | out    | intergenic |           |            |
| CFT073  | 2506161      | 2568831      | nc                         | out    | intergenic |           |            |
| CFT073  | 2517522      | 2580192      | ns                         | out    | i02_2533   | dsbE      | CDS        |
| CFT073  | 2525558      | 2588228      | s                          | out    | i02_2544   | napA      | CDS        |
| CFT073  | 2542586      | 2605256      | s                          | out    | i02_2559   | rscC      | CDS        |
| CFT073  | 2618491      | 2681161      | ns                         | out    | i02_2622   | nuoG      | CDS        |
| CFT073  | 2625164      | 2687834      | ns                         | out    | i02_2628   | /         | CDS        |
| CFT073  | 2652749      | 2715419      | ns                         | out    | i02_2658   | accD      | CDS        |
| CFT073  | 2658773      | 2721443      | ns                         | out    | i02_2665   | yfcJ      | CDS        |
| clone D | 2665170      | 2727838      | s                          | out    | i02_2671   | mepA      | CDS        |
| clone D | 2685309      | 2747977      | s                          | out    | i02_2693   | /         | CDS        |
| CFT073  | 2695383      | 2758071      | nc                         | out    | intergenic |           |            |
| CFT073  | 2704159      | 2766847      | ns                         | out    | i02_2704   | evgS      | CDS        |
| clone D | 2715730      | 2778418      | ns                         | out    | i02_2712   | ddg       | CDS        |
| CFT073  | 2717882      | 2780570      | ns                         | out    | i02_2713   | yfdZ      | CDS        |
| CFT073  | 2718009      | 2780697      | ns                         | out    | i02_2714   | /         | CDS        |
| CFT073  | 2718020      | 2780707      | nc                         | out    | intergenic |           |            |
| CFT073  | 2724895      | 2787582      | ns                         | out    | i02_2720   | ypdE      | CDS        |
| CFT073  | 2739621      | 2802545      | ns                         | out    | i02_2734   | xapR      | CDS        |
| clone D | 2757922      | 2820848      | ns                         | out    | i02_2755   | cysW      | CDS        |
| CFT073  | 2783069      | 2845995      | ns                         | out    | i02_2783   | /         | CDS        |
| clone D | 2792952      | 2855878      | s                          | out    | i02_2790   | yffG      | CDS        |
| CFT073  | 2811130      | 2874056      | s                          | out    | i02_2807   | yfgC      | CDS        |
| CFT073  | 2838616      | 2901542      | ns                         | out    | i02_2826   | /         | CDS        |
| CFT073  | 2848250      | 2911176      | ns                         | out    | i02_2834   | yfgA      | CDS        |
| CFT073  | 2863200      | 2926117      | ns                         | out    | i02_2846   | hscA      | CDS        |
| CFT073  | 2871211      | 2934128      | ns                         | out    | i02_2856   | csiE      | CDS        |
| CFT073  | 2871849      | 2934766      | ns                         | out    | i02_2857   | hcaT      | CDS        |
| CFT073  | 2874724      | 2937641      | ns                         | out    | i02_2861   | yphB      | CDS        |
| clone D | 2885814      | 2948732      | s                          | out    | i02_2870   | hmpA      | CDS        |
| CFT073  | 2890031      | 2952949      | s                          | out    | i02_2874   | yfhK      | CDS        |
| clone D | 2896986      | 2959904      | ns                         | out    | i02_2876   | yfhD      | pseudogene |
| clone D | 2927090      | 2990008      | nc                         | rec    | 23s rRNA   | rrl       | rRNA       |
| clone D | 2927353      | 2990271      | nc                         | rec    | 23s rRNA   | rrl       | rRNA       |
| CFT073  | 2927412      | 2990330      | nc                         | rec    | 23s rRNA   | rrl       | rRNA       |
| CFT073  | 2927454      | 2990372      | nc                         | rec    | 23s rRNA   | rrl       | rRNA       |
| CFT073  | 2927730      | 2990648      | nc                         | rec    | 23s rRNA   | rrl       | rRNA       |
| CFT073  | 2927731      | 2990649      | nc                         | rec    | 23s rRNA   | rrl       | rRNA       |

| Lineage | Clone D site | CFT 073 site | mutation type <sup>a</sup> | recomb | Gene       | Gene name | Type |
|---------|--------------|--------------|----------------------------|--------|------------|-----------|------|
| CFT073  | 2927740      | 2990658      | nc                         | rec    | 23s rRNA   | rrl       | rRNA |
| CFT073  | 2927741      | 2990659      | nc                         | rec    | 23s rRNA   | rrl       | rRNA |
| CFT073  | 2927749      | 2990667      | nc                         | rec    | 23s rRNA   | rrl       | rRNA |
| CFT073  | 2927782      | 2990700      | nc                         | rec    | 23s rRNA   | rrl       | rRNA |
| CFT073  | 2927788      | 2990707      | nc                         | rec    | 23s rRNA   | rrl       | rRNA |
| CFT073  | 2928416      | 2991335      | nc                         | rec    | 23s rRNA   | rrl       | rRNA |
| clone D | 2928601      | 2991521      | nc                         | rec    | 23s rRNA   | rrl       | rRNA |
| CFT073  | 2928602      | 2991522      | nc                         | rec    | 23s rRNA   | rrl       | rRNA |
| clone D | 2928642      | 2991562      | nc                         | rec    | 23s rRNA   | rrl       | rRNA |
| CFT073  | 2928694      | 2991614      | nc                         | rec    | 23s rRNA   | rrl       | rRNA |
| CFT073  | 2928875      | 2991795      | nc                         | rec    | 23s rRNA   | rrl       | rRNA |
| CFT073  | 2929027      | 2991938      | nc                         | rec    | intergenic |           |      |
| CFT073  | 2929030      | 2991941      | nc                         | rec    | intergenic |           |      |
| CFT073  | 2929083      | 2991994      | nc                         | rec    | intergenic |           |      |
| CFT073  | 2929118      | 2992029      | nc                         | rec    | intergenic |           |      |
| CFT073  | 2929122      | 2992033      | nc                         | rec    | intergenic |           |      |
| CFT073  | 2929123      | 2992034      | nc                         | rec    | intergenic |           |      |
| CFT073  | 2929126      | 2992037      | nc                         | rec    | intergenic |           |      |
| CFT073  | 2929257      | 2992254      | nc                         | rec    | intergenic |           |      |
| CFT073  | 2929266      | 2992263      | nc                         | rec    | intergenic |           |      |
| CFT073  | 2929267      | 2992264      | nc                         | rec    | intergenic |           |      |
| CFT073  | 2929475      | 2992471      | nc                         | out    | 16s rRNA   | rrs       | rRNA |
| CFT073  | 2930220      | 2993220      | nc                         | out    | 16s rRNA   | rrs       | rRNA |
| CFT073  | 2930451      | 2993455      | nc                         | out    | 16s rRNA   | rrs       | rRNA |
| CFT073  | 2955443      | 3018449      | nc                         | out    | intergenic |           |      |
| CFT073  | 2955497      | 3018503      | nc                         | out    | intergenic |           |      |
| CFT073  | 2962639      | 3074078      | ns                         | out    | i02_2942   | gabP      | CDS  |
| clone D | 2966998      | 3078437      | ns                         | out    | i02_2952   | ygaC      | CDS  |
| clone D | 2968995      | 3080434      | s                          | out    | i02_2954   | /         | CDS  |
| clone D | 2995994      | 3107433      | s                          | out    | i02_2986   | mltB      | CDS  |
| clone D | 3029683      | 3141123      | s                          | out    | i02_3024   | pphB      | CDS  |
| CFT073  | 3061684      | 3173132      | ns                         | out    | i02_3058   | /         | CDS  |
| CFT073  | 3065845      | 3177293      | nc                         | out    | intergenic |           |      |
| CFT073  | 3067813      | 3179261      | ns                         | out    | i02_3065   | /         | CDS  |
| CFT073  | 3082607      | 3194070      | ns                         | out    | i02_3076   | ygcX      | CDS  |
| CFT073  | 3086823      | 3198288      | ns                         | out    | i02_3082   | yqcB      | CDS  |
| CFT073  | 3098292      | 3209757      | ns                         | out    | i02_3094   | fucP      | CDS  |
| CFT073  | 3115270      | 3226734      | s                          | out    | i02_3110   | /         | CDS  |
| CFT073  | 3116851      | 3228315      | s                          | out    | i02_3111   | /         | CDS  |
| clone D | 3128970      | 3240434      | ns                         | out    | i02_3119   | /         | CDS  |
| clone D | 3132900      | 3244364      | s                          | out    | i02_3121   | /         | CDS  |
| clone D | 3155664      | 3267126      | ns                         | out    | i02_3138   | recC      | CDS  |
| CFT073  | 3168315      | 3279777      | ns                         | out    | i02_3150   | tas       | CDS  |
| CFT073  | 3180307      | 3292480      | s                          | out    | i02_3160   | yqeF      | CDS  |
| CFT073  | 3185198      | 3297371      | ns                         | out    | i02_3163   | /         | CDS  |
| CFT073  | 3187493      | 3299666      | s                          | out    | i02_3164   | ygeT      | CDS  |
| clone D | 3196692      | 3308865      | nc                         | out    | intergenic |           |      |
| clone D | 3216776      | 3328949      | s                          | out    | i02_3184   | ygfU      | CDS  |
| clone D | 3237513      | 3350397      | s                          | out    | i02_3210   | pepP      | CDS  |
| CFT073  | 3255888      | 3368772      | s                          | out    | i02_3232   | frcK      | CDS  |
| CFT073  | 3256744      | 3369628      | ns                         | out    | i02_3233   | yggD      | CDS  |

| Lineage | Clone D site | CFT 073 site | mutation type <sup>a</sup> | recomb | Gene       | Gene name | Type |
|---------|--------------|--------------|----------------------------|--------|------------|-----------|------|
| clone D | 3261350      | 3374232      | s                          | out    | i02_3238   | /         | CDS  |
| clone D | 3261353      | 3374233      | ns                         | out    | i02_3238   | /         | CDS  |
| CFT073  | 3266500      | 3379379      | s                          | out    | i02_3242   | /         | CDS  |
| CFT073  | 3269374      | 3382253      | nc                         | out    | intergenic |           |      |
| CFT073  | 3269377      | 3382256      | nc                         | out    | intergenic |           |      |
| CFT073  | 3275727      | 3388606      | s                          | out    | i02_3251   | gshB      | CDS  |
| clone D | 3293438      | 3406317      | nc                         | out    | intergenic |           |      |
| CFT073  | 3294224      | 3407103      | s                          | rec    | i02_3273   | /         | CDS  |
| CFT073  | 3294230      | 3407109      | s                          | rec    | i02_3273   | /         | CDS  |
| CFT073  | 3294242      | 3407121      | s                          | rec    | i02_3273   | /         | CDS  |
| CFT073  | 3294267      | 3407146      | ns                         | rec    | i02_3273   | /         | CDS  |
| CFT073  | 3294270      | 3407149      | ns                         | rec    | i02_3273   | /         | CDS  |
| CFT073  | 3294281      | 3407160      | s                          | rec    | i02_3273   | /         | CDS  |
| CFT073  | 3294296      | 3407175      | s                          | rec    | i02_3273   | /         | CDS  |
| CFT073  | 3294299      | 3407178      | s                          | rec    | i02_3273   | /         | CDS  |
| CFT073  | 3294302      | 3407181      | s                          | rec    | i02_3273   | /         | CDS  |
| CFT073  | 3294332      | 3407211      | s                          | rec    | i02_3273   | /         | CDS  |
| CFT073  | 3294408      | 3407287      | ns                         | rec    | i02_3273   | /         | CDS  |
| CFT073  | 3294431      | 3407310      | s                          | rec    | i02_3273   | /         | CDS  |
| CFT073  | 3294435      | 3407314      | ns                         | rec    | i02_3273   | /         | CDS  |
| clone D | 3295195      | 3408074      | ns                         | rec    | i02_3274   | /         | CDS  |
| CFT073  | 3295338      | 3408217      | ns                         | rec    | i02_3274   | /         | CDS  |
| clone D | 3295341      | 3408220      | s                          | rec    | i02_3274   | /         | CDS  |
| CFT073  | 3295391      | 3408270      | s                          | rec    | i02_3274   | /         | CDS  |
| clone D | 3295410      | 3408289      | ns                         | rec    | i02_3274   | /         | CDS  |
| CFT073  | 3296118      | 3408997      | ns                         | rec    | i02_3274   | /         | CDS  |
| CFT073  | 3296224      | 3409103      | nc                         | rec    | intergenic |           |      |
| CFT073  | 3296276      | 3409155      | nc                         | rec    | intergenic |           |      |
| CFT073  | 3296420      | 3409299      | ns                         | rec    | i02_3275   | /         | CDS  |
| CFT073  | 3296553      | 3409420      | s                          | rec    | i02_3275   | /         | CDS  |
| clone D | 3296658      | 3409525      | nc                         | rec    | intergenic |           |      |
| clone D | 3296659      | 3409526      | nc                         | rec    | intergenic |           |      |
| CFT073  | 3297837      | 3428739      | nc                         | rec    | intergenic |           |      |
| CFT073  | 3297854      | 3428756      | nc                         | rec    | intergenic |           |      |
| CFT073  | 3297859      | 3428761      | nc                         | rec    | intergenic |           |      |
| CFT073  | 3297865      | 3428767      | nc                         | rec    | intergenic |           |      |
| CFT073  | 3297866      | 3428768      | nc                         | rec    | intergenic |           |      |
| CFT073  | 3297872      | 3428774      | nc                         | rec    | intergenic |           |      |
| CFT073  | 3297874      | 3428776      | nc                         | rec    | intergenic |           |      |
| CFT073  | 3297887      | 3428789      | ns                         | rec    | i02_3278   | papX      | CDS  |
| CFT073  | 3297893      | 3428795      | ns                         | rec    | i02_3278   | papX      | CDS  |
| CFT073  | 3297894      | 3428796      | ns                         | rec    | i02_3278   | papX      | CDS  |
| CFT073  | 3297897      | 3428799      | ns                         | rec    | i02_3278   | papX      | CDS  |
| CFT073  | 3297901      | 3428803      | s                          | rec    | i02_3278   | papX      | CDS  |
| clone D | 3297910      | 3428812      | s                          | rec    | i02_3278   | papX      | CDS  |
| CFT073  | 3297959      | 3428861      | ns                         | rec    | i02_3278   | papX      | CDS  |
| CFT073  | 3298070      | 3428972      | ns                         | rec    | i02_3278   | papX      | CDS  |
| CFT073  | 3298174      | 3429076      | ns                         | rec    | i02_3278   | papX      | CDS  |
| CFT073  | 3298175      | 3429077      | ns                         | rec    | i02_3278   | papX      | CDS  |
| CFT073  | 3298211      | 3429113      | ns                         | rec    | i02_3278   | papX      | CDS  |
| CFT073  | 3298288      | 3429190      | s                          | rec    | i02_3278   | papX      | CDS  |

| Lineage | Clone D site | CFT 073 site | mutation type <sup>a</sup> | recomb | Gene       | Gene name | Type       |
|---------|--------------|--------------|----------------------------|--------|------------|-----------|------------|
| CFT073  | 3298303      | 3429205      | s                          | rec    | i02_3278   | papX      | CDS        |
| CFT073  | 3298472      | 3429374      | nc                         | rec    | intergenic |           |            |
| CFT073  | 3298487      | 3429389      | nc                         | rec    | intergenic |           |            |
| CFT073  | 3298490      | 3429392      | nc                         | rec    | intergenic |           |            |
| CFT073  | 3298494      | 3429396      | nc                         | rec    | intergenic |           |            |
| CFT073  | 3298495      | 3429397      | nc                         | rec    | intergenic |           |            |
| CFT073  | 3298496      | 3429398      | nc                         | rec    | intergenic |           |            |
| CFT073  | 3298498      | 3429400      | nc                         | rec    | intergenic |           |            |
| CFT073  | 3298501      | 3429403      | nc                         | rec    | intergenic |           |            |
| CFT073  | 3298505      | 3429408      | nc                         | rec    | intergenic |           |            |
| CFT073  | 3298512      | 3429415      | nc                         | rec    | intergenic |           |            |
| CFT073  | 3298524      | 3429427      | nc                         | rec    | intergenic |           |            |
| CFT073  | 3298528      | 3429431      | nc                         | rec    | intergenic |           |            |
| CFT073  | 3299818      | 3437355      | nc                         | rec    | i02_3282   | /         | pseudogene |
| CFT073  | 3299820      | 3437357      | nc                         | rec    | i02_3282   | /         | pseudogene |
| CFT073  | 3299821      | 3437358      | nc                         | rec    | i02_3282   | /         | pseudogene |
| CFT073  | 3299839      | 3437376      | nc                         | rec    | i02_3282   | /         | pseudogene |
| CFT073  | 3299848      | 3437385      | nc                         | rec    | i02_3282   | /         | pseudogene |
| clone D | 3299851      | 3437388      | nc                         | rec    | i02_3282   | /         | pseudogene |
| clone D | 3299853      | 3437390      | nc                         | rec    | i02_3282   | /         | pseudogene |
| clone D | 3299854      | 3437391      | nc                         | rec    | i02_3282   | /         | pseudogene |
| clone D | 3299855      | 3437392      | nc                         | rec    | i02_3282   | /         | pseudogene |
| clone D | 3299856      | 3437393      | nc                         | rec    | i02_3282   | /         | pseudogene |
| clone D | 3299858      | 3437395      | nc                         | rec    | i02_3282   | /         | pseudogene |
| clone D | 3299859      | 3437396      | nc                         | rec    | i02_3282   | /         | pseudogene |
| CFT073  | 3299863      | 3437400      | nc                         | rec    | i02_3282   | /         | pseudogene |
| CFT073  | 3299865      | 3437402      | nc                         | rec    | i02_3282   | /         | pseudogene |
| CFT073  | 3299866      | 3437403      | nc                         | rec    | i02_3282   | /         | pseudogene |
| CFT073  | 3299872      | 3437409      | nc                         | rec    | i02_3282   | /         | pseudogene |
| CFT073  | 3299878      | 3437415      | nc                         | rec    | i02_3282   | /         | pseudogene |
| CFT073  | 3299881      | 3437418      | nc                         | rec    | i02_3282   | /         | pseudogene |
| clone D | 3299896      | 3437433      | nc                         | rec    | i02_3282   | /         | pseudogene |
| clone D | 3299903      | 3437440      | nc                         | rec    | i02_3282   | /         | pseudogene |
| CFT073  | 3299917      | 3437454      | nc                         | rec    | i02_3282   | /         | pseudogene |
| clone D | 3299921      | 3437458      | nc                         | rec    | i02_3282   | /         | pseudogene |
| clone D | 3299927      | 3437464      | nc                         | rec    | i02_3282   | /         | pseudogene |
| CFT073  | 3299937      | 3437474      | nc                         | rec    | i02_3282   | /         | pseudogene |
| CFT073  | 3299939      | 3437476      | nc                         | rec    | i02_3282   | /         | pseudogene |
| clone D | 3300156      | 3437692      | nc                         | rec    | intergenic |           |            |
| CFT073  | 3300217      | 3437753      | nc                         | rec    | intergenic |           |            |
| CFT073  | 3300438      | 3437975      | s                          | rec    | i02_3284   | /         | CDS        |
| clone D | 3300442      | 3437979      | ns                         | rec    | i02_3284   | /         | CDS        |
| clone D | 3300450      | 3437987      | s                          | rec    | i02_3284   | /         | CDS        |
| clone D | 3300651      | 3438188      | nc                         | rec    | intergenic |           |            |
| CFT073  | 3300656      | 3438193      | nc                         | rec    | intergenic |           |            |
| clone D | 3300661      | 3438198      | nc                         | rec    | intergenic |           |            |
| clone D | 3300662      | 3438199      | nc                         | rec    | intergenic |           |            |
| CFT073  | 3300667      | 3438204      | nc                         | rec    | intergenic |           |            |
| CFT073  | 3300669      | 3438206      | nc                         | rec    | intergenic |           |            |
| CFT073  | 3300675      | 3438212      | nc                         | rec    | intergenic |           |            |
| CFT073  | 3300676      | 3438213      | nc                         | rec    | intergenic |           |            |

| Lineage | Clone D site | CFT 073 site | mutation type <sup>a</sup> | recomb | Gene       | Gene name | Type       |
|---------|--------------|--------------|----------------------------|--------|------------|-----------|------------|
| CFT073  | 3300677      | 3438214      | nc                         | rec    | intergenic |           |            |
| CFT073  | 3300678      | 3438215      | nc                         | rec    | intergenic |           |            |
| CFT073  | 3300700      | 3438237      | nc                         | rec    | intergenic |           |            |
| CFT073  | 3300736      | 3438273      | nc                         | rec    | intergenic |           |            |
| CFT073  | 3300758      | 3438295      | nc                         | rec    | intergenic |           |            |
| CFT073  | 3300770      | 3438307      | nc                         | rec    | intergenic |           |            |
| CFT073  | 3300773      | 3438310      | nc                         | rec    | intergenic |           |            |
| CFT073  | 3300799      | 3438336      | nc                         | rec    | intergenic |           |            |
| CFT073  | 3300804      | 3438341      | nc                         | rec    | intergenic |           |            |
| CFT073  | 3300827      | 3438364      | nc                         | rec    | intergenic |           |            |
| CFT073  | 3300844      | 3438381      | nc                         | rec    | intergenic |           |            |
| CFT073  | 3300968      | 3438505      | ns                         | rec    | i02_3286   | papl      | CDS        |
| CFT073  | 3300982      | 3438519      | s                          | rec    | i02_3286   | papl      | CDS        |
| CFT073  | 3300994      | 3438531      | s                          | rec    | i02_3286   | papl      | CDS        |
| clone D | 3301018      | 3438555      | s                          | rec    | i02_3286   | papl      | CDS        |
| CFT073  | 3301024      | 3438561      | s                          | rec    | i02_3286   | papl      | CDS        |
| CFT073  | 3301053      | 3438590      | ns                         | rec    | i02_3286   | papl      | CDS        |
| clone D | 3301058      | 3438595      | ns                         | rec    | i02_3286   | papl      | CDS        |
| CFT073  | 3301072      | 3438609      | s                          | rec    | i02_3286   | papl      | CDS        |
| CFT073  | 3301081      | 3438618      | s                          | rec    | i02_3286   | papl      | CDS        |
| CFT073  | 3301084      | 3438621      | s                          | rec    | i02_3286   | papl      | CDS        |
| CFT073  | 3301103      | 3438640      | ns                         | rec    | i02_3286   | papl      | CDS        |
| clone D | 3301134      | 3438671      | ns                         | rec    | i02_3286   | papl      | CDS        |
| CFT073  | 3301207      | 3438744      | nc                         | rec    | intergenic |           |            |
| CFT073  | 3301259      | 3438796      | nc                         | rec    | intergenic |           |            |
| clone D | 3301601      | 3439138      | nc                         | rec    | intergenic |           |            |
| clone D | 3301681      | 3439218      | nc                         | rec    | intergenic |           |            |
| clone D | 3301806      | 3439343      | nc                         | rec    | i02_3287   | /         | pseudogene |
| CFT073  | 3301871      | 3439408      | nc                         | rec    | i02_3287   | /         | pseudogene |
| CFT073  | 3302088      | 3439625      | nc                         | rec    | i02_3287   | /         | pseudogene |
| CFT073  | 3302195      | 3439732      | nc                         | rec    | i02_3287   | /         | pseudogene |
| clone D | 3302450      | 3439986      | nc                         | rec    | i02_3287   | /         | pseudogene |
| clone D | 3302473      | 3440009      | nc                         | rec    | i02_3287   | /         | pseudogene |
| clone D | 3302474      | 3440010      | nc                         | rec    | i02_3287   | /         | pseudogene |
| clone D | 3302475      | 3440011      | nc                         | rec    | i02_3287   | /         | pseudogene |
| clone D | 3302503      | 3440039      | nc                         | rec    | i02_3287   | /         | pseudogene |
| CFT073  | 3302505      | 3440041      | nc                         | rec    | i02_3287   | /         | pseudogene |
| clone D | 3302546      | 3440082      | nc                         | rec    | i02_3287   | /         | pseudogene |
| CFT073  | 3302780      | 3440316      | nc                         | rec    | intergenic |           |            |
| CFT073  | 3302812      | 3440348      | nc                         | rec    | intergenic |           |            |
| clone D | 3302823      | 3440359      | nc                         | rec    | intergenic |           |            |
| CFT073  | 3302843      | 3440379      | nc                         | rec    | intergenic |           |            |
| clone D | 3302954      | 3440490      | nc                         | rec    | intergenic |           |            |
| CFT073  | 3303385      | 3440921      | nc                         | rec    | intergenic |           |            |
| CFT073  | 3303388      | 3440924      | nc                         | rec    | intergenic |           |            |
| CFT073  | 3303391      | 3440927      | nc                         | rec    | intergenic |           |            |
| clone D | 3303526      | 3441062      | nc                         | rec    | intergenic |           |            |
| CFT073  | 3303660      | 3441196      | nc                         | rec    | intergenic |           |            |
| CFT073  | 3304080      | 3441608      | ns                         | rec    | i02_3289   | /         | CDS        |
| CFT073  | 3304283      | 3441811      | ns                         | rec    | i02_3289   | /         | CDS        |
| CFT073  | 3304329      | 3441857      | ns                         | rec    | i02_3289   | /         | CDS        |

| Lineage | Clone D site | CFT 073 site | mutation type <sup>a</sup> | recomb | Gene       | Gene name | Type |
|---------|--------------|--------------|----------------------------|--------|------------|-----------|------|
| CFT073  | 3304390      | 3441918      | ns                         | rec    | i02_3290   | /         | CDS  |
| CFT073  | 3304962      | 3442490      | nc                         | rec    | intergenic |           |      |
| CFT073  | 3305225      | 3442753      | s                          | rec    | i02_3291   | /         | CDS  |
| CFT073  | 3305488      | 3443016      | s                          | rec    | i02_3292   | /         | CDS  |
| clone D | 3305778      | 3443306      | ns                         | rec    | i02_3292   | /         | CDS  |
| CFT073  | 3306079      | 3443607      | s                          | rec    | i02_3293   | /         | CDS  |
| CFT073  | 3306278      | 3443806      | ns                         | rec    | i02_3293   | /         | CDS  |
| ?       | 3306947      | 3444082      | nc                         | rec    | intergenic |           |      |
| ?       | 3307024      | 3444159      | s                          | rec    | i02_3294   | /         | CDS  |
| CFT073  | 3307069      | 3444204      | s                          | rec    | i02_3294   | /         | CDS  |
| CFT073  | 3307156      | 3444291      | s                          | rec    | i02_3294   | /         | CDS  |
| ?       | 3307182      | 3444317      | ns                         | rec    | i02_3294   | /         | CDS  |
| ?       | 3307192      | 3444327      | s                          | rec    | i02_3294   | /         | CDS  |
| clone D | 3307195      | 3444330      | s                          | rec    | i02_3294   | /         | CDS  |
| clone D | 3307231      | 3444366      | s                          | rec    | i02_3294   | /         | CDS  |
| clone D | 3307261      | 3444396      | s                          | rec    | i02_3294   | /         | CDS  |
| clone D | 3307270      | 3444405      | s                          | rec    | i02_3294   | /         | CDS  |
| clone D | 3307321      | 3444455      | s                          | rec    | i02_3294   | /         | CDS  |
| ?       | 3307344      | 3444478      | ns                         | rec    | i02_3294.2 | /         | CDS  |
| ?       | 3307377      | 3444511      | ns                         | rec    | i02_3294.2 | /         | CDS  |
| CFT073  | 3307432      | 3444566      | ns                         | rec    | i02_3294.2 | /         | CDS  |
| CFT073  | 3307445      | 3444579      | ns                         | rec    | i02_3294.2 | /         | CDS  |
| CFT073  | 3307449      | 3444583      | s                          | rec    | i02_3294.2 | /         | CDS  |
| ?       | 3307461      | 3444595      | s                          | rec    | i02_3294.2 | /         | CDS  |
| ?       | 3307470      | 3444604      | s                          | rec    | i02_3294.2 | /         | CDS  |
| ?       | 3307490      | 3444624      | ns                         | rec    | i02_3294.2 | /         | CDS  |
| ?       | 3307498      | 3444632      | ns                         | rec    | i02_3294.2 | /         | CDS  |
| ?       | 3307518      | 3444652      | s                          | rec    | i02_3294.2 | /         | CDS  |
| ?       | 3307524      | 3444658      | s                          | rec    | i02_3294.2 | /         | CDS  |
| ?       | 3307563      | 3444697      | s                          | rec    | i02_3294.2 | /         | CDS  |
| ?       | 3307564      | 3444698      | ns                         | rec    | i02_3294.2 | /         | CDS  |
| clone D | 3307566      | 3444700      | ns                         | rec    | i02_3294.2 | /         | CDS  |
| ?       | 3307613      | 3444747      | ns                         | rec    | i02_3294.2 | /         | CDS  |
| ?       | 3307648      | 3444782      | ns                         | rec    | i02_3294.2 | /         | CDS  |
| ?       | 3307680      | 3444814      | s                          | rec    | i02_3294.2 | /         | CDS  |
| CFT073  | 3307685      | 3444819      | ns                         | rec    | i02_3294.2 | /         | CDS  |
| clone D | 3307692      | 3444826      | s                          | rec    | i02_3294.2 | /         | CDS  |
| clone D | 3307704      | 3444838      | s                          | rec    | i02_3294.2 | /         | CDS  |
| ?       | 3307731      | 3444865      | s                          | rec    | i02_3294.2 | /         | CDS  |
| CFT073  | 3307764      | 3444898      | s                          | rec    | i02_3294.2 | /         | CDS  |
| ?       | 3307818      | 3444952      | s                          | rec    | i02_3294.2 | /         | CDS  |
| ?       | 3307824      | 3444958      | s                          | rec    | i02_3294.2 | /         | CDS  |
| ?       | 3307866      | 3445000      | s                          | rec    | i02_3294.2 | /         | CDS  |
| clone D | 3307881      | 3445015      | s                          | rec    | i02_3294.2 | /         | CDS  |
| clone D | 3307886      | 3445020      | ns                         | rec    | i02_3294.2 | /         | CDS  |
| ?       | 3307908      | 3445042      | s                          | rec    | i02_3294.2 | /         | CDS  |
| ?       | 3307944      | 3445078      | s                          | rec    | i02_3294.2 | /         | CDS  |
| ?       | 3307956      | 3445090      | s                          | rec    | i02_3294.2 | /         | CDS  |
| clone D | 3307966      | 3445100      | s                          | rec    | i02_3294.2 | /         | CDS  |
| ?       | 3307998      | 3445132      | s                          | rec    | i02_3294.2 | /         | CDS  |
| ?       | 3308022      | 3445156      | s                          | rec    | i02_3294.2 | /         | CDS  |

| Lineage | Clone D site | CFT 073 site | mutation type <sup>a</sup> | recomb | Gene       | Gene name | Type |
|---------|--------------|--------------|----------------------------|--------|------------|-----------|------|
| ?       | 3308073      | 3445207      | ns                         | rec    | i02_3294.2 | /         | CDS  |
| clone D | 3308155      | 3445289      | s                          | rec    | i02_3294.2 | /         | CDS  |
| clone D | 3308191      | 3445325      | ns                         | rec    | i02_3294.2 | /         | CDS  |
| ?       | 3308197      | 3445331      | ns                         | rec    | i02_3294.2 | /         | CDS  |
| ?       | 3308200      | 3445334      | ns                         | rec    | i02_3294.2 | /         | CDS  |
| clone D | 3308220      | 3445354      | s                          | rec    | i02_3294.2 | /         | CDS  |
| CFT073  | 3308660      | 3445794      | nc                         | rec    | intergenic |           |      |
| CFT073  | 3308694      | 3445828      | nc                         | rec    | intergenic |           |      |
| clone D | 3308827      | 3445961      | s                          | rec    | i02_3295   | /         | CDS  |
| CFT073  | 3309474      | 3446608      | ns                         | rec    | i02_3295   | /         | CDS  |
| CFT073  | 3309942      | 3447076      | ns                         | rec    | i02_3295   | /         | CDS  |
| CFT073  | 3310139      | 3447273      | ns                         | rec    | i02_3295   | /         | CDS  |
| CFT073  | 3310171      | 3447305      | s                          | rec    | i02_3295   | /         | CDS  |
| CFT073  | 3310870      | 3448004      | nc                         | rec    | intergenic |           |      |
| clone D | 3311048      | 3448182      | nc                         | rec    | intergenic |           |      |
| clone D | 3311422      | 3450966      | nc                         | rec    | intergenic |           |      |
| ?       | 3311423      | 3450967      | nc                         | rec    | intergenic |           |      |
| ?       | 3311686      | 3451235      | s                          | rec    | i02_3297   | /         | CDS  |
| ?       | 3311716      | 3451265      | s                          | rec    | i02_3297   | /         | CDS  |
| clone D | 3311782      | 3451331      | s                          | rec    | i02_3297   | /         | CDS  |
| clone D | 3311819      | 3451368      | ns                         | rec    | i02_3297   | /         | CDS  |
| clone D | 3311914      | 3451463      | s                          | rec    | i02_3297   | /         | CDS  |
| CFT073  | 3311941      | 3451490      | nc                         | rec    | intergenic |           |      |
| CFT073  | 3312233      | 3451782      | ns                         | rec    | i02_3299   | /         | CDS  |
| clone D | 3312309      | 3451858      | ns                         | rec    | i02_3299   | /         | CDS  |
| CFT073  | 3312316      | 3451865      | ns                         | rec    | i02_3299   | /         | CDS  |
| CFT073  | 3312383      | 3451932      | ns                         | rec    | i02_3299   | /         | CDS  |
| CFT073  | 3312384      | 3451933      | ns                         | rec    | i02_3299   | /         | CDS  |
| CFT073  | 3312390      | 3451939      | s                          | rec    | i02_3299   | /         | CDS  |
| CFT073  | 3312394      | 3451943      | ns                         | rec    | i02_3299   | /         | CDS  |
| CFT073  | 3312426      | 3451975      | s                          | rec    | i02_3299   | /         | CDS  |
| CFT073  | 3312716      | 3452265      | ns                         | rec    | i02_3300   | /         | CDS  |
| clone D | 3312792      | 3452341      | s                          | rec    | i02_3300   | /         | CDS  |
| ?       | 3312987      | 3452536      | ns                         | rec    | i02_3301   | /         | CDS  |
| clone D | 3313102      | 3452651      | s                          | rec    | i02_3301   | /         | CDS  |
| clone D | 3316143      | 3455659      | nc                         | rec    | intergenic |           |      |
| clone D | 3316224      | 3455740      | s                          | rec    | i02_3308   | /         | CDS  |
| CFT073  | 3316401      | 3455917      | s                          | rec    | i02_3308   | /         | CDS  |
| CFT073  | 3316496      | 3456012      | ns                         | rec    | i02_3308   | /         | CDS  |
| clone D | 3319441      | 3456467      | s                          | rec    | i02_3313   | sat       | CDS  |
| clone D | 3319594      | 3456620      | s                          | rec    | i02_3313   | sat       | CDS  |
| CFT073  | 3320101      | 3457127      | ns                         | rec    | i02_3313   | sat       | CDS  |
| CFT073  | 3320544      | 3457570      | ns                         | rec    | i02_3313   | sat       | CDS  |
| CFT073  | 3320698      | 3457724      | s                          | rec    | i02_3313   | sat       | CDS  |
| clone D | 3320950      | 3457976      | s                          | rec    | i02_3313   | sat       | CDS  |
| CFT073  | 3321039      | 3458065      | ns                         | rec    | i02_3313   | sat       | CDS  |
| CFT073  | 3321218      | 3458244      | ns                         | rec    | i02_3313   | sat       | CDS  |
| clone D | 3321352      | 3458378      | s                          | rec    | i02_3313   | sat       | CDS  |
| clone D | 3321390      | 3458416      | ns                         | rec    | i02_3313   | sat       | CDS  |
| CFT073  | 3321403      | 3458429      | s                          | rec    | i02_3313   | sat       | CDS  |
| CFT073  | 3321489      | 3458515      | ns                         | rec    | i02_3313   | sat       | CDS  |

| Lineage | Clone D site | CFT 073 site | mutation type <sup>a</sup> | recomb | Gene       | Gene name | Type |
|---------|--------------|--------------|----------------------------|--------|------------|-----------|------|
| CFT073  | 3321796      | 3458822      | s                          | rec    | i02_3313   | sat       | CDS  |
| CFT073  | 3322170      | 3459196      | ns                         | rec    | i02_3314   | /         | CDS  |
| clone D | 3322270      | 3459296      | s                          | rec    | i02_3313   | sat       | CDS  |
| CFT073  | 3322805      | 3459831      | ns                         | rec    | i02_3313   | sat       | CDS  |
| CFT073  | 3322831      | 3459857      | s                          | rec    | i02_3313   | sat       | CDS  |
| CFT073  | 3323432      | 3460458      | nc                         | rec    | intergenic |           |      |
| clone D | 3323620      | 3460646      | nc                         | rec    | intergenic |           |      |
| CFT073  | 3323879      | 3460905      | nc                         | rec    | intergenic |           |      |
| CFT073  | 3324164      | 3461190      | nc                         | rec    | intergenic |           |      |
| clone D | 3324179      | 3461205      | s                          | rec    | i02_3316   | iutA      | CDS  |
| clone D | 3324208      | 3461234      | s                          | rec    | i02_3316   | iutA      | CDS  |
| clone D | 3324230      | 3461256      | s                          | rec    | i02_3316   | iutA      | CDS  |
| clone D | 3324233      | 3461259      | s                          | rec    | i02_3316   | iutA      | CDS  |
| clone D | 3324260      | 3461286      | s                          | rec    | i02_3316   | iutA      | CDS  |
| clone D | 3324272      | 3461298      | s                          | rec    | i02_3316   | iutA      | CDS  |
| clone D | 3324287      | 3461313      | s                          | rec    | i02_3316   | iutA      | CDS  |
| clone D | 3324308      | 3461334      | s                          | rec    | i02_3316   | iutA      | CDS  |
| clone D | 3324313      | 3461339      | ns                         | rec    | i02_3316   | iutA      | CDS  |
| clone D | 3324329      | 3461355      | s                          | rec    | i02_3316   | iutA      | CDS  |
| clone D | 3324344      | 3461370      | ns                         | rec    | i02_3316   | iutA      | CDS  |
| clone D | 3324345      | 3461371      | ns                         | rec    | i02_3316   | iutA      | CDS  |
| clone D | 3324350      | 3461376      | ns                         | rec    | i02_3316   | iutA      | CDS  |
| clone D | 3324352      | 3461378      | ns                         | rec    | i02_3316   | iutA      | CDS  |
| clone D | 3324355      | 3461381      | ns                         | rec    | i02_3316   | iutA      | CDS  |
| clone D | 3324356      | 3461382      | ns                         | rec    | i02_3316   | iutA      | CDS  |
| clone D | 3324358      | 3461384      | ns                         | rec    | i02_3316   | iutA      | CDS  |
| clone D | 3324362      | 3461388      | s                          | rec    | i02_3316   | iutA      | CDS  |
| clone D | 3324368      | 3461394      | s                          | rec    | i02_3316   | iutA      | CDS  |
| clone D | 3324371      | 3461397      | s                          | rec    | i02_3316   | iutA      | CDS  |
| clone D | 3324374      | 3461400      | s                          | rec    | i02_3316   | iutA      | CDS  |
| clone D | 3324379      | 3461405      | ns                         | rec    | i02_3316   | iutA      | CDS  |
| clone D | 3324380      | 3461406      | ns                         | rec    | i02_3316   | iutA      | CDS  |
| clone D | 3324382      | 3461408      | ns                         | rec    | i02_3316   | iutA      | CDS  |
| clone D | 3324383      | 3461409      | ns                         | rec    | i02_3316   | iutA      | CDS  |
| clone D | 3324385      | 3461411      | ns                         | rec    | i02_3316   | iutA      | CDS  |
| clone D | 3324388      | 3461414      | ns                         | rec    | i02_3316   | iutA      | CDS  |
| clone D | 3324389      | 3461415      | s                          | rec    | i02_3316   | iutA      | CDS  |
| clone D | 3324394      | 3461420      | ns                         | rec    | i02_3316   | iutA      | CDS  |
| clone D | 3324395      | 3461421      | s                          | rec    | i02_3316   | iutA      | CDS  |
| clone D | 3324398      | 3461424      | s                          | rec    | i02_3316   | iutA      | CDS  |
| clone D | 3324404      | 3461430      | s                          | rec    | i02_3316   | iutA      | CDS  |
| clone D | 3324410      | 3461436      | s                          | rec    | i02_3316   | iutA      | CDS  |
| clone D | 3324413      | 3461439      | s                          | rec    | i02_3316   | iutA      | CDS  |
| clone D | 3324416      | 3461442      | s                          | rec    | i02_3316   | iutA      | CDS  |
| clone D | 3324428      | 3461454      | s                          | rec    | i02_3316   | iutA      | CDS  |
| clone D | 3324431      | 3461457      | s                          | rec    | i02_3316   | iutA      | CDS  |
| clone D | 3324446      | 3461472      | ns                         | rec    | i02_3316   | iutA      | CDS  |
| clone D | 3324452      | 3461478      | s                          | rec    | i02_3316   | iutA      | CDS  |
| clone D | 3324459      | 3461485      | ns                         | rec    | i02_3316   | iutA      | CDS  |
| clone D | 3324460      | 3461486      | ns                         | rec    | i02_3316   | iutA      | CDS  |
| clone D | 3324467      | 3461493      | s                          | rec    | i02_3316   | iutA      | CDS  |



| Lineage | Clone D site | CFT 073 site | mutation type <sup>a</sup> | recomb | Gene     | Gene name | Type |
|---------|--------------|--------------|----------------------------|--------|----------|-----------|------|
| clone D | 3324479      | 3461505      | s                          | rec    | i02_3316 | iutA      | CDS  |
| clone D | 3324485      | 3461511      | s                          | rec    | i02_3316 | iutA      | CDS  |
| clone D | 3324490      | 3461516      | ns                         | rec    | i02_3316 | iutA      | CDS  |
| clone D | 3324492      | 3461518      | ns                         | rec    | i02_3316 | iutA      | CDS  |
| clone D | 3324493      | 3461519      | ns                         | rec    | i02_3316 | iutA      | CDS  |
| clone D | 3324500      | 3461526      | s                          | rec    | i02_3316 | iutA      | CDS  |
| clone D | 3324503      | 3461529      | s                          | rec    | i02_3316 | iutA      | CDS  |
| clone D | 3324509      | 3461535      | s                          | rec    | i02_3316 | iutA      | CDS  |
| clone D | 3324515      | 3461541      | ns                         | rec    | i02_3316 | iutA      | CDS  |
| clone D | 3324516      | 3461542      | ns                         | rec    | i02_3316 | iutA      | CDS  |
| clone D | 3324517      | 3461543      | ns                         | rec    | i02_3316 | iutA      | CDS  |
| clone D | 3324536      | 3461562      | s                          | rec    | i02_3316 | iutA      | CDS  |
| clone D | 3324548      | 3461574      | s                          | rec    | i02_3316 | iutA      | CDS  |
| clone D | 3324560      | 3461586      | s                          | rec    | i02_3316 | iutA      | CDS  |
| clone D | 3324581      | 3461607      | s                          | rec    | i02_3316 | iutA      | CDS  |
| clone D | 3324584      | 3461610      | s                          | rec    | i02_3316 | iutA      | CDS  |
| clone D | 3324626      | 3461652      | ns                         | rec    | i02_3316 | iutA      | CDS  |
| clone D | 3324627      | 3461653      | ns                         | rec    | i02_3316 | iutA      | CDS  |
| clone D | 3324636      | 3461662      | ns                         | rec    | i02_3316 | iutA      | CDS  |
| clone D | 3324637      | 3461663      | ns                         | rec    | i02_3316 | iutA      | CDS  |
| clone D | 3324641      | 3461667      | s                          | rec    | i02_3316 | iutA      | CDS  |
| clone D | 3324663      | 3461689      | ns                         | rec    | i02_3316 | iutA      | CDS  |
| clone D | 3324664      | 3461690      | ns                         | rec    | i02_3316 | iutA      | CDS  |
| clone D | 3324665      | 3461691      | ns                         | rec    | i02_3316 | iutA      | CDS  |
| clone D | 3324666      | 3461692      | ns                         | rec    | i02_3316 | iutA      | CDS  |
| clone D | 3324679      | 3461705      | ns                         | rec    | i02_3316 | iutA      | CDS  |
| clone D | 3324680      | 3461706      | s                          | rec    | i02_3316 | iutA      | CDS  |
| clone D | 3324685      | 3461711      | ns                         | rec    | i02_3316 | iutA      | CDS  |
| clone D | 3324689      | 3461715      | s                          | rec    | i02_3316 | iutA      | CDS  |
| clone D | 3324692      | 3461718      | s                          | rec    | i02_3316 | iutA      | CDS  |
| clone D | 3324695      | 3461721      | s                          | rec    | i02_3316 | iutA      | CDS  |
| clone D | 3324707      | 3461733      | s                          | rec    | i02_3316 | iutA      | CDS  |
| clone D | 3324710      | 3461736      | s                          | rec    | i02_3316 | iutA      | CDS  |
| clone D | 3324716      | 3461742      | s                          | rec    | i02_3316 | iutA      | CDS  |
| clone D | 3324719      | 3461745      | ns                         | rec    | i02_3316 | iutA      | CDS  |
| clone D | 3324721      | 3461747      | ns                         | rec    | i02_3316 | iutA      | CDS  |
| clone D | 3324722      | 3461748      | s                          | rec    | i02_3316 | iutA      | CDS  |
| clone D | 3324725      | 3461751      | s                          | rec    | i02_3316 | iutA      | CDS  |
| clone D | 3324743      | 3461769      | s                          | rec    | i02_3316 | iutA      | CDS  |
| clone D | 3324776      | 3461802      | s                          | rec    | i02_3316 | iutA      | CDS  |
| clone D | 3324794      | 3461820      | s                          | rec    | i02_3316 | iutA      | CDS  |
| clone D | 3324803      | 3461829      | s                          | rec    | i02_3316 | iutA      | CDS  |
| clone D | 3324806      | 3461832      | s                          | rec    | i02_3316 | iutA      | CDS  |
| clone D | 3324827      | 3461853      | s                          | rec    | i02_3316 | iutA      | CDS  |
| clone D | 3324851      | 3461877      | s                          | rec    | i02_3316 | iutA      | CDS  |
| clone D | 3324857      | 3461883      | s                          | rec    | i02_3316 | iutA      | CDS  |
| clone D | 3324863      | 3461889      | s                          | rec    | i02_3316 | iutA      | CDS  |
| clone D | 3324871      | 3461897      | s                          | rec    | i02_3316 | iutA      | CDS  |
| clone D | 3324872      | 3461898      | ns                         | rec    | i02_3316 | iutA      | CDS  |
| clone D | 3324873      | 3461899      | ns                         | rec    | i02_3316 | iutA      | CDS  |
| clone D | 3324878      | 3461904      | s                          | rec    | i02_3316 | iutA      | CDS  |

| Lineage | Clone D site | CFT 073 site | mutation type <sup>a</sup> | recomb | Gene     | Gene name | Type |
|---------|--------------|--------------|----------------------------|--------|----------|-----------|------|
| clone D | 3324887      | 3461913      | s                          | rec    | i02_3316 | iutA      | CDS  |
| clone D | 3324890      | 3461916      | s                          | rec    | i02_3316 | iutA      | CDS  |
| clone D | 3324895      | 3461921      | ns                         | rec    | i02_3316 | iutA      | CDS  |
| clone D | 3324908      | 3461934      | s                          | rec    | i02_3316 | iutA      | CDS  |
| clone D | 3324935      | 3461961      | s                          | rec    | i02_3316 | iutA      | CDS  |
| clone D | 3324938      | 3461964      | s                          | rec    | i02_3316 | iutA      | CDS  |
| clone D | 3324947      | 3461973      | s                          | rec    | i02_3316 | iutA      | CDS  |
| clone D | 3324953      | 3461979      | s                          | rec    | i02_3316 | iutA      | CDS  |
| clone D | 3324962      | 3461988      | s                          | rec    | i02_3316 | iutA      | CDS  |
| clone D | 3324965      | 3461991      | s                          | rec    | i02_3316 | iutA      | CDS  |
| clone D | 3324968      | 3461994      | s                          | rec    | i02_3316 | iutA      | CDS  |
| clone D | 3324971      | 3461997      | s                          | rec    | i02_3316 | iutA      | CDS  |
| clone D | 3324989      | 3462015      | s                          | rec    | i02_3316 | iutA      | CDS  |
| clone D | 3324993      | 3462019      | ns                         | rec    | i02_3316 | iutA      | CDS  |
| clone D | 3324995      | 3462021      | s                          | rec    | i02_3316 | iutA      | CDS  |
| clone D | 3325007      | 3462033      | s                          | rec    | i02_3316 | iutA      | CDS  |
| clone D | 3325015      | 3462041      | ns                         | rec    | i02_3316 | iutA      | CDS  |
| clone D | 3325017      | 3462043      | ns                         | rec    | i02_3316 | iutA      | CDS  |
| clone D | 3325027      | 3462053      | ns                         | rec    | i02_3316 | iutA      | CDS  |
| clone D | 3325032      | 3462058      | ns                         | rec    | i02_3316 | iutA      | CDS  |
| clone D | 3325046      | 3462072      | ns                         | rec    | i02_3316 | iutA      | CDS  |
| clone D | 3325048      | 3462074      | ns                         | rec    | i02_3316 | iutA      | CDS  |
| clone D | 3325050      | 3462076      | ns                         | rec    | i02_3316 | iutA      | CDS  |
| clone D | 3325055      | 3462081      | s                          | rec    | i02_3316 | iutA      | CDS  |
| clone D | 3325061      | 3462087      | s                          | rec    | i02_3316 | iutA      | CDS  |
| clone D | 3325083      | 3462109      | ns                         | rec    | i02_3316 | iutA      | CDS  |
| clone D | 3325085      | 3462111      | ns                         | rec    | i02_3316 | iutA      | CDS  |
| clone D | 3325087      | 3462113      | ns                         | rec    | i02_3316 | iutA      | CDS  |
| clone D | 3325094      | 3462120      | ns                         | rec    | i02_3316 | iutA      | CDS  |
| clone D | 3325096      | 3462122      | ns                         | rec    | i02_3316 | iutA      | CDS  |
| clone D | 3325099      | 3462125      | ns                         | rec    | i02_3316 | iutA      | CDS  |
| clone D | 3325103      | 3462129      | s                          | rec    | i02_3316 | iutA      | CDS  |
| clone D | 3325113      | 3462139      | ns                         | rec    | i02_3316 | iutA      | CDS  |
| clone D | 3325114      | 3462140      | ns                         | rec    | i02_3316 | iutA      | CDS  |
| clone D | 3325115      | 3462141      | s                          | rec    | i02_3316 | iutA      | CDS  |
| clone D | 3325136      | 3462162      | s                          | rec    | i02_3316 | iutA      | CDS  |
| clone D | 3325151      | 3462177      | s                          | rec    | i02_3316 | iutA      | CDS  |
| clone D | 3325181      | 3462207      | ns                         | rec    | i02_3316 | iutA      | CDS  |
| clone D | 3325183      | 3462209      | ns                         | rec    | i02_3316 | iutA      | CDS  |
| clone D | 3325205      | 3462231      | s                          | rec    | i02_3316 | iutA      | CDS  |
| clone D | 3325220      | 3462246      | s                          | rec    | i02_3316 | iutA      | CDS  |
| clone D | 3325256      | 3462282      | ns                         | rec    | i02_3316 | iutA      | CDS  |
| CFT073  | 3325295      | 3462321      | ns                         | rec    | i02_3316 | iutA      | CDS  |
| clone D | 3325296      | 3462322      | ns                         | rec    | i02_3316 | iutA      | CDS  |
| clone D | 3325300      | 3462326      | ns                         | rec    | i02_3316 | iutA      | CDS  |
| clone D | 3325337      | 3462363      | s                          | rec    | i02_3316 | iutA      | CDS  |
| clone D | 3325352      | 3462378      | s                          | rec    | i02_3316 | iutA      | CDS  |
| clone D | 3325365      | 3462391      | ns                         | rec    | i02_3316 | iutA      | CDS  |
| clone D | 3325373      | 3462399      | s                          | rec    | i02_3316 | iutA      | CDS  |
| clone D | 3325403      | 3462429      | s                          | rec    | i02_3316 | iutA      | CDS  |
| clone D | 3325442      | 3462468      | s                          | rec    | i02_3316 | iutA      | CDS  |

| Lineage | Clone D site | CFT 073 site | mutation type <sup>a</sup> | recomb | Gene     | Gene name | Type |
|---------|--------------|--------------|----------------------------|--------|----------|-----------|------|
| CFT073  | 3325450      | 3462476      | ns                         | rec    | i02_3316 | iutA      | CDS  |
| clone D | 3325454      | 3462480      | s                          | rec    | i02_3316 | iutA      | CDS  |
| clone D | 3325458      | 3462484      | ns                         | rec    | i02_3316 | iutA      | CDS  |
| clone D | 3325460      | 3462486      | s                          | rec    | i02_3316 | iutA      | CDS  |
| clone D | 3325508      | 3462534      | s                          | rec    | i02_3316 | iutA      | CDS  |
| clone D | 3325514      | 3462540      | s                          | rec    | i02_3316 | iutA      | CDS  |
| clone D | 3325526      | 3462552      | ns                         | rec    | i02_3316 | iutA      | CDS  |
| clone D | 3325536      | 3462562      | ns                         | rec    | i02_3316 | iutA      | CDS  |
| clone D | 3325541      | 3462567      | s                          | rec    | i02_3316 | iutA      | CDS  |
| clone D | 3325548      | 3462574      | ns                         | rec    | i02_3316 | iutA      | CDS  |
| clone D | 3325553      | 3462579      | ns                         | rec    | i02_3316 | iutA      | CDS  |
| clone D | 3325562      | 3462588      | s                          | rec    | i02_3316 | iutA      | CDS  |
| clone D | 3325565      | 3462591      | s                          | rec    | i02_3316 | iutA      | CDS  |
| clone D | 3325594      | 3462620      | ns                         | rec    | i02_3316 | iutA      | CDS  |
| ?       | 3325601      | 3462627      | s                          | rec    | i02_3316 | iutA      | CDS  |
| clone D | 3325607      | 3462633      | s                          | rec    | i02_3316 | iutA      | CDS  |
| clone D | 3325622      | 3462648      | s                          | rec    | i02_3316 | iutA      | CDS  |
| clone D | 3325625      | 3462651      | s                          | rec    | i02_3316 | iutA      | CDS  |
| clone D | 3325630      | 3462656      | s                          | rec    | i02_3316 | iutA      | CDS  |
| clone D | 3325631      | 3462657      | s                          | rec    | i02_3316 | iutA      | CDS  |
| clone D | 3325667      | 3462693      | s                          | rec    | i02_3316 | iutA      | CDS  |
| clone D | 3325690      | 3462716      | ns                         | rec    | i02_3316 | iutA      | CDS  |
| clone D | 3325696      | 3462722      | ns                         | rec    | i02_3316 | iutA      | CDS  |
| clone D | 3325726      | 3462752      | s                          | rec    | i02_3316 | iutA      | CDS  |
| clone D | 3325799      | 3462825      | ns                         | rec    | i02_3316 | iutA      | CDS  |
| clone D | 3325820      | 3462846      | s                          | rec    | i02_3316 | iutA      | CDS  |
| clone D | 3325832      | 3462858      | s                          | rec    | i02_3316 | iutA      | CDS  |
| clone D | 3325854      | 3462880      | ns                         | rec    | i02_3316 | iutA      | CDS  |
| clone D | 3325868      | 3462894      | s                          | rec    | i02_3316 | iutA      | CDS  |
| clone D | 3325930      | 3462956      | s                          | rec    | i02_3316 | iutA      | CDS  |
| clone D | 3325931      | 3462957      | s                          | rec    | i02_3316 | iutA      | CDS  |
| clone D | 3325934      | 3462960      | s                          | rec    | i02_3316 | iutA      | CDS  |
| clone D | 3325943      | 3462969      | s                          | rec    | i02_3316 | iutA      | CDS  |
| clone D | 3325949      | 3462975      | s                          | rec    | i02_3316 | iutA      | CDS  |
| clone D | 3325960      | 3462986      | ns                         | rec    | i02_3316 | iutA      | CDS  |
| clone D | 3325967      | 3462993      | s                          | rec    | i02_3316 | iutA      | CDS  |
| clone D | 3326006      | 3463032      | ns                         | rec    | i02_3316 | iutA      | CDS  |
| clone D | 3326008      | 3463034      | ns                         | rec    | i02_3316 | iutA      | CDS  |
| clone D | 3326032      | 3463058      | ns                         | rec    | i02_3316 | iutA      | CDS  |
| clone D | 3326048      | 3463074      | s                          | rec    | i02_3316 | iutA      | CDS  |
| clone D | 3326054      | 3463080      | s                          | rec    | i02_3316 | iutA      | CDS  |
| clone D | 3326062      | 3463088      | ns                         | rec    | i02_3316 | iutA      | CDS  |
| clone D | 3326066      | 3463092      | s                          | rec    | i02_3316 | iutA      | CDS  |
| clone D | 3326069      | 3463095      | s                          | rec    | i02_3316 | iutA      | CDS  |
| clone D | 3326089      | 3463115      | ns                         | rec    | i02_3316 | iutA      | CDS  |
| clone D | 3326090      | 3463116      | s                          | rec    | i02_3316 | iutA      | CDS  |
| clone D | 3326108      | 3463134      | s                          | rec    | i02_3316 | iutA      | CDS  |
| clone D | 3326115      | 3463141      | ns                         | rec    | i02_3316 | iutA      | CDS  |
| clone D | 3326126      | 3463152      | s                          | rec    | i02_3316 | iutA      | CDS  |
| clone D | 3326135      | 3463161      | s                          | rec    | i02_3316 | iutA      | CDS  |
| clone D | 3326141      | 3463167      | s                          | rec    | i02_3316 | iutA      | CDS  |

| Lineage | Clone D site | CFT 073 site | mutation type <sup>a</sup> | recomb | Gene       | Gene name | Type |
|---------|--------------|--------------|----------------------------|--------|------------|-----------|------|
| clone D | 3326143      | 3463169      | s                          | rec    | i02_3316   | iutA      | CDS  |
| clone D | 3326162      | 3463188      | s                          | rec    | i02_3316   | iutA      | CDS  |
| clone D | 3326171      | 3463197      | s                          | rec    | i02_3316   | iutA      | CDS  |
| clone D | 3326189      | 3463215      | s                          | rec    | i02_3316   | iutA      | CDS  |
| clone D | 3326201      | 3463227      | s                          | rec    | i02_3316   | iutA      | CDS  |
| clone D | 3326240      | 3463266      | s                          | rec    | i02_3316   | iutA      | CDS  |
| clone D | 3326243      | 3463269      | s                          | rec    | i02_3316   | iutA      | CDS  |
| clone D | 3326256      | 3463282      | ns                         | rec    | i02_3316   | iutA      | CDS  |
| clone D | 3326267      | 3463293      | ns                         | rec    | i02_3316   | iutA      | CDS  |
| clone D | 3326269      | 3463295      | ns                         | rec    | i02_3316   | iutA      | CDS  |
| clone D | 3326272      | 3463298      | ns                         | rec    | i02_3316   | iutA      | CDS  |
| clone D | 3326274      | 3463300      | ns                         | rec    | i02_3316   | iutA      | CDS  |
| clone D | 3326275      | 3463301      | ns                         | rec    | i02_3316   | iutA      | CDS  |
| clone D | 3326276      | 3463302      | ns                         | rec    | i02_3316   | iutA      | CDS  |
| clone D | 3326278      | 3463304      | ns                         | rec    | i02_3316   | iutA      | CDS  |
| clone D | 3326286      | 3463312      | ns                         | rec    | i02_3316   | iutA      | CDS  |
| clone D | 3326291      | 3463317      | s                          | rec    | i02_3316   | iutA      | CDS  |
| clone D | 3326294      | 3463320      | s                          | rec    | i02_3316   | iutA      | CDS  |
| clone D | 3326300      | 3463326      | s                          | rec    | i02_3316   | iutA      | CDS  |
| clone D | 3326306      | 3463332      | ns                         | rec    | i02_3316   | iutA      | CDS  |
| clone D | 3326308      | 3463334      | ns                         | rec    | i02_3316   | iutA      | CDS  |
| clone D | 3326311      | 3463337      | ns                         | rec    | i02_3316   | iutA      | CDS  |
| clone D | 3326314      | 3463340      | ns                         | rec    | i02_3316   | iutA      | CDS  |
| clone D | 3326316      | 3463342      | ns                         | rec    | i02_3316   | iutA      | CDS  |
| clone D | 3326317      | 3463343      | ns                         | rec    | i02_3316   | iutA      | CDS  |
| clone D | 3326327      | 3463353      | s                          | rec    | i02_3316   | iutA      | CDS  |
| clone D | 3326330      | 3463356      | ns                         | rec    | i02_3316   | iutA      | CDS  |
| clone D | 3326331      | 3463357      | ns                         | rec    | i02_3316   | iutA      | CDS  |
| clone D | 3326332      | 3463358      | ns                         | rec    | i02_3316   | iutA      | CDS  |
| clone D | 3326333      | 3463359      | s                          | rec    | i02_3316   | iutA      | CDS  |
| clone D | 3326341      | 3463367      | ns                         | rec    | i02_3316   | iutA      | CDS  |
| clone D | 3326342      | 3463368      | ns                         | rec    | i02_3316   | iutA      | CDS  |
| clone D | 3326343      | 3463369      | ns                         | rec    | i02_3316   | iutA      | CDS  |
| clone D | 3326346      | 3463372      | ns                         | rec    | i02_3316   | iutA      | CDS  |
| clone D | 3326359      | 3463385      | ns                         | rec    | i02_3316   | iutA      | CDS  |
| clone D | 3326360      | 3463386      | ns                         | rec    | i02_3316   | iutA      | CDS  |
| clone D | 3326367      | 3463393      | ns                         | rec    | i02_3316   | iutA      | CDS  |
| clone D | 3326376      | 3463402      | ns                         | rec    | i02_3316   | iutA      | CDS  |
| clone D | 3326377      | 3463403      | ns                         | rec    | i02_3316   | iutA      | CDS  |
| clone D | 3326381      | 3463407      | s                          | rec    | i02_3316   | iutA      | CDS  |
| clone D | 3326382      | 3463408      | s                          | rec    | i02_3316   | iutA      | CDS  |
| CFT073  | 3326408      | 3463411      | nc                         | rec    | intergenic |           |      |
| clone D | 3326412      | 3463415      | nc                         | rec    | intergenic |           |      |
| clone D | 3326416      | 3463419      | nc                         | rec    | intergenic |           |      |
| CFT073  | 3326426      | 3463429      | nc                         | rec    | intergenic |           |      |
| clone D | 3326444      | 3463447      | nc                         | rec    | intergenic |           |      |
| clone D | 3326448      | 3463452      | nc                         | rec    | intergenic |           |      |
| clone D | 3326449      | 3463453      | nc                         | rec    | intergenic |           |      |
| clone D | 3326451      | 3463455      | ns                         | rec    | i02_3317   | iucD      | CDS  |
| clone D | 3326452      | 3463456      | ns                         | rec    | i02_3317   | iucD      | CDS  |
| clone D | 3326454      | 3463458      | ns                         | rec    | i02_3317   | iucD      | CDS  |

| Lineage | Clone D site | CFT 073 site | mutation type <sup>a</sup> | recomb | Gene     | Gene name | Type |
|---------|--------------|--------------|----------------------------|--------|----------|-----------|------|
| clone D | 3326477      | 3463481      | s                          | rec    | i02_3317 | iucD      | CDS  |
| clone D | 3326510      | 3463514      | s                          | rec    | i02_3317 | iucD      | CDS  |
| clone D | 3326515      | 3463519      | ns                         | rec    | i02_3317 | iucD      | CDS  |
| clone D | 3326546      | 3463550      | s                          | rec    | i02_3317 | iucD      | CDS  |
| clone D | 3326582      | 3463586      | s                          | rec    | i02_3317 | iucD      | CDS  |
| clone D | 3326591      | 3463595      | s                          | rec    | i02_3317 | iucD      | CDS  |
| clone D | 3326604      | 3463608      | ns                         | rec    | i02_3317 | iucD      | CDS  |
| clone D | 3326606      | 3463610      | s                          | rec    | i02_3317 | iucD      | CDS  |
| clone D | 3326615      | 3463619      | s                          | rec    | i02_3317 | iucD      | CDS  |
| clone D | 3326618      | 3463622      | s                          | rec    | i02_3317 | iucD      | CDS  |
| clone D | 3326692      | 3463696      | s                          | rec    | i02_3317 | iucD      | CDS  |
| clone D | 3326723      | 3463727      | s                          | rec    | i02_3317 | iucD      | CDS  |
| clone D | 3326774      | 3463778      | s                          | rec    | i02_3317 | iucD      | CDS  |
| CFT073  | 3326781      | 3463785      | ns                         | rec    | i02_3317 | iucD      | CDS  |
| clone D | 3326795      | 3463799      | s                          | rec    | i02_3317 | iucD      | CDS  |
| clone D | 3326803      | 3463807      | s                          | rec    | i02_3317 | iucD      | CDS  |
| clone D | 3326804      | 3463808      | s                          | rec    | i02_3317 | iucD      | CDS  |
| clone D | 3326816      | 3463820      | s                          | rec    | i02_3317 | iucD      | CDS  |
| clone D | 3326995      | 3463999      | ns                         | rec    | i02_3317 | iucD      | CDS  |
| clone D | 3327083      | 3464087      | s                          | rec    | i02_3317 | iucD      | CDS  |
| CFT073  | 3327173      | 3464177      | s                          | rec    | i02_3317 | iucD      | CDS  |
| clone D | 3327191      | 3464195      | s                          | rec    | i02_3317 | iucD      | CDS  |
| clone D | 3327244      | 3464248      | ns                         | rec    | i02_3317 | iucD      | CDS  |
| clone D | 3327318      | 3464322      | ns                         | rec    | i02_3317 | iucD      | CDS  |
| clone D | 3327320      | 3464324      | s                          | rec    | i02_3317 | iucD      | CDS  |
| clone D | 3327326      | 3464330      | s                          | rec    | i02_3317 | iucD      | CDS  |
| clone D | 3327329      | 3464333      | s                          | rec    | i02_3317 | iucD      | CDS  |
| clone D | 3327346      | 3464350      | ns                         | rec    | i02_3317 | iucD      | CDS  |
| clone D | 3327353      | 3464357      | s                          | rec    | i02_3317 | iucD      | CDS  |
| clone D | 3327365      | 3464369      | s                          | rec    | i02_3317 | iucD      | CDS  |
| clone D | 3327422      | 3464426      | s                          | rec    | i02_3317 | iucD      | CDS  |
| clone D | 3327512      | 3464516      | s                          | rec    | i02_3317 | iucD      | CDS  |
| clone D | 3327536      | 3464540      | s                          | rec    | i02_3317 | iucD      | CDS  |
| CFT073  | 3327563      | 3464567      | s                          | rec    | i02_3317 | iucD      | CDS  |
| clone D | 3327623      | 3464627      | s                          | rec    | i02_3317 | iucD      | CDS  |
| clone D | 3327640      | 3464644      | ns                         | rec    | i02_3317 | iucD      | CDS  |
| clone D | 3327665      | 3464669      | s                          | rec    | i02_3317 | iucD      | CDS  |
| CFT073  | 3327674      | 3464678      | s                          | rec    | i02_3317 | iucD      | CDS  |
| clone D | 3327698      | 3464702      | s                          | rec    | i02_3317 | iucD      | CDS  |
| clone D | 3327771      | 3464775      | ns                         | rec    | i02_3318 | iucC      | CDS  |
| clone D | 3327796      | 3464800      | s                          | rec    | i02_3318 | iucC      | CDS  |
| CFT073  | 3327809      | 3464813      | ns                         | rec    | i02_3318 | iucC      | CDS  |
| clone D | 3327811      | 3464815      | s                          | rec    | i02_3318 | iucC      | CDS  |
| clone D | 3327814      | 3464818      | s                          | rec    | i02_3318 | iucC      | CDS  |
| clone D | 3327868      | 3464872      | s                          | rec    | i02_3318 | iucC      | CDS  |
| clone D | 3327910      | 3464914      | ns                         | rec    | i02_3318 | iucC      | CDS  |
| clone D | 3328057      | 3465061      | s                          | rec    | i02_3318 | iucC      | CDS  |
| clone D | 3328066      | 3465070      | s                          | rec    | i02_3318 | iucC      | CDS  |
| clone D | 3328075      | 3465079      | s                          | rec    | i02_3318 | iucC      | CDS  |
| clone D | 3328105      | 3465109      | s                          | rec    | i02_3318 | iucC      | CDS  |
| clone D | 3328109      | 3465113      | ns                         | rec    | i02_3318 | iucC      | CDS  |

| Lineage | Clone D site | CFT 073 site | mutation type <sup>a</sup> | recomb | Gene       | Gene name | Type |
|---------|--------------|--------------|----------------------------|--------|------------|-----------|------|
| clone D | 3328123      | 3465127      | s                          | rec    | i02_3318   | iucC      | CDS  |
| clone D | 3328165      | 3465169      | s                          | rec    | i02_3318   | iucC      | CDS  |
| clone D | 3328186      | 3465190      | s                          | rec    | i02_3318   | iucC      | CDS  |
| clone D | 3328201      | 3465205      | s                          | rec    | i02_3318   | iucC      | CDS  |
| clone D | 3328246      | 3465250      | s                          | rec    | i02_3318   | iucC      | CDS  |
| clone D | 3328255      | 3465259      | s                          | rec    | i02_3318   | iucC      | CDS  |
| clone D | 3328269      | 3465273      | s                          | rec    | i02_3318   | iucC      | CDS  |
| clone D | 3328297      | 3465301      | s                          | rec    | i02_3318   | iucC      | CDS  |
| clone D | 3328309      | 3465313      | s                          | rec    | i02_3318   | iucC      | CDS  |
| clone D | 3328483      | 3465487      | s                          | rec    | i02_3318   | iucC      | CDS  |
| clone D | 3328510      | 3465514      | s                          | rec    | i02_3318   | iucC      | CDS  |
| clone D | 3328531      | 3465535      | s                          | rec    | i02_3318   | iucC      | CDS  |
| clone D | 3328561      | 3465565      | s                          | rec    | i02_3318   | iucC      | CDS  |
| clone D | 3328594      | 3465598      | s                          | rec    | i02_3318   | iucC      | CDS  |
| clone D | 3328663      | 3465667      | s                          | rec    | i02_3318   | iucC      | CDS  |
| clone D | 3328672      | 3465676      | s                          | rec    | i02_3318   | iucC      | CDS  |
| clone D | 3328777      | 3465781      | s                          | rec    | i02_3318   | iucC      | CDS  |
| clone D | 3328837      | 3465841      | s                          | rec    | i02_3318   | iucC      | CDS  |
| CFT073  | 3328924      | 3465928      | s                          | rec    | i02_3318   | iucC      | CDS  |
| CFT073  | 3328986      | 3465990      | ns                         | rec    | i02_3318   | iucC      | CDS  |
| CFT073  | 3329323      | 3466327      | s                          | rec    | i02_3318   | iucC      | CDS  |
| clone D | 3329590      | 3466594      | ns                         | rec    | i02_3319   | iucB      | CDS  |
| CFT073  | 3329793      | 3466797      | s                          | rec    | i02_3319   | iucB      | CDS  |
| CFT073  | 3330006      | 3467010      | s                          | rec    | i02_3319   | iucB      | CDS  |
| CFT073  | 3330033      | 3467037      | s                          | rec    | i02_3319   | iucB      | CDS  |
| CFT073  | 3330144      | 3467148      | s                          | rec    | i02_3319   | iucB      | CDS  |
| CFT073  | 3330206      | 3467210      | ns                         | rec    | i02_3319   | iucB      | CDS  |
| clone D | 3330246      | 3467250      | s                          | rec    | i02_3319   | iucB      | CDS  |
| CFT073  | 3331062      | 3468066      | s                          | rec    | i02_3320   | iucA      | CDS  |
| clone D | 3331144      | 3468148      | ns                         | rec    | i02_3320   | iucA      | CDS  |
| CFT073  | 3331725      | 3468729      | s                          | rec    | i02_3320   | iucA      | CDS  |
| CFT073  | 3331755      | 3468759      | s                          | rec    | i02_3320   | iucA      | CDS  |
| CFT073  | 3331760      | 3468764      | ns                         | rec    | i02_3320   | iucA      | CDS  |
| CFT073  | 3331798      | 3468802      | ns                         | rec    | i02_3320   | iucA      | CDS  |
| CFT073  | 3331800      | 3468804      | s                          | rec    | i02_3320   | iucA      | CDS  |
| CFT073  | 3331863      | 3468867      | s                          | rec    | i02_3320   | iucA      | CDS  |
| CFT073  | 3332024      | 3469028      | ns                         | rec    | i02_3320   | iucA      | CDS  |
| clone D | 3332160      | 3469164      | nc                         | rec    | intergenic |           |      |
| CFT073  | 3332205      | 3469209      | nc                         | rec    | intergenic |           |      |
| CFT073  | 3332272      | 3469276      | nc                         | rec    | intergenic |           |      |
| CFT073  | 3332282      | 3469286      | s                          | rec    | i02_3321   | shiF      | CDS  |
| CFT073  | 3332357      | 3469361      | s                          | rec    | i02_3321   | shiF      | CDS  |
| clone D | 3332474      | 3469478      | ns                         | rec    | i02_3321   | shiF      | CDS  |
| CFT073  | 3332699      | 3469703      | s                          | rec    | i02_3322   | /         | CDS  |
| CFT073  | 3332899      | 3469903      | ns                         | rec    | i02_3321   | shiF      | CDS  |
| clone D | 3333533      | 3470537      | nc                         | rec    | intergenic |           |      |
| CFT073  | 3334960      | 3470630      | s                          | rec    | i02_3325   | /         | CDS  |
| CFT073  | 3336081      | 3471750      | s                          | rec    | i02_3326   | /         | CDS  |
| CFT073  | 3336087      | 3471756      | ns                         | rec    | i02_3326   | /         | CDS  |
| CFT073  | 3336088      | 3471757      | ns                         | rec    | i02_3326   | /         | CDS  |
| CFT073  | 3336104      | 3471772      | ns                         | rec    | i02_3326   | /         | CDS  |

| Lineage | Clone D site | CFT 073 site | mutation type <sup>a</sup> | recomb | Gene       | Gene name | Type |
|---------|--------------|--------------|----------------------------|--------|------------|-----------|------|
| CFT073  | 3336174      | 3471837      | s                          | rec    | i02_3326   | /         | CDS  |
| CFT073  | 3336256      | 3471916      | ns                         | rec    | i02_3326   | /         | CDS  |
| CFT073  | 3336258      | 3471918      | s                          | rec    | i02_3326   | /         | CDS  |
| CFT073  | 3336287      | 3471947      | s                          | rec    | i02_3326   | /         | CDS  |
| clone D | 3336875      | 3472534      | ns                         | rec    | i02_3328   | /         | CDS  |
| CFT073  | 3336945      | 3472604      | s                          | rec    | i02_3328   | /         | CDS  |
| CFT073  | 3337166      | 3472825      | s                          | rec    | i02_3328   | /         | CDS  |
| CFT073  | 3337243      | 3472903      | ns                         | rec    | i02_3328   | /         | CDS  |
| CFT073  | 3337245      | 3472905      | ns                         | rec    | i02_3328   | /         | CDS  |
| clone D | 3337247      | 3472908      | ns                         | rec    | i02_3328   | /         | CDS  |
| CFT073  | 3338056      | 3473718      | s                          | rec    | i02_3329   | /         | CDS  |
| CFT073  | 3338618      | 3474280      | ns                         | rec    | i02_3329   | /         | CDS  |
| clone D | 3338773      | 3474435      | s                          | rec    | i02_3329   | /         | CDS  |
| CFT073  | 3339684      | 3475346      | ns                         | rec    | i02_3331   | /         | CDS  |
| CFT073  | 3340438      | 3476100      | s                          | rec    | i02_3331   | /         | CDS  |
| CFT073  | 3343615      | 3479277      | s                          | rec    | i02_3334   | /         | CDS  |
| clone D | 3344306      | 3479969      | nc                         | rec    | intergenic |           |      |
| ?       | 3344309      | 3479974      | nc                         | rec    | intergenic |           |      |
| CFT073  | 3344315      | 3479980      | nc                         | rec    | intergenic |           |      |
| CFT073  | 3344334      | 3479999      | nc                         | rec    | intergenic |           |      |
| CFT073  | 3344336      | 3480001      | nc                         | rec    | intergenic |           |      |
| clone D | 3344352      | 3480019      | nc                         | rec    | intergenic |           |      |
| CFT073  | 3344358      | 3480025      | nc                         | rec    | intergenic |           |      |
| CFT073  | 3344369      | 3480037      | nc                         | rec    | intergenic |           |      |
| CFT073  | 3344375      | 3480043      | nc                         | rec    | intergenic |           |      |
| CFT073  | 3344384      | 3480053      | nc                         | rec    | intergenic |           |      |
| CFT073  | 3344389      | 3480058      | nc                         | rec    | intergenic |           |      |
| CFT073  | 3344401      | 3480070      | nc                         | rec    | intergenic |           |      |
| clone D | 3346076      | 3481745      | s                          | rec    | i02_3337   | /         | CDS  |
| CFT073  | 3346180      | 3481849      | ns                         | rec    | i02_3337   | /         | CDS  |
| clone D | 3347981      | 3483650      | ns                         | rec    | i02_3339   | /         | CDS  |
| CFT073  | 3348195      | 3483863      | ns                         | rec    | i02_3340   | /         | CDS  |
| ?       | 3348207      | 3483875      | s                          | rec    | i02_3340   | /         | CDS  |
| clone D | 3348420      | 3484088      | s                          | rec    | i02_3340   | /         | CDS  |
| ?       | 3348426      | 3484094      | s                          | rec    | i02_3340   | /         | CDS  |
| CFT073  | 3348434      | 3484102      | ns                         | rec    | i02_3340   | /         | CDS  |
| CFT073  | 3348435      | 3484103      | s                          | rec    | i02_3340   | /         | CDS  |
| ?       | 3348482      | 3484150      | ns                         | rec    | i02_3340   | /         | CDS  |
| clone D | 3348483      | 3484151      | s                          | rec    | i02_3340   | /         | CDS  |
| clone D | 3348492      | 3484160      | s                          | rec    | i02_3340   | /         | CDS  |
| clone D | 3348495      | 3484163      | s                          | rec    | i02_3340   | /         | CDS  |
| clone D | 3348498      | 3484166      | s                          | rec    | i02_3340   | /         | CDS  |
| ?       | 3348567      | 3484235      | ns                         | rec    | i02_3340   | /         | CDS  |
| ?       | 3348569      | 3484237      | ns                         | rec    | i02_3340   | /         | CDS  |
| CFT073  | 3348577      | 3484244      | nc                         | rec    | intergenic |           |      |
| clone D | 3348578      | 3484245      | nc                         | rec    | intergenic |           |      |
| clone D | 3348579      | 3484246      | nc                         | rec    | intergenic |           |      |
| clone D | 3348593      | 3484260      | nc                         | rec    | intergenic |           |      |
| clone D | 3348704      | 3484371      | nc                         | rec    | intergenic |           |      |
| clone D | 3348706      | 3484373      | nc                         | rec    | intergenic |           |      |
| CFT073  | 3349168      | 3484835      | ns                         | rec    | i02_3341   | /         | CDS  |

| Lineage | Clone D site | CFT 073 site | mutation type <sup>a</sup> | recomb | Gene       | Gene name | Type |
|---------|--------------|--------------|----------------------------|--------|------------|-----------|------|
| clone D | 3349227      | 3484894      | ns                         | rec    | i02_3341   | /         | CDS  |
| clone D | 3349507      | 3485174      | ns                         | rec    | i02_3342   | /         | CDS  |
| clone D | 3349575      | 3485242      | s                          | rec    | i02_3342   | /         | CDS  |
| clone D | 3349703      | 3485370      | nc                         | rec    | intergenic |           |      |
| CFT073  | 3349720      | 3485387      | nc                         | rec    | intergenic |           |      |
| clone D | 3349775      | 3485442      | nc                         | rec    | intergenic |           |      |
| CFT073  | 3349818      | 3485484      | nc                         | rec    | intergenic |           |      |
| CFT073  | 3350001      | 3485667      | nc                         | rec    | intergenic |           |      |
| CFT073  | 3350158      | 3485824      | ns                         | rec    | i02_3343   | /         | CDS  |
| CFT073  | 3350162      | 3485828      | ns                         | rec    | i02_3343   | /         | CDS  |
| clone D | 3350250      | 3485916      | s                          | rec    | i02_3343   | /         | CDS  |
| clone D | 3350282      | 3485948      | nc                         | rec    | intergenic |           |      |
| clone D | 3350288      | 3485954      | nc                         | rec    | intergenic |           |      |
| clone D | 3350326      | 3485992      | nc                         | rec    | intergenic |           |      |
| clone D | 3350438      | 3486104      | nc                         | rec    | intergenic |           |      |
| clone D | 3350453      | 3486119      | nc                         | rec    | intergenic |           |      |
| ?       | 3350750      | 3486411      | nc                         | rec    | intergenic |           |      |
| CFT073  | 3350803      | 3486478      | ns                         | rec    | i02_3344   | /         | CDS  |
| clone D | 3350826      | 3486501      | ns                         | rec    | i02_3344   | /         | CDS  |
| ?       | 3350834      | 3486516      | ns                         | rec    | i02_3344   | /         | CDS  |
| CFT073  | 3350835      | 3486517      | ns                         | rec    | i02_3344   | /         | CDS  |
| CFT073  | 3350879      | 3486561      | ns                         | rec    | i02_3344   | /         | CDS  |
| clone D | 3350953      | 3486629      | nc                         | rec    | intergenic |           |      |
| clone D | 3351038      | 3486714      | nc                         | rec    | intergenic |           |      |
| clone D | 3351058      | 3486734      | nc                         | rec    | intergenic |           |      |
| CFT073  | 3351122      | 3486798      | ns                         | rec    | i02_3345   | /         | CDS  |
| CFT073  | 3351129      | 3486805      | ns                         | rec    | i02_3345   | /         | CDS  |
| CFT073  | 3351130      | 3486806      | ns                         | rec    | i02_3345   | /         | CDS  |
| clone D | 3351170      | 3486846      | ns                         | rec    | i02_3345   | /         | CDS  |
| clone D | 3351184      | 3486860      | s                          | rec    | i02_3345   | /         | CDS  |
| CFT073  | 3351190      | 3486866      | s                          | rec    | i02_3345   | /         | CDS  |
| clone D | 3351205      | 3486881      | s                          | rec    | i02_3345   | /         | CDS  |
| CFT073  | 3351217      | 3486893      | s                          | rec    | i02_3345   | /         | CDS  |
| CFT073  | 3351225      | 3486901      | ns                         | rec    | i02_3345   | /         | CDS  |
| CFT073  | 3351232      | 3486908      | s                          | rec    | i02_3345   | /         | CDS  |
| clone D | 3351241      | 3486917      | s                          | rec    | i02_3345   | /         | CDS  |
| CFT073  | 3351253      | 3486929      | s                          | rec    | i02_3345   | /         | CDS  |
| clone D | 3351262      | 3486938      | s                          | rec    | i02_3345   | /         | CDS  |
| CFT073  | 3351265      | 3486941      | s                          | rec    | i02_3345   | /         | CDS  |
| CFT073  | 3351299      | 3486975      | s                          | rec    | i02_3345   | /         | CDS  |
| clone D | 3351307      | 3486983      | s                          | rec    | i02_3345   | /         | CDS  |
| clone D | 3351314      | 3486990      | ns                         | rec    | i02_3345   | /         | CDS  |
| CFT073  | 3352578      | 3488254      | s                          | rec    | i02_3347   | /         | CDS  |
| clone D | 3352725      | 3488401      | s                          | rec    | i02_3347   | /         | CDS  |
| clone D | 3353049      | 3488725      | s                          | rec    | i02_3347   | /         | CDS  |
| clone D | 3353055      | 3488731      | s                          | rec    | i02_3347   | /         | CDS  |
| clone D | 3353073      | 3488749      | ns                         | rec    | i02_3347   | /         | CDS  |
| clone D | 3353075      | 3488751      | ns                         | rec    | i02_3347   | /         | CDS  |
| clone D | 3353090      | 3488766      | ns                         | rec    | i02_3347   | /         | CDS  |
| clone D | 3353091      | 3488767      | s                          | rec    | i02_3347   | /         | CDS  |
| clone D | 3353100      | 3488776      | s                          | rec    | i02_3347   | /         | CDS  |



| Lineage | Clone D site | CFT 073 site | mutation type <sup>a</sup> | recomb | Gene       | Gene name | Type |
|---------|--------------|--------------|----------------------------|--------|------------|-----------|------|
| clone D | 3353103      | 3488779      | s                          | rec    | i02_3347   | /         | CDS  |
| clone D | 3353418      | 3489094      | s                          | rec    | i02_3347   | /         | CDS  |
| clone D | 3353746      | 3489422      | nc                         | rec    | intergenic |           |      |
| CFT073  | 3353788      | 3489464      | nc                         | rec    | intergenic |           |      |
| clone D | 3353789      | 3489465      | nc                         | rec    | intergenic |           |      |
| clone D | 3353799      | 3489475      | ns                         | rec    | i02_3348   | /         | CDS  |
| clone D | 3353940      | 3489616      | ns                         | rec    | i02_3348   | /         | CDS  |
| clone D | 3354454      | 3490130      | nc                         | rec    | intergenic |           |      |
| CFT073  | 3354823      | 3490499      | nc                         | rec    | intergenic |           |      |
| clone D | 3355836      | 3491512      | nc                         | rec    | intergenic |           |      |
| clone D | 3355840      | 3491516      | nc                         | rec    | intergenic |           |      |
| clone D | 3355899      | 3491575      | nc                         | rec    | intergenic |           |      |
| clone D | 3355920      | 3491596      | nc                         | rec    | intergenic |           |      |
| clone D | 3356251      | 3491927      | s                          | rec    | i02_3351   | /         | CDS  |
| CFT073  | 3356276      | 3491952      | ns                         | rec    | i02_3351   | /         | CDS  |
| clone D | 3356291      | 3491967      | ns                         | rec    | i02_3351   | /         | CDS  |
| clone D | 3356315      | 3491991      | ns                         | rec    | i02_3351   | /         | CDS  |
| clone D | 3356378      | 3492054      | ns                         | rec    | i02_3351   | /         | CDS  |
| CFT073  | 3357516      | 3493192      | ns                         | rec    | i02_3351   | /         | CDS  |
| ?       | 3357593      | 3493269      | ns                         | rec    | i02_3351   | /         | CDS  |
| CFT073  | 3357598      | 3493274      | s                          | rec    | i02_3351   | /         | CDS  |
| CFT073  | 3357772      | 3493448      | s                          | rec    | i02_3351   | /         | CDS  |
| CFT073  | 3357808      | 3493484      | s                          | rec    | i02_3351   | /         | CDS  |
| CFT073  | 3357811      | 3493487      | s                          | rec    | i02_3351   | /         | CDS  |
| CFT073  | 3357812      | 3493488      | ns                         | rec    | i02_3351   | /         | CDS  |
| CFT073  | 3357814      | 3493490      | ns                         | rec    | i02_3351   | /         | CDS  |
| CFT073  | 3357819      | 3493495      | ns                         | rec    | i02_3351   | /         | CDS  |
| CFT073  | 3357853      | 3493529      | s                          | rec    | i02_3351   | /         | CDS  |
| CFT073  | 3357905      | 3493581      | ns                         | rec    | i02_3351   | /         | CDS  |
| CFT073  | 3357907      | 3493583      | ns                         | rec    | i02_3351   | /         | CDS  |
| CFT073  | 3357918      | 3493594      | ns                         | rec    | i02_3351   | /         | CDS  |
| CFT073  | 3357919      | 3493595      | ns                         | rec    | i02_3351   | /         | CDS  |
| CFT073  | 3357922      | 3493598      | s                          | rec    | i02_3351   | /         | CDS  |
| CFT073  | 3357925      | 3493601      | s                          | rec    | i02_3351   | /         | CDS  |
| CFT073  | 3357929      | 3493605      | ns                         | rec    | i02_3351   | /         | CDS  |
| CFT073  | 3357931      | 3493607      | ns                         | rec    | i02_3351   | /         | CDS  |
| CFT073  | 3357938      | 3493614      | ns                         | rec    | i02_3351   | /         | CDS  |
| CFT073  | 3357940      | 3493616      | ns                         | rec    | i02_3351   | /         | CDS  |
| CFT073  | 3358000      | 3493676      | s                          | rec    | i02_3351   | /         | CDS  |
| CFT073  | 3358033      | 3493709      | s                          | rec    | i02_3351   | /         | CDS  |
| CFT073  | 3358063      | 3493739      | s                          | rec    | i02_3351   | /         | CDS  |
| CFT073  | 3358086      | 3493762      | ns                         | rec    | i02_3351   | /         | CDS  |
| CFT073  | 3358087      | 3493763      | ns                         | rec    | i02_3351   | /         | CDS  |
| CFT073  | 3358088      | 3493764      | ns                         | rec    | i02_3351   | /         | CDS  |
| CFT073  | 3358104      | 3493780      | ns                         | rec    | i02_3351   | /         | CDS  |
| CFT073  | 3358126      | 3493802      | s                          | rec    | i02_3351   | /         | CDS  |
| CFT073  | 3358129      | 3493805      | s                          | rec    | i02_3351   | /         | CDS  |
| CFT073  | 3358162      | 3493838      | s                          | rec    | i02_3351   | /         | CDS  |
| CFT073  | 3358177      | 3493853      | s                          | rec    | i02_3351   | /         | CDS  |
| CFT073  | 3358179      | 3493855      | ns                         | rec    | i02_3351   | /         | CDS  |
| clone D | 3358181      | 3493857      | s                          | rec    | i02_3351   | /         | CDS  |

| Lineage | Clone D site | CFT 073 site | mutation type <sup>a</sup> | recomb | Gene     | Gene name | Type |
|---------|--------------|--------------|----------------------------|--------|----------|-----------|------|
| CFT073  | 3358205      | 3493881      | ns                         | rec    | i02_3351 | /         | CDS  |
| CFT073  | 3358264      | 3493940      | s                          | rec    | i02_3351 | /         | CDS  |
| clone D | 3358330      | 3494006      | s                          | rec    | i02_3351 | /         | CDS  |
| clone D | 3358425      | 3494101      | ns                         | rec    | i02_3351 | /         | CDS  |
| clone D | 3358432      | 3494108      | s                          | rec    | i02_3351 | /         | CDS  |
| CFT073  | 3358471      | 3494147      | s                          | rec    | i02_3351 | /         | CDS  |
| CFT073  | 3358489      | 3494165      | s                          | rec    | i02_3351 | /         | CDS  |
| CFT073  | 3358498      | 3494174      | ns                         | rec    | i02_3351 | /         | CDS  |
| CFT073  | 3358513      | 3494189      | s                          | rec    | i02_3351 | /         | CDS  |
| CFT073  | 3358514      | 3494190      | ns                         | rec    | i02_3351 | /         | CDS  |
| CFT073  | 3358519      | 3494195      | s                          | rec    | i02_3351 | /         | CDS  |
| CFT073  | 3358520      | 3494196      | ns                         | rec    | i02_3351 | /         | CDS  |
| CFT073  | 3358525      | 3494201      | s                          | rec    | i02_3351 | /         | CDS  |
| CFT073  | 3358526      | 3494202      | ns                         | rec    | i02_3351 | /         | CDS  |
| CFT073  | 3358528      | 3494204      | ns                         | rec    | i02_3351 | /         | CDS  |
| CFT073  | 3358624      | 3494300      | s                          | rec    | i02_3351 | /         | CDS  |
| CFT073  | 3358625      | 3494301      | ns                         | rec    | i02_3351 | /         | CDS  |
| CFT073  | 3358630      | 3494306      | s                          | rec    | i02_3351 | /         | CDS  |
| clone D | 3358634      | 3494310      | ns                         | rec    | i02_3351 | /         | CDS  |
| clone D | 3358635      | 3494311      | ns                         | rec    | i02_3351 | /         | CDS  |
| CFT073  | 3358642      | 3494318      | s                          | rec    | i02_3351 | /         | CDS  |
| CFT073  | 3358666      | 3494342      | s                          | rec    | i02_3351 | /         | CDS  |
| CFT073  | 3358690      | 3494366      | s                          | rec    | i02_3351 | /         | CDS  |
| CFT073  | 3358707      | 3494383      | ns                         | rec    | i02_3351 | /         | CDS  |
| CFT073  | 3358726      | 3494402      | s                          | rec    | i02_3351 | /         | CDS  |
| clone D | 3358743      | 3494419      | ns                         | rec    | i02_3351 | /         | CDS  |
| clone D | 3358768      | 3494444      | s                          | rec    | i02_3351 | /         | CDS  |
| clone D | 3358803      | 3494479      | ns                         | rec    | i02_3351 | /         | CDS  |
| CFT073  | 3358804      | 3494480      | ns                         | rec    | i02_3351 | /         | CDS  |
| clone D | 3358813      | 3494489      | s                          | rec    | i02_3351 | /         | CDS  |
| clone D | 3358825      | 3494501      | s                          | rec    | i02_3351 | /         | CDS  |
| CFT073  | 3358831      | 3494507      | s                          | rec    | i02_3351 | /         | CDS  |
| clone D | 3358843      | 3494519      | s                          | rec    | i02_3351 | /         | CDS  |
| clone D | 3358844      | 3494520      | ns                         | rec    | i02_3351 | /         | CDS  |
| clone D | 3358849      | 3494525      | s                          | rec    | i02_3351 | /         | CDS  |
| CFT073  | 3358959      | 3494635      | ns                         | rec    | i02_3351 | /         | CDS  |
| CFT073  | 3358961      | 3494637      | ns                         | rec    | i02_3351 | /         | CDS  |
| CFT073  | 3358969      | 3494645      | s                          | rec    | i02_3351 | /         | CDS  |
| clone D | 3358976      | 3494652      | ns                         | rec    | i02_3351 | /         | CDS  |
| clone D | 3358985      | 3494661      | ns                         | rec    | i02_3351 | /         | CDS  |
| clone D | 3358991      | 3494667      | ns                         | rec    | i02_3351 | /         | CDS  |
| clone D | 3359002      | 3494678      | s                          | rec    | i02_3351 | /         | CDS  |
| CFT073  | 3359026      | 3494702      | s                          | rec    | i02_3351 | /         | CDS  |
| clone D | 3359053      | 3494729      | s                          | rec    | i02_3351 | /         | CDS  |
| CFT073  | 3359056      | 3494732      | s                          | rec    | i02_3351 | /         | CDS  |
| CFT073  | 3359060      | 3494736      | ns                         | rec    | i02_3351 | /         | CDS  |
| CFT073  | 3359062      | 3494738      | ns                         | rec    | i02_3351 | /         | CDS  |
| CFT073  | 3359063      | 3494739      | ns                         | rec    | i02_3351 | /         | CDS  |
| CFT073  | 3359068      | 3494744      | s                          | rec    | i02_3351 | /         | CDS  |
| CFT073  | 3359071      | 3494747      | s                          | rec    | i02_3351 | /         | CDS  |
| CFT073  | 3359072      | 3494748      | ns                         | rec    | i02_3351 | /         | CDS  |

| Lineage | Clone D site | CFT 073 site | mutation type <sup>a</sup> | recomb | Gene       | Gene name | Type |
|---------|--------------|--------------|----------------------------|--------|------------|-----------|------|
| CFT073  | 3359075      | 3494751      | ns                         | rec    | i02_3351   | /         | CDS  |
| CFT073  | 3359077      | 3494753      | ns                         | rec    | i02_3351   | /         | CDS  |
| CFT073  | 3359080      | 3494756      | s                          | rec    | i02_3351   | /         | CDS  |
| CFT073  | 3359086      | 3494762      | s                          | rec    | i02_3351   | /         | CDS  |
| CFT073  | 3359087      | 3494763      | ns                         | rec    | i02_3351   | /         | CDS  |
| CFT073  | 3359088      | 3494764      | ns                         | rec    | i02_3351   | /         | CDS  |
| CFT073  | 3359089      | 3494765      | ns                         | rec    | i02_3351   | /         | CDS  |
| CFT073  | 3359101      | 3494777      | s                          | rec    | i02_3351   | /         | CDS  |
| CFT073  | 3359104      | 3494780      | s                          | rec    | i02_3351   | /         | CDS  |
| clone D | 3359107      | 3494783      | s                          | rec    | i02_3351   | /         | CDS  |
| clone D | 3359109      | 3494785      | ns                         | rec    | i02_3351   | /         | CDS  |
| CFT073  | 3359119      | 3494795      | s                          | rec    | i02_3351   | /         | CDS  |
| clone D | 3359200      | 3494876      | s                          | rec    | i02_3351   | /         | CDS  |
| clone D | 3359211      | 3494887      | ns                         | rec    | i02_3351   | /         | CDS  |
| ?       | 3359224      | 3494900      | s                          | rec    | i02_3351   | /         | CDS  |
| CFT073  | 3359242      | 3494918      | s                          | rec    | i02_3351   | /         | CDS  |
| clone D | 3359277      | 3494953      | nc                         | rec    | intergenic |           |      |
| clone D | 3359288      | 3494964      | nc                         | rec    | intergenic |           |      |
| clone D | 3359298      | 3494974      | nc                         | rec    | intergenic |           |      |
| ?       | 3359324      | 3495000      | nc                         | rec    | intergenic |           |      |
| CFT073  | 3359506      | 3502073      | nc                         | rec    | intergenic |           |      |
| clone D | 3359631      | 3502198      | nc                         | rec    | intergenic |           |      |
| CFT073  | 3360045      | 3502612      | nc                         | rec    | intergenic |           |      |
| CFT073  | 3360247      | 3502814      | nc                         | rec    | intergenic |           |      |
| clone D | 3361096      | 3503663      | ns                         | rec    | i02_3353   | /         | CDS  |
| CFT073  | 3361932      | 3504499      | ns                         | rec    | i02_3354   | /         | CDS  |
| CFT073  | 3362618      | 3505185      | ns                         | rec    | i02_3355   | /         | CDS  |
| CFT073  | 3362901      | 3505468      | ns                         | rec    | i02_3356   | /         | CDS  |
| CFT073  | 3363111      | 3505678      | ns                         | rec    | i02_3356   | /         | CDS  |
| clone D | 3363486      | 3506053      | s                          | rec    | i02_3357   | /         | CDS  |
| CFT073  | 3363551      | 3506118      | ns                         | rec    | i02_3357   | /         | CDS  |
| clone D | 3363561      | 3506128      | s                          | rec    | i02_3357   | /         | CDS  |
| CFT073  | 3363566      | 3506133      | ns                         | rec    | i02_3357   | /         | CDS  |
| clone D | 3363568      | 3506135      | ns                         | rec    | i02_3357   | /         | CDS  |
| CFT073  | 3363569      | 3506136      | ns                         | rec    | i02_3357   | /         | CDS  |
| clone D | 3363577      | 3506144      | ns                         | rec    | i02_3357   | /         | CDS  |
| CFT073  | 3363845      | 3506412      | ns                         | rec    | i02_3358   | /         | CDS  |
| CFT073  | 3363861      | 3506428      | ns                         | rec    | i02_3358   | /         | CDS  |
| CFT073  | 3363863      | 3506430      | ns                         | rec    | i02_3358   | /         | CDS  |
| CFT073  | 3363866      | 3506433      | ns                         | rec    | i02_3358   | /         | CDS  |
| CFT073  | 3363870      | 3506437      | ns                         | rec    | i02_3358   | /         | CDS  |
| CFT073  | 3363877      | 3506444      | ns                         | rec    | i02_3358   | /         | CDS  |
| CFT073  | 3363887      | 3506454      | ns                         | rec    | i02_3358   | /         | CDS  |
| CFT073  | 3363888      | 3506455      | ns                         | rec    | i02_3358   | /         | CDS  |
| CFT073  | 3363893      | 3506460      | ns                         | rec    | i02_3358   | /         | CDS  |
| CFT073  | 3363896      | 3506463      | s                          | rec    | i02_3358   | /         | CDS  |
| CFT073  | 3363902      | 3506469      | ns                         | rec    | i02_3358   | /         | CDS  |
| CFT073  | 3363920      | 3506487      | ns                         | rec    | i02_3358   | /         | CDS  |
| CFT073  | 3363923      | 3506490      | ns                         | rec    | i02_3358   | /         | CDS  |
| CFT073  | 3364022      | 3506589      | s                          | rec    | i02_3358   | /         | CDS  |
| CFT073  | 3364025      | 3506592      | s                          | rec    | i02_3358   | /         | CDS  |

| Lineage | Clone D site | CFT 073 site | mutation type <sup>a</sup> | recomb | Gene       | Gene name | Type       |
|---------|--------------|--------------|----------------------------|--------|------------|-----------|------------|
| CFT073  | 3364345      | 3506912      | nc                         | rec    | i02_3359   | /         | pseudogene |
| CFT073  | 3364353      | 3506920      | nc                         | rec    | i02_3359   | /         | pseudogene |
| CFT073  | 3364356      | 3506923      | nc                         | rec    | i02_3359   | /         | pseudogene |
| CFT073  | 3364362      | 3506929      | nc                         | rec    | i02_3359   | /         | pseudogene |
| CFT073  | 3364365      | 3506932      | nc                         | rec    | i02_3359   | /         | pseudogene |
| clone D | 3364369      | 3506936      | nc                         | rec    | i02_3359   | /         | pseudogene |
| CFT073  | 3364425      | 3506992      | nc                         | rec    | i02_3359   | /         | pseudogene |
| CFT073  | 3364438      | 3507005      | nc                         | rec    | i02_3359   | /         | pseudogene |
| CFT073  | 3364449      | 3507016      | nc                         | rec    | i02_3359   | /         | pseudogene |
| clone D | 3364457      | 3507024      | nc                         | rec    | i02_3359   | /         | pseudogene |
| CFT073  | 3364467      | 3507034      | nc                         | rec    | i02_3359   | /         | pseudogene |
| CFT073  | 3364473      | 3507040      | nc                         | rec    | i02_3359   | /         | pseudogene |
| clone D | 3364490      | 3507057      | nc                         | rec    | i02_3359   | /         | pseudogene |
| clone D | 3364545      | 3507112      | nc                         | rec    | i02_3359   | /         | pseudogene |
| clone D | 3364560      | 3507127      | nc                         | rec    | i02_3359   | /         | pseudogene |
| CFT073  | 3364572      | 3507139      | nc                         | rec    | i02_3359   | /         | pseudogene |
| clone D | 3364578      | 3507145      | nc                         | rec    | i02_3359   | /         | pseudogene |
| clone D | 3364584      | 3507151      | nc                         | rec    | i02_3359   | /         | pseudogene |
| CFT073  | 3364587      | 3507154      | nc                         | rec    | i02_3359   | /         | pseudogene |
| clone D | 3364595      | 3507162      | nc                         | rec    | i02_3359   | /         | pseudogene |
| CFT073  | 3364620      | 3507187      | nc                         | rec    | i02_3359   | /         | pseudogene |
| CFT073  | 3364621      | 3507188      | nc                         | rec    | i02_3359   | /         | pseudogene |
| CFT073  | 3364624      | 3507191      | nc                         | rec    | i02_3359   | /         | pseudogene |
| clone D | 3364631      | 3507198      | nc                         | rec    | i02_3359   | /         | pseudogene |
| CFT073  | 3364633      | 3507200      | nc                         | rec    | i02_3359   | /         | pseudogene |
| clone D | 3364637      | 3507204      | nc                         | rec    | i02_3359   | /         | pseudogene |
| clone D | 3364643      | 3507209      | nc                         | rec    | i02_3359   | /         | pseudogene |
| clone D | 3364648      | 3507214      | nc                         | rec    | i02_3359   | /         | pseudogene |
| CFT073  | 3364655      | 3507221      | nc                         | rec    | i02_3359   | /         | pseudogene |
| clone D | 3364664      | 3507230      | nc                         | rec    | i02_3359   | /         | pseudogene |
| clone D | 3364675      | 3507241      | nc                         | rec    | i02_3359   | /         | pseudogene |
| CFT073  | 3364680      | 3507246      | nc                         | rec    | i02_3359   | /         | pseudogene |
| CFT073  | 3364812      | 3507379      | ns                         | rec    | i02_3360   | /         | CDS        |
| clone D | 3364944      | 3507511      | ns                         | rec    | i02_3360   | /         | CDS        |
| clone D | 3365279      | 3507846      | ns                         | rec    | i02_3361   | /         | CDS        |
| ?       | 3365280      | 3507847      | ns                         | rec    | i02_3361   | /         | CDS        |
| clone D | 3365554      | 3508121      | ns                         | rec    | i02_3361   | /         | CDS        |
| clone D | 3365639      | 3508206      | nc                         | rec    | intergenic |           |            |
| CFT073  | 3365781      | 3508348      | nc                         | rec    | intergenic |           |            |
| CFT073  | 3365801      | 3508368      | nc                         | rec    | intergenic |           |            |
| CFT073  | 3365825      | 3508392      | nc                         | rec    | intergenic |           |            |
| clone D | 3365848      | 3508415      | nc                         | rec    | intergenic |           |            |
| clone D | 3365850      | 3508417      | nc                         | rec    | intergenic |           |            |
| clone D | 3365864      | 3508431      | nc                         | rec    | intergenic |           |            |
| clone D | 3365870      | 3508437      | nc                         | rec    | intergenic |           |            |
| clone D | 3365871      | 3508438      | nc                         | rec    | intergenic |           |            |
| clone D | 3365872      | 3508439      | nc                         | rec    | intergenic |           |            |
| CFT073  | 3365874      | 3508441      | nc                         | rec    | intergenic |           |            |
| clone D | 3365883      | 3508450      | nc                         | rec    | intergenic |           |            |
| clone D | 3365885      | 3508452      | nc                         | rec    | intergenic |           |            |
| clone D | 3365890      | 3508457      | nc                         | rec    | intergenic |           |            |

| Lineage | Clone D site | CFT 073 site | mutation type <sup>a</sup> | recomb | Gene     | Gene name | Type |
|---------|--------------|--------------|----------------------------|--------|----------|-----------|------|
| clone D | 3365896      | 3508463      | s                          | rec    | i02_3362 | /         | CDS  |
| clone D | 3365906      | 3508473      | ns                         | rec    | i02_3362 | /         | CDS  |
| CFT073  | 3365907      | 3508474      | ns                         | rec    | i02_3362 | /         | CDS  |
| clone D | 3365914      | 3508481      | s                          | rec    | i02_3362 | /         | CDS  |
| clone D | 3365921      | 3508488      | ns                         | rec    | i02_3362 | /         | CDS  |
| clone D | 3365932      | 3508499      | s                          | rec    | i02_3362 | /         | CDS  |
| CFT073  | 3365941      | 3508508      | ns                         | rec    | i02_3362 | /         | CDS  |
| CFT073  | 3365964      | 3508531      | ns                         | rec    | i02_3362 | /         | CDS  |
| CFT073  | 3365986      | 3508553      | s                          | rec    | i02_3362 | /         | CDS  |
| clone D | 3365990      | 3508557      | ns                         | rec    | i02_3362 | /         | CDS  |
| clone D | 3365992      | 3508559      | ns                         | rec    | i02_3362 | /         | CDS  |
| clone D | 3366028      | 3508595      | s                          | rec    | i02_3362 | /         | CDS  |
| CFT073  | 3366040      | 3508607      | s                          | rec    | i02_3362 | /         | CDS  |
| CFT073  | 3366046      | 3508613      | s                          | rec    | i02_3362 | /         | CDS  |
| CFT073  | 3366052      | 3508619      | s                          | rec    | i02_3362 | /         | CDS  |
| CFT073  | 3366068      | 3508635      | ns                         | rec    | i02_3362 | /         | CDS  |
| CFT073  | 3366072      | 3508639      | ns                         | rec    | i02_3362 | /         | CDS  |
| clone D | 3366082      | 3508649      | s                          | rec    | i02_3362 | /         | CDS  |
| CFT073  | 3366127      | 3508694      | s                          | rec    | i02_3362 | /         | CDS  |
| CFT073  | 3366133      | 3508700      | s                          | rec    | i02_3362 | /         | CDS  |
| clone D | 3366157      | 3508724      | s                          | rec    | i02_3362 | /         | CDS  |
| clone D | 3366160      | 3508727      | s                          | rec    | i02_3362 | /         | CDS  |
| clone D | 3366163      | 3508730      | s                          | rec    | i02_3362 | /         | CDS  |
| CFT073  | 3366166      | 3508733      | s                          | rec    | i02_3362 | /         | CDS  |
| clone D | 3366192      | 3508759      | ns                         | rec    | i02_3362 | /         | CDS  |
| CFT073  | 3366197      | 3508764      | ns                         | rec    | i02_3362 | /         | CDS  |
| CFT073  | 3366205      | 3508772      | s                          | rec    | i02_3362 | /         | CDS  |
| CFT073  | 3366208      | 3508775      | s                          | rec    | i02_3362 | /         | CDS  |
| clone D | 3366228      | 3508795      | ns                         | rec    | i02_3362 | /         | CDS  |
| CFT073  | 3366244      | 3508811      | s                          | rec    | i02_3362 | /         | CDS  |
| CFT073  | 3366262      | 3508829      | s                          | rec    | i02_3362 | /         | CDS  |
| clone D | 3366280      | 3508847      | s                          | rec    | i02_3362 | /         | CDS  |
| clone D | 3366286      | 3508853      | s                          | rec    | i02_3362 | /         | CDS  |
| clone D | 3366289      | 3508856      | s                          | rec    | i02_3362 | /         | CDS  |
| clone D | 3366295      | 3508862      | s                          | rec    | i02_3362 | /         | CDS  |
| clone D | 3366298      | 3508865      | s                          | rec    | i02_3362 | /         | CDS  |
| CFT073  | 3366302      | 3508869      | ns                         | rec    | i02_3362 | /         | CDS  |
| CFT073  | 3366319      | 3508886      | s                          | rec    | i02_3362 | /         | CDS  |
| ?       | 3366328      | 3508895      | ns                         | rec    | i02_3362 | /         | CDS  |
| CFT073  | 3366340      | 3508907      | s                          | rec    | i02_3362 | /         | CDS  |
| clone D | 3366343      | 3508910      | s                          | rec    | i02_3362 | /         | CDS  |
| clone D | 3366353      | 3508920      | ns                         | rec    | i02_3362 | /         | CDS  |
| CFT073  | 3366361      | 3508928      | s                          | rec    | i02_3362 | /         | CDS  |
| CFT073  | 3366364      | 3508931      | s                          | rec    | i02_3362 | /         | CDS  |
| CFT073  | 3366379      | 3508946      | s                          | rec    | i02_3362 | /         | CDS  |
| CFT073  | 3366388      | 3508955      | s                          | rec    | i02_3362 | /         | CDS  |
| clone D | 3366390      | 3508957      | ns                         | rec    | i02_3362 | /         | CDS  |
| CFT073  | 3366391      | 3508958      | ns                         | rec    | i02_3362 | /         | CDS  |
| CFT073  | 3366406      | 3508973      | s                          | rec    | i02_3362 | /         | CDS  |
| clone D | 3366408      | 3508975      | ns                         | rec    | i02_3362 | /         | CDS  |
| CFT073  | 3366415      | 3508982      | s                          | rec    | i02_3362 | /         | CDS  |

| Lineage | Clone D site | CFT 073 site | mutation type <sup>a</sup> | recomb | Gene       | Gene name | Type |
|---------|--------------|--------------|----------------------------|--------|------------|-----------|------|
| CFT073  | 3366418      | 3508985      | s                          | rec    | i02_3362   | /         | CDS  |
| CFT073  | 3366419      | 3508986      | ns                         | rec    | i02_3362   | /         | CDS  |
| CFT073  | 3366445      | 3509012      | s                          | rec    | i02_3362   | /         | CDS  |
| CFT073  | 3366449      | 3509016      | ns                         | rec    | i02_3362   | /         | CDS  |
| CFT073  | 3366454      | 3509021      | ns                         | rec    | i02_3362   | /         | CDS  |
| CFT073  | 3366469      | 3509036      | s                          | rec    | i02_3362   | /         | CDS  |
| CFT073  | 3366476      | 3509043      | ns                         | rec    | i02_3362   | /         | CDS  |
| CFT073  | 3366478      | 3509045      | ns                         | rec    | i02_3362   | /         | CDS  |
| CFT073  | 3366481      | 3509048      | s                          | rec    | i02_3362   | /         | CDS  |
| clone D | 3366490      | 3509057      | s                          | rec    | i02_3362   | /         | CDS  |
| CFT073  | 3366493      | 3509060      | s                          | rec    | i02_3362   | /         | CDS  |
| clone D | 3366508      | 3509075      | s                          | rec    | i02_3362   | /         | CDS  |
| CFT073  | 3366522      | 3509089      | ns                         | rec    | i02_3362   | /         | CDS  |
| CFT073  | 3366532      | 3509099      | s                          | rec    | i02_3362   | /         | CDS  |
| CFT073  | 3366540      | 3509107      | ns                         | rec    | i02_3362   | /         | CDS  |
| CFT073  | 3366550      | 3509117      | s                          | rec    | i02_3362   | /         | CDS  |
| CFT073  | 3366555      | 3509122      | ns                         | rec    | i02_3362   | /         | CDS  |
| CFT073  | 3366556      | 3509123      | ns                         | rec    | i02_3362   | /         | CDS  |
| CFT073  | 3366562      | 3509129      | s                          | rec    | i02_3362   | /         | CDS  |
| CFT073  | 3366570      | 3509137      | ns                         | rec    | i02_3362   | /         | CDS  |
| CFT073  | 3366579      | 3509146      | ns                         | rec    | i02_3362   | /         | CDS  |
| CFT073  | 3366580      | 3509147      | ns                         | rec    | i02_3362   | /         | CDS  |
| CFT073  | 3366592      | 3509159      | s                          | rec    | i02_3362   | /         | CDS  |
| clone D | 3366597      | 3509164      | ns                         | rec    | i02_3362   | /         | CDS  |
| CFT073  | 3366599      | 3509166      | ns                         | rec    | i02_3362   | /         | CDS  |
| CFT073  | 3366610      | 3509177      | s                          | rec    | i02_3362   | /         | CDS  |
| CFT073  | 3366613      | 3509180      | s                          | rec    | i02_3362   | /         | CDS  |
| CFT073  | 3367165      | 3509732      | ns                         | rec    | i02_3363   | /         | CDS  |
| CFT073  | 3368458      | 3511026      | nc                         | rec    | intergenic |           |      |
| CFT073  | 3368624      | 3511192      | ns                         | rec    | i02_3366   | /         | CDS  |
| clone D | 3369004      | 3511572      | s                          | rec    | i02_3367   | /         | CDS  |
| clone D | 3369013      | 3511581      | ns                         | rec    | i02_3367   | /         | CDS  |
| CFT073  | 3369020      | 3511588      | ns                         | rec    | i02_3367   | /         | CDS  |
| clone D | 3369073      | 3511641      | nc                         | rec    | intergenic |           |      |
| CFT073  | 3369091      | 3511659      | nc                         | rec    | intergenic |           |      |
| CFT073  | 3369092      | 3511660      | nc                         | rec    | intergenic |           |      |
| clone D | 3369093      | 3511661      | nc                         | rec    | intergenic |           |      |
| clone D | 3369094      | 3511662      | nc                         | rec    | intergenic |           |      |
| clone D | 3369096      | 3511664      | nc                         | rec    | intergenic |           |      |
| CFT073  | 3369211      | 3511779      | nc                         | rec    | intergenic |           |      |
| clone D | 3369240      | 3511808      | nc                         | rec    | intergenic |           |      |
| CFT073  | 3369479      | 3512047      | nc                         | rec    | intergenic |           |      |
| CFT073  | 3369745      | 3512313      | ns                         | rec    | i02_3368   | /         | CDS  |
| CFT073  | 3369916      | 3512484      | s                          | rec    | i02_3368   | /         | CDS  |
| CFT073  | 3369977      | 3512545      | s                          | rec    | i02_3368   | /         | CDS  |
| CFT073  | 3370318      | 3512886      | s                          | rec    | i02_3368   | /         | CDS  |
| CFT073  | 3370335      | 3512903      | ns                         | rec    | i02_3368   | /         | CDS  |
| CFT073  | 3370351      | 3512919      | s                          | rec    | i02_3368   | /         | CDS  |
| CFT073  | 3370522      | 3513090      | nc                         | rec    | intergenic |           |      |
| CFT073  | 3370656      | 3513224      | s                          | rec    | i02_3369   | kpsE      | CDS  |
| CFT073  | 3370665      | 3513233      | s                          | rec    | i02_3369   | kpsE      | CDS  |

| Lineage | Clone D site | CFT 073 site | mutation type <sup>a</sup> | recomb | Gene       | Gene name | Type |
|---------|--------------|--------------|----------------------------|--------|------------|-----------|------|
| CFT073  | 3371250      | 3513818      | s                          | rec    | i02_3369   | kpsE      | CDS  |
| CFT073  | 3371671      | 3514239      | s                          | rec    | i02_3369   | kpsE      | CDS  |
| CFT073  | 3371673      | 3514241      | s                          | rec    | i02_3369   | kpsE      | CDS  |
| clone D | 3371811      | 3514379      | ns                         | rec    | i02_3370   | kpsD      | CDS  |
| CFT073  | 3371812      | 3514380      | ns                         | rec    | i02_3370   | kpsD      | CDS  |
| clone D | 3372174      | 3514742      | s                          | rec    | i02_3370   | kpsD      | CDS  |
| CFT073  | 3372413      | 3514981      | s                          | rec    | i02_3370   | kpsD      | CDS  |
| clone D | 3372449      | 3515017      | s                          | rec    | i02_3370   | kpsD      | CDS  |
| clone D | 3372491      | 3515059      | s                          | rec    | i02_3370   | kpsD      | CDS  |
| CFT073  | 3372695      | 3515263      | s                          | rec    | i02_3370   | kpsD      | CDS  |
| CFT073  | 3372698      | 3515266      | s                          | rec    | i02_3370   | kpsD      | CDS  |
| CFT073  | 3372734      | 3515302      | s                          | rec    | i02_3370   | kpsD      | CDS  |
| clone D | 3372789      | 3515357      | s                          | rec    | i02_3370   | kpsD      | CDS  |
| CFT073  | 3372815      | 3515383      | s                          | rec    | i02_3370   | kpsD      | CDS  |
| clone D | 3372938      | 3515506      | s                          | rec    | i02_3370   | kpsD      | CDS  |
| clone D | 3373148      | 3515716      | s                          | rec    | i02_3370   | kpsD      | CDS  |
| clone D | 3373181      | 3515749      | s                          | rec    | i02_3370   | kpsD      | CDS  |
| clone D | 3373184      | 3515752      | s                          | rec    | i02_3370   | kpsD      | CDS  |
| clone D | 3373214      | 3515782      | s                          | rec    | i02_3370   | kpsD      | CDS  |
| clone D | 3373274      | 3515842      | s                          | rec    | i02_3370   | kpsD      | CDS  |
| clone D | 3373277      | 3515845      | s                          | rec    | i02_3370   | kpsD      | CDS  |
| clone D | 3373286      | 3515854      | s                          | rec    | i02_3370   | kpsD      | CDS  |
| clone D | 3373295      | 3515863      | s                          | rec    | i02_3370   | kpsD      | CDS  |
| clone D | 3373307      | 3515875      | s                          | rec    | i02_3370   | kpsD      | CDS  |
| clone D | 3373310      | 3515878      | s                          | rec    | i02_3370   | kpsD      | CDS  |
| CFT073  | 3373352      | 3515920      | s                          | rec    | i02_3370   | kpsD      | CDS  |
| clone D | 3373430      | 3515998      | nc                         | rec    | intergenic |           |      |
| CFT073  | 3373448      | 3516016      | s                          | rec    | i02_3371   | /         | CDS  |
| CFT073  | 3373460      | 3516028      | s                          | rec    | i02_3371   | /         | CDS  |
| clone D | 3373469      | 3516037      | s                          | rec    | i02_3371   | /         | CDS  |
| clone D | 3373478      | 3516046      | s                          | rec    | i02_3371   | /         | CDS  |
| CFT073  | 3373561      | 3516129      | ns                         | rec    | i02_3371   | /         | CDS  |
| clone D | 3373597      | 3516165      | ns                         | rec    | i02_3371   | /         | CDS  |
| clone D | 3373608      | 3516176      | ns                         | rec    | i02_3371   | /         | CDS  |
| clone D | 3373616      | 3516184      | s                          | rec    | i02_3371   | /         | CDS  |
| clone D | 3373622      | 3516190      | s                          | rec    | i02_3371   | /         | CDS  |
| CFT073  | 3373635      | 3516203      | ns                         | rec    | i02_3371   | /         | CDS  |
| CFT073  | 3373713      | 3516281      | ns                         | rec    | i02_3371   | /         | CDS  |
| CFT073  | 3373751      | 3516319      | s                          | rec    | i02_3371   | /         | CDS  |
| CFT073  | 3373762      | 3516330      | ns                         | rec    | i02_3371   | /         | CDS  |
| clone D | 3373770      | 3516338      | s                          | rec    | i02_3371   | /         | CDS  |
| clone D | 3373787      | 3516355      | s                          | rec    | i02_3371   | /         | CDS  |
| clone D | 3373790      | 3516358      | s                          | rec    | i02_3371   | /         | CDS  |
| clone D | 3373802      | 3516370      | s                          | rec    | i02_3371   | /         | CDS  |
| clone D | 3373834      | 3516402      | ns                         | rec    | i02_3371   | /         | CDS  |
| clone D | 3373842      | 3516410      | ns                         | rec    | i02_3371   | /         | CDS  |
| clone D | 3373844      | 3516412      | ns                         | rec    | i02_3371   | /         | CDS  |
| clone D | 3373868      | 3516436      | s                          | rec    | i02_3371   | /         | CDS  |
| clone D | 3373871      | 3516439      | s                          | rec    | i02_3371   | /         | CDS  |
| CFT073  | 3373898      | 3516466      | s                          | rec    | i02_3371   | /         | CDS  |
| clone D | 3373904      | 3516472      | s                          | rec    | i02_3371   | /         | CDS  |

| Lineage | Clone D site | CFT 073 site | mutation type <sup>a</sup> | recomb | Gene     | Gene name | Type |
|---------|--------------|--------------|----------------------------|--------|----------|-----------|------|
| clone D | 3373907      | 3516475      | s                          | rec    | i02_3371 | /         | CDS  |
| CFT073  | 3373916      | 3516484      | s                          | rec    | i02_3371 | /         | CDS  |
| clone D | 3373958      | 3516526      | s                          | rec    | i02_3371 | /         | CDS  |
| CFT073  | 3374021      | 3516589      | s                          | rec    | i02_3371 | /         | CDS  |
| clone D | 3374030      | 3516598      | s                          | rec    | i02_3371 | /         | CDS  |
| clone D | 3374049      | 3516617      | s                          | rec    | i02_3371 | /         | CDS  |
| CFT073  | 3374054      | 3516622      | s                          | rec    | i02_3371 | /         | CDS  |
| CFT073  | 3374075      | 3516643      | s                          | rec    | i02_3371 | /         | CDS  |
| CFT073  | 3374081      | 3516649      | s                          | rec    | i02_3371 | /         | CDS  |
| CFT073  | 3374088      | 3516656      | ns                         | rec    | i02_3371 | /         | CDS  |
| CFT073  | 3374149      | 3516717      | ns                         | rec    | i02_3371 | /         | CDS  |
| CFT073  | 3374239      | 3516807      | s                          | rec    | i02_3372 | kpsC      | CDS  |
| clone D | 3374272      | 3516840      | s                          | rec    | i02_3372 | kpsC      | CDS  |
| CFT073  | 3374276      | 3516844      | ns                         | rec    | i02_3372 | kpsC      | CDS  |
| CFT073  | 3374278      | 3516846      | ns                         | rec    | i02_3372 | kpsC      | CDS  |
| CFT073  | 3374281      | 3516849      | s                          | rec    | i02_3372 | kpsC      | CDS  |
| clone D | 3374444      | 3517012      | ns                         | rec    | i02_3372 | kpsC      | CDS  |
| CFT073  | 3374473      | 3517041      | s                          | rec    | i02_3372 | kpsC      | CDS  |
| CFT073  | 3374476      | 3517044      | s                          | rec    | i02_3372 | kpsC      | CDS  |
| clone D | 3374494      | 3517062      | s                          | rec    | i02_3372 | kpsC      | CDS  |
| CFT073  | 3374510      | 3517078      | ns                         | rec    | i02_3372 | kpsC      | CDS  |
| CFT073  | 3374512      | 3517080      | ns                         | rec    | i02_3372 | kpsC      | CDS  |
| ?       | 3374515      | 3517083      | s                          | rec    | i02_3372 | kpsC      | CDS  |
| ?       | 3374516      | 3517084      | s                          | rec    | i02_3372 | kpsC      | CDS  |
| ?       | 3374519      | 3517087      | ns                         | rec    | i02_3372 | kpsC      | CDS  |
| clone D | 3374520      | 3517088      | ns                         | rec    | i02_3372 | kpsC      | CDS  |
| clone D | 3374521      | 3517089      | ns                         | rec    | i02_3372 | kpsC      | CDS  |
| clone D | 3374522      | 3517090      | ns                         | rec    | i02_3372 | kpsC      | CDS  |
| clone D | 3374523      | 3517091      | ns                         | rec    | i02_3372 | kpsC      | CDS  |
| clone D | 3374524      | 3517092      | ns                         | rec    | i02_3372 | kpsC      | CDS  |
| CFT073  | 3374584      | 3517152      | s                          | rec    | i02_3372 | kpsC      | CDS  |
| CFT073  | 3374590      | 3517158      | s                          | rec    | i02_3372 | kpsC      | CDS  |
| clone D | 3374615      | 3517183      | ns                         | rec    | i02_3372 | kpsC      | CDS  |
| CFT073  | 3374653      | 3517221      | s                          | rec    | i02_3372 | kpsC      | CDS  |
| CFT073  | 3374659      | 3517227      | s                          | rec    | i02_3372 | kpsC      | CDS  |
| CFT073  | 3374710      | 3517278      | s                          | rec    | i02_3372 | kpsC      | CDS  |
| CFT073  | 3374718      | 3517286      | ns                         | rec    | i02_3372 | kpsC      | CDS  |
| clone D | 3374794      | 3517362      | s                          | rec    | i02_3372 | kpsC      | CDS  |
| clone D | 3374796      | 3517364      | ns                         | rec    | i02_3372 | kpsC      | CDS  |
| clone D | 3374803      | 3517371      | s                          | rec    | i02_3372 | kpsC      | CDS  |
| clone D | 3374824      | 3517392      | s                          | rec    | i02_3372 | kpsC      | CDS  |
| clone D | 3374854      | 3517422      | s                          | rec    | i02_3372 | kpsC      | CDS  |
| CFT073  | 3374887      | 3517455      | s                          | rec    | i02_3372 | kpsC      | CDS  |
| clone D | 3374893      | 3517461      | s                          | rec    | i02_3372 | kpsC      | CDS  |
| clone D | 3374926      | 3517494      | s                          | rec    | i02_3372 | kpsC      | CDS  |
| clone D | 3374929      | 3517497      | s                          | rec    | i02_3372 | kpsC      | CDS  |
| clone D | 3374935      | 3517503      | s                          | rec    | i02_3372 | kpsC      | CDS  |
| clone D | 3375031      | 3517599      | s                          | rec    | i02_3372 | kpsC      | CDS  |
| CFT073  | 3375076      | 3517644      | s                          | rec    | i02_3372 | kpsC      | CDS  |
| CFT073  | 3375081      | 3517649      | ns                         | rec    | i02_3372 | kpsC      | CDS  |
| CFT073  | 3375082      | 3517650      | ns                         | rec    | i02_3372 | kpsC      | CDS  |



| Lineage | Clone D site | CFT 073 site | mutation type <sup>a</sup> | recomb | Gene     | Gene name | Type |
|---------|--------------|--------------|----------------------------|--------|----------|-----------|------|
| CFT073  | 3375088      | 3517656      | s                          | rec    | i02_3372 | kpsC      | CDS  |
| CFT073  | 3375090      | 3517658      | ns                         | rec    | i02_3372 | kpsC      | CDS  |
| CFT073  | 3375091      | 3517659      | ns                         | rec    | i02_3372 | kpsC      | CDS  |
| CFT073  | 3375093      | 3517661      | ns                         | rec    | i02_3372 | kpsC      | CDS  |
| clone D | 3375098      | 3517666      | ns                         | rec    | i02_3372 | kpsC      | CDS  |
| CFT073  | 3375103      | 3517671      | s                          | rec    | i02_3372 | kpsC      | CDS  |
| CFT073  | 3375112      | 3517680      | s                          | rec    | i02_3372 | kpsC      | CDS  |
| CFT073  | 3375133      | 3517701      | s                          | rec    | i02_3372 | kpsC      | CDS  |
| CFT073  | 3375136      | 3517704      | s                          | rec    | i02_3372 | kpsC      | CDS  |
| CFT073  | 3375137      | 3517705      | ns                         | rec    | i02_3372 | kpsC      | CDS  |
| CFT073  | 3375138      | 3517706      | ns                         | rec    | i02_3372 | kpsC      | CDS  |
| CFT073  | 3375139      | 3517707      | ns                         | rec    | i02_3372 | kpsC      | CDS  |
| CFT073  | 3375144      | 3517712      | ns                         | rec    | i02_3372 | kpsC      | CDS  |
| CFT073  | 3375160      | 3517728      | s                          | rec    | i02_3372 | kpsC      | CDS  |
| CFT073  | 3375196      | 3517764      | s                          | rec    | i02_3372 | kpsC      | CDS  |
| CFT073  | 3375199      | 3517767      | s                          | rec    | i02_3372 | kpsC      | CDS  |
| CFT073  | 3375218      | 3517786      | ns                         | rec    | i02_3372 | kpsC      | CDS  |
| CFT073  | 3375219      | 3517787      | ns                         | rec    | i02_3372 | kpsC      | CDS  |
| CFT073  | 3375220      | 3517788      | ns                         | rec    | i02_3372 | kpsC      | CDS  |
| CFT073  | 3375223      | 3517791      | s                          | rec    | i02_3372 | kpsC      | CDS  |
| CFT073  | 3375233      | 3517801      | s                          | rec    | i02_3372 | kpsC      | CDS  |
| CFT073  | 3375235      | 3517803      | s                          | rec    | i02_3372 | kpsC      | CDS  |
| CFT073  | 3375243      | 3517811      | ns                         | rec    | i02_3372 | kpsC      | CDS  |
| CFT073  | 3375250      | 3517818      | s                          | rec    | i02_3372 | kpsC      | CDS  |
| CFT073  | 3375253      | 3517821      | s                          | rec    | i02_3372 | kpsC      | CDS  |
| CFT073  | 3375267      | 3517835      | ns                         | rec    | i02_3372 | kpsC      | CDS  |
| CFT073  | 3375268      | 3517836      | ns                         | rec    | i02_3372 | kpsC      | CDS  |
| CFT073  | 3375271      | 3517839      | s                          | rec    | i02_3372 | kpsC      | CDS  |
| CFT073  | 3375309      | 3517877      | ns                         | rec    | i02_3372 | kpsC      | CDS  |
| CFT073  | 3375322      | 3517890      | s                          | rec    | i02_3372 | kpsC      | CDS  |
| CFT073  | 3375324      | 3517892      | ns                         | rec    | i02_3372 | kpsC      | CDS  |
| clone D | 3375364      | 3517932      | s                          | rec    | i02_3372 | kpsC      | CDS  |
| ?       | 3375412      | 3517980      | s                          | rec    | i02_3372 | kpsC      | CDS  |
| CFT073  | 3375466      | 3518034      | s                          | rec    | i02_3372 | kpsC      | CDS  |
| clone D | 3375490      | 3518058      | s                          | rec    | i02_3372 | kpsC      | CDS  |
| clone D | 3375708      | 3518276      | ns                         | rec    | i02_3372 | kpsC      | CDS  |
| clone D | 3375841      | 3518409      | s                          | rec    | i02_3372 | kpsC      | CDS  |
| clone D | 3375970      | 3518538      | s                          | rec    | i02_3372 | kpsC      | CDS  |
| clone D | 3375979      | 3518547      | s                          | rec    | i02_3372 | kpsC      | CDS  |
| clone D | 3375987      | 3518555      | ns                         | rec    | i02_3372 | kpsC      | CDS  |
| clone D | 3375988      | 3518556      | ns                         | rec    | i02_3372 | kpsC      | CDS  |
| clone D | 3375990      | 3518558      | ns                         | rec    | i02_3372 | kpsC      | CDS  |
| clone D | 3376006      | 3518574      | s                          | rec    | i02_3372 | kpsC      | CDS  |
| clone D | 3376033      | 3518601      | s                          | rec    | i02_3372 | kpsC      | CDS  |
| clone D | 3376039      | 3518607      | s                          | rec    | i02_3372 | kpsC      | CDS  |
| clone D | 3376045      | 3518613      | s                          | rec    | i02_3372 | kpsC      | CDS  |
| clone D | 3376056      | 3518624      | ns                         | rec    | i02_3372 | kpsC      | CDS  |
| clone D | 3376063      | 3518631      | s                          | rec    | i02_3372 | kpsC      | CDS  |
| clone D | 3376078      | 3518646      | s                          | rec    | i02_3372 | kpsC      | CDS  |
| clone D | 3376081      | 3518649      | s                          | rec    | i02_3372 | kpsC      | CDS  |
| clone D | 3376084      | 3518652      | s                          | rec    | i02_3372 | kpsC      | CDS  |

| Lineage | Clone D site | CFT 073 site | mutation type <sup>a</sup> | recomb | Gene       | Gene name | Type |
|---------|--------------|--------------|----------------------------|--------|------------|-----------|------|
| clone D | 3376096      | 3518664      | s                          | rec    | i02_3372   | kpsC      | CDS  |
| clone D | 3376111      | 3518679      | s                          | rec    | i02_3372   | kpsC      | CDS  |
| clone D | 3376144      | 3518712      | s                          | rec    | i02_3372   | kpsC      | CDS  |
| clone D | 3376147      | 3518715      | s                          | rec    | i02_3372   | kpsC      | CDS  |
| clone D | 3376211      | 3518779      | nc                         | rec    | intergenic |           |      |
| clone D | 3376228      | 3518796      | nc                         | rec    | intergenic |           |      |
| clone D | 3376244      | 3518812      | s                          | rec    | i02_3373   | kpsS      | CDS  |
| clone D | 3376247      | 3518815      | s                          | rec    | i02_3373   | kpsS      | CDS  |
| clone D | 3376257      | 3518825      | ns                         | rec    | i02_3373   | kpsS      | CDS  |
| clone D | 3376268      | 3518836      | s                          | rec    | i02_3373   | kpsS      | CDS  |
| clone D | 3376295      | 3518863      | s                          | rec    | i02_3373   | kpsS      | CDS  |
| clone D | 3376298      | 3518866      | s                          | rec    | i02_3373   | kpsS      | CDS  |
| clone D | 3376307      | 3518875      | s                          | rec    | i02_3373   | kpsS      | CDS  |
| clone D | 3376315      | 3518883      | ns                         | rec    | i02_3373   | kpsS      | CDS  |
| clone D | 3376319      | 3518887      | s                          | rec    | i02_3373   | kpsS      | CDS  |
| CFT073  | 3376322      | 3518890      | s                          | rec    | i02_3373   | kpsS      | CDS  |
| clone D | 3376328      | 3518896      | s                          | rec    | i02_3373   | kpsS      | CDS  |
| clone D | 3376332      | 3518900      | s                          | rec    | i02_3373   | kpsS      | CDS  |
| clone D | 3376346      | 3518914      | s                          | rec    | i02_3373   | kpsS      | CDS  |
| CFT073  | 3376367      | 3518935      | s                          | rec    | i02_3373   | kpsS      | CDS  |
| CFT073  | 3376376      | 3518944      | s                          | rec    | i02_3373   | kpsS      | CDS  |
| clone D | 3376412      | 3518980      | s                          | rec    | i02_3373   | kpsS      | CDS  |
| clone D | 3376424      | 3518992      | s                          | rec    | i02_3373   | kpsS      | CDS  |
| clone D | 3376427      | 3518995      | s                          | rec    | i02_3373   | kpsS      | CDS  |
| CFT073  | 3376456      | 3519024      | ns                         | rec    | i02_3373   | kpsS      | CDS  |
| clone D | 3376481      | 3519049      | s                          | rec    | i02_3373   | kpsS      | CDS  |
| clone D | 3376484      | 3519052      | s                          | rec    | i02_3373   | kpsS      | CDS  |
| clone D | 3376499      | 3519067      | s                          | rec    | i02_3373   | kpsS      | CDS  |
| CFT073  | 3376517      | 3519085      | s                          | rec    | i02_3373   | kpsS      | CDS  |
| clone D | 3376559      | 3519127      | s                          | rec    | i02_3373   | kpsS      | CDS  |
| clone D | 3376571      | 3519139      | s                          | rec    | i02_3373   | kpsS      | CDS  |
| CFT073  | 3376598      | 3519166      | s                          | rec    | i02_3373   | kpsS      | CDS  |
| CFT073  | 3376631      | 3519199      | s                          | rec    | i02_3373   | kpsS      | CDS  |
| CFT073  | 3376667      | 3519235      | s                          | rec    | i02_3373   | kpsS      | CDS  |
| clone D | 3376680      | 3519248      | ns                         | rec    | i02_3373   | kpsS      | CDS  |
| clone D | 3376721      | 3519289      | s                          | rec    | i02_3373   | kpsS      | CDS  |
| clone D | 3376724      | 3519292      | s                          | rec    | i02_3373   | kpsS      | CDS  |
| clone D | 3376733      | 3519301      | s                          | rec    | i02_3373   | kpsS      | CDS  |
| clone D | 3376775      | 3519343      | s                          | rec    | i02_3373   | kpsS      | CDS  |
| clone D | 3376838      | 3519406      | s                          | rec    | i02_3373   | kpsS      | CDS  |
| CFT073  | 3376874      | 3519442      | s                          | rec    | i02_3373   | kpsS      | CDS  |
| clone D | 3376883      | 3519451      | s                          | rec    | i02_3373   | kpsS      | CDS  |
| clone D | 3376898      | 3519466      | s                          | rec    | i02_3373   | kpsS      | CDS  |
| clone D | 3376901      | 3519469      | s                          | rec    | i02_3373   | kpsS      | CDS  |
| clone D | 3376907      | 3519475      | s                          | rec    | i02_3373   | kpsS      | CDS  |
| clone D | 3376925      | 3519493      | s                          | rec    | i02_3373   | kpsS      | CDS  |
| CFT073  | 3376967      | 3519535      | s                          | rec    | i02_3373   | kpsS      | CDS  |
| clone D | 3376969      | 3519537      | ns                         | rec    | i02_3373   | kpsS      | CDS  |
| CFT073  | 3377018      | 3519586      | s                          | rec    | i02_3373   | kpsS      | CDS  |
| clone D | 3377102      | 3519670      | s                          | rec    | i02_3373   | kpsS      | CDS  |
| clone D | 3377105      | 3519673      | s                          | rec    | i02_3373   | kpsS      | CDS  |

| Lineage | Clone D site | CFT 073 site | mutation type <sup>a</sup> | recomb | Gene     | Gene name | Type |
|---------|--------------|--------------|----------------------------|--------|----------|-----------|------|
| clone D | 3377128      | 3519696      | ns                         | rec    | i02_3373 | kpsS      | CDS  |
| clone D | 3377136      | 3519704      | ns                         | rec    | i02_3373 | kpsS      | CDS  |
| clone D | 3377139      | 3519707      | ns                         | rec    | i02_3373 | kpsS      | CDS  |
| clone D | 3377192      | 3519760      | s                          | rec    | i02_3373 | kpsS      | CDS  |
| clone D | 3377279      | 3519847      | s                          | rec    | i02_3373 | kpsS      | CDS  |
| clone D | 3377321      | 3519889      | s                          | rec    | i02_3373 | kpsS      | CDS  |
| clone D | 3377333      | 3519901      | s                          | rec    | i02_3373 | kpsS      | CDS  |
| CFT073  | 3377336      | 3519904      | s                          | rec    | i02_3373 | kpsS      | CDS  |
| clone D | 3377360      | 3519928      | s                          | rec    | i02_3373 | kpsS      | CDS  |
| CFT073  | 3377392      | 3519960      | ns                         | rec    | i02_3373 | kpsS      | CDS  |
| CFT073  | 3377395      | 3519963      | ns                         | rec    | i02_3373 | kpsS      | CDS  |
| clone D | 3385786      | 3527989      | s                          | rec    | i02_3377 | kpsT      | CDS  |
| clone D | 3385798      | 3528001      | s                          | rec    | i02_3377 | kpsT      | CDS  |
| clone D | 3385831      | 3528034      | s                          | rec    | i02_3377 | kpsT      | CDS  |
| clone D | 3385834      | 3528037      | s                          | rec    | i02_3377 | kpsT      | CDS  |
| CFT073  | 3385858      | 3528061      | s                          | rec    | i02_3377 | kpsT      | CDS  |
| ?       | 3385861      | 3528064      | s                          | rec    | i02_3377 | kpsT      | CDS  |
| clone D | 3385939      | 3528142      | s                          | rec    | i02_3377 | kpsT      | CDS  |
| clone D | 3385951      | 3528154      | s                          | rec    | i02_3377 | kpsT      | CDS  |
| clone D | 3385963      | 3528166      | s                          | rec    | i02_3377 | kpsT      | CDS  |
| CFT073  | 3385972      | 3528175      | s                          | rec    | i02_3377 | kpsT      | CDS  |
| CFT073  | 3385975      | 3528178      | s                          | rec    | i02_3377 | kpsT      | CDS  |
| CFT073  | 3385993      | 3528196      | s                          | rec    | i02_3377 | kpsT      | CDS  |
| CFT073  | 3386017      | 3528220      | s                          | rec    | i02_3377 | kpsT      | CDS  |
| clone D | 3386083      | 3528286      | s                          | rec    | i02_3377 | kpsT      | CDS  |
| clone D | 3386092      | 3528295      | s                          | rec    | i02_3377 | kpsT      | CDS  |
| CFT073  | 3386095      | 3528298      | s                          | rec    | i02_3377 | kpsT      | CDS  |
| clone D | 3386116      | 3528319      | s                          | rec    | i02_3377 | kpsT      | CDS  |
| clone D | 3386125      | 3528328      | s                          | rec    | i02_3377 | kpsT      | CDS  |
| clone D | 3386140      | 3528343      | s                          | rec    | i02_3377 | kpsT      | CDS  |
| clone D | 3386143      | 3528346      | s                          | rec    | i02_3377 | kpsT      | CDS  |
| clone D | 3386218      | 3528421      | s                          | rec    | i02_3377 | kpsT      | CDS  |
| CFT073  | 3386241      | 3528444      | ns                         | rec    | i02_3377 | kpsT      | CDS  |
| clone D | 3386263      | 3528466      | s                          | rec    | i02_3377 | kpsT      | CDS  |
| clone D | 3386269      | 3528472      | s                          | rec    | i02_3377 | kpsT      | CDS  |
| clone D | 3386281      | 3528484      | s                          | rec    | i02_3377 | kpsT      | CDS  |
| CFT073  | 3386346      | 3528549      | s                          | rec    | i02_3378 | kpsM      | CDS  |
| CFT073  | 3386361      | 3528564      | s                          | rec    | i02_3378 | kpsM      | CDS  |
| CFT073  | 3386370      | 3528573      | s                          | rec    | i02_3378 | kpsM      | CDS  |
| CFT073  | 3386373      | 3528576      | ns                         | rec    | i02_3378 | kpsM      | CDS  |
| CFT073  | 3386375      | 3528578      | ns                         | rec    | i02_3378 | kpsM      | CDS  |
| CFT073  | 3386378      | 3528581      | s                          | rec    | i02_3378 | kpsM      | CDS  |
| CFT073  | 3386379      | 3528582      | s                          | rec    | i02_3378 | kpsM      | CDS  |
| CFT073  | 3386391      | 3528594      | s                          | rec    | i02_3378 | kpsM      | CDS  |
| CFT073  | 3386409      | 3528612      | s                          | rec    | i02_3378 | kpsM      | CDS  |
| CFT073  | 3386418      | 3528621      | s                          | rec    | i02_3378 | kpsM      | CDS  |
| CFT073  | 3386436      | 3528639      | s                          | rec    | i02_3378 | kpsM      | CDS  |
| CFT073  | 3386442      | 3528645      | s                          | rec    | i02_3378 | kpsM      | CDS  |
| CFT073  | 3386454      | 3528657      | s                          | rec    | i02_3378 | kpsM      | CDS  |
| CFT073  | 3386468      | 3528671      | s                          | rec    | i02_3378 | kpsM      | CDS  |
| clone D | 3386502      | 3528705      | s                          | rec    | i02_3378 | kpsM      | CDS  |

| Lineage | Clone D site | CFT 073 site | mutation type <sup>a</sup> | recomb | Gene       | Gene name | Type |
|---------|--------------|--------------|----------------------------|--------|------------|-----------|------|
| clone D | 3386508      | 3528711      | s                          | rec    | i02_3378   | kpsM      | CDS  |
| clone D | 3386511      | 3528714      | s                          | rec    | i02_3378   | kpsM      | CDS  |
| clone D | 3386514      | 3528717      | s                          | rec    | i02_3378   | kpsM      | CDS  |
| CFT073  | 3386544      | 3528747      | s                          | rec    | i02_3378   | kpsM      | CDS  |
| CFT073  | 3386547      | 3528750      | s                          | rec    | i02_3378   | kpsM      | CDS  |
| CFT073  | 3386556      | 3528759      | s                          | rec    | i02_3378   | kpsM      | CDS  |
| CFT073  | 3386568      | 3528771      | s                          | rec    | i02_3378   | kpsM      | CDS  |
| CFT073  | 3386583      | 3528786      | s                          | rec    | i02_3378   | kpsM      | CDS  |
| clone D | 3386621      | 3528824      | ns                         | rec    | i02_3378   | kpsM      | CDS  |
| CFT073  | 3386624      | 3528827      | ns                         | rec    | i02_3378   | kpsM      | CDS  |
| CFT073  | 3386625      | 3528828      | s                          | rec    | i02_3378   | kpsM      | CDS  |
| CFT073  | 3386640      | 3528843      | s                          | rec    | i02_3378   | kpsM      | CDS  |
| CFT073  | 3386642      | 3528845      | s                          | rec    | i02_3378   | kpsM      | CDS  |
| CFT073  | 3386645      | 3528848      | s                          | rec    | i02_3378   | kpsM      | CDS  |
| CFT073  | 3386655      | 3528858      | ns                         | rec    | i02_3378   | kpsM      | CDS  |
| CFT073  | 3386656      | 3528859      | ns                         | rec    | i02_3378   | kpsM      | CDS  |
| CFT073  | 3386657      | 3528860      | ns                         | rec    | i02_3378   | kpsM      | CDS  |
| clone D | 3386661      | 3528864      | s                          | rec    | i02_3378   | kpsM      | CDS  |
| clone D | 3386673      | 3528876      | s                          | rec    | i02_3378   | kpsM      | CDS  |
| clone D | 3386694      | 3528897      | s                          | rec    | i02_3378   | kpsM      | CDS  |
| CFT073  | 3386705      | 3528908      | ns                         | rec    | i02_3378   | kpsM      | CDS  |
| CFT073  | 3386709      | 3528912      | s                          | rec    | i02_3378   | kpsM      | CDS  |
| CFT073  | 3386712      | 3528915      | s                          | rec    | i02_3378   | kpsM      | CDS  |
| clone D | 3386718      | 3528921      | s                          | rec    | i02_3378   | kpsM      | CDS  |
| clone D | 3386723      | 3528926      | s                          | rec    | i02_3378   | kpsM      | CDS  |
| clone D | 3386724      | 3528927      | s                          | rec    | i02_3378   | kpsM      | CDS  |
| CFT073  | 3386735      | 3528938      | ns                         | rec    | i02_3378   | kpsM      | CDS  |
| clone D | 3386760      | 3528963      | s                          | rec    | i02_3378   | kpsM      | CDS  |
| clone D | 3386766      | 3528969      | s                          | rec    | i02_3378   | kpsM      | CDS  |
| CFT073  | 3386796      | 3528999      | s                          | rec    | i02_3378   | kpsM      | CDS  |
| clone D | 3386810      | 3529013      | s                          | rec    | i02_3378   | kpsM      | CDS  |
| clone D | 3386832      | 3529035      | ns                         | rec    | i02_3378   | kpsM      | CDS  |
| CFT073  | 3386834      | 3529037      | ns                         | rec    | i02_3378   | kpsM      | CDS  |
| CFT073  | 3386844      | 3529047      | ns                         | rec    | i02_3378   | kpsM      | CDS  |
| CFT073  | 3386904      | 3529107      | s                          | rec    | i02_3378   | kpsM      | CDS  |
| clone D | 3386993      | 3529196      | s                          | rec    | i02_3378   | kpsM      | CDS  |
| CFT073  | 3387093      | 3529296      | nc                         | rec    | intergenic |           |      |
| CFT073  | 3387107      | 3529310      | nc                         | rec    | intergenic |           |      |
| CFT073  | 3387120      | 3529323      | nc                         | rec    | intergenic |           |      |
| CFT073  | 3387131      | 3529334      | nc                         | rec    | intergenic |           |      |
| CFT073  | 3387165      | 3529368      | nc                         | rec    | intergenic |           |      |
| CFT073  | 3387169      | 3529372      | nc                         | rec    | intergenic |           |      |
| clone D | 3387189      | 3529392      | nc                         | rec    | intergenic |           |      |
| CFT073  | 3387191      | 3529394      | nc                         | rec    | intergenic |           |      |
| clone D | 3387217      | 3529420      | nc                         | rec    | intergenic |           |      |
| CFT073  | 3387225      | 3529427      | nc                         | rec    | intergenic |           |      |
| clone D | 3387309      | 3529511      | nc                         | rec    | intergenic |           |      |
| CFT073  | 3387347      | 3529549      | nc                         | rec    | intergenic |           |      |
| clone D | 3387354      | 3529556      | nc                         | rec    | intergenic |           |      |
| CFT073  | 3387355      | 3529557      | nc                         | rec    | intergenic |           |      |
| clone D | 3387358      | 3529560      | nc                         | rec    | intergenic |           |      |

| Lineage | Clone D site | CFT 073 site | mutation type <sup>a</sup> | recomb | Gene       | Gene name | Type |
|---------|--------------|--------------|----------------------------|--------|------------|-----------|------|
| CFT073  | 3387383      | 3529701      | nc                         | rec    | intergenic |           |      |
| clone D | 3387385      | 3529703      | nc                         | rec    | intergenic |           |      |
| clone D | 3387416      | 3529734      | nc                         | rec    | intergenic |           |      |
| CFT073  | 3387419      | 3529737      | nc                         | rec    | intergenic |           |      |
| clone D | 3387423      | 3529741      | nc                         | rec    | intergenic |           |      |
| CFT073  | 3387436      | 3529754      | nc                         | rec    | intergenic |           |      |
| CFT073  | 3387437      | 3529755      | nc                         | rec    | intergenic |           |      |
| clone D | 3387440      | 3529758      | nc                         | rec    | intergenic |           |      |
| CFT073  | 3387446      | 3529764      | nc                         | rec    | intergenic |           |      |
| clone D | 3387451      | 3529769      | nc                         | rec    | intergenic |           |      |
| CFT073  | 3387452      | 3529770      | nc                         | rec    | intergenic |           |      |
| clone D | 3387454      | 3529772      | nc                         | rec    | intergenic |           |      |
| CFT073  | 3387470      | 3529788      | nc                         | rec    | intergenic |           |      |
| clone D | 3387495      | 3529813      | nc                         | rec    | intergenic |           |      |
| clone D | 3387497      | 3529815      | nc                         | rec    | intergenic |           |      |
| clone D | 3387498      | 3529816      | nc                         | rec    | intergenic |           |      |
| clone D | 3387530      | 3529848      | nc                         | rec    | intergenic |           |      |
| CFT073  | 3387556      | 3529874      | nc                         | rec    | intergenic |           |      |
| clone D | 3387569      | 3529887      | nc                         | rec    | intergenic |           |      |
| clone D | 3387572      | 3529890      | nc                         | rec    | intergenic |           |      |
| clone D | 3387585      | 3529903      | nc                         | rec    | intergenic |           |      |
| clone D | 3387598      | 3529916      | nc                         | rec    | intergenic |           |      |
| CFT073  | 3387611      | 3529929      | nc                         | rec    | intergenic |           |      |
| clone D | 3387612      | 3529930      | nc                         | rec    | intergenic |           |      |
| clone D | 3387614      | 3529932      | nc                         | rec    | intergenic |           |      |
| clone D | 3387617      | 3529935      | nc                         | rec    | intergenic |           |      |
| clone D | 3387625      | 3529943      | nc                         | rec    | intergenic |           |      |
| clone D | 3387629      | 3529947      | nc                         | rec    | intergenic |           |      |
| clone D | 3387630      | 3529948      | nc                         | rec    | intergenic |           |      |
| CFT073  | 3387631      | 3529949      | nc                         | rec    | intergenic |           |      |
| CFT073  | 3387643      | 3529961      | nc                         | rec    | intergenic |           |      |
| CFT073  | 3387678      | 3529997      | nc                         | rec    | intergenic |           |      |
| CFT073  | 3387824      | 3530143      | nc                         | rec    | intergenic |           |      |
| clone D | 3387830      | 3530149      | nc                         | rec    | intergenic |           |      |
| CFT073  | 3387832      | 3530151      | nc                         | rec    | intergenic |           |      |
| clone D | 3387833      | 3530152      | nc                         | rec    | intergenic |           |      |
| CFT073  | 3387854      | 3530173      | nc                         | rec    | intergenic |           |      |
| CFT073  | 3387876      | 3530195      | nc                         | rec    | intergenic |           |      |
| CFT073  | 3387945      | 3530264      | nc                         | rec    | intergenic |           |      |
| CFT073  | 3387957      | 3530276      | nc                         | rec    | intergenic |           |      |
| clone D | 3388019      | 3530338      | nc                         | rec    | intergenic |           |      |
| clone D | 3388047      | 3530366      | nc                         | rec    | intergenic |           |      |
| clone D | 3388061      | 3530380      | nc                         | rec    | intergenic |           |      |
| clone D | 3388079      | 3530398      | nc                         | rec    | intergenic |           |      |
| clone D | 3388156      | 3530475      | s                          | rec    | i02_3379   | yghD      | CDS  |
| clone D | 3388172      | 3530491      | ns                         | rec    | i02_3379   | yghD      | CDS  |
| clone D | 3388180      | 3530499      | s                          | rec    | i02_3379   | yghD      | CDS  |
| clone D | 3388189      | 3530508      | s                          | rec    | i02_3379   | yghD      | CDS  |
| CFT073  | 3388199      | 3530518      | ns                         | rec    | i02_3379   | yghD      | CDS  |
| CFT073  | 3388201      | 3530520      | s                          | rec    | i02_3379   | yghD      | CDS  |
| CFT073  | 3388221      | 3530540      | ns                         | rec    | i02_3379   | yghD      | CDS  |

| Lineage | Clone D site | CFT 073 site | mutation type <sup>a</sup> | recomb | Gene       | Gene name | Type |
|---------|--------------|--------------|----------------------------|--------|------------|-----------|------|
| CFT073  | 3388234      | 3530553      | s                          | rec    | i02_3379   | yghD      | CDS  |
| CFT073  | 3388237      | 3530556      | s                          | rec    | i02_3379   | yghD      | CDS  |
| CFT073  | 3388249      | 3530568      | s                          | rec    | i02_3379   | yghD      | CDS  |
| CFT073  | 3388252      | 3530571      | ns                         | rec    | i02_3379   | yghD      | CDS  |
| clone D | 3388261      | 3530580      | ns                         | rec    | i02_3379   | yghD      | CDS  |
| clone D | 3388267      | 3530586      | s                          | rec    | i02_3379   | yghD      | CDS  |
| CFT073  | 3388324      | 3530643      | s                          | rec    | i02_3379   | yghD      | CDS  |
| CFT073  | 3388330      | 3530649      | s                          | rec    | i02_3379   | yghD      | CDS  |
| CFT073  | 3388342      | 3530661      | s                          | rec    | i02_3379   | yghD      | CDS  |
| clone D | 3388363      | 3530682      | s                          | rec    | i02_3379   | yghD      | CDS  |
| clone D | 3388388      | 3530707      | ns                         | rec    | i02_3379   | yghD      | CDS  |
| CFT073  | 3388425      | 3530744      | ns                         | rec    | i02_3379   | yghD      | CDS  |
| clone D | 3388432      | 3530751      | ns                         | rec    | i02_3379   | yghD      | CDS  |
| clone D | 3388434      | 3530753      | ns                         | rec    | i02_3379   | yghD      | CDS  |
| clone D | 3388498      | 3530817      | s                          | rec    | i02_3379   | yghD      | CDS  |
| clone D | 3388532      | 3530851      | ns                         | rec    | i02_3379   | yghD      | CDS  |
| clone D | 3388539      | 3530858      | ns                         | rec    | i02_3379   | yghD      | CDS  |
| clone D | 3388552      | 3530871      | ns                         | rec    | i02_3379   | yghD      | CDS  |
| clone D | 3388553      | 3530872      | ns                         | rec    | i02_3379   | yghD      | CDS  |
| clone D | 3388558      | 3530877      | s                          | rec    | i02_3379   | yghD      | CDS  |
| clone D | 3388585      | 3530904      | s                          | rec    | i02_3379   | yghD      | CDS  |
| clone D | 3388603      | 3530922      | s                          | rec    | i02_3379   | yghD      | CDS  |
| clone D | 3388608      | 3530927      | ns                         | rec    | i02_3379   | yghD      | CDS  |
| clone D | 3388787      | 3531106      | s                          | rec    | i02_3380   | gspL      | CDS  |
| CFT073  | 3388820      | 3531139      | s                          | rec    | i02_3380   | gspL      | CDS  |
| clone D | 3388876      | 3531195      | ns                         | rec    | i02_3380   | gspL      | CDS  |
| CFT073  | 3388908      | 3531227      | ns                         | rec    | i02_3380   | gspL      | CDS  |
| clone D | 3388930      | 3531249      | ns                         | rec    | i02_3380   | gspL      | CDS  |
| CFT073  | 3388975      | 3531294      | ns                         | rec    | i02_3380   | gspL      | CDS  |
| CFT073  | 3389010      | 3531329      | ns                         | rec    | i02_3380   | gspL      | CDS  |
| clone D | 3389100      | 3531419      | ns                         | rec    | i02_3380   | gspL      | CDS  |
| clone D | 3389174      | 3531493      | s                          | rec    | i02_3380   | gspL      | CDS  |
| clone D | 3389189      | 3531508      | s                          | rec    | i02_3380   | gspL      | CDS  |
| clone D | 3389192      | 3531511      | s                          | rec    | i02_3380   | gspL      | CDS  |
| clone D | 3389195      | 3531514      | s                          | rec    | i02_3380   | gspL      | CDS  |
| clone D | 3389246      | 3531565      | s                          | rec    | i02_3380   | gspL      | CDS  |
| clone D | 3389249      | 3531568      | s                          | rec    | i02_3380   | gspL      | CDS  |
| clone D | 3389267      | 3531585      | s                          | rec    | i02_3380   | gspL      | CDS  |
| clone D | 3389323      | 3531641      | ns                         | rec    | i02_3380   | gspL      | CDS  |
| clone D | 3389332      | 3531650      | ns                         | rec    | i02_3380   | gspL      | CDS  |
| clone D | 3389442      | 3531760      | ns                         | rec    | i02_3380   | gspL      | CDS  |
| clone D | 3389444      | 3531762      | s                          | rec    | i02_3380   | gspL      | CDS  |
| clone D | 3389468      | 3531786      | s                          | rec    | i02_3380   | gspL      | CDS  |
| clone D | 3389510      | 3531828      | s                          | rec    | i02_3380   | gspL      | CDS  |
| clone D | 3389522      | 3531840      | s                          | rec    | i02_3380   | gspL      | CDS  |
| clone D | 3389534      | 3531852      | s                          | rec    | i02_3380   | gspL      | CDS  |
| clone D | 3389546      | 3531864      | nc                         | rec    | intergenic |           |      |
| CFT073  | 3389585      | 3531903      | nc                         | rec    | intergenic |           |      |
| clone D | 3389609      | 3531927      | nc                         | rec    | intergenic |           |      |
| clone D | 3389642      | 3531960      | nc                         | rec    | intergenic |           |      |
| clone D | 3389662      | 3531980      | nc                         | rec    | intergenic |           |      |

| Lineage | Clone D site | CFT 073 site | mutation type <sup>a</sup> | recomb | Gene       | Gene name | Type |
|---------|--------------|--------------|----------------------------|--------|------------|-----------|------|
| clone D | 3389663      | 3531981      | nc                         | rec    | intergenic |           |      |
| clone D | 3389729      | 3532047      | nc                         | rec    | intergenic |           |      |
| CFT073  | 3389752      | 3532070      | nc                         | rec    | intergenic |           |      |
| CFT073  | 3389756      | 3532074      | nc                         | rec    | intergenic |           |      |
| clone D | 3389783      | 3532101      | nc                         | rec    | intergenic |           |      |
| clone D | 3389789      | 3532107      | nc                         | rec    | intergenic |           |      |
| clone D | 3389799      | 3532117      | nc                         | rec    | intergenic |           |      |
| clone D | 3389810      | 3532128      | nc                         | rec    | intergenic |           |      |
| clone D | 3389815      | 3532133      | nc                         | rec    | intergenic |           |      |
| clone D | 3389818      | 3532136      | nc                         | rec    | intergenic |           |      |
| clone D | 3389819      | 3532137      | nc                         | rec    | intergenic |           |      |
| clone D | 3389822      | 3532140      | nc                         | rec    | intergenic |           |      |
| clone D | 3389824      | 3532142      | nc                         | rec    | intergenic |           |      |
| clone D | 3389826      | 3532144      | nc                         | rec    | intergenic |           |      |
| clone D | 3389852      | 3532170      | nc                         | rec    | intergenic |           |      |
| CFT073  | 3389856      | 3532174      | nc                         | rec    | intergenic |           |      |
| clone D | 3389929      | 3532247      | ns                         | rec    | i02_3381   | /         | CDS  |
| clone D | 3389986      | 3532304      | ns                         | rec    | i02_3381   | /         | CDS  |
| clone D | 3390043      | 3532361      | ns                         | rec    | i02_3381   | /         | CDS  |
| clone D | 3390121      | 3532439      | ns                         | rec    | i02_3381   | /         | CDS  |
| clone D | 3390178      | 3532496      | ns                         | rec    | i02_3381   | /         | CDS  |
| clone D | 3390180      | 3532498      | ns                         | rec    | i02_3381   | /         | CDS  |
| clone D | 3390181      | 3532499      | ns                         | rec    | i02_3381   | /         | CDS  |
| clone D | 3390184      | 3532502      | ns                         | rec    | i02_3381   | /         | CDS  |
| clone D | 3390207      | 3532525      | ns                         | rec    | i02_3381   | /         | CDS  |
| clone D | 3390228      | 3532546      | ns                         | rec    | i02_3381   | /         | CDS  |
| clone D | 3390250      | 3532568      | ns                         | rec    | i02_3381   | /         | CDS  |
| CFT073  | 3390268      | 3532586      | ns                         | rec    | i02_3381   | /         | CDS  |
| clone D | 3405079      | 3534253      | nc                         | rec    | intergenic |           |      |
| clone D | 3405139      | 3534313      | s                          | rec    | i02_3395   | yghK      | CDS  |
| clone D | 3405142      | 3534316      | s                          | rec    | i02_3395   | yghK      | CDS  |
| clone D | 3405151      | 3534325      | s                          | rec    | i02_3395   | yghK      | CDS  |
| CFT073  | 3405196      | 3534370      | s                          | rec    | i02_3395   | yghK      | CDS  |
| clone D | 3405241      | 3534415      | s                          | rec    | i02_3395   | yghK      | CDS  |
| clone D | 3405244      | 3534418      | s                          | rec    | i02_3395   | yghK      | CDS  |
| clone D | 3405274      | 3534448      | s                          | rec    | i02_3395   | yghK      | CDS  |
| clone D | 3405292      | 3534466      | s                          | rec    | i02_3395   | yghK      | CDS  |
| clone D | 3405346      | 3534520      | s                          | rec    | i02_3395   | yghK      | CDS  |
| clone D | 3405352      | 3534526      | s                          | rec    | i02_3395   | yghK      | CDS  |
| clone D | 3405355      | 3534529      | s                          | rec    | i02_3395   | yghK      | CDS  |
| clone D | 3405358      | 3534532      | s                          | rec    | i02_3395   | yghK      | CDS  |
| clone D | 3405409      | 3534583      | s                          | rec    | i02_3395   | yghK      | CDS  |
| clone D | 3405412      | 3534586      | s                          | rec    | i02_3395   | yghK      | CDS  |
| clone D | 3405433      | 3534607      | s                          | rec    | i02_3395   | yghK      | CDS  |
| clone D | 3405463      | 3534637      | s                          | rec    | i02_3395   | yghK      | CDS  |
| CFT073  | 3405487      | 3534661      | s                          | rec    | i02_3395   | yghK      | CDS  |
| CFT073  | 3405490      | 3534664      | s                          | rec    | i02_3395   | yghK      | CDS  |
| CFT073  | 3405513      | 3534687      | s                          | rec    | i02_3395   | yghK      | CDS  |
| clone D | 3405559      | 3534733      | s                          | rec    | i02_3395   | yghK      | CDS  |
| clone D | 3405571      | 3534745      | s                          | rec    | i02_3395   | yghK      | CDS  |
| clone D | 3405576      | 3534750      | ns                         | rec    | i02_3395   | yghK      | CDS  |

| Lineage | Clone D site | CFT 073 site | mutation type <sup>a</sup> | recomb | Gene       | Gene name | Type |
|---------|--------------|--------------|----------------------------|--------|------------|-----------|------|
| CFT073  | 3405625      | 3534799      | s                          | rec    | i02_3395   | yghK      | CDS  |
| clone D | 3405631      | 3534805      | s                          | rec    | i02_3395   | yghK      | CDS  |
| clone D | 3405637      | 3534811      | s                          | rec    | i02_3395   | yghK      | CDS  |
| clone D | 3405658      | 3534832      | s                          | rec    | i02_3395   | yghK      | CDS  |
| clone D | 3405670      | 3534844      | s                          | rec    | i02_3395   | yghK      | CDS  |
| clone D | 3405673      | 3534847      | s                          | rec    | i02_3395   | yghK      | CDS  |
| clone D | 3405688      | 3534862      | s                          | rec    | i02_3395   | yghK      | CDS  |
| clone D | 3405700      | 3534874      | s                          | rec    | i02_3395   | yghK      | CDS  |
| clone D | 3405807      | 3534981      | s                          | rec    | i02_3395   | yghK      | CDS  |
| CFT073  | 3405912      | 3535086      | ns                         | rec    | i02_3395   | yghK      | CDS  |
| CFT073  | 3406465      | 3535639      | s                          | rec    | i02_3395   | yghK      | CDS  |
| clone D | 3406495      | 3535669      | s                          | rec    | i02_3395   | yghK      | CDS  |
| CFT073  | 3406631      | 3535805      | ns                         | rec    | i02_3395   | yghK      | CDS  |
| clone D | 3406768      | 3535942      | nc                         | rec    | intergenic |           |      |
| clone D | 3406950      | 3536124      | nc                         | rec    | intergenic |           |      |
| clone D | 3407250      | 3536424      | ns                         | rec    | i02_3396   | glcB      | CDS  |
| clone D | 3407346      | 3536520      | ns                         | rec    | i02_3396   | glcB      | CDS  |
| CFT073  | 3407419      | 3536593      | s                          | rec    | i02_3396   | glcB      | CDS  |
| clone D | 3407524      | 3536698      | s                          | rec    | i02_3396   | glcB      | CDS  |
| clone D | 3407548      | 3536722      | s                          | rec    | i02_3396   | glcB      | CDS  |
| clone D | 3407603      | 3536777      | ns                         | rec    | i02_3396   | glcB      | CDS  |
| clone D | 3407620      | 3536794      | s                          | rec    | i02_3396   | glcB      | CDS  |
| clone D | 3407671      | 3536845      | s                          | rec    | i02_3396   | glcB      | CDS  |
| clone D | 3407674      | 3536848      | s                          | rec    | i02_3396   | glcB      | CDS  |
| clone D | 3407680      | 3536854      | s                          | rec    | i02_3396   | glcB      | CDS  |
| clone D | 3407695      | 3536869      | s                          | rec    | i02_3396   | glcB      | CDS  |
| clone D | 3407715      | 3536889      | s                          | rec    | i02_3396   | glcB      | CDS  |
| clone D | 3407770      | 3536944      | s                          | rec    | i02_3396   | glcB      | CDS  |
| clone D | 3407791      | 3536965      | s                          | rec    | i02_3396   | glcB      | CDS  |
| clone D | 3407794      | 3536968      | s                          | rec    | i02_3396   | glcB      | CDS  |
| clone D | 3407797      | 3536971      | s                          | rec    | i02_3396   | glcB      | CDS  |
| clone D | 3407890      | 3537064      | s                          | rec    | i02_3396   | glcB      | CDS  |
| clone D | 3407962      | 3537136      | s                          | rec    | i02_3396   | glcB      | CDS  |
| clone D | 3408004      | 3537178      | s                          | rec    | i02_3396   | glcB      | CDS  |
| clone D | 3408066      | 3537240      | ns                         | rec    | i02_3396   | glcB      | CDS  |
| clone D | 3408072      | 3537246      | ns                         | rec    | i02_3396   | glcB      | CDS  |
| clone D | 3408291      | 3537465      | s                          | rec    | i02_3396   | glcB      | CDS  |
| clone D | 3408319      | 3537493      | s                          | rec    | i02_3396   | glcB      | CDS  |
| clone D | 3408331      | 3537505      | s                          | rec    | i02_3396   | glcB      | CDS  |
| clone D | 3408337      | 3537511      | ns                         | rec    | i02_3396   | glcB      | CDS  |
| clone D | 3408379      | 3537553      | s                          | rec    | i02_3396   | glcB      | CDS  |
| clone D | 3408382      | 3537556      | s                          | rec    | i02_3396   | glcB      | CDS  |
| clone D | 3408466      | 3537640      | s                          | rec    | i02_3396   | glcB      | CDS  |
| clone D | 3408526      | 3537700      | s                          | rec    | i02_3396   | glcB      | CDS  |
| CFT073  | 3408534      | 3537708      | ns                         | rec    | i02_3396   | glcB      | CDS  |
| clone D | 3408565      | 3537739      | s                          | rec    | i02_3396   | glcB      | CDS  |
| clone D | 3408571      | 3537745      | s                          | rec    | i02_3396   | glcB      | CDS  |
| clone D | 3408574      | 3537748      | s                          | rec    | i02_3396   | glcB      | CDS  |
| clone D | 3408586      | 3537760      | s                          | rec    | i02_3396   | glcB      | CDS  |
| clone D | 3408622      | 3537796      | ns                         | rec    | i02_3396   | glcB      | CDS  |
| clone D | 3408624      | 3537798      | ns                         | rec    | i02_3396   | glcB      | CDS  |



| Lineage | Clone D site | CFT 073 site | mutation type <sup>a</sup> | recomb | Gene       | Gene name | Type |
|---------|--------------|--------------|----------------------------|--------|------------|-----------|------|
| clone D | 3408649      | 3537823      | s                          | rec    | i02_3396   | glcB      | CDS  |
| clone D | 3408652      | 3537826      | s                          | rec    | i02_3396   | glcB      | CDS  |
| clone D | 3408655      | 3537829      | s                          | rec    | i02_3396   | glcB      | CDS  |
| CFT073  | 3408745      | 3537919      | s                          | rec    | i02_3396   | glcB      | CDS  |
| CFT073  | 3408909      | 3538083      | s                          | rec    | i02_3396   | glcB      | CDS  |
| clone D | 3408928      | 3538102      | s                          | rec    | i02_3396   | glcB      | CDS  |
| clone D | 3408976      | 3538150      | s                          | rec    | i02_3396   | glcB      | CDS  |
| ?       | 3408997      | 3538171      | s                          | rec    | i02_3396   | glcB      | CDS  |
| clone D | 3409001      | 3538175      | ns                         | rec    | i02_3396   | glcB      | CDS  |
| clone D | 3409003      | 3538177      | ns                         | rec    | i02_3396   | glcB      | CDS  |
| clone D | 3409006      | 3538180      | s                          | rec    | i02_3396   | glcB      | CDS  |
| clone D | 3409009      | 3538183      | s                          | rec    | i02_3396   | glcB      | CDS  |
| clone D | 3409012      | 3538186      | s                          | rec    | i02_3396   | glcB      | CDS  |
| clone D | 3409123      | 3538297      | s                          | rec    | i02_3396   | glcB      | CDS  |
| clone D | 3409144      | 3538318      | s                          | rec    | i02_3396   | glcB      | CDS  |
| clone D | 3409150      | 3538324      | s                          | rec    | i02_3396   | glcB      | CDS  |
| clone D | 3409176      | 3538350      | ns                         | rec    | i02_3396   | glcB      | CDS  |
| clone D | 3409181      | 3538355      | ns                         | rec    | i02_3396   | glcB      | CDS  |
| CFT073  | 3409186      | 3538360      | s                          | rec    | i02_3396   | glcB      | CDS  |
| clone D | 3409192      | 3538366      | s                          | rec    | i02_3396   | glcB      | CDS  |
| clone D | 3409198      | 3538372      | s                          | rec    | i02_3396   | glcB      | CDS  |
| clone D | 3409203      | 3538377      | s                          | rec    | i02_3396   | glcB      | CDS  |
| clone D | 3409204      | 3538378      | ns                         | rec    | i02_3396   | glcB      | CDS  |
| clone D | 3409205      | 3538379      | ns                         | rec    | i02_3396   | glcB      | CDS  |
| clone D | 3409207      | 3538381      | ns                         | rec    | i02_3396   | glcB      | CDS  |
| clone D | 3409208      | 3538382      | ns                         | rec    | i02_3396   | glcB      | CDS  |
| clone D | 3409209      | 3538383      | ns                         | rec    | i02_3396   | glcB      | CDS  |
| clone D | 3409210      | 3538384      | s                          | rec    | i02_3396   | glcB      | CDS  |
| clone D | 3409213      | 3538387      | s                          | rec    | i02_3396   | glcB      | CDS  |
| clone D | 3409254      | 3538428      | ns                         | rec    | i02_3396   | glcB      | CDS  |
| clone D | 3409296      | 3538470      | nc                         | rec    | intergenic |           |      |
| clone D | 3409432      | 3538606      | s                          | rec    | i02_3397   | glcG      | CDS  |
| clone D | 3409441      | 3538615      | s                          | rec    | i02_3397   | glcG      | CDS  |
| clone D | 3409443      | 3538617      | s                          | rec    | i02_3397   | glcG      | CDS  |
| clone D | 3409495      | 3538669      | s                          | rec    | i02_3397   | glcG      | CDS  |
| clone D | 3409639      | 3538813      | s                          | rec    | i02_3397   | glcG      | CDS  |
| clone D | 3409880      | 3539054      | s                          | rec    | i02_3398   | pir       | CDS  |
| CFT073  | 3410114      | 3539288      | s                          | rec    | i02_3398   | pir       | CDS  |
| CFT073  | 3410124      | 3539298      | ns                         | rec    | i02_3398   | pir       | CDS  |
| CFT073  | 3410192      | 3539366      | s                          | rec    | i02_3398   | pir       | CDS  |
| clone D | 3410195      | 3539369      | s                          | rec    | i02_3398   | pir       | CDS  |
| clone D | 3410204      | 3539378      | s                          | rec    | i02_3398   | pir       | CDS  |
| clone D | 3410207      | 3539381      | s                          | rec    | i02_3398   | pir       | CDS  |
| clone D | 3410216      | 3539390      | s                          | rec    | i02_3398   | pir       | CDS  |
| CFT073  | 3410456      | 3539630      | s                          | rec    | i02_3398   | pir       | CDS  |
| CFT073  | 3410480      | 3539654      | s                          | rec    | i02_3398   | pir       | CDS  |
| clone D | 3410675      | 3539849      | s                          | rec    | i02_3398   | pir       | CDS  |
| clone D | 3410756      | 3539930      | ns                         | rec    | i02_3398   | pir       | CDS  |
| CFT073  | 3410762      | 3539936      | s                          | rec    | i02_3398   | pir       | CDS  |
| clone D | 3410825      | 3539999      | s                          | rec    | i02_3398   | pir       | CDS  |
| clone D | 3410903      | 3540077      | s                          | rec    | i02_3398   | pir       | CDS  |

| Lineage | Clone D site | CFT 073 site | mutation type <sup>a</sup> | recomb | Gene     | Gene name | Type |
|---------|--------------|--------------|----------------------------|--------|----------|-----------|------|
| clone D | 3410927      | 3540101      | s                          | rec    | i02_3398 | pir       | CDS  |
| clone D | 3410934      | 3540108      | ns                         | rec    | i02_3398 | pir       | CDS  |
| clone D | 3410956      | 3540130      | s                          | rec    | i02_3399 | glcE      | CDS  |
| clone D | 3410961      | 3540135      | s                          | rec    | i02_3399 | glcE      | CDS  |
| clone D | 3410982      | 3540156      | s                          | rec    | i02_3399 | glcE      | CDS  |
| clone D | 3411000      | 3540174      | s                          | rec    | i02_3399 | glcE      | CDS  |
| clone D | 3411042      | 3540216      | s                          | rec    | i02_3399 | glcE      | CDS  |
| clone D | 3411060      | 3540234      | s                          | rec    | i02_3399 | glcE      | CDS  |
| clone D | 3411066      | 3540240      | s                          | rec    | i02_3399 | glcE      | CDS  |
| clone D | 3411099      | 3540273      | s                          | rec    | i02_3399 | glcE      | CDS  |
| clone D | 3411111      | 3540285      | s                          | rec    | i02_3399 | glcE      | CDS  |
| clone D | 3411129      | 3540303      | s                          | rec    | i02_3399 | glcE      | CDS  |
| clone D | 3411213      | 3540387      | s                          | rec    | i02_3399 | glcE      | CDS  |
| clone D | 3411222      | 3540396      | s                          | rec    | i02_3399 | glcE      | CDS  |
| CFT073  | 3411235      | 3540409      | ns                         | rec    | i02_3399 | glcE      | CDS  |
| clone D | 3411297      | 3540471      | s                          | rec    | i02_3399 | glcE      | CDS  |
| clone D | 3411312      | 3540486      | s                          | rec    | i02_3399 | glcE      | CDS  |
| clone D | 3411407      | 3540581      | s                          | rec    | i02_3399 | glcE      | CDS  |
| clone D | 3411408      | 3540582      | s                          | rec    | i02_3399 | glcE      | CDS  |
| clone D | 3411471      | 3540645      | s                          | rec    | i02_3399 | glcE      | CDS  |
| clone D | 3411479      | 3540653      | ns                         | rec    | i02_3399 | glcE      | CDS  |
| clone D | 3411486      | 3540660      | s                          | rec    | i02_3399 | glcE      | CDS  |
| clone D | 3411525      | 3540699      | s                          | rec    | i02_3399 | glcE      | CDS  |
| clone D | 3411528      | 3540702      | s                          | rec    | i02_3399 | glcE      | CDS  |
| clone D | 3411594      | 3540768      | s                          | rec    | i02_3399 | glcE      | CDS  |
| clone D | 3411699      | 3540873      | s                          | rec    | i02_3399 | glcE      | CDS  |
| clone D | 3411704      | 3540878      | ns                         | rec    | i02_3399 | glcE      | CDS  |
| clone D | 3411720      | 3540894      | s                          | rec    | i02_3399 | glcE      | CDS  |
| CFT073  | 3411738      | 3540912      | s                          | rec    | i02_3399 | glcE      | CDS  |
| CFT073  | 3411780      | 3540954      | s                          | rec    | i02_3399 | glcE      | CDS  |
| clone D | 3411813      | 3540987      | s                          | rec    | i02_3399 | glcE      | CDS  |
| CFT073  | 3411894      | 3541068      | s                          | rec    | i02_3399 | glcE      | CDS  |
| CFT073  | 3412028      | 3541202      | s                          | rec    | i02_3400 | glcD      | CDS  |
| CFT073  | 3412100      | 3541274      | s                          | rec    | i02_3400 | glcD      | CDS  |
| CFT073  | 3412103      | 3541277      | s                          | rec    | i02_3400 | glcD      | CDS  |
| clone D | 3412208      | 3541382      | s                          | rec    | i02_3400 | glcD      | CDS  |
| clone D | 3412274      | 3541448      | s                          | rec    | i02_3400 | glcD      | CDS  |
| CFT073  | 3412367      | 3541541      | s                          | rec    | i02_3400 | glcD      | CDS  |
| clone D | 3412421      | 3541595      | s                          | rec    | i02_3400 | glcD      | CDS  |
| CFT073  | 3412427      | 3541601      | s                          | rec    | i02_3400 | glcD      | CDS  |
| clone D | 3412430      | 3541604      | s                          | rec    | i02_3400 | glcD      | CDS  |
| clone D | 3412448      | 3541622      | s                          | rec    | i02_3400 | glcD      | CDS  |
| clone D | 3412466      | 3541640      | s                          | rec    | i02_3400 | glcD      | CDS  |
| clone D | 3412469      | 3541643      | s                          | rec    | i02_3400 | glcD      | CDS  |
| clone D | 3412472      | 3541646      | s                          | rec    | i02_3400 | glcD      | CDS  |
| clone D | 3412475      | 3541649      | s                          | rec    | i02_3400 | glcD      | CDS  |
| clone D | 3412478      | 3541652      | s                          | rec    | i02_3400 | glcD      | CDS  |
| clone D | 3412487      | 3541661      | s                          | rec    | i02_3400 | glcD      | CDS  |
| clone D | 3412490      | 3541664      | s                          | rec    | i02_3400 | glcD      | CDS  |
| clone D | 3412493      | 3541667      | s                          | rec    | i02_3400 | glcD      | CDS  |
| clone D | 3412499      | 3541673      | s                          | rec    | i02_3400 | glcD      | CDS  |

| Lineage | Clone D site | CFT 073 site | mutation type <sup>a</sup> | recomb | Gene       | Gene name | Type |
|---------|--------------|--------------|----------------------------|--------|------------|-----------|------|
| clone D | 3412631      | 3541805      | s                          | rec    | i02_3400   | glcD      | CDS  |
| clone D | 3412634      | 3541808      | s                          | rec    | i02_3400   | glcD      | CDS  |
| CFT073  | 3412649      | 3541823      | s                          | rec    | i02_3400   | glcD      | CDS  |
| clone D | 3412670      | 3541844      | s                          | rec    | i02_3400   | glcD      | CDS  |
| clone D | 3412685      | 3541859      | s                          | rec    | i02_3400   | glcD      | CDS  |
| clone D | 3412799      | 3541973      | s                          | rec    | i02_3400   | glcD      | CDS  |
| clone D | 3412834      | 3542008      | ns                         | rec    | i02_3400   | glcD      | CDS  |
| CFT073  | 3412877      | 3542051      | s                          | rec    | i02_3400   | glcD      | CDS  |
| CFT073  | 3412904      | 3542078      | s                          | rec    | i02_3400   | glcD      | CDS  |
| CFT073  | 3412925      | 3542099      | s                          | rec    | i02_3400   | glcD      | CDS  |
| CFT073  | 3412934      | 3542108      | s                          | rec    | i02_3400   | glcD      | CDS  |
| CFT073  | 3412943      | 3542117      | s                          | rec    | i02_3400   | glcD      | CDS  |
| CFT073  | 3412985      | 3542159      | s                          | rec    | i02_3400   | glcD      | CDS  |
| CFT073  | 3413006      | 3542180      | s                          | rec    | i02_3400   | glcD      | CDS  |
| CFT073  | 3413012      | 3542186      | s                          | rec    | i02_3400   | glcD      | CDS  |
| CFT073  | 3413024      | 3542198      | s                          | rec    | i02_3400   | glcD      | CDS  |
| CFT073  | 3413042      | 3542216      | s                          | rec    | i02_3400   | glcD      | CDS  |
| CFT073  | 3413063      | 3542237      | s                          | rec    | i02_3400   | glcD      | CDS  |
| CFT073  | 3413066      | 3542240      | s                          | rec    | i02_3400   | glcD      | CDS  |
| CFT073  | 3413072      | 3542246      | s                          | rec    | i02_3400   | glcD      | CDS  |
| CFT073  | 3413078      | 3542252      | s                          | rec    | i02_3400   | glcD      | CDS  |
| CFT073  | 3413093      | 3542267      | s                          | rec    | i02_3400   | glcD      | CDS  |
| clone D | 3413115      | 3542289      | ns                         | rec    | i02_3400   | glcD      | CDS  |
| CFT073  | 3413129      | 3542303      | s                          | rec    | i02_3400   | glcD      | CDS  |
| clone D | 3413144      | 3542318      | s                          | rec    | i02_3400   | glcD      | CDS  |
| CFT073  | 3413279      | 3542453      | s                          | rec    | i02_3400   | glcD      | CDS  |
| CFT073  | 3413300      | 3542474      | s                          | rec    | i02_3400   | glcD      | CDS  |
| CFT073  | 3413315      | 3542489      | s                          | rec    | i02_3400   | glcD      | CDS  |
| CFT073  | 3413549      | 3542723      | nc                         | rec    | intergenic |           |      |
| CFT073  | 3413660      | 3542834      | nc                         | rec    | intergenic |           |      |
| CFT073  | 3414107      | 3543281      | s                          | rec    | i02_3401   | glcC      | CDS  |
| clone D | 3414256      | 3543430      | ns                         | rec    | i02_3401   | glcC      | CDS  |
| CFT073  | 3414281      | 3543455      | s                          | rec    | i02_3401   | glcC      | CDS  |
| CFT073  | 3414296      | 3543470      | s                          | rec    | i02_3401   | glcC      | CDS  |
| CFT073  | 3414512      | 3543686      | ns                         | rec    | i02_3401   | glcC      | CDS  |
| CFT073  | 3414514      | 3543688      | ns                         | rec    | i02_3401   | glcC      | CDS  |
| CFT073  | 3414516      | 3543690      | ns                         | rec    | i02_3401   | glcC      | CDS  |
| CFT073  | 3414518      | 3543692      | ns                         | rec    | i02_3401   | glcC      | CDS  |
| CFT073  | 3414520      | 3543694      | s                          | rec    | i02_3401   | glcC      | CDS  |
| CFT073  | 3414521      | 3543695      | s                          | rec    | i02_3401   | glcC      | CDS  |
| CFT073  | 3414525      | 3543699      | nc                         | rec    | intergenic |           |      |
| CFT073  | 3414526      | 3543700      | nc                         | rec    | intergenic |           |      |
| CFT073  | 3414529      | 3543703      | ns                         | rec    | i02_3402   | yghO      | CDS  |
| clone D | 3414689      | 3543863      | s                          | rec    | i02_3402   | yghO      | CDS  |
| CFT073  | 3414729      | 3543903      | ns                         | rec    | i02_3402   | yghO      | CDS  |
| clone D | 3414777      | 3543951      | s                          | rec    | i02_3402   | yghO      | CDS  |
| clone D | 3414852      | 3544026      | ns                         | rec    | i02_3402   | yghO      | CDS  |
| CFT073  | 3414900      | 3544074      | ns                         | rec    | i02_3402   | yghO      | CDS  |
| clone D | 3414936      | 3544110      | ns                         | rec    | i02_3402   | yghO      | CDS  |
| CFT073  | 3415002      | 3544176      | ns                         | rec    | i02_3402   | yghO      | CDS  |
| CFT073  | 3415047      | 3544221      | ns                         | rec    | i02_3402   | yghO      | CDS  |

| Lineage | Clone D site | CFT 073 site | mutation type <sup>a</sup> | recomb | Gene       | Gene name | Type |
|---------|--------------|--------------|----------------------------|--------|------------|-----------|------|
| clone D | 3415074      | 3544248      | ns                         | rec    | i02_3402   | yghO      | CDS  |
| clone D | 3415077      | 3544251      | ns                         | rec    | i02_3402   | yghO      | CDS  |
| clone D | 3415175      | 3544349      | s                          | rec    | i02_3402   | yghO      | CDS  |
| clone D | 3415206      | 3544380      | ns                         | rec    | i02_3402   | yghO      | CDS  |
| clone D | 3415212      | 3544386      | ns                         | rec    | i02_3402   | yghO      | CDS  |
| clone D | 3415236      | 3544410      | ns                         | rec    | i02_3402   | yghO      | CDS  |
| clone D | 3415239      | 3544413      | ns                         | rec    | i02_3402   | yghO      | CDS  |
| ?       | 3415672      | 3544846      | ns                         | rec    | i02_3402   | yghO      | CDS  |
| ?       | 3415673      | 3544847      | ns                         | rec    | i02_3402   | yghO      | CDS  |
| CFT073  | 3415681      | 3544860      | nc                         | rec    | intergenic |           |      |
| clone D | 3415698      | 3544877      | nc                         | rec    | intergenic |           |      |
| CFT073  | 3415702      | 3544881      | nc                         | rec    | intergenic |           |      |
| CFT073  | 3415731      | 3544910      | nc                         | rec    | intergenic |           |      |
| clone D | 3415745      | 3544924      | nc                         | rec    | intergenic |           |      |
| clone D | 3415747      | 3544926      | nc                         | rec    | intergenic |           |      |
| clone D | 3415759      | 3544938      | nc                         | rec    | intergenic |           |      |
| ?       | 3415760      | 3544939      | nc                         | rec    | intergenic |           |      |
| CFT073  | 3415762      | 3544941      | nc                         | rec    | intergenic |           |      |
| clone D | 3415772      | 3544951      | nc                         | rec    | intergenic |           |      |
| clone D | 3415796      | 3544975      | nc                         | rec    | intergenic |           |      |
| clone D | 3415800      | 3544979      | nc                         | rec    | intergenic |           |      |
| clone D | 3415803      | 3544982      | nc                         | rec    | intergenic |           |      |
| clone D | 3415808      | 3544987      | nc                         | rec    | intergenic |           |      |
| clone D | 3415809      | 3544988      | nc                         | rec    | intergenic |           |      |
| clone D | 3415831      | 3545010      | nc                         | rec    | intergenic |           |      |
| clone D | 3415832      | 3545011      | nc                         | rec    | intergenic |           |      |
| clone D | 3415841      | 3545020      | nc                         | rec    | intergenic |           |      |
| clone D | 3415845      | 3545024      | nc                         | rec    | intergenic |           |      |
| clone D | 3415846      | 3545025      | nc                         | rec    | intergenic |           |      |
| clone D | 3415848      | 3545027      | nc                         | rec    | intergenic |           |      |
| clone D | 3415856      | 3545035      | nc                         | rec    | intergenic |           |      |
| CFT073  | 3415858      | 3545037      | nc                         | rec    | intergenic |           |      |
| clone D | 3415859      | 3545038      | nc                         | rec    | intergenic |           |      |
| clone D | 3415869      | 3545048      | nc                         | rec    | intergenic |           |      |
| clone D | 3415880      | 3545059      | nc                         | rec    | intergenic |           |      |
| clone D | 3415905      | 3545084      | nc                         | rec    | intergenic |           |      |
| clone D | 3415911      | 3545090      | nc                         | rec    | intergenic |           |      |
| CFT073  | 3415916      | 3545096      | nc                         | rec    | intergenic |           |      |
| CFT073  | 3415917      | 3545097      | nc                         | rec    | intergenic |           |      |
| clone D | 3415938      | 3545118      | nc                         | rec    | intergenic |           |      |
| clone D | 3415940      | 3545120      | nc                         | rec    | intergenic |           |      |
| clone D | 3415943      | 3545123      | nc                         | rec    | intergenic |           |      |
| CFT073  | 3415947      | 3545127      | nc                         | rec    | intergenic |           |      |
| CFT073  | 3416015      | 3545195      | nc                         | rec    | intergenic |           |      |
| CFT073  | 3416100      | 3545280      | s                          | rec    | i02_3403   | /         | CDS  |
| clone D | 3416118      | 3545298      | s                          | rec    | i02_3403   | /         | CDS  |
| clone D | 3416136      | 3545316      | s                          | rec    | i02_3403   | /         | CDS  |
| CFT073  | 3416202      | 3545382      | s                          | rec    | i02_3403   | /         | CDS  |
| CFT073  | 3416280      | 3545460      | s                          | rec    | i02_3403   | /         | CDS  |
| CFT073  | 3416288      | 3545468      | ns                         | rec    | i02_3403   | /         | CDS  |
| CFT073  | 3416292      | 3545472      | s                          | rec    | i02_3403   | /         | CDS  |

| Lineage | Clone D site | CFT 073 site | mutation type <sup>a</sup> | recomb | Gene     | Gene name | Type |
|---------|--------------|--------------|----------------------------|--------|----------|-----------|------|
| CFT073  | 3416361      | 3545541      | s                          | rec    | i02_3403 | /         | CDS  |
| CFT073  | 3416389      | 3545569      | s                          | rec    | i02_3403 | /         | CDS  |
| clone D | 3416397      | 3545577      | s                          | rec    | i02_3403 | /         | CDS  |
| CFT073  | 3416473      | 3545653      | ns                         | rec    | i02_3403 | /         | CDS  |
| clone D | 3416478      | 3545658      | s                          | rec    | i02_3403 | /         | CDS  |
| clone D | 3416541      | 3545721      | s                          | rec    | i02_3403 | /         | CDS  |
| clone D | 3416544      | 3545724      | s                          | rec    | i02_3403 | /         | CDS  |
| clone D | 3416556      | 3545736      | s                          | rec    | i02_3403 | /         | CDS  |
| clone D | 3416613      | 3545793      | s                          | rec    | i02_3403 | /         | CDS  |
| clone D | 3416616      | 3545796      | s                          | rec    | i02_3403 | /         | CDS  |
| clone D | 3416619      | 3545799      | s                          | rec    | i02_3403 | /         | CDS  |
| clone D | 3416622      | 3545802      | s                          | rec    | i02_3403 | /         | CDS  |
| clone D | 3416625      | 3545805      | s                          | rec    | i02_3403 | /         | CDS  |
| CFT073  | 3416664      | 3545844      | s                          | rec    | i02_3403 | /         | CDS  |
| clone D | 3416667      | 3545847      | s                          | rec    | i02_3403 | /         | CDS  |
| CFT073  | 3416841      | 3546021      | s                          | rec    | i02_3403 | /         | CDS  |
| CFT073  | 3416859      | 3546039      | s                          | rec    | i02_3403 | /         | CDS  |
| CFT073  | 3416952      | 3546132      | s                          | rec    | i02_3403 | /         | CDS  |
| CFT073  | 3416964      | 3546144      | s                          | rec    | i02_3403 | /         | CDS  |
| CFT073  | 3417019      | 3546199      | ns                         | rec    | i02_3403 | /         | CDS  |
| CFT073  | 3417089      | 3546269      | ns                         | rec    | i02_3403 | /         | CDS  |
| CFT073  | 3417132      | 3546312      | s                          | rec    | i02_3403 | /         | CDS  |
| CFT073  | 3417159      | 3546339      | s                          | rec    | i02_3403 | /         | CDS  |
| CFT073  | 3417162      | 3546342      | s                          | rec    | i02_3403 | /         | CDS  |
| CFT073  | 3417195      | 3546375      | s                          | rec    | i02_3403 | /         | CDS  |
| CFT073  | 3417207      | 3546387      | s                          | rec    | i02_3403 | /         | CDS  |
| CFT073  | 3417216      | 3546396      | s                          | rec    | i02_3403 | /         | CDS  |
| CFT073  | 3417239      | 3546419      | ns                         | rec    | i02_3403 | /         | CDS  |
| CFT073  | 3417243      | 3546423      | ns                         | rec    | i02_3403 | /         | CDS  |
| CFT073  | 3417246      | 3546426      | s                          | rec    | i02_3403 | /         | CDS  |
| CFT073  | 3417285      | 3546465      | s                          | rec    | i02_3403 | /         | CDS  |
| CFT073  | 3417291      | 3546471      | s                          | rec    | i02_3403 | /         | CDS  |
| CFT073  | 3417303      | 3546483      | s                          | rec    | i02_3403 | /         | CDS  |
| CFT073  | 3417369      | 3546549      | s                          | rec    | i02_3403 | /         | CDS  |
| CFT073  | 3417465      | 3546645      | s                          | rec    | i02_3403 | /         | CDS  |
| CFT073  | 3417468      | 3546648      | s                          | rec    | i02_3403 | /         | CDS  |
| CFT073  | 3417480      | 3546660      | s                          | rec    | i02_3403 | /         | CDS  |
| CFT073  | 3417569      | 3546749      | ns                         | rec    | i02_3404 | /         | CDS  |
| CFT073  | 3417600      | 3546780      | ns                         | rec    | i02_3404 | /         | CDS  |
| CFT073  | 3417603      | 3546783      | ns                         | rec    | i02_3404 | /         | CDS  |
| CFT073  | 3417627      | 3546807      | ns                         | rec    | i02_3404 | /         | CDS  |
| CFT073  | 3417635      | 3546815      | ns                         | rec    | i02_3404 | /         | CDS  |
| CFT073  | 3417672      | 3546852      | ns                         | rec    | i02_3404 | /         | CDS  |
| CFT073  | 3417739      | 3546919      | ns                         | rec    | i02_3404 | /         | CDS  |
| CFT073  | 3417815      | 3546995      | s                          | rec    | i02_3404 | /         | CDS  |
| CFT073  | 3417893      | 3547073      | s                          | rec    | i02_3404 | /         | CDS  |
| CFT073  | 3417920      | 3547100      | s                          | rec    | i02_3404 | /         | CDS  |
| CFT073  | 3417926      | 3547106      | s                          | rec    | i02_3404 | /         | CDS  |
| CFT073  | 3417935      | 3547115      | s                          | rec    | i02_3404 | /         | CDS  |
| CFT073  | 3417955      | 3547135      | ns                         | rec    | i02_3404 | /         | CDS  |
| CFT073  | 3417956      | 3547136      | ns                         | rec    | i02_3404 | /         | CDS  |

| Lineage | Clone D site | CFT 073 site | mutation type <sup>a</sup> | recomb | Gene     | Gene name | Type |
|---------|--------------|--------------|----------------------------|--------|----------|-----------|------|
| CFT073  | 3418004      | 3547184      | s                          | rec    | i02_3404 | /         | CDS  |
| CFT073  | 3418013      | 3547193      | s                          | rec    | i02_3404 | /         | CDS  |
| CFT073  | 3418046      | 3547226      | s                          | rec    | i02_3404 | /         | CDS  |
| CFT073  | 3418112      | 3547292      | s                          | rec    | i02_3404 | /         | CDS  |
| CFT073  | 3418124      | 3547304      | s                          | rec    | i02_3404 | /         | CDS  |
| CFT073  | 3418130      | 3547310      | ns                         | rec    | i02_3404 | /         | CDS  |
| CFT073  | 3418137      | 3547317      | ns                         | rec    | i02_3404 | /         | CDS  |
| CFT073  | 3418148      | 3547328      | s                          | rec    | i02_3404 | /         | CDS  |
| CFT073  | 3418154      | 3547334      | s                          | rec    | i02_3404 | /         | CDS  |
| CFT073  | 3418158      | 3547338      | ns                         | rec    | i02_3404 | /         | CDS  |
| CFT073  | 3418160      | 3547340      | ns                         | rec    | i02_3404 | /         | CDS  |
| CFT073  | 3418169      | 3547349      | s                          | rec    | i02_3404 | /         | CDS  |
| CFT073  | 3418182      | 3547362      | s                          | rec    | i02_3404 | /         | CDS  |
| CFT073  | 3418262      | 3547442      | s                          | rec    | i02_3404 | /         | CDS  |
| CFT073  | 3418280      | 3547460      | s                          | rec    | i02_3404 | /         | CDS  |
| CFT073  | 3418281      | 3547461      | ns                         | rec    | i02_3404 | /         | CDS  |
| CFT073  | 3418289      | 3547469      | ns                         | rec    | i02_3404 | /         | CDS  |
| clone D | 3418294      | 3547474      | ns                         | rec    | i02_3404 | /         | CDS  |
| CFT073  | 3418307      | 3547487      | s                          | rec    | i02_3404 | /         | CDS  |
| CFT073  | 3418322      | 3547502      | s                          | rec    | i02_3404 | /         | CDS  |
| CFT073  | 3418400      | 3547580      | s                          | rec    | i02_3404 | /         | CDS  |
| CFT073  | 3418460      | 3547640      | s                          | rec    | i02_3404 | /         | CDS  |
| CFT073  | 3418466      | 3547646      | s                          | rec    | i02_3404 | /         | CDS  |
| CFT073  | 3418469      | 3547649      | s                          | rec    | i02_3404 | /         | CDS  |
| CFT073  | 3418482      | 3547662      | ns                         | rec    | i02_3404 | /         | CDS  |
| CFT073  | 3418491      | 3547671      | ns                         | rec    | i02_3404 | /         | CDS  |
| clone D | 3418514      | 3547694      | s                          | rec    | i02_3404 | /         | CDS  |
| CFT073  | 3418520      | 3547700      | s                          | rec    | i02_3404 | /         | CDS  |
| CFT073  | 3418523      | 3547703      | s                          | rec    | i02_3404 | /         | CDS  |
| CFT073  | 3418529      | 3547709      | s                          | rec    | i02_3404 | /         | CDS  |
| CFT073  | 3418541      | 3547721      | s                          | rec    | i02_3404 | /         | CDS  |
| CFT073  | 3418550      | 3547730      | s                          | rec    | i02_3404 | /         | CDS  |
| CFT073  | 3418553      | 3547733      | s                          | rec    | i02_3404 | /         | CDS  |
| CFT073  | 3418562      | 3547742      | s                          | rec    | i02_3404 | /         | CDS  |
| clone D | 3418574      | 3547754      | s                          | rec    | i02_3404 | /         | CDS  |
| CFT073  | 3418577      | 3547757      | s                          | rec    | i02_3404 | /         | CDS  |
| clone D | 3418946      | 3548126      | ns                         | rec    | i02_3405 | /         | CDS  |
| CFT073  | 3419024      | 3548204      | s                          | rec    | i02_3406 | /         | CDS  |
| clone D | 3419075      | 3548255      | s                          | rec    | i02_3406 | /         | CDS  |
| CFT073  | 3419138      | 3548318      | s                          | rec    | i02_3406 | /         | CDS  |
| CFT073  | 3419142      | 3548322      | ns                         | rec    | i02_3406 | /         | CDS  |
| CFT073  | 3419156      | 3548336      | s                          | rec    | i02_3406 | /         | CDS  |
| CFT073  | 3419174      | 3548354      | s                          | rec    | i02_3406 | /         | CDS  |
| clone D | 3419177      | 3548357      | s                          | rec    | i02_3406 | /         | CDS  |
| clone D | 3419216      | 3548396      | s                          | rec    | i02_3406 | /         | CDS  |
| CFT073  | 3419222      | 3548402      | s                          | rec    | i02_3406 | /         | CDS  |
| clone D | 3419226      | 3548406      | ns                         | rec    | i02_3406 | /         | CDS  |
| clone D | 3419306      | 3548486      | s                          | rec    | i02_3406 | /         | CDS  |
| CFT073  | 3419393      | 3548573      | s                          | rec    | i02_3406 | /         | CDS  |
| CFT073  | 3419402      | 3548582      | s                          | rec    | i02_3406 | /         | CDS  |
| CFT073  | 3419423      | 3548603      | s                          | rec    | i02_3406 | /         | CDS  |

| Lineage | Clone D site | CFT 073 site | mutation type <sup>a</sup> | recomb | Gene       | Gene name | Type |
|---------|--------------|--------------|----------------------------|--------|------------|-----------|------|
| CFT073  | 3419426      | 3548606      | s                          | rec    | i02_3406   | /         | CDS  |
| CFT073  | 3419428      | 3548608      | ns                         | rec    | i02_3406   | /         | CDS  |
| CFT073  | 3419429      | 3548609      | ns                         | rec    | i02_3406   | /         | CDS  |
| CFT073  | 3419432      | 3548612      | ns                         | rec    | i02_3406   | /         | CDS  |
| CFT073  | 3419453      | 3548633      | s                          | rec    | i02_3406   | /         | CDS  |
| CFT073  | 3419486      | 3548666      | s                          | rec    | i02_3406   | /         | CDS  |
| CFT073  | 3419495      | 3548675      | s                          | rec    | i02_3406   | /         | CDS  |
| CFT073  | 3419498      | 3548678      | s                          | rec    | i02_3406   | /         | CDS  |
| CFT073  | 3419507      | 3548687      | s                          | rec    | i02_3406   | /         | CDS  |
| CFT073  | 3419529      | 3548709      | s                          | rec    | i02_3406   | /         | CDS  |
| CFT073  | 3419531      | 3548711      | s                          | rec    | i02_3406   | /         | CDS  |
| CFT073  | 3419534      | 3548714      | s                          | rec    | i02_3406   | /         | CDS  |
| clone D | 3419564      | 3548744      | s                          | rec    | i02_3406   | /         | CDS  |
| clone D | 3419567      | 3548747      | s                          | rec    | i02_3406   | /         | CDS  |
| clone D | 3419573      | 3548753      | s                          | rec    | i02_3406   | /         | CDS  |
| CFT073  | 3419588      | 3548768      | s                          | rec    | i02_3406   | /         | CDS  |
| clone D | 3419629      | 3548809      | ns                         | rec    | i02_3406   | /         | CDS  |
| clone D | 3419636      | 3548816      | s                          | rec    | i02_3406   | /         | CDS  |
| clone D | 3419639      | 3548819      | s                          | rec    | i02_3406   | /         | CDS  |
| clone D | 3419651      | 3548831      | s                          | rec    | i02_3406   | /         | CDS  |
| clone D | 3419654      | 3548834      | s                          | rec    | i02_3406   | /         | CDS  |
| clone D | 3419669      | 3548849      | s                          | rec    | i02_3406   | /         | CDS  |
| CFT073  | 3419819      | 3548999      | s                          | rec    | i02_3406   | /         | CDS  |
| CFT073  | 3419826      | 3549006      | ns                         | rec    | i02_3406   | /         | CDS  |
| CFT073  | 3419861      | 3549041      | s                          | rec    | i02_3406   | /         | CDS  |
| clone D | 3419879      | 3549059      | s                          | rec    | i02_3406   | /         | CDS  |
| CFT073  | 3419900      | 3549080      | s                          | rec    | i02_3406   | /         | CDS  |
| clone D | 3419901      | 3549081      | ns                         | rec    | i02_3406   | /         | CDS  |
| CFT073  | 3419933      | 3549113      | s                          | rec    | i02_3406   | /         | CDS  |
| CFT073  | 3419957      | 3549137      | ns                         | rec    | i02_3406   | /         | CDS  |
| CFT073  | 3420032      | 3549212      | s                          | rec    | i02_3406   | /         | CDS  |
| CFT073  | 3420068      | 3549248      | s                          | rec    | i02_3406   | /         | CDS  |
| clone D | 3420115      | 3549295      | ns                         | rec    | i02_3406   | /         | CDS  |
| CFT073  | 3420131      | 3549311      | nc                         | rec    | intergenic |           |      |
| CFT073  | 3420177      | 3549357      | ns                         | rec    | i02_3407   | /         | CDS  |
| CFT073  | 3420216      | 3549396      | ns                         | rec    | i02_3407   | /         | CDS  |
| CFT073  | 3420304      | 3549484      | s                          | rec    | i02_3407   | /         | CDS  |
| CFT073  | 3420316      | 3549496      | s                          | rec    | i02_3407   | /         | CDS  |
| CFT073  | 3420358      | 3549538      | s                          | rec    | i02_3407   | /         | CDS  |
| CFT073  | 3420397      | 3549577      | s                          | rec    | i02_3407   | /         | CDS  |
| CFT073  | 3420402      | 3549582      | s                          | rec    | i02_3407   | /         | CDS  |
| CFT073  | 3420514      | 3549694      | s                          | rec    | i02_3407   | /         | CDS  |
| CFT073  | 3420523      | 3549703      | s                          | rec    | i02_3407   | /         | CDS  |
| CFT073  | 3420540      | 3549720      | ns                         | rec    | i02_3407   | /         | CDS  |
| CFT073  | 3420555      | 3549735      | ns                         | rec    | i02_3407   | /         | CDS  |
| clone D | 3420573      | 3549753      | ns                         | rec    | i02_3407   | /         | CDS  |
| CFT073  | 3420577      | 3549757      | ns                         | rec    | i02_3407   | /         | CDS  |
| CFT073  | 3420578      | 3549758      | ns                         | rec    | i02_3407   | /         | CDS  |
| clone D | 3420587      | 3549767      | ns                         | rec    | i02_3407   | /         | CDS  |
| CFT073  | 3420649      | 3549829      | s                          | rec    | i02_3407   | /         | CDS  |
| CFT073  | 3420670      | 3549850      | s                          | rec    | i02_3407   | /         | CDS  |

| Lineage | Clone D site | CFT 073 site | mutation type <sup>a</sup> | recomb | Gene     | Gene name | Type |
|---------|--------------|--------------|----------------------------|--------|----------|-----------|------|
| clone D | 3420700      | 3549880      | s                          | rec    | i02_3407 | /         | CDS  |
| CFT073  | 3420706      | 3549886      | s                          | rec    | i02_3407 | /         | CDS  |
| CFT073  | 3420778      | 3549958      | s                          | rec    | i02_3407 | /         | CDS  |
| CFT073  | 3420790      | 3549970      | s                          | rec    | i02_3407 | /         | CDS  |
| CFT073  | 3420852      | 3550032      | s                          | rec    | i02_3407 | /         | CDS  |
| CFT073  | 3420865      | 3550045      | s                          | rec    | i02_3407 | /         | CDS  |
| CFT073  | 3420877      | 3550057      | ns                         | rec    | i02_3407 | /         | CDS  |
| clone D | 3420878      | 3550058      | ns                         | rec    | i02_3407 | /         | CDS  |
| CFT073  | 3420915      | 3550095      | s                          | rec    | i02_3407 | /         | CDS  |
| clone D | 3420922      | 3550102      | s                          | rec    | i02_3407 | /         | CDS  |
| CFT073  | 3420965      | 3550145      | ns                         | rec    | i02_3407 | /         | CDS  |
| clone D | 3421002      | 3550182      | s                          | rec    | i02_3407 | /         | CDS  |
| CFT073  | 3421009      | 3550189      | s                          | rec    | i02_3407 | /         | CDS  |
| CFT073  | 3421012      | 3550192      | s                          | rec    | i02_3407 | /         | CDS  |
| clone D | 3421021      | 3550201      | s                          | rec    | i02_3407 | /         | CDS  |
| CFT073  | 3421042      | 3550222      | s                          | rec    | i02_3407 | /         | CDS  |
| CFT073  | 3421078      | 3550258      | s                          | rec    | i02_3407 | /         | CDS  |
| CFT073  | 3421093      | 3550273      | s                          | rec    | i02_3407 | /         | CDS  |
| CFT073  | 3421120      | 3550300      | s                          | rec    | i02_3407 | /         | CDS  |
| CFT073  | 3421207      | 3550387      | s                          | rec    | i02_3407 | /         | CDS  |
| CFT073  | 3421225      | 3550405      | s                          | rec    | i02_3407 | /         | CDS  |
| CFT073  | 3421244      | 3550424      | ns                         | rec    | i02_3408 | /         | CDS  |
| CFT073  | 3421260      | 3550440      | ns                         | rec    | i02_3408 | /         | CDS  |
| clone D | 3421271      | 3550451      | ns                         | rec    | i02_3408 | /         | CDS  |
| CFT073  | 3421286      | 3550466      | ns                         | rec    | i02_3408 | /         | CDS  |
| CFT073  | 3421311      | 3550491      | ns                         | rec    | i02_3408 | /         | CDS  |
| CFT073  | 3421374      | 3550554      | s                          | rec    | i02_3408 | /         | CDS  |
| CFT073  | 3421394      | 3550574      | ns                         | rec    | i02_3408 | /         | CDS  |
| CFT073  | 3421415      | 3550595      | s                          | rec    | i02_3408 | /         | CDS  |
| CFT073  | 3421418      | 3550598      | s                          | rec    | i02_3408 | /         | CDS  |
| CFT073  | 3421434      | 3550614      | s                          | rec    | i02_3408 | /         | CDS  |
| CFT073  | 3421488      | 3550668      | s                          | rec    | i02_3408 | /         | CDS  |
| CFT073  | 3421506      | 3550686      | s                          | rec    | i02_3408 | /         | CDS  |
| CFT073  | 3421548      | 3550728      | s                          | rec    | i02_3408 | /         | CDS  |
| CFT073  | 3421569      | 3550749      | s                          | rec    | i02_3408 | /         | CDS  |
| CFT073  | 3421608      | 3550788      | s                          | rec    | i02_3408 | /         | CDS  |
| CFT073  | 3421614      | 3550794      | s                          | rec    | i02_3408 | /         | CDS  |
| CFT073  | 3421647      | 3550827      | s                          | rec    | i02_3408 | /         | CDS  |
| CFT073  | 3421667      | 3550847      | ns                         | rec    | i02_3408 | /         | CDS  |
| CFT073  | 3421677      | 3550857      | s                          | rec    | i02_3408 | /         | CDS  |
| CFT073  | 3421680      | 3550860      | s                          | rec    | i02_3408 | /         | CDS  |
| CFT073  | 3421686      | 3550866      | s                          | rec    | i02_3408 | /         | CDS  |
| CFT073  | 3421878      | 3551058      | s                          | rec    | i02_3408 | /         | CDS  |
| CFT073  | 3421902      | 3551082      | s                          | rec    | i02_3408 | /         | CDS  |
| CFT073  | 3421905      | 3551085      | s                          | rec    | i02_3408 | /         | CDS  |
| CFT073  | 3421938      | 3551118      | s                          | rec    | i02_3408 | /         | CDS  |
| clone D | 3421979      | 3551159      | s                          | rec    | i02_3408 | /         | CDS  |
| CFT073  | 3422013      | 3551193      | s                          | rec    | i02_3408 | /         | CDS  |
| CFT073  | 3422037      | 3551217      | s                          | rec    | i02_3408 | /         | CDS  |
| CFT073  | 3422070      | 3551250      | s                          | rec    | i02_3408 | /         | CDS  |
| clone D | 3422094      | 3551274      | ns                         | rec    | i02_3408 | /         | CDS  |



| Lineage | Clone D site | CFT 073 site | mutation type <sup>a</sup> | recomb | Gene       | Gene name | Type |
|---------|--------------|--------------|----------------------------|--------|------------|-----------|------|
| CFT073  | 3422095      | 3551275      | ns                         | rec    | i02_3408   | /         | CDS  |
| clone D | 3422100      | 3551280      | s                          | rec    | i02_3408   | /         | CDS  |
| CFT073  | 3422103      | 3551283      | s                          | rec    | i02_3408   | /         | CDS  |
| CFT073  | 3422117      | 3551297      | s                          | rec    | i02_3408   | /         | CDS  |
| CFT073  | 3422136      | 3551316      | s                          | rec    | i02_3408   | /         | CDS  |
| CFT073  | 3422310      | 3551490      | nc                         | rec    | intergenic |           |      |
| CFT073  | 3422332      | 3551512      | nc                         | rec    | intergenic |           |      |
| CFT073  | 3422363      | 3551543      | s                          | rec    | i02_3409   | /         | CDS  |
| CFT073  | 3422391      | 3551571      | s                          | rec    | i02_3409   | /         | CDS  |
| CFT073  | 3422422      | 3551602      | ns                         | rec    | i02_3409   | /         | CDS  |
| CFT073  | 3422438      | 3551618      | s                          | rec    | i02_3409   | /         | CDS  |
| CFT073  | 3422439      | 3551619      | s                          | rec    | i02_3409   | /         | CDS  |
| CFT073  | 3422469      | 3551649      | ns                         | rec    | i02_3409   | /         | CDS  |
| CFT073  | 3422470      | 3551650      | ns                         | rec    | i02_3409   | /         | CDS  |
| CFT073  | 3422488      | 3551668      | ns                         | rec    | i02_3409   | /         | CDS  |
| CFT073  | 3422490      | 3551670      | s                          | rec    | i02_3409   | /         | CDS  |
| CFT073  | 3422556      | 3551736      | s                          | rec    | i02_3409   | /         | CDS  |
| CFT073  | 3422601      | 3551781      | s                          | rec    | i02_3409   | /         | CDS  |
| CFT073  | 3422627      | 3551807      | ns                         | rec    | i02_3409   | /         | CDS  |
| CFT073  | 3422679      | 3551859      | s                          | rec    | i02_3409   | /         | CDS  |
| CFT073  | 3422688      | 3551868      | s                          | rec    | i02_3409   | /         | CDS  |
| CFT073  | 3422723      | 3551903      | ns                         | rec    | i02_3409   | /         | CDS  |
| CFT073  | 3422724      | 3551904      | s                          | rec    | i02_3409   | /         | CDS  |
| CFT073  | 3422808      | 3551988      | s                          | rec    | i02_3409   | /         | CDS  |
| CFT073  | 3422842      | 3552022      | ns                         | rec    | i02_3409   | /         | CDS  |
| CFT073  | 3422843      | 3552023      | ns                         | rec    | i02_3409   | /         | CDS  |
| CFT073  | 3422845      | 3552025      | ns                         | rec    | i02_3409   | /         | CDS  |
| CFT073  | 3422847      | 3552027      | s                          | rec    | i02_3409   | /         | CDS  |
| CFT073  | 3422850      | 3552030      | s                          | rec    | i02_3409   | /         | CDS  |
| CFT073  | 3422853      | 3552033      | s                          | rec    | i02_3409   | /         | CDS  |
| CFT073  | 3422862      | 3552042      | ns                         | rec    | i02_3409   | /         | CDS  |
| CFT073  | 3422863      | 3552043      | ns                         | rec    | i02_3409   | /         | CDS  |
| CFT073  | 3422864      | 3552044      | ns                         | rec    | i02_3409   | /         | CDS  |
| CFT073  | 3422868      | 3552048      | s                          | rec    | i02_3409   | /         | CDS  |
| CFT073  | 3422873      | 3552053      | s                          | rec    | i02_3409   | /         | CDS  |
| CFT073  | 3422874      | 3552054      | s                          | rec    | i02_3409   | /         | CDS  |
| CFT073  | 3422877      | 3552057      | ns                         | rec    | i02_3409   | /         | CDS  |
| CFT073  | 3422879      | 3552059      | ns                         | rec    | i02_3409   | /         | CDS  |
| CFT073  | 3422884      | 3552064      | ns                         | rec    | i02_3409   | /         | CDS  |
| CFT073  | 3422894      | 3552074      | ns                         | rec    | i02_3409   | /         | CDS  |
| CFT073  | 3422898      | 3552078      | s                          | rec    | i02_3410   | /         | CDS  |
| CFT073  | 3422909      | 3552089      | ns                         | rec    | i02_3410   | /         | CDS  |
| CFT073  | 3422915      | 3552095      | s                          | rec    | i02_3410   | /         | CDS  |
| CFT073  | 3422918      | 3552098      | s                          | rec    | i02_3410   | /         | CDS  |
| CFT073  | 3422930      | 3552110      | s                          | rec    | i02_3410   | /         | CDS  |
| CFT073  | 3422936      | 3552116      | s                          | rec    | i02_3410   | /         | CDS  |
| CFT073  | 3422942      | 3552122      | s                          | rec    | i02_3410   | /         | CDS  |
| CFT073  | 3422948      | 3552128      | s                          | rec    | i02_3410   | /         | CDS  |
| CFT073  | 3422984      | 3552164      | s                          | rec    | i02_3410   | /         | CDS  |
| CFT073  | 3422988      | 3552168      | ns                         | rec    | i02_3410   | /         | CDS  |
| CFT073  | 3422990      | 3552170      | s                          | rec    | i02_3410   | /         | CDS  |

| Lineage | Clone D site | CFT 073 site | mutation type <sup>a</sup> | recomb | Gene     | Gene name | Type |
|---------|--------------|--------------|----------------------------|--------|----------|-----------|------|
| CFT073  | 3422996      | 3552176      | ns                         | rec    | i02_3410 | /         | CDS  |
| CFT073  | 3423026      | 3552206      | s                          | rec    | i02_3410 | /         | CDS  |
| CFT073  | 3423032      | 3552212      | s                          | rec    | i02_3410 | /         | CDS  |
| CFT073  | 3423041      | 3552221      | s                          | rec    | i02_3410 | /         | CDS  |
| CFT073  | 3423059      | 3552239      | s                          | rec    | i02_3410 | /         | CDS  |
| CFT073  | 3423062      | 3552242      | s                          | rec    | i02_3410 | /         | CDS  |
| CFT073  | 3423068      | 3552248      | s                          | rec    | i02_3410 | /         | CDS  |
| CFT073  | 3423072      | 3552252      | ns                         | rec    | i02_3410 | /         | CDS  |
| CFT073  | 3423167      | 3552347      | s                          | rec    | i02_3410 | /         | CDS  |
| CFT073  | 3423170      | 3552350      | s                          | rec    | i02_3410 | /         | CDS  |
| CFT073  | 3423177      | 3552357      | ns                         | rec    | i02_3410 | /         | CDS  |
| CFT073  | 3423185      | 3552365      | s                          | rec    | i02_3410 | /         | CDS  |
| CFT073  | 3423204      | 3552384      | ns                         | rec    | i02_3410 | /         | CDS  |
| CFT073  | 3423206      | 3552386      | ns                         | rec    | i02_3410 | /         | CDS  |
| CFT073  | 3423208      | 3552388      | ns                         | rec    | i02_3410 | /         | CDS  |
| CFT073  | 3423218      | 3552398      | s                          | rec    | i02_3410 | /         | CDS  |
| CFT073  | 3423221      | 3552401      | s                          | rec    | i02_3410 | /         | CDS  |
| CFT073  | 3423224      | 3552404      | s                          | rec    | i02_3410 | /         | CDS  |
| CFT073  | 3423230      | 3552410      | s                          | rec    | i02_3410 | /         | CDS  |
| CFT073  | 3423238      | 3552418      | ns                         | rec    | i02_3410 | /         | CDS  |
| CFT073  | 3423240      | 3552420      | ns                         | rec    | i02_3410 | /         | CDS  |
| CFT073  | 3423242      | 3552422      | s                          | rec    | i02_3410 | /         | CDS  |
| CFT073  | 3423246      | 3552426      | ns                         | rec    | i02_3410 | /         | CDS  |
| CFT073  | 3423266      | 3552446      | s                          | rec    | i02_3410 | /         | CDS  |
| CFT073  | 3423283      | 3552463      | s                          | rec    | i02_3410 | /         | CDS  |
| CFT073  | 3423285      | 3552465      | ns                         | rec    | i02_3410 | /         | CDS  |
| CFT073  | 3423293      | 3552473      | s                          | rec    | i02_3410 | /         | CDS  |
| CFT073  | 3423296      | 3552476      | s                          | rec    | i02_3410 | /         | CDS  |
| CFT073  | 3423302      | 3552482      | s                          | rec    | i02_3410 | /         | CDS  |
| CFT073  | 3423310      | 3552490      | ns                         | rec    | i02_3410 | /         | CDS  |
| CFT073  | 3423311      | 3552491      | s                          | rec    | i02_3410 | /         | CDS  |
| CFT073  | 3423323      | 3552503      | s                          | rec    | i02_3410 | /         | CDS  |
| CFT073  | 3423330      | 3552510      | ns                         | rec    | i02_3410 | /         | CDS  |
| CFT073  | 3423365      | 3552545      | s                          | rec    | i02_3410 | /         | CDS  |
| CFT073  | 3423375      | 3552555      | ns                         | rec    | i02_3410 | /         | CDS  |
| CFT073  | 3423380      | 3552560      | s                          | rec    | i02_3410 | /         | CDS  |
| CFT073  | 3423455      | 3552635      | s                          | rec    | i02_3410 | /         | CDS  |
| CFT073  | 3423485      | 3552665      | s                          | rec    | i02_3410 | /         | CDS  |
| CFT073  | 3423497      | 3552677      | s                          | rec    | i02_3410 | /         | CDS  |
| CFT073  | 3423500      | 3552680      | ns                         | rec    | i02_3410 | /         | CDS  |
| CFT073  | 3423502      | 3552682      | ns                         | rec    | i02_3410 | /         | CDS  |
| CFT073  | 3423503      | 3552683      | s                          | rec    | i02_3410 | /         | CDS  |
| CFT073  | 3423521      | 3552701      | s                          | rec    | i02_3410 | /         | CDS  |
| CFT073  | 3423524      | 3552704      | s                          | rec    | i02_3410 | /         | CDS  |
| CFT073  | 3423533      | 3552713      | ns                         | rec    | i02_3410 | /         | CDS  |
| CFT073  | 3423535      | 3552715      | ns                         | rec    | i02_3410 | /         | CDS  |
| CFT073  | 3423559      | 3552739      | ns                         | rec    | i02_3410 | /         | CDS  |
| CFT073  | 3423563      | 3552743      | s                          | rec    | i02_3410 | /         | CDS  |
| CFT073  | 3423568      | 3552748      | ns                         | rec    | i02_3410 | /         | CDS  |
| CFT073  | 3423569      | 3552749      | s                          | rec    | i02_3410 | /         | CDS  |
| CFT073  | 3423580      | 3552760      | ns                         | rec    | i02_3410 | /         | CDS  |

| Lineage | Clone D site | CFT 073 site | mutation type <sup>a</sup> | recomb | Gene     | Gene name | Type |
|---------|--------------|--------------|----------------------------|--------|----------|-----------|------|
| CFT073  | 3423605      | 3552785      | s                          | rec    | i02_3410 | /         | CDS  |
| CFT073  | 3423632      | 3552812      | s                          | rec    | i02_3410 | /         | CDS  |
| CFT073  | 3423650      | 3552830      | s                          | rec    | i02_3410 | /         | CDS  |
| CFT073  | 3423665      | 3552845      | s                          | rec    | i02_3410 | /         | CDS  |
| CFT073  | 3423750      | 3552930      | ns                         | rec    | i02_3411 | yghQ      | CDS  |
| CFT073  | 3423753      | 3552933      | ns                         | rec    | i02_3411 | yghQ      | CDS  |
| CFT073  | 3423796      | 3552976      | s                          | rec    | i02_3411 | yghQ      | CDS  |
| CFT073  | 3423804      | 3552984      | s                          | rec    | i02_3411 | yghQ      | CDS  |
| CFT073  | 3423812      | 3552992      | ns                         | rec    | i02_3411 | yghQ      | CDS  |
| CFT073  | 3423817      | 3552997      | s                          | rec    | i02_3411 | yghQ      | CDS  |
| CFT073  | 3423847      | 3553027      | s                          | rec    | i02_3411 | yghQ      | CDS  |
| CFT073  | 3423850      | 3553030      | s                          | rec    | i02_3411 | yghQ      | CDS  |
| CFT073  | 3423853      | 3553033      | s                          | rec    | i02_3411 | yghQ      | CDS  |
| CFT073  | 3423862      | 3553042      | s                          | rec    | i02_3411 | yghQ      | CDS  |
| CFT073  | 3423973      | 3553153      | s                          | rec    | i02_3411 | yghQ      | CDS  |
| CFT073  | 3424141      | 3553321      | s                          | rec    | i02_3411 | yghQ      | CDS  |
| clone D | 3424160      | 3553340      | ns                         | rec    | i02_3411 | yghQ      | CDS  |
| CFT073  | 3424168      | 3553348      | s                          | rec    | i02_3411 | yghQ      | CDS  |
| CFT073  | 3424192      | 3553372      | s                          | rec    | i02_3411 | yghQ      | CDS  |
| CFT073  | 3424204      | 3553384      | s                          | rec    | i02_3411 | yghQ      | CDS  |
| CFT073  | 3424210      | 3553390      | s                          | rec    | i02_3411 | yghQ      | CDS  |
| CFT073  | 3424234      | 3553414      | s                          | rec    | i02_3411 | yghQ      | CDS  |
| CFT073  | 3424270      | 3553450      | s                          | rec    | i02_3411 | yghQ      | CDS  |
| CFT073  | 3424383      | 3553563      | ns                         | rec    | i02_3411 | yghQ      | CDS  |
| CFT073  | 3424431      | 3553611      | s                          | rec    | i02_3411 | yghQ      | CDS  |
| clone D | 3424539      | 3553719      | ns                         | rec    | i02_3411 | yghQ      | CDS  |
| clone D | 3424579      | 3553759      | s                          | rec    | i02_3411 | yghQ      | CDS  |
| clone D | 3424596      | 3553776      | s                          | rec    | i02_3411 | yghQ      | CDS  |
| clone D | 3424669      | 3553849      | s                          | rec    | i02_3411 | yghQ      | CDS  |
| CFT073  | 3424687      | 3553867      | s                          | rec    | i02_3411 | yghQ      | CDS  |
| clone D | 3424720      | 3553900      | s                          | rec    | i02_3411 | yghQ      | CDS  |
| clone D | 3424723      | 3553903      | s                          | rec    | i02_3411 | yghQ      | CDS  |
| clone D | 3424726      | 3553906      | s                          | rec    | i02_3411 | yghQ      | CDS  |
| CFT073  | 3424741      | 3553921      | s                          | rec    | i02_3411 | yghQ      | CDS  |
| CFT073  | 3424858      | 3554038      | s                          | rec    | i02_3411 | yghQ      | CDS  |
| clone D | 3424894      | 3554074      | s                          | rec    | i02_3411 | yghQ      | CDS  |
| CFT073  | 3424915      | 3554095      | s                          | rec    | i02_3411 | yghQ      | CDS  |
| CFT073  | 3424975      | 3554155      | s                          | rec    | i02_3411 | yghQ      | CDS  |
| CFT073  | 3424984      | 3554164      | s                          | rec    | i02_3411 | yghQ      | CDS  |
| CFT073  | 3424993      | 3554173      | s                          | rec    | i02_3411 | yghQ      | CDS  |
| CFT073  | 3425197      | 3554377      | s                          | rec    | i02_3412 | yghR      | CDS  |
| CFT073  | 3425206      | 3554386      | s                          | rec    | i02_3412 | yghR      | CDS  |
| CFT073  | 3425255      | 3554435      | ns                         | rec    | i02_3412 | yghR      | CDS  |
| clone D | 3425263      | 3554443      | s                          | rec    | i02_3412 | yghR      | CDS  |
| CFT073  | 3425323      | 3554503      | ns                         | rec    | i02_3412 | yghR      | CDS  |
| CFT073  | 3425335      | 3554515      | s                          | rec    | i02_3412 | yghR      | CDS  |
| CFT073  | 3425340      | 3554520      | s                          | rec    | i02_3412 | yghR      | CDS  |
| CFT073  | 3425347      | 3554527      | s                          | rec    | i02_3412 | yghR      | CDS  |
| CFT073  | 3425356      | 3554536      | s                          | rec    | i02_3412 | yghR      | CDS  |
| CFT073  | 3425359      | 3554539      | s                          | rec    | i02_3412 | yghR      | CDS  |
| CFT073  | 3425362      | 3554542      | s                          | rec    | i02_3412 | yghR      | CDS  |

| Lineage | Clone D site | CFT 073 site | mutation type <sup>a</sup> | recomb | Gene       | Gene name | Type |
|---------|--------------|--------------|----------------------------|--------|------------|-----------|------|
| CFT073  | 3425376      | 3554556      | ns                         | rec    | i02_3412   | yghR      | CDS  |
| CFT073  | 3425395      | 3554575      | s                          | rec    | i02_3412   | yghR      | CDS  |
| clone D | 3425411      | 3554591      | ns                         | rec    | i02_3412   | yghR      | CDS  |
| CFT073  | 3425455      | 3554635      | s                          | rec    | i02_3412   | yghR      | CDS  |
| CFT073  | 3425542      | 3554722      | s                          | rec    | i02_3412   | yghR      | CDS  |
| CFT073  | 3425656      | 3554836      | s                          | rec    | i02_3412   | yghR      | CDS  |
| CFT073  | 3425665      | 3554845      | s                          | rec    | i02_3412   | yghR      | CDS  |
| CFT073  | 3425770      | 3554950      | ns                         | rec    | i02_3412   | yghR      | CDS  |
| CFT073  | 3425771      | 3554951      | ns                         | rec    | i02_3412   | yghR      | CDS  |
| CFT073  | 3425773      | 3554953      | s                          | rec    | i02_3412   | yghR      | CDS  |
| CFT073  | 3425857      | 3555037      | ns                         | rec    | i02_3412   | yghR      | CDS  |
| CFT073  | 3425869      | 3555049      | s                          | rec    | i02_3412   | yghR      | CDS  |
| CFT073  | 3425892      | 3555072      | ns                         | rec    | i02_3412   | yghR      | CDS  |
| CFT073  | 3425972      | 3555152      | s                          | rec    | i02_3413   | yghS      | CDS  |
| CFT073  | 3425975      | 3555155      | ns                         | rec    | i02_3413   | yghS      | CDS  |
| CFT073  | 3425978      | 3555158      | s                          | rec    | i02_3413   | yghS      | CDS  |
| CFT073  | 3425981      | 3555161      | s                          | rec    | i02_3413   | yghS      | CDS  |
| CFT073  | 3426122      | 3555302      | s                          | rec    | i02_3413   | yghS      | CDS  |
| ?       | 3426134      | 3555314      | s                          | rec    | i02_3413   | yghS      | CDS  |
| CFT073  | 3426161      | 3555341      | s                          | rec    | i02_3413   | yghS      | CDS  |
| CFT073  | 3426230      | 3555410      | s                          | rec    | i02_3413   | yghS      | CDS  |
| CFT073  | 3426233      | 3555413      | s                          | rec    | i02_3413   | yghS      | CDS  |
| CFT073  | 3426276      | 3555456      | ns                         | rec    | i02_3413   | yghS      | CDS  |
| CFT073  | 3426288      | 3555468      | ns                         | rec    | i02_3413   | yghS      | CDS  |
| CFT073  | 3426350      | 3555530      | s                          | rec    | i02_3413   | yghS      | CDS  |
| CFT073  | 3426412      | 3555592      | s                          | rec    | i02_3413   | yghS      | CDS  |
| CFT073  | 3426443      | 3555623      | s                          | rec    | i02_3413   | yghS      | CDS  |
| CFT073  | 3426514      | 3555694      | ns                         | rec    | i02_3413   | yghS      | CDS  |
| CFT073  | 3426646      | 3555826      | nc                         | rec    | intergenic |           |      |
| clone D | 3426949      | 3556129      | s                          | rec    | i02_3414   | yghT      | CDS  |
| CFT073  | 3427051      | 3556231      | s                          | rec    | i02_3414   | yghT      | CDS  |
| clone D | 3427081      | 3556261      | s                          | rec    | i02_3414   | yghT      | CDS  |
| CFT073  | 3427613      | 3556793      | s                          | rec    | i02_3415   | pitB      | CDS  |
| CFT073  | 3427688      | 3556868      | s                          | rec    | i02_3415   | pitB      | CDS  |
| CFT073  | 3427694      | 3556874      | s                          | rec    | i02_3415   | pitB      | CDS  |
| CFT073  | 3428123      | 3557303      | s                          | rec    | i02_3415   | pitB      | CDS  |
| CFT073  | 3428285      | 3557465      | s                          | rec    | i02_3415   | pitB      | CDS  |
| CFT073  | 3428363      | 3557543      | s                          | rec    | i02_3415   | pitB      | CDS  |
| CFT073  | 3428372      | 3557552      | s                          | rec    | i02_3415   | pitB      | CDS  |
| CFT073  | 3428375      | 3557555      | s                          | rec    | i02_3415   | pitB      | CDS  |
| clone D | 3428465      | 3557645      | s                          | rec    | i02_3415   | pitB      | CDS  |
| clone D | 3428471      | 3557651      | s                          | rec    | i02_3415   | pitB      | CDS  |
| clone D | 3428474      | 3557654      | s                          | rec    | i02_3415   | pitB      | CDS  |
| clone D | 3428627      | 3557807      | s                          | rec    | i02_3415   | pitB      | CDS  |
| clone D | 3428630      | 3557810      | ns                         | rec    | i02_3415   | pitB      | CDS  |
| clone D | 3428631      | 3557811      | ns                         | rec    | i02_3415   | pitB      | CDS  |
| clone D | 3429193      | 3558373      | nc                         | rec    | intergenic |           |      |
| clone D | 3429216      | 3558396      | nc                         | rec    | intergenic |           |      |
| CFT073  | 3429305      | 3558485      | nc                         | rec    | intergenic |           |      |
| CFT073  | 3429321      | 3558501      | nc                         | rec    | intergenic |           |      |
| CFT073  | 3429409      | 3558589      | s                          | rec    | i02_3416   | gsp       | CDS  |

| Lineage | Clone D site | CFT 073 site | mutation type <sup>a</sup> | recomb | Gene     | Gene name | Type |
|---------|--------------|--------------|----------------------------|--------|----------|-----------|------|
| CFT073  | 3429410      | 3558590      | s                          | rec    | i02_3416 | gsp       | CDS  |
| CFT073  | 3429413      | 3558593      | s                          | rec    | i02_3416 | gsp       | CDS  |
| CFT073  | 3429416      | 3558596      | s                          | rec    | i02_3416 | gsp       | CDS  |
| CFT073  | 3429422      | 3558602      | s                          | rec    | i02_3416 | gsp       | CDS  |
| CFT073  | 3429428      | 3558608      | s                          | rec    | i02_3416 | gsp       | CDS  |
| CFT073  | 3429431      | 3558611      | s                          | rec    | i02_3416 | gsp       | CDS  |
| CFT073  | 3429437      | 3558617      | s                          | rec    | i02_3416 | gsp       | CDS  |
| CFT073  | 3429443      | 3558623      | s                          | rec    | i02_3416 | gsp       | CDS  |
| CFT073  | 3429449      | 3558629      | s                          | rec    | i02_3416 | gsp       | CDS  |
| CFT073  | 3429455      | 3558635      | s                          | rec    | i02_3416 | gsp       | CDS  |
| CFT073  | 3429458      | 3558638      | s                          | rec    | i02_3416 | gsp       | CDS  |
| CFT073  | 3429461      | 3558641      | s                          | rec    | i02_3416 | gsp       | CDS  |
| CFT073  | 3429476      | 3558656      | s                          | rec    | i02_3416 | gsp       | CDS  |
| CFT073  | 3429481      | 3558661      | s                          | rec    | i02_3416 | gsp       | CDS  |
| CFT073  | 3429482      | 3558662      | s                          | rec    | i02_3416 | gsp       | CDS  |
| clone D | 3429497      | 3558677      | s                          | rec    | i02_3416 | gsp       | CDS  |
| clone D | 3429500      | 3558680      | s                          | rec    | i02_3416 | gsp       | CDS  |
| clone D | 3429503      | 3558683      | s                          | rec    | i02_3416 | gsp       | CDS  |
| clone D | 3429512      | 3558692      | s                          | rec    | i02_3416 | gsp       | CDS  |
| clone D | 3429527      | 3558707      | s                          | rec    | i02_3416 | gsp       | CDS  |
| clone D | 3429533      | 3558713      | ns                         | rec    | i02_3416 | gsp       | CDS  |
| clone D | 3429535      | 3558715      | ns                         | rec    | i02_3416 | gsp       | CDS  |
| clone D | 3429536      | 3558716      | s                          | rec    | i02_3416 | gsp       | CDS  |
| CloneD  | 3429539      | 3558719      | s                          | rec    | i02_3416 | gsp       | CDS  |
| clone D | 3429563      | 3558743      | s                          | rec    | i02_3416 | gsp       | CDS  |
| clone D | 3429569      | 3558749      | s                          | rec    | i02_3416 | gsp       | CDS  |
| clone D | 3429575      | 3558755      | s                          | rec    | i02_3416 | gsp       | CDS  |
| clone D | 3429578      | 3558758      | s                          | rec    | i02_3416 | gsp       | CDS  |
| clone D | 3429587      | 3558767      | s                          | rec    | i02_3416 | gsp       | CDS  |
| clone D | 3429593      | 3558773      | s                          | rec    | i02_3416 | gsp       | CDS  |
| clone D | 3429758      | 3558938      | s                          | rec    | i02_3416 | gsp       | CDS  |
| clone D | 3429760      | 3558940      | s                          | rec    | i02_3416 | gsp       | CDS  |
| clone D | 3429763      | 3558943      | s                          | rec    | i02_3416 | gsp       | CDS  |
| clone D | 3429764      | 3558944      | s                          | rec    | i02_3416 | gsp       | CDS  |
| clone D | 3429770      | 3558950      | s                          | rec    | i02_3416 | gsp       | CDS  |
| clone D | 3429773      | 3558953      | s                          | rec    | i02_3416 | gsp       | CDS  |
| clone D | 3429779      | 3558959      | s                          | rec    | i02_3416 | gsp       | CDS  |
| clone D | 3429791      | 3558971      | s                          | rec    | i02_3416 | gsp       | CDS  |
| clone D | 3429797      | 3558977      | s                          | rec    | i02_3416 | gsp       | CDS  |
| CFT073  | 3429815      | 3558995      | s                          | rec    | i02_3416 | gsp       | CDS  |
| CFT073  | 3429818      | 3558998      | s                          | rec    | i02_3416 | gsp       | CDS  |
| CFT073  | 3429824      | 3559004      | s                          | rec    | i02_3416 | gsp       | CDS  |
| CFT073  | 3429836      | 3559016      | s                          | rec    | i02_3416 | gsp       | CDS  |
| CFT073  | 3429842      | 3559022      | s                          | rec    | i02_3416 | gsp       | CDS  |
| CFT073  | 3429845      | 3559025      | s                          | rec    | i02_3416 | gsp       | CDS  |
| CFT073  | 3429848      | 3559028      | s                          | rec    | i02_3416 | gsp       | CDS  |
| CFT073  | 3429857      | 3559037      | s                          | rec    | i02_3416 | gsp       | CDS  |
| CFT073  | 3429860      | 3559040      | s                          | rec    | i02_3416 | gsp       | CDS  |
| CFT073  | 3429884      | 3559064      | s                          | rec    | i02_3416 | gsp       | CDS  |
| CFT073  | 3429887      | 3559067      | s                          | rec    | i02_3416 | gsp       | CDS  |
| clone D | 3429950      | 3559130      | s                          | rec    | i02_3416 | gsp       | CDS  |

| Lineage | Clone D site | CFT 073 site | mutation type <sup>a</sup> | recomb | Gene       | Gene name | Type |
|---------|--------------|--------------|----------------------------|--------|------------|-----------|------|
| CFT073  | 3429952      | 3559132      | s                          | rec    | i02_3416   | gsp       | CDS  |
| clone D | 3429956      | 3559136      | s                          | rec    | i02_3416   | gsp       | CDS  |
| clone D | 3429986      | 3559166      | ns                         | rec    | i02_3416   | gsp       | CDS  |
| CFT073  | 3430010      | 3559190      | s                          | rec    | i02_3416   | gsp       | CDS  |
| CFT073  | 3430022      | 3559202      | s                          | rec    | i02_3416   | gsp       | CDS  |
| CFT073  | 3430025      | 3559205      | s                          | rec    | i02_3416   | gsp       | CDS  |
| CFT073  | 3430028      | 3559208      | s                          | rec    | i02_3416   | gsp       | CDS  |
| CFT073  | 3430064      | 3559244      | s                          | rec    | i02_3416   | gsp       | CDS  |
| CFT073  | 3430067      | 3559247      | s                          | rec    | i02_3416   | gsp       | CDS  |
| CFT073  | 3430082      | 3559262      | s                          | rec    | i02_3416   | gsp       | CDS  |
| CFT073  | 3430085      | 3559265      | s                          | rec    | i02_3416   | gsp       | CDS  |
| CFT073  | 3430106      | 3559286      | s                          | rec    | i02_3416   | gsp       | CDS  |
| CFT073  | 3430256      | 3559436      | s                          | rec    | i02_3416   | gsp       | CDS  |
| CFT073  | 3430268      | 3559448      | s                          | rec    | i02_3416   | gsp       | CDS  |
| CFT073  | 3430325      | 3559505      | s                          | rec    | i02_3416   | gsp       | CDS  |
| CFT073  | 3430330      | 3559510      | s                          | rec    | i02_3416   | gsp       | CDS  |
| CFT073  | 3430424      | 3559604      | s                          | rec    | i02_3416   | gsp       | CDS  |
| CFT073  | 3430472      | 3559652      | s                          | rec    | i02_3416   | gsp       | CDS  |
| CFT073  | 3430598      | 3559778      | s                          | rec    | i02_3416   | gsp       | CDS  |
| CFT073  | 3430601      | 3559781      | s                          | rec    | i02_3416   | gsp       | CDS  |
| CFT073  | 3430613      | 3559793      | s                          | rec    | i02_3416   | gsp       | CDS  |
| CFT073  | 3430853      | 3560033      | s                          | rec    | i02_3416   | gsp       | CDS  |
| CFT073  | 3430859      | 3560039      | s                          | rec    | i02_3416   | gsp       | CDS  |
| CFT073  | 3431413      | 3560593      | s                          | rec    | i02_3417   | yghU      | CDS  |
| CFT073  | 3431472      | 3560652      | ns                         | rec    | i02_3417   | yghU      | CDS  |
| CFT073  | 3431905      | 3561085      | s                          | rec    | i02_3417   | yghU      | CDS  |
| CFT073  | 3432043      | 3561223      | s                          | rec    | i02_3417   | yghU      | CDS  |
| CFT073  | 3432073      | 3561253      | s                          | rec    | i02_3417   | yghU      | CDS  |
| CFT073  | 3432079      | 3561259      | s                          | rec    | i02_3417   | yghU      | CDS  |
| CFT073  | 3432115      | 3561295      | s                          | rec    | i02_3417   | yghU      | CDS  |
| CFT073  | 3432118      | 3561298      | s                          | rec    | i02_3417   | yghU      | CDS  |
| CFT073  | 3432346      | 3561526      | nc                         | rec    | intergenic |           |      |
| CFT073  | 3432911      | 3562091      | s                          | rec    | i02_3419   | hypA      | CDS  |
| clone D | 3433060      | 3562240      | ns                         | rec    | i02_3420   | hybE      | CDS  |
| CFT073  | 3433194      | 3562374      | s                          | rec    | i02_3420   | hybE      | CDS  |
| CFT073  | 3433441      | 3562621      | ns                         | rec    | i02_3420   | hybE      | CDS  |
| clone D | 3433575      | 3562755      | ns                         | rec    | i02_3421   | hybD      | CDS  |
| clone D | 3433660      | 3562840      | s                          | rec    | i02_3421   | hybD      | CDS  |
| CFT073  | 3433831      | 3563011      | s                          | rec    | i02_3421   | hybD      | CDS  |
| CFT073  | 3434375      | 3563555      | ns                         | rec    | i02_3422   | hybC      | CDS  |
| CFT073  | 3434622      | 3563802      | s                          | rec    | i02_3422   | hybC      | CDS  |
| CFT073  | 3434625      | 3563805      | s                          | rec    | i02_3422   | hybC      | CDS  |
| clone D | 3434706      | 3563886      | s                          | rec    | i02_3422   | hybC      | CDS  |
| CFT073  | 3434863      | 3564043      | ns                         | rec    | i02_3422   | hybC      | CDS  |
| CFT073  | 3436040      | 3565220      | s                          | rec    | i02_3423   | hybB      | CDS  |
| clone D | 3436103      | 3565283      | s                          | rec    | i02_3423   | hybB      | CDS  |
| clone D | 3436292      | 3565472      | s                          | rec    | i02_3423   | hybB      | CDS  |
| clone D | 3436343      | 3565523      | s                          | rec    | i02_3423   | hybB      | CDS  |
| clone D | 3436378      | 3565558      | ns                         | rec    | i02_3423   | hybB      | CDS  |
| CFT073  | 3437256      | 3566436      | s                          | rec    | i02_3424   | hybA      | CDS  |
| CFT073  | 3437451      | 3566631      | s                          | rec    | i02_3424   | hybA      | CDS  |

| Lineage | Clone D site | CFT 073 site | mutation type <sup>a</sup> | recomb | Gene       | Gene name | Type |
|---------|--------------|--------------|----------------------------|--------|------------|-----------|------|
| CFT073  | 3438041      | 3567221      | s                          | rec    | i02_3425   | /         | CDS  |
| clone D | 3439896      | 3569076      | ns                         | rec    | i02_3428   | /         | CDS  |
| clone D | 3439897      | 3569077      | ns                         | rec    | i02_3428   | /         | CDS  |
| CFT073  | 3440016      | 3569196      | ns                         | rec    | i02_3428   | /         | CDS  |
| clone D | 3440066      | 3569246      | ns                         | rec    | i02_3428   | /         | CDS  |
| clone D | 3440067      | 3569247      | ns                         | rec    | i02_3428   | /         | CDS  |
| clone D | 3440150      | 3569330      | s                          | rec    | i02_3428   | /         | CDS  |
| clone D | 3440324      | 3569504      | s                          | rec    | i02_3428   | /         | CDS  |
| clone D | 3440341      | 3569521      | ns                         | rec    | i02_3428   | /         | CDS  |
| clone D | 3440415      | 3569595      | ns                         | rec    | i02_3428   | /         | CDS  |
| clone D | 3440423      | 3569603      | s                          | rec    | i02_3428   | /         | CDS  |
| clone D | 3440536      | 3569716      | nc                         | rec    | intergenic |           |      |
| clone D | 3440578      | 3569758      | nc                         | rec    | intergenic |           |      |
| clone D | 3440668      | 3569848      | s                          | rec    | i02_3429   | yghZ      | CDS  |
| clone D | 3441061      | 3570241      | s                          | rec    | i02_3429   | yghZ      | CDS  |
| CFT073  | 3441694      | 3570874      | s                          | rec    | i02_3430   | yqhA      | CDS  |
| CFT073  | 3442087      | 3571267      | ns                         | rec    | i02_3430   | yqhA      | CDS  |
| clone D | 3442357      | 3571537      | nc                         | rec    | intergenic |           |      |
| CFT073  | 3442992      | 3572172      | ns                         | rec    | i02_3431   | yghA      | CDS  |
| CFT073  | 3443723      | 3572903      | s                          | rec    | i02_3433   | exbB      | CDS  |
| CFT073  | 3443753      | 3572933      | s                          | rec    | i02_3433   | exbB      | CDS  |
| CFT073  | 3443794      | 3572974      | s                          | rec    | i02_3433   | exbB      | CDS  |
| CFT073  | 3443933      | 3573113      | s                          | rec    | i02_3433   | exbB      | CDS  |
| CFT073  | 3444193      | 3573373      | ns                         | rec    | i02_3433   | exbB      | CDS  |
| CFT073  | 3444268      | 3573448      | s                          | rec    | i02_3433   | exbB      | CDS  |
| CFT073  | 3444588      | 3573768      | s                          | rec    | i02_3434   | metC      | CDS  |
| CFT073  | 3444704      | 3573884      | ns                         | rec    | i02_3434   | metC      | CDS  |
| CFT073  | 3444727      | 3573907      | s                          | rec    | i02_3434   | metC      | CDS  |
| CFT073  | 3444759      | 3573939      | s                          | rec    | i02_3434   | metC      | CDS  |
| CFT073  | 3444816      | 3573996      | s                          | rec    | i02_3434   | metC      | CDS  |
| CFT073  | 3445368      | 3574548      | s                          | rec    | i02_3434   | metC      | CDS  |
| CFT073  | 3445473      | 3574653      | s                          | rec    | i02_3434   | metC      | CDS  |
| CFT073  | 3445476      | 3574656      | s                          | rec    | i02_3434   | metC      | CDS  |
| CFT073  | 3445479      | 3574659      | s                          | rec    | i02_3434   | metC      | CDS  |
| CFT073  | 3445482      | 3574662      | s                          | rec    | i02_3434   | metC      | CDS  |
| CFT073  | 3445485      | 3574665      | s                          | rec    | i02_3434   | metC      | CDS  |
| CFT073  | 3445486      | 3574666      | s                          | rec    | i02_3434   | metC      | CDS  |
| CFT073  | 3445491      | 3574671      | s                          | rec    | i02_3434   | metC      | CDS  |
| CFT073  | 3446192      | 3575372      | s                          | rec    | i02_3435   | yghB      | CDS  |
| CFT073  | 3446197      | 3575377      | s                          | rec    | i02_3435   | yghB      | CDS  |
| CFT073  | 3446575      | 3575755      | s                          | rec    | i02_3435   | yghB      | CDS  |
| CFT073  | 3447044      | 3576224      | s                          | rec    | i02_3436   | yqhC      | CDS  |
| CFT073  | 3447071      | 3576251      | s                          | rec    | i02_3436   | yqhC      | CDS  |
| clone D | 3447137      | 3576317      | s                          | rec    | i02_3436   | yqhC      | CDS  |
| clone D | 3447155      | 3576335      | s                          | rec    | i02_3436   | yqhC      | CDS  |
| clone D | 3447182      | 3576362      | s                          | rec    | i02_3436   | yqhC      | CDS  |
| clone D | 3447185      | 3576365      | s                          | rec    | i02_3436   | yqhC      | CDS  |
| clone D | 3447197      | 3576377      | s                          | rec    | i02_3436   | yqhC      | CDS  |
| clone D | 3447201      | 3576381      | ns                         | rec    | i02_3436   | yqhC      | CDS  |
| clone D | 3447230      | 3576410      | s                          | rec    | i02_3436   | yqhC      | CDS  |
| clone D | 3447239      | 3576419      | s                          | rec    | i02_3436   | yqhC      | CDS  |

| Lineage | Clone D site | CFT 073 site | mutation type <sup>a</sup> | recomb | Gene       | Gene name | Type |
|---------|--------------|--------------|----------------------------|--------|------------|-----------|------|
| clone D | 3447254      | 3576434      | s                          | rec    | i02_3436   | yqhC      | CDS  |
| clone D | 3447263      | 3576443      | s                          | rec    | i02_3436   | yqhC      | CDS  |
| clone D | 3447269      | 3576449      | s                          | rec    | i02_3436   | yqhC      | CDS  |
| clone D | 3447284      | 3576464      | ns                         | rec    | i02_3436   | yqhC      | CDS  |
| clone D | 3447398      | 3576578      | s                          | rec    | i02_3436   | yqhC      | CDS  |
| clone D | 3447401      | 3576581      | s                          | rec    | i02_3436   | yqhC      | CDS  |
| clone D | 3447410      | 3576590      | s                          | rec    | i02_3436   | yqhC      | CDS  |
| clone D | 3447413      | 3576593      | s                          | rec    | i02_3436   | yqhC      | CDS  |
| clone D | 3447455      | 3576635      | s                          | rec    | i02_3436   | yqhC      | CDS  |
| clone D | 3447995      | 3577175      | s                          | rec    | i02_3437   | yqhD      | CDS  |
| clone D | 3448070      | 3577250      | s                          | rec    | i02_3437   | yqhD      | CDS  |
| clone D | 3448079      | 3577259      | s                          | rec    | i02_3437   | yqhD      | CDS  |
| clone D | 3448082      | 3577262      | s                          | rec    | i02_3437   | yqhD      | CDS  |
| CFT073  | 3448133      | 3577313      | s                          | rec    | i02_3437   | yqhD      | CDS  |
| clone D | 3448190      | 3577370      | s                          | rec    | i02_3437   | yqhD      | CDS  |
| clone D | 3448371      | 3577551      | ns                         | rec    | i02_3437   | yqhD      | CDS  |
| clone D | 3448837      | 3578017      | ns                         | rec    | i02_3437   | yqhD      | CDS  |
| CFT073  | 3449337      | 3578517      | ns                         | rec    | i02_3438   | dkgA      | CDS  |
| clone D | 3449438      | 3578618      | ns                         | rec    | i02_3438   | dkgA      | CDS  |
| CFT073  | 3450138      | 3579318      | ns                         | rec    | i02_3439   | yqhG      | CDS  |
| clone D | 3450266      | 3579447      | s                          | rec    | i02_3439   | yqhG      | CDS  |
| clone D | 3450275      | 3579456      | s                          | rec    | i02_3439   | yqhG      | CDS  |
| CFT073  | 3450449      | 3579630      | s                          | rec    | i02_3439   | yqhG      | CDS  |
| CFT073  | 3452185      | 3581366      | s                          | rec    | i02_3441   | /         | CDS  |
| clone D | 3452197      | 3581378      | s                          | rec    | i02_3441   | /         | CDS  |
| clone D | 3452212      | 3581393      | s                          | rec    | i02_3441   | /         | CDS  |
| clone D | 3452281      | 3581462      | s                          | rec    | i02_3441   | /         | CDS  |
| CFT073  | 3453043      | 3582224      | s                          | rec    | i02_3441   | /         | CDS  |
| CFT073  | 3453049      | 3582230      | s                          | rec    | i02_3441   | /         | CDS  |
| CFT073  | 3453060      | 3582241      | s                          | rec    | i02_3441   | /         | CDS  |
| CFT073  | 3453064      | 3582245      | s                          | rec    | i02_3441   | /         | CDS  |
| CFT073  | 3453082      | 3582263      | s                          | rec    | i02_3441   | /         | CDS  |
| CFT073  | 3453172      | 3582353      | s                          | rec    | i02_3441   | /         | CDS  |
| CFT073  | 3453222      | 3582403      | ns                         | rec    | i02_3441   | /         | CDS  |
| CFT073  | 3453226      | 3582407      | s                          | rec    | i02_3441   | /         | CDS  |
| CFT073  | 3453399      | 3582580      | ns                         | rec    | i02_3441   | /         | CDS  |
| clone D | 3453490      | 3582671      | s                          | rec    | i02_3441   | /         | CDS  |
| clone D | 3453794      | 3582975      | nc                         | rec    | intergenic |           |      |
| clone D | 3453822      | 3583003      | nc                         | rec    | intergenic |           |      |
| CFT073  | 3455079      | 3584260      | s                          | rec    | i02_3443   | /         | CDS  |
| clone D | 3455085      | 3584266      | s                          | rec    | i02_3443   | /         | CDS  |
| CFT073  | 3455093      | 3584274      | ns                         | rec    | i02_3443   | /         | CDS  |
| CFT073  | 3455112      | 3584293      | s                          | rec    | i02_3443   | /         | CDS  |
| CFT073  | 3455223      | 3584404      | s                          | rec    | i02_3443   | /         | CDS  |
| CFT073  | 3455224      | 3584405      | ns                         | rec    | i02_3443   | /         | CDS  |
| CFT073  | 3455245      | 3584426      | ns                         | rec    | i02_3443   | /         | CDS  |
| CFT073  | 3455246      | 3584427      | ns                         | rec    | i02_3443   | /         | CDS  |
| CFT073  | 3455247      | 3584428      | ns                         | rec    | i02_3443   | /         | CDS  |
| CFT073  | 3455271      | 3584452      | ns                         | rec    | i02_3443   | /         | CDS  |
| CFT073  | 3455275      | 3584456      | s                          | rec    | i02_3443   | /         | CDS  |
| CFT073  | 3455278      | 3584459      | ns                         | rec    | i02_3443   | /         | CDS  |



| Lineage | Clone D site | CFT 073 site | mutation type <sup>a</sup> | recomb | Gene     | Gene name | Type |
|---------|--------------|--------------|----------------------------|--------|----------|-----------|------|
| CFT073  | 3455325      | 3584506      | s                          | rec    | i02_3443 | /         | CDS  |
| CFT073  | 3455331      | 3584512      | s                          | rec    | i02_3443 | /         | CDS  |
| CFT073  | 3455338      | 3584519      | ns                         | rec    | i02_3443 | /         | CDS  |
| CFT073  | 3455346      | 3584527      | s                          | rec    | i02_3443 | /         | CDS  |
| CFT073  | 3455349      | 3584530      | s                          | rec    | i02_3443 | /         | CDS  |
| CFT073  | 3455352      | 3584533      | s                          | rec    | i02_3443 | /         | CDS  |
| CFT073  | 3455377      | 3584558      | ns                         | rec    | i02_3443 | /         | CDS  |
| CFT073  | 3455408      | 3584589      | ns                         | rec    | i02_3443 | /         | CDS  |
| CFT073  | 3455412      | 3584593      | s                          | rec    | i02_3443 | /         | CDS  |
| CFT073  | 3455422      | 3584603      | ns                         | rec    | i02_3443 | /         | CDS  |
| CFT073  | 3455455      | 3584636      | ns                         | rec    | i02_3443 | /         | CDS  |
| CFT073  | 3455460      | 3584641      | s                          | rec    | i02_3443 | /         | CDS  |
| CFT073  | 3455475      | 3584656      | s                          | rec    | i02_3443 | /         | CDS  |
| CFT073  | 3455487      | 3584668      | s                          | rec    | i02_3443 | /         | CDS  |
| CFT073  | 3455520      | 3584701      | s                          | rec    | i02_3443 | /         | CDS  |
| clone D | 3455631      | 3584812      | s                          | rec    | i02_3443 | /         | CDS  |
| clone D | 3455718      | 3584899      | s                          | rec    | i02_3443 | /         | CDS  |
| clone D | 3455735      | 3584916      | ns                         | rec    | i02_3443 | /         | CDS  |
| clone D | 3455736      | 3584917      | ns                         | rec    | i02_3443 | /         | CDS  |
| clone D | 3455739      | 3584920      | s                          | rec    | i02_3443 | /         | CDS  |
| clone D | 3455745      | 3584926      | s                          | rec    | i02_3443 | /         | CDS  |
| clone D | 3455746      | 3584927      | ns                         | rec    | i02_3443 | /         | CDS  |
| clone D | 3455760      | 3584941      | s                          | rec    | i02_3443 | /         | CDS  |
| CFT073  | 3455761      | 3584942      | ns                         | rec    | i02_3443 | /         | CDS  |
| clone D | 3455820      | 3585001      | s                          | rec    | i02_3443 | /         | CDS  |
| clone D | 3455824      | 3585005      | ns                         | rec    | i02_3443 | /         | CDS  |
| clone D | 3455841      | 3585022      | s                          | rec    | i02_3443 | /         | CDS  |
| CFT073  | 3455868      | 3585049      | s                          | rec    | i02_3443 | /         | CDS  |
| CFT073  | 3455896      | 3585077      | ns                         | rec    | i02_3443 | /         | CDS  |
| CFT073  | 3455968      | 3585149      | ns                         | rec    | i02_3443 | /         | CDS  |
| CFT073  | 3455971      | 3585152      | ns                         | rec    | i02_3443 | /         | CDS  |
| CFT073  | 3455972      | 3585153      | ns                         | rec    | i02_3443 | /         | CDS  |
| clone D | 3456057      | 3585238      | s                          | rec    | i02_3443 | /         | CDS  |
| clone D | 3456075      | 3585256      | s                          | rec    | i02_3443 | /         | CDS  |
| clone D | 3456168      | 3585349      | ns                         | rec    | i02_3443 | /         | CDS  |
| clone D | 3456195      | 3585376      | s                          | rec    | i02_3443 | /         | CDS  |
| clone D | 3456210      | 3585391      | ns                         | rec    | i02_3443 | /         | CDS  |
| clone D | 3456214      | 3585395      | ns                         | rec    | i02_3443 | /         | CDS  |
| clone D | 3456494      | 3585675      | s                          | rec    | i02_3444 | /         | CDS  |
| CFT073  | 3456629      | 3585810      | s                          | rec    | i02_3444 | /         | CDS  |
| CFT073  | 3456630      | 3585811      | ns                         | rec    | i02_3444 | /         | CDS  |
| CFT073  | 3456631      | 3585812      | ns                         | rec    | i02_3444 | /         | CDS  |
| clone D | 3456942      | 3586123      | s                          | rec    | i02_3444 | /         | CDS  |
| clone D | 3457139      | 3586320      | s                          | rec    | i02_3444 | /         | CDS  |
| CFT073  | 3457284      | 3586465      | ns                         | rec    | i02_3444 | /         | CDS  |
| clone D | 3457338      | 3586519      | ns                         | rec    | i02_3444 | /         | CDS  |
| CFT073  | 3457400      | 3586581      | s                          | rec    | i02_3444 | /         | CDS  |
| clone D | 3457866      | 3587047      | s                          | rec    | i02_3445 | /         | CDS  |
| clone D | 3458790      | 3587971      | s                          | rec    | i02_3446 | /         | CDS  |
| clone D | 3458952      | 3588133      | s                          | rec    | i02_3446 | /         | CDS  |
| CFT073  | 3459219      | 3588400      | s                          | rec    | i02_3446 | /         | CDS  |

| Lineage | Clone D site | CFT 073 site | mutation type <sup>a</sup> | recomb | Gene       | Gene name | Type |
|---------|--------------|--------------|----------------------------|--------|------------|-----------|------|
| clone D | 3459249      | 3588430      | s                          | rec    | i02_3446   | /         | CDS  |
| clone D | 3459327      | 3588508      | s                          | rec    | i02_3446   | /         | CDS  |
| clone D | 3459707      | 3588888      | s                          | rec    | i02_3447   | /         | CDS  |
| clone D | 3459731      | 3588912      | s                          | rec    | i02_3447   | /         | CDS  |
| clone D | 3460485      | 3589666      | s                          | rec    | i02_3448   | ygiK      | CDS  |
| clone D | 3460642      | 3589823      | ns                         | rec    | i02_3448   | ygiK      | CDS  |
| CFT073  | 3460662      | 3589843      | s                          | rec    | i02_3448   | ygiK      | CDS  |
| CFT073  | 3460668      | 3589849      | s                          | rec    | i02_3448   | ygiK      | CDS  |
| clone D | 3460673      | 3589854      | ns                         | rec    | i02_3448   | ygiK      | CDS  |
| clone D | 3460674      | 3589855      | ns                         | rec    | i02_3448   | ygiK      | CDS  |
| clone D | 3460689      | 3589870      | s                          | rec    | i02_3448   | ygiK      | CDS  |
| ?       | 3460752      | 3589933      | s                          | rec    | i02_3448   | ygiK      | CDS  |
| CFT073  | 3460863      | 3590044      | s                          | rec    | i02_3448   | ygiK      | CDS  |
| CFT073  | 3460866      | 3590047      | s                          | rec    | i02_3448   | ygiK      | CDS  |
| CFT073  | 3461001      | 3590182      | s                          | rec    | i02_3448   | ygiK      | CDS  |
| CFT073  | 3461130      | 3590311      | s                          | rec    | i02_3448   | ygiK      | CDS  |
| CFT073  | 3461588      | 3590769      | s                          | rec    | i02_3449   | sufI      | CDS  |
| clone D | 3462221      | 3591402      | s                          | rec    | i02_3449   | sufI      | CDS  |
| CFT073  | 3462269      | 3591450      | s                          | rec    | i02_3449   | sufI      | CDS  |
| CFT073  | 3462314      | 3591495      | s                          | rec    | i02_3449   | sufI      | CDS  |
| CFT073  | 3462488      | 3591669      | s                          | rec    | i02_3449   | sufI      | CDS  |
| CFT073  | 3462539      | 3591720      | s                          | rec    | i02_3449   | sufI      | CDS  |
| CFT073  | 3462636      | 3591817      | ns                         | rec    | i02_3449   | sufI      | CDS  |
| CFT073  | 3463054      | 3592235      | s                          | rec    | i02_3450   | plsC      | CDS  |
| CFT073  | 3486515      | 3615696      | ns                         | out    | i02_3475   | tolC      | CDS  |
| clone D | 3508124      | 3637305      | ns                         | out    | i02_3495   | glnE      | CDS  |
| CFT073  | 3509103      | 3638284      | ns                         | out    | i02_3495   | glnE      | CDS  |
| CFT073  | 3529000      | 3658183      | ns                         | out    | i02_3519   | aer       | CDS  |
| clone D | 3536702      | 3665885      | s                          | out    | i02_3524   | ebgA      | CDS  |
| CFT073  | 3538980      | 3668163      | s                          | out    | i02_3527   | ygjI      | CDS  |
| CFT073  | 3546455      | 3675638      | s                          | out    | i02_3533   | ygjO      | CDS  |
| clone D | 3555708      | 3684891      | nc                         | out    | intergenic |           |      |
| CFT073  | 3555892      | 3685075      | nc                         | out    | intergenic |           |      |
| ?       | 3562222      | 3691404      | ns                         | out    | i02_3551   | yqjG      | CDS  |
| clone D | 3562224      | 3691406      | ns                         | out    | i02_3551   | yqjG      | CDS  |
| clone D | 3562225      | 3691407      | ns                         | out    | i02_3551   | yqjG      | CDS  |
| CFT073  | 3567137      | 3696321      | ns                         | rec    | i02_3557   | /         | CDS  |
| ?       | 3567155      | 3696339      | ns                         | rec    | i02_3557   | /         | CDS  |
| clone D | 3567156      | 3696340      | ns                         | rec    | i02_3557   | /         | CDS  |
| clone D | 3567159      | 3696343      | s                          | rec    | i02_3557   | /         | CDS  |
| clone D | 3577387      | 3706573      | nc                         | out    | intergenic |           |      |
| CFT073  | 3577761      | 3706947      | ns                         | out    | i02_3565   | tdcR      | CDS  |
| CFT073  | 3584797      | 3713983      | s                          | out    | i02_3573   | yhaG      | CDS  |
| CFT073  | 3588877      | 3718063      | ns                         | out    | i02_3579   | /         | CDS  |
| CFT073  | 3590882      | 3720068      | s                          | out    | i02_3581   | /         | CDS  |
| clone D | 3601227      | 3730413      | ns                         | out    | i02_3593   | yraO      | CDS  |
| CFT073  | 3603303      | 3732489      | ns                         | out    | i02_3596   | yraR      | CDS  |
| CFT073  | 3638598      | 3767785      | s                          | out    | i02_3631   | ispB      | CDS  |
| clone D | 3638601      | 3767788      | s                          | out    | i02_3631   | ispB      | CDS  |
| CFT073  | 3638947      | 3768134      | ns                         | out    | i02_3631   | ispB      | CDS  |
| CFT073  | 3652545      | 3781732      | nc                         | out    | intergenic |           |      |

| Lineage | Clone D site | CFT 073 site | mutation type <sup>a</sup> | recomb | Gene       | Gene name | Type |
|---------|--------------|--------------|----------------------------|--------|------------|-----------|------|
| CFT073  | 3658455      | 3787642      | nc                         | out    | intergenic |           |      |
| CFT073  | 3667542      | 3796729      | ns                         | out    | i02_3662   | nanT      | CDS  |
| CFT073  | 3669095      | 3798282      | ns                         | out    | i02_3663   | nanA      | CDS  |
| clone D | 3671503      | 3800690      | ns                         | out    | i02_3666   | sspA      | CDS  |
| CFT073  | 3696116      | 3825303      | ns                         | out    | i02_3690   | yhdA      | CDS  |
| clone D | 3696462      | 3825649      | ns                         | out    | i02_3690   | yhdA      | CDS  |
| CFT073  | 3699268      | 3828455      | nc                         | out    | intergenic |           |      |
| CFT073  | 3700920      | 3830107      | ns                         | out    | i02_3694   | accC      | CDS  |
| clone D | 3704606      | 3833793      | s                          | out    | i02_3698   | /         | CDS  |
| CFT073  | 3710481      | 3839665      | ns                         | out    | i02_3705   | panF      | CDS  |
| CFT073  | 3716028      | 3845212      | ns                         | out    | i02_3712   | envR      | CDS  |
| CFT073  | 3717679      | 3846863      | ns                         | out    | i02_3714   | acrF      | CDS  |
| CFT073  | 3726285      | 3855223      | nc                         | out    | intergenic |           |      |
| CFT073  | 3726400      | 3855338      | nc                         | rec    | 23s rRNA   | rrl       | rRNA |
| CFT073  | 3726403      | 3855341      | nc                         | rec    | 23s rRNA   | rrl       | rRNA |
| clone D | 3726406      | 3855344      | nc                         | rec    | 23s rRNA   | rrl       | rRNA |
| CFT073  | 3726408      | 3855346      | nc                         | rec    | 23s rRNA   | rrl       | rRNA |
| CFT073  | 3727656      | 3856593      | nc                         | rec    | 23s rRNA   | rrl       | rRNA |
| clone D | 3727657      | 3856594      | nc                         | rec    | 23s rRNA   | rrl       | rRNA |
| CFT073  | 3727698      | 3856635      | nc                         | rec    | 23s rRNA   | rrl       | rRNA |
| CFT073  | 3727974      | 3856911      | nc                         | rec    | 23s rRNA   | rrl       | rRNA |
| CFT073  | 3727975      | 3856912      | nc                         | rec    | 23s rRNA   | rrl       | rRNA |
| CFT073  | 3727984      | 3856921      | nc                         | rec    | 23s rRNA   | rrl       | rRNA |
| CFT073  | 3727985      | 3856922      | nc                         | rec    | 23s rRNA   | rrl       | rRNA |
| CFT073  | 3727993      | 3856930      | nc                         | rec    | 23s rRNA   | rrl       | rRNA |
| CFT073  | 3728026      | 3856963      | nc                         | rec    | 23s rRNA   | rrl       | rRNA |
| CFT073  | 3728032      | 3856970      | nc                         | rec    | 23s rRNA   | rrl       | rRNA |
| CFT073  | 3728651      | 3857589      | nc                         | rec    | 23s rRNA   | rrl       | rRNA |
| CFT073  | 3728653      | 3857591      | nc                         | rec    | 23s rRNA   | rrl       | rRNA |
| CFT073  | 3728654      | 3857592      | nc                         | rec    | 23s rRNA   | rrl       | rRNA |
| CFT073  | 3728655      | 3857593      | nc                         | rec    | 23s rRNA   | rrl       | rRNA |
| CFT073  | 3728660      | 3857598      | nc                         | rec    | 23s rRNA   | rrl       | rRNA |
| clone D | 3728845      | 3857784      | nc                         | rec    | 23s rRNA   | rrl       | rRNA |
| CFT073  | 3728846      | 3857785      | nc                         | rec    | 23s rRNA   | rrl       | rRNA |
| clone D | 3728886      | 3857825      | nc                         | rec    | 23s rRNA   | rrl       | rRNA |
| CFT073  | 3728938      | 3857877      | nc                         | rec    | 23s rRNA   | rrl       | rRNA |
| CFT073  | 3729119      | 3858058      | nc                         | rec    | 23s rRNA   | rrl       | rRNA |
| clone D | 3729224      | 3858165      | nc                         | rec    | intergenic |           |      |
| clone D | 3729225      | 3858166      | nc                         | rec    | intergenic |           |      |
| clone D | 3729271      | 3858201      | nc                         | rec    | intergenic |           |      |
| clone D | 3731286      | 3860228      | nc                         | out    | intergenic |           |      |
| CFT073  | 3734598      | 3863540      | ns                         | out    | i02_3727   | smg       | CDS  |
| clone D | 3744679      | 3873621      | ns                         | out    | i02_3741   | rpsM      | CDS  |
| clone D | 3784618      | 3913560      | ns                         | out    | i02_3799   | yheS      | CDS  |
| CFT073  | 3854455      | 3983398      | ns                         | out    | i02_3868   | /         | CDS  |
| CFT073  | 3863638      | 3992581      | ns                         | out    | i02_3879   | /         | CDS  |
| CFT073  | 3892161      | 4021104      | nc                         | out    | intergenic |           |      |
| CFT073  | 3922606      | 4051555      | ns                         | out    | i02_3937   | yhhT      | CDS  |
| clone D | 3928972      | 4057921      | ns                         | out    | i02_3946   | /         | CDS  |
| CFT073  | 3930175      | 4059124      | ns                         | out    | i02_3948   | /         | CDS  |
| clone D | 3935166      | 4064114      | ns                         | out    | i02_3954   | yhhJ      | CDS  |

| Lineage | Clone D site | CFT 073 site | mutation type <sup>a</sup> | recomb | Gene       | Gene name | Type       |
|---------|--------------|--------------|----------------------------|--------|------------|-----------|------------|
| CFT073  | 3957995      | 4086943      | s                          | out    | i02_3977   | chuA      | CDS        |
| clone D | 3961763      | 4090711      | ns                         | out    | i02_3982   | chuW      | CDS        |
| CFT073  | 3961856      | 4090804      | ns                         | out    | i02_3982   | chuW      | CDS        |
| clone D | 3975179      | 4104127      | ns                         | out    | i02_3996   | yhiX      | pseudogene |
| clone D | 3985397      | 4114345      | ns                         | out    | i02_4004   | yhjE      | CDS        |
| CFT073  | 4018418      | 4147366      | s                          | rec    | i02_4031   | /         | CDS        |
| CFT073  | 4018423      | 4147371      | ns                         | rec    | i02_4031   | /         | CDS        |
| CFT073  | 4018508      | 4147456      | nc                         | rec    | intergenic |           |            |
| clone D | 4018509      | 4147457      | nc                         | rec    | intergenic |           |            |
| CFT073  | 4018510      | 4147458      | nc                         | rec    | intergenic |           |            |
| CFT073  | 4018511      | 4147459      | nc                         | rec    | intergenic |           |            |
| CFT073  | 4018512      | 4147460      | nc                         | rec    | intergenic |           |            |
| clone D | 4018536      | 4147484      | nc                         | rec    | intergenic |           |            |
| CFT073  | 4034206      | 4163154      | s                          | rec    | i02_4047   | /         | CDS        |
| CFT073  | 4034217      | 4163165      | s                          | rec    | i02_4047   | /         | CDS        |
| CFT073  | 4034221      | 4163169      | s                          | rec    | i02_4047   | /         | CDS        |
| CFT073  | 4034252      | 4163200      | ns                         | rec    | i02_4047   | /         | CDS        |
| CFT073  | 4034303      | 4163251      | ns                         | rec    | i02_4047   | /         | CDS        |
| clone D | 4044235      | 4173183      | ns                         | out    | i02_4056   | xyIR      | CDS        |
| clone D | 4055331      | 4184279      | ns                         | out    | i02_4067   | yiaN      | CDS        |
| CFT073  | 4059433      | 4188381      | ns                         | out    | i02_4071   | sgbU      | CDS        |
| clone D | 4061881      | 4190829      | ns                         | out    | i02_4073   | aldB      | CDS        |
| clone D | 4068252      | 4197200      | s                          | out    | i02_4078   | yibF      | CDS        |
| clone D | 4071641      | 4200589      | ns                         | out    | i02_4081   | mtIA      | CDS        |
| clone D | 4072205      | 4201153      | ns                         | out    | i02_4081   | mtIA      | CDS        |
| CFT073  | 4091151      | 4220099      | ns                         | out    | i02_4101   | yibO      | CDS        |
| clone D | 4094205      | 4223153      | ns                         | out    | i02_4103   | yibQ      | CDS        |
| CFT073  | 4102115      | 4231063      | s                          | out    | i02_4110   | waaL      | CDS        |
| CFT073  | 4102133      | 4231081      | ns                         | out    | i02_4110   | waaL      | CDS        |
| clone D | 4118049      | 4246997      | ns                         | out    | i02_4129   | rph       | CDS        |
| CFT073  | 4119400      | 4248348      | ns                         | out    | i02_4130   | yicC      | CDS        |
| ?       | 4141078      | 4270026      | nc                         | out    | intergenic |           | CDS        |
| CFT073  | 4145453      | 4274403      | nc                         | rec    | intergenic |           |            |
| CFT073  | 4145454      | 4274404      | nc                         | rec    | intergenic |           |            |
| CFT073  | 4145455      | 4274405      | nc                         | rec    | intergenic |           |            |
| CFT073  | 4145457      | 4274407      | nc                         | rec    | intergenic |           |            |
| CFT073  | 4145476      | 4274426      | nc                         | rec    | intergenic |           |            |
| CFT073  | 4145484      | 4274434      | nc                         | rec    | intergenic |           |            |
| clone D | 4145489      | 4274438      | nc                         | rec    | intergenic |           |            |
| clone D | 4145491      | 4274440      | nc                         | rec    | intergenic |           |            |
| clone D | 4145505      | 4274454      | nc                         | rec    | intergenic |           |            |
| clone D | 4145514      | 4274463      | nc                         | rec    | intergenic |           |            |
| clone D | 4145515      | 4274464      | nc                         | rec    | intergenic |           |            |
| clone D | 4145519      | 4274468      | nc                         | rec    | intergenic |           |            |
| clone D | 4145523      | 4274472      | nc                         | rec    | intergenic |           |            |
| CFT073  | 4145529      | 4274478      | nc                         | rec    | intergenic |           |            |
| clone D | 4145540      | 4274489      | nc                         | rec    | intergenic |           |            |
| clone D | 4145547      | 4274496      | nc                         | rec    | intergenic |           |            |
| clone D | 4145551      | 4274500      | nc                         | rec    | intergenic |           |            |
| clone D | 4145552      | 4274501      | nc                         | rec    | intergenic |           |            |
| clone D | 4145561      | 4274510      | nc                         | rec    | intergenic |           |            |

| Lineage | Clone D site | CFT 073 site | mutation type <sup>a</sup> | recomb | Gene       | Gene name | Type |
|---------|--------------|--------------|----------------------------|--------|------------|-----------|------|
| clone D | 4145562      | 4274511      | nc                         | rec    | intergenic |           |      |
| CFT073  | 4145568      | 4274517      | nc                         | rec    | intergenic |           |      |
| clone D | 4145573      | 4274522      | nc                         | rec    | intergenic |           |      |
| clone D | 4145575      | 4274524      | nc                         | rec    | intergenic |           |      |
| clone D | 4145578      | 4274527      | nc                         | rec    | intergenic |           |      |
| clone D | 4145586      | 4274535      | nc                         | rec    | intergenic |           |      |
| clone D | 4145587      | 4274536      | nc                         | rec    | intergenic |           |      |
| clone D | 4145596      | 4274544      | nc                         | rec    | intergenic |           |      |
| clone D | 4145599      | 4274547      | nc                         | rec    | intergenic |           |      |
| clone D | 4145605      | 4274553      | nc                         | rec    | intergenic |           |      |
| clone D | 4145621      | 4274569      | nc                         | rec    | intergenic |           |      |
| clone D | 4145623      | 4274571      | nc                         | rec    | intergenic |           |      |
| clone D | 4145634      | 4274582      | nc                         | rec    | intergenic |           |      |
| clone D | 4145644      | 4274592      | nc                         | rec    | intergenic |           |      |
| clone D | 4145647      | 4274595      | nc                         | rec    | intergenic |           |      |
| clone D | 4145654      | 4274602      | nc                         | rec    | intergenic |           |      |
| clone D | 4145655      | 4274603      | nc                         | rec    | intergenic |           |      |
| clone D | 4145665      | 4274613      | nc                         | rec    | intergenic |           |      |
| clone D | 4145670      | 4274618      | nc                         | rec    | intergenic |           |      |
| clone D | 4145679      | 4274627      | nc                         | rec    | intergenic |           |      |
| clone D | 4145697      | 4274645      | nc                         | rec    | intergenic |           |      |
| clone D | 4145723      | 4274672      | nc                         | rec    | intergenic |           |      |
| clone D | 4145724      | 4274673      | nc                         | rec    | intergenic |           |      |
| clone D | 4145728      | 4274677      | nc                         | rec    | intergenic |           |      |
| clone D | 4145758      | 4274707      | s                          | rec    | i02_4154   | intC      | CDS  |
| clone D | 4145759      | 4274708      | s                          | rec    | i02_4154   | intC      | CDS  |
| clone D | 4145768      | 4274717      | ns                         | rec    | i02_4154   | intC      | CDS  |
| clone D | 4145770      | 4274719      | ns                         | rec    | i02_4154   | intC      | CDS  |
| clone D | 4145785      | 4274734      | s                          | rec    | i02_4154   | intC      | CDS  |
| clone D | 4145788      | 4274737      | s                          | rec    | i02_4154   | intC      | CDS  |
| clone D | 4145791      | 4274740      | s                          | rec    | i02_4154   | intC      | CDS  |
| clone D | 4145797      | 4274746      | ns                         | rec    | i02_4154   | intC      | CDS  |
| clone D | 4145800      | 4274749      | s                          | rec    | i02_4154   | intC      | CDS  |
| clone D | 4145812      | 4274761      | s                          | rec    | i02_4154   | intC      | CDS  |
| clone D | 4145819      | 4274768      | ns                         | rec    | i02_4154   | intC      | CDS  |
| clone D | 4145836      | 4274785      | s                          | rec    | i02_4154   | intC      | CDS  |
| clone D | 4145846      | 4274795      | ns                         | rec    | i02_4154   | intC      | CDS  |
| clone D | 4145857      | 4274806      | s                          | rec    | i02_4154   | intC      | CDS  |
| clone D | 4145869      | 4274818      | s                          | rec    | i02_4154   | intC      | CDS  |
| clone D | 4145884      | 4274833      | s                          | rec    | i02_4154   | intC      | CDS  |
| clone D | 4145893      | 4274842      | s                          | rec    | i02_4154   | intC      | CDS  |
| clone D | 4145905      | 4274854      | s                          | rec    | i02_4154   | intC      | CDS  |
| clone D | 4145917      | 4274866      | s                          | rec    | i02_4154   | intC      | CDS  |
| clone D | 4145935      | 4274884      | s                          | rec    | i02_4154   | intC      | CDS  |
| clone D | 4145941      | 4274890      | s                          | rec    | i02_4154   | intC      | CDS  |
| clone D | 4145947      | 4274896      | s                          | rec    | i02_4154   | intC      | CDS  |
| clone D | 4145972      | 4274921      | ns                         | rec    | i02_4154   | intC      | CDS  |
| clone D | 4145974      | 4274923      | ns                         | rec    | i02_4154   | intC      | CDS  |
| clone D | 4145977      | 4274926      | s                          | rec    | i02_4154   | intC      | CDS  |
| clone D | 4145980      | 4274929      | s                          | rec    | i02_4154   | intC      | CDS  |
| clone D | 4145986      | 4274935      | s                          | rec    | i02_4154   | intC      | CDS  |

| Lineage | Clone D site | CFT 073 site | mutation type <sup>a</sup> | recomb | Gene     | Gene name | Type |
|---------|--------------|--------------|----------------------------|--------|----------|-----------|------|
| clone D | 4145995      | 4274944      | s                          | rec    | i02_4154 | intC      | CDS  |
| clone D | 4145998      | 4274947      | s                          | rec    | i02_4154 | intC      | CDS  |
| clone D | 4146010      | 4274959      | s                          | rec    | i02_4154 | intC      | CDS  |
| clone D | 4146027      | 4274976      | ns                         | rec    | i02_4154 | intC      | CDS  |
| clone D | 4146038      | 4274987      | s                          | rec    | i02_4154 | intC      | CDS  |
| CFT073  | 4146041      | 4274990      | ns                         | rec    | i02_4154 | intC      | CDS  |
| clone D | 4146046      | 4274995      | s                          | rec    | i02_4154 | intC      | CDS  |
| clone D | 4146049      | 4274998      | s                          | rec    | i02_4154 | intC      | CDS  |
| clone D | 4146058      | 4275007      | s                          | rec    | i02_4154 | intC      | CDS  |
| clone D | 4146059      | 4275008      | ns                         | rec    | i02_4154 | intC      | CDS  |
| clone D | 4146070      | 4275019      | s                          | rec    | i02_4154 | intC      | CDS  |
| clone D | 4146076      | 4275025      | s                          | rec    | i02_4154 | intC      | CDS  |
| clone D | 4146082      | 4275031      | s                          | rec    | i02_4154 | intC      | CDS  |
| clone D | 4146094      | 4275043      | s                          | rec    | i02_4154 | intC      | CDS  |
| clone D | 4146124      | 4275073      | s                          | rec    | i02_4154 | intC      | CDS  |
| clone D | 4146127      | 4275076      | s                          | rec    | i02_4154 | intC      | CDS  |
| clone D | 4146142      | 4275091      | s                          | rec    | i02_4154 | intC      | CDS  |
| clone D | 4146145      | 4275094      | s                          | rec    | i02_4154 | intC      | CDS  |
| clone D | 4146157      | 4275106      | s                          | rec    | i02_4154 | intC      | CDS  |
| clone D | 4146160      | 4275109      | s                          | rec    | i02_4154 | intC      | CDS  |
| clone D | 4146175      | 4275124      | s                          | rec    | i02_4154 | intC      | CDS  |
| clone D | 4146181      | 4275130      | s                          | rec    | i02_4154 | intC      | CDS  |
| clone D | 4146193      | 4275142      | s                          | rec    | i02_4154 | intC      | CDS  |
| clone D | 4146194      | 4275143      | s                          | rec    | i02_4154 | intC      | CDS  |
| clone D | 4146211      | 4275160      | s                          | rec    | i02_4154 | intC      | CDS  |
| clone D | 4146214      | 4275163      | s                          | rec    | i02_4154 | intC      | CDS  |
| clone D | 4146220      | 4275169      | s                          | rec    | i02_4154 | intC      | CDS  |
| clone D | 4146226      | 4275175      | s                          | rec    | i02_4154 | intC      | CDS  |
| clone D | 4146232      | 4275181      | s                          | rec    | i02_4154 | intC      | CDS  |
| clone D | 4146256      | 4275205      | s                          | rec    | i02_4154 | intC      | CDS  |
| clone D | 4146271      | 4275220      | s                          | rec    | i02_4154 | intC      | CDS  |
| clone D | 4146292      | 4275241      | s                          | rec    | i02_4154 | intC      | CDS  |
| clone D | 4146299      | 4275248      | s                          | rec    | i02_4154 | intC      | CDS  |
| clone D | 4146301      | 4275250      | s                          | rec    | i02_4154 | intC      | CDS  |
| clone D | 4146304      | 4275253      | s                          | rec    | i02_4154 | intC      | CDS  |
| clone D | 4146316      | 4275265      | s                          | rec    | i02_4154 | intC      | CDS  |
| clone D | 4146319      | 4275268      | s                          | rec    | i02_4154 | intC      | CDS  |
| clone D | 4146334      | 4275283      | s                          | rec    | i02_4154 | intC      | CDS  |
| clone D | 4146337      | 4275286      | s                          | rec    | i02_4154 | intC      | CDS  |
| clone D | 4146364      | 4275313      | s                          | rec    | i02_4154 | intC      | CDS  |
| clone D | 4146370      | 4275319      | s                          | rec    | i02_4154 | intC      | CDS  |
| clone D | 4146379      | 4275328      | s                          | rec    | i02_4154 | intC      | CDS  |
| clone D | 4146391      | 4275340      | s                          | rec    | i02_4154 | intC      | CDS  |
| clone D | 4146400      | 4275349      | s                          | rec    | i02_4154 | intC      | CDS  |
| clone D | 4146424      | 4275373      | s                          | rec    | i02_4154 | intC      | CDS  |
| clone D | 4146430      | 4275379      | s                          | rec    | i02_4154 | intC      | CDS  |
| clone D | 4146436      | 4275385      | s                          | rec    | i02_4154 | intC      | CDS  |
| clone D | 4146445      | 4275394      | s                          | rec    | i02_4154 | intC      | CDS  |
| clone D | 4146469      | 4275418      | s                          | rec    | i02_4154 | intC      | CDS  |
| clone D | 4146475      | 4275424      | s                          | rec    | i02_4154 | intC      | CDS  |
| clone D | 4146478      | 4275427      | s                          | rec    | i02_4154 | intC      | CDS  |

| Lineage | Clone D site | CFT 073 site | mutation type <sup>a</sup> | recomb | Gene       | Gene name | Type |
|---------|--------------|--------------|----------------------------|--------|------------|-----------|------|
| clone D | 4146487      | 4275436      | s                          | rec    | i02_4154   | intC      | CDS  |
| clone D | 4146493      | 4275442      | s                          | rec    | i02_4154   | intC      | CDS  |
| clone D | 4146505      | 4275454      | s                          | rec    | i02_4154   | intC      | CDS  |
| clone D | 4146511      | 4275460      | s                          | rec    | i02_4154   | intC      | CDS  |
| clone D | 4146527      | 4275476      | s                          | rec    | i02_4154   | intC      | CDS  |
| clone D | 4146529      | 4275478      | s                          | rec    | i02_4154   | intC      | CDS  |
| clone D | 4146550      | 4275499      | s                          | rec    | i02_4154   | intC      | CDS  |
| clone D | 4146562      | 4275511      | s                          | rec    | i02_4154   | intC      | CDS  |
| clone D | 4146565      | 4275514      | s                          | rec    | i02_4154   | intC      | CDS  |
| clone D | 4146568      | 4275517      | s                          | rec    | i02_4154   | intC      | CDS  |
| clone D | 4146586      | 4275535      | s                          | rec    | i02_4154   | intC      | CDS  |
| clone D | 4146589      | 4275538      | s                          | rec    | i02_4154   | intC      | CDS  |
| clone D | 4146595      | 4275544      | s                          | rec    | i02_4154   | intC      | CDS  |
| clone D | 4146600      | 4275549      | ns                         | rec    | i02_4154   | intC      | CDS  |
| clone D | 4146604      | 4275553      | s                          | rec    | i02_4154   | intC      | CDS  |
| clone D | 4146610      | 4275559      | s                          | rec    | i02_4154   | intC      | CDS  |
| clone D | 4146622      | 4275571      | s                          | rec    | i02_4154   | intC      | CDS  |
| clone D | 4146625      | 4275574      | s                          | rec    | i02_4154   | intC      | CDS  |
| clone D | 4146640      | 4275589      | s                          | rec    | i02_4154   | intC      | CDS  |
| clone D | 4146643      | 4275592      | s                          | rec    | i02_4154   | intC      | CDS  |
| clone D | 4146655      | 4275604      | s                          | rec    | i02_4154   | intC      | CDS  |
| clone D | 4146661      | 4275610      | s                          | rec    | i02_4154   | intC      | CDS  |
| clone D | 4146673      | 4275622      | s                          | rec    | i02_4154   | intC      | CDS  |
| clone D | 4146676      | 4275625      | s                          | rec    | i02_4154   | intC      | CDS  |
| clone D | 4146679      | 4275628      | s                          | rec    | i02_4154   | intC      | CDS  |
| clone D | 4146691      | 4275640      | s                          | rec    | i02_4154   | intC      | CDS  |
| clone D | 4146692      | 4275641      | ns                         | rec    | i02_4154   | intC      | CDS  |
| clone D | 4146697      | 4275646      | s                          | rec    | i02_4154   | intC      | CDS  |
| clone D | 4146700      | 4275649      | s                          | rec    | i02_4154   | intC      | CDS  |
| clone D | 4146703      | 4275652      | s                          | rec    | i02_4154   | intC      | CDS  |
| clone D | 4146706      | 4275655      | s                          | rec    | i02_4154   | intC      | CDS  |
| clone D | 4146715      | 4275664      | s                          | rec    | i02_4154   | intC      | CDS  |
| clone D | 4146724      | 4275673      | s                          | rec    | i02_4154   | intC      | CDS  |
| clone D | 4146727      | 4275676      | s                          | rec    | i02_4154   | intC      | CDS  |
| clone D | 4146730      | 4275679      | s                          | rec    | i02_4154   | intC      | CDS  |
| clone D | 4146733      | 4275682      | s                          | rec    | i02_4154   | intC      | CDS  |
| clone D | 4146736      | 4275685      | s                          | rec    | i02_4154   | intC      | CDS  |
| clone D | 4146749      | 4275698      | s                          | rec    | i02_4154   | intC      | CDS  |
| clone D | 4146751      | 4275700      | s                          | rec    | i02_4154   | intC      | CDS  |
| clone D | 4146757      | 4275706      | s                          | rec    | i02_4154   | intC      | CDS  |
| clone D | 4146766      | 4275715      | s                          | rec    | i02_4154   | intC      | CDS  |
| clone D | 4146779      | 4275728      | ns                         | rec    | i02_4154   | intC      | CDS  |
| clone D | 4146790      | 4275739      | s                          | rec    | i02_4154   | intC      | CDS  |
| clone D | 4146793      | 4275742      | s                          | rec    | i02_4154   | intC      | CDS  |
| clone D | 4146796      | 4275745      | s                          | rec    | i02_4154   | intC      | CDS  |
| clone D | 4146807      | 4275756      | ns                         | rec    | i02_4154   | intC      | CDS  |
| ?       | 4163785      | 4341851      | nc                         | rec    | intergenic |           |      |
| clone D | 4163807      | 4341873      | nc                         | rec    | intergenic |           |      |
| clone D | 4163808      | 4341874      | nc                         | rec    | intergenic |           |      |
| ?       | 4163809      | 4341875      | nc                         | rec    | intergenic |           |      |
| CFT073  | 4163816      | 4341882      | nc                         | rec    | intergenic |           |      |

| Lineage | Clone D site | CFT 073 site | mutation type <sup>a</sup> | recomb | Gene       | Gene name | Type |
|---------|--------------|--------------|----------------------------|--------|------------|-----------|------|
| clone D | 4163819      | 4341885      | nc                         | rec    | intergenic |           |      |
| clone D | 4163826      | 4341892      | nc                         | rec    | intergenic |           |      |
| ?       | 4163828      | 4341894      | nc                         | rec    | intergenic |           |      |
| CFT073  | 4163836      | 4341902      | nc                         | rec    | intergenic |           |      |
| CFT073  | 4163838      | 4341904      | nc                         | rec    | intergenic |           |      |
| CFT073  | 4163845      | 4341911      | nc                         | rec    | intergenic |           |      |
| CFT073  | 4163846      | 4341912      | nc                         | rec    | intergenic |           |      |
| CFT073  | 4163847      | 4341913      | nc                         | rec    | intergenic |           |      |
| CFT073  | 4163850      | 4341916      | nc                         | rec    | intergenic |           |      |
| CFT073  | 4163853      | 4341919      | nc                         | rec    | intergenic |           |      |
| CFT073  | 4164317      | 4342383      | s                          | out    | i02_4173   | /         | CDS  |
| CFT073  | 4173011      | 4351077      | ns                         | out    | i02_4182   | uhpT      | CDS  |
| CFT073  | 4186694      | 4364760      | s                          | out    | i02_4195   | yidK      | CDS  |
| clone D | 4193039      | 4371105      | ns                         | out    | i02_4204   | yidS      | CDS  |
| CFT073  | 4199513      | 4377580      | ns                         | out    | i02_4210   | /         | CDS  |
| CFT073  | 4208516      | 4386584      | ns                         | out    | i02_4220   | rnpA      | CDS  |
| CFT073  | 4232942      | 4411010      | ns                         | rec    | i02_4244   | pstC      | CDS  |
| CFT073  | 4233021      | 4411089      | ns                         | rec    | i02_4244   | pstC      | CDS  |
| CFT073  | 4233031      | 4411099      | s                          | rec    | i02_4244   | pstC      | CDS  |
| CFT073  | 4233035      | 4411103      | ns                         | rec    | i02_4244   | pstC      | CDS  |
| CFT073  | 4247246      | 4425314      | s                          | out    | i02_4260   | gidA      | CDS  |
| clone D | 4265908      | 4443976      | nc                         | rec    | 16s rRNA   | rrs       | rRNA |
| CFT073  | 4266132      | 4444201      | nc                         | rec    | 16s rRNA   | rrs       | rRNA |
| CFT073  | 4266214      | 4444283      | nc                         | rec    | 16s rRNA   | rrs       | rRNA |
| CFT073  | 4266223      | 4444292      | nc                         | rec    | 16s rRNA   | rrs       | rRNA |
| CFT073  | 4266231      | 4444300      | nc                         | rec    | 16s rRNA   | rrs       | rRNA |
| CFT073  | 4266250      | 4444319      | nc                         | rec    | 16s rRNA   | rrs       | rRNA |
| CFT073  | 4266255      | 4444324      | nc                         | rec    | 16s rRNA   | rrs       | rRNA |
| CFT073  | 4266257      | 4444326      | nc                         | rec    | 16s rRNA   | rrs       | rRNA |
| CFT073  | 4266261      | 4444330      | nc                         | rec    | 16s rRNA   | rrs       | rRNA |
| CFT073  | 4266262      | 4444331      | nc                         | rec    | 16s rRNA   | rrs       | rRNA |
| CFT073  | 4266328      | 4444397      | nc                         | rec    | intergenic |           |      |
| CFT073  | 4266360      | 4444429      | nc                         | rec    | intergenic |           |      |
| CFT073  | 4266598      | 4444667      | nc                         | rec    | intergenic |           |      |
| CFT073  | 4266645      | 4444714      | nc                         | rec    | intergenic |           |      |
| CFT073  | 4266750      | 4444819      | nc                         | rec    | 23s rRNA   | rrl       | rRNA |
| CFT073  | 4266931      | 4445000      | nc                         | rec    | 23s rRNA   | rrl       | rRNA |
| CFT073  | 4266952      | 4445021      | nc                         | rec    | 23s rRNA   | rrl       | rRNA |
| clone D | 4266983      | 4445052      | nc                         | rec    | 23s rRNA   | rrl       | rRNA |
| CFT073  | 4267209      | 4445280      | nc                         | rec    | 23s rRNA   | rrl       | rRNA |
| CFT073  | 4267837      | 4445908      | nc                         | rec    | 23s rRNA   | rrl       | rRNA |
| CFT073  | 4267843      | 4445915      | nc                         | rec    | 23s rRNA   | rrl       | rRNA |
| CFT073  | 4267876      | 4445948      | nc                         | rec    | 23s rRNA   | rrl       | rRNA |
| CFT073  | 4267884      | 4445956      | nc                         | rec    | 23s rRNA   | rrl       | rRNA |
| CFT073  | 4267885      | 4445957      | nc                         | rec    | 23s rRNA   | rrl       | rRNA |
| CFT073  | 4267894      | 4445966      | nc                         | rec    | 23s rRNA   | rrl       | rRNA |
| CFT073  | 4267895      | 4445967      | nc                         | rec    | 23s rRNA   | rrl       | rRNA |
| CFT073  | 4268171      | 4446243      | nc                         | rec    | 23s rRNA   | rrl       | rRNA |
| CFT073  | 4268213      | 4446285      | nc                         | rec    | 23s rRNA   | rrl       | rRNA |
| CFT073  | 4269751      | 4447824      | nc                         | out    | intergenic |           |      |
| CFT073  | 4270509      | 4448582      | s                          | out    | i02_4276   | yifA      | CDS  |



| Lineage | Clone D site | CFT 073 site | mutation type <sup>a</sup> | recomb | Gene       | Gene name | Type |
|---------|--------------|--------------|----------------------------|--------|------------|-----------|------|
| clone D | 4289827      | 4467901      | ns                         | out    | i02_4296   | /         | CDS  |
| CFT073  | 4323599      | 4501680      | s                          | out    | i02_4327   | uvrD      | CDS  |
| CFT073  | 4383374      | 4561456      | nc                         | rec    | 16s rRNA   | rrs       | rRNA |
| clone D | 4383463      | 4561545      | nc                         | rec    | 16s rRNA   | rrs       | rRNA |
| CFT073  | 4384669      | 4562751      | nc                         | rec    | intergenic |           |      |
| clone D | 4384675      | 4562757      | nc                         | rec    | intergenic |           |      |
| CFT073  | 4385091      | 4563256      | nc                         | rec    | 23s rRNA   | rrl       | rRNA |
| CFT073  | 4385272      | 4563437      | nc                         | rec    | 23s rRNA   | rrl       | rRNA |
| CFT073  | 4386383      | 4564552      | nc                         | rec    | 23s rRNA   | rrl       | rRNA |
| CFT073  | 4386427      | 4564596      | nc                         | rec    | 23s rRNA   | rrl       | rRNA |
| CFT073  | 4386512      | 4564681      | nc                         | rec    | 23s rRNA   | rrl       | rRNA |
| CFT073  | 4386554      | 4564723      | nc                         | rec    | 23s rRNA   | rrl       | rRNA |
| CFT073  | 4386875      | 4565044      | nc                         | rec    | 23s rRNA   | rrl       | rRNA |
| clone D | 4386877      | 4565046      | nc                         | rec    | 23s rRNA   | rrl       | rRNA |
| CFT073  | 4386880      | 4565049      | nc                         | rec    | 23s rRNA   | rrl       | rRNA |
| clone D | 4412393      | 4590561      | s                          | out    | i02_4418   | yihV      | CDS  |
| CFT073  | 4414684      | 4592852      | s                          | out    | i02_4422   | /         | CDS  |
| CFT073  | 4436307      | 4614475      | ns                         | out    | i02_4446   | rhaA      | CDS  |
| clone D | 4436680      | 4614848      | s                          | out    | i02_4446   | rhaA      | CDS  |
| CFT073  | 4450344      | 4628512      | s                          | out    | i02_4462   | sbp       | CDS  |
| clone D | 4456745      | 4634913      | ns                         | out    | i02_4470   | glpX      | CDS  |
| clone D | 4466828      | 4644996      | s                          | out    | i02_4480   | priA      | CDS  |
| clone D | 4484996      | 4663164      | s                          | out    | i02_4493   | yijE      | CDS  |
| CFT073  | 4516087      | 4694255      | s                          | out    | i02_4518   | yijD      | CDS  |
| CFT073  | 4517164      | 4695332      | ns                         | out    | i02_4519   | trmA      | CDS  |
| CFT073  | 4519756      | 4697924      | s                          | out    | i02_4521   | murl      | CDS  |
| CFT073  | 4520807      | 4698975      | nc                         | rec    | intergenic |           |      |
| clone D | 4520842      | 4699009      | nc                         | rec    | intergenic |           |      |
| clone D | 4520877      | 4699045      | nc                         | rec    | intergenic |           |      |
| clone D | 4520878      | 4699047      | nc                         | rec    | intergenic |           |      |
| CFT073  | 4520883      | 4699052      | nc                         | rec    | intergenic |           |      |
| CFT073  | 4520973      | 4699142      | nc                         | rec    | 16s rRNA   | rrs       | rRNA |
| CFT073  | 4520982      | 4699151      | nc                         | rec    | 16s rRNA   | rrs       | rRNA |
| CFT073  | 4521157      | 4699326      | nc                         | rec    | 16s rRNA   | rrs       | rRNA |
| clone D | 4522043      | 4700212      | nc                         | rec    | 16s rRNA   | rrs       | rRNA |
| CFT073  | 4522236      | 4700409      | nc                         | rec    | 16s rRNA   | rrs       | rRNA |
| CFT073  | 4522289      | 4700467      | nc                         | rec    | 16s rRNA   | rrs       | rRNA |
| CFT073  | 4522456      | 4700634      | nc                         | rec    | intergenic |           |      |
| CFT073  | 4522859      | 4701031      | nc                         | rec    | intergenic |           |      |
| CFT073  | 4522964      | 4701136      | nc                         | rec    | 23s rRNA   | rrl       | rRNA |
| CFT073  | 4523145      | 4701317      | nc                         | rec    | 23s rRNA   | rrl       | rRNA |
| clone D | 4523197      | 4701369      | nc                         | rec    | 23s rRNA   | rrl       | rRNA |
| CFT073  | 4523237      | 4701409      | nc                         | rec    | 23s rRNA   | rrl       | rRNA |
| clone D | 4523238      | 4701410      | nc                         | rec    | 23s rRNA   | rrl       | rRNA |
| CFT073  | 4523423      | 4701596      | nc                         | rec    | 23s rRNA   | rrl       | rRNA |
| CFT073  | 4524051      | 4702224      | nc                         | rec    | 23s rRNA   | rrl       | rRNA |
| CFT073  | 4524057      | 4702231      | nc                         | rec    | 23s rRNA   | rrl       | rRNA |
| CFT073  | 4524090      | 4702264      | nc                         | rec    | 23s rRNA   | rrl       | rRNA |
| CFT073  | 4524098      | 4702272      | nc                         | rec    | 23s rRNA   | rrl       | rRNA |
| CFT073  | 4524099      | 4702273      | nc                         | rec    | 23s rRNA   | rrl       | rRNA |
| CFT073  | 4524108      | 4702282      | nc                         | rec    | 23s rRNA   | rrl       | rRNA |

| Lineage | Clone D site | CFT 073 site | mutation type <sup>a</sup> | recomb | Gene       | Gene name | Type |
|---------|--------------|--------------|----------------------------|--------|------------|-----------|------|
| CFT073  | 4524109      | 4702283      | nc                         | rec    | 23s rRNA   | rrl       | rRNA |
| CFT073  | 4524385      | 4702559      | nc                         | rec    | 23s rRNA   | rrl       | rRNA |
| CFT073  | 4524427      | 4702601      | nc                         | rec    | 23s rRNA   | rrl       | rRNA |
| clone D | 4524486      | 4702660      | nc                         | rec    | 23s rRNA   | rrl       | rRNA |
| clone D | 4524750      | 4702923      | nc                         | rec    | 23s rRNA   | rrl       | rRNA |
| clone D | 4525066      | 4703238      | nc                         | rec    | 23s rRNA   | rrl       | rRNA |
| clone D | 4526087      | 4704259      | nc                         | out    | intergenic |           |      |
| clone D | 4561232      | 4739404      | nc                         | rec    | 16s rRNA   | rrs       | rRNA |
| clone D | 4561235      | 4739407      | nc                         | rec    | 16s rRNA   | rrs       | rRNA |
| clone D | 4561246      | 4739418      | nc                         | rec    | 16s rRNA   | rrs       | rRNA |
| CFT073  | 4561786      | 4739958      | nc                         | rec    | 16s rRNA   | rrs       | rRNA |
| clone D | 4562418      | 4740590      | nc                         | rec    | 16s rRNA   | rrs       | rRNA |
| clone D | 4562781      | 4740953      | nc                         | rec    | intergenic |           |      |
| CFT073  | 4562983      | 4741156      | nc                         | rec    | intergenic |           |      |
| CFT073  | 4563030      | 4741203      | nc                         | rec    | intergenic |           |      |
| CFT073  | 4563135      | 4741308      | nc                         | rec    | 23s rRNA   | rrl       | rRNA |
| CFT073  | 4563392      | 4741565      | nc                         | rec    | 23s rRNA   | rrl       | rRNA |
| CFT073  | 4564222      | 4742395      | nc                         | rec    | 23s rRNA   | rrl       | rRNA |
| CFT073  | 4564228      | 4742402      | nc                         | rec    | 23s rRNA   | rrl       | rRNA |
| CFT073  | 4564261      | 4742435      | nc                         | rec    | 23s rRNA   | rrl       | rRNA |
| CFT073  | 4564269      | 4742443      | nc                         | rec    | 23s rRNA   | rrl       | rRNA |
| CFT073  | 4564270      | 4742444      | nc                         | rec    | 23s rRNA   | rrl       | rRNA |
| CFT073  | 4564279      | 4742453      | nc                         | rec    | 23s rRNA   | rrl       | rRNA |
| CFT073  | 4564280      | 4742454      | nc                         | rec    | 23s rRNA   | rrl       | rRNA |
| clone D | 4564657      | 4742831      | nc                         | rec    | 23s rRNA   | rrl       | rRNA |
| CFT073  | 4569851      | 4748027      | ns                         | out    | i02_4561   | aceB      | CDS  |
| CFT073  | 4585244      | 4763420      | s                          | out    | i02_4573   | /         | CDS  |
| clone D | 4590689      | 4768865      | ns                         | out    | i02_4579   | lysC      | CDS  |
| CFT073  | 4602361      | 4780537      | nc                         | out    | intergenic |           |      |
| CFT073  | 4622406      | 4800582      | s                          | out    | i02_4609   | /         | CDS  |
| CFT073  | 4626099      | 4804275      | s                          | out    | i02_4613   | alr       | CDS  |
| clone D | 4627342      | 4805518      | s                          | out    | i02_4614   | /         | CDS  |
| clone D | 4627905      | 4806081      | s                          | out    | i02_4615   | /         | CDS  |
| CFT073  | 4631749      | 4809925      | s                          | out    | i02_4617   | sucA      | CDS  |
| CFT073  | 4633577      | 4811753      | ns                         | out    | i02_4619   | /         | CDS  |
| clone D | 4655252      | 4833472      | s                          | out    | i02_4641   | /         | CDS  |
| CFT073  | 4658923      | 4837143      | ns                         | out    | i02_4645   | actP      | CDS  |
| clone D | 4667340      | 4845560      | s                          | out    | i02_4654   | nrfE      | CDS  |
| clone D | 4668303      | 4846523      | ns                         | out    | i02_4655   | nrfF      | CDS  |
| clone D | 4671386      | 4849606      | nc                         | out    | intergenic |           |      |
| clone D | 4681579      | 4859788      | s                          | out    | i02_4668   | yjcP      | CDS  |
| CFT073  | 4685538      | 4863747      | nc                         | out    | intergenic |           |      |
| CFT073  | 4685730      | 4863939      | s                          | out    | i02_4672   | yjcS      | CDS  |
| clone D | 4686261      | 4864470      | ns                         | out    | i02_4672   | yjcS      | CDS  |
| CFT073  | 4695657      | 4873866      | ns                         | rec    | i02_4681   | phnP      | CDS  |
| CFT073  | 4695924      | 4874133      | nc                         | rec    | intergenic |           |      |
| CFT073  | 4696327      | 4874536      | ns                         | rec    | i02_4682   | phnO      | CDS  |
| CFT073  | 4696345      | 4874554      | ns                         | rec    | i02_4682   | phnO      | CDS  |
| CFT073  | 4696372      | 4874581      | ns                         | rec    | i02_4683   | phnN      | CDS  |
| CFT073  | 4696409      | 4874618      | ns                         | rec    | i02_4683   | phnN      | CDS  |
| clone D | 4706808      | 4885017      | ns                         | out    | i02_4698   | phnA      | CDS  |

| Lineage | Clone D site | CFT 073 site | mutation type <sup>a</sup> | recomb | Gene       | Gene name | Type |
|---------|--------------|--------------|----------------------------|--------|------------|-----------|------|
| clone D | 4727547      | 4905756      | ns                         | out    | i02_4714   | /         | CDS  |
| CFT073  | 4739802      | 4918011      | ns                         | out    | i02_4727   | cadC      | CDS  |
| clone D | 4753727      | 4984072      | ns                         | out    | i02_4740   | yjeK      | CDS  |
| CFT073  | 4757619      | 4987964      | ns                         | out    | i02_4747   | frdD      | CDS  |
| CFT073  | 4758195      | 4988540      | s                          | out    | i02_4749   | frdB      | CDS  |
| CFT073  | 4759117      | 4989462      | s                          | out    | i02_4750   | frdA      | CDS  |
| CFT073  | 4764748      | 4995093      | ns                         | out    | i02_4753   | yjeP      | CDS  |
| CFT073  | 4767795      | 4998140      | ns                         | out    | i02_4755   | psd       | CDS  |
| clone D | 4790240      | 5020584      | s                          | out    | i02_4777   | yjfM      | CDS  |
| CFT073  | 4790974      | 5021317      | s                          | out    | i02_4778   | yjfC      | CDS  |
| CFT073  | 4823568      | 5053911      | s                          | out    | i02_4816   | cysQ      | CDS  |
| CFT073  | 4825471      | 5055814      | s                          | out    | i02_4819   | ytfL      | CDS  |
| CFT073  | 4831334      | 5061677      | ns                         | out    | i02_4822   | ytfN      | CDS  |
| CFT073  | 4864851      | 5095194      | nc                         | out    | intergenic |           |      |
| clone D | 4868624      | 5098967      | ns                         | out    | i02_4861   | /         | CDS  |
| CFT073  | 4883853      | 5114197      | ns                         | out    | i02_4873   | yjgB      | CDS  |
| CFT073  | 4939176      | 5131503      | ns                         | out    | i02_4905   | /         | CDS  |
| CFT073  | 4953849      | 5146176      | nc                         | out    | intergenic |           |      |
| CFT073  | 4963811      | 5156138      | ns                         | out    | i02_4931   | yjiJ      | CDS  |
| clone D | 4964151      | 5156478      | s                          | out    | i02_4931   | yjiJ      | CDS  |
| CFT073  | 4967637      | 5159964      | ns                         | out    | i02_4936   | yjiN      | CDS  |
| CFT073  | 5003843      | 5196172      | s                          | out    | i02_4966   | rsmC      | CDS  |
| CFT073  | 5013999      | 5206328      | s                          | out    | i02_4978   | deoC      | CDS  |
| CFT073  | 5015018      | 5207347      | s                          | out    | i02_4979   | deoA      | CDS  |
| CFT073  | 5019370      | 5212411      | ns                         | out    | i02_4982   | yjjJ      | CDS  |

<sup>a</sup>nc: in non-coding region; ns, non-synonymous; s, synonymous
