# Supplementary material for: Rates of Mutation and Host Transmission for an Escherichia coli Clone over 3 Years
Source: PubMed Central journal article supplement (PMC3203180; doi:10.1371/journal.pone.0026907), 2011-10-27
Supplement: pone.0026907.s009.pdf [file pone.0026907.s009.pdf]

**Table S8** Allocation of SNPs to lineages by virtual outgroup analysis. The *E. coli/Shigella* genomes used for the analysis are shown, with details of the base in outgroup genomes and genomes under analysis, and also the final allocation and a measure of support level for that allocation.

| Clone D base | Clone D site | CFT 073 base | CFT 073 site | mutation type <sup>a</sup> | Inferred ancestral base <sup>b</sup> | lineage inferred to mutate | Support level <sup>c</sup> | ED1a <sup>d</sup> | 536 | S88 | APEC O1 | UT189 | E2348/69 | ATCC8739 | K-12 | HS | SMS3-5 | IAI39 | E24377A | SE11 | 55989 | IAI1 | Sakai | UMN026 | B4 Sb227 | F5 8401 | SS Ss046 | D1 Sd197 | B18 BS512 | F2a 2457T | F2a 301 |   |   |
|--------------|--------------|--------------|--------------|----------------------------|--------------------------------------|----------------------------|----------------------------|-------------------|-----|-----|---------|-------|----------|----------|------|----|--------|-------|---------|------|-------|------|-------|--------|----------|---------|----------|----------|-----------|-----------|---------|---|---|
| c            | 7482         | t            | 8194         | s                          | t                                    | clone D                    | ++++                       | t                 | t   | t   | t       | t     | t        | t        | t    | t  | t      | t     | t       | t    | t     | t    | t     | t      | t        | t       | t        | t        | t         | t         | t       | t |   |
| c            | 37232        | t            | 37944        | s                          | c                                    | CFT073                     | ++                         | c                 | c   | c   | c       | c     | c        | c        | c    | c  | c      | c     | c       | c    | c     | c    | c     | c      | c        | c       | c        | c        | c         | c         | c       | c | c |
| g            | 68282        | t            | 69705        | ns                         | t                                    | clone D                    | ++++                       | t                 | t   | t   | t       | t     | t        | t        | t    | t  | t      | t     | t       | t    | t     | t    | t     | t      | t        | t       | t        | t        | t         | t         | t       | t | t |
| a            | 141616       | g            | 145065       | ns                         | g                                    | clone D                    | ++++                       | g                 | g   | g   | g       | g     | g        | g        | g    | g  | g      | g     | g       | g    | g     | g    | g     | g      | g        | g       | g        | g        | g         | g         | g       | g | g |
| c            | 142637       | t            | 146086       | s                          | c                                    | CFT073                     | ++++                       | c                 | c   | c   | c       | c     | c        | c        | c    | c  | c      | c     | c       | c    | c     | c    | c     | c      | c        | c       | c        | c        | c         | c         | c       | c | c |
| t            | 148054       | a            | 151497       | nc                         | t                                    | CFT073                     | ++                         | t                 | t   | t   | t       | t     | t        | t        | t    | t  | t      | t     | t       | t    | t     | t    | t     | t      | t        | t       | c        | c        | t         | t         | c       | c |   |
| g            | 165170       | a            | 168602       | s                          | a                                    | clone D                    | ++++                       | a                 | a   | a   | a       | a     | a        | a        | a    | a  | a      | a     | a       | a    | a     | a    | a     | a      | a        | a       | a        | a        | a         | a         | a       | a | a |
| t            | 166117       | c            | 169549       | ns                         | c                                    | clone D                    | ++++                       | c                 | c   | c   | c       | c     | c        | c        | c    | c  | c      | c     | c       | c    | c     | c    | c     | c      | c        | c       | c        | c        | c         | c         | c       | c | c |
| a            | 175531       | g            | 178963       | ns                         | g                                    | clone D                    | ++++                       | g                 | g   | g   | g       | g     | g        | g        | g    | g  | g      | g     | g       | g    | g     | g    | g     | g      | g        | g       | g        | g        | g         | g         | g       | g | g |
| a            | 220289       | t            | 224434       | ns                         | a                                    | CFT073                     | ++++                       | a                 | a   | a   | a       | a     | a        | a        | a    | a  | a      | a     | a       | a    | a     | a    | a     | a      | a        | a       | a        | a        | a         | a         | a       | a | a |
| c            | 224221       | a            | 228366       | ns                         | c                                    | CFT073                     | ++++                       | c                 | c   | c   | c       | c     | c        | c        | c    | c  | c      | c     | c       | c    | c     | c    | c     | c      | c        | c       | c        | c        | c         | c         | c       | c | c |
| t            | 229285       | c            | 233427       | ns                         | c                                    | clone D                    | ++++                       | c                 | c   | c   | c       | c     | c        | c        | c    | c  | c      | c     | c       | c    | c     | c    | c     | c      | c        | c       | c        | c        | c         | c         | c       | c | c |
| t            | 230078       | c            | 234220       | nc                         | c                                    | clone D                    | ++++                       | c                 | c   | c   | c       | c     | c        | c        | c    | c  | c      | c     | c       | c    | c     | c    | c     | c      | c        | c       | c        | c        | c         | c         | c       | c | c |
| a            | 230842       | g            | 234984       | ns                         | a                                    | CFT073                     | ++++                       | a                 | a   | a   | a       | a     | a        | a        | a    | a  | a      | a     | a       | a    | a     | a    | a     | a      | a        | a       | a        | a        | a         | a         | a       | a | a |
| a            | 230892       | g            | 235034       | s                          | g                                    | clone D                    | ++++                       | g                 | g   | g   | g       | g     | g        | g        | g    | g  | g      | g     | g       | g    | g     | g    | g     | g      | g        | g       | g        | g        | g         | g         | g       | g | g |
| t            | 231008       | c            | 235150       | nc                         | c                                    | clone D                    | ++++                       | c                 | c   | c   | c       | c     | c        | c        | c    | c  | c      | c     | c       | c    | c     | c    | c     | c      | c        | c       | c        | c        | c         | c         | c       | c | c |
| c            | 231133       | a            | 235275       | nc                         | c                                    | CFT073                     | ++                         | c                 | a   | c   | a       | c     | c        | c        | c    | c  | c      | t     | c       | c    | c     | c    | c     | c      | a        | t       | t        | c        | t         | t         | c       | t | c |
| t            | 231226       | c            | 235368       | nc                         | c                                    | clone D                    | ++++                       | c                 | c   | c   | c       | c     | c        | c        | c    | c  | t      | c     | c       | c    | c     | c    | c     | c      | t        | c       | c        | c        | t         | c         | c       | t | c |
| g            | 232045       | a            | 236187       | nc                         | g                                    | CFT073                     | ++++                       | g                 | g   | g   | a       | g     | g        | g        | a    | g  | g      | a     | g       | g    | g     | g    | a     | g      | g        | g       | a        | a        | g         | g         | g       | g |   |
| g            | 232049       | c            | 236191       | nc                         | g                                    | CFT073                     | ++++                       | g                 | g   | g   | c       | g     | g        | g        | c    | g  | g      | c     | g       | g    | g     | g    | c     | g      | g        | g       | c        | c        | g         | g         | g       | g |   |
| t            | 232053       | c            | 236195       | nc                         | t                                    | CFT073                     | ++++                       | t                 | t   | t   | c       | t     | t        | t        | c    | t  | t      | c     | t       | t    | t     | t    | c     | t      | t        | t       | t        | c        | g         | t         | t       | t | t |
| a            | 232065       | t            | 236206       | nc                         | a                                    | CFT073                     | ++++                       | a                 | a   | a   | t       | a     | a        | a        | t    | a  | a      | t     | a       | a    | a     | a    | t     | a      | a        | a       | t        | a        | a         | a         | a       | a | a |
| c            | 232081       | t            | 236223       | nc                         | c                                    | CFT073                     | ++++                       | c                 | c   | c   | t       | c     | c        | c        | t    | c  | c      | t     | c       | c    | c     | c    | t     | c      | c        | c       | c        | t        | t         | c         | c       | c | c |

| Clone D base | Clone D site | CFT 073 base | CFT 073 site | mutation type <sup>a</sup> | Inferred ancestral base <sup>b</sup> | lineage inferred to mutate | Support level <sup>c</sup> | ED1a <sup>d</sup> | 536 | S88 | APEC O1 | UT189 | E2348/69 | ATCC8739 | K-12 | HS | SMS3-5 | IAI39 | E24377A | SE11 | 55989 | IAI1 | Sakai | UMN026 | B4 Sb227 | F5 8401 | SS Ss046 | D1 Sd197 | B18 BS512 | F2a 2457T | F2a 301 |   |  |
|--------------|--------------|--------------|--------------|----------------------------|--------------------------------------|----------------------------|----------------------------|-------------------|-----|-----|---------|-------|----------|----------|------|----|--------|-------|---------|------|-------|------|-------|--------|----------|---------|----------|----------|-----------|-----------|---------|---|--|
| a            | 232521       | g            | 236911       | nc                         | g                                    | clone D                    | ++++                       | g                 | g   | g   | g       | g     | g        | g        | g    | g  | g      | g     | g       | g    | g     | g    | g     | g      | g        | g       | g        | g        | g         | g         | g       | g |  |
| a            | 232747       | g            | 236988       | nc                         | a                                    | CFT073                     | ++++                       | a                 | a   | a   | g       | a     | a        | a        | g    | a  | a      | a     | a       | a    | a     | a    | a     | a      | a        | a       | a        | a        | a         | a         | a       | a |  |
| c            | 232846       | t            | 237087       | nc                         | t                                    | clone D                    | ++++                       | t                 | c   | t   | t       | t     | c        | c        | t    | c  | t      | t     | c       | c    | c     | c    | c     | c      | c        | c       | c        | t        | t         | c         | c       | c |  |
| g            | 232849       | a            | 237090       | nc                         | a                                    | clone D                    | ++++                       | a                 | a   | a   | a       | a     | g        | a        | a    | a  | a      | a     | a       | a    | g     | a    | a     | a      | a        | a       | a        | a        | a         | a         | a       | a |  |
| a            | 232891       | g            | 237132       | nc                         | a                                    | CFT073                     | ++                         | a                 | a   | t   | g       | t     | g        | a        | g    | t  | t      | t     | a       | a    | a     | a    | a     | a      | a        | a       | a        | a        | t         | a         | a       | a |  |
| g            | 233001       | a            | 237242       | nc                         | g                                    | CFT073                     | ++++                       | g                 | a   | g   | a       | g     | g        | a        | a    | a  | a      | a     | a       | a    | a     | a    | a     | a      | a        | a       | a        | a        | a         | a         | a       | a |  |
| t            | 233234       | c            | 237475       | nc                         | c                                    | clone D                    | ++++                       | c                 | c   | c   | c       | c     | c        | c        | c    | c  | c      | t     | c       | t    | c     | t    | c     | c      | t        | t       | c        | c        | t         | t         | t       | t |  |
| a            | 233274       | g            | 237515       | nc                         | a                                    | CFT073                     | ++++                       | a                 | g   | a   | g       | a     | a        | g        | g    | g  | a      | a     | g       | g    | g     | a    | a     | g      | a        | a       | a        | a        | a         | a         | a       | a |  |
| t            | 233275       | c            | 237516       | nc                         | c                                    | clone D                    | ++                         | c                 | c   | t   | c       | t     | t        | c        | c    | c  | c      | c     | c       | c    | c     | c    | t     | c      | c        | t       | c        | t        | t         | t         | c       | c |  |
| c            | 233459       | a            | 237700       | nc                         | c                                    | CFT073                     | ++++                       | c                 | c   | c   | a       | c     | c        | c        | a    | a  | c      | c     | a       | a    | a     | a    | c     | c      | a        | a       | a        | c        | a         | a         | a       | a |  |
| t            | 233763       | c            | 238005       | nc                         | t                                    | CFT073                     | ++++                       | t                 | t   | t   | c       | t     | t        | t        | c    | t  | t      | t     | t       | t    | t     | t    | t     | c      | t        | t       | t        | c        | t         | t         | t       | t |  |
| a            | 234088       | g            | 238330       | nc                         | a                                    | CFT073                     | ++++                       | a                 | a   | a   | g       | a     | a        | g        | g    | a  | a      | a     | g       | a    | a     | g    | a     | g      | g        | g       | g        | g        | a         | a         | g       | g |  |
| t            | 234094       | c            | 238337       | nc                         | t                                    | CFT073                     | ++++                       | t                 | t   | t   | c       | t     | t        | c        | c    | t  | t      | t     | c       | t    | t     | c    | t     | c      | c        | c       | c        | t        | t         | c         | c       | c |  |
| g            | 234135       | t            | 238378       | nc                         | g                                    | CFT073                     | ++++                       | g                 | g   | g   | t       | g     | g        | t        | t    | t  | t      | t     | t       | t    | t     | t    | t     | t      | t        | t       | t        | t        | t         | t         | t       | t |  |
| c            | 234136       | a            | 238379       | nc                         | c                                    | CFT073                     | ++                         | c                 | c   | c   | a       | c     | c        | g        | a    | g  | g      | a     | g       | a    | a     | g    | a     | a      | g        | g       | g        | a        | a         | g         | g       | g |  |
| g            | 234145       | t            | 238388       | nc                         | g                                    | CFT073                     | ++                         | g                 | g   | g   | t       | g     | g        | c        | t    | c  | c      | t     | c       | t    | t     | c    | t     | t      | t        | t       | c        | t        | t         | t         | t       | t |  |
| t            | 234146       | a            | 238389       | nc                         | t                                    | CFT073                     | ++++                       | t                 | t   | t   | a       | t     | t        | a        | a    | a  | a      | a     | a       | a    | a     | a    | a     | a      | a        | a       | a        | a        | a         | a         | a       | a |  |
| c            | 234422       | t            | 238665       | nc                         | c                                    | CFT073                     | ++++                       | c                 | c   | c   | t       | c     | c        | t        | t    | t  | t      | t     | t       | t    | t     | t    | t     | t      | c        | t       | t        | t        | c         | t         | t       | t |  |
| g            | 234464       | a            | 238707       | nc                         | g                                    | CFT073                     | ++++                       | g                 | g   | g   | a       | g     | g        | a        | a    | a  | a      | a     | a       | a    | a     | a    | a     | a      | a        | a       | a        | a        | a         | a         | a       | a |  |
| a            | 234523       | c            | 238766       | nc                         | c                                    | clone D                    | ++++                       | c                 | c   | c   | c       | c     | c        | c        | c    | c  | c      | c     | c       | c    | c     | c    | c     | c      | c        | c       | c        | c        | c         | c         | c       | c |  |
| t            | 234787       | c            | 239029       | nc                         | c                                    | clone D                    | ++                         | c                 | g   | g   | c       | g     | g        | g        | c    | c  | g      | g     | c       | c    | c     | c    | c     | g      | c        | c       | c        | c        | c         | c         | c       | c |  |
| g            | 235123       | a            | 239364       | nc                         | g                                    | CFT073                     | ++                         | g                 | g   | g   | a       | g     | g        | a        | a    | a  | g      | g     | a       | a    | a     | a    | g     | a      | a        | a       | a        | a        | a         | a         | a       | a |  |
| a            | 235720       | g            | 239961       | nc                         | a                                    | CFT073                     | +                          | t                 | t   | t   | t       | t     | g        | a        | a    | a  | a      | a     | a       | a    | a     | a    | g     | a      | a        | g       | g        | a        | a         | g         | g       |   |  |
| t            | 235919       | c            | 240160       | nc                         | c                                    | clone D                    | ++++                       | c                 | c   | c   | c       | c     | c        | c        | c    | c  | c      | c     | c       | c    | c     | c    | c     | c      | c        | c       | c        | c        | c         | c         | c       | c |  |
| g            | 241720       | t            | 245961       | ns                         | g                                    | CFT073                     | ++++                       | g                 | g   | t   | t       | t     | g        | g        | g    | g  | g      | g     | g       | t    | g     | g    | g     | g      | g        | g       | g        | g        | g         | g         | g       | g |  |
| g            | 262792       | a            | 258602       | ns                         | g                                    | CFT073                     | ++                         | g                 | a   | g   |         | a     | a        |          |      |    | g      |       | g       |      |       |      | a     | g      |          |         |          |          |           |           |         |   |  |
| t            | 262803       | c            | 258613       | ns                         | c                                    | clone D                    | ++                         | c                 | c   |     |         | c     | c        |          |      |    | c      |       | t       |      |       |      | c     | c      |          |         |          |          | c         |           |         |   |  |
| c            | 262805       | t            | 258615       | ns                         | c                                    | CFT073                     | ++                         | c                 | c   |     |         | t     | c        |          |      |    | c      |       | c       |      |       |      | c     | c      |          |         |          |          | c         |           |         |   |  |











| Clone D base | Clone D site | CFT 073 base | CFT 073 site | mutation type <sup>a</sup> | Inferred ancestral base <sup>b</sup> | lineage inferred to mutate | Support level <sup>c</sup> | ED1a <sup>d</sup> | 536 | S88 | APEC O1 | UT189 | E2348/69 | ATCC8739 | K-12 | HS | SMS3-5 | IAI39 | E24377A | SE11 | 55989 | IAI1 | Sakai | UMN026 | B4 Sb227 | F5 8401 | SS Ss046 | D1 Sd197 | B18 BS512 | F2a 2457T | F2a 301 |   |   |
|--------------|--------------|--------------|--------------|----------------------------|--------------------------------------|----------------------------|----------------------------|-------------------|-----|-----|---------|-------|----------|----------|------|----|--------|-------|---------|------|-------|------|-------|--------|----------|---------|----------|----------|-----------|-----------|---------|---|---|
| t            | 1048389      | g            | 1081758      | ns                         | t                                    | CFT073                     | ++++                       | t                 | t   | t   | t       | t     | t        | t        | t    | t  | t      | t     | t       | t    | t     | t    | t     | t      | t        | t       | t        | t        | t         | t         | t       | t |   |
| g            | 1051361      | t            | 1084730      | ns                         | g                                    | CFT073                     | ++++                       | g                 | g   | g   | g       | g     | g        | g        | g    | g  | g      | t     | g       | g    | g     | g    | g     | g      | g        | g       | g        | g        | g         | g         | g       | g |   |
| t            | 1063558      | c            | 1096927      | ns                         | t                                    | CFT073                     | ++++                       | t                 | t   | t   | t       | t     | t        | t        | t    | t  | t      | t     | t       | t    | t     | t    | t     | t      | t        | t       | t        | t        | t         | t         | t       | t |   |
| t            | 1065603      | a            | 1098972      | nc                         | a                                    | clone D                    | ++                         | a                 | a   | a   | a       | a     | a        | a        | a    | a  | a      | a     | a       | a    | a     | a    | a     | a      |          | a       | a        | a        |           | a         | a       |   |   |
| g            | 1071559      | a            | 1104928      | s                          | a                                    | clone D                    | ++                         | a                 | a   | a   | a       | a     | a        | a        | a    | a  | a      | a     | a       | a    | a     | a    | a     | a      |          | a       | a        | a        |           | a         | a       |   |   |
| c            | 1073352      | a            | 1106721      | s                          | c                                    | CFT073                     | ++                         | c                 | c   | c   | c       | c     | c        | c        | c    | c  | c      | c     | c       | c    | c     | c    | c     | c      |          | c       | c        | c        |           | c         | c       |   |   |
| a            | 1074028      | g            | 1107397      | ns                         | g                                    | clone D                    | ++++                       | g                 | g   | g   | g       | g     | g        | g        | g    | g  | g      | g     | g       | g    | g     | g    | g     | g      | g        | g       | g        | g        | g         | g         | g       | g |   |
| g            | 1125611      | c            | 1158981      | nc                         | ?                                    | ?                          | +/-                        |                   |     |     |         |       |          |          |      |    |        |       |         |      |       |      |       |        |          |         |          |          |           |           |         |   |   |
| g            | 1129793      | t            | 1163163      | nc                         | g                                    | CFT073                     | +                          |                   | g   |     |         | g     |          |          |      |    |        |       |         |      |       |      |       |        |          |         |          |          |           |           |         |   |   |
| a            | 1131681      | g            | 1165052      | nc                         | ?                                    | ?                          | +/-                        |                   |     |     |         |       |          |          |      |    |        |       |         |      |       |      |       |        |          |         |          |          |           |           |         |   |   |
| a            | 1132196      | g            | 1165567      | s                          | ?                                    | ?                          | +/-                        |                   |     |     |         |       |          |          |      |    |        |       |         |      |       |      |       |        |          |         |          |          |           |           |         |   |   |
| g            | 1145111      | a            | 1178484      | s                          | ?                                    | ?                          | +/-                        |                   |     |     |         |       |          |          |      |    |        |       |         |      |       |      |       |        |          |         |          |          |           |           |         |   |   |
| g            | 1153965      | a            | 1187338      | nc                         | a                                    | clone D                    | +                          |                   | a   |     |         | a     |          |          |      |    |        |       |         |      |       |      |       |        |          |         |          |          |           |           |         |   |   |
| a            | 1172295      | t            | 1205668      | s                          | a                                    | CFT073                     | +                          |                   | a   |     |         | a     |          |          |      |    |        |       |         |      |       |      |       |        |          |         |          |          | a         |           |         |   |   |
| t            | 1194598      | g            | 1229284      | s                          | t                                    | CFT073                     | ++                         | t                 |     |     |         |       |          |          | t    |    |        |       |         |      | t     |      |       | t      |          |         |          |          |           |           | t       | t |   |
| g            | 1195856      | a            | 1230542      | ns                         | g                                    | CFT073                     | ++                         | g                 |     |     |         |       |          |          |      |    |        |       |         |      | g     |      |       | g      |          |         |          |          |           |           | g       | g |   |
| c            | 1200857      | t            | 1237959      | nc                         | c                                    | CFT073                     | ++                         | c                 | c   | c   | c       | c     | c        |          | c    |    | c      | c     | c       |      | c     |      | c     | c      |          |         |          | c        | c         | c         | c       | c |   |
| t            | 1203224      | c            | 1241037      | nc                         | t                                    | CFT073                     | +                          |                   |     |     |         | t     | t        |          |      |    | t      |       |         |      |       |      | t     |        |          |         |          |          | t         |           |         |   |   |
| t            | 1210308      | a            | 1248122      | ns                         | t                                    | CFT073                     | ++                         | t                 | t   | t   | t       | t     | t        | t        | t    | t  | t      | t     | t       | t    | t     | t    | t     | t      | t        | t       | t        | t        | t         | t         | t       | t |   |
| a            | 1212641      | g            | 1250455      | ns                         | g                                    | clone D                    | ++++                       | g                 | g   | g   | g       | g     | g        | g        | g    | g  | g      | g     | g       | g    | g     | g    | g     | g      | g        | g       | g        | g        | g         | g         | g       | g | g |
| g            | 1235940      | c            | 1273757      | ns                         | c                                    | clone D                    | ++++                       | c                 | c   | c   | c       | c     | c        | c        | c    | c  | c      | c     | c       | c    | c     | c    | c     | c      | c        | c       | c        | c        | c         | c         | c       | c | c |
| c            | 1236058      | a            | 1273875      | s                          | c                                    | CFT073                     | ++++                       | c                 | c   | c   | c       | c     | c        | c        | c    | c  | c      | c     | c       | c    | c     | c    | c     | c      | c        | c       | c        | c        | c         | c         | c       | c | c |
| a            | 1249884      | g            | 1287701      | ns                         | g                                    | clone D                    | ++++                       | g                 | g   | g   | g       | g     | g        | g        | g    | g  | g      | g     | g       | g    | g     | g    | g     | g      | g        | g       | g        | g        | g         | g         | g       | g | g |
| t            | 1294835      | a            | 1333367      | ns                         | t                                    | CFT073                     | ++                         | t                 |     | t   | t       | t     | t        | t        | t    |    | t      |       |         | t    | t     | t    | t     |        |          |         |          |          |           |           | t       |   |   |
| a            | 1308118      | c            | 1347361      | nc                         | c                                    | clone D                    | +                          |                   |     |     |         |       | c        |          |      |    |        |       |         | c    |       |      | c     |        |          |         |          |          |           |           |         |   |   |
| c            | 1311991      | t            | 1351234      | s                          | c                                    | CFT073                     | ++                         | c                 |     | t   | t       | t     | t        |          |      |    |        | t     |         | t    | t     |      | t     | c      |          | g       |          |          | t         | g         | g       |   |   |
| t            | 1320170      | c            | 1359413      | s                          | c                                    | clone D                    | ++                         | c                 | c   | c   | c       | c     | c        | c        |      |    |        |       | c       |      | c     | c    | c     | c      |          |         | c        |          | c         |           |         |   |   |
| t            | 1322018      | c            | 1361261      | s                          | g                                    | clone D                    | ++                         | g                 | c   | c   | c       | c     | c        | c        |      |    |        |       | c       |      | c     | t    | c     | c      | c        |         | c        |          | t         |           |         |   |   |



| Clone D base | Clone D site | CFT 073 base | CFT 073 site | mutation type <sup>a</sup> | Inferred ancestral base <sup>b</sup> | lineage inferred to mutate | Support level <sup>c</sup> | ED1a <sup>d</sup> | 536 | S88 | APEC O1 | UT189 | E2348/69 | ATCC8739 | K-12 | HS | SMS3-5 | IAI39 | E24377A | SE11 | 55989 | IAI1 | Sakai | UMN026 | B4 Sb227 | F5 8401 | SS Ss046 | D1 Sd197 | B18 BS512 | F2a 2457T | F2a 301 |
|--------------|--------------|--------------|--------------|----------------------------|--------------------------------------|----------------------------|----------------------------|-------------------|-----|-----|---------|-------|----------|----------|------|----|--------|-------|---------|------|-------|------|-------|--------|----------|---------|----------|----------|-----------|-----------|---------|
| g            | 1322019      | a            | 1361262      | ns                         | g                                    | CFT073                     | ++                         | g                 | a   | a   | a       | a     | a        | a        |      |    |        |       | a       | a    | g     | a    | a     | a      |          |         | a        |          | g         |           |         |
| t            | 1322021      | c            | 1361264      | ns                         | a                                    | clone D                    | ++                         | a                 | c   | c   | c       | c     | c        | c        |      |    |        |       | c       | c    | t     | c    | c     | c      |          |         | c        |          | t         |           |         |
| t            | 1322033      | c            | 1361276      | s                          | g                                    | clone D                    | ++                         | g                 | c   | c   | c       | c     | c        | c        |      |    |        |       | c       | c    | t     | c    | c     | c      |          |         | c        |          | c         |           |         |
| c            | 1322046      | a            | 1361289      | ns                         | a                                    | clone D                    | ++                         | a                 | a   | a   | a       | a     | a        | a        |      |    |        |       | a       | a    | c     | a    | a     | a      |          |         | a        |          | c         |           |         |
| g            | 1322054      | a            | 1361297      | s                          | a                                    | clone D                    | ++                         | a                 | a   | a   | a       | a     | a        | a        |      |    |        |       | a       | a    | g     | a    | a     | a      |          |         | a        |          | g         |           |         |
| t            | 1322058      | c            | 1361301      | ns                         | c                                    | clone D                    | ++                         | c                 | c   | c   | c       | c     | c        | c        |      |    |        |       | c       | c    | t     | c    | c     | c      |          |         | c        |          | t         |           |         |
| t            | 1322060      | g            | 1361303      | ns                         | g                                    | clone D                    | ++                         | g                 | g   | g   | g       | g     | g        | g        |      |    |        |       | g       | g    | t     | g    | g     | g      |          |         | g        |          | t         |           |         |
| g            | 1322063      | t            | 1361306      | s                          | t                                    | clone D                    | ++                         | t                 | t   | t   | t       | t     | t        | t        |      |    |        |       | t       | t    | g     | t    | t     | g      |          |         | t        |          | g         |           |         |
| g            | 1322072      | a            | 1361315      | s                          | c                                    | clone D                    | ++                         | c                 | a   | a   | a       | a     | a        | a        |      |    |        |       | a       | a    | g     | a    | a     | a      |          |         | a        |          | g         |           |         |
| a            | 1322084      | t            | 1361327      | s                          | t                                    | clone D                    | ++                         | t                 | t   | t   | t       | t     | t        | t        |      |    |        |       | t       | t    | a     | t    | t     | t      |          |         | t        |          | t         |           |         |
| c            | 1323330      | t            | 1362573      | s                          | c                                    | CFT073                     | +                          | g                 | c   | c   | c       | c     | c        | c        |      |    |        |       | c       | t    | c     | t    | c     | a      | c        | t       | c        | c        | t         | c         | c       |
| a            | 1332492      | c            | 1371735      | nc                         | c                                    | clone D                    | ++                         | c                 | c   | a   | a       | a     | c        |          | a    |    |        |       | a       | a    |       |      |       | a      |          |         | a        |          | a         |           |         |
| a            | 1332511      | g            | 1371754      | nc                         | g                                    | clone D                    | ++                         | g                 | g   | a   | a       | a     | g        |          | a    |    |        |       | a       | a    | a     |      |       | a      |          |         | a        |          | a         |           |         |
| c            | 1332512      | t            | 1371755      | nc                         | t                                    | clone D                    | ++                         | t                 | t   | c   | c       | c     | t        |          | c    |    |        |       | c       | c    |       | c    |       | c      |          |         | c        |          | c         |           |         |
| g            | 1332525      | a            | 1371768      | nc                         | a                                    | clone D                    | ++                         | a                 | a   | g   | g       | g     | a        |          | g    |    |        |       | g       | g    |       | g    |       | g      |          |         | g        |          | g         |           |         |
| t            | 1332558      | g            | 1371801      | nc                         | g                                    | clone D                    | ++                         | g                 | g   | t   | t       | t     | g        |          | t    |    |        |       | t       | t    | t     | t    |       | g      | t        | t       | t        | t        | t         | t         | t       |
| a            | 1332560      | g            | 1371803      | nc                         | g                                    | clone D                    | ++                         | g                 | g   | a   | a       | a     | g        |          | a    |    |        |       | a       | a    | a     | a    |       | a      | a        | a       | a        | a        | a         | a         | a       |
| a            | 1332561      | c            | 1371804      | nc                         | c                                    | clone D                    | ++                         | c                 | c   | a   | a       | a     | c        |          | a    |    |        |       | a       | a    | t     | a    |       | t      | a        | a       | a        | a        | a         | a         | a       |
| t            | 1332579      | c            | 1371822      | nc                         | c                                    | clone D                    | ++                         | c                 | c   | t   | t       | t     | c        |          | t    |    |        |       | t       | t    | t     | t    |       | t      | t        | t       | t        | t        | t         | t         | t       |
| g            | 1332627      | t            | 1371870      | ns                         | t                                    | clone D                    | ++                         | t                 | t   | g   | g       | g     | t        |          | g    |    |        |       | g       | g    | g     | g    |       | g      | g        | g       | g        | g        | g         | g         | g       |
| g            | 1343579      | t            | 1394274      | s                          | g                                    | CFT073                     | ++++                       | g                 | g   | g   | g       | g     | g        | g        | g    | g  | g      | g     | g       | g    | g     | g    | g     | g      | g        | g       | g        | g        | g         | g         | g       |
| c            | 1343615      | a            | 1394310      | ns                         | c                                    | CFT073                     | ++++                       | c                 | c   | c   | c       | c     | c        | c        | c    | c  | c      | c     | c       | c    | c     | c    | c     | c      | c        | c       | c        | c        | c         | c         | c       |
| t            | 1358433      | c            | 1412847      | s                          | t                                    | CFT073                     | +                          |                   |     | t   | t       | t     | t        |          |      |    |        |       |         |      |       |      | t     |        |          |         |          |          |           |           |         |
| a            | 1358517      | t            | 1412935      | ns                         | a                                    | CFT073                     | +                          |                   |     | a   | a       | a     | a        |          |      |    |        |       |         |      |       |      | a     |        |          |         |          |          |           |           |         |
| g            | 1363135      | a            | 1418868      | ns                         | a                                    | clone D                    | ++                         |                   | a   | a   | a       | a     |          |          | a    |    |        |       |         | a    | a     | a    | a     | a      |          |         | a        |          |           |           |         |
| t            | 1364569      | c            | 1420302      | ns                         | c                                    | clone D                    | ++                         |                   | c   | c   | c       | c     |          |          | g    |    |        |       |         | c    | g     | c    | g     |        | c        |         | c        | c        |           | c         | c       |
| a            | 1365402      | g            | 1421135      | ns                         | g                                    | clone D                    | ++                         |                   | g   | g   | g       | g     |          |          | g    |    |        |       |         | g    | g     | g    | g     |        | g        |         | a        | g        |           | a         | a       |
| t            | 1365404      | g            | 1421137      | ns                         | g                                    | clone D                    | ++                         |                   | g   | g   | g       | g     |          |          | g    |    |        |       |         | g    | g     | g    | g     |        | g        |         | t        | g        |           | t         | t       |









| Clone D base | Clone D site | CFT 073 base | CFT 073 site | mutation type <sup>a</sup> | Inferred ancestral base <sup>b</sup> | lineage inferred to mutate | Support level <sup>c</sup> | ED1a <sup>d</sup> | 536 | S88 | APEC O1 | UT189 | E2348/69 | ATCC8739 | K-12 | HS | SMS3-5 | IAI39 | E24377A | SE11 | 55989 | IAI1 | Sakai | UMN026 | B4 Sb227 | F5 8401 | SS Ss046 | D1 Sd197 | B18 BS512 | F2a 2457T | F2a 301 |   |   |   |  |
|--------------|--------------|--------------|--------------|----------------------------|--------------------------------------|----------------------------|----------------------------|-------------------|-----|-----|---------|-------|----------|----------|------|----|--------|-------|---------|------|-------|------|-------|--------|----------|---------|----------|----------|-----------|-----------|---------|---|---|---|--|
| c            | 2296690      | a            | 2358130      | nc                         | c                                    | CFT073                     | +                          | a                 | c   | c   | a       |       |          |          |      |    | c      | c     |         |      | c     |      |       |        |          |         |          |          |           |           |         |   |   |   |  |
| t            | 2296802      | c            | 2358242      | nc                         | c                                    | clone D                    | +                          | c                 | c   | c   | c       |       |          |          |      |    | t      | t     |         |      | c     |      |       |        |          |         |          |          |           |           |         |   |   |   |  |
| g            | 2296803      | a            | 2358243      | nc                         | a                                    | clone D                    | +                          | a                 | a   | a   | a       |       |          |          |      |    | a      | g     |         |      | a     |      |       |        |          |         |          |          |           |           |         |   |   |   |  |
| t            | 2296816      | c            | 2358256      | nc                         | c                                    | clone D                    | +                          | c                 | c   | c   | c       |       |          |          |      |    | c      | t     |         |      | c     |      |       |        |          |         |          |          |           |           |         |   |   |   |  |
| c            | 2296817      | a            | 2358257      | nc                         | a                                    | clone D                    | +                          | a                 | a   | a   | a       |       |          |          |      |    | a      | c     |         |      | a     |      |       |        |          |         |          |          |           |           |         |   |   |   |  |
| t            | 2296820      | c            | 2358260      | nc                         | c                                    | clone D                    | +                          | c                 | c   | c   | c       |       |          |          |      |    | c      | t     |         |      | c     |      |       |        |          |         |          |          |           |           |         |   |   |   |  |
| c            | 2296825      | t            | 2358265      | nc                         | t                                    | clone D                    | +                          | t                 | t   | t   | t       |       |          |          |      |    | t      | c     |         |      | t     |      |       |        |          |         |          |          |           |           |         |   |   |   |  |
| c            | 2296826      | t            | 2358266      | nc                         | t                                    | clone D                    | +                          | t                 | t   | t   | t       |       |          |          |      |    | t      | c     |         |      | t     |      |       |        |          |         |          |          |           |           |         |   |   |   |  |
| a            | 2296835      | c            | 2358275      | nc                         | c                                    | clone D                    | +                          | c                 | c   | c   | c       |       |          |          |      |    | c      | a     |         |      | c     |      |       |        |          |         |          |          |           |           |         |   |   |   |  |
| t            | 2296838      | c            | 2358278      | nc                         | c                                    | clone D                    | +                          | c                 | c   | c   | c       |       |          |          |      |    | c      | t     |         |      | c     |      |       |        |          |         |          |          |           |           |         |   |   |   |  |
| a            | 2296845      | t            | 2358285      | nc                         | t                                    | clone D                    | +                          | t                 | t   | t   | t       |       |          |          |      |    | t      | a     |         |      | t     |      |       |        |          |         |          |          |           |           |         |   |   |   |  |
| c            | 2296990      | t            | 2358430      | nc                         | t                                    | clone D                    | +                          | t                 | t   | t   | c       |       |          |          |      |    | t      | c     |         |      | t     |      |       |        |          |         |          |          |           |           |         |   |   |   |  |
| t            | 2296992      | c            | 2358432      | nc                         | t                                    | CFT073                     | +                          | c                 | t   | t   | t       |       |          |          |      |    | t      | t     |         |      | t     |      |       |        |          |         |          |          |           |           |         |   |   |   |  |
| c            | 2296994      | t            | 2358434      | nc                         | t                                    | clone D                    | +                          | t                 | t   | t   | c       |       |          |          |      |    | t      | c     |         |      | t     |      |       |        |          |         |          |          |           |           |         |   |   |   |  |
| g            | 2298518      | a            | 2359959      | s                          | g                                    | CFT073                     | +                          | g                 | g   | g   | g       | g     |          |          |      |    | g      | g     |         |      | g     |      |       | g      |          |         |          |          |           |           |         |   |   |   |  |
| g            | 2299407      | a            | 2360848      | ns                         | g                                    | CFT073                     | +                          | a                 | g   | g   | a       | g     |          |          |      |    | g      | g     |         |      | g     |      |       | g      |          |         |          |          |           |           |         |   |   |   |  |
| a            | 2299410      | c            | 2360851      | s                          | c                                    | clone D                    | +                          | c                 | c   | c   | c       | c     |          |          |      |    | c      | c     |         |      | c     |      |       | c      |          |         |          |          |           |           |         |   |   |   |  |
| c            | 2299700      | g            | 2361141      | ns                         | c                                    | CFT073                     | +                          | g                 | c   | c   | g       | c     |          |          |      |    | c      | c     |         |      | c     |      |       | c      |          |         |          |          |           |           |         |   |   |   |  |
| g            | 2299712      | c            | 2361153      | ns                         | g                                    | CFT073                     | +                          | c                 | g   | g   | c       | g     |          |          |      |    | g      | g     |         |      | g     |      |       | g      |          |         |          |          |           |           |         |   |   |   |  |
| c            | 2299990      | t            | 2361431      | s                          | t                                    | clone D                    | +                          | t                 | t   | t   | t       | t     |          |          |      |    | t      | c     |         |      | t     |      |       | t      |          |         |          |          |           |           |         |   |   |   |  |
| g            | 2300703      | a            | 2362144      | s                          | a                                    | clone D                    | +                          | a                 | a   | a   | a       | a     |          |          |      |    | a      | a     |         |      | a     |      |       | a      |          |         |          |          |           |           |         |   |   |   |  |
| t            | 2300793      | c            | 2362234      | s                          | c                                    | clone D                    | +                          | c                 | c   | c   | c       | c     |          |          |      |    | c      | t     |         |      | c     |      |       | c      |          |         |          |          |           |           |         |   |   |   |  |
| t            | 2309336      | c            | 2370777      | nc                         | t                                    | CFT073                     | ++                         | t                 | t   | t   | c       | t     | c        | t        | t    | t  | t      | c     | t       | t    | t     | t    | t     | t      | t        |         |          | t        | t         | t         |         |   |   |   |  |
| g            | 2315229      | a            | 2376670      | s                          | g                                    | CFT073                     | ++++                       | g                 | g   | g   | g       | g     | g        | g        | g    | g  | g      | g     | g       | g    | g     | g    | g     | g      | g        | g       | g        | g        | g         | g         | g       | g | g | g |  |
| g            | 2320221      | a            | 2381662      | s                          | g                                    | CFT073                     | ++++                       | g                 | g   | g   | g       | g     | g        | g        | g    | g  | g      | g     | g       | g    | g     | g    | g     | g      | g        | g       | g        | g        | g         | g         | g       | g | g | g |  |
| t            | 2336808      | c            | 2398250      | ns                         | t                                    | CFT073                     | +                          | t                 |     |     |         |       |          |          |      |    |        |       |         |      |       |      |       |        |          |         |          |          |           |           |         |   |   |   |  |
| t            | 2339703      | g            | 2401145      | ns                         | t                                    | CFT073                     | ++++                       | t                 | t   | t   | t       | t     | t        | t        | t    | t  | t      | t     | t       | t    | t     | t    | t     | t      | t        | t       | t        | t        | t         | t         | t       | t | t | t |  |
| c            | 2345037      | t            | 2406286      | s                          | t                                    | clone D                    | ++                         | t                 | t   | t   | t       | t     | t        | t        | t    | t  | t      | t     | t       | t    | t     | t    | t     | t      | t        | t       | t        |          |           | t         | t       | t |   |   |  |









| Clone D base | Clone D site | CFT 073 base | CFT 073 site | mutation type <sup>a</sup> | Inferred ancestral base <sup>b</sup> | lineage inferred to mutate | Support level <sup>c</sup> | ED1a <sup>d</sup> | 536 | S88 | APEC O1 | UT189 | E2348/69 | ATCC8739 | K-12 | HS | SMS3-5 | IAI39 | E24377A | SE11 | 55989 | IAI1 | Sakai | UMN026 | B4 Sb227 | F5 8401 | SS Ss046 | D1 Sd197 | B18 BS512 | F2a 2457T | F2a 301 |   |
|--------------|--------------|--------------|--------------|----------------------------|--------------------------------------|----------------------------|----------------------------|-------------------|-----|-----|---------|-------|----------|----------|------|----|--------|-------|---------|------|-------|------|-------|--------|----------|---------|----------|----------|-----------|-----------|---------|---|
| t            | 2929257      | a            | 2992254      | nc                         | t                                    | CFT073                     | ++++                       | t                 | t   | t   | t       | t     | t        | a        | a    | a  | t      | t     | a       | a    | a     | a    | t     | t      | t        | t       | t        | t        | a         | t         | t       |   |
| c            | 2929266      | t            | 2992263      | nc                         | c                                    | CFT073                     | ++++                       | c                 | t   | c   | t       | c     | c        | t        | t    | t  | c      | c     | t       | t    | t     | t    | c     | c      | t        | c       | c        | c        | t         | c         | c       | c |
| t            | 2929267      | c            | 2992264      | nc                         | t                                    | CFT073                     | ++++                       | t                 | t   | t   | c       | t     | t        | c        | c    | c  | t      | t     | c       | c    | c     | c    | t     | t      | c        | t       | t        | t        | t         | c         | t       | t |
| c            | 2929475      | a            | 2992471      | nc                         | c                                    | CFT073                     | ++++                       | c                 | c   | c   | c       | c     | c        | c        | c    | c  | c      | c     | c       | c    | c     | c    | c     | c      | c        | c       | c        | c        | c         | c         | c       | c |
| g            | 2930220      | c            | 2993220      | nc                         | g                                    | CFT073                     | ++++                       | g                 | g   | g   | c       | g     | g        | g        | g    | g  | g      | g     | g       | g    | g     | g    | g     | g      | g        | g       | g        | g        | g         | g         | g       | g |
| g            | 2930451      | c            | 2993455      | nc                         | g                                    | CFT073                     | ++++                       | g                 | g   | g   | c       | g     | g        | g        | g    | g  | g      | g     | g       | g    | g     | g    | g     | g      | g        | g       | g        | g        | g         | g         | g       | g |
| g            | 2955443      | a            | 3018449      | nc                         | g                                    | CFT073                     | ++++                       | g                 | g   | g   | g       | g     | g        | g        | g    | g  | g      | g     | g       | g    | g     | g    | g     | g      | g        | g       | g        | g        | g         | g         | g       | g |
| g            | 2955497      | a            | 3018503      | nc                         | g                                    | CFT073                     | ++++                       | g                 | g   | g   | g       | g     | g        | g        | g    | g  | g      | g     | g       | g    | g     | g    | g     | g      | g        | g       | g        | g        | g         | g         | g       | g |
| g            | 2962639      | a            | 3074078      | ns                         | g                                    | CFT073                     | ++++                       | g                 | g   | g   | g       | g     | g        | g        | g    | g  | g      | g     | g       | g    | g     | g    | g     | g      | g        | g       | g        | g        | g         | g         | g       | g |
| a            | 2966998      | t            | 3078437      | ns                         | t                                    | clone D                    | ++++                       | t                 | t   | t   | t       | t     | t        | t        | t    | t  | t      | t     | t       | t    | t     | t    | t     | t      | t        | t       | t        | t        | t         | t         | t       | t |
| t            | 2968995      | c            | 3080434      | s                          | c                                    | clone D                    | ++                         | c                 | c   | c   | c       | c     | c        |          |      |    | c      | c     |         |      |       |      | c     | c      |          |         |          |          | c         |           |         |   |
| a            | 2995994      | g            | 3107433      | s                          | g                                    | clone D                    | ++++                       | g                 | g   | g   | g       | g     | g        | g        | g    | g  | g      | g     | g       | g    | g     | g    | g     | g      | g        | g       | g        | g        | g         | g         | g       | g |
| t            | 3029683      | c            | 3141123      | s                          | c                                    | clone D                    | ++                         | c                 | c   | c   | c       |       | c        |          | c    | c  | c      | c     | c       | c    | c     | c    | c     | c      | c        | c       | c        | c        | c         | c         | c       | c |
| t            | 3061684      | g            | 3173132      | ns                         | t                                    | CFT073                     | ++                         | t                 | t   | t   | t       | t     | t        | t        | t    | t  | t      | t     | t       | t    | t     | t    | t     | t      |          |         | t        | t        |           |           |         |   |
| g            | 3065845      | a            | 3177293      | nc                         | g                                    | CFT073                     | ++                         | g                 |     | g   | g       | g     |          | g        | g    | g  |        |       | g       | g    | g     | g    | g     | g      | g        | g       |          | g        |           | g         |         |   |
| c            | 3067813      | a            | 3179261      | ns                         | c                                    | CFT073                     | ++                         | c                 | c   | c   | c       | c     |          |          |      |    | c      |       |         |      |       |      | c     | c      | c        |         |          |          | c         |           |         |   |
| c            | 3082607      | t            | 3194070      | ns                         | c                                    | CFT073                     | ++++                       | c                 | c   | c   | c       | c     | c        | c        | c    | c  | c      | c     | c       | c    | c     | c    | c     | t      | c        | t       | c        | c        | c         | c         | t       | t |
| a            | 3086823      | g            | 3198288      | ns                         | a                                    | CFT073                     | ++++                       | a                 | a   | a   | a       | a     | a        | a        | a    | a  | a      | a     | a       | a    | a     | a    | a     | a      | a        | a       | a        | a        | a         | a         | a       | a |
| t            | 3098292      | g            | 3209757      | ns                         | t                                    | CFT073                     | ++++                       | t                 | t   | t   | t       | t     | t        | t        | t    | t  | t      | t     | t       | t    | t     | t    | t     | t      | t        | t       | t        | t        |           | t         | t       |   |
| c            | 3115270      | t            | 3226734      | s                          | c                                    | CFT073                     | ++                         |                   | c   | c   | c       | c     |          |          |      |    |        |       |         | c    |       |      |       |        |          |         |          |          |           |           |         |   |
| a            | 3116851      | c            | 3228315      | s                          | a                                    | CFT073                     | ++                         |                   | a   | a   | a       | a     |          |          |      |    |        |       | a       |      |       |      |       |        |          |         |          |          |           |           |         |   |
| a            | 3128970      | g            | 3240434      | ns                         | g                                    | clone D                    | ++                         |                   | g   | g   | g       | g     |          |          |      |    |        |       |         |      |       |      |       |        |          |         |          |          |           |           |         |   |
| c            | 3132900      | t            | 3244364      | s                          | t                                    | clone D                    | ++                         |                   | c   | t   | t       | t     |          |          |      |    |        |       |         |      |       |      |       |        |          |         |          |          |           |           |         |   |
| t            | 3155664      | g            | 3267126      | ns                         | g                                    | clone D                    | ++++                       | g                 | g   | g   | g       | g     | g        | g        | g    | g  | g      | g     | g       | g    | g     | g    | g     | g      | g        | g       | g        | g        | g         | g         | g       | g |
| a            | 3168315      | c            | 3279777      | ns                         | a                                    | CFT073                     | ++++                       | a                 | a   | a   | a       | a     | a        | a        | a    | a  | a      | a     | a       | a    | a     | a    | c     | a      | a        | a       | a        | a        | a         | a         | a       | a |
| g            | 3180307      | a            | 3292480      | s                          | g                                    | CFT073                     | ++++                       | g                 | g   | g   | g       | g     | g        | g        | g    | g  | g      | g     | g       | g    | g     | g    | g     | g      | g        | g       | g        |          | g         | g         | g       | g |
| g            | 3185198      | a            | 3297371      | ns                         | g                                    | CFT073                     | ++                         | g                 | g   | g   | g       | g     | g        | g        | g    | g  | g      | g     | g       | g    | g     | g    | g     | g      | g        | g       | g        |          |           | g         | g       | g |
| a            | 3187493      | g            | 3299666      | s                          | a                                    | CFT073                     | ++                         | a                 | a   | a   | a       | a     | a        | a        | a    | a  | a      | a     | a       | a    | a     | a    | a     | a      | a        | a       | a        |          |           | a         | a       | a |

| Clone D base | Clone D site | CFT 073 base | CFT 073 site | mutation type <sup>a</sup> | Inferred ancestral base <sup>b</sup> | lineage inferred to mutate | Support level <sup>c</sup> | ED1a <sup>d</sup> | 536 | S88 | APEC O1 | UT189 | E2348/69 | ATCC8739 | K-12 | HS | SMS3-5 | IAI39 | E24377A | SE11 | 55989 | IAI1 | Sakai | UMN026 | B4 Sb227 | F5 8401 | SS Ss046 | D1 Sd197 | B18 BS512 | F2a 2457T | F2a 301 |
|--------------|--------------|--------------|--------------|----------------------------|--------------------------------------|----------------------------|----------------------------|-------------------|-----|-----|---------|-------|----------|----------|------|----|--------|-------|---------|------|-------|------|-------|--------|----------|---------|----------|----------|-----------|-----------|---------|
| a            | 3196692      | g            | 3308865      | nc                         | g                                    | clone D                    | ++++                       | g                 | g   | g   | g       | g     | g        | g        | g    | g  | g      | g     | g       | g    | g     | g    | g     | g      | g        | g       |          |          |           |           |         |
| t            | 3216776      | c            | 3328949      | s                          | c                                    | clone D                    | ++                         | c                 | t   | c   | c       | c     | c        | c        | c    | c  | c      | c     | c       | c    | c     | c    | c     | c      | c        | c       | c        |          |           | c         | c       |
| t            | 3237513      | c            | 3350397      | s                          | c                                    | clone D                    | ++++                       | c                 | c   | c   | c       | c     | c        | c        | c    | c  | c      | c     | c       | c    | c     | c    | c     | c      | c        | c       | c        | c        | c         | c         | c       |
| t            | 3255888      | a            | 3368772      | s                          | t                                    | CFT073                     | ++++                       | t                 | t   | t   | t       | t     | t        | t        | t    | t  | t      | t     | t       | t    | t     | t    | t     | t      | t        | t       | t        | t        | t         | t         | t       |
| g            | 3256744      | a            | 3369628      | ns                         | g                                    | CFT073                     | ++++                       | g                 | g   | g   | g       | g     | g        | g        | g    | g  | g      | g     | g       | g    | g     | g    | g     | g      | g        | g       |          | g        | g         | g         | g       |
| a            | 3261350      | t            | 3374232      | s                          | t                                    | clone D                    | ++                         | t                 | t   | t   | t       | t     | t        |          |      |    | t      | t     |         |      |       |      |       | t      |          | t       |          |          | t         | t         |         |
| g            | 3261353      | a            | 3374233      | ns                         | a                                    | clone D                    | ++                         | a                 | a   | a   | a       | a     | a        |          |      |    | a      | a     |         |      |       |      |       | a      |          | a       |          |          | a         | a         |         |
| g            | 3266500      | a            | 3379379      | s                          | g                                    | CFT073                     | ++                         | g                 | g   | g   | g       | g     | g        |          |      |    | t      | g     | g       | g    | g     | g    | g     | g      |          | g       |          | g        | g         | g         |         |
| c            | 3269374      | a            | 3382253      | nc                         | c                                    | CFT073                     | ++++                       | c                 | c   | c   | c       | c     | c        | c        | c    | c  | c      | c     | c       | c    | c     | c    | c     | c      | c        | c       | c        | c        | c         | c         | c       |
| c            | 3269377      | g            | 3382256      | nc                         | c                                    | CFT073                     | ++++                       | c                 | c   | c   | c       | c     | c        | c        | c    | c  | c      | c     | c       | c    | c     | c    | c     | c      | c        | c       | c        | c        | c         | c         | c       |
| t            | 3275727      | c            | 3388606      | s                          | t                                    | CFT073                     | ++++                       | t                 | t   | t   | t       | t     | c        | c        | c    | c  | c      | c     | c       | c    | c     | c    | c     | c      | c        | c       | c        | c        | c         | c         | c       |
| t            | 3293438      | c            | 3406317      | nc                         | c                                    | clone D                    | ++                         | c                 | c   | c   | c       |       | c        | c        |      |    |        | c     | c       |      | c     |      | c     | c      | c        | c       | c        | c        | c         | c         | c       |
| t            | 3294224      | c            | 3407103      | s                          | t                                    | CFT073                     | ++                         | t                 | c   | c   | c       |       | c        | t        |      |    |        | c     | c       |      | c     |      | c     | t      | c        | c       |          | c        | c         | t         | t       |
| g            | 3294230      | t            | 3407109      | s                          | g                                    | CFT073                     | ++                         | g                 | g   | t   | t       |       | t        | g        |      |    |        | t     | g       |      | g     |      | t     | g      | t        | t       |          | t        | g         | g         |         |
| c            | 3294242      | t            | 3407121      | s                          | c                                    | CFT073                     | ++                         | c                 | c   | c   | c       |       | c        | c        |      |    |        | c     | c       |      | c     |      | c     | c      | c        | c       |          | c        | c         | c         | c       |
| g            | 3294267      | a            | 3407146      | ns                         | g                                    | CFT073                     | ++                         | g                 | g   | a   | a       |       | g        | g        |      |    |        | a     | g       |      | g     |      | g     | g      | g        |         | g        |          | g         | g         | g       |
| g            | 3294270      | a            | 3407149      | ns                         | g                                    | CFT073                     | ++                         | g                 | g   | a   | a       |       | a        | g        |      |    |        | a     | g       |      | g     |      | a     | g      | a        |         | a        |          | a         | g         | g       |
| c            | 3294281      | t            | 3407160      | s                          | c                                    | CFT073                     | ++                         | c                 | c   | g   | g       |       | g        | c        |      |    |        | g     | c       |      | c     |      | g     | c      | g        |         | g        |          | g         | c         | c       |
| a            | 3294296      | g            | 3407175      | s                          | a                                    | CFT073                     | ++                         | a                 | g   | g   | g       |       | g        | a        |      |    |        | g     | g       |      | g     |      | g     | a      | g        |         | g        |          | g         | a         | a       |
| g            | 3294299      | t            | 3407178      | s                          | g                                    | CFT073                     | ++                         | g                 | t   | t   | t       |       | t        | g        |      |    |        | t     | t       |      | t     |      | t     | g      | t        |         | t        |          | t         | g         | g       |
| a            | 3294302      | t            | 3407181      | s                          | a                                    | CFT073                     | ++                         | a                 | c   | c   | c       |       | c        | a        |      |    |        | c     | c       |      | c     |      | c     | a      | c        |         | c        |          | c         | a         | a       |
| t            | 3294332      | c            | 3407211      | s                          | t                                    | CFT073                     | ++                         | t                 | t   | t   | t       |       | t        | t        |      |    |        | t     | t       |      | t     |      | t     | t      | t        |         | t        |          | t         | t         | t       |
| g            | 3294408      | a            | 3407287      | ns                         | g                                    | CFT073                     | ++                         | g                 | g   | g   | g       |       | g        | g        |      |    |        | g     | g       |      | g     |      | g     | g      | g        |         | g        |          | g         | g         | g       |
| t            | 3294431      | c            | 3407310      | s                          | t                                    | CFT073                     | ++                         | t                 | c   | c   | c       |       | c        | t        |      |    |        | c     | c       |      | c     |      | c     | t      | c        |         | c        |          | c         | c         | c       |
| t            | 3294435      | c            | 3407314      | ns                         | t                                    | CFT073                     | ++                         | t                 | c   | c   | c       |       | c        | t        |      |    |        | c     | c       |      | c     |      | c     | t      | c        |         | c        |          | c         | c         | c       |
| t            | 3295195      | c            | 3408074      | ns                         | c                                    | clone D                    | +                          |                   |     | c   | c       |       |          |          |      |    |        | c     |         |      |       |      |       | c      |          | c       | c        | c        |           | c         | c       |
| c            | 3295338      | t            | 3408217      | ns                         | c                                    | CFT073                     | +                          |                   |     | c   | c       |       |          |          |      |    |        | c     |         |      |       |      |       | c      |          | c       | c        | c        |           | c         | c       |
| t            | 3295341      | c            | 3408220      | s                          | c                                    | clone D                    | +                          |                   |     | t   | t       |       |          |          |      |    |        | t     |         |      |       |      |       | t      |          | c       | c        | c        |           | c         | c       |



| Clone D base | Clone D site | CFT 073 base | CFT 073 site | mutation type <sup>a</sup> | Inferred ancestral base <sup>b</sup> | lineage inferred to mutate | Support level <sup>c</sup> | ED1a <sup>d</sup> | 536 | S88 | APEC O1 | UT189 | E2348/69 | ATCC8739 | K-12 | HS | SMS3-5 | IAI39 | E24377A | SE11 | 55989 | IAI1 | Sakai | UMN026 | B4 Sb227 | F5 8401 | SS Ss046 | D1 Sd197 | B18 BS512 | F2a 2457T | F2a 301 |
|--------------|--------------|--------------|--------------|----------------------------|--------------------------------------|----------------------------|----------------------------|-------------------|-----|-----|---------|-------|----------|----------|------|----|--------|-------|---------|------|-------|------|-------|--------|----------|---------|----------|----------|-----------|-----------|---------|
| t            | 3298303      | c            | 3429205      | s                          | t                                    | CFT073                     | +                          | c                 | t   | t   | t       |       |          |          |      |    |        |       | t       |      |       |      |       | c      |          |         |          |          |           |           |         |
| a            | 3298472      | g            | 3429374      | nc                         | a                                    | CFT073                     | +                          | g                 | a   | a   | g       |       |          |          |      |    |        |       | a       |      |       |      |       | g      |          |         |          |          |           |           |         |
| g            | 3298487      | a            | 3429389      | nc                         | g                                    | CFT073                     | +                          | a                 | g   | g   | a       |       |          |          |      |    |        |       | g       |      |       |      |       | a      |          |         |          |          |           |           |         |
| a            | 3298490      | t            | 3429392      | nc                         | a                                    | CFT073                     | +                          | t                 | a   | a   | t       |       |          |          |      |    |        |       | a       |      |       |      |       | t      |          |         |          |          |           |           |         |
| t            | 3298494      | a            | 3429396      | nc                         | t                                    | CFT073                     | +                          | a                 | t   | t   | a       |       |          |          |      |    |        |       | t       |      |       |      |       | a      |          |         |          |          |           |           |         |
| a            | 3298495      | t            | 3429397      | nc                         | a                                    | CFT073                     | +                          | t                 | a   | a   | t       |       |          |          |      |    |        |       | a       |      |       |      |       | t      |          |         |          |          |           |           |         |
| g            | 3298496      | a            | 3429398      | nc                         | g                                    | CFT073                     | +                          | a                 | g   | g   | a       |       |          |          |      |    |        |       | g       |      |       |      |       | a      |          |         |          |          |           |           |         |
| c            | 3298498      | t            | 3429400      | nc                         | c                                    | CFT073                     | +                          | c                 | c   | c   | c       |       |          |          |      |    |        |       | c       |      |       |      |       | t      |          |         |          |          |           |           |         |
| g            | 3298501      | t            | 3429403      | nc                         | g                                    | CFT073                     | +                          | g                 | g   | g   | g       |       |          |          |      |    |        |       | g       |      |       |      |       | t      |          |         |          |          |           |           |         |
| g            | 3298505      | a            | 3429408      | nc                         | g                                    | CFT073                     | +                          | a                 | g   | g   | a       |       |          |          |      |    |        |       | g       |      |       |      |       | a      |          |         |          |          |           |           |         |
| g            | 3298512      | a            | 3429415      | nc                         | g                                    | CFT073                     | +                          | a                 | g   | g   | a       |       |          |          |      |    |        |       | g       |      |       |      |       | a      |          |         |          |          |           |           |         |
| g            | 3298524      | t            | 3429427      | nc                         | g                                    | CFT073                     | +                          | t                 | g   | g   | t       |       |          |          |      |    |        |       | g       |      |       |      |       | t      |          |         |          |          |           |           |         |
| g            | 3298528      | a            | 3429431      | nc                         | g                                    | CFT073                     | +                          | a                 | g   | g   | a       |       |          |          |      |    |        |       | g       |      |       |      |       | a      |          |         |          |          |           |           |         |
| a            | 3299818      | t            | 3437355      | nc                         | a                                    | CFT073                     | +                          | t                 | a   | a   | a       |       |          |          |      |    |        |       | a       |      |       |      |       | t      |          |         |          |          |           |           |         |
| g            | 3299820      | c            | 3437357      | nc                         | g                                    | CFT073                     | +                          | t                 | g   | g   | g       |       |          |          |      |    |        |       | g       |      |       |      |       | c      |          |         |          |          |           |           |         |
| c            | 3299821      | t            | 3437358      | nc                         | c                                    | CFT073                     | +                          | c                 | c   | c   | c       |       |          |          |      |    |        |       | c       |      |       |      |       | t      |          |         |          |          |           |           |         |
| c            | 3299839      | t            | 3437376      | nc                         | c                                    | CFT073                     | +                          | c                 | c   | c   | c       |       |          |          |      |    |        |       | c       |      |       |      |       | t      |          |         |          |          |           |           |         |
| t            | 3299848      | a            | 3437385      | nc                         | t                                    | CFT073                     | +                          | t                 | t   | t   | t       |       |          |          |      |    |        |       | t       |      |       |      |       | a      |          |         |          |          |           |           |         |
| t            | 3299851      | c            | 3437388      | nc                         | c                                    | clone D                    | +                          | c                 | c   | c   | c       |       |          |          |      |    |        |       | c       |      |       |      |       | c      |          |         |          |          |           |           |         |
| t            | 3299853      | g            | 3437390      | nc                         | g                                    | clone D                    | +                          | g                 | g   | g   | g       |       |          |          |      |    |        |       | g       |      |       |      |       | g      |          |         |          |          |           |           |         |
| c            | 3299854      | a            | 3437391      | nc                         | a                                    | clone D                    | +                          | c                 | a   | a   | a       |       |          |          |      |    |        |       | a       |      |       |      |       | a      |          |         |          |          |           |           |         |
| t            | 3299855      | g            | 3437392      | nc                         | g                                    | clone D                    | +                          | g                 | g   | g   | g       |       |          |          |      |    |        |       | g       |      |       |      |       | g      |          |         |          |          |           |           |         |
| g            | 3299856      | c            | 3437393      | nc                         | c                                    | clone D                    | +                          | c                 | a   | a   | a       |       |          |          |      |    |        |       | a       |      |       |      |       | c      |          |         |          |          |           |           |         |
| g            | 3299858      | t            | 3437395      | nc                         | t                                    | clone D                    | +                          | t                 | -   | -   | -       |       |          |          |      |    |        |       | -       |      |       |      |       | t      |          |         |          |          |           |           |         |
| a            | 3299859      | c            | 3437396      | nc                         | c                                    | clone D                    | +                          | c                 | -   | -   | -       |       |          |          |      |    |        |       | -       |      |       |      |       | c      |          |         |          |          |           |           |         |
| g            | 3299863      | a            | 3437400      | nc                         | g                                    | CFT073                     | +                          | a                 | g   | g   | g       |       |          |          |      |    |        |       | g       |      |       |      |       | a      |          |         |          |          |           |           |         |
| t            | 3299865      | c            | 3437402      | nc                         | t                                    | CFT073                     | +                          | c                 | t   | t   | t       |       |          |          |      |    |        |       | t       |      |       |      |       | c      |          |         |          |          |           |           |         |
| g            | 3299866      | a            | 3437403      | nc                         | g                                    | CFT073                     | +                          | a                 | g   | g   | g       |       |          |          |      |    |        |       | g       |      |       |      |       | a      |          |         |          |          |           |           |         |

| Clone D base | Clone D site | CFT 073 base | CFT 073 site | mutation type <sup>a</sup> | Inferred ancestral base <sup>b</sup> | lineage inferred to mutate | Support level <sup>c</sup> | ED1a <sup>d</sup> | 536 | S88 | APEC O1 | UT189 | E2348/69 | ATCC8739 | K-12 | HS | SMS3-5 | IAI39 | E24377A | SE11 | 55989 | IAI1 | Sakai | UMN026 | B4 Sb227 | F5 8401 | SS Ss046 | D1 Sd197 | B18 BS512 | F2a 2457T | F2a 301 |
|--------------|--------------|--------------|--------------|----------------------------|--------------------------------------|----------------------------|----------------------------|-------------------|-----|-----|---------|-------|----------|----------|------|----|--------|-------|---------|------|-------|------|-------|--------|----------|---------|----------|----------|-----------|-----------|---------|
| a            | 3299872      | t            | 3437409      | nc                         | a                                    | CFT073                     | +                          | t                 | a   | a   | a       |       |          |          |      |    |        |       | a       |      |       |      |       | t      |          |         |          |          |           |           |         |
| a            | 3299878      | t            | 3437415      | nc                         | a                                    | CFT073                     | +                          | a                 | a   | a   | a       |       |          |          |      |    |        |       | a       |      |       |      |       | t      |          |         |          |          |           |           |         |
| a            | 3299881      | t            | 3437418      | nc                         | a                                    | CFT073                     | +                          | c                 | a   | a   | a       |       |          |          |      |    |        |       | a       |      |       |      |       | t      |          |         |          |          |           |           |         |
| g            | 3299896      | a            | 3437433      | nc                         | a                                    | clone D                    | +                          | a                 | a   | a   | a       | g     |          |          |      |    |        |       | g       |      |       |      |       | a      |          |         |          |          |           |           |         |
| c            | 3299903      | t            | 3437440      | nc                         | t                                    | clone D                    | +                          | t                 | t   | t   | c       |       |          |          |      |    |        |       | c       |      |       |      |       | t      |          |         |          |          |           |           |         |
| t            | 3299917      | a            | 3437454      | nc                         | t                                    | CFT073                     | +                          | a                 | t   | t   | t       |       |          |          |      |    |        |       | t       |      |       |      |       | -      |          |         |          |          |           |           |         |
| g            | 3299921      | a            | 3437458      | nc                         | a                                    | clone D                    | +                          | a                 | a   | a   | a       | g     |          |          |      |    |        |       | g       |      |       |      |       | -      |          |         |          |          |           |           |         |
| a            | 3299927      | g            | 3437464      | nc                         | g                                    | clone D                    | +                          | g                 | g   | g   | g       |       |          |          |      |    |        |       | a       |      |       |      |       | g      |          |         |          |          |           |           |         |
| t            | 3299937      | a            | 3437474      | nc                         | t                                    | CFT073                     | +                          | t                 | t   | t   | t       |       |          |          |      |    |        |       | t       |      |       |      |       | t      |          |         |          |          |           |           |         |
| a            | 3299939      | g            | 3437476      | nc                         | a                                    | CFT073                     | +                          | a                 | a   | a   | a       |       |          |          |      |    |        |       | a       |      |       |      |       | g      |          |         |          |          |           |           |         |
| c            | 3300156      | t            | 3437692      | nc                         | t                                    | clone D                    | +                          | t                 | t   | t   | t       |       |          |          |      |    |        |       | c       |      |       |      |       | t      |          |         |          |          |           |           |         |
| t            | 3300217      | g            | 3437753      | nc                         | t                                    | CFT073                     | +                          | c                 | c   | c   | c       |       |          |          |      |    |        |       | t       |      |       |      |       | c      |          |         |          |          |           |           |         |
| g            | 3300438      | c            | 3437975      | s                          | g                                    | CFT073                     | +                          | g                 | g   | g   | g       |       |          |          |      |    |        |       | g       |      |       |      |       | c      |          |         |          |          |           |           |         |
| a            | 3300442      | g            | 3437979      | ns                         | g                                    | clone D                    | +                          | g                 | g   | g   | g       |       |          |          |      |    |        |       | a       |      |       |      |       | g      |          |         |          |          |           |           |         |
| c            | 3300450      | t            | 3437987      | s                          | t                                    | clone D                    | +                          | t                 | t   | t   | t       |       |          |          |      |    |        |       | c       |      |       |      |       | t      |          |         |          |          |           |           |         |
| c            | 3300651      | t            | 3438188      | nc                         | t                                    | clone D                    | +                          | c                 | t   | t   | c       |       |          |          |      |    |        |       | t       |      |       |      |       | t      |          |         |          |          |           |           |         |
| t            | 3300656      | c            | 3438193      | nc                         | t                                    | CFT073                     | +                          | t                 | t   | t   | t       |       |          |          |      |    |        |       | t       |      |       |      |       | c      |          |         |          |          |           |           |         |
| t            | 3300661      | c            | 3438198      | nc                         | c                                    | clone D                    | +                          | c                 | c   | c   | c       |       |          |          |      |    |        |       | t       |      |       |      |       | c      |          |         |          |          |           |           |         |
| t            | 3300662      | a            | 3438199      | nc                         | a                                    | clone D                    | +                          | a                 | a   | a   | a       |       |          |          |      |    |        |       | a       |      |       |      |       | a      |          |         |          |          |           |           |         |
| c            | 3300667      | t            | 3438204      | nc                         | c                                    | CFT073                     | +                          | c                 | t   | t   | c       |       |          |          |      |    |        |       | c       |      |       |      |       | t      |          |         |          |          |           |           |         |
| a            | 3300669      | g            | 3438206      | nc                         | a                                    | CFT073                     | +                          | a                 | a   | a   | a       |       |          |          |      |    |        |       | a       |      |       |      |       | g      |          |         |          |          |           |           |         |
| a            | 3300675      | g            | 3438212      | nc                         | a                                    | CFT073                     | +                          | a                 | a   | a   | a       |       |          |          |      |    |        |       | a       |      |       |      |       | g      |          |         |          |          |           |           |         |
| t            | 3300676      | g            | 3438213      | nc                         | t                                    | CFT073                     | +                          | t                 | t   | t   | t       |       |          |          |      |    |        |       | t       |      |       |      |       | g      |          |         |          |          |           |           |         |
| a            | 3300677      | g            | 3438214      | nc                         | a                                    | CFT073                     | +                          | a                 | g   | g   | a       |       |          |          |      |    |        |       | a       |      |       |      |       | g      |          |         |          |          |           |           |         |
| c            | 3300678      | t            | 3438215      | nc                         | c                                    | CFT073                     | +                          | c                 | c   | c   | c       |       |          |          |      |    |        |       | c       |      |       |      |       | t      |          |         |          |          |           |           |         |
| t            | 3300700      | c            | 3438237      | nc                         | t                                    | CFT073                     | +                          | t                 | t   | t   | t       |       |          |          |      |    |        |       | t       |      |       |      |       | c      |          |         |          |          |           |           |         |
| c            | 3300736      | a            | 3438273      | nc                         | c                                    | CFT073                     | +                          | c                 | c   | c   | c       |       |          |          |      |    |        |       | c       |      |       |      |       | a      |          |         |          |          |           |           |         |
| a            | 3300758      | g            | 3438295      | nc                         | a                                    | CFT073                     | +                          | a                 | a   | a   | a       |       |          |          |      |    |        |       | a       |      |       |      |       | g      |          |         |          |          |           |           |         |









| Clone D base | Clone D site | CFT 073 base | CFT 073 site | mutation type <sup>a</sup> | Inferred ancestral base <sup>b</sup> | lineage inferred to mutate | Support level <sup>c</sup> | ED1a <sup>d</sup> | 536 | S88 | APEC O1 | UT189 | E2348/69 | ATCC8739 | K-12 | HS | SMS3-5 | IAI39 | E24377A | SE11 | 55989 | IAI1 | Sakai | UMN026 | B4 Sb227 | F5 8401 | SS Ss046 | D1 Sd197 | B18 BS512 | F2a 2457T | F2a 301 |
|--------------|--------------|--------------|--------------|----------------------------|--------------------------------------|----------------------------|----------------------------|-------------------|-----|-----|---------|-------|----------|----------|------|----|--------|-------|---------|------|-------|------|-------|--------|----------|---------|----------|----------|-----------|-----------|---------|
| t            | 3307731      | c            | 3444865      | s                          | ?                                    | ?                          | +/-                        | a                 |     |     |         |       |          |          |      |    |        |       |         |      |       |      |       | g      |          |         |          |          |           |           |         |
| g            | 3307764      | a            | 3444898      | s                          | g                                    | CFT073                     | ++                         | g                 |     |     |         |       |          |          |      |    |        |       |         |      |       |      |       | g      |          |         |          |          |           |           |         |
| a            | 3307818      | t            | 3444952      | s                          | ?                                    | ?                          | +/-                        | g                 |     |     |         |       |          |          |      |    |        |       |         |      |       |      |       | g      |          |         |          |          |           |           |         |
| t            | 3307824      | c            | 3444958      | s                          | ?                                    | ?                          | +/-                        | a                 |     |     |         |       |          |          |      |    |        |       |         |      |       |      |       | a      |          |         |          |          |           |           |         |
| a            | 3307866      | g            | 3445000      | s                          | ?                                    | ?                          | ++                         | t                 |     |     |         |       |          |          |      |    |        |       |         |      |       |      |       | t      |          |         |          |          |           |           |         |
| t            | 3307881      | c            | 3445015      | s                          | c                                    | clone D                    | ++                         | c                 |     |     |         |       |          |          |      |    |        |       |         |      |       |      |       | c      |          |         |          |          |           |           |         |
| g            | 3307886      | a            | 3445020      | ns                         | a                                    | clone D                    | ++                         | a                 |     |     |         |       |          |          |      |    |        |       |         |      |       |      |       | a      |          |         |          |          |           |           |         |
| g            | 3307908      | a            | 3445042      | s                          | ?                                    | ?                          | +/-                        | c                 |     |     |         |       |          |          |      |    |        |       |         |      |       |      |       | c      |          |         |          |          |           |           |         |
| g            | 3307944      | t            | 3445078      | s                          | ?                                    | ?                          | +/-                        | a                 |     |     |         |       |          |          |      |    |        |       |         |      |       |      |       | a      |          |         |          |          |           |           |         |
| t            | 3307956      | c            | 3445090      | s                          | ?                                    | ?                          | +/-                        | g                 |     |     |         |       |          |          |      |    |        |       |         |      |       |      |       | g      |          |         |          |          |           |           |         |
| a            | 3307966      | c            | 3445100      | s                          | c                                    | clone D                    | ++                         | c                 |     |     |         |       |          |          |      |    |        |       |         |      |       |      |       | c      |          |         |          |          |           |           |         |
| a            | 3307998      | g            | 3445132      | s                          | ?                                    | ?                          | +/-                        | c                 |     |     |         |       |          |          |      |    |        |       |         |      |       |      |       | c      |          |         |          |          |           |           |         |
| a            | 3308022      | c            | 3445156      | s                          | ?                                    | ?                          | +/-                        | t                 |     |     |         |       |          |          |      |    |        |       |         |      |       |      |       | t      |          |         |          |          |           |           |         |
| g            | 3308073      | a            | 3445207      | ns                         | ?                                    | ?                          | ++                         | t                 |     |     |         |       |          |          |      |    |        |       |         |      |       |      |       | t      |          |         |          |          |           |           |         |
| c            | 3308155      | t            | 3445289      | s                          | t                                    | clone D                    | ++                         | t                 |     |     |         |       |          |          |      |    |        |       |         |      |       |      |       | t      |          |         |          |          |           |           |         |
| t            | 3308191      | c            | 3445325      | ns                         | c                                    | clone D                    | ++                         | c                 |     |     |         |       |          |          |      |    |        |       |         |      |       |      |       | c      |          |         |          |          |           |           |         |
| a            | 3308197      | t            | 3445331      | ns                         | ?                                    | ?                          | +/-                        | g                 |     |     |         |       |          |          |      |    |        |       |         |      |       |      |       | g      |          |         |          |          |           |           |         |
| g            | 3308200      | a            | 3445334      | ns                         | ?                                    | ?                          | +/-                        | t                 |     |     |         |       |          |          |      |    |        |       |         |      |       |      |       | t      |          |         |          |          |           |           |         |
| g            | 3308220      | a            | 3445354      | s                          | a                                    | clone D                    | ++                         | a                 |     |     |         |       |          |          |      |    |        |       |         |      |       |      |       | a      |          |         |          |          |           |           |         |
| c            | 3308660      | t            | 3445794      | nc                         | c                                    | CFT073                     | +                          | g                 |     |     |         |       |          |          |      |    |        |       |         |      |       |      |       |        |          |         |          |          |           |           |         |
| a            | 3308694      | g            | 3445828      | nc                         | a                                    | CFT073                     | +                          | t                 |     |     |         |       |          |          |      |    |        |       |         |      |       |      |       |        |          |         |          |          |           |           |         |
| t            | 3308827      | g            | 3445961      | s                          | g                                    | clone D                    | +                          | g                 |     |     |         |       |          |          |      |    |        |       |         |      |       |      |       |        |          |         |          |          |           |           |         |
| c            | 3309474      | a            | 3446608      | ns                         | c                                    | CFT073                     | +                          | c                 |     |     |         |       |          |          |      |    |        |       |         |      |       |      |       |        |          |         |          |          |           |           |         |
| t            | 3309942      | c            | 3447076      | ns                         | t                                    | CFT073                     | +                          |                   |     |     |         |       |          |          |      |    |        |       |         |      |       |      |       |        |          |         |          |          |           |           |         |
| g            | 3310139      | a            | 3447273      | ns                         | g                                    | CFT073                     | +                          |                   |     |     |         |       |          |          |      |    |        |       |         |      |       |      |       |        |          |         |          |          |           |           |         |
| a            | 3310171      | g            | 3447305      | s                          | a                                    | CFT073                     | +                          |                   |     |     |         |       |          |          |      |    |        |       |         |      |       |      |       |        |          |         |          |          |           |           |         |
| t            | 3310870      | c            | 3448004      | nc                         | t                                    | CFT073                     | +                          |                   |     |     |         |       |          |          |      |    |        |       |         |      |       |      |       |        |          |         |          |          |           |           |         |
| g            | 3311048      | t            | 3448182      | nc                         | t                                    | clone D                    | ++                         | t                 |     |     |         |       |          |          |      |    |        |       |         |      |       |      |       | t      | t        |         |          |          | t         |           |         |



| Clone D base | Clone D site | CFT 073 base | CFT 073 site | mutation type <sup>a</sup> | Inferred ancestral base <sup>b</sup> | lineage inferred to mutate | Support level <sup>c</sup> | ED1a <sup>d</sup> | 536 | S88 | APEC O1 | UT189 | E2348/69 | ATCC8739 | K-12 | HS | SMS3-5 | IAI39 | E24377A | SE11 | 55989 | IAI1 | Sakai | UMN026 | B4 Sb227 | F5 8401 | SS Ss046 | D1 Sd197 | B18 BS512 | F2a 2457T | F2a 301 |
|--------------|--------------|--------------|--------------|----------------------------|--------------------------------------|----------------------------|----------------------------|-------------------|-----|-----|---------|-------|----------|----------|------|----|--------|-------|---------|------|-------|------|-------|--------|----------|---------|----------|----------|-----------|-----------|---------|
| g            | 3320698      | a            | 3457724      | s                          | g                                    | CFT073                     | +                          |                   |     |     |         |       |          |          |      |    |        |       |         |      |       |      |       | a      |          |         |          |          |           | g         | g       |
| c            | 3320950      | t            | 3457976      | s                          | t                                    | clone D                    | +                          |                   |     |     |         |       |          |          |      |    |        |       | c       |      |       |      |       | t      |          |         |          |          |           | t         | t       |
| t            | 3321039      | c            | 3458065      | ns                         | t                                    | CFT073                     | +                          |                   |     |     |         |       |          |          |      |    |        |       | t       |      |       |      |       | c      |          |         |          |          |           | t         | t       |
| g            | 3321218      | a            | 3458244      | ns                         | g                                    | CFT073                     | +                          |                   |     |     |         |       |          |          |      |    |        |       | g       |      |       |      |       | a      |          |         |          |          |           | g         | g       |
| t            | 3321352      | a            | 3458378      | s                          | a                                    | clone D                    | +                          |                   |     |     |         |       |          |          |      |    |        |       | t       |      |       |      |       | a      |          |         |          |          | a         | a         |         |
| g            | 3321390      | a            | 3458416      | ns                         | a                                    | clone D                    | +                          |                   |     |     |         |       |          |          |      |    |        |       | g       |      |       |      |       | a      |          |         |          |          | a         | a         |         |
| c            | 3321403      | t            | 3458429      | s                          | c                                    | CFT073                     | +                          |                   |     |     |         |       |          |          |      |    |        |       | c       |      |       |      |       | c      |          |         |          |          | c         | c         |         |
| t            | 3321489      | a            | 3458515      | ns                         | t                                    | CFT073                     | +                          |                   |     |     |         |       |          |          |      |    |        |       | t       |      |       |      |       | a      |          |         |          |          | t         | t         |         |
| g            | 3321796      | a            | 3458822      | s                          | g                                    | CFT073                     | +                          |                   |     |     |         |       |          |          |      |    |        |       | g       |      |       |      |       | a      |          |         |          |          | g         | g         |         |
| t            | 3322170      | c            | 3459196      | ns                         | t                                    | CFT073                     | +                          |                   |     |     |         |       |          |          |      |    |        |       | t       |      |       |      |       | c      |          |         |          |          | t         | t         |         |
| t            | 3322270      | a            | 3459296      | s                          | a                                    | clone D                    | +                          |                   |     |     |         |       |          |          |      |    |        |       | t       |      |       |      |       | a      |          |         |          |          | a         | a         |         |
| t            | 3322805      | c            | 3459831      | ns                         | t                                    | CFT073                     | +                          |                   |     |     |         |       |          |          |      |    |        |       | t       |      |       |      |       | c      |          |         |          |          | t         | t         |         |
| a            | 3322831      | g            | 3459857      | s                          | a                                    | CFT073                     | +                          |                   |     |     |         |       |          |          |      |    |        |       | a       |      |       |      |       | g      |          |         |          |          | a         | a         |         |
| g            | 3323432      | a            | 3460458      | nc                         | g                                    | CFT073                     | +                          |                   |     |     |         |       |          |          |      |    |        |       | g       |      |       |      |       | g      |          |         |          |          | g         | g         |         |
| a            | 3323620      | t            | 3460646      | nc                         | t                                    | clone D                    | ++                         | t                 |     |     |         |       |          |          |      |    |        |       | t       |      |       |      |       | t      |          |         |          |          | t         | t         |         |
| g            | 3323879      | a            | 3460905      | nc                         | g                                    | CFT073                     | ++                         | g                 |     |     |         |       |          |          |      |    |        |       | g       |      |       |      |       | a      |          |         |          |          | g         | g         |         |
| c            | 3324164      | a            | 3461190      | nc                         | c                                    | CFT073                     | ++                         | c                 |     |     |         |       |          |          |      |    | c      | c     |         |      |       |      |       | a      | c        | c       | c        |          | c         | c         | c       |
| a            | 3324179      | t            | 3461205      | s                          | t                                    | clone D                    | ++                         | t                 |     |     |         |       |          |          |      |    | t      | a     |         |      |       |      |       | t      | t        | t       | t        |          | t         | t         | t       |
| t            | 3324208      | g            | 3461234      | s                          | g                                    | clone D                    | ++                         | g                 |     |     |         |       |          |          |      |    |        | t     | t       |      |       |      |       | g      | g        | g       | g        |          | g         | g         | g       |
| c            | 3324230      | a            | 3461256      | s                          | a                                    | clone D                    | ++                         | a                 |     |     |         |       |          |          |      |    |        | a     | c       |      |       |      |       | a      | a        | a       | a        |          | a         | a         | a       |
| t            | 3324233      | a            | 3461259      | s                          | a                                    | clone D                    | ++                         | a                 |     |     |         |       |          |          |      |    |        | a     | t       |      |       |      |       | a      | a        | a       | a        |          | a         | a         | a       |
| t            | 3324260      | a            | 3461286      | s                          | a                                    | clone D                    | ++                         | a                 |     |     |         |       |          |          |      |    |        | t     | t       |      |       |      |       | a      | a        | a       | a        |          | a         | a         | a       |
| c            | 3324272      | t            | 3461298      | s                          | t                                    | clone D                    | ++                         | t                 |     |     |         |       |          |          |      |    |        | c     | c       |      |       |      |       | t      | t        | t       | t        |          | t         | t         | t       |
| g            | 3324287      | a            | 3461313      | s                          | a                                    | clone D                    | ++                         | a                 |     |     |         |       |          |          |      |    |        | g     | g       |      |       |      |       | a      | a        | a       | a        |          | a         | a         | a       |
| t            | 3324308      | c            | 3461334      | s                          | c                                    | clone D                    | ++                         | c                 |     |     |         |       |          |          |      |    |        | t     | t       |      |       |      |       | c      | c        | c       | c        |          | c         | c         | c       |
| t            | 3324313      | c            | 3461339      | ns                         | c                                    | clone D                    | ++                         | c                 |     |     |         |       |          |          |      |    |        | t     | t       |      |       |      |       | c      | c        | c       | c        |          | c         | c         | c       |
| a            | 3324329      | t            | 3461355      | s                          | t                                    | clone D                    | ++                         | t                 |     |     |         |       |          |          |      |    |        | a     | a       |      |       |      |       | t      | t        | t       | t        |          | t         | t         | t       |
| a            | 3324344      | c            | 3461370      | ns                         | c                                    | clone D                    | ++                         | c                 |     |     |         |       |          |          |      |    |        | a     | a       |      |       |      |       | c      | c        | c       | c        |          | c         | c         | c       |



| Clone D base | Clone D site | CFT 073 base | CFT 073 site | mutation type <sup>a</sup> | Inferred ancestral base <sup>b</sup> | lineage inferred to mutate | Support level <sup>c</sup> | ED1a <sup>d</sup> | 536 | S88 | APEC O1 | UT189 | E2348/69 | ATCC8739 | K-12 | HS | SMS3-5 | IAI39 | E24377A | SE11 | 55989 | IAI1 | Sakai | UMN026 | B4 Sb227 | F5 8401 | SS Ss046 | D1 Sd197 | B18 BS512 | F2a 2457T | F2a 301 |
|--------------|--------------|--------------|--------------|----------------------------|--------------------------------------|----------------------------|----------------------------|-------------------|-----|-----|---------|-------|----------|----------|------|----|--------|-------|---------|------|-------|------|-------|--------|----------|---------|----------|----------|-----------|-----------|---------|
| c            | 3324459      | t            | 3461485      | ns                         | t                                    | clone D                    | ++                         | t                 |     |     |         |       |          |          |      |    | c      | c     |         | t    |       |      | t     | t      | t        | t       |          | t        | t         | t         |         |
| c            | 3324460      | t            | 3461486      | ns                         | t                                    | clone D                    | ++                         | t                 |     |     |         |       |          |          |      |    | c      | c     |         | t    |       |      | t     | t      | t        | t       |          | t        | t         | t         |         |
| g            | 3324467      | a            | 3461493      | s                          | a                                    | clone D                    | ++                         | a                 |     |     |         |       |          |          |      |    | g      | g     |         | a    |       |      | a     | a      | a        | a       |          | a        | a         | a         |         |
| t            | 3324479      | c            | 3461505      | s                          | c                                    | clone D                    | ++                         | c                 |     |     |         |       |          |          |      |    | t      | t     |         | c    |       |      | c     | c      | c        | c       |          | c        | c         | c         |         |
| g            | 3324485      | a            | 3461511      | s                          | a                                    | clone D                    | ++                         | a                 |     |     |         |       |          |          |      |    | g      | g     |         | a    |       |      | a     | a      | a        | a       |          | a        | a         | a         |         |
| c            | 3324490      | a            | 3461516      | ns                         | a                                    | clone D                    | ++                         | a                 |     |     |         |       |          |          |      |    | c      | c     |         | a    |       |      | a     | a      | a        | a       |          | a        | a         | a         |         |
| g            | 3324492      | t            | 3461518      | ns                         | t                                    | clone D                    | ++                         | t                 |     |     |         |       |          |          |      |    | g      | g     |         | t    |       |      | t     | t      | t        | t       |          | t        | t         | t         |         |
| t            | 3324493      | c            | 3461519      | ns                         | c                                    | clone D                    | ++                         | c                 |     |     |         |       |          |          |      |    | t      | t     |         | c    |       |      | c     | c      | c        | c       |          | c        | c         | c         |         |
| a            | 3324500      | g            | 3461526      | s                          | g                                    | clone D                    | ++                         | g                 |     |     |         |       |          |          |      |    | a      | a     |         | g    |       |      | g     | g      | g        | g       |          | g        | g         | g         |         |
| g            | 3324503      | a            | 3461529      | s                          | a                                    | clone D                    | ++                         | a                 |     |     |         |       |          |          |      |    | g      | g     |         | a    |       |      | a     | a      | a        | a       |          | a        | a         | a         |         |
| c            | 3324509      | t            | 3461535      | s                          | t                                    | clone D                    | ++                         | t                 |     |     |         |       |          |          |      |    | c      | c     |         | t    |       |      | t     | t      | t        | t       |          | t        | t         | t         |         |
| g            | 3324515      | t            | 3461541      | ns                         | t                                    | clone D                    | ++                         | t                 |     |     |         |       |          |          |      |    | g      | g     |         | t    |       |      | t     | t      | t        | t       |          | t        | t         | t         |         |
| g            | 3324516      | t            | 3461542      | ns                         | t                                    | clone D                    | ++                         | t                 |     |     |         |       |          |          |      |    | g      | g     |         | t    |       |      | t     | t      | t        | t       |          | t        | t         | t         |         |
| t            | 3324517      | g            | 3461543      | ns                         | g                                    | clone D                    | ++                         | g                 |     |     |         |       |          |          |      |    | t      | t     |         | g    |       |      | g     | g      | g        | g       |          | g        | g         | g         |         |
| a            | 3324536      | g            | 3461562      | s                          | g                                    | clone D                    | ++                         | g                 |     |     |         |       |          |          |      |    | a      | a     |         | g    |       |      | g     | g      | g        | g       |          | g        | g         | g         |         |
| g            | 3324548      | a            | 3461574      | s                          | a                                    | clone D                    | ++                         | a                 |     |     |         |       |          |          |      |    | g      | g     |         | a    |       |      | a     | a      | a        | a       |          | a        | a         | a         |         |
| t            | 3324560      | a            | 3461586      | s                          | a                                    | clone D                    | ++                         | a                 |     |     |         |       |          |          |      |    | t      | t     |         | a    |       |      | a     | a      | a        | a       |          | a        | a         | a         |         |
| a            | 3324581      | c            | 3461607      | s                          | c                                    | clone D                    | ++                         | c                 |     |     |         |       |          |          |      |    | a      | a     |         | c    |       |      | c     | c      | c        | c       |          | c        | c         | c         |         |
| a            | 3324584      | g            | 3461610      | s                          | g                                    | clone D                    | ++                         | g                 |     |     |         |       |          |          |      |    | a      | a     |         | g    |       |      | g     | g      | g        | g       |          | g        | g         | g         |         |
| t            | 3324626      | c            | 3461652      | ns                         | c                                    | clone D                    | ++                         | c                 |     |     |         |       |          |          |      |    | t      | t     |         | c    |       |      | c     | c      | c        | c       |          | c        | c         | c         |         |
| t            | 3324627      | c            | 3461653      | ns                         | c                                    | clone D                    | ++                         | c                 |     |     |         |       |          |          |      |    | t      | t     |         | c    |       |      | c     | c      | c        | c       |          | c        | c         | c         |         |
| a            | 3324636      | t            | 3461662      | ns                         | t                                    | clone D                    | ++                         | t                 |     |     |         |       |          |          |      |    | a      | a     |         | t    |       |      | t     | t      | t        | t       |          | t        | t         | t         |         |
| c            | 3324637      | t            | 3461663      | ns                         | t                                    | clone D                    | ++                         | t                 |     |     |         |       |          |          |      |    | c      | c     |         | t    |       |      | t     | t      | t        | t       |          | t        | t         | t         |         |
| g            | 3324641      | a            | 3461667      | s                          | a                                    | clone D                    | ++                         | a                 |     |     |         |       |          |          |      |    | g      | g     |         | a    |       |      | a     | a      | a        | a       |          | a        | a         | a         |         |
| g            | 3324663      | c            | 3461689      | ns                         | c                                    | clone D                    | ++                         | c                 |     |     |         |       |          |          |      |    | g      | g     |         | c    |       |      | c     | c      | c        | c       |          | c        | c         | c         |         |
| c            | 3324664      | t            | 3461690      | ns                         | t                                    | clone D                    | ++                         | t                 |     |     |         |       |          |          |      |    | c      | c     |         | t    |       |      | t     | t      | t        | t       |          | t        | t         | t         |         |
| c            | 3324665      | t            | 3461691      | ns                         | t                                    | clone D                    | ++                         | t                 |     |     |         |       |          |          |      |    | c      | c     |         | t    |       |      | t     | t      | t        | t       |          | t        | t         | t         |         |
| a            | 3324666      | t            | 3461692      | ns                         | t                                    | clone D                    | ++                         | t                 |     |     |         |       |          |          |      |    | a      | a     |         | t    |       |      | t     | t      | t        | t       |          | t        | t         | t         |         |

| Clone D base | Clone D site | CFT 073 base | CFT 073 site | mutation type <sup>a</sup> | Inferred ancestral base <sup>b</sup> | lineage inferred to mutate | Support level <sup>c</sup> | ED1a <sup>d</sup> | 536 | S88 | APEC O1 | UT189 | E2348/69 | ATCC8739 | K-12 | HS | SMS3-5 | IAI39 | E24377A | SE11 | 55989 | IAI1 | Sakai | UMN026 | B4 Sb227 | F5 8401 | SS Ss046 | D1 Sd197 | B18 BS512 | F2a 2457T | F2a 301 |
|--------------|--------------|--------------|--------------|----------------------------|--------------------------------------|----------------------------|----------------------------|-------------------|-----|-----|---------|-------|----------|----------|------|----|--------|-------|---------|------|-------|------|-------|--------|----------|---------|----------|----------|-----------|-----------|---------|
| c            | 3324679      | t            | 3461705      | ns                         | t                                    | clone D                    | ++                         | t                 |     |     |         |       |          |          |      |    | c      | c     |         | t    |       |      | t     | t      | t        | t       |          | t        | t         | t         |         |
| a            | 3324680      | g            | 3461706      | s                          | g                                    | clone D                    | ++                         | g                 |     |     |         |       |          |          |      |    | a      | a     |         | g    |       |      | g     | g      | g        | g       |          | g        | g         | g         |         |
| t            | 3324685      | g            | 3461711      | ns                         | g                                    | clone D                    | ++                         | g                 |     |     |         |       |          |          |      |    | t      | t     |         | g    |       |      | g     | g      | g        | g       |          | g        | g         | g         |         |
| a            | 3324689      | g            | 3461715      | s                          | g                                    | clone D                    | ++                         | g                 |     |     |         |       |          |          |      |    | a      | a     |         | g    |       |      | g     | g      | g        | g       |          | g        | g         | g         |         |
| g            | 3324692      | a            | 3461718      | s                          | a                                    | clone D                    | ++                         | a                 |     |     |         |       |          |          |      |    | g      | g     |         | a    |       |      | a     | a      | a        | a       |          | a        | a         | a         |         |
| g            | 3324695      | t            | 3461721      | s                          | t                                    | clone D                    | ++                         | t                 |     |     |         |       |          |          |      |    | g      | g     |         | t    |       |      | t     | t      | t        | t       |          | t        | t         | t         |         |
| g            | 3324707      | a            | 3461733      | s                          | a                                    | clone D                    | ++                         | a                 |     |     |         |       |          |          |      |    | g      | g     |         | a    |       |      | a     | a      | a        | a       |          | a        | a         | a         |         |
| g            | 3324710      | c            | 3461736      | s                          | c                                    | clone D                    | ++                         | c                 |     |     |         |       |          |          |      |    | a      | g     |         | c    |       |      | c     | c      | c        | c       |          | c        | c         | c         |         |
| a            | 3324716      | g            | 3461742      | s                          | g                                    | clone D                    | ++                         | g                 |     |     |         |       |          |          |      |    | a      | a     |         | g    |       |      | g     | g      | g        | g       |          | g        | g         | g         |         |
| a            | 3324719      | g            | 3461745      | ns                         | g                                    | clone D                    | ++                         | g                 |     |     |         |       |          |          |      |    | a      | a     |         | g    |       |      | g     | g      | g        | g       |          | g        | g         | g         |         |
| t            | 3324721      | c            | 3461747      | ns                         | c                                    | clone D                    | ++                         | c                 |     |     |         |       |          |          |      |    | t      | t     |         | c    |       |      | c     | c      | c        | c       |          | c        | c         | c         |         |
| g            | 3324722      | a            | 3461748      | s                          | a                                    | clone D                    | ++                         | a                 |     |     |         |       |          |          |      |    | g      | g     |         | a    |       |      | a     | a      | a        | a       |          | a        | a         | a         |         |
| a            | 3324725      | g            | 3461751      | s                          | g                                    | clone D                    | ++                         | g                 |     |     |         |       |          |          |      |    | a      | a     |         | g    |       |      | g     | g      | g        | g       |          | g        | g         | g         |         |
| c            | 3324743      | t            | 3461769      | s                          | t                                    | clone D                    | ++                         | t                 |     |     |         |       |          |          |      |    | c      | c     |         | t    |       |      | t     | t      | t        | t       |          | t        | t         | t         |         |
| g            | 3324776      | a            | 3461802      | s                          | a                                    | clone D                    | ++                         | a                 |     |     |         |       |          |          |      |    | g      | g     |         | a    |       |      | a     | a      | a        | a       |          | a        | a         | a         |         |
| a            | 3324794      | g            | 3461820      | s                          | g                                    | clone D                    | ++                         | g                 |     |     |         |       |          |          |      |    | a      | a     |         | g    |       |      | g     | g      | g        | g       |          | g        | g         | g         |         |
| t            | 3324803      | c            | 3461829      | s                          | c                                    | clone D                    | ++                         | c                 |     |     |         |       |          |          |      |    | t      | t     |         | c    |       |      | c     | c      | c        | c       |          | c        | c         | c         |         |
| a            | 3324806      | g            | 3461832      | s                          | g                                    | clone D                    | ++                         | g                 |     |     |         |       |          |          |      |    | a      | a     |         | g    |       |      | g     | g      | g        | g       |          | g        | g         | g         |         |
| a            | 3324827      | t            | 3461853      | s                          | t                                    | clone D                    | ++                         | t                 |     |     |         |       |          |          |      |    | a      | a     |         | t    |       |      | t     | t      | t        | t       |          | t        | t         | t         |         |
| g            | 3324851      | a            | 3461877      | s                          | a                                    | clone D                    | ++                         | a                 |     |     |         |       |          |          |      |    | g      | g     |         | a    |       |      | a     | a      | a        | a       |          | a        | a         | a         |         |
| a            | 3324857      | c            | 3461883      | s                          | c                                    | clone D                    | ++                         | c                 |     |     |         |       |          |          |      |    | a      | a     |         | c    |       |      | c     | c      | c        | c       |          | c        | c         | c         |         |
| g            | 3324863      | a            | 3461889      | s                          | a                                    | clone D                    | ++                         | a                 |     |     |         |       |          |          |      |    | g      | g     |         | a    |       |      | a     | a      | a        | a       |          | a        | a         | a         |         |
| g            | 3324871      | a            | 3461897      | s                          | a                                    | clone D                    | ++                         | a                 |     |     |         |       |          |          |      |    | g      | g     |         | a    |       |      | a     | a      | a        | a       |          | a        | a         | a         |         |
| c            | 3324872      | t            | 3461898      | ns                         | t                                    | clone D                    | ++                         | t                 |     |     |         |       |          |          |      |    | c      | c     |         | t    |       |      | t     | t      | t        | t       |          | t        | t         | t         |         |
| t            | 3324873      | g            | 3461899      | ns                         | g                                    | clone D                    | ++                         | g                 |     |     |         |       |          |          |      |    | t      | t     |         | g    |       |      | g     | g      | g        | g       |          | g        | g         | g         |         |
| g            | 3324878      | c            | 3461904      | s                          | c                                    | clone D                    | ++                         | c                 |     |     |         |       |          |          |      |    | g      | g     |         | c    |       |      | c     | c      | c        | c       |          | c        | c         | c         |         |
| g            | 3324887      | a            | 3461913      | s                          | a                                    | clone D                    | ++                         | a                 |     |     |         |       |          |          |      |    | g      | g     |         | a    |       |      | a     | a      | a        | a       |          | a        | a         | a         |         |
| g            | 3324890      | a            | 3461916      | s                          | a                                    | clone D                    | ++                         | a                 |     |     |         |       |          |          |      |    | g      | g     |         | a    |       |      | a     | a      | a        | a       |          | a        | a         | a         |         |









| Clone D base | Clone D site | CFT 073 base | CFT 073 site | mutation type <sup>a</sup> | Inferred ancestral base <sup>b</sup> | lineage inferred to mutate | Support level <sup>c</sup> | ED1a <sup>d</sup> | 536 | S88 | APEC O1 | UT189 | E2348/69 | ATCC8739 | K-12 | HS | SMS3-5 | IAI39 | E24377A | SE11 | 55989 | IAI1 | Sakai | UMN026 | B4 Sb227 | F5 8401 | SS Ss046 | D1 Sd197 | B18 BS512 | F2a 2457T | F2a 301 |
|--------------|--------------|--------------|--------------|----------------------------|--------------------------------------|----------------------------|----------------------------|-------------------|-----|-----|---------|-------|----------|----------|------|----|--------|-------|---------|------|-------|------|-------|--------|----------|---------|----------|----------|-----------|-----------|---------|
| a            | 3325967      | g            | 3462993      | s                          | g                                    | clone D                    | ++                         | g                 |     |     |         |       |          |          |      |    | a      | a     |         | g    |       |      | g     | g      | g        | g       |          | g        | g         | g         |         |
| t            | 3326006      | g            | 3463032      | ns                         | g                                    | clone D                    | ++                         | g                 |     |     |         |       |          |          |      |    | t      | t     |         | g    |       |      | g     | g      | g        | g       |          | g        | g         | g         |         |
| t            | 3326008      | c            | 3463034      | ns                         | c                                    | clone D                    | ++                         | c                 |     |     |         |       |          |          |      |    | t      | t     |         | c    |       |      | c     | c      | c        | c       |          | c        | c         | c         |         |
| t            | 3326032      | a            | 3463058      | ns                         | a                                    | clone D                    | ++                         | a                 |     |     |         |       |          |          |      |    | t      | t     |         | a    |       |      | a     | a      | a        | a       |          | a        | a         | a         |         |
| a            | 3326048      | g            | 3463074      | s                          | g                                    | clone D                    | ++                         | g                 |     |     |         |       |          |          |      |    | a      | a     |         | g    |       |      | g     | g      | g        | g       |          | g        | g         | g         |         |
| g            | 3326054      | a            | 3463080      | s                          | a                                    | clone D                    | ++                         | a                 |     |     |         |       |          |          |      |    | g      | g     |         | a    |       |      | a     | a      | a        | a       |          | a        | a         | a         |         |
| c            | 3326062      | t            | 3463088      | ns                         | t                                    | clone D                    | ++                         | t                 |     |     |         |       |          |          |      |    | c      | c     |         | t    |       |      | t     | t      | t        | t       |          | t        | t         | t         |         |
| c            | 3326066      | g            | 3463092      | s                          | g                                    | clone D                    | ++                         | g                 |     |     |         |       |          |          |      |    | c      | c     |         | g    |       |      | g     | g      | g        | g       |          | g        | g         | g         |         |
| g            | 3326069      | a            | 3463095      | s                          | a                                    | clone D                    | ++                         | a                 |     |     |         |       |          |          |      |    | g      | g     |         | a    |       |      | a     | a      | a        | a       |          | a        | a         | a         |         |
| c            | 3326089      | t            | 3463115      | ns                         | t                                    | clone D                    | ++                         | t                 |     |     |         |       |          |          |      |    | c      | c     |         | t    |       |      | t     | t      | t        | t       |          | t        | t         | t         |         |
| a            | 3326090      | g            | 3463116      | s                          | g                                    | clone D                    | ++                         | g                 |     |     |         |       |          |          |      |    | a      | a     |         | g    |       |      | g     | g      | g        | g       |          | g        | g         | g         |         |
| g            | 3326108      | t            | 3463134      | s                          | t                                    | clone D                    | ++                         | t                 |     |     |         |       |          |          |      |    | g      | g     |         | t    |       |      | t     | t      | t        | t       |          | t        | t         | t         |         |
| c            | 3326115      | t            | 3463141      | ns                         | t                                    | clone D                    | ++                         | t                 |     |     |         |       |          |          |      |    | c      | c     |         | t    |       |      | t     | t      | t        | t       |          | t        | t         | t         |         |
| g            | 3326126      | a            | 3463152      | s                          | a                                    | clone D                    | ++                         | a                 |     |     |         |       |          |          |      |    | g      | g     |         | a    |       |      | a     | a      | a        | a       |          | a        | a         | a         |         |
| a            | 3326135      | g            | 3463161      | s                          | g                                    | clone D                    | ++                         | g                 |     |     |         |       |          |          |      |    | a      | a     |         | g    |       |      | g     | g      | g        | g       |          | g        | g         | g         |         |
| c            | 3326141      | t            | 3463167      | s                          | t                                    | clone D                    | ++                         | t                 |     |     |         |       |          |          |      |    | c      | c     |         | t    |       |      | t     | t      | t        | t       |          | t        | t         | t         |         |
| g            | 3326143      | a            | 3463169      | s                          | a                                    | clone D                    | ++                         | a                 |     |     |         |       |          |          |      |    | g      | g     |         | a    |       |      | a     | a      | a        | a       |          | a        | a         | a         |         |
| a            | 3326162      | c            | 3463188      | s                          | c                                    | clone D                    | ++                         | c                 |     |     |         |       |          |          |      |    | a      | a     |         | c    |       |      | c     | c      | c        | c       |          | c        | c         | c         |         |
| g            | 3326171      | a            | 3463197      | s                          | a                                    | clone D                    | ++                         | a                 |     |     |         |       |          |          |      |    | g      | g     |         | a    |       |      | a     | a      | a        | a       |          | a        | a         | a         |         |
| t            | 3326189      | c            | 3463215      | s                          | c                                    | clone D                    | ++                         | c                 |     |     |         |       |          |          |      |    | t      | t     |         | c    |       |      | c     | c      | c        | c       |          | c        | c         | c         |         |
| g            | 3326201      | a            | 3463227      | s                          | a                                    | clone D                    | ++                         | a                 |     |     |         |       |          |          |      |    | g      | g     |         | a    |       |      | a     | a      | a        | a       |          | a        | a         | a         |         |
| g            | 3326240      | a            | 3463266      | s                          | a                                    | clone D                    | ++                         | a                 |     |     |         |       |          |          |      |    | g      | g     |         | a    |       |      | a     | a      | a        | a       |          | a        | a         | a         |         |
| g            | 3326243      | t            | 3463269      | s                          | t                                    | clone D                    | ++                         | t                 |     |     |         |       |          |          |      |    | g      | g     |         | t    |       |      | t     | t      | t        | t       |          | t        | t         | t         |         |
| t            | 3326256      | c            | 3463282      | ns                         | c                                    | clone D                    | ++                         | c                 |     |     |         |       |          |          |      |    | t      | t     |         | c    |       |      | c     | c      | c        | c       |          | c        | c         | c         |         |
| c            | 3326267      | t            | 3463293      | ns                         | t                                    | clone D                    | ++                         | t                 |     |     |         |       |          |          |      |    | c      | c     |         | t    |       |      | t     | t      | t        | t       |          | t        | t         | t         |         |
| c            | 3326269      | t            | 3463295      | ns                         | t                                    | clone D                    | ++                         | t                 |     |     |         |       |          |          |      |    | c      | c     |         | t    |       |      | t     | t      | t        | t       |          | t        | t         | t         |         |
| a            | 3326272      | t            | 3463298      | ns                         | t                                    | clone D                    | ++                         | t                 |     |     |         |       |          |          |      |    | a      | a     |         | t    |       |      | t     | t      | t        | t       |          | t        | t         | t         |         |
| g            | 3326274      | t            | 3463300      | ns                         | t                                    | clone D                    | ++                         | t                 |     |     |         |       |          |          |      |    | g      | g     |         | t    |       |      | t     | t      | t        | t       |          | t        | t         | t         |         |



| Clone D base | Clone D site | CFT 073 base | CFT 073 site | mutation type <sup>a</sup> | Inferred ancestral base <sup>b</sup> | lineage inferred to mutate | Support level <sup>c</sup> | ED1a <sup>d</sup> | 536 | S88 | APEC O1 | UT189 | E2348/69 | ATCC8739 | K-12 | HS | SMS3-5 | IAI39 | E24377A | SE11 | 55989 | IAI1 | Sakai | UMN026 | B4 Sb227 | F5 8401 | SS Ss046 | D1 Sd197 | B18 BS512 | F2a 2457T | F2a 301 |
|--------------|--------------|--------------|--------------|----------------------------|--------------------------------------|----------------------------|----------------------------|-------------------|-----|-----|---------|-------|----------|----------|------|----|--------|-------|---------|------|-------|------|-------|--------|----------|---------|----------|----------|-----------|-----------|---------|
| g            | 3326382      | t            | 3463408      | s                          | t                                    | clone D                    | ++                         | t                 |     |     |         |       |          |          |      |    |        |       |         |      | t     |      | t     | t      | t        | t       |          | t        | t         | t         |         |
| c            | 3326408      | t            | 3463411      | nc                         | c                                    | CFT073                     | ++                         | c                 |     |     |         |       |          |          |      |    | c      | c     |         |      | c     |      | t     | c      | c        | c       |          | c        | c         | c         |         |
| g            | 3326412      | a            | 3463415      | nc                         | a                                    | clone D                    | ++                         | a                 |     |     |         |       |          |          |      |    | g      | g     |         |      | a     |      | a     | a      | a        | a       |          | a        | a         | a         |         |
| c            | 3326416      | t            | 3463419      | nc                         | t                                    | clone D                    | ++                         | t                 |     |     |         |       |          |          |      |    | c      | c     |         |      | t     |      | t     | t      | t        | t       |          | t        | t         | t         |         |
| a            | 3326426      | c            | 3463429      | nc                         | a                                    | CFT073                     | ++                         | a                 |     |     |         |       |          |          |      |    | a      | a     |         |      | a     |      | c     | a      | a        | a       |          | a        | a         | a         |         |
| t            | 3326444      | g            | 3463447      | nc                         | g                                    | clone D                    | ++                         | g                 |     |     |         |       |          |          |      |    | -      | -     |         |      | g     |      | g     | g      | g        | g       |          | g        | g         | g         |         |
| c            | 3326448      | t            | 3463452      | nc                         | t                                    | clone D                    | ++                         | t                 |     |     |         |       |          |          |      |    | c      | c     |         |      | t     |      | t     | t      | t        | t       |          | t        | t         | t         |         |
| c            | 3326449      | t            | 3463453      | nc                         | t                                    | clone D                    | ++                         | t                 |     |     |         |       |          |          |      |    | c      | c     |         |      | t     |      | t     | t      | t        | t       |          | t        | t         | t         |         |
| t            | 3326451      | c            | 3463455      | ns                         | c                                    | clone D                    | ++                         | c                 |     |     |         |       |          |          |      |    | t      | t     |         |      | c     |      | c     | c      | c        | c       |          | c        | c         | c         |         |
| a            | 3326452      | g            | 3463456      | ns                         | g                                    | clone D                    | ++                         | g                 |     |     |         |       |          |          |      |    | a      | a     |         |      | g     |      | g     | g      | g        | g       |          | g        | g         | g         |         |
| g            | 3326454      | c            | 3463458      | ns                         | c                                    | clone D                    | ++                         | c                 |     |     |         |       |          |          |      |    | g      | g     |         |      | c     |      | c     | c      | c        | c       |          | c        | c         | c         |         |
| g            | 3326477      | t            | 3463481      | s                          | t                                    | clone D                    | ++                         | t                 |     |     |         |       |          |          |      |    | g      | g     |         |      | t     |      | t     | t      | t        | t       |          | t        | t         | t         |         |
| t            | 3326510      | c            | 3463514      | s                          | c                                    | clone D                    | ++                         | c                 |     |     |         |       |          |          |      |    | t      | t     |         |      | c     |      | c     | c      | c        | c       |          | c        | c         | c         |         |
| t            | 3326515      | g            | 3463519      | ns                         | g                                    | clone D                    | ++                         | g                 |     |     |         |       |          |          |      |    | t      | t     |         |      | g     |      | g     | g      | g        | g       |          | g        | g         | g         |         |
| t            | 3326546      | g            | 3463550      | s                          | g                                    | clone D                    | ++                         | g                 |     |     |         |       |          |          |      |    | t      | t     |         |      | g     |      | g     | g      | g        | g       |          | g        | g         | g         |         |
| g            | 3326582      | a            | 3463586      | s                          | a                                    | clone D                    | ++                         | a                 |     |     |         |       |          |          |      |    | g      | g     |         |      | a     |      | a     | a      | a        | a       |          | a        | a         | a         |         |
| a            | 3326591      | g            | 3463595      | s                          | g                                    | clone D                    | ++                         | g                 |     |     |         |       |          |          |      |    | a      | a     |         |      | g     |      | g     | g      | g        | g       |          | g        | g         | g         |         |
| a            | 3326604      | g            | 3463608      | ns                         | g                                    | clone D                    | ++                         | g                 |     |     |         |       |          |          |      |    | a      | a     |         |      | g     |      | g     | g      | g        | g       |          | g        | g         | g         |         |
| g            | 3326606      | a            | 3463610      | s                          | a                                    | clone D                    | ++                         | a                 |     |     |         |       |          |          |      |    | g      | g     |         |      | a     |      | a     | a      | a        | a       |          | a        | a         | a         |         |
| g            | 3326615      | a            | 3463619      | s                          | a                                    | clone D                    | ++                         | a                 |     |     |         |       |          |          |      |    | g      | g     |         |      | a     |      | a     | a      | a        | a       |          | a        | a         | a         |         |
| c            | 3326618      | t            | 3463622      | s                          | t                                    | clone D                    | ++                         | t                 |     |     |         |       |          |          |      |    | c      | c     |         |      | t     |      | t     | t      | t        | t       |          | t        | t         | t         |         |
| g            | 3326692      | a            | 3463696      | s                          | a                                    | clone D                    | ++                         | a                 |     |     |         |       |          |          |      |    | g      | g     |         |      | a     |      | a     | a      | a        | a       |          | a        | a         | a         |         |
| c            | 3326723      | t            | 3463727      | s                          | t                                    | clone D                    | ++                         | t                 |     |     |         |       |          |          |      |    | c      | c     |         |      | t     |      | t     | t      | t        | t       |          | t        | t         | t         |         |
| c            | 3326774      | t            | 3463778      | s                          | t                                    | clone D                    | ++                         | t                 |     |     |         |       |          |          |      |    | c      | c     |         |      | t     |      | t     | t      | t        | t       |          | t        | t         | t         |         |
| t            | 3326781      | c            | 3463785      | ns                         | t                                    | CFT073                     | ++                         | t                 |     |     |         |       |          |          |      |    | t      | t     |         |      | t     |      | c     | t      | t        | t       |          | t        | t         | t         |         |
| c            | 3326795      | t            | 3463799      | s                          | t                                    | clone D                    | ++                         | t                 |     |     |         |       |          |          |      |    | c      | c     |         |      | t     |      | t     | t      | t        | t       |          | t        | t         | t         |         |
| g            | 3326803      | a            | 3463807      | s                          | a                                    | clone D                    | ++                         | a                 |     |     |         |       |          |          |      |    | g      | g     |         |      | a     |      | a     | a      | a        | a       |          | a        | a         | a         |         |
| c            | 3326804      | t            | 3463808      | s                          | t                                    | clone D                    | ++                         | t                 |     |     |         |       |          |          |      |    | c      | c     |         |      | t     |      | t     | t      | t        | t       |          | t        | t         | t         |         |





| Clone D base | Clone D site | CFT 073 base | CFT 073 site | mutation type <sup>a</sup> | Inferred ancestral base <sup>b</sup> | lineage inferred to mutate | Support level <sup>c</sup> | ED1a <sup>d</sup> | 536 | S88 | APEC O1 | UT189 | E2348/69 | ATCC8739 | K-12 | HS | SMS3-5 | IAI39 | E24377A | SE11 | 55989 | IAI1 | Sakai | UMN026 | B4 Sb227 | F5 8401 | SS Ss046 | D1 Sd197 | B18 BS512 | F2a 2457T | F2a 301 |
|--------------|--------------|--------------|--------------|----------------------------|--------------------------------------|----------------------------|----------------------------|-------------------|-----|-----|---------|-------|----------|----------|------|----|--------|-------|---------|------|-------|------|-------|--------|----------|---------|----------|----------|-----------|-----------|---------|
| g            | 3329793      | a            | 3466797      | s                          | g                                    | CFT073                     | ++                         | g                 |     |     |         |       |          |          |      |    | g      | g     |         | a    |       |      | a     | g      | g        | g       |          | g        | g         | g         |         |
| a            | 3330006      | g            | 3467010      | s                          | a                                    | CFT073                     | ++                         | a                 |     |     |         |       |          |          |      |    | a      | a     |         | a    |       |      | a     | a      | a        | a       |          | a        | a         | a         |         |
| t            | 3330033      | c            | 3467037      | s                          | t                                    | CFT073                     | ++                         | t                 |     |     |         |       |          |          |      |    | c      | t     |         | c    |       |      | c     | t      | t        | t       |          | t        | t         | t         |         |
| a            | 3330144      | g            | 3467148      | s                          | a                                    | CFT073                     | ++                         | a                 |     |     |         |       |          |          |      |    | g      | a     |         | g    |       |      | g     | a      | a        | a       |          | a        | a         | a         |         |
| g            | 3330206      | a            | 3467210      | ns                         | g                                    | CFT073                     | ++                         | g                 |     |     |         |       |          |          |      |    | a      | g     |         | a    |       |      | a     | g      | g        | g       |          | g        | g         | g         |         |
| a            | 3330246      | t            | 3467250      | s                          | t                                    | clone D                    | ++                         | t                 |     |     |         |       |          |          |      |    | t      | t     |         | t    |       |      | t     | t      | t        | t       |          | t        | t         | t         |         |
| a            | 3331062      | g            | 3468066      | s                          | a                                    | CFT073                     | ++                         | a                 |     |     |         |       |          |          |      |    | g      | a     |         | g    |       |      | g     | a      | a        | a       |          | a        | a         | a         |         |
| c            | 3331144      | a            | 3468148      | ns                         | a                                    | clone D                    | ++                         | a                 |     |     |         |       |          |          |      |    | c      | c     |         | a    |       |      | a     | a      | a        | a       |          | a        | a         | a         |         |
| c            | 3331725      | t            | 3468729      | s                          | c                                    | CFT073                     | ++                         | c                 |     |     |         |       |          |          |      |    | c      | c     |         | t    |       |      | t     | c      | c        | c       |          | c        | c         | c         |         |
| a            | 3331755      | g            | 3468759      | s                          | a                                    | CFT073                     | ++                         | a                 |     |     |         |       |          |          |      |    | g      | a     |         | g    |       |      | g     | a      | a        | a       |          | a        | a         | a         |         |
| c            | 3331760      | t            | 3468764      | ns                         | c                                    | CFT073                     | ++                         | c                 |     |     |         |       |          |          |      |    | c      | c     |         | t    |       |      | t     | c      | c        | c       |          | c        | c         | c         |         |
| a            | 3331798      | g            | 3468802      | ns                         | a                                    | CFT073                     | ++                         | a                 |     |     |         |       |          |          |      |    | g      | a     |         | g    |       |      | g     | a      | a        | a       |          | a        | a         | a         |         |
| a            | 3331800      | g            | 3468804      | s                          | a                                    | CFT073                     | ++                         | a                 |     |     |         |       |          |          |      |    | g      | a     |         | g    |       |      | g     | a      | a        | a       |          | a        | a         | a         |         |
| g            | 3331863      | c            | 3468867      | s                          | g                                    | CFT073                     | ++                         | g                 |     |     |         |       |          |          |      |    | c      | g     |         | c    |       |      | c     | g      | g        | g       |          | g        | g         | g         |         |
| g            | 3332024      | t            | 3469028      | ns                         | g                                    | CFT073                     | ++                         | g                 |     |     |         |       |          |          |      |    | t      | g     |         | t    |       |      | t     | g      | g        | g       |          | g        | g         | g         |         |
| c            | 3332160      | t            | 3469164      | nc                         | t                                    | clone D                    | ++                         | t                 |     |     |         |       |          |          |      |    | t      | c     |         | t    |       |      | t     | t      | t        | t       |          | t        | t         | t         |         |
| t            | 3332205      | g            | 3469209      | nc                         | t                                    | CFT073                     | ++                         | t                 |     |     |         |       |          |          |      |    | g      | t     |         | g    |       |      | g     | t      | t        | t       |          | t        | t         | t         |         |
| t            | 3332272      | a            | 3469276      | nc                         | t                                    | CFT073                     | ++                         | t                 |     |     |         |       |          |          |      |    | c      | t     |         | a    |       |      | a     | t      | t        | t       |          | t        | t         | t         |         |
| a            | 3332282      | t            | 3469286      | s                          | a                                    | CFT073                     | ++                         | a                 |     |     |         |       |          |          |      |    | t      | a     |         | t    |       |      | t     | a      | a        | a       |          | a        | a         | a         |         |
| a            | 3332357      | g            | 3469361      | s                          | a                                    | CFT073                     | ++                         | a                 |     |     |         |       |          |          |      |    | a      | a     |         | g    |       |      | g     | a      | a        | a       |          | a        | a         | a         |         |
| c            | 3332474      | g            | 3469478      | ns                         | g                                    | clone D                    | ++                         | g                 |     |     |         |       |          |          |      |    | g      | g     |         | g    |       |      | g     | g      | g        | g       |          | g        | g         | g         |         |
| t            | 3332699      | a            | 3469703      | s                          | t                                    | CFT073                     | ++                         | t                 |     |     |         |       |          |          |      |    | g      | t     |         | t    |       |      | t     | t      | t        | t       |          | t        | t         | t         |         |
| g            | 3332899      | a            | 3469903      | ns                         | g                                    | CFT073                     | ++                         | g                 |     |     |         |       |          |          |      |    | g      | g     |         | g    |       |      | g     | g      | g        | g       |          | g        | g         | g         |         |
| a            | 3333533      | g            | 3470537      | nc                         | g                                    | clone D                    | ++                         | g                 |     |     |         |       |          |          |      |    |        | g     |         | g    |       |      | g     | g      | g        | g       |          | g        | g         | g         |         |
| c            | 3334960      | t            | 3470630      | s                          | c                                    | CFT073                     | ++                         | c                 |     |     |         |       |          |          |      |    |        |       |         |      |       |      | t     |        |          |         |          |          |           |           |         |
| a            | 3336081      | t            | 3471750      | s                          | a                                    | CFT073                     | ++                         | a                 |     |     |         |       |          |          |      |    |        |       |         |      |       |      |       | a      |          |         |          |          |           |           |         |
| g            | 3336087      | c            | 3471756      | ns                         | g                                    | CFT073                     | ++                         | g                 |     |     |         |       |          |          |      |    |        |       |         |      |       |      |       | g      |          |         |          |          |           |           |         |
| a            | 3336088      | g            | 3471757      | ns                         | a                                    | CFT073                     | ++                         | a                 |     |     |         |       |          |          |      |    |        |       |         |      |       |      |       | a      |          |         |          |          |           |           |         |





| Clone D base | Clone D site | CFT 073 base | CFT 073 site | mutation type <sup>a</sup> | Inferred ancestral base <sup>b</sup> | lineage inferred to mutate | Support level <sup>c</sup> | ED1a <sup>d</sup> | 536 | S88 | APEC O1 | UT189 | E2348/69 | ATCC8739 | K-12 | HS | SMS3-5 | IAI39 | E24377A | SE11 | 55989 | IAI1 | Sakai | UMN026 | B4 Sb227 | F5 8401 | SS Ss046 | D1 Sd197 | B18 BS512 | F2a 2457T | F2a 301 |
|--------------|--------------|--------------|--------------|----------------------------|--------------------------------------|----------------------------|----------------------------|-------------------|-----|-----|---------|-------|----------|----------|------|----|--------|-------|---------|------|-------|------|-------|--------|----------|---------|----------|----------|-----------|-----------|---------|
| a            | 3344401      | c            | 3480070      | nc                         | a                                    | CFT073                     | ++                         | a                 |     |     |         |       |          |          |      |    |        |       |         |      |       |      |       | a      |          |         |          |          |           |           |         |
| a            | 3346076      | g            | 3481745      | s                          | g                                    | clone D                    | ++                         | g                 | g   |     |         | g     | g        |          |      | g  | g      |       |         |      | g     |      | g     | g      | g        |         |          |          |           | g         |         |
| a            | 3346180      | g            | 3481849      | ns                         | a                                    | CFT073                     | ++                         | a                 | a   |     |         | g     | g        |          |      | g  | g      |       |         |      | g     |      | g     | g      | a        |         |          |          |           | a         |         |
| t            | 3347981      | c            | 3483650      | ns                         | c                                    | clone D                    | ++                         | c                 | c   | c   |         |       | c        |          |      |    |        |       |         | c    | c     |      | c     | c      | c        |         | c        | c        | c         | c         | c       |
| c            | 3348195      | g            | 3483863      | ns                         | c                                    | CFT073                     | +                          | c                 |     |     |         |       |          |          |      | c  |        |       |         |      | c     |      |       | c      |          |         |          |          |           | c         | c       |
| a            | 3348207      | g            | 3483875      | s                          | ?                                    | ?                          | +/-                        | t                 | t   | t   | t       | t     |          |          |      | a  | t      |       |         | g    | g     |      |       | a      |          |         |          |          | g         | g         |         |
| c            | 3348420      | a            | 3484088      | s                          | a                                    | clone D                    | ++                         | a                 | a   | a   | a       | a     |          |          |      | a  | a      |       |         | a    | a     |      |       | c      |          |         |          |          | c         | c         |         |
| g            | 3348426      | c            | 3484094      | s                          | ?                                    | ?                          | +/-                        | a                 | a   | a   | a       | a     |          |          |      | a  | a      |       |         | a    | a     |      |       | g      |          |         |          |          | a         | a         |         |
| a            | 3348434      | g            | 3484102      | ns                         | a                                    | CFT073                     | ++                         | a                 | a   | a   | a       | a     |          |          |      | a  | a      |       |         | a    | a     |      |       | a      |          |         |          |          | a         | a         |         |
| t            | 3348435      | c            | 3484103      | s                          | t                                    | CFT073                     | ++                         | t                 | t   | t   | t       | t     |          |          |      | t  | t      |       |         | c    | t     |      |       | t      |          |         |          |          | t         | t         |         |
| g            | 3348482      | a            | 3484150      | ns                         | ?                                    | ?                          | +/-                        | t                 | g   | t   | t       | g     |          |          |      | g  | t      |       |         | g    | g     |      |       | g      |          |         |          |          | t         | t         |         |
| g            | 3348483      | a            | 3484151      | s                          | a                                    | clone D                    | ++                         | a                 | a   | a   | a       | a     |          |          |      | a  | a      |       |         | a    | a     |      |       | g      |          |         |          |          | a         | a         |         |
| a            | 3348492      | t            | 3484160      | s                          | t                                    | clone D                    | ++                         | t                 | t   | t   | t       | t     |          |          |      | t  | t      |       |         | t    | c     |      |       | a      |          |         |          |          | t         | t         |         |
| a            | 3348495      | g            | 3484163      | s                          | g                                    | clone D                    | ++                         | g                 | g   | g   | g       | g     |          |          |      | g  | g      |       |         | g    | t     |      |       | a      |          |         |          |          | a         | a         |         |
| t            | 3348498      | c            | 3484166      | s                          | c                                    | clone D                    | ++                         | c                 | c   | c   | c       | c     |          |          |      | c  | c      |       |         | c    | c     |      |       | c      |          |         |          |          | c         | c         |         |
| a            | 3348567      | g            | 3484235      | ns                         | ?                                    | ?                          | +/-                        | c                 | a   | c   | c       | a     |          |          |      | a  | c      |       |         | c    | c     |      |       | a      |          |         |          |          | a         | a         |         |
| a            | 3348569      | g            | 3484237      | ns                         | ?                                    | ?                          | +/-                        | t                 | a   | t   | t       | a     |          |          |      | a  | t      |       |         | t    | t     |      |       | t      |          |         |          |          | t         | t         |         |
| c            | 3348577      | t            | 3484244      | nc                         | c                                    | CFT073                     | ++                         | c                 | t   | c   | c       | t     |          |          |      | t  | c      |       |         | c    | c     |      |       | c      |          |         |          |          | c         | c         |         |
| t            | 3348578      | a            | 3484245      | nc                         | a                                    | clone D                    | ++                         | a                 | a   | a   | a       | a     |          |          |      | a  | a      |       |         | a    | a     |      |       | t      |          |         |          |          | a         | a         |         |
| g            | 3348579      | c            | 3484246      | nc                         | c                                    | clone D                    | ++                         | c                 | c   | c   | c       | c     |          |          |      | c  | c      |       |         | c    | c     |      |       | g      |          |         |          |          | c         | c         |         |
| a            | 3348593      | g            | 3484260      | nc                         | g                                    | clone D                    | ++                         | g                 | g   | g   | g       | g     |          |          |      | g  | g      |       |         | g    | g     |      |       | a      |          |         |          |          | g         | g         |         |
| a            | 3348704      | g            | 3484371      | nc                         | g                                    | clone D                    | +                          |                   | g   |     |         | g     |          |          |      | g  |        |       |         |      | a     |      |       | a      |          |         |          |          |           |           |         |
| g            | 3348706      | a            | 3484373      | nc                         | a                                    | clone D                    | +                          |                   | a   |     |         | a     |          |          |      | a  |        |       |         |      | g     |      |       | g      |          |         |          |          |           |           |         |
| g            | 3349168      | c            | 3484835      | ns                         | g                                    | CFT073                     | ++                         | g                 | g   | g   | g       | g     |          |          |      | g  | g      |       |         | g    | g     |      |       | g      |          |         |          |          |           |           |         |
| a            | 3349227      | g            | 3484894      | ns                         | g                                    | clone D                    | ++                         | g                 | g   | g   | g       | g     |          |          |      | g  | g      |       |         | g    | g     |      |       | g      |          |         |          |          |           |           |         |
| t            | 3349507      | c            | 3485174      | ns                         | c                                    | clone D                    | ++                         | c                 | c   | c   | c       | c     |          |          |      | c  | c      |       |         | c    | c     |      |       | c      |          |         |          |          |           |           |         |
| c            | 3349575      | t            | 3485242      | s                          | t                                    | clone D                    | ++                         | t                 | t   | t   | t       | t     |          |          |      | c  | t      |       |         | t    |       |      |       | c      |          |         |          |          |           |           |         |
| a            | 3349703      | g            | 3485370      | nc                         | g                                    | clone D                    | +                          |                   |     |     |         |       |          |          |      | g  |        |       |         |      | g     |      |       | g      |          |         |          |          |           |           |         |





| Clone D base | Clone D site | CFT 073 base | CFT 073 site | mutation type <sup>a</sup> | Inferred ancestral base <sup>b</sup> | lineage inferred to mutate | Support level <sup>c</sup> | ED1a <sup>d</sup> | 536 | S88 | APEC O1 | UT189 | E2348/69 | ATCC8739 | K-12 | HS | SMS3-5 | IAI39 | E24377A | SE11 | 55989 | IAI1 | Sakai | UMN026 | B4 Sb227 | F5 8401 | SS Ss046 | D1 Sd197 | B18 BS512 | F2a 2457T | F2a 301 |
|--------------|--------------|--------------|--------------|----------------------------|--------------------------------------|----------------------------|----------------------------|-------------------|-----|-----|---------|-------|----------|----------|------|----|--------|-------|---------|------|-------|------|-------|--------|----------|---------|----------|----------|-----------|-----------|---------|
| a            | 3355836      | g            | 3491512      | nc                         | g                                    | clone D                    | ++                         | g                 | g   |     |         |       |          |          | g    |    |        |       |         |      | g     |      | g     |        |          |         |          |          | g         | g         |         |
| a            | 3355840      | c            | 3491516      | nc                         | c                                    | clone D                    | ++                         | c                 | c   |     |         |       |          |          | c    |    |        |       |         |      | c     |      | c     |        |          |         |          |          | c         | c         |         |
| a            | 3355899      | t            | 3491575      | nc                         | t                                    | clone D                    | ++                         | t                 | t   |     |         |       |          |          | t    |    |        |       |         |      | t     |      | t     |        |          |         |          |          | t         | t         |         |
| c            | 3355920      | t            | 3491596      | nc                         | t                                    | clone D                    | ++                         | t                 | t   |     |         |       |          |          | t    |    |        |       |         |      | t     |      | t     |        |          |         |          |          | t         | t         |         |
| g            | 3356251      | t            | 3491927      | s                          | t                                    | clone D                    | ++                         | t                 | t   | t   |         | t     |          |          | t    | t  | t      |       |         | t    |       | t    | t     |        |          |         |          | t        | t         |           |         |
| t            | 3356276      | c            | 3491952      | ns                         | t                                    | CFT073                     | ++                         | t                 | t   | t   |         | t     |          |          | t    | t  | c      |       |         | t    |       | t    | t     |        |          |         |          | t        | t         |           |         |
| g            | 3356291      | t            | 3491967      | ns                         | t                                    | clone D                    | ++                         | t                 | g   | g   |         | g     |          |          | g    | g  | g      |       |         | g    |       | g    | g     |        |          |         |          | g        | g         |           |         |
| t            | 3356315      | g            | 3491991      | ns                         | g                                    | clone D                    | ++                         | g                 | g   | g   |         | g     |          |          | g    | g  | g      |       |         | g    |       | g    | g     |        |          |         |          | g        | g         |           |         |
| g            | 3356378      | a            | 3492054      | ns                         | a                                    | clone D                    | ++                         | a                 | g   | a   |         | a     |          |          | a    | a  | a      |       |         | a    |       | g    | a     |        |          |         |          | g        | g         |           |         |
| c            | 3357516      | t            | 3493192      | ns                         | c                                    | CFT073                     | ++                         | c                 | t   |     |         |       |          |          | t    |    |        |       |         |      | t     |      | t     |        |          |         |          | t        | t         |           |         |
| g            | 3357593      | t            | 3493269      | ns                         | ?                                    | ?                          | +/-                        | a                 | t   |     |         |       |          |          | t    |    |        |       |         |      | g     |      | t     |        |          |         |          | g        | g         |           |         |
| t            | 3357598      | c            | 3493274      | s                          | t                                    | CFT073                     | ++                         | t                 | c   |     |         |       |          |          | c    |    |        |       |         |      | t     |      | c     |        |          |         |          | c        | c         |           |         |
| a            | 3357772      | t            | 3493448      | s                          | a                                    | CFT073                     | ++                         | a                 | t   |     |         |       |          |          | t    |    |        |       |         |      | t     |      | t     |        |          |         |          | t        | t         |           |         |
| c            | 3357808      | t            | 3493484      | s                          | c                                    | CFT073                     | ++                         | c                 | t   |     |         |       |          |          | t    |    |        |       |         |      | t     |      | t     |        |          |         |          | t        | t         |           |         |
| g            | 3357811      | c            | 3493487      | s                          | g                                    | CFT073                     | ++                         | g                 | c   |     |         |       |          |          | c    |    |        |       |         |      | c     |      | c     |        |          |         |          | c        | c         |           |         |
| a            | 3357812      | g            | 3493488      | ns                         | a                                    | CFT073                     | ++                         | a                 | g   |     |         |       |          |          | g    |    |        |       |         |      | g     |      | g     |        |          |         |          | g        | g         |           |         |
| a            | 3357814      | c            | 3493490      | ns                         | a                                    | CFT073                     | ++                         | a                 | c   |     |         |       |          |          | c    |    |        |       |         |      | c     |      | c     |        |          |         |          | c        | c         |           |         |
| g            | 3357819      | a            | 3493495      | ns                         | g                                    | CFT073                     | ++                         | g                 | g   |     |         |       |          |          | g    |    |        |       |         |      | g     |      | g     |        |          |         |          | g        | g         |           |         |
| t            | 3357853      | g            | 3493529      | s                          | t                                    | CFT073                     | ++                         | t                 | g   |     |         |       |          |          | g    |    |        |       |         |      | g     |      | g     |        |          |         |          | g        | g         |           |         |
| g            | 3357905      | t            | 3493581      | ns                         | g                                    | CFT073                     | ++                         | g                 | a   |     |         |       |          |          | a    |    |        |       |         |      | a     |      | a     |        |          |         |          | a        | a         |           |         |
| c            | 3357907      | a            | 3493583      | ns                         | c                                    | CFT073                     | ++                         | c                 | c   |     |         |       |          |          | c    |    |        |       |         |      | c     |      | c     |        |          |         |          | c        | c         |           |         |
| a            | 3357918      | c            | 3493594      | ns                         | a                                    | CFT073                     | ++                         | a                 | a   |     |         |       |          |          | a    |    |        |       |         |      | a     |      | a     |        |          |         |          | a        | a         |           |         |
| g            | 3357919      | a            | 3493595      | ns                         | g                                    | CFT073                     | ++                         | g                 | g   |     |         |       |          |          | g    |    |        |       |         |      | g     |      | g     |        |          |         |          | g        | g         |           |         |
| c            | 3357922      | t            | 3493598      | s                          | c                                    | CFT073                     | ++                         | c                 | c   |     |         |       |          |          | c    |    |        |       |         |      | c     |      | c     |        |          |         |          | c        | c         |           |         |
| t            | 3357925      | g            | 3493601      | s                          | t                                    | CFT073                     | ++                         | t                 | a   |     |         |       |          |          | a    |    |        |       |         |      | a     |      | a     |        |          |         |          | a        | a         |           |         |
| a            | 3357929      | g            | 3493605      | ns                         | a                                    | CFT073                     | ++                         | a                 | g   |     |         |       |          |          | g    |    |        |       |         |      | g     |      | g     |        |          |         |          | g        | g         |           |         |
| a            | 3357931      | g            | 3493607      | ns                         | a                                    | CFT073                     | ++                         | a                 | a   |     |         |       |          |          | a    |    |        |       |         |      | a     |      | a     |        |          |         |          | a        | a         |           |         |
| c            | 3357938      | a            | 3493614      | ns                         | c                                    | CFT073                     | ++                         | c                 | a   |     |         |       |          |          | a    |    |        |       |         |      | a     |      | a     |        |          |         |          | a        | a         |           |         |

| Clone D base | Clone D site | CFT 073 base | CFT 073 site | mutation type <sup>a</sup> | Inferred ancestral base <sup>b</sup> | lineage inferred to mutate | Support level <sup>c</sup> | ED1a <sup>d</sup> | 536 | S88 | APEC O1 | UT189 | E2348/69 | ATCC8739 | K-12 | HS | SMS3-5 | IAI39 | E24377A | SE11 | 55989 | IAI1 | Sakai | UMN026 | B4 Sb227 | F5 8401 | SS Ss046 | D1 Sd197 | B18 BS512 | F2a 2457T | F2a 301 |   |
|--------------|--------------|--------------|--------------|----------------------------|--------------------------------------|----------------------------|----------------------------|-------------------|-----|-----|---------|-------|----------|----------|------|----|--------|-------|---------|------|-------|------|-------|--------|----------|---------|----------|----------|-----------|-----------|---------|---|
| g            | 3357940      | a            | 3493616      | ns                         | g                                    | CFT073                     | ++                         | g                 | a   |     |         |       |          |          | a    |    |        |       |         |      | a     |      | a     |        |          |         |          |          |           | a         | a       |   |
| g            | 3358000      | a            | 3493676      | s                          | g                                    | CFT073                     | ++                         | g                 | a   | a   |         | a     |          |          | a    |    | a      |       | a       |      | a     |      | a     |        |          |         |          |          | a         | a         | a       |   |
| t            | 3358033      | c            | 3493709      | s                          | t                                    | CFT073                     | ++                         | t                 | c   | t   |         | t     |          |          | c    |    | t      |       | t       |      | t     |      | t     |        |          |         | t        |          | t         | t         | t       |   |
| t            | 3358063      | c            | 3493739      | s                          | t                                    | CFT073                     | ++                         | t                 | c   | g   |         | g     |          |          | c    |    | g      |       | g       |      | c     |      | g     |        | c        |         |          | g        |           | c         | c       | c |
| g            | 3358086      | c            | 3493762      | ns                         | g                                    | CFT073                     | ++                         | g                 | c   | c   |         | c     |          |          | c    |    | c      |       | c       |      | c     |      | c     |        | c        |         |          | c        |           | c         | c       | c |
| t            | 3358087      | g            | 3493763      | ns                         | t                                    | CFT073                     | ++                         | t                 | g   | c   |         | c     |          |          | g    |    | c      |       | c       |      | g     |      | c     |        | g        |         |          | c        |           | g         | g       | g |
| a            | 3358088      | t            | 3493764      | ns                         | a                                    | CFT073                     | ++                         | a                 | t   | t   |         | t     |          |          | t    |    | t      |       | t       |      | t     |      | t     |        | t        |         |          | t        |           | t         | t       | t |
| c            | 3358104      | g            | 3493780      | ns                         | c                                    | CFT073                     | ++                         | c                 | g   | c   |         | c     |          |          | g    |    | c      |       | c       |      | g     |      | c     |        | g        |         |          | c        |           | g         | g       | g |
| t            | 3358126      | g            | 3493802      | s                          | t                                    | CFT073                     | ++                         | t                 | t   | g   |         | g     |          |          | g    |    | g      |       | g       |      | g     |      | g     |        | g        |         |          | g        |           | g         | g       | g |
| g            | 3358129      | a            | 3493805      | s                          | g                                    | CFT073                     | ++                         | g                 | a   | t   |         | t     |          |          | a    |    | t      |       | t       |      | a     |      | t     |        | a        |         |          | t        |           | a         | a       | a |
| t            | 3358162      | c            | 3493838      | s                          | t                                    | CFT073                     | ++                         | t                 | c   | g   |         | g     |          |          | c    |    | g      |       | g       |      | t     |      | g     |        | c        |         |          | a        |           | c         | c       | c |
| t            | 3358177      | c            | 3493853      | s                          | t                                    | CFT073                     | ++                         | t                 | c   | c   |         | c     |          |          | c    |    | c      |       | c       |      | t     |      | c     |        | t        |         |          | c        |           | t         | t       | t |
| t            | 3358179      | g            | 3493855      | ns                         | t                                    | CFT073                     | ++                         | t                 | g   | c   |         | c     |          |          | g    |    | c      |       | c       |      | t     |      | c     |        | a        |         |          | c        |           | a         | a       | a |
| t            | 3358181      | c            | 3493857      | s                          | c                                    | clone D                    | ++                         | c                 | c   | c   |         | c     |          |          | c    |    | c      |       | c       |      | c     |      | c     |        | c        |         |          | c        |           | c         | c       | c |
| a            | 3358205      | t            | 3493881      | ns                         | a                                    | CFT073                     | ++                         | a                 | t   | a   |         | a     |          |          | t    |    | a      |       | a       |      | a     |      | a     |        | t        |         |          | a        |           | t         | t       | t |
| t            | 3358264      | a            | 3493940      | s                          | t                                    | CFT073                     | ++                         | t                 | a   | t   |         | t     |          |          | a    |    | t      |       | t       |      | t     |      | t     |        | a        |         |          | t        |           | a         | a       | a |
| c            | 3358330      | a            | 3494006      | s                          | a                                    | clone D                    | ++                         | a                 | c   | c   |         | c     |          |          | c    |    | c      |       | c       |      | a     |      | c     |        | c        |         |          | c        |           | c         | c       | c |
| t            | 3358425      | c            | 3494101      | ns                         | c                                    | clone D                    | ++                         | c                 | c   | c   |         | c     |          |          | c    |    | c      |       | c       |      | c     |      | c     |        | c        |         |          | c        |           | c         | c       | c |
| t            | 3358432      | g            | 3494108      | s                          | g                                    | clone D                    | ++                         | g                 | g   | a   |         | g     |          |          | g    |    | g      |       | a       |      | g     |      | a     |        | g        |         |          | g        |           | a         | a       | a |
| t            | 3358471      | c            | 3494147      | s                          | t                                    | CFT073                     | ++                         | t                 | t   | t   |         | t     |          |          | t    |    | t      |       | t       |      | t     |      | t     |        | t        |         |          | t        |           | t         | t       | t |
| c            | 3358489      | g            | 3494165      | s                          | c                                    | CFT073                     | ++                         | c                 | g   | c   |         | c     |          |          | g    |    | g      |       | c       |      | c     |      | c     |        | g        |         |          | g        |           | c         | c       | c |
| g            | 3358498      | t            | 3494174      | ns                         | g                                    | CFT073                     | ++                         | g                 | g   | g   |         | g     |          |          | g    |    | g      |       | g       |      | g     |      | g     |        | g        |         |          | g        |           | g         | g       | g |
| a            | 3358513      | t            | 3494189      | s                          | a                                    | CFT073                     | ++                         | a                 | t   | t   |         | a     |          |          | t    |    | t      |       | t       |      | a     |      | t     |        | a        |         |          | a        |           | t         | t       | t |
| c            | 3358514      | g            | 3494190      | ns                         | c                                    | CFT073                     | ++                         | c                 | g   | g   |         | c     |          |          | g    |    | g      |       | c       |      | c     |      | c     |        | c        |         |          | c        |           | g         | g       | g |
| g            | 3358519      | c            | 3494195      | s                          | g                                    | CFT073                     | ++                         | g                 | c   | c   |         | g     |          |          | c    |    | c      |       | g       |      | g     |      | g     |        | g        |         |          | g        |           | c         | c       | c |
| a            | 3358520      | g            | 3494196      | ns                         | a                                    | CFT073                     | ++                         | a                 | g   | g   |         | a     |          |          | g    |    | g      |       | a       |      | a     |      | a     |        | a        |         |          | a        |           | g         | g       | g |
| a            | 3358525      | g            | 3494201      | s                          | a                                    | CFT073                     | ++                         | a                 | g   | g   |         | a     |          |          | g    |    | g      |       | g       |      | a     |      | g     |        | a        |         |          | a        |           | g         | g       | g |
| g            | 3358526      | a            | 3494202      | ns                         | g                                    | CFT073                     | ++                         | g                 | g   | g   |         | g     |          |          | g    |    | g      |       | g       |      | g     |      | g     |        | g        |         |          | g        |           | g         | g       | g |

| Clone D base | Clone D site | CFT 073 base | CFT 073 site | mutation type <sup>a</sup> | Inferred ancestral base <sup>b</sup> | lineage inferred to mutate | Support level <sup>c</sup> | ED1a <sup>d</sup> | 536 | S88 | APEC O1 | UT189 | E2348/69 | ATCC8739 | K-12 | HS | SMS3-5 | IAI39 | E24377A | SE11 | 55989 | IAI1 | Sakai | UMN026 | B4 Sb227 | F5 8401 | SS Ss046 | D1 Sd197 | B18 BS512 | F2a 2457T | F2a 301 |
|--------------|--------------|--------------|--------------|----------------------------|--------------------------------------|----------------------------|----------------------------|-------------------|-----|-----|---------|-------|----------|----------|------|----|--------|-------|---------|------|-------|------|-------|--------|----------|---------|----------|----------|-----------|-----------|---------|
| g            | 3358528      | a            | 3494204      | ns                         | g                                    | CFT073                     | ++                         | g                 | a   | a   | g       |       |          |          | a    | a  | a      | g     | g       | g    | g     | g    | g     |        |          |         |          | g        | a         | a         |         |
| c            | 3358624      | t            | 3494300      | s                          | c                                    | CFT073                     | ++                         | c                 | c   | c   | c       |       |          |          | c    | c  | c      | c     | c       | t    | t     | c    | t     |        |          |         |          | c        | c         | c         |         |
| c            | 3358625      | a            | 3494301      | ns                         | c                                    | CFT073                     | ++                         | c                 | c   | c   | c       |       |          |          | c    | c  | c      | c     | c       | a    | c     | a    |       |        |          |         | c        | c        | c         |           |         |
| t            | 3358630      | c            | 3494306      | s                          | t                                    | CFT073                     | ++                         | t                 | t   | t   | t       |       |          |          | t    | t  | t      | t     | t       | c    | t     | c    |       |        |          |         | t        | t        | t         |           |         |
| g            | 3358634      | a            | 3494310      | ns                         | a                                    | clone D                    | ++                         | a                 | a   | a   | g       |       |          |          | g    | g  | g      | a     | a       | a    | g     | a    |       |        |          |         | g        | a        | a         |           |         |
| t            | 3358635      | c            | 3494311      | ns                         | c                                    | clone D                    | ++                         | c                 | c   | c   | t       |       |          |          | t    | t  | t      | c     | c       | c    | t     | c    |       |        |          |         | t        | t        | t         |           |         |
| g            | 3358642      | c            | 3494318      | s                          | g                                    | CFT073                     | +                          | a                 | g   | g   | g       |       |          |          | g    | g  | g      | g     | c       | c    | a     | c    |       |        |          |         | g        | c        | c         |           |         |
| t            | 3358666      | a            | 3494342      | s                          | t                                    | CFT073                     | ++                         | t                 | t   | t   | t       |       |          |          | t    | t  | t      | t     | t       | t    | t     | a    |       |        |          |         | t        | t        | t         |           |         |
| c            | 3358690      | t            | 3494366      | s                          | c                                    | CFT073                     | ++                         | c                 | c   | c   | c       |       |          |          | c    | c  | c      | c     | c       | t    | c     | t    |       |        |          |         | c        | c        | c         |           |         |
| a            | 3358707      | g            | 3494383      | ns                         | a                                    | CFT073                     | ++                         | a                 | a   | a   | a       |       |          |          | a    | a  | a      | a     | a       | g    | a     | g    |       |        |          |         | a        | a        | a         |           |         |
| c            | 3358726      | a            | 3494402      | s                          | c                                    | CFT073                     | ++                         | c                 | c   | c   | c       |       |          |          | c    | c  | c      | c     | c       | a    | c     | a    |       |        |          |         | c        | c        | c         |           |         |
| a            | 3358743      | t            | 3494419      | ns                         | t                                    | clone D                    | ++                         | t                 | t   | t   | t       |       |          |          | t    | t  | t      | t     | t       | t    | t     | t    |       |        |          |         | t        | t        | t         |           |         |
| a            | 3358768      | c            | 3494444      | s                          | c                                    | clone D                    | ++                         | c                 | c   | c   | c       |       |          |          | c    | c  | c      | c     | c       | c    | c     | c    |       |        |          |         | c        | c        | c         |           |         |
| a            | 3358803      | g            | 3494479      | ns                         | g                                    | clone D                    | ++                         | g                 | a   | a   | a       |       |          |          | a    | a  | a      | a     | a       | g    | a     | g    |       |        |          |         | a        | a        | a         |           |         |
| a            | 3358804      | g            | 3494480      | ns                         | a                                    | CFT073                     | ++                         | a                 | a   | a   | a       |       |          |          | a    | a  | a      | a     | a       | g    | a     | g    |       |        |          |         | a        | a        | a         |           |         |
| t            | 3358813      | c            | 3494489      | s                          | c                                    | clone D                    | ++                         | c                 | c   | t   | c       |       |          |          | t    | c  | t      | t     | c       | c    | c     | c    |       |        |          |         | t        | c        | c         |           |         |
| a            | 3358825      | g            | 3494501      | s                          | g                                    | clone D                    | ++                         | g                 | a   | a   | a       |       |          |          | a    | a  | a      | a     | a       | g    | a     | g    |       |        |          |         | a        | a        | a         |           |         |
| c            | 3358831      | g            | 3494507      | s                          | c                                    | CFT073                     | ++                         | c                 | c   | c   | c       |       |          |          | c    | c  | c      | c     | c       | g    | c     | g    |       |        |          |         | c        | c        | c         |           |         |
| c            | 3358843      | t            | 3494519      | s                          | t                                    | clone D                    | ++                         | t                 | c   | c   | c       |       |          |          | t    | c  | c      | c     | t       | c    | t     | t    |       |        |          |         | c        | c        | c         |           |         |
| c            | 3358844      | a            | 3494520      | ns                         | a                                    | clone D                    | ++                         | a                 | c   | c   | c       |       |          |          | a    | c  | c      | c     | a       | c    | a     |      |       |        |          |         | c        | c        | c         |           |         |
| t            | 3358849      | c            | 3494525      | s                          | c                                    | clone D                    | ++                         | c                 | t   | t   | t       |       |          |          | c    | t  | t      | t     | c       | t    | c     |      |       |        |          |         | t        | t        | t         |           |         |
| a            | 3358959      | c            | 3494635      | ns                         | a                                    | CFT073                     | ++                         | a                 | a   | a   | a       |       |          |          | c    | a  | a      | a     | c       | a    | c     |      |       |        |          |         | a        | a        | a         |           |         |
| a            | 3358961      | c            | 3494637      | ns                         | a                                    | CFT073                     | ++                         | a                 | a   | a   | a       |       |          |          | c    | a  | a      | a     | c       | a    | c     |      |       |        |          |         | a        | a        | a         |           |         |
| c            | 3358969      | t            | 3494645      | s                          | c                                    | CFT073                     | ++                         | c                 | t   | c   | c       |       |          |          | t    | c  | c      | c     | t       | t    | c     | t    |       |        |          |         | c        | c        | c         |           |         |
| a            | 3358976      | g            | 3494652      | ns                         | g                                    | clone D                    | ++                         | g                 | g   | a   | g       |       |          |          | g    | g  | g      | g     | g       | g    | g     | g    |       |        |          |         | a        | g        | g         |           |         |
| g            | 3358985      | a            | 3494661      | ns                         | a                                    | clone D                    | ++                         | a                 | a   | c   | a       |       |          |          | a    | c  | c      | c     | a       | a    | a     |      |       |        |          |         | g        | a        | a         |           |         |
| a            | 3358991      | c            | 3494667      | ns                         | c                                    | clone D                    | ++                         | c                 | c   | a   | c       |       |          |          | a    | c  | c      | c     | c       | c    | a     | c    |       |        |          |         | a        | c        | c         |           |         |
| t            | 3359002      | g            | 3494678      | s                          | g                                    | clone D                    | ++                         | g                 | g   | g   | g       |       |          |          | g    | g  | g      | g     | g       | g    | g     | g    |       |        |          |         | t        | g        | g         |           |         |

| Clone D base | Clone D site | CFT 073 base | CFT 073 site | mutation type <sup>a</sup> | Inferred ancestral base <sup>b</sup> | lineage inferred to mutate | Support level <sup>c</sup> | ED1a <sup>d</sup> | 536 | S88 | APEC O1 | UT189 | E2348/69 | ATCC8739 | K-12 | HS | SMS3-5 | IAI39 | E24377A | SE11 | 55989 | IAI1 | Sakai | UMN026 | B4 Sb227 | F5 8401 | SS Ss046 | D1 Sd197 | B18 BS512 | F2a 2457T | F2a 301 |
|--------------|--------------|--------------|--------------|----------------------------|--------------------------------------|----------------------------|----------------------------|-------------------|-----|-----|---------|-------|----------|----------|------|----|--------|-------|---------|------|-------|------|-------|--------|----------|---------|----------|----------|-----------|-----------|---------|
| t            | 3359026      | c            | 3494702      | s                          | t                                    | CFT073                     | ++                         | t                 | c   | t   | t       | t     | t        | t        | t    | t  | t      | t     | t       | c    | t     | c    |       |        |          |         |          | t        | t         | t         |         |
| a            | 3359053      | t            | 3494729      | s                          | t                                    | clone D                    | +                          | g                 | t   | t   | a       | a     | a        | a        | a    | a  | t      | t     | t       | t    | t     | t    | t     |        |          |         |          | a        | g         | g         |         |
| c            | 3359056      | t            | 3494732      | s                          | c                                    | CFT073                     | ++                         | c                 | c   | c   | c       | c     | c        | c        | c    | c  | c      | c     | c       | c    | t     | c    | t     |        |          |         |          | c        | c         | c         |         |
| a            | 3359060      | c            | 3494736      | ns                         | a                                    | CFT073                     | ++                         | a                 | a   | a   | a       | a     | a        | a        | c    | a  | a      | a     | a       | c    | c     | a    | c     |        |          |         |          | a        | a         | a         |         |
| c            | 3359062      | t            | 3494738      | ns                         | c                                    | CFT073                     | ++                         | c                 | c   | c   | c       | c     | c        | c        | t    | c  | c      | c     | c       | t    | t     | c    | t     |        |          |         |          | c        | c         | c         |         |
| a            | 3359063      | g            | 3494739      | ns                         | a                                    | CFT073                     | ++                         | a                 | a   | a   | a       | a     | a        | a        | g    | a  | a      | a     | a       | g    | g     | a    | g     |        |          |         |          | a        | a         | a         |         |
| t            | 3359068      | g            | 3494744      | s                          | t                                    | CFT073                     | ++                         | t                 | g   | t   | t       | t     | t        | t        | g    | g  | g      | g     | g       | g    | g     | g    | g     |        |          |         |          | t        | t         | t         |         |
| a            | 3359071      | c            | 3494747      | s                          | a                                    | CFT073                     | ++                         | a                 | a   | a   | a       | a     | a        | a        | t    | a  | a      | a     | a       | c    | c     | a    | c     |        |          |         |          | a        | a         | a         |         |
| g            | 3359072      | t            | 3494748      | ns                         | g                                    | CFT073                     | ++                         | g                 | g   | g   | g       | g     | g        | g        | t    | g  | g      | g     | g       | t    | t     | g    | t     |        |          |         |          | g        | g         | g         |         |
| g            | 3359075      | a            | 3494751      | ns                         | g                                    | CFT073                     | ++                         | g                 | g   | g   | g       | g     | g        | g        | a    | g  | g      | g     | g       | a    | g     | a    |       |        |          |         | g        | g        | g         |           |         |
| a            | 3359077      | t            | 3494753      | ns                         | a                                    | CFT073                     | ++                         | a                 | a   | c   | a       | a     | a        | a        | t    | c  | c      | c     | c       | c    | c     | a    | c     |        |          |         |          | a        | a         | a         |         |
| c            | 3359080      | a            | 3494756      | s                          | c                                    | CFT073                     | ++                         | c                 | c   | c   | c       | c     | c        | c        | a    | c  | c      | c     | c       | a    | a     | c    | a     |        |          |         |          | c        | c         | c         |         |
| t            | 3359086      | c            | 3494762      | s                          | t                                    | CFT073                     | ++                         | t                 | t   | t   | t       | t     | t        | t        | c    | t  | t      | t     | t       | c    | c     | t    | c     |        |          |         |          | t        | t         | t         |         |
| a            | 3359087      | g            | 3494763      | ns                         | a                                    | CFT073                     | ++                         | a                 | a   | a   | a       | a     | a        | a        | g    | a  | a      | a     | a       | g    | a     | g    |       |        |          |         | a        | a        | a         |           |         |
| a            | 3359088      | g            | 3494764      | ns                         | a                                    | CFT073                     | ++                         | a                 | a   | a   | a       | a     | a        | a        | g    | a  | a      | a     | a       | g    | a     | g    |       |        |          |         | a        | a        | a         |           |         |
| c            | 3359089      | g            | 3494765      | ns                         | c                                    | CFT073                     | ++                         | c                 | c   | c   | c       | c     | c        | c        | g    | c  | c      | c     | c       | g    | g     | c    | g     |        |          |         |          | c        | c         | c         |         |
| a            | 3359101      | t            | 3494777      | s                          | a                                    | CFT073                     | ++                         | a                 | a   | a   | a       | a     | a        | a        | t    | a  | a      | a     | a       | t    | a     | a    |       |        |          |         | a        | a        | a         |           |         |
| g            | 3359104      | c            | 3494780      | s                          | g                                    | CFT073                     | ++                         | g                 | g   | g   | g       | g     | g        | g        | c    | g  | g      | g     | g       | c    | g     | c    |       |        |          |         | g        | g        | g         |           |         |
| c            | 3359107      | a            | 3494783      | s                          | a                                    | clone D                    | ++                         | a                 | a   | c   | c       | c     | c        | c        | a    | c  | c      | c     | c       | a    | a     | c    | a     |        |          |         |          | c        | a         | a         |         |
| g            | 3359109      | a            | 3494785      | ns                         | a                                    | clone D                    | ++                         | a                 | a   | g   | g       | g     | g        | g        | a    | a  | g      | g     | g       | a    | g     | a    |       |        |          |         | g        | a        | a         |           |         |
| g            | 3359119      | a            | 3494795      | s                          | g                                    | CFT073                     | ++                         | g                 | g   | g   | g       | g     | g        | g        | a    | g  | g      | g     | g       | t    | g     | t    |       |        |          |         | g        | g        | g         |           |         |
| t            | 3359200      | c            | 3494876      | s                          | c                                    | clone D                    | ++                         | c                 | c   | c   | c       | c     | c        | c        | c    | c  | c      | c     | c       | t    | c     | c    | c     |        |          |         |          | t        | c         | c         |         |
| a            | 3359211      | g            | 3494887      | ns                         | g                                    | clone D                    | ++                         | g                 | g   | g   | g       | g     | g        | g        | g    | g  | g      | g     | g       | g    | g     | g    | g     |        |          |         |          | g        | g         | g         |         |
| c            | 3359224      | g            | 3494900      | s                          | ?                                    | ?                          | +/-                        | t                 | c   | t   | t       | t     | t        | t        | g    | c  | t      | t     | t       | t    | t     | c    | t     |        |          |         |          | t        | t         | t         |         |
| g            | 3359242      | a            | 3494918      | s                          | g                                    | CFT073                     | ++                         | g                 | g   | g   | a       | a     | a        | a        | a    | g  | g      | g     | g       | g    | g     | g    |       |        |          |         | g        | a        | a         |           |         |
| t            | 3359277      | c            | 3494953      | nc                         | c                                    | clone D                    | ++                         | c                 | -   | t   | -       | -     | -        | -        | c    | -  | -      | -     | -       | t    | c     |      | c     |        |          |         | t        | c        | c         |           |         |
| a            | 3359288      | g            | 3494964      | nc                         | g                                    | clone D                    | ++                         | g                 | g   | g   | g       | g     | g        | g        | g    | g  | g      | g     | g       | g    | g     |      | g     |        |          |         | g        | g        | g         |           |         |
| t            | 3359298      | c            | 3494974      | nc                         | c                                    | clone D                    | ++                         | c                 | c   | c   | c       | c     | c        | c        | c    | c  | c      | c     | c       | c    | c     |      | c     |        |          |         | c        | c        | c         |           |         |



| Clone D base | Clone D site | CFT 073 base | CFT 073 site | mutation type <sup>a</sup> | Inferred ancestral base <sup>b</sup> | lineage inferred to mutate | Support level <sup>c</sup> | ED1a <sup>d</sup> | 536 | S88 | APEC O1 | UT189 | E2348/69 | ATCC8739 | K-12 | HS | SMS3-5 | IAI39 | E24377A | SE11 | 55989 | IAI1 | Sakai | UMN026 | B4 Sb227 | F5 8401 | SS Ss046 | D1 Sd197 | B18 BS512 | F2a 2457T | F2a 301 |   |
|--------------|--------------|--------------|--------------|----------------------------|--------------------------------------|----------------------------|----------------------------|-------------------|-----|-----|---------|-------|----------|----------|------|----|--------|-------|---------|------|-------|------|-------|--------|----------|---------|----------|----------|-----------|-----------|---------|---|
| a            | 3359324      | c            | 3495000      | nc                         | ?                                    | ?                          | +/-                        | t                 |     |     |         |       |          |          | c    |    |        |       |         | -    |       |      | t     |        |          |         |          |          |           | t         | t       |   |
| c            | 3359506      | a            | 3502073      | nc                         | c                                    | CFT073                     | ++                         | c                 |     |     |         |       |          |          |      |    |        |       |         |      | c     |      |       | c      |          |         |          |          |           |           | c       | c |
| a            | 3359631      | g            | 3502198      | nc                         | g                                    | clone D                    | ++                         | g                 |     |     |         |       |          |          |      |    |        |       |         |      | g     |      |       | g      |          |         |          |          |           |           | g       | g |
| g            | 3360045      | a            | 3502612      | nc                         | g                                    | CFT073                     | ++                         | g                 |     |     |         |       |          |          |      |    |        |       |         |      | g     |      |       | g      |          |         |          |          |           |           | g       | g |
| t            | 3360247      | a            | 3502814      | nc                         | t                                    | CFT073                     | ++                         | t                 |     |     |         |       |          |          |      |    |        |       |         |      | t     |      |       | t      |          |         |          |          |           | t         | t       |   |
| t            | 3361096      | c            | 3503663      | ns                         | c                                    | clone D                    | ++                         | c                 | c   | c   |         |       |          |          |      |    |        |       |         |      | c     |      |       | c      |          |         |          | c        |           | c         | c       |   |
| g            | 3361932      | a            | 3504499      | ns                         | g                                    | CFT073                     | ++                         | g                 | g   | g   | g       | g     | g        | g        | g    |    | g      | g     | g       | g    | g     |      | g     | g      |          |         | g        | g        | g         | g         | g       |   |
| g            | 3362618      | a            | 3505185      | ns                         | g                                    | CFT073                     | ++                         | g                 | g   | g   | g       | g     | g        | g        | a    |    | g      | g     | g       | g    | g     |      | g     | g      |          |         | g        | g        | g         | g         | g       |   |
| t            | 3362901      | c            | 3505468      | ns                         | t                                    | CFT073                     | ++                         | t                 | c   | c   | c       | c     | c        | c        | c    |    | c      | c     | c       | c    | c     |      | c     | c      |          |         | c        | c        | c         | c         | c       |   |
| a            | 3363111      | g            | 3505678      | ns                         | a                                    | CFT073                     | ++                         | a                 | g   | a   | a       | g     | g        | g        | a    |    | g      | g     | g       | g    | a     |      | g     | g      |          |         | g        | a        | g         | g         | g       |   |
| t            | 3363486      | c            | 3506053      | s                          | c                                    | clone D                    | ++                         | c                 | c   | c   | c       | c     | c        | c        | c    |    | c      | c     | c       | c    | c     |      | c     | c      |          |         | c        | c        | c         | c         | c       |   |
| c            | 3363551      | t            | 3506118      | ns                         | c                                    | CFT073                     | ++                         | c                 | c   | c   | c       | t     | c        | c        | c    |    | t      | c     | c       | c    | c     |      | c     | t      |          |         | t        | c        | c         | c         | c       |   |
| a            | 3363561      | g            | 3506128      | s                          | g                                    | clone D                    | ++                         | g                 | g   | g   | g       | g     | g        | g        | g    |    | g      | g     | g       | g    | g     |      | g     | g      |          |         | g        | g        | g         | g         | g       |   |
| g            | 3363566      | t            | 3506133      | ns                         | g                                    | CFT073                     | ++                         | g                 | -   | -   | -       | t     |          |          | -    |    | t      | -     | g       | g    | -     |      | -     | t      |          |         | t        | -        | g         | g         | g       |   |
| c            | 3363568      | a            | 3506135      | ns                         | a                                    | clone D                    | ++                         | a                 | -   | -   | -       | a     |          |          | -    |    | a      | -     | a       | a    | -     |      | -     | a      |          |         | a        | -        | a         | a         | a       |   |
| g            | 3363569      | a            | 3506136      | ns                         | g                                    | CFT073                     | ++                         | g                 | g   | g   | g       | g     |          |          | g    |    | g      | -     | g       | g    | g     |      | g     | g      |          |         | g        | g        | g         | g         | g       |   |
| a            | 3363577      | t            | 3506144      | ns                         | t                                    | clone D                    | ++                         | t                 | t   | t   | t       | t     |          |          | t    |    | t      | t     | a       | a    | t     |      | t     | t      |          |         | t        | t        | t         | t         | t       |   |
| g            | 3363845      | a            | 3506412      | ns                         | g                                    | CFT073                     | +                          |                   |     |     |         | g     |          |          |      |    | a      |       |         |      |       |      | g     |        |          |         |          | a        |           |           |         |   |
| c            | 3363861      | t            | 3506428      | ns                         | c                                    | CFT073                     | +                          |                   |     |     |         | c     |          |          |      |    | t      |       |         |      |       |      | c     |        |          |         |          | t        |           |           |         |   |
| a            | 3363863      | t            | 3506430      | ns                         | a                                    | CFT073                     | +                          |                   |     |     |         | a     |          |          |      |    | a      |       |         |      |       |      | a     |        |          |         |          | t        |           |           |         |   |
| g            | 3363866      | a            | 3506433      | ns                         | g                                    | CFT073                     | +                          |                   |     |     |         | g     |          |          |      |    | a      |       |         |      |       |      | g     |        |          |         |          | a        |           |           |         |   |
| c            | 3363870      | g            | 3506437      | ns                         | c                                    | CFT073                     | +                          |                   |     |     |         | c     |          |          |      |    | g      |       |         |      |       |      | c     |        |          |         |          | g        |           |           |         |   |
| a            | 3363877      | g            | 3506444      | ns                         | a                                    | CFT073                     | +                          |                   |     |     |         | a     |          |          |      |    | g      |       |         |      |       |      | a     |        |          |         |          | g        |           |           |         |   |
| a            | 3363887      | g            | 3506454      | ns                         | a                                    | CFT073                     | +                          |                   |     |     |         | a     |          |          |      |    | g      |       |         |      |       |      | a     |        |          |         |          | g        |           |           |         |   |
| t            | 3363888      | c            | 3506455      | ns                         | t                                    | CFT073                     | +                          |                   |     |     |         | t     |          |          |      |    | t      |       |         |      |       |      | t     |        |          |         |          | c        |           |           |         |   |
| c            | 3363893      | a            | 3506460      | ns                         | c                                    | CFT073                     | +                          |                   |     |     |         | c     |          |          |      |    | c      |       |         |      |       |      | c     |        |          |         |          | a        |           |           |         |   |
| t            | 3363896      | g            | 3506463      | s                          | t                                    | CFT073                     | +                          |                   |     |     |         | t     |          |          |      |    | g      |       |         |      |       |      | t     |        |          |         |          | g        |           |           |         |   |
| c            | 3363902      | g            | 3506469      | ns                         | c                                    | CFT073                     | +                          |                   |     |     |         | c     |          |          |      |    | c      |       |         |      |       |      | c     |        |          |         |          | g        |           |           |         |   |



| Clone D base | Clone D site | CFT 073 base | CFT 073 site | mutation type <sup>a</sup> | Inferred ancestral base <sup>b</sup> | lineage inferred to mutate | Support level <sup>c</sup> | ED1a <sup>d</sup> | 536 | S88 | APEC O1 | UT189 | E2348/69 | ATCC8739 | K-12 | HS | SMS3-5 | IAI39 | E24377A | SE11 | 55989 | IAI1 | Sakai | UMN026 | B4 Sb227 | F5 8401 | SS Ss046 | D1 Sd197 | B18 BS512 | F2a 2457T | F2a 301 |
|--------------|--------------|--------------|--------------|----------------------------|--------------------------------------|----------------------------|----------------------------|-------------------|-----|-----|---------|-------|----------|----------|------|----|--------|-------|---------|------|-------|------|-------|--------|----------|---------|----------|----------|-----------|-----------|---------|
| a            | 3364633      | g            | 3507200      | nc                         | a                                    | CFT073                     | ++                         | a                 | a   | a   | a       | a     |          |          | a    | a  | g      | a     | a       | a    | a     | a    | g     |        |          |         |          | a        | a         |           |         |
| a            | 3364637      | g            | 3507204      | nc                         | g                                    | clone D                    | ++                         | g                 | g   | g   | g       | g     |          |          | t    | g  | g      | g     | g       | g    | g     | g    | g     |        |          |         |          | g        | t         |           |         |
| t            | 3364643      | c            | 3507209      | nc                         | c                                    | clone D                    | ++                         | c                 | c   | t   | t       | t     |          |          | t    | c  | c      | c     | c       | c    | t     | t    | c     |        |          |         |          | c        | t         |           |         |
| a            | 3364648      | g            | 3507214      | nc                         | g                                    | clone D                    | ++                         | g                 | g   | a   | a       | a     |          |          | a    | a  | g      | g     | g       | g    | a     | a    | g     |        |          |         |          | a        | a         |           |         |
| c            | 3364655      | t            | 3507221      | nc                         | c                                    | CFT073                     | ++                         | c                 | c   | c   | c       | c     |          |          | c    | c  | c      | t     | t       | c    | c     | t    | c     |        |          |         |          | c        | c         |           |         |
| a            | 3364664      | c            | 3507230      | nc                         | c                                    | clone D                    | ++                         | c                 | c   | c   | c       | c     |          |          | a    | c  | c      | c     | c       | c    | c     | c    | c     |        |          |         |          | c        | a         |           |         |
| t            | 3364675      | c            | 3507241      | nc                         | c                                    | clone D                    | ++                         | c                 | t   | c   | c       | c     |          |          | t    | t  | c      | c     | c       | c    | c     | t    | c     |        |          |         |          | t        | t         |           |         |
| a            | 3364680      | t            | 3507246      | nc                         | a                                    | CFT073                     | ++                         | a                 | a   | a   | a       | a     |          |          | a    | a  | a      | a     | a       | a    | a     | a    | t     |        |          |         |          | a        | a         |           |         |
| g            | 3364812      | a            | 3507379      | ns                         | g                                    | CFT073                     | ++                         | g                 | a   | g   | g       | g     | g        | a        | g    | g  | g      | g     | g       | g    | g     | g    | g     |        |          |         |          | g        | g         | g         | g       |
| a            | 3364944      | t            | 3507511      | ns                         | t                                    | clone D                    | ++                         | t                 | t   | t   | t       | t     | t        | t        | t    | t  | t      | t     | t       | t    | t     | t    | t     |        |          |         |          | t        | t         | t         | t       |
| t            | 3365279      | c            | 3507846      | ns                         | c                                    | clone D                    | ++                         | c                 | c   | c   | c       | c     | c        | t        |      |    | -      | c     | c       | c    | c     | c    | t     |        |          |         |          | c        |           | c         | c       |
| a            | 3365280      | c            | 3507847      | ns                         | ?                                    | ?                          | +/-                        | g                 | g   | c   | c       | g     | g        | c        |      |    | -      | g     | c       | c    | c     | g    | a     |        |          |         |          | g        |           | c         | c       |
| a            | 3365554      | g            | 3508121      | ns                         | g                                    | clone D                    | ++                         | g                 | g   | g   | g       | g     | g        | g        |      |    | g      | g     | g       | g    | g     | g    | g     |        |          |         |          | g        |           | g         | g       |
| t            | 3365639      | g            | 3508206      | nc                         | g                                    | clone D                    | ++                         | g                 | g   | g   | g       | g     | g        | a        |      |    | g      | g     | g       | g    | g     | g    | g     |        |          |         |          | g        |           | g         | g       |
| t            | 3365781      | a            | 3508348      | nc                         | t                                    | CFT073                     | ++                         | t                 | t   | t   | t       | t     | t        | t        |      |    | a      | t     | t       | t    | t     | t    | t     |        |          |         |          | t        |           | t         | t       |
| c            | 3365801      | a            | 3508368      | nc                         | c                                    | CFT073                     | ++                         | c                 | c   | c   | c       | c     | c        | a        |      |    | a      | c     | c       | c    | c     | c    | a     |        |          |         |          | c        |           | c         | c       |
| c            | 3365825      | t            | 3508392      | nc                         | c                                    | CFT073                     | ++                         | c                 | c   | c   | c       | c     | c        | t        |      |    | c      | c     | c       | c    | c     | c    | t     |        |          |         |          | c        |           | c         | c       |
| t            | 3365848      | c            | 3508415      | nc                         | c                                    | clone D                    | ++                         | c                 | t   | t   | t       | c     | c        | c        |      |    | t      | t     | t       | t    | t     | c    | t     |        |          |         |          | c        |           | t         | t       |
| c            | 3365850      | g            | 3508417      | nc                         | g                                    | clone D                    | ++                         | g                 | c   | c   | c       | g     | g        | g        |      |    | c      | c     | c       | c    | c     | g    | c     |        |          |         |          | g        |           | c         | c       |
| g            | 3365864      | a            | 3508431      | nc                         | a                                    | clone D                    | ++                         | a                 | a   | g   | g       | g     | a        | c        |      |    | g      | g     | g       | g    | g     | a    | g     |        |          |         |          | g        |           | g         | g       |
| a            | 3365870      | c            | 3508437      | nc                         | c                                    | clone D                    | ++                         | c                 | c   | a   | a       | a     | c        | a        |      |    | a      | a     | a       | a    | c     | c    | a     |        |          |         |          | a        |           | c         | c       |
| a            | 3365871      | t            | 3508438      | nc                         | t                                    | clone D                    | ++                         | t                 | a   | a   | a       | a     | t        | t        |      |    | a      | a     | a       | a    | t     | t    | a     |        |          |         |          | a        |           | t         | t       |
| a            | 3365872      | g            | 3508439      | nc                         | g                                    | clone D                    | ++                         | g                 | g   | a   | a       | a     | g        | -        |      |    | a      | a     | a       | a    | g     | g    | a     |        |          |         |          | a        |           | g         | g       |
| c            | 3365874      | a            | 3508441      | nc                         | c                                    | CFT073                     | +                          | g                 | a   | c   | c       | c     | a        | -        |      |    | c      | c     | c       | c    | a     | a    | c     |        |          |         |          | c        |           | a         | a       |
| a            | 3365883      | t            | 3508450      | nc                         | t                                    | clone D                    | ++                         | t                 | a   | a   | a       | a     | t        | -        |      |    | t      | a     | a       | a    | t     | t    | a     |        |          |         |          | a        |           | t         | t       |
| a            | 3365885      | t            | 3508452      | nc                         | t                                    | clone D                    | ++                         | t                 | c   | c   | c       | a     | t        | -        |      |    | t      | c     | c       | c    | t     | t    | a     |        |          |         |          | a        |           | t         | t       |
| g            | 3365890      | t            | 3508457      | nc                         | t                                    | clone D                    | ++                         | t                 | t   | a   | a       | g     | t        | a        |      |    | t      | a     | a       | a    | t     | t    | g     |        |          |         |          | g        |           | t         | t       |
| a            | 3365896      | t            | 3508463      | s                          | t                                    | clone D                    | ++                         | t                 | a   | a   | a       | a     | a        | a        |      |    | t      | a     | a       | a    | t     | a    | a     |        |          |         |          | a        |           | t         | t       |

| Clone D base | Clone D site | CFT 073 base | CFT 073 site | mutation type <sup>a</sup> | Inferred ancestral base <sup>b</sup> | lineage inferred to mutate | Support level <sup>c</sup> | ED1a <sup>d</sup> | 536 | S88 | APEC O1 | UT189 | E2348/69 | ATCC8739 | K-12 | HS | SMS3-5 | IAI39 | E24377A | SE11 | 55989 | IAI1 | Sakai | UMN026 | B4 Sb227 | F5 8401 | SS Ss046 | D1 Sd197 | B18 BS512 | F2a 2457T | F2a 301 |
|--------------|--------------|--------------|--------------|----------------------------|--------------------------------------|----------------------------|----------------------------|-------------------|-----|-----|---------|-------|----------|----------|------|----|--------|-------|---------|------|-------|------|-------|--------|----------|---------|----------|----------|-----------|-----------|---------|
| a            | 3365906      | g            | 3508473      | ns                         | g                                    | clone D                    | ++                         | g                 | a   | a   | a       | a     | a        | c        |      |    | c      | a     | a       | g    |       |      | a     | a      |          |         |          | a        | g         | g         |         |
| t            | 3365907      | c            | 3508474      | ns                         | t                                    | CFT073                     | ++                         | t                 | t   | t   | t       | t     | t        | t        |      |    | t      | t     | t       | c    |       |      | t     | t      |          |         |          | t        | c         | c         |         |
| c            | 3365914      | t            | 3508481      | s                          | t                                    | clone D                    | ++                         | t                 | t   | t   | t       | c     | t        | a        |      |    | t      | t     | t       | t    |       |      | t     | c      |          |         |          | c        | t         | t         |         |
| c            | 3365921      | g            | 3508488      | ns                         | g                                    | clone D                    | ++                         | g                 | g   | g   | g       | g     | g        | g        |      |    | g      | g     | g       | g    |       |      | g     | c      |          |         |          | g        | g         | g         |         |
| a            | 3365932      | g            | 3508499      | s                          | g                                    | clone D                    | ++                         | g                 | a   | g   | g       | a     | g        | c        |      |    | g      | g     | g       | g    |       |      | g     | a      |          |         |          | a        | g         | g         |         |
| c            | 3365941      | a            | 3508508      | ns                         | c                                    | CFT073                     | ++                         | c                 | c   | c   | c       | c     | c        | c        |      |    | c      | c     | c       | c    |       |      | c     | c      |          |         |          | c        | c         | c         |         |
| g            | 3365964      | a            | 3508531      | ns                         | g                                    | CFT073                     | ++                         | g                 | g   | g   | g       | g     | g        | a        |      |    | g      | g     | g       | g    |       |      | g     | g      |          |         |          | g        | g         | g         |         |
| g            | 3365986      | a            | 3508553      | s                          | g                                    | CFT073                     | ++                         | g                 | g   | t   | t       | g     | g        | t        |      |    | g      | t     | g       | g    |       |      | g     | g      |          |         |          | g        | g         | g         |         |
| g            | 3365990      | a            | 3508557      | ns                         | a                                    | clone D                    | ++                         | a                 | g   | g   | g       | a     | a        | g        |      |    | a      | g     | a       | a    |       |      | a     | g      |          |         |          | a        | a         | a         |         |
| g            | 3365992      | a            | 3508559      | ns                         | a                                    | clone D                    | ++                         | a                 | g   | a   | a       | a     | a        | g        |      |    | a      | a     | a       | a    |       |      | a     | g      |          |         |          | a        | a         | a         |         |
| a            | 3366028      | t            | 3508595      | s                          | t                                    | clone D                    | ++                         | t                 | a   | a   | a       | t     | t        | c        |      |    | t      | a     | t       | t    |       |      | t     | t      |          |         |          | t        | t         | t         |         |
| a            | 3366040      | t            | 3508607      | s                          | a                                    | CFT073                     | ++                         | a                 | a   | g   | g       | a     | g        | g        |      |    | a      | g     | a       | a    |       |      | g     | a      |          |         |          | a        | a         | a         |         |
| a            | 3366046      | g            | 3508613      | s                          | a                                    | CFT073                     | ++                         | a                 | a   | a   | a       | a     | g        | c        |      |    | a      | a     | a       | a    |       |      | g     | g      |          |         |          | a        | a         | a         |         |
| t            | 3366052      | c            | 3508619      | s                          | t                                    | CFT073                     | ++                         | t                 | t   | c   | c       | t     | c        | t        |      |    | t      | c     | t       | t    |       |      | c     | c      |          |         |          | t        | t         | t         |         |
| g            | 3366068      | a            | 3508635      | ns                         | g                                    | CFT073                     | ++                         | g                 | g   | g   | g       | g     | g        | g        |      |    | g      | g     | g       | g    |       |      | g     | g      |          |         |          | g        | g         | g         |         |
| t            | 3366072      | g            | 3508639      | ns                         | t                                    | CFT073                     | ++                         | t                 | t   | t   | t       | t     | c        | t        |      |    | c      | t     | c       | t    |       |      | c     | g      |          |         |          | t        | t         | t         |         |
| g            | 3366082      | c            | 3508649      | s                          | c                                    | clone D                    | ++                         | c                 | g   | g   | g       | c     | c        | t        |      |    | c      | g     | c       | c    |       |      | c     | c      |          |         |          | c        | c         | c         |         |
| g            | 3366127      | t            | 3508694      | s                          | g                                    | CFT073                     | ++                         | g                 | t   | g   | g       | t     | c        | a        |      |    | c      | g     | t       | g    |       |      | c     | g      |          |         |          | t        | g         | g         |         |
| c            | 3366133      | g            | 3508700      | s                          | c                                    | CFT073                     | ++                         | c                 | c   | a   | a       | a     | a        | g        |      |    | a      | a     | a       | c    |       |      | a     | c      |          |         |          | a        | c         | c         |         |
| t            | 3366157      | c            | 3508724      | s                          | c                                    | clone D                    | ++                         | c                 | t   | t   | t       | t     | t        | t        |      |    | t      | t     | c       | t    |       |      | t     | t      |          |         |          | t        | t         | t         |         |
| c            | 3366160      | t            | 3508727      | s                          | t                                    | clone D                    | ++                         | t                 | c   | c   | c       | c     | t        | c        |      |    | t      | c     | t       | t    |       |      | t     | c      |          |         |          | c        | t         | t         |         |
| t            | 3366163      | c            | 3508730      | s                          | c                                    | clone D                    | ++                         | c                 | t   | t   | t       | t     | t        | t        |      |    | c      | t     | c       | t    |       |      | t     | t      |          |         |          | t        | t         | t         |         |
| c            | 3366166      | t            | 3508733      | s                          | c                                    | CFT073                     | ++                         | c                 | t   | a   | a       | c     | c        | c        |      |    | a      | a     | c       | c    |       |      | c     | c      |          |         |          | c        | c         | c         |         |
| a            | 3366192      | g            | 3508759      | ns                         | g                                    | clone D                    | ++                         | g                 | g   | g   | g       | g     | g        | a        |      |    | g      | g     | g       | g    |       |      | g     | g      |          |         |          | g        | g         | g         |         |
| g            | 3366197      | a            | 3508764      | ns                         | g                                    | CFT073                     | ++                         | g                 | g   | g   | g       | g     | g        | g        |      |    | g      | g     | g       | g    |       |      | g     | g      |          |         |          | g        | g         | g         |         |
| g            | 3366205      | t            | 3508772      | s                          | g                                    | CFT073                     | ++                         | g                 | t   | t   | t       | t     | g        | t        |      |    | t      | t     | g       | g    |       |      | g     | g      |          |         |          | t        | g         | g         |         |
| a            | 3366208      | c            | 3508775      | s                          | a                                    | CFT073                     | ++                         | a                 | c   | c   | c       | c     | a        | g        |      |    | c      | c     | a       | t    |       |      | a     | a      |          |         |          | c        | t         | t         |         |
| a            | 3366228      | g            | 3508795      | ns                         | g                                    | clone D                    | ++                         | g                 | g   | g   | g       | g     | g        | g        |      |    | g      | g     | g       | g    |       |      | g     | a      |          |         |          | g        | g         | g         |         |

| Clone D base | Clone D site | CFT 073 base | CFT 073 site | mutation type <sup>a</sup> | Inferred ancestral base <sup>b</sup> | lineage inferred to mutate | Support level <sup>c</sup> | ED1a <sup>d</sup> | 536 | S88 | APEC O1 | UT189 | E2348/69 | ATCC8739 | K-12 | HS | SMS3-5 | IAI39 | E24377A | SE11 | 55989 | IAI1 | Sakai | UMN026 | B4 Sb227 | F5 8401 | SS Ss046 | D1 Sd197 | B18 BS512 | F2a 2457T | F2a 301 |
|--------------|--------------|--------------|--------------|----------------------------|--------------------------------------|----------------------------|----------------------------|-------------------|-----|-----|---------|-------|----------|----------|------|----|--------|-------|---------|------|-------|------|-------|--------|----------|---------|----------|----------|-----------|-----------|---------|
| c            | 3366244      | g            | 3508811      | s                          | c                                    | CFT073                     | ++                         | c                 | g   | a   | a       | a     | g        | g        |      | g  | a      | g     | g       | g    | g     | c    |       |        |          |         | a        | g        | g         |           |         |
| c            | 3366262      | t            | 3508829      | s                          | c                                    | CFT073                     | ++                         | c                 | t   | t   | t       | t     | t        | c        |      | t  | t      | t     | t       | t    | t     | t    | c     |        |          |         | t        | t        | t         | t         |         |
| g            | 3366280      | a            | 3508847      | s                          | a                                    | clone D                    | ++                         | a                 | g   | a   | a       | a     | a        | a        |      | a  | a      | a     | a       | a    | a     | a    | g     |        |          | a       | a        | a        | a         | a         |         |
| t            | 3366286      | c            | 3508853      | s                          | c                                    | clone D                    | ++                         | c                 | t   | c   | c       | t     | c        | t        |      | c  | c      | c     | c       | c    | c     | c    | t     |        |          | t       | c        | c        | c         | c         |         |
| c            | 3366289      | t            | 3508856      | s                          | t                                    | clone D                    | ++                         | t                 | c   | t   | t       | t     | t        | t        |      | t  | t      | t     | t       | t    | t     | t    | c     |        |          | t       | t        | t        | t         | t         |         |
| t            | 3366295      | c            | 3508862      | s                          | c                                    | clone D                    | ++                         | c                 | c   | c   | c       | t     | c        | c        |      | c  | c      | c     | c       | c    | c     | c    | t     |        |          | t       | c        | c        | c         | c         |         |
| g            | 3366298      | a            | 3508865      | s                          | a                                    | clone D                    | ++                         | a                 | a   | a   | a       | g     | a        | g        |      | a  | a      | a     | a       | a    | a     | a    | g     |        |          | g       | a        | a        | a         | a         |         |
| g            | 3366302      | a            | 3508869      | ns                         | g                                    | CFT073                     | ++                         | g                 | g   | g   | g       | g     | g        | g        |      | g  | g      | g     | g       | g    | g     | g    | g     |        |          | g       | g        | g        | g         | g         |         |
| t            | 3366319      | c            | 3508886      | s                          | t                                    | CFT073                     | ++                         | t                 | t   | c   | c       | t     | t        | c        |      | c  | c      | t     | c       | c    | t     | c    | t     | t      |          |         | t        | c        | c         | c         |         |
| c            | 3366328      | g            | 3508895      | ns                         | ?                                    | ?                          | +/-                        | a                 | g   | a   | a       | a     | g        | g        |      | a  | a      | g     | a       | a    | g     | a    | g     | c      |          |         | a        | a        | a         | a         |         |
| a            | 3366340      | g            | 3508907      | s                          | a                                    | CFT073                     | ++                         | a                 | a   | a   | a       | a     | a        | c        |      | a  | a      | g     | a       | a    | g     | g    | a     | a      |          |         | a        | g        | g         | g         |         |
| t            | 3366343      | a            | 3508910      | s                          | a                                    | clone D                    | ++                         | a                 | g   | g   | g       | a     | g        | a        |      | g  | g      | g     | a       | g    | g     | a    | g     | t      |          |         | a        | a        | a         | a         |         |
| c            | 3366353      | g            | 3508920      | ns                         | g                                    | clone D                    | ++                         | g                 | g   | g   | g       | c     | g        | g        |      | g  | g      | g     | g       | g    | g     | g    | c     |        |          | c       | g        | g        | g         | g         |         |
| a            | 3366361      | g            | 3508928      | s                          | a                                    | CFT073                     | ++                         | a                 | g   | g   | g       | a     | a        | a        |      | g  | g      | g     | a       | a    | a     | a    | a     | a      |          |         | a        | a        | a         | a         |         |
| g            | 3366364      | a            | 3508931      | s                          | g                                    | CFT073                     | ++                         | g                 | a   | a   | a       | g     | g        | t        |      | a  | a      | a     | a       | a    | a     | g    | g     | t      |          |         | g        | g        | g         | g         |         |
| c            | 3366379      | t            | 3508946      | s                          | c                                    | CFT073                     | ++                         | c                 | c   | c   | c       | c     | c        | t        |      | c  | c      | c     | c       | c    | c     | c    | c     | c      |          |         | c        | c        | c         | c         |         |
| t            | 3366388      | c            | 3508955      | s                          | t                                    | CFT073                     | ++                         | t                 | t   | t   | t       | t     | t        | t        |      | t  | t      | t     | t       | t    | t     | c    | t     | t      |          |         | t        | c        | c         | c         |         |
| g            | 3366390      | c            | 3508957      | ns                         | c                                    | clone D                    | ++                         | c                 | g   | g   | g       | g     | g        | c        |      | g  | g      | c     | c       | c    | c     | c    | g     | g      |          |         | g        | c        | c         | c         |         |
| c            | 3366391      | t            | 3508958      | ns                         | c                                    | CFT073                     | ++                         | c                 | c   | c   | c       | c     | c        | -        |      | c  | c      | a     | a       | a    | a     | a    | c     | c      |          |         | c        | a        | a         | a         |         |
| c            | 3366406      | a            | 3508973      | s                          | c                                    | CFT073                     | ++                         | c                 | c   | c   | c       | c     | c        | g        |      | c  | c      | c     | c       | c    | c     | c    | c     | c      |          |         | c        | c        | c         | c         |         |
| a            | 3366408      | g            | 3508975      | ns                         | g                                    | clone D                    | ++                         | g                 | g   | g   | g       | a     | g        | c        |      | g  | g      | g     | a       | a    | a     | g    | a     | a      |          |         | a        | g        | g         | g         |         |
| t            | 3366415      | c            | 3508982      | s                          | t                                    | CFT073                     | ++                         | t                 | t   | t   | t       | t     | t        | t        |      | t  | t      | t     | t       | t    | t     | t    | t     | t      |          |         | t        | t        | t         | t         |         |
| c            | 3366418      | t            | 3508985      | s                          | c                                    | CFT073                     | ++                         | c                 | c   | c   | c       | c     | c        | c        |      | c  | c      | c     | c       | c    | c     | c    | c     | c      |          |         | c        | c        | c         | c         |         |
| g            | 3366419      | a            | 3508986      | ns                         | g                                    | CFT073                     | ++                         | g                 | g   | g   | g       | g     | g        | g        |      | g  | g      | g     | g       | g    | g     | g    | g     | g      |          |         | g        | g        | g         | g         |         |
| a            | 3366445      | g            | 3509012      | s                          | a                                    | CFT073                     | ++                         | a                 | g   | g   | g       | g     | g        | g        |      | g  | g      | g     | g       | g    | g     | g    | a     | a      |          |         | g        | g        | g         | g         |         |
| g            | 3366449      | a            | 3509016      | ns                         | g                                    | CFT073                     | ++                         | g                 | g   | g   | g       | g     | g        | g        |      | g  | g      | g     | g       | g    | g     | g    | g     | g      |          |         | g        | g        | g         | g         |         |
| g            | 3366454      | t            | 3509021      | ns                         | g                                    | CFT073                     | ++                         | g                 | t   | t   | t       | g     | t        | t        |      | t  | t      | t     | t       | t    | t     | t    | g     | g      |          |         | g        | t        | t         | t         |         |
| g            | 3366469      | a            | 3509036      | s                          | g                                    | CFT073                     | ++                         | g                 | g   | g   | g       | g     | a        | c        |      | g  | g      | g     | a       | a    | a     | g    | a     | g      |          |         | g        | g        | g         | g         |         |

| Clone D base | Clone D site | CFT 073 base | CFT 073 site | mutation type <sup>a</sup> | Inferred ancestral base <sup>b</sup> | lineage inferred to mutate | Support level <sup>c</sup> | ED1a <sup>d</sup> | 536 | S88 | APEC O1 | UT189 | E2348/69 | ATCC8739 | K-12 | HS | SMS3-5 | IAI39 | E24377A | SE11 | 55989 | IAI1 | Sakai | UMN026 | B4 Sb227 | F5 8401 | SS Ss046 | D1 Sd197 | B18 BS512 | F2a 2457T | F2a 301 |
|--------------|--------------|--------------|--------------|----------------------------|--------------------------------------|----------------------------|----------------------------|-------------------|-----|-----|---------|-------|----------|----------|------|----|--------|-------|---------|------|-------|------|-------|--------|----------|---------|----------|----------|-----------|-----------|---------|
| g            | 3366476      | a            | 3509043      | ns                         | g                                    | CFT073                     | ++                         | g                 | g   | g   | g       | g     | g        | c        |      | g  | g      | g     |         | a    | g     | g    |       |        |          |         | g        | a        | a         |           |         |
| a            | 3366478      | t            | 3509045      | ns                         | a                                    | CFT073                     | ++                         | a                 | a   | a   | a       | a     | t        | t        |      | a  | a      | t     |         | t    | t     | a    |       |        |          |         | a        | t        | t         |           |         |
| t            | 3366481      | c            | 3509048      | s                          | t                                    | CFT073                     | ++                         | t                 | t   | t   | t       | t     | c        | c        |      | t  | t      | t     |         | c    | c     | t    |       |        |          |         | t        | c        | c         |           |         |
| t            | 3366490      | c            | 3509057      | s                          | c                                    | clone D                    | ++                         | c                 | c   | c   | c       | c     | c        | t        |      | c  | c      | c     |         | c    | c     | t    |       |        |          |         | c        | c        | c         |           |         |
| c            | 3366493      | t            | 3509060      | s                          | c                                    | CFT073                     | ++                         | c                 | t   | c   | c       | c     | t        | c        |      | c  | c      | t     |         | c    | t     | c    |       |        |          |         | c        | c        | c         |           |         |
| g            | 3366508      | a            | 3509075      | s                          | a                                    | clone D                    | ++                         | a                 | a   | g   | g       | g     | g        | g        |      | g  | g      | a     |         | a    | g     | g    |       |        |          |         | g        | a        | a         |           |         |
| g            | 3366522      | a            | 3509089      | ns                         | g                                    | CFT073                     | ++                         | g                 | g   | g   | g       | g     | g        | g        |      | g  | g      | g     |         | g    | g     | g    |       |        |          |         | g        | g        | g         |           |         |
| c            | 3366532      | t            | 3509099      | s                          | c                                    | CFT073                     | ++                         | c                 | c   | t   | t       | c     | c        | t        |      | c  | t      | c     |         | c    | c     | c    |       |        |          |         | c        | c        | c         |           |         |
| g            | 3366540      | a            | 3509107      | ns                         | g                                    | CFT073                     | ++                         | g                 | a   | a   | a       | a     | a        | a        |      | a  | a      | a     |         | a    | a     | g    |       |        |          |         | a        | a        | a         |           |         |
| t            | 3366550      | c            | 3509117      | s                          | t                                    | CFT073                     | ++                         | t                 | c   | c   | c       | c     | c        | c        |      | c  | c      | c     |         | c    | c     | t    |       |        |          |         | c        | c        | c         |           |         |
| t            | 3366555      | c            | 3509122      | ns                         | t                                    | CFT073                     | ++                         | t                 | c   | c   | c       | c     | c        | c        |      | c  | c      | c     |         | c    | c     | t    |       |        |          |         | c        | c        | c         |           |         |
| c            | 3366556      | t            | 3509123      | ns                         | c                                    | CFT073                     | ++                         | c                 | c   | c   | c       | t     | c        | c        |      | c  | c      | t     |         | t    | c     | c    |       |        |          |         | t        | t        | t         |           |         |
| g            | 3366562      | t            | 3509129      | s                          | g                                    | CFT073                     | ++                         | g                 | t   | t   | t       | t     | t        | t        |      | t  | t      | t     |         | t    | t     | g    |       |        |          |         | t        | t        | t         |           |         |
| a            | 3366570      | g            | 3509137      | ns                         | a                                    | CFT073                     | ++                         | a                 | a   | a   | a       | a     | a        | a        |      | a  | a      | a     |         | g    | a     | a    |       |        |          |         | a        | g        | g         |           |         |
| g            | 3366579      | a            | 3509146      | ns                         | g                                    | CFT073                     | ++                         | g                 | a   | a   | a       | g     | a        | a        |      | a  | a      | a     |         | a    | a     | g    |       |        |          |         | g        | a        | a         |           |         |
| c            | 3366580      | g            | 3509147      | ns                         | c                                    | CFT073                     | ++                         | c                 | g   | c   | c       | g     | g        | -        |      | g  | c      | g     |         | g    | g     | c    |       |        |          |         | g        | g        | g         |           |         |
| c            | 3366592      | t            | 3509159      | s                          | c                                    | CFT073                     | ++                         | c                 | t   | t   | t       | a     | t        | c        |      | t  | t      | t     |         | t    | t     | c    |       |        |          |         | a        | t        | t         |           |         |
| c            | 3366597      | a            | 3509164      | ns                         | a                                    | clone D                    | +                          | t                 | a   | c   | c       | a     | a        | a        |      | a  | c      | a     |         | a    | a     | c    |       |        |          |         | a        | a        | a         |           |         |
| t            | 3366599      | c            | 3509166      | ns                         | t                                    | CFT073                     | ++                         | t                 | t   | t   | t       | t     | a        | c        |      | g  | t      | g     |         | c    | a     | t    |       |        |          |         | t        | c        | c         |           |         |
| t            | 3366610      | c            | 3509177      | s                          | t                                    | CFT073                     | ++                         | t                 | t   | t   | t       | t     | t        | t        |      | t  | t      | t     |         | c    | t     | t    |       |        |          |         | t        | c        | c         |           |         |
| g            | 3366613      | a            | 3509180      | s                          | g                                    | CFT073                     | ++                         | g                 | g   | g   | g       | g     | g        | g        |      | g  | g      | g     |         | g    | g     | g    |       |        |          |         | g        | g        | g         |           |         |
| a            | 3367165      | g            | 3509732      | ns                         | a                                    | CFT073                     | +                          |                   |     |     |         |       |          |          |      |    |        | g     |         |      |       |      |       |        |          |         |          |          |           |           |         |
| a            | 3368458      | g            | 3511026      | nc                         | a                                    | CFT073                     | ++                         | a                 | a   | a   | a       | a     |          |          |      | a  |        |       |         |      |       |      |       |        |          |         |          |          |           |           |         |
| g            | 3368624      | c            | 3511192      | ns                         | g                                    | CFT073                     | ++                         | g                 | t   | g   | g       | g     |          |          |      | g  |        |       |         |      |       |      |       |        |          |         | g        |          |           |           |         |
| t            | 3369004      | c            | 3511572      | s                          | c                                    | clone D                    | ++                         | c                 | c   | c   | c       | c     |          |          |      | c  |        |       |         |      |       |      |       |        |          |         | t        |          |           |           |         |
| t            | 3369013      | c            | 3511581      | ns                         | c                                    | clone D                    | ++                         | c                 | c   | c   | c       | c     |          |          |      | c  |        |       |         |      |       |      |       |        |          |         | t        |          |           |           |         |
| t            | 3369020      | c            | 3511588      | ns                         | t                                    | CFT073                     | ++                         | t                 | t   | t   | t       | t     |          |          |      | t  |        |       |         |      |       |      |       |        |          |         | t        |          |           |           |         |
| a            | 3369073      | g            | 3511641      | nc                         | g                                    | clone D                    | ++                         | g                 | g   | g   | g       | g     |          |          |      | g  |        |       |         |      |       |      |       |        |          |         | a        |          |           |           |         |

| Clone D base | Clone D site | CFT 073 base | CFT 073 site | mutation type <sup>a</sup> | Inferred ancestral base <sup>b</sup> | lineage inferred to mutate | Support level <sup>c</sup> | ED1a <sup>d</sup> | 536 | S88 | APEC O1 | UT189 | E2348/69 | ATCC8739 | K-12 | HS | SMS3-5 | IAI39 | E24377A | SE11 | 55989 | IAI1 | Sakai | UMN026 | B4 Sb227 | F5 8401 | SS Ss046 | D1 Sd197 | B18 BS512 | F2a 2457T | F2a 301 |
|--------------|--------------|--------------|--------------|----------------------------|--------------------------------------|----------------------------|----------------------------|-------------------|-----|-----|---------|-------|----------|----------|------|----|--------|-------|---------|------|-------|------|-------|--------|----------|---------|----------|----------|-----------|-----------|---------|
| c            | 3369091      | a            | 3511659      | nc                         | c                                    | CFT073                     | ++                         | c                 | c   | c   | c       | c     |          |          |      |    | c      |       |         |      |       |      |       | c      |          |         |          |          |           |           |         |
| c            | 3369092      | a            | 3511660      | nc                         | c                                    | CFT073                     | ++                         | c                 | c   | c   | c       | c     |          |          |      |    | c      |       |         |      |       |      |       | c      |          |         |          |          |           |           |         |
| g            | 3369093      | t            | 3511661      | nc                         | a                                    | clone D                    | ++                         | a                 | g   | g   | t       | g     |          |          |      |    | g      |       |         |      |       |      |       | g      |          |         |          |          |           |           |         |
| a            | 3369094      | c            | 3511662      | nc                         | c                                    | clone D                    | ++                         | c                 | c   | c   | c       | c     |          |          |      |    | c      |       |         |      |       |      |       | a      |          |         |          |          |           |           |         |
| t            | 3369096      | c            | 3511664      | nc                         | c                                    | clone D                    | ++                         | c                 | c   | -   | -       | -     |          |          |      |    | c      |       |         |      |       |      |       | t      |          |         |          |          |           |           |         |
| t            | 3369211      | c            | 3511779      | nc                         | t                                    | CFT073                     | +                          | g                 | t   | t   | t       | t     |          |          |      |    | g      |       |         |      |       |      |       | t      |          |         |          |          |           |           |         |
| c            | 3369240      | t            | 3511808      | nc                         | t                                    | clone D                    | ++                         | t                 | t   | t   | t       | t     |          |          |      |    | t      |       |         |      |       |      |       | c      |          |         |          |          |           |           |         |
| g            | 3369479      | a            | 3512047      | nc                         | g                                    | CFT073                     | ++                         | g                 | g   | g   | g       | g     |          |          |      |    | g      |       |         |      |       |      |       | g      |          |         |          |          |           |           |         |
| g            | 3369745      | a            | 3512313      | ns                         | g                                    | CFT073                     | ++                         | g                 | g   | g   | g       | g     |          |          |      |    | g      |       |         |      |       |      |       | g      |          |         |          |          |           |           |         |
| c            | 3369916      | t            | 3512484      | s                          | c                                    | CFT073                     | ++                         | c                 | c   | c   | c       | c     |          |          |      |    | c      |       |         |      |       |      |       | c      |          |         |          |          |           |           |         |
| c            | 3369977      | t            | 3512545      | s                          | c                                    | CFT073                     | ++                         | c                 | c   | c   | c       | c     |          |          |      |    | c      |       |         |      |       |      |       | c      |          |         |          |          |           |           |         |
| c            | 3370318      | t            | 3512886      | s                          | c                                    | CFT073                     | ++                         | c                 | c   | c   | c       | c     |          |          |      |    | c      | c     |         |      |       |      |       | c      |          |         |          |          |           |           |         |
| a            | 3370335      | g            | 3512903      | ns                         | a                                    | CFT073                     | ++                         | a                 | a   | a   | a       | a     |          |          |      |    | a      | a     |         |      |       |      |       | a      |          |         |          |          |           |           |         |
| c            | 3370351      | t            | 3512919      | s                          | c                                    | CFT073                     | ++                         | c                 | c   | c   | c       | c     |          |          |      |    | t      | c     |         |      |       |      |       | c      |          |         |          |          |           |           |         |
| g            | 3370522      | t            | 3513090      | nc                         | g                                    | CFT073                     | ++                         | g                 | g   | t   | t       | t     |          |          |      |    | t      | g     |         |      |       |      |       | g      |          |         |          |          |           |           |         |
| a            | 3370656      | g            | 3513224      | s                          | a                                    | CFT073                     | ++                         | a                 | a   | a   | a       | a     |          |          |      |    | a      | a     |         |      |       |      |       | a      |          |         |          |          |           |           |         |
| g            | 3370665      | a            | 3513233      | s                          | g                                    | CFT073                     | ++                         | g                 | g   | g   | g       | g     |          |          |      |    | g      | g     |         |      |       |      |       | g      |          |         |          |          |           |           |         |
| t            | 3371250      | c            | 3513818      | s                          | t                                    | CFT073                     | ++                         | t                 | t   | t   | t       | t     |          |          |      |    | t      | t     |         |      |       |      |       | t      |          |         |          |          |           |           |         |
| c            | 3371671      | t            | 3514239      | s                          | c                                    | CFT073                     | ++                         | c                 | c   | c   | c       | c     |          |          |      |    | c      | c     |         |      |       |      |       | c      |          |         |          |          |           |           |         |
| g            | 3371673      | a            | 3514241      | s                          | g                                    | CFT073                     | ++                         | g                 | g   | g   | g       | g     |          |          |      |    | g      | g     |         |      |       |      |       | g      |          |         |          |          |           |           |         |
| a            | 3371811      | g            | 3514379      | ns                         | g                                    | clone D                    | ++                         | g                 | g   | g   | g       | g     |          |          |      |    | g      | g     |         |      |       |      |       | a      |          |         |          |          |           |           |         |
| c            | 3371812      | t            | 3514380      | ns                         | c                                    | CFT073                     | ++                         | c                 | c   | c   | c       | c     |          |          |      |    | c      | c     |         |      |       |      |       | c      |          |         |          |          |           |           |         |
| t            | 3372174      | c            | 3514742      | s                          | c                                    | clone D                    | ++                         | c                 | c   | c   | c       | c     |          |          |      |    | c      | c     |         |      |       |      |       | t      |          |         |          |          |           |           |         |
| c            | 3372413      | t            | 3514981      | s                          | c                                    | CFT073                     | ++                         | c                 | c   | c   | c       | c     |          |          |      |    | c      | c     |         |      |       |      |       | c      |          |         |          |          |           |           |         |
| a            | 3372449      | g            | 3515017      | s                          | g                                    | clone D                    | ++                         | g                 | g   | g   | g       | g     |          |          |      |    | g      | g     |         |      |       |      |       | a      |          |         |          |          |           |           |         |
| a            | 3372491      | g            | 3515059      | s                          | g                                    | clone D                    | ++                         | g                 | g   | g   | g       | g     |          |          |      |    | g      | g     |         |      |       |      |       | a      |          |         |          |          |           |           |         |
| a            | 3372695      | g            | 3515263      | s                          | a                                    | CFT073                     | ++                         | a                 | a   | a   | a       | a     |          |          |      |    | a      | a     |         |      |       |      |       | a      |          |         |          |          |           |           |         |
| t            | 3372698      | c            | 3515266      | s                          | t                                    | CFT073                     | ++                         | t                 | t   | t   | t       | t     |          |          |      |    | t      | t     |         |      |       |      |       | t      |          |         |          |          |           |           |         |

| Clone D base | Clone D site | CFT 073 base | CFT 073 site | mutation type <sup>a</sup> | Inferred ancestral base <sup>b</sup> | lineage inferred to mutate | Support level <sup>c</sup> | ED1a <sup>d</sup> | 536 | S88 | APEC O1 | UT189 | E2348/69 | ATCC8739 | K-12 | HS | SMS3-5 | IAI39 | E24377A | SE11 | 55989 | IAI1 | Sakai | UMN026 | B4 Sb227 | F5 8401 | SS Ss046 | D1 Sd197 | B18 BS512 | F2a 2457T | F2a 301 |
|--------------|--------------|--------------|--------------|----------------------------|--------------------------------------|----------------------------|----------------------------|-------------------|-----|-----|---------|-------|----------|----------|------|----|--------|-------|---------|------|-------|------|-------|--------|----------|---------|----------|----------|-----------|-----------|---------|
| c            | 3372734      | t            | 3515302      | s                          | c                                    | CFT073                     | ++                         | c                 | c   | c   | c       | c     |          |          |      |    | c      | c     |         |      |       |      |       | c      |          |         |          |          |           |           |         |
| t            | 3372789      | c            | 3515357      | s                          | c                                    | clone D                    | ++                         | c                 | c   | c   | c       | c     |          |          |      |    | c      | c     |         |      |       |      |       | t      |          |         |          |          |           |           |         |
| g            | 3372815      | a            | 3515383      | s                          | g                                    | CFT073                     | ++                         | g                 | g   | g   | g       | g     |          |          |      |    | g      | g     |         |      |       |      |       | g      |          |         |          |          |           |           |         |
| c            | 3372938      | a            | 3515506      | s                          | a                                    | clone D                    | ++                         | a                 | a   | a   | a       | a     |          |          |      |    | a      | a     |         |      |       |      |       | c      |          |         |          |          |           |           |         |
| g            | 3373148      | a            | 3515716      | s                          | a                                    | clone D                    | ++                         | a                 | a   | a   | a       | a     |          |          |      |    | a      | a     |         |      |       |      |       | g      |          |         |          |          |           |           |         |
| a            | 3373181      | g            | 3515749      | s                          | g                                    | clone D                    | ++                         | g                 | g   | g   | g       | g     |          |          |      |    | g      | g     |         |      |       |      |       | a      |          |         |          |          |           |           |         |
| g            | 3373184      | t            | 3515752      | s                          | t                                    | clone D                    | ++                         | t                 | t   | t   | t       | t     |          |          |      |    | t      | t     |         |      |       |      |       | g      |          |         |          |          |           |           |         |
| c            | 3373214      | t            | 3515782      | s                          | t                                    | clone D                    | ++                         | t                 | t   | t   | t       | t     |          |          |      |    | t      | t     |         |      |       |      |       | c      |          |         |          |          |           |           |         |
| g            | 3373274      | a            | 3515842      | s                          | a                                    | clone D                    | ++                         | a                 | a   | t   | t       | t     |          |          |      |    | g      | a     |         |      |       |      |       | g      |          |         |          |          |           |           |         |
| a            | 3373277      | c            | 3515845      | s                          | c                                    | clone D                    | ++                         | c                 | c   | c   | c       | c     |          |          |      |    | a      | c     |         |      |       |      |       | a      |          |         |          |          |           |           |         |
| t            | 3373286      | a            | 3515854      | s                          | a                                    | clone D                    | ++                         | a                 | a   | a   | a       | a     |          |          |      |    | t      | a     |         |      |       |      |       | t      |          |         |          |          |           |           |         |
| a            | 3373295      | g            | 3515863      | s                          | g                                    | clone D                    | ++                         | g                 | g   | g   | g       | g     |          |          |      |    | g      | g     |         |      |       |      |       | a      |          |         |          |          |           |           |         |
| g            | 3373307      | a            | 3515875      | s                          | a                                    | clone D                    | ++                         | a                 | a   | a   | a       | a     |          |          |      |    | a      | a     |         |      |       |      |       | g      |          |         |          |          |           |           |         |
| t            | 3373310      | g            | 3515878      | s                          | g                                    | clone D                    | ++                         | g                 | g   | g   | g       | g     |          |          |      |    | g      | g     |         |      |       |      |       | t      |          |         |          |          |           |           |         |
| c            | 3373352      | t            | 3515920      | s                          | c                                    | CFT073                     | ++                         | c                 | c   | c   | c       | c     |          |          |      |    | c      | c     |         |      |       |      |       | c      |          |         |          |          |           |           |         |
| g            | 3373430      | a            | 3515998      | nc                         | a                                    | clone D                    | ++                         | a                 | a   | a   | a       | a     |          |          |      |    | g      | a     |         |      |       |      |       | g      |          |         |          |          |           |           |         |
| a            | 3373448      | t            | 3516016      | s                          | a                                    | CFT073                     | ++                         | a                 | t   | a   | a       | a     |          |          |      |    | a      | a     |         |      |       |      |       | a      |          |         |          |          |           |           |         |
| t            | 3373460      | c            | 3516028      | s                          | t                                    | CFT073                     | ++                         | t                 | c   | t   | t       | t     |          |          |      |    | t      | t     |         |      |       |      |       | t      |          |         |          |          |           |           |         |
| c            | 3373469      | t            | 3516037      | s                          | t                                    | clone D                    | ++                         | t                 | t   | t   | t       | t     |          |          |      |    | c      | c     |         |      |       |      |       | c      |          |         |          |          |           |           |         |
| c            | 3373478      | a            | 3516046      | s                          | a                                    | clone D                    | ++                         | a                 | a   | a   | a       | a     |          |          |      |    | c      | c     |         |      |       |      |       | c      |          |         |          |          |           |           |         |
| c            | 3373561      | t            | 3516129      | ns                         | c                                    | CFT073                     | ++                         | c                 | c   | c   | c       | c     |          |          |      |    | c      | c     |         |      |       |      |       | c      |          |         |          |          |           |           |         |
| c            | 3373597      | a            | 3516165      | ns                         | a                                    | clone D                    | ++                         | a                 | c   | a   | a       | a     |          |          |      |    | c      | c     |         |      |       |      |       | c      |          |         |          |          |           |           |         |
| c            | 3373608      | a            | 3516176      | ns                         | a                                    | clone D                    | ++                         | a                 | c   | a   | a       | a     |          |          |      |    | a      | a     |         |      |       |      |       | c      |          |         |          |          |           |           |         |
| a            | 3373616      | g            | 3516184      | s                          | g                                    | clone D                    | ++                         | g                 | g   | g   | g       | g     |          |          |      |    | g      | g     |         |      |       |      |       | a      |          |         |          |          |           |           |         |
| g            | 3373622      | a            | 3516190      | s                          | a                                    | clone D                    | ++                         | a                 | a   | a   | a       | a     |          |          |      |    | a      | g     |         |      |       |      |       | g      |          |         |          |          |           |           |         |
| g            | 3373635      | t            | 3516203      | ns                         | g                                    | CFT073                     | ++                         | g                 | g   | g   | g       | g     |          |          |      |    | g      | g     |         |      |       |      |       | g      |          |         |          |          |           |           |         |
| t            | 3373713      | a            | 3516281      | ns                         | t                                    | CFT073                     | ++                         | t                 | t   | t   | t       | t     |          |          |      |    | t      | t     |         |      |       |      |       | t      |          |         |          |          |           |           |         |
| g            | 3373751      | a            | 3516319      | s                          | g                                    | CFT073                     | ++                         | g                 | g   | g   | g       | g     |          |          |      |    | g      | g     |         |      |       |      |       | g      |          |         |          |          |           |           |         |



| Clone D base | Clone D site | CFT 073 base | CFT 073 site | mutation type <sup>a</sup> | Inferred ancestral base <sup>b</sup> | lineage inferred to mutate | Support level <sup>c</sup> | ED1a <sup>d</sup> | 536 | S88 | APEC O1 | UT189 | E2348/69 | ATCC8739 | K-12 | HS | SMS3-5 | IAI39 | E24377A | SE11 | 55989 | IAI1 | Sakai | UMN026 | B4 Sb227 | F5 8401 | SS Ss046 | D1 Sd197 | B18 BS512 | F2a 2457T | F2a 301 |
|--------------|--------------|--------------|--------------|----------------------------|--------------------------------------|----------------------------|----------------------------|-------------------|-----|-----|---------|-------|----------|----------|------|----|--------|-------|---------|------|-------|------|-------|--------|----------|---------|----------|----------|-----------|-----------|---------|
| a            | 3373762      | g            | 3516330      | ns                         | a                                    | CFT073                     | ++                         | a                 | a   | a   | a       | a     |          |          |      |    | a      | a     |         |      |       |      |       | a      |          |         |          |          |           |           |         |
| c            | 3373770      | t            | 3516338      | s                          | t                                    | clone D                    | ++                         | t                 | t   | t   | t       | t     |          |          |      |    | t      | t     |         |      |       |      |       | c      |          |         |          |          |           |           |         |
| c            | 3373787      | t            | 3516355      | s                          | t                                    | clone D                    | ++                         | t                 | t   | t   | t       | t     |          |          |      |    | t      | t     |         |      |       |      |       | c      |          |         |          |          |           |           |         |
| t            | 3373790      | c            | 3516358      | s                          | c                                    | clone D                    | ++                         | c                 | c   | c   | c       | c     |          |          |      |    | c      | t     |         |      |       |      |       | t      |          |         |          |          |           |           |         |
| g            | 3373802      | a            | 3516370      | s                          | a                                    | clone D                    | ++                         | a                 | a   | a   | a       | a     |          |          |      |    | a      | g     |         |      |       |      |       | g      |          |         |          |          |           |           |         |
| c            | 3373834      | a            | 3516402      | ns                         | a                                    | clone D                    | ++                         | a                 | a   | a   | a       | a     |          |          |      |    | a      | a     |         |      |       |      |       | c      |          |         |          |          |           |           |         |
| g            | 3373842      | a            | 3516410      | ns                         | a                                    | clone D                    | ++                         | a                 | a   | a   | a       | a     |          |          |      |    | a      | a     |         |      |       |      |       | g      |          |         |          |          |           |           |         |
| t            | 3373844      | c            | 3516412      | ns                         | c                                    | clone D                    | ++                         | c                 | c   | c   | c       | c     |          |          |      |    | c      | c     |         |      |       |      |       | t      |          |         |          |          |           |           |         |
| t            | 3373868      | g            | 3516436      | s                          | g                                    | clone D                    | ++                         | g                 | g   | g   | g       | g     |          |          |      |    | t      | g     |         |      |       |      |       | t      |          |         |          |          |           |           |         |
| g            | 3373871      | a            | 3516439      | s                          | a                                    | clone D                    | ++                         | a                 | a   | a   | a       | a     |          |          |      |    | g      | a     |         |      |       |      |       | g      |          |         |          |          |           |           |         |
| c            | 3373898      | t            | 3516466      | s                          | c                                    | CFT073                     | ++                         | c                 | c   | c   | c       | c     |          |          |      |    | c      | c     |         |      |       |      |       | c      |          |         |          |          |           |           |         |
| c            | 3373904      | t            | 3516472      | s                          | t                                    | clone D                    | ++                         | t                 | t   | t   | t       | t     |          |          |      |    | t      | t     |         |      |       |      |       | c      |          |         |          |          |           |           |         |
| a            | 3373907      | g            | 3516475      | s                          | g                                    | clone D                    | ++                         | g                 | g   | g   | g       | g     |          |          |      |    | g      | g     |         |      |       |      |       | a      |          |         |          |          |           |           |         |
| g            | 3373916      | c            | 3516484      | s                          | g                                    | CFT073                     | ++                         | g                 | g   | g   | g       | g     |          |          |      |    | g      | c     |         |      |       |      |       | g      |          |         |          |          |           |           |         |
| c            | 3373958      | t            | 3516526      | s                          | t                                    | clone D                    | ++                         | t                 | t   | c   | c       | c     |          |          |      |    | t      | t     |         |      |       |      |       | c      |          |         |          |          |           |           |         |
| g            | 3374021      | a            | 3516589      | s                          | g                                    | CFT073                     | ++                         | g                 | g   | a   | a       | a     |          |          |      |    | a      | a     |         |      |       |      |       | g      |          |         |          |          |           |           |         |
| g            | 3374030      | a            | 3516598      | s                          | a                                    | clone D                    | ++                         | a                 | a   | a   | a       | a     |          |          |      |    | -      | a     |         |      |       |      |       | g      |          |         |          |          |           |           |         |
| a            | 3374049      | c            | 3516617      | s                          | c                                    | clone D                    | ++                         | c                 | c   | c   | c       | c     |          |          |      |    | c      | c     |         |      |       |      |       | a      |          |         |          |          |           |           |         |
| g            | 3374054      | a            | 3516622      | s                          | g                                    | CFT073                     | ++                         | g                 | g   | g   | g       | g     |          |          |      |    | a      | g     |         |      |       |      |       | g      |          |         |          |          |           |           |         |
| c            | 3374075      | t            | 3516643      | s                          | c                                    | CFT073                     | ++                         | c                 | c   | c   | c       | c     |          |          |      |    | t      | c     |         |      |       |      |       | c      |          |         |          |          |           |           |         |
| a            | 3374081      | g            | 3516649      | s                          | a                                    | CFT073                     | ++                         | a                 | a   | a   | a       | a     |          |          |      |    | a      | a     |         |      |       |      |       | a      |          |         |          |          |           |           |         |
| g            | 3374088      | a            | 3516656      | ns                         | g                                    | CFT073                     | ++                         | g                 | g   | g   | g       | g     |          |          |      |    | g      | g     |         |      |       |      |       | g      |          |         |          |          |           |           |         |
| t            | 3374149      | g            | 3516717      | ns                         | t                                    | CFT073                     | ++                         | t                 | t   | t   | t       | t     |          |          |      |    | t      | t     |         |      |       |      |       | t      |          |         |          |          |           |           |         |
| g            | 3374239      | a            | 3516807      | s                          | g                                    | CFT073                     | ++                         | g                 | g   | g   | g       | g     |          |          |      |    | g      | g     |         |      |       |      |       | g      |          |         |          |          |           |           |         |
| a            | 3374272      | g            | 3516840      | s                          | g                                    | clone D                    | ++                         | g                 | g   | g   | g       | g     |          |          |      |    | g      | g     |         |      |       |      |       | a      |          |         |          |          |           |           |         |
| g            | 3374276      | a            | 3516844      | ns                         | g                                    | CFT073                     | ++                         | g                 | g   | g   | g       | g     |          |          |      |    | a      | g     |         |      |       |      |       | g      |          |         |          |          |           |           |         |
| a            | 3374278      | c            | 3516846      | ns                         | a                                    | CFT073                     | ++                         | a                 | a   | a   | a       | a     |          |          |      |    | c      | a     |         |      |       |      |       | a      |          |         |          |          |           |           |         |
| t            | 3374281      | c            | 3516849      | s                          | t                                    | CFT073                     | ++                         | t                 | t   | t   | t       | t     |          |          |      |    | c      | t     |         |      |       |      |       | t      |          |         |          |          |           |           |         |

| Clone D base | Clone D site | CFT 073 base | CFT 073 site | mutation type <sup>a</sup> | Inferred ancestral base <sup>b</sup> | lineage inferred to mutate | Support level <sup>c</sup> | ED1a <sup>d</sup> | 536 | S88 | APEC O1 | UT189 | E2348/69 | ATCC8739 | K-12 | HS | SMS3-5 | IAI39 | E24377A | SE11 | 55989 | IAI1 | Sakai | UMN026 | B4 Sb227 | F5 8401 | SS Ss046 | D1 Sd197 | B18 BS512 | F2a 2457T | F2a 301 |
|--------------|--------------|--------------|--------------|----------------------------|--------------------------------------|----------------------------|----------------------------|-------------------|-----|-----|---------|-------|----------|----------|------|----|--------|-------|---------|------|-------|------|-------|--------|----------|---------|----------|----------|-----------|-----------|---------|
| t            | 3374444      | g            | 3517012      | ns                         | g                                    | clone D                    | ++                         | g                 | g   | g   | g       | g     |          |          |      |    | g      | g     |         |      |       |      |       | t      |          |         |          |          |           |           |         |
| a            | 3374473      | g            | 3517041      | s                          | a                                    | CFT073                     | ++                         | a                 | a   | g   | g       | g     |          |          |      |    | a      | a     |         |      |       |      |       | a      |          |         |          |          |           |           |         |
| a            | 3374476      | g            | 3517044      | s                          | a                                    | CFT073                     | ++                         | a                 | a   | g   | g       | g     |          |          |      |    | a      | a     |         |      |       |      |       | a      |          |         |          |          |           |           |         |
| a            | 3374494      | g            | 3517062      | s                          | g                                    | clone D                    | ++                         | g                 | g   | g   | g       | g     |          |          |      |    | g      | g     |         |      |       |      |       | g      |          |         |          |          |           |           |         |
| a            | 3374510      | g            | 3517078      | ns                         | a                                    | CFT073                     | ++                         | a                 | a   | a   | a       | a     |          |          |      |    | a      | a     |         |      |       |      |       | a      |          |         |          |          |           |           |         |
| a            | 3374512      | g            | 3517080      | ns                         | a                                    | CFT073                     | ++                         | a                 | a   | a   | a       | a     |          |          |      |    | a      | a     |         |      |       |      |       | a      |          |         |          |          |           |           |         |
| t            | 3374515      | a            | 3517083      | s                          | ?                                    | ?                          | +/-                        | -                 | -   | -   | -       | -     |          |          |      |    | -      | -     |         |      |       |      |       | -      |          |         |          |          |           |           |         |
| c            | 3374516      | t            | 3517084      | s                          | ?                                    | ?                          | +/-                        | -                 | -   | -   | -       | -     |          |          |      |    | -      | -     |         |      |       |      |       | -      |          |         |          |          |           |           |         |
| a            | 3374519      | g            | 3517087      | ns                         | ?                                    | ?                          | +/-                        | t                 | t   | t   | t       | t     |          |          |      |    | t      | t     |         |      |       |      |       | t      |          |         |          |          |           |           |         |
| t            | 3374520      | c            | 3517088      | ns                         | c                                    | clone D                    | ++                         | c                 | c   | c   | c       | c     |          |          |      |    | c      | c     |         |      |       |      |       | c      |          |         |          |          |           |           |         |
| a            | 3374521      | t            | 3517089      | ns                         | t                                    | clone D                    | ++                         | t                 | t   | t   | t       | t     |          |          |      |    | t      | t     |         |      |       |      |       | t      |          |         |          |          |           |           |         |
| a            | 3374522      | g            | 3517090      | ns                         | g                                    | clone D                    | ++                         | g                 | g   | g   | g       | g     |          |          |      |    | g      | g     |         |      |       |      |       | g      |          |         |          |          |           |           |         |
| g            | 3374523      | a            | 3517091      | ns                         | a                                    | clone D                    | ++                         | a                 | a   | a   | a       | a     |          |          |      |    | a      | a     |         |      |       |      |       | a      |          |         |          |          |           |           |         |
| c            | 3374524      | t            | 3517092      | ns                         | t                                    | clone D                    | ++                         | t                 | t   | t   | t       | t     |          |          |      |    | t      | t     |         |      |       |      |       | t      |          |         |          |          |           |           |         |
| a            | 3374584      | g            | 3517152      | s                          | a                                    | CFT073                     | ++                         | a                 | a   | g   | g       | g     |          |          |      |    | a      | a     |         |      |       |      |       | a      |          |         |          |          |           |           |         |
| g            | 3374590      | a            | 3517158      | s                          | g                                    | CFT073                     | ++                         | g                 | g   | g   | g       | g     |          |          |      |    | g      | g     |         |      |       |      |       | g      |          |         |          |          |           |           |         |
| t            | 3374615      | g            | 3517183      | ns                         | g                                    | clone D                    | ++                         | g                 | t   | a   | a       | a     |          |          |      |    | t      | g     |         |      |       |      |       | t      |          |         |          |          |           |           |         |
| t            | 3374653      | c            | 3517221      | s                          | t                                    | CFT073                     | ++                         | t                 | t   | t   | t       | t     |          |          |      |    | t      | t     |         |      |       |      |       | t      |          |         |          |          |           |           |         |
| a            | 3374659      | c            | 3517227      | s                          | a                                    | CFT073                     | ++                         | a                 | a   | a   | a       | a     |          |          |      |    | a      | a     |         |      |       |      |       | a      |          |         |          |          |           |           |         |
| c            | 3374710      | t            | 3517278      | s                          | c                                    | CFT073                     | ++                         | c                 | t   | c   | c       | c     |          |          |      |    | c      | c     |         |      |       |      |       | c      |          |         |          |          |           |           |         |
| c            | 3374718      | a            | 3517286      | ns                         | c                                    | CFT073                     | ++                         | c                 | c   | c   | c       | c     |          |          |      |    | c      | c     |         |      |       |      |       | c      |          |         |          |          |           |           |         |
| c            | 3374794      | t            | 3517362      | s                          | t                                    | clone D                    | ++                         | t                 | t   | c   | c       | c     |          |          |      |    | c      | t     |         |      |       |      |       | c      |          |         |          |          |           |           |         |
| c            | 3374796      | a            | 3517364      | ns                         | a                                    | clone D                    | ++                         | a                 | a   | a   | a       | a     |          |          |      |    | a      | a     |         |      |       |      |       | c      |          |         |          |          |           |           |         |
| c            | 3374803      | t            | 3517371      | s                          | t                                    | clone D                    | ++                         | t                 | c   | c   | c       | c     |          |          |      |    | c      | t     |         |      |       |      |       | c      |          |         |          |          |           |           |         |
| a            | 3374824      | g            | 3517392      | s                          | g                                    | clone D                    | ++                         | g                 | g   | a   | a       | a     |          |          |      |    | a      | g     |         |      |       |      |       | a      |          |         |          |          |           |           |         |
| g            | 3374854      | a            | 3517422      | s                          | a                                    | clone D                    | ++                         | a                 | g   | g   | g       | g     |          |          |      |    | g      | a     |         |      |       |      |       | g      |          |         |          |          |           |           |         |
| c            | 3374887      | a            | 3517455      | s                          | c                                    | CFT073                     | ++                         | c                 | a   | c   | c       | c     |          |          |      |    | c      | c     |         |      |       |      |       | c      |          |         |          |          |           |           |         |
| g            | 3374893      | a            | 3517461      | s                          | a                                    | clone D                    | ++                         | a                 | a   | a   | a       | a     |          |          |      |    | g      | g     |         |      |       |      |       | g      |          |         |          |          |           |           |         |



| Clone D base | Clone D site | CFT 073 base | CFT 073 site | mutation type <sup>a</sup> | Inferred ancestral base <sup>b</sup> | lineage inferred to mutate | Support level <sup>c</sup> | ED1a <sup>d</sup> | 536 | S88 | APEC O1 | UT189 | E2348/69 | ATCC8739 | K-12 | HS | SMS3-5 | IAI39 | E24377A | SE11 | 55989 | IAI1 | Sakai | UMN026 | B4 Sb227 | F5 8401 | SS Ss046 | D1 Sd197 | B18 BS512 | F2a 2457T | F2a 301 |
|--------------|--------------|--------------|--------------|----------------------------|--------------------------------------|----------------------------|----------------------------|-------------------|-----|-----|---------|-------|----------|----------|------|----|--------|-------|---------|------|-------|------|-------|--------|----------|---------|----------|----------|-----------|-----------|---------|
| g            | 3375235      | a            | 3517803      | s                          | g                                    | CFT073                     | ++                         | g                 | g   | g   | g       | g     |          |          |      |    | g      | g     |         |      |       |      |       | g      |          |         |          |          |           |           |         |
| t            | 3375243      | a            | 3517811      | ns                         | t                                    | CFT073                     | ++                         | t                 | t   | t   | t       | t     |          |          |      |    | t      | t     |         |      |       |      |       | t      |          |         |          |          |           |           |         |
| t            | 3375250      | c            | 3517818      | s                          | t                                    | CFT073                     | ++                         | t                 | t   | t   | t       | t     |          |          |      |    | t      | t     |         |      |       |      |       | t      |          |         |          |          |           |           |         |
| c            | 3375253      | t            | 3517821      | s                          | c                                    | CFT073                     | ++                         | c                 | c   | c   | c       | c     |          |          |      |    | c      | c     |         |      |       |      |       | c      |          |         |          |          |           |           |         |
| g            | 3375267      | c            | 3517835      | ns                         | g                                    | CFT073                     | ++                         | g                 | g   | g   | g       | g     |          |          |      |    | g      | g     |         |      |       |      |       | g      |          |         |          |          |           |           |         |
| c            | 3375268      | g            | 3517836      | ns                         | c                                    | CFT073                     | ++                         | c                 | c   | c   | c       | c     |          |          |      |    | c      | c     |         |      |       |      |       | c      |          |         |          |          |           |           |         |
| c            | 3375271      | t            | 3517839      | s                          | c                                    | CFT073                     | ++                         | c                 | c   | c   | c       | c     |          |          |      |    | c      | c     |         |      |       |      |       | c      |          |         |          |          |           |           |         |
| g            | 3375309      | t            | 3517877      | ns                         | g                                    | CFT073                     | ++                         | g                 | g   | g   | g       | g     |          |          |      |    | g      | g     |         |      |       |      |       | g      |          |         |          |          |           |           |         |
| g            | 3375322      | a            | 3517890      | s                          | g                                    | CFT073                     | ++                         | g                 | g   | g   | g       | g     |          |          |      |    | g      | g     |         |      |       |      |       | g      |          |         |          |          |           |           |         |
| g            | 3375324      | a            | 3517892      | ns                         | g                                    | CFT073                     | ++                         | g                 | g   | g   | g       | g     |          |          |      |    | g      | g     |         |      |       |      |       | g      |          |         |          |          |           |           |         |
| a            | 3375364      | g            | 3517932      | s                          | g                                    | clone D                    | ++                         | g                 | g   | g   | g       | g     |          |          |      |    | g      | g     |         |      |       |      |       | a      |          |         |          |          |           |           |         |
| c            | 3375412      | a            | 3517980      | s                          | ?                                    | ?                          | +/-                        | c                 | c   | a   | a       | a     |          |          |      |    | g      | g     |         |      |       |      |       | c      |          |         |          |          |           |           |         |
| g            | 3375466      | c            | 3518034      | s                          | g                                    | CFT073                     | ++                         | g                 | g   | g   | g       | g     |          |          |      |    | g      | g     |         |      |       |      |       | g      |          |         |          |          |           |           |         |
| a            | 3375490      | g            | 3518058      | s                          | g                                    | clone D                    | ++                         | g                 | a   | g   | g       | g     |          |          |      |    | g      | g     |         |      |       |      |       | a      |          |         |          |          |           |           |         |
| c            | 3375708      | a            | 3518276      | ns                         | a                                    | clone D                    | ++                         | a                 |     | a   | a       | a     |          |          |      |    | a      | a     |         |      |       |      |       | a      |          |         |          |          |           |           |         |
| t            | 3375841      | c            | 3518409      | s                          | c                                    | clone D                    | ++                         | c                 |     | t   | t       | t     |          |          |      |    | t      | t     |         |      |       |      |       | t      |          |         |          |          |           |           |         |
| c            | 3375970      | t            | 3518538      | s                          | t                                    | clone D                    | ++                         | t                 |     | t   | t       | t     |          |          |      |    | c      | c     |         |      |       |      |       | t      |          |         |          |          |           |           |         |
| t            | 3375979      | c            | 3518547      | s                          | c                                    | clone D                    | ++                         | c                 |     | t   | t       | t     |          |          |      |    | t      | t     |         |      |       |      |       | c      |          |         |          |          |           |           |         |
| a            | 3375987      | g            | 3518555      | ns                         | g                                    | clone D                    | ++                         | g                 |     | g   | g       | g     |          |          |      |    | g      | g     |         |      |       |      |       | g      |          |         |          |          |           |           |         |
| a            | 3375988      | c            | 3518556      | ns                         | c                                    | clone D                    | ++                         | c                 |     | a   | a       | a     |          |          |      |    | a      | a     |         |      |       |      |       | c      |          |         |          |          |           |           |         |
| a            | 3375990      | g            | 3518558      | ns                         | g                                    | clone D                    | ++                         | g                 |     | a   | a       | a     |          |          |      |    | a      | a     |         |      |       |      |       | g      |          |         |          |          |           |           |         |
| t            | 3376006      | c            | 3518574      | s                          | c                                    | clone D                    | ++                         | c                 |     | t   | t       | t     |          |          |      |    | t      | t     |         |      |       |      |       | c      |          |         |          |          |           |           |         |
| t            | 3376033      | c            | 3518601      | s                          | c                                    | clone D                    | ++                         | c                 |     | t   | t       | t     |          |          |      |    | t      | t     |         |      |       |      |       | c      |          |         |          |          |           |           |         |
| c            | 3376039      | a            | 3518607      | s                          | a                                    | clone D                    | ++                         | a                 |     | c   | c       | c     |          |          |      |    | c      | c     |         |      |       |      |       | a      |          |         |          |          |           |           |         |
| c            | 3376045      | t            | 3518613      | s                          | t                                    | clone D                    | ++                         | t                 |     | c   | c       | c     |          |          |      |    | c      | c     |         |      |       |      |       | t      |          |         |          |          |           |           |         |
| t            | 3376056      | g            | 3518624      | ns                         | g                                    | clone D                    | ++                         | g                 |     | g   | g       | g     |          |          |      |    | g      | g     |         |      |       |      |       | g      |          |         |          |          |           |           |         |
| a            | 3376063      | g            | 3518631      | s                          | g                                    | clone D                    | ++                         | g                 |     | a   | a       | a     |          |          |      |    | a      | a     |         |      |       |      |       | g      |          |         |          |          |           |           |         |
| a            | 3376078      | g            | 3518646      | s                          | g                                    | clone D                    | ++                         | g                 |     | a   | a       | a     |          |          |      |    | a      | a     |         |      |       |      |       | g      |          |         |          |          |           |           |         |

| Clone D base | Clone D site | CFT 073 base | CFT 073 site | mutation type <sup>a</sup> | Inferred ancestral base <sup>b</sup> | lineage inferred to mutate | Support level <sup>c</sup> | ED1a <sup>d</sup> | 536 | S88 | APEC O1 | UT189 | E2348/69 | ATCC8739 | K-12 | HS | SMS3-5 | IAI39 | E24377A | SE11 | 55989 | IAI1 | Sakai | UMN026 | B4 Sb227 | F5 8401 | SS Ss046 | D1 Sd197 | B18 BS512 | F2a 2457T | F2a 301 |
|--------------|--------------|--------------|--------------|----------------------------|--------------------------------------|----------------------------|----------------------------|-------------------|-----|-----|---------|-------|----------|----------|------|----|--------|-------|---------|------|-------|------|-------|--------|----------|---------|----------|----------|-----------|-----------|---------|
| g            | 3376081      | a            | 3518649      | s                          | a                                    | clone D                    | ++                         | a                 | g   | g   | g       |       |          |          |      |    | a      | g     |         |      |       |      |       | a      |          |         |          |          |           |           |         |
| g            | 3376084      | t            | 3518652      | s                          | t                                    | clone D                    | ++                         | t                 | g   | g   | g       |       |          |          |      |    | t      | g     |         |      |       |      |       | t      |          |         |          |          |           |           |         |
| g            | 3376096      | a            | 3518664      | s                          | a                                    | clone D                    | ++                         | a                 | g   | g   | g       |       |          |          |      |    | a      | g     |         |      |       |      |       | a      |          |         |          |          |           |           |         |
| c            | 3376111      | t            | 3518679      | s                          | t                                    | clone D                    | ++                         | t                 | c   | c   | c       |       |          |          |      |    | c      | c     |         |      |       |      |       | t      |          |         |          |          |           |           |         |
| a            | 3376144      | g            | 3518712      | s                          | g                                    | clone D                    | ++                         | g                 | g   | g   | g       |       |          |          |      |    | -      | g     |         |      |       |      |       | g      |          |         |          |          |           |           |         |
| a            | 3376147      | g            | 3518715      | s                          | g                                    | clone D                    | ++                         | g                 | a   | a   | a       |       |          |          |      |    | g      | a     |         |      |       |      |       | g      |          |         |          |          |           |           |         |
| c            | 3376211      | t            | 3518779      | nc                         | t                                    | clone D                    | ++                         | t                 | t   | t   | t       |       |          |          |      |    | t      | t     |         |      |       |      |       | t      |          |         |          |          |           |           |         |
| a            | 3376228      | g            | 3518796      | nc                         | g                                    | clone D                    | ++                         | g                 | a   | a   | a       |       |          |          |      |    | a      | a     |         |      |       |      |       | a      |          |         |          |          |           |           |         |
| t            | 3376244      | c            | 3518812      | s                          | c                                    | clone D                    | ++                         | c                 | t   | t   | t       |       |          |          |      |    | t      | t     |         |      |       |      |       | t      |          |         |          |          |           |           |         |
| t            | 3376247      | c            | 3518815      | s                          | c                                    | clone D                    | ++                         | c                 | t   | t   | t       |       |          |          |      |    | t      | t     |         |      |       |      |       | t      |          |         |          |          |           |           |         |
| g            | 3376257      | a            | 3518825      | ns                         | a                                    | clone D                    | ++                         | a                 | g   | g   | g       |       |          |          |      |    | g      | g     |         |      |       |      |       | g      |          |         |          |          |           |           |         |
| c            | 3376268      | g            | 3518836      | s                          | g                                    | clone D                    | ++                         | g                 | c   | c   | c       |       |          |          |      |    | c      | c     |         |      |       |      |       | c      |          |         |          |          |           |           |         |
| g            | 3376295      | a            | 3518863      | s                          | a                                    | clone D                    | ++                         | a                 | g   | g   | g       |       |          |          |      |    | g      | g     |         |      |       |      |       | g      |          |         |          |          |           |           |         |
| a            | 3376298      | g            | 3518866      | s                          | g                                    | clone D                    | ++                         | g                 | g   | g   | g       |       |          |          |      |    | a      | g     |         |      |       |      |       | g      |          |         |          |          |           |           |         |
| c            | 3376307      | t            | 3518875      | s                          | t                                    | clone D                    | ++                         | t                 | t   | t   | t       |       |          |          |      |    | t      | t     |         |      |       |      |       | t      |          |         |          |          |           |           |         |
| g            | 3376315      | a            | 3518883      | ns                         | a                                    | clone D                    | ++                         | a                 | a   | a   | a       |       |          |          |      |    | a      | a     |         |      |       |      |       | a      |          |         |          |          |           |           |         |
| t            | 3376319      | c            | 3518887      | s                          | c                                    | clone D                    | ++                         | c                 | c   | c   | c       |       |          |          |      |    | c      | c     |         |      |       |      |       | t      |          |         |          |          |           |           |         |
| t            | 3376322      | c            | 3518890      | s                          | t                                    | CFT073                     | ++                         | t                 | c   | c   | c       |       |          |          |      |    | c      | c     |         |      |       |      |       | c      |          |         |          |          |           |           |         |
| g            | 3376328      | a            | 3518896      | s                          | a                                    | clone D                    | ++                         | a                 | a   | a   | a       |       |          |          |      |    | a      | a     |         |      |       |      |       | a      |          |         |          |          |           |           |         |
| c            | 3376332      | t            | 3518900      | s                          | t                                    | clone D                    | ++                         | t                 | t   | t   | t       |       |          |          |      |    | t      | t     |         |      |       |      |       | t      |          |         |          |          |           |           |         |
| t            | 3376346      | c            | 3518914      | s                          | c                                    | clone D                    | ++                         | c                 | c   | c   | c       |       |          |          |      |    | c      | a     |         |      |       |      |       | a      |          |         |          |          |           |           |         |
| a            | 3376367      | c            | 3518935      | s                          | a                                    | CFT073                     | ++                         | a                 | a   | a   | a       |       |          |          |      |    | c      | a     |         |      |       |      |       | a      |          |         |          |          |           |           |         |
| t            | 3376376      | c            | 3518944      | s                          | t                                    | CFT073                     | ++                         | t                 | t   | t   | t       |       |          |          |      |    | t      | t     |         |      |       |      |       | t      |          |         |          |          |           |           |         |
| a            | 3376412      | g            | 3518980      | s                          | g                                    | clone D                    | ++                         | g                 | g   | g   | g       |       |          |          |      |    | g      | g     |         |      |       |      |       | g      |          |         |          |          |           |           |         |
| g            | 3376424      | a            | 3518992      | s                          | a                                    | clone D                    | ++                         | a                 | a   | a   | a       |       |          |          |      |    | a      | a     |         |      |       |      |       | a      |          |         |          |          |           |           |         |
| a            | 3376427      | g            | 3518995      | s                          | g                                    | clone D                    | ++                         | g                 | g   | g   | g       |       |          |          |      |    | g      | g     |         |      |       |      |       | g      |          |         |          |          |           |           |         |
| a            | 3376456      | c            | 3519024      | ns                         | a                                    | CFT073                     | ++                         | a                 | a   | a   | a       |       |          |          |      |    | a      | a     |         |      |       |      |       | a      |          |         |          |          |           |           |         |
| c            | 3376481      | t            | 3519049      | s                          | t                                    | clone D                    | ++                         | t                 | t   | t   | t       |       |          |          |      |    | t      | t     |         |      |       |      |       | t      |          |         |          |          |           |           |         |

| Clone D base | Clone D site | CFT 073 base | CFT 073 site | mutation type <sup>a</sup> | Inferred ancestral base <sup>b</sup> | lineage inferred to mutate | Support level <sup>c</sup> | ED1a <sup>d</sup> | 536 | S88 | APEC O1 | UT189 | E2348/69 | ATCC8739 | K-12 | HS | SMS3-5 | IAI39 | E24377A | SE11 | 55989 | IAI1 | Sakai | UMN026 | B4 Sb227 | F5 8401 | SS Ss046 | D1 Sd197 | B18 BS512 | F2a 2457T | F2a 301 |
|--------------|--------------|--------------|--------------|----------------------------|--------------------------------------|----------------------------|----------------------------|-------------------|-----|-----|---------|-------|----------|----------|------|----|--------|-------|---------|------|-------|------|-------|--------|----------|---------|----------|----------|-----------|-----------|---------|
| a            | 3376484      | c            | 3519052      | s                          | c                                    | clone D                    | ++                         | c                 | c   | c   | c       |       |          |          |      |    | c      | c     |         |      |       |      |       | c      |          |         |          |          |           |           |         |
| c            | 3376499      | t            | 3519067      | s                          | t                                    | clone D                    | ++                         | t                 | t   | t   | t       |       |          |          |      |    | t      | t     |         |      |       |      |       | t      |          |         |          |          |           |           |         |
| t            | 3376517      | c            | 3519085      | s                          | t                                    | CFT073                     | ++                         | t                 | c   | c   | c       |       |          |          |      |    | c      | c     |         |      |       |      |       | c      |          |         |          |          |           |           |         |
| c            | 3376559      | t            | 3519127      | s                          | t                                    | clone D                    | ++                         | t                 | t   | t   | t       |       |          |          |      |    | t      | t     |         |      |       |      |       | t      |          |         |          |          |           |           |         |
| a            | 3376571      | g            | 3519139      | s                          | g                                    | clone D                    | ++                         | g                 | g   | g   | g       |       |          |          |      |    | g      | a     |         |      |       |      |       | g      |          |         |          |          |           |           |         |
| t            | 3376598      | a            | 3519166      | s                          | t                                    | CFT073                     | ++                         | t                 | t   | t   | t       |       |          |          |      |    | t      | t     |         |      |       |      |       | t      |          |         |          |          |           |           |         |
| a            | 3376631      | c            | 3519199      | s                          | a                                    | CFT073                     | ++                         | a                 | a   | a   | a       |       |          |          |      |    | a      | a     |         |      |       |      |       | a      |          |         |          |          |           |           |         |
| a            | 3376667      | g            | 3519235      | s                          | a                                    | CFT073                     | ++                         | a                 | a   | a   | a       |       |          |          |      |    | a      | a     |         |      |       |      |       | a      |          |         |          |          |           |           |         |
| a            | 3376680      | g            | 3519248      | ns                         | g                                    | clone D                    | ++                         | g                 | a   | a   | a       |       |          |          |      |    | a      | g     |         |      |       |      |       | g      |          |         |          |          |           |           |         |
| t            | 3376721      | c            | 3519289      | s                          | c                                    | clone D                    | ++                         | c                 | t   | t   | t       |       |          |          |      |    | t      | t     |         |      |       |      |       | t      |          |         |          |          |           |           |         |
| a            | 3376724      | t            | 3519292      | s                          | t                                    | clone D                    | ++                         | t                 | a   | a   | a       |       |          |          |      |    | a      | a     |         |      |       |      |       | a      |          |         |          |          |           |           |         |
| t            | 3376733      | g            | 3519301      | s                          | g                                    | clone D                    | ++                         | g                 | g   | g   | g       |       |          |          |      |    | g      | g     |         |      |       |      |       | g      |          |         |          |          |           |           |         |
| t            | 3376775      | c            | 3519343      | s                          | c                                    | clone D                    | ++                         | c                 | c   | c   | c       |       |          |          |      |    | c      | c     |         |      |       |      |       | c      |          |         |          |          |           |           |         |
| a            | 3376838      | g            | 3519406      | s                          | g                                    | clone D                    | ++                         | g                 | a   | a   | a       |       |          |          |      |    | g      | a     |         |      |       |      |       | a      |          |         |          |          |           |           |         |
| t            | 3376874      | c            | 3519442      | s                          | t                                    | CFT073                     | ++                         | t                 | t   | t   | t       |       |          |          |      |    | t      | t     |         |      |       |      |       | t      |          |         |          |          |           |           |         |
| a            | 3376883      | g            | 3519451      | s                          | g                                    | clone D                    | ++                         | g                 | a   | a   | a       |       |          |          |      |    | g      | g     |         |      |       |      |       | a      |          |         |          |          |           |           |         |
| c            | 3376898      | t            | 3519466      | s                          | t                                    | clone D                    | ++                         | t                 | c   | c   | c       |       |          |          |      |    | t      | c     |         |      |       |      |       | t      |          |         |          |          |           |           |         |
| a            | 3376901      | g            | 3519469      | s                          | g                                    | clone D                    | ++                         | g                 | g   | g   | g       |       |          |          |      |    | g      | g     |         |      |       |      |       | g      |          |         |          |          |           |           |         |
| c            | 3376907      | t            | 3519475      | s                          | t                                    | clone D                    | ++                         | t                 | c   | c   | c       |       |          |          |      |    | t      | c     |         |      |       |      |       | c      |          |         |          |          |           |           |         |
| t            | 3376925      | c            | 3519493      | s                          | c                                    | clone D                    | ++                         | c                 | c   | c   | c       |       |          |          |      |    | c      | c     |         |      |       |      |       | c      |          |         |          |          |           |           |         |
| c            | 3376967      | t            | 3519535      | s                          | c                                    | CFT073                     | ++                         | c                 | c   | c   | c       |       |          |          |      |    | c      | c     |         |      |       |      |       | c      |          |         |          |          |           |           |         |
| g            | 3376969      | a            | 3519537      | ns                         | a                                    | clone D                    | ++                         | a                 | a   | a   | a       |       |          |          |      |    | a      | a     |         |      |       |      |       | a      |          |         |          |          |           |           |         |
| g            | 3377018      | a            | 3519586      | s                          | g                                    | CFT073                     | ++                         | g                 | a   | a   | a       |       |          |          |      |    | g      | a     |         |      |       |      |       | a      |          |         |          |          |           |           |         |
| a            | 3377102      | g            | 3519670      | s                          | g                                    | clone D                    | ++                         | g                 | g   | g   | g       |       |          |          |      |    | g      | g     |         |      |       |      |       | g      |          |         |          |          |           |           |         |
| g            | 3377105      | a            | 3519673      | s                          | a                                    | clone D                    | ++                         | a                 | g   | g   | g       |       |          |          |      |    | g      | g     |         |      |       |      |       | g      |          |         |          |          |           |           |         |
| g            | 3377128      | a            | 3519696      | ns                         | a                                    | clone D                    | ++                         | a                 | g   | g   | g       |       |          |          |      |    | g      | g     |         |      |       |      |       | g      |          |         |          |          |           |           |         |
| a            | 3377136      | g            | 3519704      | ns                         | g                                    | clone D                    | ++                         | g                 | g   | g   | g       |       |          |          |      |    | g      | g     |         |      |       |      |       | g      |          |         |          |          |           |           |         |
| c            | 3377139      | a            | 3519707      | ns                         | a                                    | clone D                    | ++                         | a                 | a   | a   | a       |       |          |          |      |    | a      | a     |         |      |       |      |       | a      |          |         |          |          |           |           |         |







| Clone D base | Clone D site | CFT 073 base | CFT 073 site | mutation type <sup>a</sup> | Inferred ancestral base <sup>b</sup> | lineage inferred to mutate | Support level <sup>c</sup> | ED1a <sup>d</sup> | 536 | S88 | APEC O1 | UT189 | E2348/69 | ATCC8739 | K-12 | HS | SMS3-5 | IAI39 | E24377A | SE11 | 55989 | IAI1 | Sakai | UMN026 | B4 Sb227 | F5 8401 | SS Ss046 | D1 Sd197 | B18 BS512 | F2a 2457T | F2a 301 |
|--------------|--------------|--------------|--------------|----------------------------|--------------------------------------|----------------------------|----------------------------|-------------------|-----|-----|---------|-------|----------|----------|------|----|--------|-------|---------|------|-------|------|-------|--------|----------|---------|----------|----------|-----------|-----------|---------|
| t            | 3386621      | c            | 3528824      | ns                         | c                                    | clone D                    | ++                         | c                 | c   | c   | c       |       |          |          |      |    | c      | c     |         |      |       |      |       | c      |          |         |          |          |           |           |         |
| c            | 3386624      | t            | 3528827      | ns                         | c                                    | CFT073                     | ++                         | c                 | c   | c   | c       |       |          |          |      |    | c      | c     |         |      |       |      |       | c      |          |         |          |          |           |           |         |
| a            | 3386625      | g            | 3528828      | s                          | a                                    | CFT073                     | ++                         | a                 | a   | a   | a       |       |          |          |      |    | a      | a     |         |      |       |      |       | a      |          |         |          |          |           |           |         |
| t            | 3386640      | c            | 3528843      | s                          | t                                    | CFT073                     | ++                         | t                 | t   | t   | t       |       |          |          |      |    | t      | t     |         |      |       |      |       | t      |          |         |          |          |           |           |         |
| a            | 3386642      | g            | 3528845      | s                          | a                                    | CFT073                     | ++                         | a                 | a   | a   | a       |       |          |          |      |    | a      | a     |         |      |       |      |       | a      |          |         |          |          |           |           |         |
| a            | 3386645      | g            | 3528848      | s                          | a                                    | CFT073                     | ++                         | a                 | a   | a   | a       |       |          |          |      |    | a      | a     |         |      |       |      |       | a      |          |         |          |          |           |           |         |
| g            | 3386655      | a            | 3528858      | ns                         | g                                    | CFT073                     | ++                         | g                 | g   | g   | g       |       |          |          |      |    | g      | g     |         |      |       |      |       | a      |          |         |          |          |           |           |         |
| a            | 3386656      | g            | 3528859      | ns                         | a                                    | CFT073                     | ++                         | a                 | a   | a   | a       |       |          |          |      |    | a      | a     |         |      |       |      |       | a      |          |         |          |          |           |           |         |
| g            | 3386657      | c            | 3528860      | ns                         | g                                    | CFT073                     | ++                         | g                 | g   | g   | g       |       |          |          |      |    | g      | g     |         |      |       |      |       | g      |          |         |          |          |           |           |         |
| t            | 3386661      | a            | 3528864      | s                          | a                                    | clone D                    | ++                         | a                 | a   | a   | a       |       |          |          |      |    | a      | a     |         |      |       |      |       | a      |          |         |          |          |           |           |         |
| g            | 3386673      | a            | 3528876      | s                          | a                                    | clone D                    | ++                         | a                 | g   | g   | g       |       |          |          |      |    | g      | g     |         |      |       |      |       | g      |          |         |          |          |           |           |         |
| a            | 3386694      | g            | 3528897      | s                          | g                                    | clone D                    | ++                         | g                 | g   | g   | g       |       |          |          |      |    | g      | g     |         |      |       |      |       | g      |          |         |          |          |           |           |         |
| a            | 3386705      | t            | 3528908      | ns                         | a                                    | CFT073                     | ++                         | a                 | a   | a   | a       |       |          |          |      |    | a      | a     |         |      |       |      |       | a      |          |         |          |          |           |           |         |
| g            | 3386709      | a            | 3528912      | s                          | g                                    | CFT073                     | ++                         | g                 | g   | g   | g       |       |          |          |      |    | g      | g     |         |      |       |      |       | g      |          |         |          |          |           |           |         |
| a            | 3386712      | g            | 3528915      | s                          | a                                    | CFT073                     | ++                         | a                 | a   | a   | a       |       |          |          |      |    | a      | a     |         |      |       |      |       | a      |          |         |          |          |           |           |         |
| g            | 3386718      | a            | 3528921      | s                          | a                                    | clone D                    | ++                         | a                 | g   | g   | g       |       |          |          |      |    | g      | g     |         |      |       |      |       | a      |          |         |          |          |           |           |         |
| a            | 3386723      | g            | 3528926      | s                          | g                                    | clone D                    | ++                         | g                 | a   | a   | a       |       |          |          |      |    | a      | a     |         |      |       |      |       | a      |          |         |          |          |           |           |         |
| t            | 3386724      | a            | 3528927      | s                          | a                                    | clone D                    | ++                         | a                 | a   | a   | a       |       |          |          |      |    | a      | a     |         |      |       |      |       | t      |          |         |          |          |           |           |         |
| c            | 3386735      | a            | 3528938      | ns                         | c                                    | CFT073                     | ++                         | c                 | c   | c   | c       |       |          |          |      |    | c      | c     |         |      |       |      |       | t      |          |         |          |          |           |           |         |
| t            | 3386760      | g            | 3528963      | s                          | g                                    | clone D                    | ++                         | g                 | t   | t   | t       |       |          |          |      |    | t      | t     |         |      |       |      |       | t      |          |         |          |          |           |           |         |
| t            | 3386766      | c            | 3528969      | s                          | c                                    | clone D                    | ++                         | c                 | t   | t   | t       |       |          |          |      |    | t      | t     |         |      |       |      |       | c      |          |         |          |          |           |           |         |
| t            | 3386796      | g            | 3528999      | s                          | t                                    | CFT073                     | ++                         | t                 | c   | t   | t       |       |          |          |      |    | t      | t     |         |      |       |      |       | t      |          |         |          |          |           |           |         |
| a            | 3386810      | g            | 3529013      | s                          | g                                    | clone D                    | ++                         | g                 | a   | g   | g       |       |          |          |      |    | g      | g     |         |      |       |      |       | g      |          |         |          |          |           |           |         |
| g            | 3386832      | a            | 3529035      | ns                         | a                                    | clone D                    | ++                         | a                 | c   | a   | a       |       |          |          |      |    | a      | a     |         |      |       |      |       | a      |          |         |          |          |           |           |         |
| c            | 3386834      | t            | 3529037      | ns                         | c                                    | CFT073                     | ++                         | c                 | c   | c   | c       |       |          |          |      |    | c      | c     |         |      |       |      |       | c      |          |         |          |          |           |           |         |
| a            | 3386844      | t            | 3529047      | ns                         | a                                    | CFT073                     | ++                         | a                 | c   | t   | t       |       |          |          |      |    | t      | t     |         |      |       |      |       | a      |          |         |          |          |           |           |         |
| t            | 3386904      | c            | 3529107      | s                          | t                                    | CFT073                     | ++                         | t                 | g   | c   | c       |       |          |          |      |    | c      | c     |         |      |       |      |       | t      |          |         |          |          |           |           |         |
| a            | 3386993      | g            | 3529196      | s                          | g                                    | clone D                    | ++                         | g                 | a   | a   | a       |       |          |          |      |    | a      | a     |         |      |       |      |       | a      |          |         |          |          |           |           |         |

| Clone D base | Clone D site | CFT 073 base | CFT 073 site | mutation type <sup>a</sup> | Inferred ancestral base <sup>b</sup> | lineage inferred to mutate | Support level <sup>c</sup> | ED1a <sup>d</sup> | 536 | S88 | APEC O1 | UT189 | E2348/69 | ATCC8739 | K-12 | HS | SMS3-5 | IAI39 | E24377A | SE11 | 55989 | IAI1 | Sakai | UMN026 | B4 Sb227 | F5 8401 | SS Ss046 | D1 Sd197 | B18 BS512 | F2a 2457T | F2a 301 |
|--------------|--------------|--------------|--------------|----------------------------|--------------------------------------|----------------------------|----------------------------|-------------------|-----|-----|---------|-------|----------|----------|------|----|--------|-------|---------|------|-------|------|-------|--------|----------|---------|----------|----------|-----------|-----------|---------|
| a            | 3387093      | g            | 3529296      | nc                         | a                                    | CFT073                     | ++                         | a                 | a   | a   | a       | a     |          |          |      |    | a      | a     |         |      |       |      |       | a      |          |         |          |          |           |           |         |
| a            | 3387107      | t            | 3529310      | nc                         | a                                    | CFT073                     | ++                         | a                 | a   | a   | a       | a     |          |          |      |    | a      | a     |         |      |       |      |       | a      |          |         |          |          |           |           |         |
| c            | 3387120      | t            | 3529323      | nc                         | c                                    | CFT073                     | ++                         | c                 | c   | c   | c       | c     |          |          |      |    | c      | c     |         |      |       |      |       | c      |          |         |          |          |           |           |         |
| t            | 3387131      | c            | 3529334      | nc                         | t                                    | CFT073                     | ++                         | t                 | t   | t   | t       | t     |          |          |      |    | t      | t     |         |      |       |      |       | t      |          |         |          |          |           |           |         |
| g            | 3387165      | a            | 3529368      | nc                         | g                                    | CFT073                     | ++                         | g                 | g   | a   | a       | a     |          |          |      |    | g      | a     |         |      |       |      |       | g      |          |         |          |          |           |           |         |
| a            | 3387169      | g            | 3529372      | nc                         | a                                    | CFT073                     | ++                         | a                 | a   | g   | g       | g     |          |          |      |    | a      | g     |         |      |       |      |       | a      |          |         |          |          |           |           |         |
| c            | 3387189      | t            | 3529392      | nc                         | t                                    | clone D                    | ++                         | t                 | t   | t   | t       | t     |          |          |      |    | t      | t     |         |      |       |      |       | t      |          |         |          |          |           |           |         |
| c            | 3387191      | g            | 3529394      | nc                         | c                                    | CFT073                     | ++                         | c                 | c   | c   | c       | c     |          |          |      |    | c      | c     |         |      |       |      |       | c      |          |         |          |          |           |           |         |
| t            | 3387217      | c            | 3529420      | nc                         | c                                    | clone D                    | ++                         | c                 | c   | c   | c       | c     |          |          |      |    | c      | c     |         |      |       |      |       | c      |          |         |          |          |           |           |         |
| a            | 3387225      | c            | 3529427      | nc                         | a                                    | CFT073                     | ++                         | a                 | a   | a   | a       | a     |          |          |      |    | a      | a     |         |      |       |      |       | a      |          |         |          |          |           |           |         |
| g            | 3387309      | t            | 3529511      | nc                         | t                                    | clone D                    | ++                         | t                 | t   | t   | t       | t     |          |          |      |    | t      | t     |         |      |       |      |       | t      |          |         |          |          |           |           |         |
| t            | 3387347      | c            | 3529549      | nc                         | t                                    | CFT073                     | ++                         | t                 | t   | t   | t       | t     |          |          |      |    | t      | t     |         |      |       |      |       | t      |          |         |          |          |           |           |         |
| c            | 3387354      | t            | 3529556      | nc                         | t                                    | clone D                    | ++                         | t                 | t   | c   | c       | c     |          |          |      |    | t      | c     |         |      |       |      |       | c      |          |         |          |          |           |           |         |
| a            | 3387355      | t            | 3529557      | nc                         | a                                    | CFT073                     | ++                         | a                 | a   | a   | a       | a     |          |          |      |    | a      | a     |         |      |       |      |       | a      |          |         |          |          |           |           |         |
| t            | 3387358      | g            | 3529560      | nc                         | g                                    | clone D                    | ++                         | g                 | g   | g   | g       | g     |          |          |      |    | g      | g     |         |      |       |      |       | g      |          |         |          |          |           |           |         |
| t            | 3387383      | c            | 3529701      | nc                         | t                                    | CFT073                     | ++                         | t                 | t   | t   | t       | t     |          |          |      |    | g      | t     |         |      |       |      |       | c      |          |         |          |          |           |           |         |
| t            | 3387385      | c            | 3529703      | nc                         | c                                    | clone D                    | ++                         | c                 | t   | t   | t       | t     |          |          |      |    | -      | t     |         |      |       |      |       | c      |          |         |          |          |           |           |         |
| c            | 3387416      | a            | 3529734      | nc                         | a                                    | clone D                    | ++                         | a                 | a   | c   | c       | c     |          |          |      |    | a      | c     |         |      |       |      |       | c      |          |         |          |          |           |           |         |
| t            | 3387419      | c            | 3529737      | nc                         | t                                    | CFT073                     | ++                         | t                 | t   | t   | t       | t     |          |          |      |    | c      | t     |         |      |       |      |       | t      |          |         |          |          |           |           |         |
| g            | 3387423      | a            | 3529741      | nc                         | a                                    | clone D                    | ++                         | a                 | t   | g   | g       | g     |          |          |      |    | a      | g     |         |      |       |      |       | g      |          |         |          |          |           |           |         |
| a            | 3387436      | g            | 3529754      | nc                         | a                                    | CFT073                     | ++                         | a                 | a   | a   | a       | a     |          |          |      |    | g      | a     |         |      |       |      |       | a      |          |         |          |          |           |           |         |
| c            | 3387437      | t            | 3529755      | nc                         | c                                    | CFT073                     | ++                         | c                 | c   | c   | c       | c     |          |          |      |    | t      | c     |         |      |       |      |       | c      |          |         |          |          |           |           |         |
| t            | 3387440      | c            | 3529758      | nc                         | c                                    | clone D                    | ++                         | c                 | t   | c   | c       | c     |          |          |      |    | c      | c     |         |      |       |      |       | t      |          |         |          |          |           |           |         |
| c            | 3387446      | t            | 3529764      | nc                         | c                                    | CFT073                     | ++                         | c                 | c   | c   | c       | c     |          |          |      |    | c      | c     |         |      |       |      |       | c      |          |         |          |          |           |           |         |
| c            | 3387451      | t            | 3529769      | nc                         | t                                    | clone D                    | ++                         | t                 | t   | t   | t       | t     |          |          |      |    | t      | t     |         |      |       |      |       | t      |          |         |          |          |           |           |         |
| g            | 3387452      | a            | 3529770      | nc                         | g                                    | CFT073                     | ++                         | g                 | g   | g   | g       | g     |          |          |      |    | a      | g     |         |      |       |      |       | g      |          |         |          |          |           |           |         |
| t            | 3387454      | c            | 3529772      | nc                         | c                                    | clone D                    | ++                         | c                 | t   | t   | t       | t     |          |          |      |    | c      | t     |         |      |       |      |       | t      |          |         |          |          |           |           |         |
| c            | 3387470      | t            | 3529788      | nc                         | c                                    | CFT073                     | ++                         | c                 | c   | c   | c       | c     |          |          |      |    | t      | c     |         |      |       |      |       | t      |          |         |          |          |           |           |         |

| Clone D base | Clone D site | CFT 073 base | CFT 073 site | mutation type <sup>a</sup> | Inferred ancestral base <sup>b</sup> | lineage inferred to mutate | Support level <sup>c</sup> | ED1a <sup>d</sup> | 536 | S88 | APEC O1 | UT189 | E2348/69 | ATCC8739 | K-12 | HS | SMS3-5 | IAI39 | E24377A | SE11 | 55989 | IAI1 | Sakai | UMN026 | B4 Sb227 | F5 8401 | SS Ss046 | D1 Sd197 | B18 BS512 | F2a 2457T | F2a 301 |
|--------------|--------------|--------------|--------------|----------------------------|--------------------------------------|----------------------------|----------------------------|-------------------|-----|-----|---------|-------|----------|----------|------|----|--------|-------|---------|------|-------|------|-------|--------|----------|---------|----------|----------|-----------|-----------|---------|
| c            | 3387495      | t            | 3529813      | nc                         | t                                    | clone D                    | ++                         | t                 | c   | c   | c       | c     |          |          |      |    | t      | c     |         |      |       |      |       | t      |          |         |          |          |           |           |         |
| c            | 3387497      | g            | 3529815      | nc                         | g                                    | clone D                    | ++                         | g                 | c   | c   | c       | c     |          |          |      |    | g      | c     |         |      |       |      |       | g      |          |         |          |          |           |           |         |
| a            | 3387498      | c            | 3529816      | nc                         | c                                    | clone D                    | +                          | t                 | t   | c   | c       | c     |          |          |      |    | c      | c     |         |      |       |      |       | c      |          |         |          |          |           |           |         |
| g            | 3387530      | a            | 3529848      | nc                         | a                                    | clone D                    | ++                         | a                 | a   | g   | g       | g     |          |          |      |    | a      | g     |         |      |       |      |       | a      |          |         |          |          |           |           |         |
| c            | 3387556      | a            | 3529874      | nc                         | c                                    | CFT073                     | ++                         | c                 | c   | c   | c       | c     |          |          |      |    | c      | c     |         |      |       |      |       | c      |          |         |          |          |           |           |         |
| c            | 3387569      | t            | 3529887      | nc                         | t                                    | clone D                    | ++                         | t                 | t   | c   | c       | c     |          |          |      |    | t      | c     |         |      |       |      |       | t      |          |         |          |          |           |           |         |
| t            | 3387572      | c            | 3529890      | nc                         | c                                    | clone D                    | ++                         | c                 | c   | t   | t       | t     |          |          |      |    | c      | t     |         |      |       |      |       | c      |          |         |          |          |           |           |         |
| t            | 3387585      | c            | 3529903      | nc                         | c                                    | clone D                    | ++                         | c                 | c   | t   | t       | t     |          |          |      |    | c      | c     |         |      |       |      |       | c      |          |         |          |          |           |           |         |
| t            | 3387598      | c            | 3529916      | nc                         | c                                    | clone D                    | ++                         | c                 | c   | t   | t       | t     |          |          |      |    | c      | t     |         |      |       |      |       | c      |          |         |          |          |           |           |         |
| g            | 3387611      | c            | 3529929      | nc                         | g                                    | CFT073                     | ++                         | g                 | g   | g   | g       | g     |          |          |      |    | g      | g     |         |      |       |      |       | c      |          |         |          |          |           |           |         |
| t            | 3387612      | a            | 3529930      | nc                         | c                                    | clone D                    | ++                         | c                 | c   | t   | t       | t     |          |          |      |    | c      | t     |         |      |       |      |       | a      |          |         |          |          |           |           |         |
| g            | 3387614      | c            | 3529932      | nc                         | c                                    | clone D                    | ++                         | c                 | c   | g   | g       | g     |          |          |      |    | c      | g     |         |      |       |      |       | c      |          |         |          |          |           |           |         |
| c            | 3387617      | t            | 3529935      | nc                         | t                                    | clone D                    | ++                         | t                 | t   | t   | t       | t     |          |          |      |    | t      | t     |         |      |       |      |       | t      |          |         |          |          |           |           |         |
| c            | 3387625      | t            | 3529943      | nc                         | t                                    | clone D                    | ++                         | t                 | t   | c   | c       | c     |          |          |      |    | t      | c     |         |      |       |      |       | t      |          |         |          |          |           |           |         |
| a            | 3387629      | c            | 3529947      | nc                         | t                                    | clone D                    | ++                         | t                 | t   | a   | a       | a     |          |          |      |    | t      | a     |         |      |       |      |       | t      |          |         |          |          |           |           |         |
| a            | 3387630      | g            | 3529948      | nc                         | g                                    | clone D                    | ++                         | g                 | g   | a   | a       | a     |          |          |      |    | a      | a     |         |      |       |      |       | g      |          |         |          |          |           |           |         |
| g            | 3387631      | a            | 3529949      | nc                         | g                                    | CFT073                     | ++                         | g                 | a   | g   | g       | g     |          |          |      |    | g      | g     |         |      |       |      |       | a      |          |         |          |          |           |           |         |
| c            | 3387643      | t            | 3529961      | nc                         | c                                    | CFT073                     | ++                         | c                 | c   | c   | c       | c     |          |          |      |    | c      | c     |         |      |       |      |       | c      |          |         |          |          |           |           |         |
| a            | 3387678      | g            | 3529997      | nc                         | a                                    | CFT073                     | ++                         | a                 | a   | a   | a       | a     |          |          |      |    | g      | a     |         |      |       |      |       | a      |          |         |          |          |           |           |         |
| t            | 3387824      | c            | 3530143      | nc                         | t                                    | CFT073                     | ++                         | t                 | t   | t   | t       | t     |          |          |      |    | t      | t     |         |      |       |      |       | t      |          |         |          |          |           |           |         |
| a            | 3387830      | g            | 3530149      | nc                         | g                                    | clone D                    | ++                         | g                 | g   | g   | g       | g     |          |          |      |    | g      | g     |         |      |       |      |       | g      |          |         |          |          |           |           |         |
| c            | 3387832      | t            | 3530151      | nc                         | c                                    | CFT073                     | ++                         | c                 | c   | c   | c       | c     |          |          |      |    | c      | c     |         |      |       |      |       | c      |          |         |          |          |           |           |         |
| a            | 3387833      | t            | 3530152      | nc                         | t                                    | clone D                    | ++                         | t                 | t   | t   | t       | t     |          |          |      |    | t      | t     |         |      |       |      |       | t      |          |         |          |          |           |           |         |
| a            | 3387854      | t            | 3530173      | nc                         | a                                    | CFT073                     | ++                         | a                 | a   | a   | a       | a     |          |          |      |    | a      | a     |         |      |       |      |       | a      |          |         |          |          |           |           |         |
| a            | 3387876      | g            | 3530195      | nc                         | a                                    | CFT073                     | ++                         | a                 | a   | a   | a       | a     |          |          |      |    | a      | a     |         |      |       |      |       | a      |          |         |          |          |           |           |         |
| t            | 3387945      | a            | 3530264      | nc                         | t                                    | CFT073                     | ++                         | t                 | c   | t   | t       | t     |          |          |      |    | t      | t     |         |      |       |      |       | t      |          |         |          |          |           |           |         |
| t            | 3387957      | g            | 3530276      | nc                         | t                                    | CFT073                     | ++                         | t                 | g   | t   | t       | t     |          |          |      |    | t      | t     |         |      |       |      |       | t      |          |         |          |          |           |           |         |
| c            | 3388019      | t            | 3530338      | nc                         | t                                    | clone D                    | ++                         | t                 | t   | t   | t       | t     |          |          |      |    | t      | t     |         |      |       |      |       | t      |          |         |          |          |           |           |         |

| Clone D base | Clone D site | CFT 073 base | CFT 073 site | mutation type <sup>a</sup> | Inferred ancestral base <sup>b</sup> | lineage inferred to mutate | Support level <sup>c</sup> | ED1a <sup>d</sup> | 536 | S88 | APEC O1 | UT189 | E2348/69 | ATCC8739 | K-12 | HS | SMS3-5 | IAI39 | E24377A | SE11 | 55989 | IAI1 | Sakai | UMN026 | B4 Sb227 | F5 8401 | SS Ss046 | D1 Sd197 | B18 BS512 | F2a 2457T | F2a 301 |
|--------------|--------------|--------------|--------------|----------------------------|--------------------------------------|----------------------------|----------------------------|-------------------|-----|-----|---------|-------|----------|----------|------|----|--------|-------|---------|------|-------|------|-------|--------|----------|---------|----------|----------|-----------|-----------|---------|
| a            | 3388047      | t            | 3530366      | nc                         | t                                    | clone D                    | ++                         | t                 | t   | t   | t       | t     |          |          |      |    | t      | t     |         |      |       |      | t     |        |          |         |          |          |           |           |         |
| g            | 3388061      | a            | 3530380      | nc                         | a                                    | clone D                    | ++                         | a                 | g   | a   | a       | a     |          |          |      |    | a      | a     |         |      |       |      | a     |        |          |         |          |          |           |           |         |
| t            | 3388079      | g            | 3530398      | nc                         | g                                    | clone D                    | ++                         | g                 | g   | g   | g       | g     |          |          |      |    | g      | g     |         |      |       |      | g     |        |          |         |          |          |           |           |         |
| t            | 3388156      | c            | 3530475      | s                          | c                                    | clone D                    | ++                         | c                 | t   | t   | t       | t     | c        |          | t    | t  | t      | t     | t       | t    | t     | t    | t     | t      | t        |         |          | t        | t         |           |         |
| a            | 3388172      | t            | 3530491      | ns                         | t                                    | clone D                    | ++                         | t                 | t   | t   | t       | t     | t        |          | t    | t  | t      | t     | t       | t    | t     | t    | t     | t      | t        |         |          | t        | t         |           |         |
| t            | 3388180      | c            | 3530499      | s                          | c                                    | clone D                    | ++                         | c                 | c   | c   | c       | c     | c        |          | c    | c  | c      | c     | c       | c    | c     | c    | c     | c      | c        | c       |          |          | c         | c         |         |
| t            | 3388189      | a            | 3530508      | s                          | a                                    | clone D                    | ++                         | a                 | a   | a   | a       | a     | a        |          | a    | a  | a      | a     | a       | a    | a     | a    | a     | a      | a        | a       |          |          | a         | a         |         |
| g            | 3388199      | c            | 3530518      | ns                         | g                                    | CFT073                     | ++                         | g                 | g   | g   | g       | g     | c        |          | g    | g  | c      | g     | g       | g    | g     | g    | g     | c      | g        |         |          | g        | g         |           |         |
| a            | 3388201      | c            | 3530520      | s                          | a                                    | CFT073                     | ++                         | a                 | a   | a   | a       | a     | t        |          | a    | a  | t      | a     | a       | a    | a     | a    | a     | t      | a        |         |          | a        | a         |           |         |
| t            | 3388221      | c            | 3530540      | ns                         | t                                    | CFT073                     | ++                         | t                 | t   | t   | t       | t     | t        |          | t    | t  | t      | t     | t       | t    | t     | t    | t     | t      | t        |         |          | t        | t         |           |         |
| a            | 3388234      | g            | 3530553      | s                          | a                                    | CFT073                     | ++                         | a                 | a   | a   | a       | a     | a        |          | a    | a  | a      | a     | a       | a    | a     | a    | a     | a      | a        |         |          | a        | a         |           |         |
| t            | 3388237      | c            | 3530556      | s                          | t                                    | CFT073                     | ++                         | t                 | t   | t   | t       | t     | t        |          | t    | c  | t      | t     | c       | c    | c     | c    | c     | t      | c        |         |          | t        | c         |           |         |
| t            | 3388249      | c            | 3530568      | s                          | t                                    | CFT073                     | ++                         | t                 | t   | t   | t       | t     | c        |          | t    | c  | t      | c     | c       | c    | c     | c    | c     | c      | c        |         |          | t        | c         |           |         |
| g            | 3388252      | c            | 3530571      | ns                         | g                                    | CFT073                     | ++                         | g                 | g   | g   | g       | g     | g        |          | g    | g  | c      | g     | g       | g    | g     | g    | g     | g      | g        |         |          | g        | g         |           |         |
| t            | 3388261      | g            | 3530580      | ns                         | g                                    | clone D                    | ++                         | g                 | g   | t   | t       | t     | g        |          | t    | g  | g      | g     | g       | g    | g     | g    | g     | g      | g        |         |          | t        | g         |           |         |
| a            | 3388267      | c            | 3530586      | s                          | c                                    | clone D                    | ++                         | c                 | c   | a   | a       | a     | c        |          | c    | c  | c      | c     | c       | c    | c     | c    | c     | c      | c        |         |          | c        | c         |           |         |
| t            | 3388324      | a            | 3530643      | s                          | t                                    | CFT073                     | ++                         | t                 | t   | t   | t       | t     | a        |          | t    | t  | a      | t     | t       | t    | t     | t    | t     | t      | t        |         |          | t        | t         |           |         |
| c            | 3388330      | t            | 3530649      | s                          | c                                    | CFT073                     | ++                         | c                 | c   | c   | c       | c     | t        |          | c    | c  | t      | c     | c       | c    | c     | c    | c     | c      | c        |         |          | c        | c         |           |         |
| c            | 3388342      | a            | 3530661      | s                          | c                                    | CFT073                     | +                          | t                 | a   | c   | c       | c     | c        |          | c    | c  | c      | t     | c       | c    | c     | c    | a     | c      |          |         | c        | c        |           |           |         |
| a            | 3388363      | g            | 3530682      | s                          | g                                    | clone D                    | ++                         | g                 | g   | a   | a       | a     | a        |          | a    | a  | a      | g     | a       | a    | a     | a    | a     | a      | a        |         |          | a        | a         |           |         |
| t            | 3388388      | g            | 3530707      | ns                         | g                                    | clone D                    | ++                         | g                 | g   | g   | g       | g     | g        |          | g    | g  | g      | g     | g       | g    | g     | g    | g     | g      | g        |         |          | g        | g         |           |         |
| c            | 3388425      | t            | 3530744      | ns                         | c                                    | CFT073                     | ++                         | c                 | c   | c   | c       | c     | c        |          | c    | c  | c      | c     | c       | c    | c     | c    | c     | c      | t        | c       |          |          | c         | c         |         |
| a            | 3388432      | g            | 3530751      | ns                         | g                                    | clone D                    | ++                         | g                 | g   | g   | g       | g     | g        |          | g    | g  | g      | g     | g       | g    | g     | g    | a     | g      |          |         | g        | g        |           |           |         |
| t            | 3388434      | c            | 3530753      | ns                         | c                                    | clone D                    | ++                         | c                 | c   | c   | c       | c     | c        |          | c    | c  | c      | c     | c       | c    | c     | c    | t     | c      |          |         | c        | c        |           |           |         |
| c            | 3388498      | t            | 3530817      | s                          | t                                    | clone D                    | ++                         | t                 | t   | t   | t       | t     | t        |          | t    | t  | t      | t     | t       | t    | t     | t    | t     | t      | t        |         |          | t        | t         |           |         |
| a            | 3388532      | c            | 3530851      | ns                         | c                                    | clone D                    | ++                         | c                 | c   | c   | c       | c     | c        |          | c    | c  | c      | c     | c       | c    | c     | c    | c     | c      | c        |         |          | c        | c         |           |         |
| a            | 3388539      | t            | 3530858      | ns                         | t                                    | clone D                    | ++                         | t                 | t   | t   | t       | t     | t        |          | t    | t  | t      | t     | t       | t    | t     | t    | t     | t      | t        |         |          | t        | t         |           |         |
| g            | 3388552      | t            | 3530871      | ns                         | t                                    | clone D                    | ++                         | t                 | t   | c   | c       | c     | t        |          | c    | c  | c      | t     | c       | c    | c     | c    | c     | c      | c        |         |          | c        | c         |           |         |

| Clone D base | Clone D site | CFT 073 base | CFT 073 site | mutation type <sup>a</sup> | Inferred ancestral base <sup>b</sup> | lineage inferred to mutate | Support level <sup>c</sup> | ED1a <sup>d</sup> | 536 | S88 | APEC O1 | UT189 | E2348/69 | ATCC8739 | K-12 | HS | SMS3-5 | IAI39 | E24377A | SE11 | 55989 | IAI1 | Sakai | UMN026 | B4 Sb227 | F5 8401 | SS Ss046 | D1 Sd197 | B18 BS512 | F2a 2457T | F2a 301 |
|--------------|--------------|--------------|--------------|----------------------------|--------------------------------------|----------------------------|----------------------------|-------------------|-----|-----|---------|-------|----------|----------|------|----|--------|-------|---------|------|-------|------|-------|--------|----------|---------|----------|----------|-----------|-----------|---------|
| g            | 3388553      | a            | 3530872      | ns                         | a                                    | clone D                    | ++                         | a                 | a   | a   | a       | a     | a        | a        | a    | a  | g      | a     | a       | a    | a     | a    | a     | a      | a        | a       | a        | a        | a         | a         | a       |
| g            | 3388558      | t            | 3530877      | s                          | t                                    | clone D                    | ++                         | t                 | t   | t   | t       | t     | t        | t        | t    | t  | t      | t     | t       | t    | t     | t    | t     | t      | t        | t       | t        | t        | t         | t         | t       |
| c            | 3388585      | a            | 3530904      | s                          | a                                    | clone D                    | ++                         | a                 | a   | a   | a       | a     | a        | a        | a    | a  | a      | a     | a       | a    | a     | a    | a     | c      | a        | c       | a        | c        | a         | c         | a       |
| c            | 3388603      | t            | 3530922      | s                          | t                                    | clone D                    | ++                         | t                 | t   | t   | t       | t     | t        | t        | t    | t  | t      | t     | t       | t    | t     | t    | t     | c      | t        | c       | t        | t        | t         | t         | t       |
| c            | 3388608      | t            | 3530927      | ns                         | t                                    | clone D                    | ++                         | t                 | t   | t   | t       | t     | t        | t        | c    | c  | t      | t     | c       | c    | c     | c    | c     | c      | c        | c       | c        | c        | c         | c         | c       |
| a            | 3388787      | g            | 3531106      | s                          | g                                    | clone D                    | ++                         | g                 | g   | g   | g       | g     | g        | g        | g    | g  | g      | g     | g       | g    | g     | g    | g     | g      | g        | g       | g        | g        | g         | g         | g       |
| g            | 3388820      | a            | 3531139      | s                          | g                                    | CFT073                     | ++                         | g                 | g   | a   | a       | a     | a        | g        | g    | g  | g      | g     | g       | g    | g     | g    | g     | g      | g        | g       | g        | g        | g         | g         | g       |
| t            | 3388876      | a            | 3531195      | ns                         | a                                    | clone D                    | ++                         | a                 | a   | a   | a       | a     | a        | t        | a    | a  | t      | t     | a       | a    | a     | a    | a     | t      | a        | t       | a        | a        | a         | a         | a       |
| g            | 3388908      | a            | 3531227      | ns                         | g                                    | CFT073                     | ++                         | g                 | g   | g   | g       | g     | g        | g        | g    | g  | g      | g     | g       | g    | g     | g    | g     | g      | g        | g       | g        | g        | g         | g         | g       |
| g            | 3388930      | a            | 3531249      | ns                         | c                                    | clone D                    | ++                         | c                 | g   | g   | g       | g     | g        | g        | g    | g  | g      | g     | g       | g    | g     | g    | g     | g      | g        | g       | g        | g        | g         | g         | g       |
| c            | 3388975      | t            | 3531294      | ns                         | c                                    | CFT073                     | ++                         | c                 | c   | c   | c       | c     | c        | c        | c    | c  | c      | c     | c       | c    | c     | c    | c     | c      | c        | c       | c        | c        | c         | c         | c       |
| g            | 3389010      | a            | 3531329      | ns                         | g                                    | CFT073                     | ++                         | g                 | g   | g   | g       | g     | g        | g        | g    | g  | g      | g     | g       | g    | g     | g    | g     | g      | g        | g       | g        | g        | g         | g         | g       |
| g            | 3389100      | a            | 3531419      | ns                         | a                                    | clone D                    | ++                         | a                 | a   | a   | a       | a     | a        | a        | g    | g  | a      | a     | g       | g    | g     | g    | g     | a      | g        | a       | g        | g        | g         | g         | g       |
| g            | 3389174      | a            | 3531493      | s                          | a                                    | clone D                    | ++                         | a                 | a   | a   | a       | a     | a        | a        | g    | g  | a      | a     | g       | g    | g     | g    | g     | a      | g        | a       | g        | g        | g         | g         | g       |
| t            | 3389189      | c            | 3531508      | s                          | c                                    | clone D                    | ++                         | c                 | c   | c   | c       | c     | c        | c        | c    | c  | c      | c     | c       | c    | c     | c    | c     | c      | c        | c       | c        | c        | c         | c         | c       |
| a            | 3389192      | t            | 3531511      | s                          | t                                    | clone D                    | ++                         | t                 | t   | t   | t       | t     | t        | t        | t    | t  | t      | t     | t       | t    | t     | t    | t     | t      | t        | t       | t        | t        | t         | t         | t       |
| c            | 3389195      | t            | 3531514      | s                          | t                                    | clone D                    | ++                         | t                 | t   | t   | t       | t     | t        | t        | c    | c  | t      | t     | c       | c    | c     | c    | c     | t      | c        | t       | c        | t        | c         | t         | c       |
| c            | 3389246      | a            | 3531565      | s                          | a                                    | clone D                    | ++                         | a                 | a   | a   | a       | a     | a        | a        | a    | a  | a      | a     | a       | a    | a     | a    | a     | a      | a        | a       | a        | a        | a         | a         | a       |
| t            | 3389249      | g            | 3531568      | s                          | g                                    | clone D                    | ++                         | g                 | g   | g   | g       | g     | g        | g        | g    | g  | g      | g     | g       | g    | g     | g    | g     | t      | g        | t       | g        | g        | g         | g         | g       |
| t            | 3389267      | c            | 3531585      | s                          | c                                    | clone D                    | ++                         | c                 | c   | c   | c       | c     | c        | c        | t    | t  | c      | c     | t       | t    | t     | t    | t     | t      | t        | t       | t        | t        | t         | t         | t       |
| a            | 3389323      | t            | 3531641      | ns                         | t                                    | clone D                    | ++                         | t                 | g   | t   | t       | t     | g        | g        | g    | g  | t      | g     | g       | g    | g     | g    | g     | g      | g        | g       | g        | g        | g         | g         | g       |
| c            | 3389332      | t            | 3531650      | ns                         | t                                    | clone D                    | ++                         | t                 | c   | t   | t       | t     | c        | c        | c    | t  | c      | t     | t       | c    | c     | c    | c     | t      | c        | t       | c        | c        | c         | c         | c       |
| t            | 3389442      | a            | 3531760      | ns                         | a                                    | clone D                    | ++                         | a                 | a   | a   | a       | a     | a        | a        | a    | a  | t      | a     | a       | a    | a     | a    | a     | t      | a        | t       | a        | a        | a         | a         | a       |
| g            | 3389444      | c            | 3531762      | s                          | c                                    | clone D                    | ++                         | c                 | c   | c   | c       | c     | c        | c        | c    | c  | g      | c     | c       | c    | c     | c    | c     | g      | c        | c       | c        | c        | c         | c         | c       |
| t            | 3389468      | c            | 3531786      | s                          | c                                    | clone D                    | ++                         | c                 | c   | c   | c       | c     | c        | c        | c    | c  | t      | t     | c       | c    | c     | c    | c     | t      | t        | t       | t        | t        | t         | t         | t       |
| t            | 3389510      | c            | 3531828      | s                          | c                                    | clone D                    | ++                         | c                 | c   | c   | c       | c     | c        | c        | c    | c  | c      | c     | c       | c    | c     | c    | c     | c      | c        | c       | c        | c        | c         | c         | c       |
| a            | 3389522      | g            | 3531840      | s                          | g                                    | clone D                    | ++                         | g                 | g   | g   | g       | g     | g        | g        | g    | g  | g      | g     | g       | g    | g     | g    | g     | g      | g        | g       | g        | g        | g         | g         | g       |
| t            | 3389534      | c            | 3531852      | s                          | c                                    | clone D                    | ++                         | c                 | c   | c   | c       | c     | c        | c        | t    | t  | c      | c     | t       | t    | t     | t    | t     | c      | t        | c       | t        | t        | t         | t         | t       |

| Clone D base | Clone D site | CFT 073 base | CFT 073 site | mutation type <sup>a</sup> | Inferred ancestral base <sup>b</sup> | lineage inferred to mutate | Support level <sup>c</sup> | ED1a <sup>d</sup> | 536 | S88 | APEC O1 | UT189 | E2348/69 | ATCC8739 | K-12 | HS | SMS3-5 | IAI39 | E24377A | SE11 | 55989 | IAI1 | Sakai | UMN026 | B4 Sb227 | F5 8401 | SS Ss046 | D1 Sd197 | B18 BS512 | F2a 2457T | F2a 301 |
|--------------|--------------|--------------|--------------|----------------------------|--------------------------------------|----------------------------|----------------------------|-------------------|-----|-----|---------|-------|----------|----------|------|----|--------|-------|---------|------|-------|------|-------|--------|----------|---------|----------|----------|-----------|-----------|---------|
| t            | 3389546      | a            | 3531864      | nc                         | a                                    | clone D                    | ++                         | a                 | a   | a   | a       | a     | a        | a        | t    | g  | a      | a     | g       | t    | t     | t    | a     | t      |          |         |          | t        | t         |           |         |
| g            | 3389585      | a            | 3531903      | nc                         | g                                    | CFT073                     | ++                         | g                 | g   | g   | g       | g     | g        | g        | g    | g  | g      | g     | g       | g    | g     | g    | g     | g      | g        | g       | g        | g        | g         | g         |         |
| a            | 3389609      | g            | 3531927      | nc                         | g                                    | clone D                    | ++                         | g                 | g   | g   | g       | g     | g        | g        | g    | g  | g      | g     | g       | g    | g     | g    | g     | g      | g        | g       | g        | g        | g         | g         |         |
| a            | 3389642      | c            | 3531960      | nc                         | c                                    | clone D                    | ++                         | c                 | c   | c   | c       | c     | c        | c        | a    | a  | c      | c     | a       | a    | g     | a    | c     | g      |          |         |          | a        | g         |           |         |
| c            | 3389662      | g            | 3531980      | nc                         | g                                    | clone D                    | ++                         | g                 | g   | g   | g       | g     | g        | g        |      | c  | g      | g     | c       | c    | c     | c    | g     | c      |          |         |          | g        | c         |           |         |
| g            | 3389663      | c            | 3531981      | nc                         | c                                    | clone D                    | ++                         | c                 | c   | c   | c       | c     | c        | c        |      | g  | c      | c     | g       | g    | g     | g    | c     | g      |          |         |          | g        | g         |           |         |
| g            | 3389729      | a            | 3532047      | nc                         | a                                    | clone D                    | ++                         | a                 | a   | a   | a       | a     | a        | a        |      | a  | t      | t     | a       | a    | a     | a    | a     | g      |          |         |          | a        | g         |           |         |
| g            | 3389752      | a            | 3532070      | nc                         | g                                    | CFT073                     | ++                         | g                 | a   | g   | g       | g     | g        | g        |      | g  | a      | a     | g       | g    | g     | g    | g     | g      | g        | g       | g        | g        | g         | g         |         |
| g            | 3389756      | a            | 3532074      | nc                         | g                                    | CFT073                     | ++                         | g                 | a   | g   | g       | g     | g        | g        |      | g  | g      | g     | g       | g    | g     | g    | g     | g      | g        | g       | g        | g        | g         | g         |         |
| t            | 3389783      | c            | 3532101      | nc                         | c                                    | clone D                    | ++                         | c                 | c   | c   | c       | c     | c        | c        |      | c  | c      | c     | c       | c    | c     | c    | c     | c      | c        | c       | c        | c        | c         | c         |         |
| a            | 3389789      | g            | 3532107      | nc                         | g                                    | clone D                    | ++                         | g                 | g   | g   | g       | g     | g        | g        |      | a  | g      | g     | a       | a    | a     | a    | g     | a      |          |         |          | g        | a         |           |         |
| c            | 3389799      | t            | 3532117      | nc                         | t                                    | clone D                    | ++                         | t                 | c   | t   | t       | t     | t        | t        |      | c  | c      | c     | c       | c    | c     | c    | c     | c      | c        | c       | c        | c        | c         | c         |         |
| g            | 3389810      | a            | 3532128      | nc                         | a                                    | clone D                    | ++                         | a                 | a   | a   | a       | a     | a        | a        |      | a  | a      | a     | a       | a    | a     | a    | a     | a      | a        | a       | a        | a        | g         | a         |         |
| c            | 3389815      | t            | 3532133      | nc                         | t                                    | clone D                    | ++                         | t                 | t   | t   | t       | t     | t        | t        |      | t  | t      | t     | t       | t    | t     | t    | t     | t      | t        | t       | t        | t        | t         | t         |         |
| t            | 3389818      | g            | 3532136      | nc                         | g                                    | clone D                    | ++                         | g                 | g   | g   | g       | g     | g        | g        |      | g  | g      | g     | g       | g    | g     | g    | g     | g      | g        | g       | g        | g        | g         | g         | g       |
| g            | 3389819      | a            | 3532137      | nc                         | a                                    | clone D                    | ++                         | a                 | a   | a   | a       | a     | a        | a        |      | c  | a      | a     | a       | a    | a     | a    | a     | a      | a        | a       | a        | a        | a         | a         | a       |
| g            | 3389822      | a            | 3532140      | nc                         | a                                    | clone D                    | ++                         | a                 | g   | a   | a       | a     | a        | a        |      | a  | a      | a     | a       | a    | a     | a    | a     | a      | a        | a       | a        | a        | a         | a         | a       |
| a            | 3389824      | c            | 3532142      | nc                         | c                                    | clone D                    | ++                         | c                 | a   | c   | c       | c     | c        | c        |      | c  | c      | c     | c       | c    | c     | c    | c     | t      | c        |         |          | t        | c         |           |         |
| t            | 3389826      | g            | 3532144      | nc                         | g                                    | clone D                    | ++                         | g                 | g   | g   | g       | g     | g        | g        |      | g  | g      | g     | g       | g    | g     | g    | g     | g      | g        | g       | g        | g        | g         | g         | g       |
| g            | 3389852      | c            | 3532170      | nc                         | c                                    | clone D                    | ++                         | c                 | c   | c   | c       | c     | c        | c        |      | g  | c      | c     | g       | g    | g     | g    | g     | g      | g        | g       | g        | c        | g         |           |         |
| g            | 3389856      | a            | 3532174      | nc                         | g                                    | CFT073                     | ++                         | g                 | g   | g   | g       | g     | g        | g        |      | g  | g      | g     | g       | g    | g     | g    | g     | g      | g        | g       | g        | g        | g         | g         | g       |
| g            | 3389929      | a            | 3532247      | ns                         | a                                    | clone D                    | ++                         | a                 | a   | a   | a       | a     | a        | a        |      | g  | a      | a     | g       | g    | g     | g    | a     | g      |          |         |          | g        | g         |           |         |
| c            | 3389986      | g            | 3532304      | ns                         | g                                    | clone D                    | ++                         | g                 | g   | g   | g       | g     | g        | g        |      | g  | g      | g     | g       | g    | g     | g    | g     | g      | g        | g       | g        | g        | g         | g         | g       |
| g            | 3390043      | a            | 3532361      | ns                         | a                                    | clone D                    | ++                         | a                 | a   | a   | a       | a     | a        | a        |      | a  | a      | a     | a       | g    | a     | a    | a     | a      | a        | a       | a        | a        | a         | a         | a       |
| t            | 3390121      | a            | 3532439      | ns                         | a                                    | clone D                    | ++                         | a                 | a   | a   | a       | a     | a        | a        |      | a  | a      | a     | a       | a    | a     | a    | a     | a      | a        | a       | a        | a        | a         | a         | a       |
| c            | 3390178      | t            | 3532496      | ns                         | t                                    | clone D                    | ++                         | t                 | t   | t   | t       | t     | t        | t        |      | t  | t      | t     | t       | t    | t     | t    | c     | t      |          |         | t        | t        | t         | t         |         |
| g            | 3390180      | a            | 3532498      | ns                         | a                                    | clone D                    | ++                         | a                 | a   | a   | a       | a     | a        | a        |      | a  | a      | a     | a       | a    | a     | a    | g     | a      |          |         | a        | a        | a         | a         | a       |
| g            | 3390181      | t            | 3532499      | ns                         | t                                    | clone D                    | ++                         | t                 | t   | t   | t       | t     | t        | t        |      | a  | t      | t     | a       | a    | a     | a    | g     | a      |          |         | a        | a        | a         | a         | a       |

| Clone D base | Clone D site | CFT 073 base | CFT 073 site | mutation type <sup>a</sup> | Inferred ancestral base <sup>b</sup> | lineage inferred to mutate | Support level <sup>c</sup> | ED1a <sup>d</sup> | 536 | S88 | APEC O1 | UT189 | E2348/69 | ATCC8739 | K-12 | HS | SMS3-5 | IAI39 | E24377A | SE11 | 55989 | IAI1 | Sakai | UMN026 | B4 Sb227 | F5 8401 | SS Ss046 | D1 Sd197 | B18 BS512 | F2a 2457T | F2a 301 |  |
|--------------|--------------|--------------|--------------|----------------------------|--------------------------------------|----------------------------|----------------------------|-------------------|-----|-----|---------|-------|----------|----------|------|----|--------|-------|---------|------|-------|------|-------|--------|----------|---------|----------|----------|-----------|-----------|---------|--|
| g            | 3390184      | a            | 3532502      | ns                         | a                                    | clone D                    | ++                         | a                 | a   | a   | a       | a     | a        |          | a    | a  | a      | a     | a       | a    | a     | a    | a     | a      |          |         |          | a        | a         |           |         |  |
| t            | 3390207      | c            | 3532525      | ns                         | c                                    | clone D                    | ++                         | c                 | c   | c   | c       | c     | c        |          | t    | c  | c      | c     | t       | t    | t     | t    |       | t      | t        |         |          | t        | t         |           |         |  |
| g            | 3390228      | a            | 3532546      | ns                         | a                                    | clone D                    | ++                         | a                 | g   | a   | a       | a     | a        |          | g    | g  | g      | g     | g       | g    | g     | g    | g     | g      | g        |         |          | g        | g         |           |         |  |
| t            | 3390250      | c            | 3532568      | ns                         | c                                    | clone D                    | ++                         | c                 | c   | c   | c       | c     | c        |          | c    | c  | t      | c     | c       | c    | c     | c    | c     | c      | c        | c       |          |          | c         | c         |         |  |
| c            | 3390268      | t            | 3532586      | ns                         | c                                    | CFT073                     | ++                         | c                 | t   | c   | c       | c     | c        |          | c    | c  | c      | c     | c       | c    | c     | c    | c     | t      | t        |         |          | c        | t         |           |         |  |
| a            | 3405079      | g            | 3534253      | nc                         | g                                    | clone D                    | ++                         | g                 | g   | g   | g       | g     | g        | g        | g    | g  | g      | g     | g       | g    | g     | g    | g     | g      | g        | g       |          |          |           | g         | g       |  |
| c            | 3405139      | a            | 3534313      | s                          | a                                    | clone D                    | ++                         | a                 | c   | a   | a       | a     | a        | a        | a    | a  | a      | a     | c       | a    | a     | a    | a     | a      | a        | a       | a        |          |           | -         | -       |  |
| a            | 3405142      | g            | 3534316      | s                          | g                                    | clone D                    | ++                         | g                 | a   | g   | g       | g     | g        | g        | g    | g  | g      | g     | a       | g    | g     | g    | g     | g      | g        | g       | g        |          |           | g         | g       |  |
| g            | 3405151      | a            | 3534325      | s                          | a                                    | clone D                    | ++                         | a                 | g   | a   | a       | a     | a        | a        | a    | a  | a      | a     | g       | a    | a     | a    | a     | a      | a        | a       | a        |          |           | a         | a       |  |
| g            | 3405196      | a            | 3534370      | s                          | g                                    | CFT073                     | +                          | c                 | g   | c   | c       | c     | g        | g        | g    | g  | g      | g     | g       | g    | g     | g    | g     | g      | g        | g       | g        |          |           | g         | g       |  |
| a            | 3405241      | g            | 3534415      | s                          | g                                    | clone D                    | ++                         | g                 | g   | g   | g       | g     | g        | g        | g    | g  | g      | g     | g       | g    | g     | g    | g     | g      | g        | g       | g        |          |           | g         | g       |  |
| a            | 3405244      | g            | 3534418      | s                          | g                                    | clone D                    | ++                         | g                 | a   | g   | g       | g     | g        | g        | g    | g  | g      | g     | a       | g    | g     | g    | g     | g      | g        | g       | g        |          |           | g         | g       |  |
| a            | 3405274      | g            | 3534448      | s                          | g                                    | clone D                    | ++                         | g                 | a   | g   | g       | g     | a        | g        | g    | g  | g      | g     | a       | a    | a     | a    | a     | a      | a        | a       | a        |          |           | a         | a       |  |
| a            | 3405292      | g            | 3534466      | s                          | g                                    | clone D                    | ++                         | g                 | a   | g   | g       | g     | g        | g        | g    | g  | g      | g     | a       | a    | a     | a    | a     | g      | a        | a       | a        |          |           | a         | a       |  |
| a            | 3405346      | g            | 3534520      | s                          | g                                    | clone D                    | ++                         | g                 | g   | g   | g       | g     | g        | g        | g    | g  | g      | g     | g       | g    | g     | g    | g     | g      | g        | g       | g        |          |           | g         | g       |  |
| a            | 3405352      | t            | 3534526      | s                          | t                                    | clone D                    | ++                         | t                 | a   | a   | a       | a     | a        | a        | a    | a  | a      | a     | a       | t    | t     | t    | a     | a      | t        | t       |          |          | t         | t         |         |  |
| g            | 3405355      | a            | 3534529      | s                          | a                                    | clone D                    | ++                         | a                 | g   | g   | g       | g     | g        | g        | g    | g  | g      | g     | g       | a    | a     | a    | g     | g      | a        | a       |          |          | a         | a         |         |  |
| g            | 3405358      | a            | 3534532      | s                          | a                                    | clone D                    | ++                         | a                 | g   | g   | g       | g     | g        | g        | g    | g  | g      | g     | g       | a    | a     | a    | g     | a      | a        | a       |          |          | a         | a         |         |  |
| a            | 3405409      | g            | 3534583      | s                          | g                                    | clone D                    | ++                         | g                 | a   | a   | a       | a     | g        | g        | g    | g  | g      | g     | a       | a    | a     | a    | g     | g      | a        | a       |          |          | a         | a         |         |  |
| c            | 3405412      | t            | 3534586      | s                          | t                                    | clone D                    | ++                         | t                 | c   | c   | c       | c     | c        | c        | c    | c  | c      | c     | c       | c    | c     | c    | c     | c      | c        | c       | c        |          |           | c         | c       |  |
| t            | 3405433      | a            | 3534607      | s                          | a                                    | clone D                    | ++                         | a                 | t   | t   | t       | t     | t        | t        | t    | t  | t      | t     | t       | t    | t     | t    | t     | t      | t        | t       |          |          | t         | t         |         |  |
| g            | 3405463      | a            | 3534637      | s                          | a                                    | clone D                    | ++                         | a                 | g   | a   | a       | a     | a        | g        | g    | g  | g      | g     | g       | g    | g     | g    | g     | a      | g        | g       |          |          | g         | g         |         |  |
| g            | 3405487      | a            | 3534661      | s                          | g                                    | CFT073                     | ++                         | g                 | g   | g   | g       | g     | g        | g        | g    | g  | g      | g     | g       | g    | g     | g    | g     | g      | g        | g       |          |          | g         | g         |         |  |
| c            | 3405490      | t            | 3534664      | s                          | c                                    | CFT073                     | ++                         | c                 | c   | c   | c       | c     | c        | c        | c    | c  | c      | c     | c       | c    | c     | c    | c     | c      | c        | c       | c        |          |           | t         | t       |  |
| a            | 3405513      | g            | 3534687      | s                          | a                                    | CFT073                     | ++                         | a                 | a   | a   | a       | a     | g        | g        | g    | g  | g      | a     | a       | a    | a     | a    | a     | g      | a        | a       |          |          | a         | a         |         |  |
| c            | 3405559      | a            | 3534733      | s                          | a                                    | clone D                    | ++                         | a                 | c   | c   | c       | c     | c        | a        | a    | a  | a      | c     | c       | c    | c     | a    | a     | a      | c        | c       |          |          | c         | c         |         |  |
| g            | 3405571      | c            | 3534745      | s                          | c                                    | clone D                    | ++                         | c                 | g   | g   | g       | g     | c        | c        | c    | c  | c      | g     | g       | g    | g     | g    | c     | g      | g        | g       |          |          | g         | g         |         |  |
| t            | 3405576      | c            | 3534750      | ns                         | c                                    | clone D                    | ++                         | c                 | c   | c   | c       | c     | c        | c        | c    | c  | c      | c     | c       | c    | c     | c    | c     | c      | c        | c       |          |          | c         | c         |         |  |





| Clone D base | Clone D site | CFT 073 base | CFT 073 site | mutation type <sup>a</sup> | Inferred ancestral base <sup>b</sup> | lineage inferred to mutate | Support level <sup>c</sup> | ED1a <sup>d</sup> | 536 | S88 | APEC O1 | UT189 | E2348/69 | ATCC8739 | K-12 | HS | SMS3-5 | IAI39 | E24377A | SE11 | 55989 | IAI1 | Sakai | UMN026 | B4 Sb227 | F5 8401 | SS Ss046 | D1 Sd197 | B18 BS512 | F2a 2457T | F2a 301 |
|--------------|--------------|--------------|--------------|----------------------------|--------------------------------------|----------------------------|----------------------------|-------------------|-----|-----|---------|-------|----------|----------|------|----|--------|-------|---------|------|-------|------|-------|--------|----------|---------|----------|----------|-----------|-----------|---------|
| a            | 3407791      | t            | 3536965      | s                          | t                                    | clone D                    | ++                         | t                 | a   | t   | t       | t     | a        | a        | a    | a  | a      | a     | a       | a    | a     | a    | a     | a      | a        | a       |          |          | a         | a         |         |
| g            | 3407794      | a            | 3536968      | s                          | a                                    | clone D                    | ++                         | a                 | g   | a   | a       | a     | g        | g        | g    | g  | g      | g     | g       | g    | g     | g    | g     | g      | g        | g       |          |          | g         | g         |         |
| c            | 3407797      | t            | 3536971      | s                          | t                                    | clone D                    | ++                         | t                 | c   | t   | t       | t     | c        | c        | c    | c  | c      | c     | c       | c    | c     | c    | c     | c      | c        | c       | c        |          |           | c         | c       |
| a            | 3407890      | c            | 3537064      | s                          | c                                    | clone D                    | ++                         | c                 | a   | c   | c       | c     | a        | a        | a    | a  | a      | a     | a       | a    | a     | a    | a     | a      | a        | a       | a        |          |           | a         | a       |
| a            | 3407962      | g            | 3537136      | s                          | g                                    | clone D                    | ++                         | g                 | g   | g   | g       | g     | g        | g        | g    | g  | g      | a     | g       | g    | g     | g    | g     | g      | g        | g       |          |          | g         | g         |         |
| a            | 3408004      | g            | 3537178      | s                          | g                                    | clone D                    | ++                         | g                 | a   | g   | g       | g     | g        | a        | a    | a  | a      | a     | a       | a    | a     | a    | a     | a      | a        | g       |          |          | g         | g         |         |
| t            | 3408066      | c            | 3537240      | ns                         | c                                    | clone D                    | ++                         | c                 | t   | c   | c       | c     | c        | t        | t    | t  | t      | t     | t       | t    | t     | t    | t     | t      | t        | t       | t        |          |           | t         | t       |
| t            | 3408072      | a            | 3537246      | ns                         | a                                    | clone D                    | ++                         | a                 | t   | a   | a       | a     | t        | t        | t    | t  | t      | t     | t       | t    | t     | t    | t     | t      | t        | t       | t        |          |           | t         | t       |
| g            | 3408291      | a            | 3537465      | s                          | a                                    | clone D                    | ++                         | a                 | g   | a   | a       | a     | g        | g        | g    | g  | g      | g     | g       | g    | g     | g    | g     | g      | a        | a       |          |          | a         | a         |         |
| g            | 3408319      | t            | 3537493      | s                          | t                                    | clone D                    | ++                         | t                 | g   | t   | t       | t     | g        | g        | g    | g  | g      | g     | g       | g    | g     | g    | g     | g      | g        | g       | g        |          |           | g         | g       |
| g            | 3408331      | a            | 3537505      | s                          | a                                    | clone D                    | ++                         | a                 | g   | a   | a       | a     | g        | g        | g    | g  | g      | g     | g       | g    | g     | g    | g     | g      | g        | g       | g        |          |           | g         | g       |
| a            | 3408337      | c            | 3537511      | ns                         | c                                    | clone D                    | ++                         | c                 | a   | c   | c       | c     | c        | a        | a    | a  | a      | a     | a       | a    | a     | a    | a     | a      | c        | c       |          |          | c         | c         |         |
| t            | 3408379      | c            | 3537553      | s                          | c                                    | clone D                    | ++                         | c                 | t   | c   | c       | c     | t        | t        | t    | t  | t      | t     | t       | t    | t     | t    | t     | t      | t        | t       | t        |          |           | t         | t       |
| t            | 3408382      | c            | 3537556      | s                          | c                                    | clone D                    | ++                         | c                 | t   | c   | c       | c     | c        | c        | c    | c  | c      | c     | t       | c    | c     | c    | c     | c      | c        | c       | c        |          |           | c         | c       |
| g            | 3408466      | a            | 3537640      | s                          | a                                    | clone D                    | ++                         | a                 | g   | a   | a       | a     | g        | g        | g    | g  | g      | g     | g       | g    | g     | g    | g     | g      | g        | g       | g        |          |           | g         | g       |
| a            | 3408526      | g            | 3537700      | s                          | g                                    | clone D                    | ++                         | g                 | a   | g   | g       | g     | a        | g        | g    | g  | g      | a     | g       | g    | g     | g    | g     | a      | g        | g       |          |          | g         | g         |         |
| g            | 3408534      | a            | 3537708      | ns                         | g                                    | CFT073                     | ++                         | g                 | g   | g   | g       | g     | g        | g        | g    | g  | g      | g     | g       | g    | g     | g    | g     | g      | g        | g       | g        |          |           | g         | g       |
| a            | 3408565      | g            | 3537739      | s                          | g                                    | clone D                    | ++                         | g                 | a   | g   | g       | g     | g        | g        | g    | g  | a      | a     | a       | a    | a     | a    | a     | g      | a        | a       |          |          | a         | a         |         |
| c            | 3408571      | t            | 3537745      | s                          | t                                    | clone D                    | ++                         | t                 | c   | t   | t       | t     | c        | c        | c    | c  | c      | c     | c       | c    | c     | c    | c     | c      | c        | c       | c        |          |           | c         | c       |
| t            | 3408574      | c            | 3537748      | s                          | c                                    | clone D                    | ++                         | c                 | t   | c   | c       | c     | c        | c        | c    | c  | t      | t     | t       | t    | t     | t    | t     | c      | t        | t       | t        |          |           | t         | t       |
| a            | 3408586      | g            | 3537760      | s                          | g                                    | clone D                    | ++                         | g                 | a   | g   | g       | g     | g        | g        | g    | g  | a      | g     | g       | g    | g     | g    | g     | g      | g        | g       | g        |          |           | g         | g       |
| g            | 3408622      | a            | 3537796      | ns                         | a                                    | clone D                    | ++                         | a                 | g   | a   | a       | a     | g        | g        | g    | g  | g      | g     | g       | g    | g     | g    | g     | g      | g        | g       | g        |          |           | g         | g       |
| c            | 3408624      | t            | 3537798      | ns                         | t                                    | clone D                    | ++                         | t                 | c   | t   | t       | t     | c        | c        | c    | c  | c      | c     | c       | c    | c     | c    | c     | c      | c        | c       | c        |          |           | c         | c       |
| c            | 3408649      | t            | 3537823      | s                          | t                                    | clone D                    | ++                         | t                 | c   | t   | t       | t     | c        | t        | t    | t  | c      | c     | c       | c    | c     | c    | c     | c      | c        | t       | t        |          |           | t         | t       |
| c            | 3408652      | t            | 3537826      | s                          | t                                    | clone D                    | ++                         | t                 | c   | t   | t       | t     | c        | t        | t    | t  | c      | c     | c       | c    | c     | c    | c     | c      | c        | t       | t        |          |           | t         | t       |
| g            | 3408655      | a            | 3537829      | s                          | a                                    | clone D                    | ++                         | a                 | g   | a   | a       | a     | g        | a        | a    | a  | g      | g     | g       | g    | g     | g    | g     | g      | g        | a       | a        |          |           | a         | a       |
| g            | 3408745      | a            | 3537919      | s                          | g                                    | CFT073                     | ++                         | g                 | g   | a   | a       | a     | g        | g        | g    | g  | g      | g     | g       | g    | g     | g    | g     | g      | g        | g       | g        |          |           | g         | g       |
| g            | 3408909      | a            | 3538083      | s                          | g                                    | CFT073                     | ++                         | g                 | g   | g   | g       | g     | g        | g        | g    | g  | g      | g     | g       | g    | g     | g    | g     | g      | g        | g       | g        |          |           | g         | g       |

| Clone D base | Clone D site | CFT 073 base | CFT 073 site | mutation type <sup>a</sup> | Inferred ancestral base <sup>b</sup> | lineage inferred to mutate | Support level <sup>c</sup> | ED1a <sup>d</sup> | 536 | S88 | APEC O1 | UT189 | E2348/69 | ATCC8739 | K-12 | HS | SMS3-5 | IAI39 | E24377A | SE11 | 55989 | IAI1 | Sakai | UMN026 | B4 Sb227 | F5 8401 | SS Ss046 | D1 Sd197 | B18 BS512 | F2a 2457T | F2a 301 |
|--------------|--------------|--------------|--------------|----------------------------|--------------------------------------|----------------------------|----------------------------|-------------------|-----|-----|---------|-------|----------|----------|------|----|--------|-------|---------|------|-------|------|-------|--------|----------|---------|----------|----------|-----------|-----------|---------|
| t            | 3408928      | c            | 3538102      | s                          | c                                    | clone D                    | ++                         | c                 | t   | c   | c       | c     | t        | t        | t    | t  | t      | t     | t       | t    | t     | t    | t     | t      | t        | t       |          |          | t         | t         |         |
| a            | 3408976      | g            | 3538150      | s                          | g                                    | clone D                    | ++                         | g                 | a   | g   | g       | g     | a        | a        | a    | a  | a      | a     | a       | a    | a     | a    | a     | a      | a        | a       |          |          | a         | a         |         |
| t            | 3408997      | a            | 3538171      | s                          | ?                                    | ?                          | +/-                        | c                 | c   | a   | a       | a     | c        | c        | c    | c  | c      | c     | t       | c    | c     | c    | c     | c      | c        | c       |          |          | c         | c         |         |
| c            | 3409001      | t            | 3538175      | ns                         | t                                    | clone D                    | ++                         | t                 | c   | t   | t       | t     | c        | c        | c    | c  | c      | c     | c       | c    | c     | c    | c     | c      | c        | c       |          |          | c         | c         |         |
| c            | 3409003      | g            | 3538177      | ns                         | g                                    | clone D                    | ++                         | g                 | c   | g   | g       | g     | a        | c        | c    | c  | c      | c     | c       | c    | c     | c    | c     | c      | c        | c       |          |          | c         | c         |         |
| c            | 3409006      | a            | 3538180      | s                          | a                                    | clone D                    | ++                         | a                 | c   | a   | a       | a     | c        | c        | c    | c  | c      | c     | c       | c    | c     | c    | c     | c      | c        | c       |          |          | c         | c         |         |
| t            | 3409009      | c            | 3538183      | s                          | c                                    | clone D                    | ++                         | c                 | t   | c   | c       | c     | t        | t        | t    | t  | t      | t     | t       | t    | t     | t    | t     | t      | t        | t       |          |          | t         | t         |         |
| c            | 3409012      | t            | 3538186      | s                          | t                                    | clone D                    | ++                         | t                 | t   | t   | t       | t     | t        | c        | c    | c  | c      | c     | c       | c    | c     | c    | c     | c      | c        | c       |          |          | c         | c         |         |
| t            | 3409123      | c            | 3538297      | s                          | c                                    | clone D                    | ++                         | c                 | t   | c   | c       | c     | t        | t        | t    | t  | c      | t     | t       | t    | t     | t    | t     | t      | t        | t       |          |          | t         | t         |         |
| t            | 3409144      | c            | 3538318      | s                          | c                                    | clone D                    | ++                         | c                 | t   | c   | c       | c     | t        | t        | t    | t  | c      | t     | t       | t    | t     | t    | t     | t      | t        | t       |          |          | t         | t         |         |
| t            | 3409150      | c            | 3538324      | s                          | c                                    | clone D                    | ++                         | c                 | t   | c   | c       | c     | t        | t        | t    | t  | c      | t     | t       | t    | t     | t    | t     | t      | t        | t       |          |          | t         | t         |         |
| a            | 3409176      | c            | 3538350      | ns                         | c                                    | clone D                    | ++                         | c                 | a   | c   | c       | c     | c        | a        | a    | a  | c      | a     | a       | a    | a     | a    | a     | a      | a        | c       |          |          | c         | c         |         |
| c            | 3409181      | t            | 3538355      | ns                         | t                                    | clone D                    | ++                         | t                 | c   | t   | t       | t     | c        | c        | c    | c  | t      | c     | c       | c    | c     | c    | c     | c      | c        | c       |          |          | t         | t         |         |
| g            | 3409186      | a            | 3538360      | s                          | g                                    | CFT073                     | ++                         | g                 | g   | g   | g       | g     | g        | g        | g    | g  | g      | g     | g       | g    | g     | g    | g     | g      | g        | g       |          |          | g         | g         |         |
| c            | 3409192      | g            | 3538366      | s                          | g                                    | clone D                    | ++                         | g                 | c   | g   | g       | g     | g        | c        | c    | c  | g      | c     | c       | c    | c     | c    | c     | c      | c        | g       |          |          | a         | a         |         |
| g            | 3409198      | a            | 3538372      | s                          | a                                    | clone D                    | ++                         | a                 | g   | a   | a       | a     | g        | g        | g    | g  | a      | g     | g       | g    | g     | g    | g     | g      | a        | g       |          |          | g         | g         |         |
| a            | 3409203      | g            | 3538377      | s                          | g                                    | clone D                    | ++                         | g                 | a   | g   | g       | g     | g        | g        | g    | g  | g      | a     | g       | g    | g     | g    | g     | g      | g        | g       |          |          | g         | g         |         |
| c            | 3409204      | t            | 3538378      | ns                         | t                                    | clone D                    | ++                         | t                 | c   | t   | t       | t     | t        | c        | c    | c  | t      | c     | c       | c    | c     | c    | c     | c      | t        | t       |          |          | t         | t         |         |
| c            | 3409205      | t            | 3538379      | ns                         | t                                    | clone D                    | ++                         | t                 | c   | t   | t       | t     | t        | c        | c    | c  | t      | c     | c       | c    | c     | c    | c     | c      | t        | t       |          |          | t         | t         |         |
| t            | 3409207      | c            | 3538381      | ns                         | c                                    | clone D                    | ++                         | c                 | t   | c   | c       | c     | c        | t        | t    | t  | c      | t     | t       | t    | t     | t    | t     | t      | t        | c       |          |          | c         | c         |         |
| g            | 3409208      | a            | 3538382      | ns                         | a                                    | clone D                    | ++                         | a                 | g   | a   | a       | a     | a        | g        | g    | g  | a      | g     | g       | g    | g     | g    | g     | a      | a        | a       |          |          | a         | a         |         |
| t            | 3409209      | c            | 3538383      | ns                         | c                                    | clone D                    | ++                         | c                 | t   | c   | c       | c     | c        | t        | t    | t  | c      | t     | t       | t    | t     | t    | t     | c      | c        | c       |          |          | c         | c         |         |
| t            | 3409210      | g            | 3538384      | s                          | g                                    | clone D                    | ++                         | g                 | t   | g   | g       | g     | g        | t        | t    | t  | g      | t     | t       | t    | t     | t    | t     | g      | g        | g       |          |          | g         | g         |         |
| c            | 3409213      | a            | 3538387      | s                          | a                                    | clone D                    | ++                         | a                 | c   | a   | a       | a     | c        | c        | c    | c  | a      | c     | c       | c    | c     | c    | c     | c      | c        | c       |          |          | c         | c         |         |
| t            | 3409254      | c            | 3538428      | ns                         | c                                    | clone D                    | ++                         | c                 | t   | c   | c       | c     | c        | c        | c    | c  | c      | t     | c       | c    | c     | c    | c     | c      | c        | c       |          |          | c         | c         |         |
| c            | 3409296      | a            | 3538470      | nc                         | a                                    | clone D                    | ++                         | a                 | a   | a   | a       | a     | c        | a        | a    | a  | c      | c     | a       | a    | a     | a    | a     | a      | a        | a       |          |          | c         | c         |         |
| t            | 3409432      | c            | 3538606      | s                          | c                                    | clone D                    | ++                         | c                 | c   | c   | c       | c     | c        | c        | c    | c  | c      | t     | c       | c    | c     | c    | c     | c      | c        | c       |          |          | c         | c         |         |
| t            | 3409441      | c            | 3538615      | s                          | c                                    | clone D                    | ++                         | c                 | c   | c   | c       | c     | c        | t        | t    | t  | c      | t     | c       | t    | t     | t    | t     | c      | c        | c       |          |          | c         | c         |         |

| Clone D base | Clone D site | CFT 073 base | CFT 073 site | mutation type <sup>a</sup> | Inferred ancestral base <sup>b</sup> | lineage inferred to mutate | Support level <sup>c</sup> | ED1a <sup>d</sup> | 536 | S88 | APEC O1 | UT189 | E2348/69 | ATCC8739 | K-12 | HS | SMS3-5 | IAI39 | E24377A | SE11 | 55989 | IAI1 | Sakai | UMN026 | B4 Sb227 | F5 8401 | SS Ss046 | D1 Sd197 | B18 BS512 | F2a 2457T | F2a 301 |
|--------------|--------------|--------------|--------------|----------------------------|--------------------------------------|----------------------------|----------------------------|-------------------|-----|-----|---------|-------|----------|----------|------|----|--------|-------|---------|------|-------|------|-------|--------|----------|---------|----------|----------|-----------|-----------|---------|
| a            | 3409443      | g            | 3538617      | s                          | g                                    | clone D                    | ++                         | g                 | g   | g   | g       | g     | g        | a        | a    | a  | g      | a     | g       | a    | a     | a    | g     | g      | g        |         |          |          | g         | g         |         |
| c            | 3409495      | g            | 3538669      | s                          | g                                    | clone D                    | ++                         | g                 | g   | g   | g       | g     | g        | g        | g    | g  | g      | c     | g       | g    | g     | g    | g     | g      | g        | g       |          |          |           | g         | g       |
| g            | 3409639      | a            | 3538813      | s                          | a                                    | clone D                    | ++                         | a                 | a   | a   | a       | a     | a        | a        | a    | a  | a      | g     | a       | a    | a     | a    | a     | a      | a        | a       |          |          |           | a         | a       |
| c            | 3409880      | t            | 3539054      | s                          | t                                    | clone D                    | ++                         | t                 | c   | t   | t       | t     | t        | t        | t    | t  | t      | c     | t       | t    | t     | t    | t     | t      | t        | t       |          |          |           | t         | t       |
| c            | 3410114      | t            | 3539288      | s                          | c                                    | CFT073                     | ++                         | c                 | c   | c   | c       | c     | t        | t        | t    | t  | t      | c     | t       | t    | t     | t    | t     | t      | t        | t       |          |          |           | t         | t       |
| t            | 3410124      | a            | 3539298      | ns                         | t                                    | CFT073                     | ++                         | t                 | t   | t   | t       | t     | c        | t        | t    | t  | t      | t     | t       | t    | t     | t    | t     | t      | t        | t       |          |          |           | t         | t       |
| g            | 3410192      | a            | 3539366      | s                          | g                                    | CFT073                     | ++                         | g                 | g   | a   | a       | a     | g        | g        | g    | g  | g      | g     | g       | g    | g     | g    | g     | g      | g        | g       |          |          |           | g         | g       |
| g            | 3410195      | a            | 3539369      | s                          | a                                    | clone D                    | ++                         | a                 | g   | a   | a       | a     | a        | g        | g    | g  | a      | g     | a       | a    | a     | a    | a     | a      | a        | a       |          |          |           | a         | a       |
| a            | 3410204      | g            | 3539378      | s                          | g                                    | clone D                    | ++                         | g                 | a   | g   | g       | g     | g        | g        | g    | g  | g      | a     | g       | g    | g     | g    | g     | g      | g        | g       |          |          |           | g         | g       |
| c            | 3410207      | t            | 3539381      | s                          | t                                    | clone D                    | ++                         | t                 | c   | t   | t       | t     | t        | t        | t    | t  | t      | c     | t       | t    | t     | t    | t     | t      | t        | t       |          |          |           | t         | t       |
| a            | 3410216      | t            | 3539390      | s                          | t                                    | clone D                    | ++                         | t                 | a   | t   | t       | t     | t        | t        | t    | t  | t      | a     | t       | t    | t     | t    | t     | t      | t        | t       |          |          |           | t         | t       |
| c            | 3410456      | t            | 3539630      | s                          | c                                    | CFT073                     | ++                         | c                 | c   | t   | t       | t     | c        | c        | c    | c  | c      | c     | c       | c    | c     | c    | c     | c      | c        | c       |          |          |           | c         | c       |
| c            | 3410480      | g            | 3539654      | s                          | c                                    | CFT073                     | ++                         | c                 | g   | g   | g       | g     | c        | c        | c    | c  | c      | c     | c       | c    | c     | c    | c     | c      | c        | g       |          |          |           | c         | c       |
| g            | 3410675      | a            | 3539849      | s                          | a                                    | clone D                    | ++                         | a                 | g   | a   | a       | a     | g        | g        | g    | g  | g      | g     | g       | g    | g     | g    | g     | g      | g        | g       |          |          |           | g         | g       |
| g            | 3410756      | t            | 3539930      | ns                         | t                                    | clone D                    | ++                         | t                 | g   | t   | t       | t     | t        | t        | t    | t  | t      | g     | t       | t    | t     | t    | t     | t      | t        | t       |          |          |           | t         | t       |
| g            | 3410762      | a            | 3539936      | s                          | g                                    | CFT073                     | ++                         | g                 | g   | g   | g       | g     | a        | g        | g    | g  | g      | g     | g       | g    | g     | g    | g     | g      | a        |         |          |          | g         | g         |         |
| g            | 3410825      | a            | 3539999      | s                          | a                                    | clone D                    | ++                         | a                 | g   | a   | a       | a     | g        | a        | a    | a  | g      | g     | a       | a    | a     | a    | a     | a      | g        |         |          |          | a         | a         |         |
| c            | 3410903      | g            | 3540077      | s                          | g                                    | clone D                    | ++                         | g                 | c   | g   | g       | g     | c        | g        | g    | g  | c      | c     | c       | g    | g     | g    | c     | g      |          |         |          | g        | g         |           |         |
| g            | 3410927      | t            | 3540101      | s                          | t                                    | clone D                    | ++                         | t                 | g   | t   | t       | t     | g        | a        | a    | a  | g      | g     | a       | a    | a     | a    | a     | g      |          |         |          | g        | g         |           |         |
| t            | 3410934      | c            | 3540108      | ns                         | c                                    | clone D                    | ++                         | c                 | t   | c   | c       | c     | c        | t        | t    | t  | t      | t     | t       | t    | t     | t    | t     | c      |          |         |          | c        | c         |           |         |
| t            | 3410956      | c            | 3540130      | s                          | c                                    | clone D                    | ++                         | c                 | t   | c   | c       | c     | c        | c        | c    | c  | t      | t     | c       | c    | c     | c    | c     | c      | c        |         |          |          | c         | c         |         |
| c            | 3410961      | t            | 3540135      | s                          | t                                    | clone D                    | ++                         | t                 | c   | t   | t       | t     | t        | t        | t    | t  | c      | c     | t       | t    | t     | t    | t     | t      | t        |         |          |          | t         | t         |         |
| a            | 3410982      | g            | 3540156      | s                          | g                                    | clone D                    | ++                         | g                 | a   | g   | g       | g     | g        | g        | g    | g  | a      | a     | g       | g    | g     | g    | g     | g      | g        |         |          |          | g         | g         |         |
| g            | 3411000      | a            | 3540174      | s                          | a                                    | clone D                    | ++                         | a                 | g   | a   | a       | a     | g        | g        | g    | g  | g      | g     | g       | g    | g     | g    | g     | g      | g        |         |          |          | g         | g         |         |
| a            | 3411042      | t            | 3540216      | s                          | t                                    | clone D                    | ++                         | t                 | a   | t   | t       | t     | a        | a        | a    | a  | a      | a     | a       | a    | a     | a    | a     | a      | a        |         |          |          | a         | a         |         |
| a            | 3411060      | g            | 3540234      | s                          | g                                    | clone D                    | ++                         | g                 | a   | g   | g       | g     | a        | g        | g    | g  | a      | a     | g       | g    | g     | g    | g     | a      |          |         |          | g        | g         |           |         |
| a            | 3411066      | g            | 3540240      | s                          | g                                    | clone D                    | ++                         | g                 | a   | g   | g       | g     | a        | a        | a    | a  | a      | a     | c       | a    | a     | c    | a     | a      | a        |         |          |          | a         | a         |         |
| a            | 3411099      | c            | 3540273      | s                          | c                                    | clone D                    | ++                         | c                 | a   | a   | a       | a     | a        | a        | a    | a  | a      | a     | a       | a    | a     | a    | a     | a      | a        |         |          |          | a         | a         |         |

| Clone D base | Clone D site | CFT 073 base | CFT 073 site | mutation type <sup>a</sup> | Inferred ancestral base <sup>b</sup> | lineage inferred to mutate | Support level <sup>c</sup> | ED1a <sup>d</sup> | 536 | S88 | APEC O1 | UT189 | E2348/69 | ATCC8739 | K-12 | HS | SMS3-5 | IAI39 | E24377A | SE11 | 55989 | IAI1 | Sakai | UMN026 | B4 Sb227 | F5 8401 | SS Ss046 | D1 Sd197 | B18 BS512 | F2a 2457T | F2a 301 |
|--------------|--------------|--------------|--------------|----------------------------|--------------------------------------|----------------------------|----------------------------|-------------------|-----|-----|---------|-------|----------|----------|------|----|--------|-------|---------|------|-------|------|-------|--------|----------|---------|----------|----------|-----------|-----------|---------|
| a            | 3411111      | g            | 3540285      | s                          | g                                    | clone D                    | ++                         | g                 | g   | g   | g       | g     | g        | g        | g    | g  | a      | a     | g       | g    | g     | g    | g     | g      | g        |         |          |          | g         | g         |         |
| g            | 3411129      | a            | 3540303      | s                          | a                                    | clone D                    | ++                         | a                 | g   | a   | a       | a     | g        | g        | g    | g  | g      | g     | g       | g    | g     | g    | g     | g      | g        | g       |          |          |           | g         | g       |
| g            | 3411213      | a            | 3540387      | s                          | a                                    | clone D                    | ++                         | a                 | g   | a   | a       | a     | g        | g        | a    | a  | g      | g     | g       | a    | g     | g    | g     | g      | g        | g       |          |          |           | g         | g       |
| g            | 3411222      | t            | 3540396      | s                          | t                                    | clone D                    | ++                         | t                 | g   | t   | t       | t     | g        | t        | t    | t  | t      | g     | t       | t    | t     | t    | t     | g      | g        | t       |          |          |           | t         | t       |
| a            | 3411235      | g            | 3540409      | ns                         | a                                    | CFT073                     | ++                         | a                 | a   | a   | a       | a     | a        | a        | a    | a  | a      | a     | a       | a    | a     | a    | a     | a      | a        | a       |          |          |           | a         | a       |
| c            | 3411297      | t            | 3540471      | s                          | t                                    | clone D                    | ++                         | t                 | c   | t   | t       | t     | c        | c        | g    | g  | c      | c     | c       | c    | c     | c    | c     | c      | c        | c       |          |          |           | c         | c       |
| c            | 3411312      | a            | 3540486      | s                          | a                                    | clone D                    | ++                         | a                 | c   | a   | a       | a     | c        | c        | a    | a  | a      | c     | c       | c    | c     | c    | c     | a      | a        | a       |          |          |           | a         | a       |
| a            | 3411407      | g            | 3540581      | s                          | g                                    | clone D                    | ++                         | g                 | a   | g   | g       | g     | a        | g        | a    | a  | a      | a     | g       | g    | g     | g    | g     | a      | a        | a       |          |          |           | a         | a       |
| t            | 3411408      | c            | 3540582      | s                          | c                                    | clone D                    | ++                         | c                 | t   | c   | c       | c     | t        | c        | t    | t  | t      | t     | t       | c    | c     | c    | c     | t      | t        | t       |          |          |           | t         | t       |
| a            | 3411471      | g            | 3540645      | s                          | g                                    | clone D                    | ++                         | g                 | a   | g   | g       | g     | a        | g        | g    | g  | a      | a     | g       | g    | g     | g    | g     | a      | g        | g       |          |          |           | g         | g       |
| t            | 3411479      | a            | 3540653      | ns                         | a                                    | clone D                    | ++                         | a                 | t   | a   | a       | a     | t        | a        | a    | a  | t      | t     | a       | a    | a     | a    | a     | t      | a        | a       |          |          |           | a         | a       |
| t            | 3411486      | c            | 3540660      | s                          | c                                    | clone D                    | ++                         | c                 | t   | c   | c       | c     | t        | c        | c    | c  | t      | t     | c       | c    | c     | c    | c     | t      | c        | c       |          |          |           | c         | c       |
| a            | 3411525      | g            | 3540699      | s                          | g                                    | clone D                    | ++                         | g                 | a   | g   | g       | g     | c        | g        | g    | g  | a      | a     | g       | g    | g     | g    | a     | g      | g        |         |          |          | g         | g         |         |
| c            | 3411528      | a            | 3540702      | s                          | a                                    | clone D                    | ++                         | a                 | c   | a   | a       | a     | c        | a        | a    | a  | c      | c     | a       | a    | a     | a    | c     | a      | a        |         |          |          | a         | a         |         |
| a            | 3411594      | g            | 3540768      | s                          | g                                    | clone D                    | ++                         | g                 | g   | g   | g       | g     | g        | g        | g    | g  | g      | a     | g       | g    | g     | g    | g     | g      | g        |         |          |          | g         | g         |         |
| g            | 3411699      | a            | 3540873      | s                          | a                                    | clone D                    | ++                         | a                 | g   | a   | a       | a     | g        | g        | g    | g  | g      | g     | g       | g    | g     | g    | g     | g      | g        |         |          |          | g         | g         |         |
| t            | 3411704      | c            | 3540878      | ns                         | c                                    | clone D                    | ++                         | c                 | c   | c   | c       | c     | c        | c        | c    | c  | t      | t     | c       | c    | c     | c    | t     | c      | c        |         |          |          | c         | c         |         |
| a            | 3411720      | g            | 3540894      | s                          | g                                    | clone D                    | ++                         | g                 | g   | g   | g       | g     | g        | g        | g    | g  | g      | a     | g       | g    | g     | g    | a     | g      | g        |         |          |          | g         | g         |         |
| t            | 3411738      | c            | 3540912      | s                          | t                                    | CFT073                     | ++                         | t                 | t   | c   | c       | c     | t        | c        | c    | c  | c      | t     | c       | c    | c     | c    | t     | c      | c        |         |          |          | c         | c         |         |
| c            | 3411780      | t            | 3540954      | s                          | c                                    | CFT073                     | ++                         | c                 | c   | t   | t       | t     | c        | c        | c    | c  | c      | c     | c       | c    | c     | c    | c     | c      | c        |         |          |          | c         | c         |         |
| a            | 3411813      | c            | 3540987      | s                          | c                                    | clone D                    | ++                         | c                 | a   | c   | c       | c     | c        | c        | c    | c  | c      | a     | c       | c    | c     | c    | a     | a      | a        |         |          |          | a         | a         |         |
| a            | 3411894      | g            | 3541068      | s                          | a                                    | CFT073                     | ++                         | a                 | a   | g   | g       | g     | g        | g        | g    | g  | a      | a     | g       | g    | g     | g    | a     | g      | g        |         |          |          | g         | g         |         |
| g            | 3412028      | a            | 3541202      | s                          | g                                    | CFT073                     | ++                         | g                 | g   | a   | a       | a     | g        | g        | g    | g  | a      | g     | g       | g    | g     | g    | g     | g      | g        |         |          |          | a         | a         |         |
| c            | 3412100      | t            | 3541274      | s                          | c                                    | CFT073                     | ++                         | c                 | c   | t   | t       | t     | t        | c        | c    | c  | t      | c     | c       | c    | c     | c    | c     | c      | c        |         |          |          | c         | c         |         |
| a            | 3412103      | t            | 3541277      | s                          | a                                    | CFT073                     | ++                         | a                 | a   | t   | t       | t     | t        | a        | a    | a  | t      | a     | a       | a    | a     | a    | a     | a      | a        |         |          |          | a         | a         |         |
| a            | 3412208      | g            | 3541382      | s                          | g                                    | clone D                    | ++                         | g                 | g   | g   | g       | g     | g        | g        | g    | g  | a      | a     | g       | g    | g     | g    | g     | g      | g        |         |          |          | g         | g         |         |
| c            | 3412274      | t            | 3541448      | s                          | t                                    | clone D                    | ++                         | t                 | c   | t   | t       | t     | t        | c        | c    | c  | c      | c     | c       | c    | c     | c    | c     | c      | c        |         |          |          | c         | c         |         |
| g            | 3412367      | a            | 3541541      | s                          | g                                    | CFT073                     | ++                         | g                 | g   | g   | g       | g     | g        | a        | a    | a  | g      | g     | a       | a    | a     | a    | g     | a      | a        |         |          |          | a         | a         |         |

| Clone D base | Clone D site | CFT 073 base | CFT 073 site | mutation type <sup>a</sup> | Inferred ancestral base <sup>b</sup> | lineage inferred to mutate | Support level <sup>c</sup> | ED1a <sup>d</sup> | 536 | S88 | APEC O1 | UT189 | E2348/69 | ATCC8739 | K-12 | HS | SMS3-5 | IAI39 | E24377A | SE11 | 55989 | IAI1 | Sakai | UMN026 | B4 Sb227 | F5 8401 | SS Ss046 | D1 Sd197 | B18 BS512 | F2a 2457T | F2a 301 |
|--------------|--------------|--------------|--------------|----------------------------|--------------------------------------|----------------------------|----------------------------|-------------------|-----|-----|---------|-------|----------|----------|------|----|--------|-------|---------|------|-------|------|-------|--------|----------|---------|----------|----------|-----------|-----------|---------|
| c            | 3412421      | g            | 3541595      | s                          | g                                    | clone D                    | ++                         | g                 | c   | g   | g       | g     | g        | g        | g    | g  | g      | c     | g       | g    | g     | g    | g     | g      | g        | g       |          |          |           | g         | g       |
| g            | 3412427      | a            | 3541601      | s                          | g                                    | CFT073                     | ++                         | g                 | g   | g   | g       | g     | g        | a        | a    | a  | g      | g     | a       | a    | a     | a    |       | g      |          | a       |          |          |           | a         | a       |
| t            | 3412430      | c            | 3541604      | s                          | c                                    | clone D                    | ++                         | c                 | t   | c   | c       | c     | c        | c        | c    | c  | c      | t     | c       | c    | c     | c    | c     | c      | c        | c       | c        |          |           | c         | c       |
| a            | 3412448      | g            | 3541622      | s                          | g                                    | clone D                    | ++                         | g                 | a   | g   | g       | g     | g        | g        | g    | g  | g      | a     | g       | g    | g     | g    |       | g      |          | g       |          |          | g         | g         |         |
| a            | 3412466      | g            | 3541640      | s                          | g                                    | clone D                    | ++                         | g                 | a   | g   | g       | g     | g        | g        | g    | g  | g      | a     | g       | g    | g     | g    |       | g      |          | g       |          |          | g         | g         |         |
| g            | 3412469      | a            | 3541643      | s                          | a                                    | clone D                    | ++                         | a                 | g   | a   | a       | a     | a        | a        | a    | a  | a      | g     | a       | a    | a     | a    |       | a      |          | a       |          |          | a         | a         |         |
| c            | 3412472      | t            | 3541646      | s                          | t                                    | clone D                    | ++                         | t                 | c   | t   | t       | t     | t        | t        | t    | t  | t      | c     | t       | t    | t     | t    |       | t      |          | t       |          |          | t         | t         |         |
| c            | 3412475      | t            | 3541649      | s                          | t                                    | clone D                    | ++                         | t                 | c   | t   | t       | t     | t        | t        | t    | t  | t      | c     | t       | t    | t     | t    |       | t      |          | t       |          |          | t         | t         |         |
| t            | 3412478      | c            | 3541652      | s                          | c                                    | clone D                    | ++                         | c                 | t   | c   | c       | c     | c        | c        | c    | c  | c      | t     | c       | c    | c     | c    |       | c      |          | c       |          |          | c         | c         |         |
| t            | 3412487      | c            | 3541661      | s                          | c                                    | clone D                    | ++                         | c                 | g   | c   | c       | c     | c        | c        | c    | c  | c      | t     | c       | c    | c     | c    |       | c      |          | c       |          |          | c         | c         |         |
| g            | 3412490      | a            | 3541664      | s                          | a                                    | clone D                    | ++                         | a                 | g   | a   | a       | a     | a        | a        | a    | a  | a      | g     | a       | a    | a     | a    |       | a      |          | a       |          |          | a         | a         |         |
| c            | 3412493      | t            | 3541667      | s                          | t                                    | clone D                    | ++                         | t                 | c   | t   | t       | t     | t        | t        | t    | t  | t      | c     | t       | t    | t     | t    |       | t      |          | t       |          |          | t         | t         |         |
| g            | 3412499      | a            | 3541673      | s                          | a                                    | clone D                    | ++                         | a                 | g   | a   | a       | a     | a        | a        | a    | a  | a      | g     | a       | a    | a     | a    |       | a      |          | a       |          |          | a         | a         |         |
| c            | 3412631      | t            | 3541805      | s                          | t                                    | clone D                    | ++                         | t                 | c   | t   | t       | t     | t        | t        | t    | t  | t      | c     | t       | t    | t     | t    |       | t      |          | t       |          |          | t         | t         |         |
| t            | 3412634      | c            | 3541808      | s                          | c                                    | clone D                    | ++                         | c                 | t   | c   | c       | c     | c        | c        | c    | c  | c      | t     | c       | c    | c     | c    |       | c      |          | c       |          |          | c         | c         |         |
| a            | 3412649      | g            | 3541823      | s                          | a                                    | CFT073                     | ++                         | a                 | a   | a   | a       | a     | a        | g        | g    | g  | a      | a     | g       | g    | g     | g    |       | g      |          | g       |          |          | g         | g         |         |
| t            | 3412670      | a            | 3541844      | s                          | a                                    | clone D                    | ++                         | a                 | t   | a   | a       | a     | a        | a        | a    | a  | a      | t     | a       | a    | a     | a    |       | a      |          | a       |          |          | a         | a         |         |
| a            | 3412685      | c            | 3541859      | s                          | c                                    | clone D                    | ++                         | c                 | c   | c   | c       | c     | c        | c        | c    | c  | c      | a     | c       | c    | c     | c    |       | t      |          | c       |          |          | c         | c         |         |
| c            | 3412799      | a            | 3541973      | s                          | a                                    | clone D                    | ++                         | a                 | a   | a   | a       | a     | a        | a        | a    | a  | c      | c     | a       | a    | a     | a    |       | a      |          | a       |          |          | a         | a         |         |
| a            | 3412834      | c            | 3542008      | ns                         | c                                    | clone D                    | ++                         | c                 | c   | c   | c       | c     | c        | c        | c    | c  | c      | a     | c       | c    | c     | c    |       | c      |          | c       |          |          | c         | c         |         |
| a            | 3412877      | g            | 3542051      | s                          | a                                    | CFT073                     | ++                         | a                 | g   | a   | a       | a     | a        | g        | g    | g  | a      | a     | g       | g    | g     | g    |       | g      |          | g       |          |          | g         | g         |         |
| c            | 3412904      | t            | 3542078      | s                          | c                                    | CFT073                     | ++                         | c                 | c   | c   | c       | c     | c        | t        | t    | t  | c      | c     | t       | t    | t     | t    |       | c      |          | t       |          |          | t         | t         |         |
| c            | 3412925      | a            | 3542099      | s                          | c                                    | CFT073                     | ++                         | c                 | c   | c   | c       | c     | c        | c        | a    | c  | c      | c     | c       | c    | c     | c    |       | c      |          | c       |          |          | c         | c         |         |
| c            | 3412934      | t            | 3542108      | s                          | c                                    | CFT073                     | ++                         | c                 | c   | c   | c       | c     | c        | t        | t    | t  | c      | c     | c       | c    | c     | c    |       | c      |          | c       |          |          | c         | c         |         |
| a            | 3412943      | g            | 3542117      | s                          | a                                    | CFT073                     | ++                         | a                 | g   | a   | a       | a     | a        | g        | g    | g  | g      | a     | g       | g    | g     | g    |       | g      |          | g       |          |          | g         | g         |         |
| t            | 3412985      | c            | 3542159      | s                          | t                                    | CFT073                     | ++                         | t                 | c   | t   | t       | t     | t        | c        | c    | c  | t      | t     | c       | c    | c     | c    |       | c      |          | c       |          |          | c         | c         |         |
| a            | 3413006      | g            | 3542180      | s                          | a                                    | CFT073                     | ++                         | a                 | g   | a   | a       | a     | a        | g        | g    | g  | a      | a     | g       | g    | g     | g    |       | g      |          | g       |          |          | g         | g         |         |
| a            | 3413012      | g            | 3542186      | s                          | a                                    | CFT073                     | ++                         | a                 | a   | a   | a       | a     | a        | g        | g    | g  | a      | a     | a       | g    | a     | g    |       | a      |          | a       |          |          | a         | a         |         |



| Clone D base | Clone D site | CFT 073 base | CFT 073 site | mutation type <sup>a</sup> | Inferred ancestral base <sup>b</sup> | lineage inferred to mutate | Support level <sup>c</sup> | ED1a <sup>d</sup> | 536 | S88 | APEC O1 | UT189 | E2348/69 | ATCC8739 | K-12 | HS | SMS3-5 | IAI39 | E24377A | SE11 | 55989 | IAI1 | Sakai | UMN026 | B4 Sb227 | F5 8401 | SS Ss046 | D1 Sd197 | B18 BS512 | F2a 2457T | F2a 301 |
|--------------|--------------|--------------|--------------|----------------------------|--------------------------------------|----------------------------|----------------------------|-------------------|-----|-----|---------|-------|----------|----------|------|----|--------|-------|---------|------|-------|------|-------|--------|----------|---------|----------|----------|-----------|-----------|---------|
| a            | 3414689      | g            | 3543863      | s                          | g                                    | clone D                    | ++                         | g                 | a   | g   | g       | g     | g        | g        | g    | g  | g      | a     | g       | g    | g     | g    | g     | g      | g        | g       |          |          | g         | g         |         |
| c            | 3414729      | g            | 3543903      | ns                         | c                                    | CFT073                     | ++                         | c                 | c   | c   | c       | c     | c        | g        | g    | g  | c      | c     | c       | g    | g     | g    | c     | c      | g        | g       | g        |          |           | g         | g       |
| t            | 3414777      | c            | 3543951      | s                          | c                                    | clone D                    | ++                         | c                 | t   | c   | c       | c     | c        | c        | c    | c  | t      | t     | c       | c    | c     | c    | c     | t      | c        | c       | c        |          |           | c         | c       |
| t            | 3414852      | c            | 3544026      | ns                         | c                                    | clone D                    | ++                         | c                 | t   | c   | c       | c     | c        | c        | c    | c  | t      | t     | c       | c    | c     | c    | c     | t      | a        | a       | a        |          |           | a         | a       |
| g            | 3414900      | a            | 3544074      | ns                         | g                                    | CFT073                     | ++                         | g                 | g   | g   | g       | g     | g        | a        | a    | a  | g      | g     | g       | a    | a     | a    | a     | g      | g        | g       | g        |          |           | g         | g       |
| g            | 3414936      | a            | 3544110      | ns                         | a                                    | clone D                    | ++                         | a                 | a   | a   | a       | a     | a        | a        | a    | a  | g      | g     | a       | a    | a     | a    | a     | a      | g        | g       | g        |          |           | g         | g       |
| a            | 3415002      | g            | 3544176      | ns                         | a                                    | CFT073                     | ++                         | a                 | g   | a   | a       | a     | a        | g        | g    | g  | g      | a     | g       | g    | g     | g    | g     | g      | g        | g       | g        |          |           | g         | g       |
| g            | 3415047      | a            | 3544221      | ns                         | g                                    | CFT073                     | ++                         | g                 | g   | g   | g       | g     | g        | a        | a    | a  | a      | g     | a       | a    | a     | a    | a     | g      | a        | a       | a        |          |           | a         | a       |
| c            | 3415074      | t            | 3544248      | ns                         | t                                    | clone D                    | ++                         | t                 | c   | t   | t       | t     | t        | t        | t    | t  | t      | c     | t       | t    | t     | t    | c     | t      | c        | t       | t        |          |           | t         | t       |
| a            | 3415077      | g            | 3544251      | ns                         | g                                    | clone D                    | ++                         | g                 | a   | g   | g       | g     | g        | g        | g    | g  | g      | a     | g       | g    | g     | g    | a     | g      | g        | g       | g        |          |           | g         | g       |
| a            | 3415175      | g            | 3544349      | s                          | g                                    | clone D                    | ++                         | g                 | a   | g   | g       | g     | g        | g        | g    | g  | a      | a     | g       | g    | g     | g    | g     | a      | g        | g       | g        |          |           | g         | g       |
| a            | 3415206      | g            | 3544380      | ns                         | g                                    | clone D                    | ++                         | g                 | a   | g   | g       | g     | g        | g        | g    | g  | g      | a     | g       | g    | g     | g    | g     | a      | g        | g       | g        |          |           | g         | g       |
| c            | 3415212      | t            | 3544386      | ns                         | t                                    | clone D                    | ++                         | t                 | c   | t   | t       | t     | t        | t        | t    | t  | t      | c     | t       | t    | t     | t    | c     | t      | c        | t       | t        |          |           | t         | t       |
| a            | 3415236      | g            | 3544410      | ns                         | g                                    | clone D                    | ++                         | g                 | a   | g   | g       | g     | g        | g        | g    | g  | a      | a     | g       | g    | g     | g    | a     | g      | g        | g       | g        |          |           | g         | g       |
| g            | 3415239      | a            | 3544413      | ns                         | a                                    | clone D                    | ++                         | a                 | g   | a   | a       | a     | a        | a        | a    | a  | g      | g     | a       | a    | a     | a    | a     | g      | a        | a       | a        |          |           | a         | a       |
| t            | 3415672      | g            | 3544846      | ns                         | ?                                    | ?                          | +/-                        | -                 | g   | -   | -       | -     | g        | g        |      | g  | g      | -     | -       | -    | -     | -    | g     | -      | -        | -       | -        |          |           | -         | -       |
| c            | 3415673      | t            | 3544847      | ns                         | ?                                    | ?                          | +/-                        | -                 | t   | -   | -       | -     | t        | t        |      | t  | t      | -     | -       | -    | -     | -    | t     | -      | -        | -       | -        |          |           | -         | -       |
| a            | 3415681      | g            | 3544860      | nc                         | a                                    | CFT073                     | ++                         | a                 | g   | a   | a       | a     | g        | g        |      | g  | g      | a     | a       | a    | a     | a    | g     | a      | a        | a       | a        |          |           | a         | a       |
| a            | 3415698      | g            | 3544877      | nc                         | g                                    | clone D                    | ++                         | g                 | g   | g   | g       | g     | g        | g        |      | g  | g      | a     | g       | g    | g     | g    | g     | g      | g        | g       | g        |          |           | g         | g       |
| a            | 3415702      | c            | 3544881      | nc                         | a                                    | CFT073                     | ++                         | a                 | c   | a   | a       | a     | c        | c        |      | c  | c      | a     | a       | a    | a     | a    | c     | a      | a        | a       | a        |          |           | a         | a       |
| t            | 3415731      | c            | 3544910      | nc                         | t                                    | CFT073                     | ++                         | t                 | c   | t   | t       | t     | c        | c        |      | c  | c      | t     | c       | c    | c     | c    | c     | c      | t        | t       | t        |          |           | t         | t       |
| a            | 3415745      | c            | 3544924      | nc                         | c                                    | clone D                    | ++                         | c                 | c   | c   | c       | c     | c        | c        |      | c  | c      | a     | c       | c    | c     | c    | c     | c      | t        | t       | t        |          |           | t         | t       |
| c            | 3415747      | a            | 3544926      | nc                         | a                                    | clone D                    | ++                         | a                 | a   | a   | a       | a     | a        | a        |      | a  | a      | c     | a       | a    | a     | a    | a     | a      | a        | a       | a        |          |           | a         | a       |
| a            | 3415759      | c            | 3544938      | nc                         | c                                    | clone D                    | ++                         | c                 | c   | c   | c       | c     | c        | c        |      | c  | c      | a     | c       | c    | c     | c    | c     | c      | c        | c       | c        |          |           | c         | c       |
| t            | 3415760      | g            | 3544939      | nc                         | ?                                    | ?                          | +/-                        | a                 | g   | a   | a       | a     | g        | g        |      | g  | a      | t     | a       | a    | a     | a    | a     | a      | g        | g       | g        |          |           | g         | g       |
| a            | 3415762      | c            | 3544941      | nc                         | a                                    | CFT073                     | ++                         | a                 | c   | a   | a       | a     | c        | c        |      | c  | c      | a     | a       | a    | a     | a    | a     | a      | c        | c       | c        |          |           | c         | c       |
| t            | 3415772      | g            | 3544951      | nc                         | g                                    | clone D                    | ++                         | g                 | g   | g   | g       | g     | g        | g        |      | g  | g      | t     | g       | g    | g     | g    | g     | g      | g        | g       | g        |          |           | g         | g       |
| a            | 3415796      | g            | 3544975      | nc                         | g                                    | clone D                    | ++                         | g                 | g   | g   | g       | g     | g        | g        |      | g  | g      | a     | g       | g    | g     | g    | a     | g      | g        | g       | g        |          |           | g         | g       |

| Clone D base | Clone D site | CFT 073 base | CFT 073 site | mutation type <sup>a</sup> | Inferred ancestral base <sup>b</sup> | lineage inferred to mutate | Support level <sup>c</sup> | ED1a <sup>d</sup> | 536 | S88 | APEC O1 | UT189 | E2348/69 | ATCC8739 | K-12 | HS | SMS3-5 | IAI39 | E24377A | SE11 | 55989 | IAI1 | Sakai | UMN026 | B4 Sb227 | F5 8401 | SS Ss046 | D1 Sd197 | B18 BS512 | F2a 2457T | F2a 301 |
|--------------|--------------|--------------|--------------|----------------------------|--------------------------------------|----------------------------|----------------------------|-------------------|-----|-----|---------|-------|----------|----------|------|----|--------|-------|---------|------|-------|------|-------|--------|----------|---------|----------|----------|-----------|-----------|---------|
| c            | 3415800      | g            | 3544979      | nc                         | g                                    | clone D                    | ++                         | g                 | g   | a   | a       | a     | g        | g        | g    | g  | c      | g     | g       | g    | g     | g    | g     | g      | g        |         |          |          | g         | g         |         |
| c            | 3415803      | a            | 3544982      | nc                         | a                                    | clone D                    | ++                         | a                 | a   | a   | a       | a     | a        | a        | a    | a  | c      | a     | a       | a    | a     | a    | a     | a      | g        |         |          |          | g         | g         |         |
| g            | 3415808      | a            | 3544987      | nc                         | a                                    | clone D                    | ++                         | a                 | a   | a   | a       | a     | a        | a        | a    | a  | g      | a     | a       | a    | a     | a    | a     | a      | a        | a       |          |          |           | a         | a       |
| a            | 3415809      | c            | 3544988      | nc                         | c                                    | clone D                    | ++                         | c                 | c   | c   | c       | c     | c        | c        | c    | c  | a      | c     | c       | c    | c     | c    | c     | c      | c        | c       |          |          |           | c         | c       |
| a            | 3415831      | g            | 3545010      | nc                         | g                                    | clone D                    | ++                         | g                 | g   | g   | g       | g     | g        | g        | g    | g  | a      | g     | g       | g    | g     | g    | g     | g      | g        | g       |          |          |           | g         | g       |
| g            | 3415832      | t            | 3545011      | nc                         | t                                    | clone D                    | ++                         | t                 | t   | t   | t       | t     | t        | t        | t    | t  | g      | t     | t       | t    | t     | t    | t     | t      | t        | t       |          |          |           | t         | t       |
| t            | 3415841      | g            | 3545020      | nc                         | g                                    | clone D                    | ++                         | g                 | g   | g   | g       | g     | g        | g        | g    | g  | t      | g     | g       | g    | g     | g    | g     | g      | g        | g       |          |          |           | g         | g       |
| g            | 3415845      | a            | 3545024      | nc                         | a                                    | clone D                    | ++                         | a                 | a   | a   | a       | a     | a        | a        | a    | a  | g      | a     | a       | a    | a     | a    | a     | a      | a        | a       |          |          |           | a         | a       |
| t            | 3415846      | c            | 3545025      | nc                         | c                                    | clone D                    | ++                         | c                 | c   | c   | c       | c     | c        | c        | c    | c  | t      | c     | c       | c    | c     | c    | c     | c      | c        | c       |          |          |           | c         | c       |
| a            | 3415848      | g            | 3545027      | nc                         | g                                    | clone D                    | ++                         | g                 | g   | g   | g       | g     | g        | g        | g    | g  | a      | g     | g       | g    | g     | g    | g     | g      | g        | g       |          |          |           | g         | g       |
| t            | 3415856      | c            | 3545035      | nc                         | c                                    | clone D                    | ++                         | c                 | c   | c   | c       | c     | c        | c        | c    | c  | t      | c     | c       | c    | c     | c    | c     | c      | c        | c       |          |          |           | c         | c       |
| c            | 3415858      | t            | 3545037      | nc                         | c                                    | CFT073                     | ++                         | c                 | t   | c   | c       | c     | t        | t        | t    | c  | c      | t     | t       | t    | t     | t    | t     | t      | t        | t       |          |          |           | t         | t       |
| a            | 3415859      | c            | 3545038      | nc                         | c                                    | clone D                    | ++                         | c                 | c   | c   | c       | c     | c        | c        | c    | c  | a      | c     | c       | c    | c     | c    | c     | c      | c        | c       |          |          |           | c         | c       |
| c            | 3415869      | t            | 3545048      | nc                         | t                                    | clone D                    | ++                         | t                 | t   | t   | t       | t     | t        | t        | t    | t  | c      | t     | t       | t    | t     | t    | t     | t      | t        | t       |          |          |           | t         | t       |
| c            | 3415880      | t            | 3545059      | nc                         | t                                    | clone D                    | ++                         | t                 | t   | t   | t       | t     | t        | t        | t    | t  | c      | t     | t       | t    | t     | t    | t     | t      | t        | t       |          |          |           | t         | t       |
| c            | 3415905      | a            | 3545084      | nc                         | a                                    | clone D                    | ++                         | a                 | a   | a   | a       | a     | a        | a        | a    | a  | c      | a     | a       | a    | a     | a    | a     | a      | a        | a       |          |          |           | a         | a       |
| a            | 3415911      | t            | 3545090      | nc                         | t                                    | clone D                    | +                          | -                 | t   | -   | -       | -     | t        | t        | t    | t  | a      | t     | t       | t    | t     | t    | t     | t      | t        | t       |          |          |           | t         | t       |
| c            | 3415916      | t            | 3545096      | nc                         | c                                    | CFT073                     | ++                         | c                 | t   | t   | t       | t     | t        | t        | t    | t  | t      | t     | t       | t    | t     | t    | t     | t      | t        | t       |          |          |           | t         | t       |
| t            | 3415917      | c            | 3545097      | nc                         | t                                    | CFT073                     | ++                         | t                 | c   | t   | t       | t     | c        | c        | c    | c  | -      | c     | c       | c    | c     | c    | c     | c      | c        | c       |          |          |           | c         | c       |
| a            | 3415938      | t            | 3545118      | nc                         | t                                    | clone D                    | ++                         | t                 | a   | t   | t       | t     | t        | t        | t    | t  | a      | t     | t       | t    | t     | t    | t     | t      | t        | t       |          |          |           | t         | t       |
| a            | 3415940      | t            | 3545120      | nc                         | t                                    | clone D                    | ++                         | t                 | a   | t   | t       | t     | t        | t        | t    | t  | a      | t     | t       | t    | t     | t    | t     | t      | t        | t       |          |          |           | t         | t       |
| g            | 3415943      | a            | 3545123      | nc                         | a                                    | clone D                    | ++                         | a                 | a   | a   | a       | a     | a        | a        | a    | a  | g      | a     | a       | a    | a     | a    | a     | a      | a        | a       |          |          |           | a         | a       |
| c            | 3415947      | t            | 3545127      | nc                         | c                                    | CFT073                     | ++                         | c                 | c   | c   | c       | c     | t        | t        | t    | t  | c      | c     | c       | c    | c     | c    | c     | c      | c        | c       |          |          |           | c         | c       |
| t            | 3416015      | g            | 3545195      | nc                         | t                                    | CFT073                     | ++                         | t                 | t   | t   | t       | t     | g        | g        | g    | t  | t      | t     | t       | t    | t     | t    | t     | t      | t        | t       |          |          |           | t         | t       |
| g            | 3416100      | t            | 3545280      | s                          | g                                    | CFT073                     | ++                         | g                 | g   | g   | g       | g     | g        | g        | g    | g  | g      | g     | g       | g    | g     | g    | g     | g      | g        | g       |          | g        |           | g         | g       |
| t            | 3416118      | c            | 3545298      | s                          | c                                    | clone D                    | ++                         | c                 | c   | c   | c       | c     | c        | c        | c    | c  | t      | t     | c       | c    | c     | c    | c     | c      | c        | c       |          | c        |           | c         | c       |
| t            | 3416136      | c            | 3545316      | s                          | c                                    | clone D                    | ++                         | c                 | t   | c   | c       | c     | c        | c        | c    | c  | t      | t     | c       | c    | c     | c    | c     | c      | c        | c       |          | c        |           | c         | c       |
| g            | 3416202      | a            | 3545382      | s                          | g                                    | CFT073                     | ++                         | g                 | g   | g   | g       | g     | g        | a        | a    | g  | g      | g     | g       | g    | g     | g    | g     | g      | g        | g       |          | a        |           | g         | g       |



| Clone D base | Clone D site | CFT 073 base | CFT 073 site | mutation type <sup>a</sup> | Inferred ancestral base <sup>b</sup> | lineage inferred to mutate | Support level <sup>c</sup> | ED1a <sup>d</sup> | 536 | S88 | APEC O1 | UT189 | E2348/69 | ATCC8739 | K-12 | HS | SMS3-5 | IAI39 | E24377A | SE11 | 55989 | IAI1 | Sakai | UMN026 | B4 Sb227 | F5 8401 | SS Ss046 | D1 Sd197 | B18 BS512 | F2a 2457T | F2a 301 |
|--------------|--------------|--------------|--------------|----------------------------|--------------------------------------|----------------------------|----------------------------|-------------------|-----|-----|---------|-------|----------|----------|------|----|--------|-------|---------|------|-------|------|-------|--------|----------|---------|----------|----------|-----------|-----------|---------|
| g            | 3416280      | a            | 3545460      | s                          | g                                    | CFT073                     | ++                         | g                 | c   | g   | g       | g     | c        | a        | a    | c  | g      | g     | g       | g    | g     | g    | g     | g      |          |         |          | c        | g         | g         |         |
| g            | 3416288      | a            | 3545468      | ns                         | g                                    | CFT073                     | ++                         | g                 | g   | g   | g       | g     | g        | g        | g    | g  | g      | g     | g       | g    | g     | g    | g     | g      |          |         |          | g        | g         | g         |         |
| t            | 3416292      | c            | 3545472      | s                          | t                                    | CFT073                     | ++                         | t                 | t   | t   | t       | t     | c        | c        | c    | c  | t      | t     | t       | t    | t     | t    | t     | t      |          |         |          | c        | t         | t         |         |
| c            | 3416361      | t            | 3545541      | s                          | c                                    | CFT073                     | +                          | a                 | c   | a   | a       | a     | c        | t        | t    | c  | c      | c     | c       | c    | c     | c    | c     | c      |          |         |          | t        | c         | c         |         |
| c            | 3416389      | t            | 3545569      | s                          | c                                    | CFT073                     | ++                         | c                 | c   | c   | c       | c     | c        | t        | t    | c  | c      | c     | c       | c    | c     | c    | c     | c      |          |         |          | t        | c         | c         |         |
| g            | 3416397      | t            | 3545577      | s                          | t                                    | clone D                    | ++                         | t                 | t   | t   | t       | t     | t        | t        | t    | t  | g      | t     | t       | t    | t     | t    | t     | t      |          |         |          | t        | t         | t         |         |
| a            | 3416473      | g            | 3545653      | ns                         | a                                    | CFT073                     | ++                         | a                 | a   | a   | a       | a     | a        | g        | g    | a  | a      | a     | a       | a    | a     | a    | a     | a      |          |         |          | g        | a         | a         |         |
| t            | 3416478      | c            | 3545658      | s                          | c                                    | clone D                    | ++                         | c                 | t   | c   | c       | c     | c        | c        | c    | c  | c      | t     | c       | c    | c     | c    | c     | c      |          |         |          | c        | c         | c         |         |
| t            | 3416541      | c            | 3545721      | s                          | c                                    | clone D                    | ++                         | c                 | t   | c   | c       | c     | c        | c        | c    | c  | c      | t     | c       | c    | c     | c    | c     | c      |          |         |          | c        | c         | c         |         |
| a            | 3416544      | g            | 3545724      | s                          | g                                    | clone D                    | ++                         | g                 | a   | g   | g       | g     | g        | g        | g    | g  | a      | g     | g       | g    | g     | g    | g     | g      |          |         |          | g        | g         | g         |         |
| a            | 3416556      | g            | 3545736      | s                          | g                                    | clone D                    | ++                         | g                 | a   | a   | a       | a     | a        | g        | g    | g  | a      | g     | g       | g    | g     | g    | g     | g      |          |         |          | g        | g         | g         |         |
| t            | 3416613      | c            | 3545793      | s                          | c                                    | clone D                    | ++                         | c                 | c   | c   | c       | c     | c        | c        | c    | c  | t      | c     | c       | c    | c     | c    | c     | c      |          |         |          | c        | c         | c         |         |
| c            | 3416616      | t            | 3545796      | s                          | t                                    | clone D                    | ++                         | t                 | t   | t   | t       | t     | t        | t        | t    | t  | c      | t     | t       | t    | t     | t    | t     | t      |          |         |          | t        | t         | t         |         |
| t            | 3416619      | c            | 3545799      | s                          | c                                    | clone D                    | ++                         | c                 | c   | c   | c       | c     | c        | c        | c    | c  | c      | t     | c       | c    | c     | c    | c     | c      |          |         |          | c        | c         | c         |         |
| t            | 3416622      | c            | 3545802      | s                          | c                                    | clone D                    | ++                         | c                 | c   | c   | c       | c     | c        | c        | c    | c  | c      | t     | c       | c    | c     | c    | c     | c      |          |         |          | c        | c         | c         |         |
| c            | 3416625      | t            | 3545805      | s                          | t                                    | clone D                    | ++                         | t                 | t   | t   | t       | t     | t        | t        | t    | t  | c      | t     | t       | t    | t     | t    | t     | t      |          |         |          | t        | t         | t         |         |
| t            | 3416664      | c            | 3545844      | s                          | t                                    | CFT073                     | ++                         | t                 | t   | t   | t       | t     | t        | c        | c    | t  | t      | t     | t       | t    | t     | t    | t     | t      |          |         |          | t        | t         | t         |         |
| g            | 3416667      | c            | 3545847      | s                          | c                                    | clone D                    | ++                         | c                 | c   | g   | g       | g     | c        | c        | c    | c  | g      | c     | c       | c    | c     | c    | c     | c      |          |         |          | c        | c         | c         |         |
| t            | 3416841      | c            | 3546021      | s                          | t                                    | CFT073                     | ++                         | t                 | c   | t   | t       | t     | c        | c        | c    | c  | c      | c     | c       | c    | c     | c    | c     | c      |          |         |          | c        | c         | c         |         |
| a            | 3416859      | g            | 3546039      | s                          | a                                    | CFT073                     | ++                         | a                 | g   | a   | a       | a     | a        | g        | g    | g  | g      | g     | g       | g    | g     | g    | g     | g      |          |         |          | g        | g         | g         |         |
| c            | 3416952      | t            | 3546132      | s                          | c                                    | CFT073                     | ++                         | c                 | t   | c   | c       | c     | a        | t        | t    | t  | t      | t     | t       | t    | t     | t    | t     | c      |          |         |          | t        | t         | t         |         |
| a            | 3416964      | c            | 3546144      | s                          | a                                    | CFT073                     | ++                         | a                 | c   | a   | a       | a     | c        | c        | c    | c  | c      | c     | c       | c    | c     | c    | c     | c      |          |         |          | c        | c         | c         |         |
| g            | 3417019      | a            | 3546199      | ns                         | g                                    | CFT073                     | ++                         | g                 | g   | g   | g       | g     | g        | a        | g    | g  | g      | g     | g       | g    | g     | g    | g     | g      |          |         |          | a        | a         | a         |         |
| g            | 3417089      | c            | 3546269      | ns                         | g                                    | CFT073                     | ++                         | g                 | c   | g   | g       | g     | g        | c        | c    | c  | c      | c     | c       | c    | c     | c    | c     | c      |          |         |          | c        | c         | c         |         |
| c            | 3417132      | t            | 3546312      | s                          | c                                    | CFT073                     | ++                         | c                 | t   | c   | c       | c     | c        | t        | t    | t  | c      | t     | t       | t    | t     | t    | t     | t      |          |         |          | t        | t         | t         |         |
| t            | 3417159      | a            | 3546339      | s                          | t                                    | CFT073                     | ++                         | t                 | t   | t   | t       | t     | t        | a        | a    | t  | t      | t     | t       | t    | t     | t    | t     | t      |          |         |          | a        | a         | a         |         |
| a            | 3417162      | g            | 3546342      | s                          | a                                    | CFT073                     | ++                         | a                 | a   | a   | a       | a     | a        | g        | g    | a  | a      | a     | a       | a    | a     | a    | a     | a      |          |         |          | g        | g         | g         |         |
| t            | 3417195      | c            | 3546375      | s                          | t                                    | CFT073                     | ++                         | t                 | t   | t   | t       | t     | t        | c        | c    | t  | t      | c     | c       | c    | c     | c    | c     | t      |          |         |          | c        | c         | c         |         |





| Clone D base | Clone D site | CFT 073 base | CFT 073 site | mutation type <sup>a</sup> | Inferred ancestral base <sup>b</sup> | lineage inferred to mutate | Support level <sup>c</sup> | ED1a <sup>d</sup> | 536 | S88 | APEC O1 | UT189 | E2348/69 | ATCC8739 | K-12 | HS | SMS3-5 | IAI39 | E24377A | SE11 | 55989 | IAI1 | Sakai | UMN026 | B4 Sb227 | F5 8401 | SS Ss046 | D1 Sd197 | B18 BS512 | F2a 2457T | F2a 301 |
|--------------|--------------|--------------|--------------|----------------------------|--------------------------------------|----------------------------|----------------------------|-------------------|-----|-----|---------|-------|----------|----------|------|----|--------|-------|---------|------|-------|------|-------|--------|----------|---------|----------|----------|-----------|-----------|---------|
| g            | 3418541      | t            | 3547721      | s                          | g                                    | CFT073                     | ++                         | g                 | t   | g   | g       | g     | t        | t        | t    | g  | g      | t     | t       | t    | t     | t    | t     |        |          |         |          | t        | t         | t         |         |
| t            | 3418550      | c            | 3547730      | s                          | t                                    | CFT073                     | ++                         | t                 | c   | t   | t       | t     | c        | c        | c    | t  | t      | c     | c       | c    | c     | c    | c     | c      |          |         |          | c        | c         | c         |         |
| t            | 3418553      | c            | 3547733      | s                          | t                                    | CFT073                     | ++                         | t                 | c   | t   | t       | t     | c        | c        | c    | t  | t      | c     | c       | c    | c     | c    | c     | c      |          |         |          | c        | c         | c         |         |
| c            | 3418562      | t            | 3547742      | s                          | c                                    | CFT073                     | ++                         | c                 | t   | c   | c       | c     | t        | t        | t    | c  | c      | c     | t       | t    | t     | t    | c     | c      |          |         |          | t        | t         | t         |         |
| t            | 3418574      | c            | 3547754      | s                          | c                                    | clone D                    | ++                         | c                 | c   | c   | c       | c     | c        | c        | c    | c  | c      | c     | c       | c    | c     | c    | c     | c      |          |         |          | c        | c         | c         |         |
| t            | 3418577      | c            | 3547757      | s                          | t                                    | CFT073                     | ++                         | t                 | c   | t   | t       | t     | c        | c        | c    | t  | t      | c     | c       | c    | c     | c    | c     | c      |          |         |          | c        | c         | c         |         |
| t            | 3418946      | a            | 3548126      | ns                         | a                                    | clone D                    | ++                         | a                 | a   | a   | a       | a     | a        | a        | a    | a  | a      | a     | a       | a    | a     | a    | a     | a      |          |         |          |          |           | a         | a       |
| a            | 3419024      | g            | 3548204      | s                          | a                                    | CFT073                     | ++                         | a                 | g   | a   | a       | a     | a        | g        | g    | g  | g      | g     | g       | g    | g     | g    | g     | g      |          |         |          |          |           | g         | g       |
| a            | 3419075      | c            | 3548255      | s                          | c                                    | clone D                    | ++                         | c                 | c   | c   | c       | c     | c        | c        | c    | c  | c      | c     | c       | c    | c     | c    | c     | c      |          |         |          |          |           | c         | c       |
| t            | 3419138      | c            | 3548318      | s                          | t                                    | CFT073                     | ++                         | t                 | c   | t   | t       | t     | t        | c        | c    | c  | c      | c     | c       | c    | c     | c    | c     | c      |          |         |          |          |           | c         | c       |
| c            | 3419142      | a            | 3548322      | ns                         | c                                    | CFT073                     | ++                         | c                 | g   | c   | c       | c     | c        | a        | g    | g  | g      | a     | a       | a    | a     | a    | a     | g      |          |         |          |          |           | a         | a       |
| a            | 3419156      | c            | 3548336      | s                          | a                                    | CFT073                     | ++                         | a                 | a   | a   | a       | a     | a        | c        | a    | a  | a      | a     | c       | c    | c     | c    | a     | a      |          |         |          |          |           | c         | c       |
| c            | 3419174      | t            | 3548354      | s                          | c                                    | CFT073                     | ++                         | c                 | c   | c   | c       | c     | c        | t        | c    | c  | c      | c     | c       | t    | t     | t    | c     | c      |          |         |          |          |           | c         | c       |
| t            | 3419177      | c            | 3548357      | s                          | c                                    | clone D                    | ++                         | c                 | c   | c   | c       | c     | t        | c        | c    | c  | c      | c     | c       | c    | c     | c    | c     | c      |          |         |          |          |           | c         | c       |
| a            | 3419216      | g            | 3548396      | s                          | g                                    | clone D                    | ++                         | g                 | g   | g   | g       | g     | g        | g        | g    | g  | g      | g     | g       | g    | g     | g    | g     | g      |          |         |          |          |           | g         | g       |
| t            | 3419222      | c            | 3548402      | s                          | t                                    | CFT073                     | ++                         | t                 | c   | t   | t       | t     | t        | c        | c    | t  | c      | c     | c       | c    | c     | c    | c     | t      |          |         |          |          |           | c         | c       |
| a            | 3419226      | g            | 3548406      | ns                         | g                                    | clone D                    | ++                         | g                 | g   | g   | g       | g     | g        | g        | g    | g  | g      | g     | g       | g    | g     | g    | g     | g      |          |         |          |          |           | g         | g       |
| t            | 3419306      | c            | 3548486      | s                          | c                                    | clone D                    | ++                         | c                 | c   | c   | c       | c     | c        | c        | c    | c  | c      | c     | c       | c    | c     | c    | c     | c      |          |         |          |          |           | c         | c       |
| c            | 3419393      | t            | 3548573      | s                          | c                                    | CFT073                     | ++                         | c                 | t   | c   | c       | c     | c        | t        | t    | t  | t      | t     | t       | t    | t     | t    | t     | t      |          |         |          |          |           | t         | t       |
| g            | 3419402      | a            | 3548582      | s                          | g                                    | CFT073                     | ++                         | g                 | a   | g   | g       | g     | g        | a        | a    | a  | a      | a     | a       | a    | a     | a    | a     | a      |          |         |          |          |           | a         | a       |
| t            | 3419423      | c            | 3548603      | s                          | t                                    | CFT073                     | ++                         | t                 | c   | t   | t       | t     | t        | c        | c    | c  | c      | c     | c       | c    | c     | c    | c     | c      |          |         |          |          |           | c         | c       |
| c            | 3419426      | t            | 3548606      | s                          | c                                    | CFT073                     | ++                         | c                 | t   | c   | c       | c     | c        | t        | t    | t  | t      | t     | t       | t    | t     | t    | t     | t      |          |         |          |          |           | t         | t       |
| t            | 3419428      | c            | 3548608      | ns                         | t                                    | CFT073                     | ++                         | t                 | c   | t   | t       | t     | t        | c        | c    | c  | c      | c     | c       | c    | c     | c    | c     | c      |          |         |          |          |           | c         | c       |
| c            | 3419429      | t            | 3548609      | ns                         | c                                    | CFT073                     | ++                         | c                 | t   | c   | c       | c     | c        | t        | t    | t  | t      | t     | t       | t    | t     | t    | t     | t      |          |         |          |          |           | t         | t       |
| c            | 3419432      | a            | 3548612      | ns                         | c                                    | CFT073                     | ++                         | c                 | a   | c   | c       | c     | c        | a        | a    | a  | a      | a     | a       | a    | a     | a    | a     | a      |          |         |          |          |           | a         | a       |
| c            | 3419453      | t            | 3548633      | s                          | c                                    | CFT073                     | ++                         | c                 | t   | c   | c       | c     | c        | t        | t    | t  | t      | t     | t       | t    | t     | t    | t     | t      |          |         |          |          |           | t         | t       |
| t            | 3419486      | c            | 3548666      | s                          | t                                    | CFT073                     | ++                         | t                 | c   | t   | t       | t     | t        | c        | c    | c  | c      | c     | c       | c    | c     | c    | c     | c      |          |         |          |          |           | c         | c       |
| a            | 3419495      | g            | 3548675      | s                          | a                                    | CFT073                     | ++                         | a                 | g   | a   | a       | a     | a        | g        | g    | g  | g      | g     | g       | g    | g     | g    | g     | g      |          |         |          |          |           | g         | g       |

| Clone D base | Clone D site | CFT 073 base | CFT 073 site | mutation type <sup>a</sup> | Inferred ancestral base <sup>b</sup> | lineage inferred to mutate | Support level <sup>c</sup> | ED1a <sup>d</sup> | 536 | S88 | APEC O1 | UT189 | E2348/69 | ATCC8739 | K-12 | HS | SMS3-5 | IAI39 | E24377A | SE11 | 55989 | IAI1 | Sakai | UMN026 | B4 Sb227 | F5 8401 | SS Ss046 | D1 Sd197 | B18 BS512 | F2a 2457T | F2a 301 |
|--------------|--------------|--------------|--------------|----------------------------|--------------------------------------|----------------------------|----------------------------|-------------------|-----|-----|---------|-------|----------|----------|------|----|--------|-------|---------|------|-------|------|-------|--------|----------|---------|----------|----------|-----------|-----------|---------|
| c            | 3419498      | t            | 3548678      | s                          | c                                    | CFT073                     | ++                         | c                 | c   | c   | c       | c     | c        | t        | c    | t  | c      | c     | c       | c    | c     | c    | c     |        |          |         |          |          |           | c         | c       |
| t            | 3419507      | c            | 3548687      | s                          | t                                    | CFT073                     | ++                         | t                 | c   | t   | t       | t     | t        | c        | t    | c  | c      | c     | c       | c    | c     | c    | c     |        |          |         |          |          |           | c         | c       |
| c            | 3419529      | t            | 3548709      | s                          | c                                    | CFT073                     | ++                         | c                 | t   | c   | c       | c     | c        | t        | c    | t  | t      | c     | c       | c    | c     | c    | c     |        |          |         |          |          |           | c         | c       |
| g            | 3419531      | a            | 3548711      | s                          | g                                    | CFT073                     | ++                         | g                 | a   | g   | g       | g     | g        | a        | g    | a  | a      | g     | g       | g    | g     | g    | g     | g      |          |         |          |          | g         | g         |         |
| a            | 3419534      | g            | 3548714      | s                          | a                                    | CFT073                     | ++                         | a                 | g   | a   | a       | a     | a        | g        | g    | g  | g      | g     | g       | g    | g     | g    | g     | g      |          |         |          |          | g         | g         |         |
| c            | 3419564      | t            | 3548744      | s                          | t                                    | clone D                    | ++                         | t                 | t   | c   | c       | c     | t        | t        | t    | t  | t      | t     | t       | t    | t     | t    | t     | t      |          |         |          |          | t         | t         |         |
| a            | 3419567      | t            | 3548747      | s                          | t                                    | clone D                    | ++                         | t                 | t   | a   | a       | a     | t        | t        | t    | t  | t      | t     | t       | t    | t     | t    | t     | t      |          |         |          |          | t         | t         |         |
| a            | 3419573      | g            | 3548753      | s                          | g                                    | clone D                    | ++                         | g                 | g   | a   | a       | a     | g        | g        | g    | g  | g      | g     | g       | g    | g     | g    | g     | g      |          |         |          |          | g         | g         |         |
| a            | 3419588      | g            | 3548768      | s                          | a                                    | CFT073                     | ++                         | a                 | g   | a   | a       | a     | a        | g        | g    | g  | g      | g     | g       | g    | g     | g    | g     | g      |          |         |          |          | g         | g         |         |
| t            | 3419629      | c            | 3548809      | ns                         | c                                    | clone D                    | ++                         | c                 | c   | c   | c       | c     | t        | c        | c    | c  | c      | c     | c       | c    | c     | c    | c     | c      |          |         |          |          | c         | c         |         |
| c            | 3419636      | t            | 3548816      | s                          | t                                    | clone D                    | ++                         | t                 | c   | t   | t       | t     | c        | t        | t    | c  | c      | t     | t       | t    | t     | t    | t     | t      |          |         |          |          | t         | t         |         |
| t            | 3419639      | c            | 3548819      | s                          | c                                    | clone D                    | ++                         | c                 | t   | c   | c       | c     | t        | c        | c    | t  | t      | c     | c       | c    | c     | c    | c     | c      |          |         |          |          | c         | c         |         |
| c            | 3419651      | t            | 3548831      | s                          | t                                    | clone D                    | ++                         | t                 | t   | c   | c       | c     | c        | t        | t    | t  | t      | t     | t       | t    | t     | t    | t     | t      |          |         |          |          | t         | t         |         |
| c            | 3419654      | t            | 3548834      | s                          | t                                    | clone D                    | ++                         | t                 | t   | c   | c       | c     | c        | t        | t    | t  | t      | t     | t       | t    | t     | t    | t     | t      |          |         |          |          | t         | t         |         |
| c            | 3419669      | t            | 3548849      | s                          | t                                    | clone D                    | ++                         | t                 | t   | t   | t       | t     | c        | t        | t    | t  | t      | t     | t       | t    | t     | t    | t     | t      |          |         |          |          | t         | t         |         |
| c            | 3419819      | t            | 3548999      | s                          | c                                    | CFT073                     | ++                         | c                 | c   | c   | c       | c     | c        | t        | c    | c  | c      | t     | c       | t    | c     | c    | c     |        |          |         |          | t        | t         |           |         |
| t            | 3419826      | a            | 3549006      | ns                         | t                                    | CFT073                     | ++                         | t                 | t   | t   | t       | t     | a        | a        | a    | a  | a      | a     | a       | a    | a     | a    | a     | t      |          |         |          |          | a         | a         |         |
| c            | 3419861      | t            | 3549041      | s                          | c                                    | CFT073                     | ++                         | c                 | c   | c   | c       | c     | c        | t        | c    | c  | c      | c     | c       | c    | c     | c    | c     | c      |          |         |          |          | c         | c         |         |
| t            | 3419879      | c            | 3549059      | s                          | c                                    | clone D                    | ++                         | c                 | c   | t   | t       | t     | c        | c        | c    | t  | c      | c     | c       | c    | c     | c    | c     | c      |          |         |          |          | c         | c         |         |
| c            | 3419900      | t            | 3549080      | s                          | c                                    | CFT073                     | ++                         | c                 | t   | c   | c       | c     | c        | t        | t    | t  | t      | t     | t       | t    | t     | t    | t     | t      |          |         |          |          | t         | t         |         |
| a            | 3419901      | g            | 3549081      | ns                         | g                                    | clone D                    | ++                         | g                 | g   | g   | g       | g     | g        | g        | g    | g  | g      | g     | g       | g    | g     | g    | g     | g      |          |         |          |          | g         | g         |         |
| a            | 3419933      | g            | 3549113      | s                          | a                                    | CFT073                     | ++                         | a                 | g   | a   | a       | a     | a        | g        | a    | a  | a      | a     | a       | a    | a     | a    | a     | a      |          |         |          |          | a         | a         |         |
| a            | 3419957      | c            | 3549137      | ns                         | a                                    | CFT073                     | ++                         | a                 | c   | a   | a       | a     | a        | c        | a    | a  | a      | a     | a       | a    | a     | a    | a     | a      |          |         |          |          | a         | a         |         |
| t            | 3420032      | a            | 3549212      | s                          | t                                    | CFT073                     | ++                         | t                 | a   | t   | t       | t     | a        | a        | a    | a  | a      | a     | a       | a    | a     | a    | a     | a      |          |         |          |          | a         | a         |         |
| c            | 3420068      | t            | 3549248      | s                          | c                                    | CFT073                     | ++                         | c                 | c   | c   | c       | c     | c        | t        | c    | c  | c      | t     | c       | c    | c     | c    | c     | c      |          |         |          |          | c         | c         |         |
| a            | 3420115      | t            | 3549295      | ns                         | t                                    | clone D                    | ++                         | t                 | t   | a   | a       | a     | t        | t        | t    | t  | t      | t     | t       | t    | t     | t    | t     | t      |          |         |          |          | t         | t         |         |
| a            | 3420131      | g            | 3549311      | nc                         | a                                    | CFT073                     | ++                         | a                 | g   | a   | a       | a     | a        | g        | g    | g  | g      | g     | g       | g    | g     | g    | g     | g      |          |         |          |          | g         | g         |         |
| g            | 3420177      | a            | 3549357      | ns                         | g                                    | CFT073                     | ++                         | g                 | a   | a   | a       | a     | g        | a        | a    | a  | a      | a     | a       | a    | a     | a    | a     | a      |          |         |          |          | a         | a         |         |

| Clone D base | Clone D site | CFT 073 base | CFT 073 site | mutation type <sup>a</sup> | Inferred ancestral base <sup>b</sup> | lineage inferred to mutate | Support level <sup>c</sup> | ED1a <sup>d</sup> | 536 | S88 | APEC O1 | UT189 | E2348/69 | ATCC8739 | K-12 | HS | SMS3-5 | IAI39 | E24377A | SE11 | 55989 | IAI1 | Sakai | UMN026 | B4 Sb227 | F5 8401 | SS Ss046 | D1 Sd197 | B18 BS512 | F2a 2457T | F2a 301 |
|--------------|--------------|--------------|--------------|----------------------------|--------------------------------------|----------------------------|----------------------------|-------------------|-----|-----|---------|-------|----------|----------|------|----|--------|-------|---------|------|-------|------|-------|--------|----------|---------|----------|----------|-----------|-----------|---------|
| c            | 3420216      | t            | 3549396      | ns                         | c                                    | CFT073                     | ++                         | c                 | c   | c   | c       | c     | c        | t        | c    | c  | c      | c     | c       | c    | t     | c    | t     |        |          |         |          |          |           | c         | c       |
| a            | 3420304      | g            | 3549484      | s                          | a                                    | CFT073                     | ++                         | a                 | g   | a   | a       | a     | a        | g        | g    | g  | g      | g     | g       | g    | g     | g    | g     | g      |          |         |          |          |           | g         | g       |
| g            | 3420316      | a            | 3549496      | s                          | g                                    | CFT073                     | ++                         | g                 | g   | g   | g       | g     | c        | a        | g    | g  | g      | g     | g       | g    | g     | g    | g     | g      |          |         |          |          |           | g         | g       |
| a            | 3420358      | g            | 3549538      | s                          | a                                    | CFT073                     | ++                         | a                 | g   | a   | a       | a     | a        | g        | g    | g  | g      | a     | a       | g    | g     | g    | g     | a      |          |         |          |          |           | a         | a       |
| a            | 3420397      | g            | 3549577      | s                          | a                                    | CFT073                     | ++                         | a                 | g   | a   | a       | a     | a        | g        | g    | g  | g      | g     | g       | g    | g     | g    | g     | g      |          |         |          |          |           | g         | g       |
| a            | 3420402      | g            | 3549582      | s                          | a                                    | CFT073                     | ++                         | a                 | g   | a   | a       | a     | a        | g        | g    | g  | g      | g     | g       | g    | a     | g    | g     | g      |          |         |          |          |           | g         | g       |
| c            | 3420514      | g            | 3549694      | s                          | c                                    | CFT073                     | ++                         | c                 | c   | c   | c       | c     | t        | g        | c    | c  | c      | c     | c       | c    | g     | c    | g     |        |          |         |          |          | c         | c         |         |
| c            | 3420523      | t            | 3549703      | s                          | c                                    | CFT073                     | ++                         | c                 | c   | c   | c       | c     | c        | t        | c    | c  | c      | t     | c       | c    | c     | c    | t     |        |          |         |          |          | t         | t         |         |
| t            | 3420540      | c            | 3549720      | ns                         | t                                    | CFT073                     | ++                         | t                 | c   | t   | t       | t     | t        | c        | c    | c  | c      | t     | c       | t    | c     | t    | t     |        |          |         |          |          | t         | t         |         |
| t            | 3420555      | c            | 3549735      | ns                         | t                                    | CFT073                     | ++                         | t                 | c   | c   | c       | c     | t        | c        | c    | c  | c      | c     | c       | t    | c     | c    | c     |        |          |         |          |          | c         | c         |         |
| a            | 3420573      | t            | 3549753      | ns                         | t                                    | clone D                    | ++                         | t                 | t   | t   | t       | t     | a        | t        | t    | t  | t      | t     | t       | t    | t     | t    | t     |        |          |         |          |          | t         | t         |         |
| a            | 3420577      | t            | 3549757      | ns                         | a                                    | CFT073                     | ++                         | a                 | t   | t   | t       | t     | a        | t        | t    | t  | t      | t     | t       | t    | t     | t    | t     |        |          |         |          |          | t         | t         |         |
| g            | 3420578      | a            | 3549758      | ns                         | g                                    | CFT073                     | ++                         | g                 | g   | a   | a       | a     | g        | a        | g    | g  | g      | a     | g       | a    | g     | a    | g     | a      |          |         |          |          | a         | a         |         |
| t            | 3420587      | a            | 3549767      | ns                         | a                                    | clone D                    | ++                         | a                 | a   | a   | a       | a     | t        | a        | a    | a  | a      | a     | a       | a    | a     | a    | a     |        |          |         |          |          | a         | a         |         |
| a            | 3420649      | g            | 3549829      | s                          | a                                    | CFT073                     | ++                         | a                 | g   | g   | g       | g     | a        | g        | g    | g  | g      | g     | g       | g    | g     | g    | g     | g      |          |         |          |          | g         | g         |         |
| c            | 3420670      | t            | 3549850      | s                          | c                                    | CFT073                     | ++                         | c                 | t   | c   | c       | c     | c        | t        | t    | t  | t      | t     | t       | t    | t     | t    | t     |        |          |         |          |          | t         | t         |         |
| a            | 3420700      | g            | 3549880      | s                          | g                                    | clone D                    | ++                         | g                 | g   | g   | g       | g     | a        | g        | g    | g  | g      | g     | g       | g    | g     | g    | g     | g      |          |         |          |          | g         | g         |         |
| g            | 3420706      | a            | 3549886      | s                          | g                                    | CFT073                     | ++                         | g                 | a   | g   | g       | g     | g        | a        | a    | a  | a      | a     | a       | a    | a     | a    | a     | g      |          |         |          |          | a         | a         |         |
| g            | 3420778      | a            | 3549958      | s                          | g                                    | CFT073                     | ++                         | g                 | g   | g   | g       | g     | a        | a        | g    | g  | g      | a     | g       | g    | g     | g    | a     |        |          |         |          |          | a         | a         |         |
| a            | 3420790      | c            | 3549970      | s                          | a                                    | CFT073                     | ++                         | a                 | a   | a   | a       | a     | c        | c        | c    | a  | a      | c     | c       | c    | c     | c    | c     |        |          |         |          |          | c         | c         |         |
| g            | 3420852      | a            | 3550032      | s                          | g                                    | CFT073                     | ++                         | g                 | g   | g   | g       | g     | g        | a        | g    | g  | g      | a     | g       | a    | g     | g    | g     | g      |          |         |          |          | a         | a         |         |
| c            | 3420865      | t            | 3550045      | s                          | c                                    | CFT073                     | ++                         | c                 | c   | c   | c       | c     | c        | t        | c    | c  | c      | c     | c       | c    | c     | c    | c     |        |          |         |          |          | c         | c         |         |
| c            | 3420877      | t            | 3550057      | ns                         | c                                    | CFT073                     | ++                         | c                 | c   | c   | c       | c     | c        | t        | c    | c  | c      | c     | c       | c    | c     | c    | c     |        |          |         |          |          | c         | c         |         |
| c            | 3420878      | a            | 3550058      | ns                         | a                                    | clone D                    | ++                         | a                 | a   | a   | a       | a     | a        | a        | a    | a  | a      | a     | a       | a    | a     | a    | a     |        |          |         |          |          | a         | a         |         |
| g            | 3420915      | a            | 3550095      | s                          | g                                    | CFT073                     | ++                         | g                 | a   | g   | g       | g     | a        | a        | a    | a  | a      | a     | a       | a    | a     | a    | a     | a      |          |         |          |          | a         | a         |         |
| g            | 3420922      | t            | 3550102      | s                          | t                                    | clone D                    | ++                         | t                 | g   | t   | t       | t     | g        | t        | g    | g  | g      | g     | g       | g    | g     | g    | g     | g      |          |         |          |          | g         | g         |         |
| g            | 3420965      | a            | 3550145      | ns                         | g                                    | CFT073                     | ++                         | g                 | g   | g   | g       | g     | g        | a        | g    | g  | g      | g     | g       | g    | g     | g    | g     | g      |          |         |          |          | g         | g         |         |
| g            | 3421002      | a            | 3550182      | s                          | a                                    | clone D                    | ++                         | a                 | a   | a   | a       | a     | a        | a        | a    | a  | a      | a     | a       | a    | a     | a    | a     | g      |          |         |          |          | a         | a         |         |

| Clone D base | Clone D site | CFT 073 base | CFT 073 site | mutation type <sup>a</sup> | Inferred ancestral base <sup>b</sup> | lineage inferred to mutate | Support level <sup>c</sup> | ED1a <sup>d</sup> | 536 | S88 | APEC O1 | UT189 | E2348/69 | ATCC8739 | K-12 | HS | SMS3-5 | IAI39 | E24377A | SE11 | 55989 | IAI1 | Sakai | UMN026 | B4 Sb227 | F5 8401 | SS Ss046 | D1 Sd197 | B18 BS512 | F2a 2457T | F2a 301 |
|--------------|--------------|--------------|--------------|----------------------------|--------------------------------------|----------------------------|----------------------------|-------------------|-----|-----|---------|-------|----------|----------|------|----|--------|-------|---------|------|-------|------|-------|--------|----------|---------|----------|----------|-----------|-----------|---------|
| g            | 3421009      | c            | 3550189      | s                          | g                                    | CFT073                     | ++                         | g                 | c   | g   | g       | g     | c        | c        | c    | c  | c      | c     | c       | c    | c     | c    | c     | c      |          |         |          |          |           | c         | c       |
| a            | 3421012      | g            | 3550192      | s                          | a                                    | CFT073                     | ++                         | a                 | g   | a   | a       | a     | g        | g        | g    | g  | g      | g     | g       | g    | t     | g    | g     |        |          |         |          |          |           | t         | t       |
| a            | 3421021      | c            | 3550201      | s                          | c                                    | clone D                    | ++                         | c                 | c   | c   | c       | c     | c        | c        | c    | c  | c      | c     | c       | c    | a     | c    | c     | c      |          |         |          |          |           | a         | a       |
| c            | 3421042      | t            | 3550222      | s                          | c                                    | CFT073                     | ++                         | c                 | c   | c   | c       | c     | c        | t        | c    | t  | c      | c     | c       | c    | c     | c    | c     | c      |          |         |          |          |           | c         | c       |
| c            | 3421078      | t            | 3550258      | s                          | c                                    | CFT073                     | ++                         | c                 | c   | c   | c       | c     | c        | t        | t    | c  | c      | c     | c       | t    | t     | t    | t     | c      |          |         |          |          | t         | t         |         |
| t            | 3421093      | c            | 3550273      | s                          | t                                    | CFT073                     | ++                         | t                 | c   | t   | t       | t     | c        | c        | c    | c  | c      | c     | c       | c    | c     | c    | c     | c      |          |         |          |          |           | c         | c       |
| a            | 3421120      | g            | 3550300      | s                          | a                                    | CFT073                     | ++                         | a                 | g   | a   | a       | a     | g        | g        | g    | g  | g      | g     | g       | g    | g     | g    | g     | g      |          |         |          |          |           | g         | g       |
| g            | 3421207      | a            | 3550387      | s                          | g                                    | CFT073                     | ++                         | g                 | a   | g   | g       | g     | a        | a        | a    | a  | a      | a     | a       | a    | a     | a    | a     | a      |          |         |          |          |           | a         | a       |
| a            | 3421225      | g            | 3550405      | s                          | a                                    | CFT073                     | ++                         | a                 | a   | a   | a       | a     | a        | g        | a    | a  | a      | a     | a       | a    | a     | a    | a     | a      | g        |         |          |          |           | a         | a       |
| g            | 3421244      | a            | 3550424      | ns                         | g                                    | CFT073                     | ++                         | g                 | a   | g   | g       | g     | a        | a        | a    | a  | a      | a     | a       | a    | a     | a    | a     | a      |          |         |          |          |           | a         | a       |
| g            | 3421260      | a            | 3550440      | ns                         | g                                    | CFT073                     | ++                         | g                 | a   | g   | g       | g     | a        | a        | a    | a  | a      | a     | a       | a    | a     | a    | a     | a      |          |         |          |          |           | a         | a       |
| t            | 3421271      | g            | 3550451      | ns                         | g                                    | clone D                    | ++                         | g                 | g   | g   | g       | g     | g        | g        | g    | g  | g      | g     | g       | g    | g     | g    | g     | g      |          |         |          |          |           | g         | g       |
| a            | 3421286      | g            | 3550466      | ns                         | a                                    | CFT073                     | ++                         | a                 | g   | a   | a       | a     | g        | g        | g    | g  | g      | g     | g       | g    | g     | g    | g     | g      |          |         |          |          |           | g         | g       |
| c            | 3421311      | t            | 3550491      | ns                         | c                                    | CFT073                     | ++                         | c                 | t   | c   | c       | c     | t        | c        | c    | t  | t      | t     | t       | c    | t     | c    | t     | t      |          |         |          |          |           | c         | c       |
| g            | 3421374      | a            | 3550554      | s                          | g                                    | CFT073                     | ++                         | g                 | g   | g   | g       | g     | g        | a        | g    | g  | g      | g     | g       | g    | g     | g    | g     | g      |          |         |          |          |           | g         | g       |
| c            | 3421394      | t            | 3550574      | ns                         | c                                    | CFT073                     | ++                         | c                 | c   | c   | c       | c     | c        | t        | c    | c  | c      | t     | t       | t    | t     | t    | t     | c      |          |         |          |          |           | t         | t       |
| g            | 3421415      | a            | 3550595      | s                          | g                                    | CFT073                     | ++                         | g                 | a   | g   | g       | g     | a        | a        | a    | a  | a      | a     | a       | a    | a     | a    | a     | a      |          |         |          |          |           | a         | a       |
| g            | 3421418      | a            | 3550598      | s                          | g                                    | CFT073                     | ++                         | g                 | a   | g   | g       | g     | a        | a        | a    | a  | a      | a     | a       | a    | a     | a    | a     | a      |          |         |          |          |           | a         | a       |
| c            | 3421434      | t            | 3550614      | s                          | c                                    | CFT073                     | ++                         | c                 | t   | c   | c       | c     | t        | t        | t    | t  | t      | t     | t       | t    | t     | t    | t     | t      |          |         |          |          |           | t         | t       |
| t            | 3421488      | g            | 3550668      | s                          | t                                    | CFT073                     | ++                         | t                 | g   | t   | t       | t     | t        | g        | g    | t  | t      | t     | t       | g    | t     | g    | t     | t      |          |         |          |          |           | g         | g       |
| t            | 3421506      | c            | 3550686      | s                          | t                                    | CFT073                     | ++                         | t                 | t   | t   | t       | t     | t        | c        | t    | t  | t      | t     | t       | t    | t     | t    | t     | t      |          |         |          |          |           | t         | t       |
| t            | 3421548      | c            | 3550728      | s                          | t                                    | CFT073                     | ++                         | t                 | c   | t   | t       | t     | c        | c        | c    | c  | c      | c     | c       | c    | c     | c    | c     | c      |          |         |          |          |           | c         | c       |
| t            | 3421569      | c            | 3550749      | s                          | t                                    | CFT073                     | ++                         | t                 | t   | t   | t       | t     | t        | c        | t    | t  | t      | c     | t       | t    | t     | t    | t     | t      |          |         |          |          |           | c         | c       |
| g            | 3421608      | c            | 3550788      | s                          | g                                    | CFT073                     | ++                         | g                 | c   | g   | g       | g     | c        | c        | c    | c  | c      | c     | c       | c    | c     | c    | c     | c      |          |         |          |          |           | c         | c       |
| c            | 3421614      | t            | 3550794      | s                          | c                                    | CFT073                     | ++                         | c                 | c   | c   | c       | c     | t        | t        | t    | t  | t      | t     | t       | t    | t     | t    | t     | t      |          |         |          |          |           | t         | t       |
| g            | 3421647      | a            | 3550827      | s                          | g                                    | CFT073                     | ++                         | g                 | g   | g   | g       | g     | g        | a        | g    | g  | g      | g     | g       | g    | g     | g    | g     | g      |          |         |          |          |           | g         | g       |
| g            | 3421667      | t            | 3550847      | ns                         | g                                    | CFT073                     | ++                         | g                 | g   | g   | g       | g     | g        | t        | g    | g  | g      | g     | g       | g    | g     | g    | g     | g      |          |         |          |          |           | g         | g       |
| g            | 3421677      | a            | 3550857      | s                          | g                                    | CFT073                     | ++                         | g                 | g   | g   | g       | g     | g        | a        | g    | g  | g      | a     | a       | a    | a     | a    | a     | g      |          |         |          |          |           | a         | a       |





| Clone D base | Clone D site | CFT 073 base | CFT 073 site | mutation type <sup>a</sup> | Inferred ancestral base <sup>b</sup> | lineage inferred to mutate | Support level <sup>c</sup> | ED1a <sup>d</sup> | 536 | S88 | APEC O1 | UT189 | E2348/69 | ATCC8739 | K-12 | HS | SMS3-5 | IAI39 | E24377A | SE11 | 55989 | IAI1 | Sakai | UMN026 | B4 Sb227 | F5 8401 | SS Ss046 | D1 Sd197 | B18 BS512 | F2a 2457T | F2a 301 |
|--------------|--------------|--------------|--------------|----------------------------|--------------------------------------|----------------------------|----------------------------|-------------------|-----|-----|---------|-------|----------|----------|------|----|--------|-------|---------|------|-------|------|-------|--------|----------|---------|----------|----------|-----------|-----------|---------|
| a            | 3422601      | g            | 3551781      | s                          | a                                    | CFT073                     | ++                         | a                 | g   | a   | a       | a     | g        | g        | g    | g  | g      | g     | g       | g    | g     | g    | g     |        |          |         |          |          |           | g         | g       |
| a            | 3422627      | g            | 3551807      | ns                         | a                                    | CFT073                     | ++                         | a                 | g   | a   | a       | a     | g        | g        | g    | g  | g      | g     | g       | g    | g     | g    | g     |        |          |         |          |          |           | g         | g       |
| a            | 3422679      | c            | 3551859      | s                          | a                                    | CFT073                     | ++                         | a                 | c   | a   | a       | a     | c        | c        | c    | c  | c      | c     | c       | c    | c     | c    | c     | c      |          |         |          |          |           | c         | c       |
| t            | 3422688      | c            | 3551868      | s                          | t                                    | CFT073                     | ++                         | t                 | c   | t   | t       | t     | c        | c        | c    | c  | c      | c     | c       | c    | c     | c    | c     | c      |          |         |          |          |           | c         | c       |
| t            | 3422723      | c            | 3551903      | ns                         | t                                    | CFT073                     | ++                         | t                 | c   | t   | t       | t     | c        | c        | c    | c  | c      | c     | c       | c    | c     | c    | c     | c      |          |         |          |          |           | c         | c       |
| c            | 3422724      | t            | 3551904      | s                          | c                                    | CFT073                     | ++                         | c                 | c   | c   | c       | c     | c        | t        | c    | c  | c      | c     | t       | t    | t     | t    | t     | c      |          |         |          |          |           | t         | t       |
| a            | 3422808      | g            | 3551988      | s                          | a                                    | CFT073                     | ++                         | a                 | g   | a   | a       | a     | g        | g        | g    | g  | g      | g     | g       | g    | g     | g    | g     | g      |          |         |          |          |           | g         | g       |
| g            | 3422842      | t            | 3552022      | ns                         | g                                    | CFT073                     | ++                         | g                 | t   | g   | g       | g     | t        | t        | t    | t  | t      | t     | t       | t    | t     | t    | t     | t      |          |         |          |          |           | t         | t       |
| c            | 3422843      | g            | 3552023      | ns                         | c                                    | CFT073                     | ++                         | c                 | g   | c   | c       | c     | g        | g        | g    | g  | g      | g     | g       | g    | g     | g    | g     | g      |          |         |          |          |           | g         | g       |
| g            | 3422845      | a            | 3552025      | ns                         | g                                    | CFT073                     | ++                         | g                 | a   | g   | g       | g     | a        | a        | a    | a  | a      | a     | a       | a    | a     | a    | a     | a      |          |         |          |          |           | a         | a       |
| g            | 3422847      | a            | 3552027      | s                          | g                                    | CFT073                     | ++                         | g                 | a   | g   | g       | g     | a        | a        | a    | a  | a      | a     | a       | a    | a     | a    | a     | a      |          |         |          |          |           | a         | a       |
| t            | 3422850      | c            | 3552030      | s                          | t                                    | CFT073                     | ++                         | t                 | c   | t   | t       | t     | c        | c        | c    | c  | c      | c     | c       | c    | c     | c    | c     | c      |          |         |          |          |           | c         | c       |
| c            | 3422853      | g            | 3552033      | s                          | c                                    | CFT073                     | ++                         | c                 | g   | c   | c       | c     | g        | g        | g    | g  | g      | g     | g       | g    | g     | g    | g     | g      |          |         |          |          |           | g         | g       |
| t            | 3422862      | c            | 3552042      | ns                         | t                                    | CFT073                     | ++                         | t                 | c   | t   | t       | t     | c        | c        | c    | c  | c      | c     | c       | c    | c     | c    | c     | c      |          |         |          |          |           | c         | c       |
| g            | 3422863      | a            | 3552043      | ns                         | g                                    | CFT073                     | ++                         | g                 | a   | g   | g       | g     | a        | a        | a    | a  | a      | a     | a       | a    | a     | a    | a     | a      |          |         |          |          |           | a         | a       |
| c            | 3422864      | t            | 3552044      | ns                         | c                                    | CFT073                     | ++                         | c                 | t   | c   | c       | c     | t        | t        | t    | t  | t      | t     | t       | t    | t     | t    | t     | t      |          |         |          |          |           | t         | t       |
| g            | 3422868      | a            | 3552048      | s                          | g                                    | CFT073                     | ++                         | g                 | a   | g   | g       | g     | a        | a        | a    | a  | a      | a     | a       | a    | a     | a    | a     | a      |          |         |          |          |           | a         | a       |
| g            | 3422873      | a            | 3552053      | s                          | g                                    | CFT073                     | ++                         | g                 | g   | g   | g       | g     | g        | a        | g    | g  | g      | g     | a       | g    | a     | g    | a     | g      |          |         |          |          |           | a         | a       |
| a            | 3422874      | c            | 3552054      | s                          | a                                    | CFT073                     | ++                         | a                 | c   | a   | a       | a     | c        | c        | c    | c  | c      | c     | c       | c    | c     | c    | c     | c      |          |         |          |          |           | c         | c       |
| g            | 3422877      | a            | 3552057      | ns                         | g                                    | CFT073                     | ++                         | g                 | a   | g   | g       | g     | a        | a        | a    | a  | a      | a     | a       | a    | a     | a    | a     | a      |          |         |          |          |           | a         | a       |
| c            | 3422879      | t            | 3552059      | ns                         | c                                    | CFT073                     | ++                         | c                 | t   | c   | c       | c     | t        | t        | t    | t  | t      | t     | t       | t    | t     | t    | t     | t      |          |         |          |          |           | t         | t       |
| c            | 3422884      | a            | 3552064      | ns                         | c                                    | CFT073                     | ++                         | c                 | a   | c   | c       | c     | a        | a        | a    | a  | a      | a     | a       | a    | a     | a    | a     | a      |          |         |          |          |           | a         | a       |
| g            | 3422894      | a            | 3552074      | ns                         | g                                    | CFT073                     | ++                         | g                 | a   | g   | g       | g     | a        | a        | a    | a  | a      | a     | a       | a    | a     | a    | a     | a      |          |         |          |          |           | a         | a       |
| t            | 3422898      | c            | 3552078      | s                          | t                                    | CFT073                     | ++                         | t                 | c   | t   | t       | t     | c        | c        | c    | c  | c      | c     | c       | c    | c     | c    | c     | c      |          |         |          |          |           | c         | c       |
| a            | 3422909      | c            | 3552089      | ns                         | a                                    | CFT073                     | ++                         | a                 | t   | a   | a       | a     | t        | c        | t    | t  | t      | t     | c       | t    | c     | t    | c     | t      |          |         |          |          |           | c         | c       |
| t            | 3422915      | c            | 3552095      | s                          | t                                    | CFT073                     | ++                         | t                 | c   | t   | t       | t     | c        | c        | c    | a  | c      | c     | c       | c    | c     | c    | c     | c      |          |         |          |          |           | c         | c       |
| g            | 3422918      | a            | 3552098      | s                          | g                                    | CFT073                     | ++                         | g                 | a   | g   | g       | g     | a        | a        | a    | a  | a      | a     | a       | a    | a     | a    | a     | a      |          |         |          |          |           | a         | a       |
| a            | 3422930      | c            | 3552110      | s                          | a                                    | CFT073                     | ++                         | a                 | c   | a   | a       | a     | c        | c        | c    | c  | c      | c     | c       | c    | c     | c    | c     | c      |          |         |          |          |           | c         | c       |



| Clone D base | Clone D site | CFT 073 base | CFT 073 site | mutation type <sup>a</sup> | Inferred ancestral base <sup>b</sup> | lineage inferred to mutate | Support level <sup>c</sup> | ED1a <sup>d</sup> | 536 | S88 | APEC O1 | UT189 | E2348/69 | ATCC8739 | K-12 | HS | SMS3-5 | IAI39 | E24377A | SE11 | 55989 | IAI1 | Sakai | UMN026 | B4 Sb227 | F5 8401 | SS Ss046 | D1 Sd197 | B18 BS512 | F2a 2457T | F2a 301 |
|--------------|--------------|--------------|--------------|----------------------------|--------------------------------------|----------------------------|----------------------------|-------------------|-----|-----|---------|-------|----------|----------|------|----|--------|-------|---------|------|-------|------|-------|--------|----------|---------|----------|----------|-----------|-----------|---------|
| g            | 3423246      | c            | 3552426      | ns                         | g                                    | CFT073                     | ++                         | g                 | a   | g   | g       | g     | g        | c        | c    | c  | c      | c     | c       | c    | c     | c    | c     | c      |          |         |          |          |           | c         | c       |
| c            | 3423266      | t            | 3552446      | s                          | c                                    | CFT073                     | ++                         | c                 | t   | c   | c       | c     | c        | t        | t    | t  | t      | t     | t       | t    | t     | t    | t     | t      |          |         |          |          |           | t         | t       |
| g            | 3423283      | a            | 3552463      | s                          | g                                    | CFT073                     | ++                         | g                 | a   | g   | g       | g     | g        | a        | a    | a  | a      | a     | a       | a    | a     | a    | a     | a      |          |         |          |          |           | a         | a       |
| c            | 3423285      | g            | 3552465      | ns                         | c                                    | CFT073                     | ++                         | c                 | g   | c   | c       | c     | c        | g        | g    | g  | g      | g     | g       | g    | g     | g    | g     | g      |          |         |          |          |           | g         | g       |
| a            | 3423293      | c            | 3552473      | s                          | a                                    | CFT073                     | ++                         | a                 | c   | a   | a       | a     | a        | c        | c    | c  | c      | c     | c       | c    | c     | c    | c     | c      |          |         |          |          |           | c         | c       |
| g            | 3423296      | a            | 3552476      | s                          | g                                    | CFT073                     | ++                         | g                 | a   | g   | g       | g     | g        | a        | a    | a  | a      | a     | a       | a    | a     | a    | a     | a      |          |         |          |          |           | a         | a       |
| c            | 3423302      | t            | 3552482      | s                          | c                                    | CFT073                     | ++                         | c                 | t   | c   | c       | c     | c        | t        | t    | t  | t      | t     | t       | t    | t     | t    | t     | t      |          |         |          |          |           | t         | t       |
| c            | 3423310      | t            | 3552490      | ns                         | c                                    | CFT073                     | ++                         | c                 | c   | c   | c       | c     | c        | t        | t    | c  | c      | t     | t       | t    | t     | t    | t     | c      |          |         |          |          |           | t         | t       |
| a            | 3423311      | c            | 3552491      | s                          | a                                    | CFT073                     | ++                         | a                 | a   | a   | a       | a     | a        | c        | c    | c  | c      | c     | c       | c    | c     | c    | c     | c      |          |         |          |          |           | c         | c       |
| a            | 3423323      | g            | 3552503      | s                          | a                                    | CFT073                     | ++                         | a                 | g   | a   | a       | a     | a        | g        | g    | g  | g      | g     | g       | g    | g     | g    | g     | g      |          |         |          |          |           | g         | g       |
| a            | 3423330      | t            | 3552510      | ns                         | a                                    | CFT073                     | ++                         | a                 | t   | a   | a       | a     | a        | t        | t    | t  | t      | t     | t       | t    | t     | t    | t     | t      |          |         |          |          |           | t         | t       |
| a            | 3423365      | g            | 3552545      | s                          | a                                    | CFT073                     | ++                         | a                 | g   | a   | a       | a     | a        | g        | g    | g  | g      | g     | g       | g    | g     | g    | g     | g      |          |         |          |          |           | g         | g       |
| t            | 3423375      | c            | 3552555      | ns                         | t                                    | CFT073                     | ++                         | t                 | c   | t   | t       | t     | t        | c        | c    | c  | c      | c     | c       | c    | c     | c    | c     | c      |          |         |          |          |           | c         | c       |
| a            | 3423380      | c            | 3552560      | s                          | a                                    | CFT073                     | ++                         | a                 | c   | a   | a       | a     | a        | c        | c    | c  | c      | c     | c       | c    | c     | c    | c     | c      |          |         |          |          |           | c         | c       |
| a            | 3423455      | g            | 3552635      | s                          | a                                    | CFT073                     | ++                         | a                 | g   | a   | a       | a     | a        | g        | g    | g  | g      | g     | g       | g    | g     | g    | g     | a      |          |         |          |          |           | g         | g       |
| c            | 3423485      | t            | 3552665      | s                          | c                                    | CFT073                     | ++                         | c                 | t   | c   | c       | c     | c        | t        | t    | t  | t      | t     | t       | t    | t     | t    | t     | c      |          |         |          |          |           | t         | t       |
| g            | 3423497      | a            | 3552677      | s                          | g                                    | CFT073                     | ++                         | g                 | a   | g   | g       | g     | g        | a        | a    | a  | a      | a     | a       | a    | a     | a    | a     | g      |          |         |          |          |           | a         | a       |
| t            | 3423500      | a            | 3552680      | ns                         | t                                    | CFT073                     | ++                         | t                 | a   | t   | t       | t     | t        | a        | a    | a  | a      | a     | a       | a    | a     | a    | a     | t      |          |         |          |          |           | a         | a       |
| t            | 3423502      | c            | 3552682      | ns                         | t                                    | CFT073                     | ++                         | t                 | c   | t   | t       | t     | t        | c        | c    | c  | c      | c     | c       | c    | c     | c    | c     | t      |          |         |          |          |           | c         | c       |
| c            | 3423503      | a            | 3552683      | s                          | c                                    | CFT073                     | ++                         | c                 | a   | c   | c       | c     | c        | a        | a    | a  | a      | a     | a       | a    | a     | a    | a     | c      |          |         |          |          |           | a         | a       |
| c            | 3423521      | g            | 3552701      | s                          | c                                    | CFT073                     | ++                         | c                 | g   | c   | c       | c     | c        | g        | g    | g  | g      | g     | g       | g    | g     | g    | g     | c      |          |         |          |          |           | g         | g       |
| c            | 3423524      | t            | 3552704      | s                          | c                                    | CFT073                     | ++                         | c                 | c   | c   | c       | c     | c        | t        | t    | c  | c      | t     | t       | t    | t     | t    | t     | c      |          |         |          |          |           | t         | t       |
| g            | 3423533      | a            | 3552713      | ns                         | g                                    | CFT073                     | ++                         | g                 | t   | g   | g       | g     | g        | a        | a    | t  | t      | a     | a       | a    | a     | a    | a     | g      |          |         |          |          |           | a         | a       |
| t            | 3423535      | c            | 3552715      | ns                         | t                                    | CFT073                     | ++                         | t                 | t   | t   | t       | t     | t        | c        | c    | t  | t      | c     | c       | c    | c     | c    | c     | t      |          |         |          |          |           | c         | c       |
| t            | 3423559      | c            | 3552739      | ns                         | t                                    | CFT073                     | ++                         | t                 | t   | t   | t       | t     | t        | c        | c    | t  | t      | c     | t       | c    | t     | c    | t     | t      |          |         |          |          |           | c         | c       |
| a            | 3423563      | g            | 3552743      | s                          | a                                    | CFT073                     | ++                         | a                 | g   | a   | a       | a     | a        | g        | g    | g  | g      | g     | g       | g    | g     | g    | g     | a      |          |         |          |          |           | g         | g       |
| c            | 3423568      | t            | 3552748      | ns                         | c                                    | CFT073                     | ++                         | c                 | t   | c   | c       | c     | c        | t        | t    | t  | t      | t     | t       | t    | t     | t    | t     | c      |          |         |          |          |           | t         | t       |
| c            | 3423569      | g            | 3552749      | s                          | c                                    | CFT073                     | ++                         | c                 | g   | c   | c       | c     | c        | g        | g    | g  | g      | g     | g       | g    | g     | g    | g     | c      |          |         |          |          |           | g         | g       |

| Clone D base | Clone D site | CFT 073 base | CFT 073 site | mutation type <sup>a</sup> | Inferred ancestral base <sup>b</sup> | lineage inferred to mutate | Support level <sup>c</sup> | ED1a <sup>d</sup> | 536 | S88 | APEC O1 | UT189 | E2348/69 | ATCC8739 | K-12 | HS | SMS3-5 | IAI39 | E24377A | SE11 | 55989 | IAI1 | Sakai | UMN026 | B4 Sb227 | F5 8401 | SS Ss046 | D1 Sd197 | B18 BS512 | F2a 2457T | F2a 301 |
|--------------|--------------|--------------|--------------|----------------------------|--------------------------------------|----------------------------|----------------------------|-------------------|-----|-----|---------|-------|----------|----------|------|----|--------|-------|---------|------|-------|------|-------|--------|----------|---------|----------|----------|-----------|-----------|---------|
| t            | 3423580      | g            | 3552760      | ns                         | t                                    | CFT073                     | ++                         | t                 | g   | t   | t       | t     | t        | g        | g    | g  | g      | g     | g       | g    | g     | g    | t     |        |          |         |          |          | g         | g         |         |
| g            | 3423605      | a            | 3552785      | s                          | g                                    | CFT073                     | ++                         | g                 | g   | g   | g       | g     | g        | a        | a    | g  | g      | g     | a       | a    | a     | a    | g     |        |          |         |          |          | a         | a         |         |
| g            | 3423632      | a            | 3552812      | s                          | g                                    | CFT073                     | ++                         | g                 | g   | g   | g       | g     | g        | a        | a    | g  | g      | g     | a       | a    | a     | a    | g     |        |          |         |          | a        | a         |           |         |
| g            | 3423650      | a            | 3552830      | s                          | g                                    | CFT073                     | ++                         | g                 | g   | g   | g       | g     | g        | a        | g    | g  | g      | g     | a       | a    | a     | a    | g     |        |          |         |          | a        | a         |           |         |
| a            | 3423665      | g            | 3552845      | s                          | a                                    | CFT073                     | ++                         | a                 | g   | a   | a       | a     | a        | g        | g    | g  | g      | g     | g       | g    | g     | g    | g     |        |          |         |          | g        | g         |           |         |
| t            | 3423750      | c            | 3552930      | ns                         | t                                    | CFT073                     | ++                         | t                 | c   | t   | t       | t     | t        | c        | c    | c  | c      | c     | c       | c    | c     | c    | c     |        |          | c       |          | c        | c         |           |         |
| a            | 3423753      | c            | 3552933      | ns                         | a                                    | CFT073                     | ++                         | a                 | c   | a   | a       | a     | a        | c        | c    | c  | c      | c     | c       | c    | c     | c    | c     |        |          | c       |          | c        | c         |           |         |
| c            | 3423796      | t            | 3552976      | s                          | c                                    | CFT073                     | ++                         | c                 | t   | c   | c       | c     | c        | t        | t    | t  | c      | t     | t       | t    | t     | t    | c     |        |          | t       |          | t        | t         |           |         |
| g            | 3423804      | a            | 3552984      | s                          | g                                    | CFT073                     | ++                         | g                 | g   | g   | g       | g     | g        | a        | a    | g  | a      | a     | a       | a    | a     | a    | g     |        |          | a       |          | a        | a         |           |         |
| a            | 3423812      | g            | 3552992      | ns                         | a                                    | CFT073                     | ++                         | a                 | a   | a   | a       | a     | a        | g        | a    | a  | a      | g     | g       | g    | g     | g    | a     |        |          | a       |          | g        | g         |           |         |
| a            | 3423817      | g            | 3552997      | s                          | a                                    | CFT073                     | ++                         | a                 | a   | a   | a       | a     | a        | g        | a    | a  | a      | g     | g       | g    | g     | g    | a     |        |          | a       |          | g        | g         |           |         |
| t            | 3423847      | c            | 3553027      | s                          | t                                    | CFT073                     | ++                         | t                 | c   | t   | t       | t     | t        | c        | t    | c  | c      | c     | c       | c    | c     | c    | t     |        |          | c       |          | c        | c         |           |         |
| a            | 3423850      | t            | 3553030      | s                          | a                                    | CFT073                     | ++                         | a                 | t   | a   | a       | a     | a        | t        | a    | t  | t      | t     | t       | t    | t     | t    | a     |        |          | t       |          | t        | t         |           |         |
| c            | 3423853      | t            | 3553033      | s                          | c                                    | CFT073                     | ++                         | c                 | t   | c   | c       | c     | c        | t        | c    | t  | t      | t     | t       | t    | t     | t    | c     |        |          | t       |          | t        | t         |           |         |
| g            | 3423862      | a            | 3553042      | s                          | g                                    | CFT073                     | ++                         | g                 | g   | g   | g       | g     | g        | a        | g    | g  | g      | a     | a       | a    | a     | g    |       |        | a        |         | a        | a        |           |           |         |
| t            | 3423973      | a            | 3553153      | s                          | t                                    | CFT073                     | ++                         | t                 | t   | t   | t       | t     | t        | a        | c    | a  | t      | a     | a       | a    | a     | t    |       |        | c        |         | c        | c        |           |           |         |
| g            | 3424141      | a            | 3553321      | s                          | g                                    | CFT073                     | ++                         | g                 | g   | g   | g       | g     | g        | a        | a    | g  | g      | g     | a       | a    | a     | a    | g     |        |          | a       |          | a        | a         |           |         |
| a            | 3424160      | g            | 3553340      | ns                         | g                                    | clone D                    | ++                         | g                 | g   | g   | g       | g     | g        | g        | g    | g  | g      | g     | g       | g    | g     | g    | g     |        |          | g       |          | g        | g         |           |         |
| t            | 3424168      | c            | 3553348      | s                          | t                                    | CFT073                     | ++                         | t                 | c   | t   | t       | t     | t        | c        | c    | c  | c      | c     | c       | c    | c     | c    | c     |        |          | c       |          | c        | c         |           |         |
| a            | 3424192      | g            | 3553372      | s                          | a                                    | CFT073                     | ++                         | a                 | g   | a   | a       | a     | a        | g        | g    | g  | g      | g     | g       | g    | g     | g    | g     |        |          | g       |          | g        | g         |           |         |
| g            | 3424204      | a            | 3553384      | s                          | g                                    | CFT073                     | ++                         | g                 | g   | g   | g       | g     | g        | a        | a    | a  | g      | g     | a       | a    | a     | a    | a     |        |          | a       |          | a        | a         |           |         |
| t            | 3424210      | c            | 3553390      | s                          | t                                    | CFT073                     | ++                         | t                 | t   | t   | t       | t     | t        | c        | c    | t  | t      | t     | c       | c    | c     | c    | t     |        |          | c       |          | c        | c         |           |         |
| a            | 3424234      | g            | 3553414      | s                          | a                                    | CFT073                     | ++                         | a                 | g   | a   | a       | a     | a        | g        | g    | g  | g      | g     | g       | g    | g     | g    | g     |        |          | g       |          | g        | g         |           |         |
| a            | 3424270      | g            | 3553450      | s                          | a                                    | CFT073                     | ++                         | a                 | g   | g   | g       | g     | a        | g        | g    | g  | g      | g     | g       | g    | g     | g    | g     |        |          | g       |          | g        | g         |           |         |
| g            | 3424383      | a            | 3553563      | ns                         | g                                    | CFT073                     | ++                         | g                 | g   | g   | g       | g     | g        | g        | a    | g  | g      | g     | g       | g    | g     | g    | g     |        |          | g       |          | g        | g         |           |         |
| t            | 3424431      | g            | 3553611      | s                          | t                                    | CFT073                     | ++                         | t                 | t   | t   | t       | t     | t        | g        | g    | t  | t      | t     | t       | t    | t     | t    | t     |        |          | t       |          | t        | t         |           |         |
| t            | 3424539      | c            | 3553719      | ns                         | c                                    | clone D                    | ++                         | c                 | c   | c   | c       | c     | c        | c        | c    | c  | c      | c     | c       | c    | c     | c    | c     |        |          | c       |          | c        | c         |           |         |
| t            | 3424579      | c            | 3553759      | s                          | c                                    | clone D                    | ++                         | c                 | t   | c   | c       | c     | c        | c        | c    | c  | t      | t     | c       | c    | c     | c    | c     |        |          | c       |          | c        | c         |           |         |



| Clone D base | Clone D site | CFT 073 base | CFT 073 site | mutation type <sup>a</sup> | Inferred ancestral base <sup>b</sup> | lineage inferred to mutate | Support level <sup>c</sup> | ED1a <sup>d</sup> | 536 | S88 | APEC O1 | UT189 | E2348/69 | ATCC8739 | K-12 | HS | SMS3-5 | IAI39 | E24377A | SE11 | 55989 | IAI1 | Sakai | UMN026 | B4 Sb227 | F5 8401 | SS Ss046 | D1 Sd197 | B18 BS512 | F2a 2457T | F2a 301 |
|--------------|--------------|--------------|--------------|----------------------------|--------------------------------------|----------------------------|----------------------------|-------------------|-----|-----|---------|-------|----------|----------|------|----|--------|-------|---------|------|-------|------|-------|--------|----------|---------|----------|----------|-----------|-----------|---------|
| c            | 3425542      | t            | 3554722      | s                          | c                                    | CFT073                     | ++                         | c                 | t   | c   | c       | c     | c        | t        | t    | t  | t      | t     | t       | c    | t     | c    | t     |        |          | t       |          |          | t         | t         |         |
| g            | 3425656      | c            | 3554836      | s                          | g                                    | CFT073                     | ++                         | g                 | c   | g   | g       | g     | c        | c        | c    | c  | g      | g     | c       | c    | c     | c    |       | g      |          | c       |          |          | c         | c         |         |
| a            | 3425665      | g            | 3554845      | s                          | a                                    | CFT073                     | ++                         | a                 | g   | a   | a       | a     | g        | g        | g    | g  | g      | g     | g       | g    | g     | g    |       | g      |          | g       |          |          | g         | g         |         |
| a            | 3425770      | g            | 3554950      | ns                         | a                                    | CFT073                     | ++                         | a                 | g   | a   | a       | a     | a        | g        | g    | g  | g      | g     | g       | g    | g     | g    |       | g      |          | g       |          |          | g         | g         |         |
| t            | 3425771      | g            | 3554951      | ns                         | t                                    | CFT073                     | ++                         | t                 | g   | t   | t       | t     | g        | g        | g    | g  | g      | g     | g       | g    | g     | g    |       | g      |          | g       |          |          | g         | g         |         |
| t            | 3425773      | g            | 3554953      | s                          | t                                    | CFT073                     | ++                         | t                 | g   | t   | t       | t     | g        | g        | g    | g  | g      | g     | g       | g    | g     | g    |       | g      |          | g       |          |          | g         | g         |         |
| c            | 3425857      | a            | 3555037      | ns                         | c                                    | CFT073                     | ++                         | c                 | a   | c   | c       | c     | c        | a        | a    | a  | a      | a     | a       | a    | a     | a    |       | a      |          | a       |          |          | a         | a         |         |
| t            | 3425869      | a            | 3555049      | s                          | t                                    | CFT073                     | ++                         | t                 | t   | t   | t       | t     | t        | a        | a    | t  | t      | t     | a       | t    | a     | t    |       | t      |          | t       |          |          | t         | t         |         |
| t            | 3425892      | a            | 3555072      | ns                         | t                                    | CFT073                     | ++                         | t                 | a   | t   | t       | t     | a        | a        | a    | a  | a      | a     | a       | a    | a     | a    |       | a      |          | a       |          |          | a         | a         |         |
| t            | 3425972      | g            | 3555152      | s                          | t                                    | CFT073                     | ++                         | t                 | t   | t   | t       | t     | t        | g        | g    | t  | t      | t     | g       | t    | g     | t    |       | t      |          | t       |          |          | t         | t         |         |
| t            | 3425975      | g            | 3555155      | ns                         | t                                    | CFT073                     | ++                         | t                 | t   | t   | t       | t     | t        | g        | g    | t  | t      | t     | g       | t    | g     | t    |       | t      |          | t       |          |          | t         | t         |         |
| c            | 3425978      | t            | 3555158      | s                          | c                                    | CFT073                     | ++                         | c                 | c   | c   | c       | c     | c        | t        | t    | c  | c      | c     | t       | c    | t     | c    |       | c      |          | c       |          |          | c         | c         |         |
| a            | 3425981      | c            | 3555161      | s                          | a                                    | CFT073                     | ++                         | a                 | a   | a   | a       | a     | a        | c        | c    | a  | a      | a     | c       | a    | c     | a    |       | a      |          | a       |          |          | a         | a         |         |
| a            | 3426122      | g            | 3555302      | s                          | a                                    | CFT073                     | ++                         | a                 | g   | a   | a       | a     | g        | g        | g    | g  | g      | g     | g       | g    | g     | g    |       | g      |          | g       |          |          | g         | g         |         |
| a            | 3426134      | t            | 3555314      | s                          | ?                                    | ?                          | +/-                        | c                 | c   | c   | c       | c     | c        | t        | t    | c  | c      | t     | t       | c    | t     | c    |       | c      |          | t       |          |          | c         | c         |         |
| a            | 3426161      | g            | 3555341      | s                          | a                                    | CFT073                     | ++                         | a                 | g   | a   | a       | a     | g        | g        | g    | g  | g      | g     | g       | g    | g     | g    |       | g      |          | g       |          |          | g         | g         |         |
| g            | 3426230      | a            | 3555410      | s                          | g                                    | CFT073                     | ++                         | g                 | a   | g   | g       | g     | a        | a        | a    | a  | a      | a     | a       | a    | a     | a    |       | a      |          | a       |          |          | a         | a         |         |
| a            | 3426233      | c            | 3555413      | s                          | a                                    | CFT073                     | ++                         | a                 | a   | a   | a       | a     | a        | c        | c    | c  | a      | a     | a       | c    | a     | c    |       | a      |          | a       |          |          | a         | a         |         |
| t            | 3426276      | a            | 3555456      | ns                         | t                                    | CFT073                     | ++                         | t                 | t   | t   | t       | t     | t        | a        | a    | a  | t      | t     | a       | a    | a     | a    |       | t      |          | a       |          |          | t         | t         |         |
| t            | 3426288      | c            | 3555468      | ns                         | t                                    | CFT073                     | ++                         | t                 | t   | t   | t       | t     | c        | c        | c    | c  | c      | c     | c       | c    | c     | c    |       | c      |          | c       |          |          | c         | c         |         |
| c            | 3426350      | t            | 3555530      | s                          | c                                    | CFT073                     | ++                         | c                 | c   | c   | c       | c     | c        | t        | t    | t  | c      | c     | a       | c    | a     | c    |       | c      |          | a       |          |          | c         | c         |         |
| a            | 3426412      | g            | 3555592      | s                          | a                                    | CFT073                     | ++                         | a                 | g   | a   | a       | a     | a        | g        | g    | g  | g      | g     | a       | g    | a     | g    |       | g      |          | g       |          |          | g         | g         |         |
| t            | 3426443      | g            | 3555623      | s                          | t                                    | CFT073                     | ++                         | t                 | g   | t   | t       | t     | g        | g        | g    | g  | g      | g     | g       | g    | g     | g    |       | g      |          | g       |          |          | g         | g         |         |
| a            | 3426514      | c            | 3555694      | ns                         | a                                    | CFT073                     | ++                         | a                 | c   | a   | a       | a     | a        | c        | c    | c  | c      | c     | c       | c    | c     | c    |       | c      |          | c       |          |          | c         | c         |         |
| c            | 3426646      | t            | 3555826      | nc                         | c                                    | CFT073                     | ++                         | c                 | c   | c   | c       | c     | c        | t        | t    | t  | c      | c     | t       | t    | t     | t    |       | c      |          | t       |          |          | t         | t         |         |
| t            | 3426949      | c            | 3556129      | s                          | c                                    | clone D                    | ++                         | c                 | c   | c   | c       | c     | c        | c        | c    | c  | c      | c     | c       | c    | c     | c    |       | c      |          | c       | c        |          | c         | c         |         |
| g            | 3427051      | t            | 3556231      | s                          | g                                    | CFT073                     | ++                         | g                 | g   | g   | g       | g     | g        | g        | g    | g  | g      | g     | g       | g    | g     | g    |       | g      |          | g       | g        |          | g         | g         |         |
| c            | 3427081      | t            | 3556261      | s                          | t                                    | clone D                    | ++                         | t                 | t   | t   | t       | t     | c        | t        | t    | t  | t      | t     | t       | t    | t     | t    |       | t      |          | t       | t        |          | t         | t         |         |



































| Clone D base | Clone D site | CFT 073 base | CFT 073 site | mutation type <sup>a</sup> | Inferred ancestral base <sup>b</sup> | lineage inferred to mutate | Support level <sup>c</sup> | ED1a <sup>d</sup> | 536 | S88 | APEC O1 | UT189 | E2348/69 | ATCC8739 | K-12 | HS | SMS3-5 | IAI39 | E24377A | SE11 | 55989 | IAI1 | Sakai | UMN026 | B4 Sb227 | F5 8401 | SS Ss046 | D1 Sd197 | B18 BS512 | F2a 2457T | F2a 301 |
|--------------|--------------|--------------|--------------|----------------------------|--------------------------------------|----------------------------|----------------------------|-------------------|-----|-----|---------|-------|----------|----------|------|----|--------|-------|---------|------|-------|------|-------|--------|----------|---------|----------|----------|-----------|-----------|---------|
| a            | 4145523      | g            | 4274472      | nc                         | g                                    | clone D                    | +                          | g                 |     |     |         |       | g        |          |      |    |        | g     |         |      |       | g    | g     | g      | g        | g       | g        | g        | g         | g         |         |
| t            | 4145529      | a            | 4274478      | nc                         | t                                    | CFT073                     | +                          | a                 |     |     |         | a     |          |          |      |    |        | t     |         |      |       | t    | t     | t      | t        | t       | t        | t        | t         | t         |         |
| g            | 4145540      | t            | 4274489      | nc                         | t                                    | clone D                    | +                          | t                 |     |     |         | g     |          |          |      |    |        | t     |         |      |       | g    |       |        | t        | t       | t        | t        | t         | t         | t       |
| a            | 4145547      | c            | 4274496      | nc                         | c                                    | clone D                    | +                          | c                 |     |     |         | a     |          |          |      |    |        | c     |         |      |       | a    |       |        | c        | c       | c        | c        | c         | c         | c       |
| a            | 4145551      | g            | 4274500      | nc                         | g                                    | clone D                    | +                          | g                 |     |     |         | g     |          |          |      |    |        | g     |         |      |       | a    |       |        | g        | a       | g        | g        | g         | g         | g       |
| c            | 4145552      | t            | 4274501      | nc                         | t                                    | clone D                    | +                          | t                 |     |     |         | t     |          |          |      |    |        | t     |         |      |       | t    |       |        | t        | t       | t        | t        | t         | t         | t       |
| g            | 4145561      | t            | 4274510      | nc                         | t                                    | clone D                    | +                          | t                 |     |     |         | g     |          |          |      |    |        | t     |         |      |       | g    |       |        | t        | t       | t        | t        | t         | t         | t       |
| t            | 4145562      | c            | 4274511      | nc                         | c                                    | clone D                    | +                          | c                 |     |     |         | c     |          |          |      |    |        | c     |         |      |       | t    |       |        | c        | c       | c        | c        | c         | c         | c       |
| g            | 4145568      | t            | 4274517      | nc                         | g                                    | CFT073                     | +                          | g                 |     |     |         | g     |          |          |      |    |        | g     |         |      |       | g    |       |        | g        | g       | g        | g        | g         | g         | g       |
| g            | 4145573      | a            | 4274522      | nc                         | a                                    | clone D                    | +                          | a                 |     |     |         | a     |          |          |      |    |        | a     |         |      |       | g    |       |        | a        | a       | a        | a        | a         | a         | a       |
| a            | 4145575      | t            | 4274524      | nc                         | t                                    | clone D                    | +                          | g                 |     |     |         | t     |          |          |      |    |        | t     |         |      |       | a    |       |        | t        | t       | t        | t        | t         | t         | t       |
| c            | 4145578      | a            | 4274527      | nc                         | a                                    | clone D                    | +                          | a                 |     |     |         | a     |          |          |      |    |        | a     |         |      |       | g    |       |        | a        | a       | a        | a        | a         | a         | a       |
| c            | 4145586      | t            | 4274535      | nc                         | t                                    | clone D                    | +                          | t                 |     |     |         | t     |          |          |      |    |        | t     |         |      |       |      |       |        | t        | t       | t        | t        | t         | t         | t       |
| c            | 4145587      | t            | 4274536      | nc                         | t                                    | clone D                    | +                          | t                 |     |     |         | t     |          |          |      |    |        | t     |         |      |       |      |       |        | t        | t       | t        | t        | t         | t         | t       |
| c            | 4145596      | a            | 4274544      | nc                         | a                                    | clone D                    | +                          | g                 |     |     |         | c     |          |          |      |    |        | a     |         |      |       |      |       |        | a        | a       | a        | a        | a         | a         | a       |
| a            | 4145599      | g            | 4274547      | nc                         | g                                    | clone D                    | +                          | g                 |     |     |         | g     |          |          |      |    |        | g     |         |      |       |      |       |        | g        | g       | g        | g        | g         | g         | g       |
| t            | 4145605      | c            | 4274553      | nc                         | c                                    | clone D                    | +                          | a                 |     |     |         | t     |          |          |      |    |        | c     |         |      |       |      |       |        | c        | c       | c        | c        | c         | c         | c       |
| g            | 4145621      | a            | 4274569      | nc                         | a                                    | clone D                    | +                          | a                 |     |     |         | a     |          |          |      |    |        | a     |         |      |       |      |       |        | a        | a       | a        | a        | a         | a         | a       |
| t            | 4145623      | g            | 4274571      | nc                         | g                                    | clone D                    | +                          | g                 |     |     |         | g     |          |          |      |    |        | g     |         |      |       |      |       |        | g        | g       | g        | g        | g         | g         | g       |
| g            | 4145634      | t            | 4274582      | nc                         | t                                    | clone D                    | +                          | g                 |     |     |         | t     |          |          |      |    |        | t     |         |      |       |      |       |        | t        | t       | t        | t        | t         | t         | t       |
| g            | 4145644      | c            | 4274592      | nc                         | c                                    | clone D                    | +                          | c                 |     |     |         | t     |          |          |      |    |        | c     |         |      |       |      |       |        | c        | c       | c        | c        | c         | c         | c       |
| g            | 4145647      | c            | 4274595      | nc                         | c                                    | clone D                    | +                          | t                 |     |     |         | t     |          |          |      |    |        | c     |         |      |       |      |       |        | c        | c       | c        | c        | c         | c         | c       |
| a            | 4145654      | c            | 4274602      | nc                         | c                                    | clone D                    | +                          | c                 |     |     |         | c     |          |          |      |    |        | c     |         |      |       |      |       |        | c        | c       | c        | c        | c         | c         | c       |
| g            | 4145655      | a            | 4274603      | nc                         | a                                    | clone D                    | +                          | a                 |     |     |         | a     |          |          |      |    |        | a     |         |      |       |      |       |        | a        | a       | a        | a        | a         | a         | a       |
| c            | 4145665      | t            | 4274613      | nc                         | t                                    | clone D                    | +                          | t                 |     |     |         | t     |          |          |      |    |        | t     |         |      |       |      |       |        | t        | t       | t        | t        | t         | t         | t       |
| t            | 4145670      | c            | 4274618      | nc                         | c                                    | clone D                    | +                          | c                 |     |     |         | c     |          |          |      |    |        | c     |         |      |       |      |       |        | c        | c       | c        | c        | c         | c         | c       |
| c            | 4145679      | t            | 4274627      | nc                         | t                                    | clone D                    | +                          | t                 |     |     |         | c     |          |          |      |    |        | t     |         |      |       |      | c     |        | t        | t       | t        | t        | t         | t         | t       |
| g            | 4145697      | a            | 4274645      | nc                         | a                                    | clone D                    | +                          | a                 |     |     |         |       |          |          |      |    |        | a     |         |      |       |      | g     |        | a        | a       | a        | a        | a         | a         | a       |

| Clone D base | Clone D site | CFT 073 base | CFT 073 site | mutation type <sup>a</sup> | Inferred ancestral base <sup>b</sup> | lineage inferred to mutate | Support level <sup>c</sup> | ED1a <sup>d</sup> | 536 | S88 | APEC O1 | UT189 | E2348/69 | ATCC8739 | K-12 | HS | SMS3-5 | IAI39 | E24377A | SE11 | 55989 | IAI1 | Sakai | UMN026 | B4 Sb227 | F5 8401 | SS Ss046 | D1 Sd197 | B18 BS512 | F2a 2457T | F2a 301 |
|--------------|--------------|--------------|--------------|----------------------------|--------------------------------------|----------------------------|----------------------------|-------------------|-----|-----|---------|-------|----------|----------|------|----|--------|-------|---------|------|-------|------|-------|--------|----------|---------|----------|----------|-----------|-----------|---------|
| g            | 4145723      | a            | 4274672      | nc                         | a                                    | clone D                    | +                          | a                 |     |     |         |       |          |          |      |    |        |       | a       |      |       |      | g     |        | a        | a       | a        |          | a         | a         |         |
| g            | 4145724      | c            | 4274673      | nc                         | c                                    | clone D                    | +                          | c                 |     |     |         |       |          |          |      |    |        |       | c       |      |       |      | g     |        | c        | c       | c        |          | c         | c         |         |
| g            | 4145728      | a            | 4274677      | nc                         | a                                    | clone D                    | +                          | a                 |     |     |         |       |          |          |      |    |        |       | a       |      |       |      | g     |        | a        | a       | a        |          | a         | a         |         |
| g            | 4145758      | a            | 4274707      | s                          | a                                    | clone D                    | +                          | a                 |     |     |         |       |          |          |      |    |        |       | a       |      |       |      | g     |        | a        | a       | a        |          | a         | a         |         |
| c            | 4145759      | t            | 4274708      | s                          | t                                    | clone D                    | +                          | t                 |     |     |         |       |          |          |      |    |        |       | t       |      |       |      | c     |        | t        | t       | t        |          | t         | t         |         |
| g            | 4145768      | a            | 4274717      | ns                         | a                                    | clone D                    | +                          | a                 |     |     |         |       |          |          |      |    |        |       | a       |      |       |      | g     |        | a        | a       | a        |          | a         | a         |         |
| t            | 4145770      | c            | 4274719      | ns                         | c                                    | clone D                    | +                          | c                 |     |     |         |       |          |          |      |    |        |       | c       |      |       |      | t     |        | c        | c       | c        |          | c         | c         |         |
| g            | 4145785      | a            | 4274734      | s                          | a                                    | clone D                    | +                          | a                 |     |     |         |       |          |          |      |    |        |       | a       |      |       |      | g     |        | a        | a       | a        |          | a         | a         |         |
| g            | 4145788      | a            | 4274737      | s                          | a                                    | clone D                    | +                          | a                 |     |     |         |       |          |          |      |    |        |       | a       |      |       |      | g     |        | a        | a       | a        |          | a         | a         |         |
| a            | 4145791      | c            | 4274740      | s                          | c                                    | clone D                    | +                          | a                 |     |     |         |       |          |          |      |    |        |       | c       |      |       |      | a     |        | c        | c       | c        |          | c         | c         |         |
| a            | 4145797      | c            | 4274746      | ns                         | c                                    | clone D                    | +                          | c                 |     |     |         |       |          |          |      |    |        |       | c       |      |       |      | a     |        | c        | c       | c        |          | c         | c         |         |
| g            | 4145800      | a            | 4274749      | s                          | a                                    | clone D                    | +                          | g                 |     |     |         |       |          |          |      |    |        |       | a       |      |       |      | g     |        | a        | a       | a        |          | a         | a         |         |
| g            | 4145812      | t            | 4274761      | s                          | t                                    | clone D                    | +                          | t                 |     |     |         |       |          |          |      |    |        |       | t       |      |       |      | g     |        | t        | t       | t        |          | t         | t         |         |
| a            | 4145819      | g            | 4274768      | ns                         | g                                    | clone D                    | +                          | g                 |     |     |         |       |          |          |      |    |        |       | g       |      |       |      | g     |        | g        | g       | g        |          | g         | g         |         |
| g            | 4145836      | a            | 4274785      | s                          | a                                    | clone D                    | +                          | a                 |     |     |         |       |          |          |      |    |        |       | a       |      |       |      | g     |        | a        | a       | a        |          | a         | a         |         |
| g            | 4145846      | a            | 4274795      | ns                         | a                                    | clone D                    | +                          | a                 |     |     |         |       |          |          |      |    |        |       | a       |      |       |      | g     |        | a        | a       | a        |          | a         | a         |         |
| c            | 4145857      | t            | 4274806      | s                          | t                                    | clone D                    | +                          | t                 |     |     |         |       |          |          |      |    |        |       | t       |      |       |      | c     |        | t        | t       | t        |          | t         | t         |         |
| t            | 4145869      | c            | 4274818      | s                          | c                                    | clone D                    | +                          | c                 |     |     |         |       |          |          |      |    |        |       | c       |      |       |      | t     |        | c        | c       | c        |          | c         | c         |         |
| c            | 4145884      | t            | 4274833      | s                          | t                                    | clone D                    | +                          | t                 |     |     |         |       |          |          |      |    |        |       | t       |      |       |      | c     |        | t        | t       | t        |          | t         | t         |         |
| g            | 4145893      | a            | 4274842      | s                          | a                                    | clone D                    | +                          | a                 |     |     |         |       |          |          |      |    |        |       | a       |      |       |      | a     |        | a        | a       | a        |          | a         | a         |         |
| g            | 4145905      | t            | 4274854      | s                          | t                                    | clone D                    | +                          | t                 |     |     |         |       |          |          |      |    |        |       | t       |      |       |      | g     |        | t        | t       | t        |          | t         | t         |         |
| t            | 4145917      | a            | 4274866      | s                          | a                                    | clone D                    | +                          | a                 |     |     |         |       |          |          |      |    |        |       | a       |      |       |      | a     |        | a        | a       | a        |          | a         | a         |         |
| t            | 4145935      | a            | 4274884      | s                          | a                                    | clone D                    | +                          | a                 |     |     |         |       |          |          |      |    |        |       | a       |      |       |      | t     |        | a        | a       | a        |          | a         | a         |         |
| c            | 4145941      | t            | 4274890      | s                          | t                                    | clone D                    | +                          | c                 |     |     |         |       |          |          |      |    |        |       | t       |      |       |      | c     |        | t        | t       | t        |          | t         | t         |         |
| t            | 4145947      | c            | 4274896      | s                          | c                                    | clone D                    | +                          | c                 |     |     |         |       |          |          |      |    |        |       | c       |      |       |      | t     |        | c        | c       | c        |          | c         | c         |         |
| a            | 4145972      | c            | 4274921      | ns                         | c                                    | clone D                    | +                          | a                 |     |     |         |       |          |          |      |    |        |       | c       |      |       |      | a     |        | c        | c       | c        |          | c         | c         |         |
| a            | 4145974      | c            | 4274923      | ns                         | c                                    | clone D                    | +                          | c                 |     |     |         |       |          |          |      |    |        |       | c       |      |       |      | a     |        | c        | c       | c        |          | c         | c         |         |
| t            | 4145977      | c            | 4274926      | s                          | c                                    | clone D                    | +                          | c                 |     |     |         |       |          |          |      |    |        |       | c       |      |       |      | t     |        | c        | c       | c        |          | c         | c         |         |

| Clone D base | Clone D site | CFT 073 base | CFT 073 site | mutation type <sup>a</sup> | Inferred ancestral base <sup>b</sup> | lineage inferred to mutate | Support level <sup>c</sup> | ED1a <sup>d</sup> | 536 | S88 | APEC O1 | UT189 | E2348/69 | ATCC8739 | K-12 | HS | SMS3-5 | IAI39 | E24377A | SE11 | 55989 | IAI1 | Sakai | UMN026 | B4 Sb227 | F5 8401 | SS Ss046 | D1 Sd197 | B18 BS512 | F2a 2457T | F2a 301 |
|--------------|--------------|--------------|--------------|----------------------------|--------------------------------------|----------------------------|----------------------------|-------------------|-----|-----|---------|-------|----------|----------|------|----|--------|-------|---------|------|-------|------|-------|--------|----------|---------|----------|----------|-----------|-----------|---------|
| g            | 4145980      | t            | 4274929      | s                          | t                                    | clone D                    | +                          | t                 |     |     |         |       |          |          |      |    |        | t     |         |      |       |      | g     |        | t        | t       | t        |          | t         | t         |         |
| t            | 4145986      | a            | 4274935      | s                          | a                                    | clone D                    | +                          | a                 |     |     |         |       |          |          |      |    |        | a     |         |      |       |      | t     |        | a        | a       | a        |          | a         | a         |         |
| g            | 4145995      | a            | 4274944      | s                          | a                                    | clone D                    | +                          | t                 |     |     |         |       |          |          |      |    |        | a     |         |      |       |      | g     |        | a        | a       | a        |          | a         | a         |         |
| t            | 4145998      | g            | 4274947      | s                          | g                                    | clone D                    | +                          | g                 |     |     |         |       |          |          |      |    |        | g     |         |      |       |      | t     |        | g        | g       | g        |          | g         | g         |         |
| a            | 4146010      | g            | 4274959      | s                          | g                                    | clone D                    | +                          | a                 |     |     |         |       |          |          |      |    |        | g     |         |      |       |      | a     |        | g        | g       | g        |          | g         | g         |         |
| t            | 4146027      | a            | 4274976      | ns                         | a                                    | clone D                    | +                          | t                 |     |     |         |       |          |          |      |    |        | a     |         |      |       |      | t     |        | a        | a       | a        |          | a         | a         |         |
| t            | 4146038      | c            | 4274987      | s                          | c                                    | clone D                    | +                          | t                 |     |     |         |       |          |          |      |    |        | c     |         |      |       |      | t     |        | c        | c       | c        |          | c         | c         |         |
| a            | 4146041      | c            | 4274990      | ns                         | a                                    | CFT073                     | +                          | a                 |     |     |         |       |          |          |      |    |        | a     |         |      |       |      | a     |        | a        | a       | a        |          | a         | a         |         |
| c            | 4146046      | t            | 4274995      | s                          | t                                    | clone D                    | +                          | c                 |     |     |         |       |          |          |      |    |        | t     |         |      |       |      | c     |        | t        | t       | t        |          | t         | t         |         |
| t            | 4146049      | g            | 4274998      | s                          | g                                    | clone D                    | +                          | g                 |     |     |         |       |          |          |      |    |        | g     |         |      |       |      | t     |        | g        | g       | g        |          | g         | g         |         |
| c            | 4146058      | t            | 4275007      | s                          | t                                    | clone D                    | +                          | t                 |     |     |         |       |          |          |      |    |        | t     |         |      |       |      | c     |        | t        | t       | t        |          | t         | t         |         |
| g            | 4146059      | a            | 4275008      | ns                         | a                                    | clone D                    | +                          | a                 |     |     |         |       |          |          |      |    |        | a     |         |      |       |      | g     |        | a        | a       | a        |          | a         | a         |         |
| g            | 4146070      | a            | 4275019      | s                          | a                                    | clone D                    | +                          | a                 |     |     |         |       |          |          |      |    |        | a     |         |      |       |      | g     |        | a        | a       | a        |          | a         | a         |         |
| t            | 4146076      | c            | 4275025      | s                          | c                                    | clone D                    | +                          | c                 |     |     |         |       |          |          |      |    |        | c     |         |      |       |      | t     |        | c        | c       | c        |          | c         | c         |         |
| g            | 4146082      | a            | 4275031      | s                          | a                                    | clone D                    | +                          | a                 |     |     |         |       |          |          |      |    |        | a     |         |      |       |      | g     |        | a        | a       | a        |          | a         | a         |         |
| c            | 4146094      | g            | 4275043      | s                          | g                                    | clone D                    | +                          | g                 |     |     |         |       |          |          |      |    |        | g     |         |      |       |      | c     |        | g        | g       | g        |          | g         | g         |         |
| c            | 4146124      | t            | 4275073      | s                          | t                                    | clone D                    | +                          | t                 |     |     |         |       |          |          |      |    |        | t     |         |      |       |      | c     |        | t        | t       |          | t        | t         |           |         |
| c            | 4146127      | t            | 4275076      | s                          | t                                    | clone D                    | +                          | t                 |     |     |         |       |          |          |      |    |        | t     |         |      |       |      | c     |        | t        | t       |          | t        | t         |           |         |
| t            | 4146142      | c            | 4275091      | s                          | c                                    | clone D                    | +                          | c                 |     |     |         |       |          |          |      |    |        | c     |         |      |       |      | t     |        | c        | c       |          | c        | c         |           |         |
| c            | 4146145      | t            | 4275094      | s                          | t                                    | clone D                    | +                          | t                 |     |     |         |       |          |          |      |    |        | t     |         |      |       |      | c     |        | t        | t       |          | t        | t         |           |         |
| c            | 4146157      | t            | 4275106      | s                          | t                                    | clone D                    | +                          | t                 |     |     |         |       |          |          |      |    |        | t     |         |      |       |      | c     |        | t        | t       |          | t        | t         |           |         |
| t            | 4146160      | c            | 4275109      | s                          | c                                    | clone D                    | +                          | t                 |     |     |         |       |          |          |      |    |        | c     |         |      |       |      | c     |        | c        | c       |          | c        | c         |           |         |
| t            | 4146175      | c            | 4275124      | s                          | c                                    | clone D                    | +                          | c                 |     |     |         |       |          |          |      |    |        | c     |         |      |       |      | c     |        | c        | c       |          | c        | c         |           |         |
| t            | 4146181      | c            | 4275130      | s                          | c                                    | clone D                    | +                          | a                 |     |     |         |       |          |          |      |    |        | c     |         |      |       |      | c     |        | c        | c       |          | c        | c         |           |         |
| a            | 4146193      | g            | 4275142      | s                          | g                                    | clone D                    | +                          | g                 |     |     |         |       |          |          |      |    |        | g     |         |      |       |      | g     |        | g        | g       |          | g        | g         |           |         |
| c            | 4146194      | t            | 4275143      | s                          | t                                    | clone D                    | +                          | t                 |     |     |         |       |          |          |      |    |        | t     |         |      |       |      | c     |        | t        | t       |          | t        | t         |           |         |
| c            | 4146211      | t            | 4275160      | s                          | t                                    | clone D                    | +                          | t                 |     |     |         |       |          |          |      |    |        | t     |         |      |       |      | t     |        | t        | t       |          | t        | t         |           |         |
| g            | 4146214      | a            | 4275163      | s                          | a                                    | clone D                    | +                          | a                 |     |     |         |       |          |          |      |    |        | a     |         |      |       |      | g     |        | a        | a       |          | a        | a         |           |         |



| Clone D base | Clone D site | CFT 073 base | CFT 073 site | mutation type <sup>a</sup> | Inferred ancestral base <sup>b</sup> | lineage inferred to mutate | Support level <sup>c</sup> | ED1a <sup>d</sup> | 536 | S88 | APEC O1 | UT189 | E2348/69 | ATCC8739 | K-12 | HS | SMS3-5 | IAI39 | E24377A | SE11 | 55989 | IAI1 | Sakai | UMN026 | B4 Sb227 | F5 8401 | SS Ss046 | D1 Sd197 | B18 BS512 | F2a 2457T | F2a 301 |
|--------------|--------------|--------------|--------------|----------------------------|--------------------------------------|----------------------------|----------------------------|-------------------|-----|-----|---------|-------|----------|----------|------|----|--------|-------|---------|------|-------|------|-------|--------|----------|---------|----------|----------|-----------|-----------|---------|
| g            | 4146220      | a            | 4275169      | s                          | a                                    | clone D                    | +                          | a                 |     |     |         |       |          |          |      |    |        |       | a       |      |       |      | g     |        | a        | a       |          |          | a         | a         |         |
| c            | 4146226      | t            | 4275175      | s                          | t                                    | clone D                    | +                          | t                 |     |     |         |       |          |          |      |    |        |       | t       |      |       |      | t     |        | t        | t       |          |          | t         | t         |         |
| g            | 4146232      | t            | 4275181      | s                          | t                                    | clone D                    | +                          | t                 |     |     |         |       |          |          |      |    |        |       | t       |      |       |      | a     |        | t        | t       |          |          | t         | t         |         |
| t            | 4146256      | c            | 4275205      | s                          | c                                    | clone D                    | +                          | c                 |     |     |         |       |          |          |      |    |        |       | c       |      |       |      | c     |        | c        | c       |          |          | c         | c         |         |
| a            | 4146271      | g            | 4275220      | s                          | g                                    | clone D                    | +                          | g                 |     |     |         |       |          |          |      |    |        |       | g       |      |       |      | g     |        | g        | g       |          |          | g         | g         |         |
| c            | 4146292      | t            | 4275241      | s                          | t                                    | clone D                    | +                          | t                 |     |     |         |       |          |          |      |    |        |       | t       |      |       |      | t     |        | t        | t       |          |          | t         | t         |         |
| a            | 4146299      | c            | 4275248      | s                          | c                                    | clone D                    | +                          | c                 |     |     |         |       |          |          |      |    |        |       | c       |      |       |      | c     |        | c        | c       |          |          | c         | c         |         |
| a            | 4146301      | g            | 4275250      | s                          | g                                    | clone D                    | +                          | g                 |     |     |         |       |          |          |      |    |        |       | g       |      |       |      | a     |        | g        | g       |          |          | g         | g         |         |
| t            | 4146304      | a            | 4275253      | s                          | a                                    | clone D                    | +                          | a                 |     |     |         |       |          |          |      |    |        |       | a       |      |       |      | c     |        | a        | a       |          |          | a         | a         |         |
| c            | 4146316      | a            | 4275265      | s                          | a                                    | clone D                    | +                          | t                 |     |     |         |       |          |          |      |    |        |       | a       |      |       |      | t     |        | a        | a       |          |          | a         | a         |         |
| t            | 4146319      | c            | 4275268      | s                          | c                                    | clone D                    | +                          | c                 |     |     |         |       |          |          |      |    |        |       | c       |      |       |      | t     |        | c        | c       |          |          | c         | c         |         |
| c            | 4146334      | t            | 4275283      | s                          | t                                    | clone D                    | +                          | t                 |     |     |         |       |          |          |      |    |        |       | t       |      |       |      | t     |        | t        | t       |          |          | t         | t         |         |
| g            | 4146337      | t            | 4275286      | s                          | t                                    | clone D                    | +                          | t                 |     |     |         |       |          |          |      |    |        |       | t       |      |       |      | t     |        | t        | t       |          |          | t         | t         |         |
| c            | 4146364      | t            | 4275313      | s                          | t                                    | clone D                    | +                          | t                 |     |     |         |       |          |          |      |    |        |       | t       |      |       |      | t     |        | t        | t       |          |          | t         | t         |         |
| c            | 4146370      | t            | 4275319      | s                          | t                                    | clone D                    | +                          | t                 |     |     |         |       |          |          |      |    |        |       | t       |      |       |      | t     |        | t        | t       |          |          | t         | t         |         |
| c            | 4146379      | t            | 4275328      | s                          | t                                    | clone D                    | +                          | t                 |     |     |         |       |          |          |      |    |        |       | t       |      |       |      | c     |        | t        | t       |          |          | t         | t         |         |
| t            | 4146391      | c            | 4275340      | s                          | c                                    | clone D                    | +                          | c                 |     |     |         |       |          |          |      |    |        |       | c       |      |       |      | c     |        | c        | c       |          |          | c         | c         |         |
| t            | 4146400      | c            | 4275349      | s                          | c                                    | clone D                    | +                          | c                 |     |     |         |       |          |          |      |    |        |       | c       |      |       |      | t     |        | c        | c       |          |          | c         | c         |         |
| c            | 4146424      | a            | 4275373      | s                          | a                                    | clone D                    | +                          | a                 |     |     |         |       |          |          |      |    |        |       | a       |      |       |      | a     |        | a        | a       |          |          | a         | a         |         |
| c            | 4146430      | a            | 4275379      | s                          | a                                    | clone D                    | +                          | c                 |     |     |         |       |          |          |      |    |        |       | a       |      |       |      | c     |        | a        | a       |          |          | a         | a         |         |
| g            | 4146436      | t            | 4275385      | s                          | t                                    | clone D                    | +                          | t                 |     |     |         |       |          |          |      |    |        |       | t       |      |       |      | t     |        | t        | t       |          |          | t         | t         |         |
| c            | 4146445      | t            | 4275394      | s                          | t                                    | clone D                    | +                          | t                 |     |     |         |       |          |          |      |    |        |       | t       |      |       |      | t     |        | t        | t       |          |          | t         | t         |         |
| t            | 4146469      | c            | 4275418      | s                          | c                                    | clone D                    | +                          | t                 |     |     |         |       |          |          |      |    |        |       | c       |      |       |      | t     |        | c        | c       |          |          | c         | c         |         |
| c            | 4146475      | a            | 4275424      | s                          | a                                    | clone D                    | +                          | c                 |     |     |         |       |          |          |      |    |        |       | a       |      |       |      | a     |        | a        | a       |          |          | a         | a         |         |
| g            | 4146478      | a            | 4275427      | s                          | a                                    | clone D                    | +                          | a                 |     |     |         |       |          |          |      |    |        |       | a       |      |       |      | g     |        | a        | a       |          |          | a         | a         |         |
| a            | 4146487      | g            | 4275436      | s                          | g                                    | clone D                    | +                          | g                 |     |     |         |       |          |          |      |    |        |       | g       |      |       |      | g     |        | g        | g       |          |          | g         | g         |         |
| c            | 4146493      | t            | 4275442      | s                          | t                                    | clone D                    | +                          | c                 |     |     |         |       |          |          |      |    |        |       | t       |      |       |      | c     |        | t        | t       |          |          | t         | t         |         |
| g            | 4146505      | a            | 4275454      | s                          | a                                    | clone D                    | +                          | g                 |     |     |         |       |          |          |      |    |        |       | a       |      |       |      | g     |        | a        | a       |          |          | a         | a         |         |

| Clone D base | Clone D site | CFT 073 base | CFT 073 site | mutation type <sup>a</sup> | Inferred ancestral base <sup>b</sup> | lineage inferred to mutate | Support level <sup>c</sup> | ED1a <sup>d</sup> | 536 | S88 | APEC O1 | UT189 | E2348/69 | ATCC8739 | K-12 | HS | SMS3-5 | IAI39 | E24377A | SE11 | 55989 | IAI1 | Sakai | UMN026 | B4 Sb227 | F5 8401 | SS Ss046 | D1 Sd197 | B18 BS512 | F2a 2457T | F2a 301 |
|--------------|--------------|--------------|--------------|----------------------------|--------------------------------------|----------------------------|----------------------------|-------------------|-----|-----|---------|-------|----------|----------|------|----|--------|-------|---------|------|-------|------|-------|--------|----------|---------|----------|----------|-----------|-----------|---------|
| a            | 4146511      | c            | 4275460      | s                          | c                                    | clone D                    | +                          | c                 |     |     |         |       |          |          |      |    |        |       | c       |      |       |      | t     |        | c        | c       |          |          | c         | c         |         |
| c            | 4146527      | t            | 4275476      | s                          | t                                    | clone D                    | +                          | t                 |     |     |         |       |          |          |      |    |        |       | t       |      |       |      | t     |        | t        | t       |          |          | t         | t         |         |
| a            | 4146529      | g            | 4275478      | s                          | g                                    | clone D                    | +                          | g                 |     |     |         |       |          |          |      |    |        |       | g       |      |       |      | a     |        | g        | g       |          |          | g         | g         |         |
| g            | 4146550      | a            | 4275499      | s                          | a                                    | clone D                    | +                          | a                 |     |     |         |       |          |          |      |    |        |       | a       |      |       |      | a     |        | a        | a       |          |          | a         | a         |         |
| a            | 4146562      | g            | 4275511      | s                          | g                                    | clone D                    | +                          | g                 |     |     |         |       |          |          |      |    |        |       | g       |      |       |      | a     |        | g        | g       |          |          | g         | g         |         |
| g            | 4146565      | a            | 4275514      | s                          | a                                    | clone D                    | +                          | a                 |     |     |         |       |          |          |      |    |        |       | a       |      |       |      | g     |        | a        | a       |          |          | a         | a         |         |
| c            | 4146568      | t            | 4275517      | s                          | t                                    | clone D                    | +                          | t                 |     |     |         |       |          |          |      |    |        |       | t       |      |       |      | t     |        | t        | t       |          |          | t         | t         |         |
| a            | 4146586      | t            | 4275535      | s                          | t                                    | clone D                    | +                          | t                 |     |     |         |       |          |          |      |    |        |       | t       |      |       |      | t     |        | t        | t       |          |          | t         | t         |         |
| a            | 4146589      | g            | 4275538      | s                          | g                                    | clone D                    | +                          | g                 |     |     |         |       |          |          |      |    |        |       | g       |      |       |      | g     |        | g        | g       |          |          | g         | g         |         |
| t            | 4146595      | c            | 4275544      | s                          | c                                    | clone D                    | +                          | c                 |     |     |         |       |          |          |      |    |        |       | t       |      |       |      | t     |        | c        | c       |          |          | c         | c         |         |
| c            | 4146600      | t            | 4275549      | ns                         | t                                    | clone D                    | +                          | c                 |     |     |         |       |          |          |      |    |        |       | t       |      |       |      | c     |        | t        | t       |          |          | t         | t         |         |
| g            | 4146604      | a            | 4275553      | s                          | a                                    | clone D                    | +                          | a                 |     |     |         |       |          |          |      |    |        |       | a       |      |       |      | a     |        | a        | a       |          |          | a         | a         |         |
| a            | 4146610      | g            | 4275559      | s                          | g                                    | clone D                    | +                          | g                 |     |     |         |       |          |          |      |    |        |       | g       |      |       |      | g     |        | g        | g       |          |          | g         | g         |         |
| g            | 4146622      | a            | 4275571      | s                          | a                                    | clone D                    | +                          | a                 |     |     |         |       |          |          |      |    |        |       | a       |      |       |      | a     |        | a        | a       |          |          | a         | a         |         |
| a            | 4146625      | c            | 4275574      | s                          | c                                    | clone D                    | +                          | c                 |     |     |         |       |          |          |      |    |        |       | c       |      |       |      | c     |        | c        | c       |          |          | c         | c         |         |
| g            | 4146640      | c            | 4275589      | s                          | c                                    | clone D                    | +                          | t                 |     |     |         |       |          |          |      |    |        |       | c       |      |       |      | t     |        | c        | c       |          |          | c         | c         |         |
| g            | 4146643      | a            | 4275592      | s                          | a                                    | clone D                    | +                          | g                 |     |     |         |       |          |          |      |    |        |       | a       |      |       |      | g     |        | a        | a       |          |          | a         | a         |         |
| c            | 4146655      | t            | 4275604      | s                          | t                                    | clone D                    | +                          | t                 |     |     |         |       |          |          |      |    |        |       | t       |      |       |      | t     |        | t        | t       |          |          | t         | t         |         |
| c            | 4146661      | t            | 4275610      | s                          | t                                    | clone D                    | +                          | t                 |     |     |         |       |          |          |      |    |        |       | t       |      |       |      | c     |        | t        | t       |          |          | t         | t         |         |
| g            | 4146673      | a            | 4275622      | s                          | a                                    | clone D                    | +                          | g                 |     |     |         |       |          |          |      |    |        |       | a       |      |       |      | g     |        | a        | a       |          |          | a         | a         |         |
| t            | 4146676      | a            | 4275625      | s                          | a                                    | clone D                    | +                          | a                 |     |     |         |       |          |          |      |    |        |       | a       |      |       |      | a     |        | a        | a       |          |          | a         | a         |         |
| c            | 4146679      | t            | 4275628      | s                          | t                                    | clone D                    | +                          | t                 |     |     |         |       |          |          |      |    |        |       | t       |      |       |      | t     |        | t        | t       |          |          | t         | t         |         |
| t            | 4146691      | c            | 4275640      | s                          | c                                    | clone D                    | +                          | c                 |     |     |         |       |          |          |      |    |        |       | c       |      |       |      | c     |        | c        | c       |          |          | c         | c         |         |
| g            | 4146692      | a            | 4275641      | ns                         | a                                    | clone D                    | +                          | a                 |     |     |         |       |          |          |      |    |        |       | a       |      |       |      | a     |        | a        | a       |          |          | a         | a         |         |
| t            | 4146697      | c            | 4275646      | s                          | c                                    | clone D                    | +                          | c                 |     |     |         |       |          |          |      |    |        |       | t       |      |       |      | c     |        | c        | c       |          |          | c         | c         |         |
| g            | 4146700      | a            | 4275649      | s                          | a                                    | clone D                    | +                          | a                 |     |     |         |       |          |          |      |    |        |       | a       |      |       |      | g     |        | a        | a       |          |          | a         | a         |         |
| t            | 4146703      | a            | 4275652      | s                          | a                                    | clone D                    | +                          | t                 |     |     |         |       |          |          |      |    |        |       | a       |      |       |      | c     |        | a        | a       |          |          | a         | a         |         |
| c            | 4146706      | t            | 4275655      | s                          | t                                    | clone D                    | +                          | t                 |     |     |         |       |          |          |      |    |        |       | t       |      |       |      | t     |        | t        | t       |          |          | t         | t         |         |

| Clone D base | Clone D site | CFT 073 base | CFT 073 site | mutation type <sup>a</sup> | Inferred ancestral base <sup>b</sup> | lineage inferred to mutate | Support level <sup>c</sup> | ED1a <sup>d</sup> | 536 | S88 | APEC O1 | UT189 | E2348/69 | ATCC8739 | K-12 | HS | SMS3-5 | IAI39 | E24377A | SE11 | 55989 | IAI1 | Sakai | UMN026 | B4 Sb227 | F5 8401 | SS Ss046 | D1 Sd197 | B18 BS512 | F2a 2457T | F2a 301 |
|--------------|--------------|--------------|--------------|----------------------------|--------------------------------------|----------------------------|----------------------------|-------------------|-----|-----|---------|-------|----------|----------|------|----|--------|-------|---------|------|-------|------|-------|--------|----------|---------|----------|----------|-----------|-----------|---------|
| g            | 4146715      | t            | 4275664      | s                          | t                                    | clone D                    | +                          | a                 |     |     |         |       |          |          |      |    |        | t     |         |      |       | g    |       | t      | t        |         |          | t        | t         |           |         |
| a            | 4146724      | g            | 4275673      | s                          | g                                    | clone D                    | +                          | a                 |     |     |         |       |          |          |      |    |        | g     |         |      |       | g    |       | g      | g        |         |          | g        | g         |           |         |
| c            | 4146727      | a            | 4275676      | s                          | a                                    | clone D                    | +                          | a                 |     |     |         |       |          |          |      |    |        | a     |         |      |       | a    |       | a      | a        |         |          | a        | a         |           |         |
| g            | 4146730      | a            | 4275679      | s                          | a                                    | clone D                    | +                          | a                 |     |     |         |       |          |          |      |    |        | a     |         |      |       | a    |       | a      | a        |         |          | a        | a         |           |         |
| g            | 4146733      | c            | 4275682      | s                          | c                                    | clone D                    | +                          | c                 |     |     |         |       |          |          |      |    |        | c     |         |      |       | c    |       | c      | c        |         |          | c        | c         |           |         |
| g            | 4146736      | a            | 4275685      | s                          | a                                    | clone D                    | +                          | a                 |     |     |         |       |          |          |      |    |        | a     |         |      |       | a    |       | a      | a        |         |          | a        | a         |           |         |
| c            | 4146749      | a            | 4275698      | s                          | a                                    | clone D                    | +                          | a                 |     |     |         |       |          |          |      |    |        | a     |         |      |       | a    |       | a      | a        |         |          | a        | a         |           |         |
| c            | 4146751      | a            | 4275700      | s                          | a                                    | clone D                    | +                          | a                 |     |     |         |       |          |          |      |    |        | a     |         |      |       | g    |       | a      | a        |         |          | a        | a         |           |         |
| g            | 4146757      | c            | 4275706      | s                          | c                                    | clone D                    | +                          | t                 |     |     |         |       |          |          |      |    |        | c     |         |      |       | c    |       | c      | c        |         |          | c        | c         |           |         |
| t            | 4146766      | a            | 4275715      | s                          | a                                    | clone D                    | +                          | a                 |     |     |         |       |          |          |      |    |        | a     |         |      |       | a    |       | a      | a        |         |          | a        | a         |           |         |
| a            | 4146779      | c            | 4275728      | ns                         | c                                    | clone D                    | +                          | c                 |     |     |         |       |          |          |      |    |        | c     |         |      |       | c    |       | c      | c        |         |          | c        | c         |           |         |
| c            | 4146790      | t            | 4275739      | s                          | t                                    | clone D                    | +                          | t                 |     |     |         |       |          |          |      |    |        | c     |         |      |       | t    |       | t      | t        |         |          | t        | t         |           |         |
| a            | 4146793      | c            | 4275742      | s                          | c                                    | clone D                    | +                          | c                 |     |     |         |       |          |          |      |    |        | c     |         |      |       | t    |       | c      | c        |         |          | c        | c         |           |         |
| g            | 4146796      | c            | 4275745      | s                          | c                                    | clone D                    | +                          | c                 |     |     |         |       |          |          |      |    |        | c     |         |      |       | c    |       | c      | c        |         |          | c        | c         |           |         |
| c            | 4146807      | t            | 4275756      | ns                         | t                                    | clone D                    | +                          | c                 |     |     |         |       |          |          |      |    |        | t     |         |      |       | t    |       | t      | t        |         |          | t        | t         |           |         |
| g            | 4163785      | t            | 4341851      | nc                         | ?                                    | ?                          | +/-                        | a                 | t   | a   | a       | a     |          |          |      |    |        | t     |         |      |       | t    |       | t      |          |         |          |          |           |           |         |
| c            | 4163807      | t            | 4341873      | nc                         | t                                    | clone D                    | ++                         | t                 | t   | t   | t       | t     |          |          |      |    |        | t     |         |      |       | t    |       | t      |          |         |          |          |           |           |         |
| a            | 4163808      | c            | 4341874      | nc                         | c                                    | clone D                    | ++                         | c                 | c   | c   | c       | c     |          |          |      |    |        | c     |         |      |       | c    |       | c      |          |         |          |          |           |           |         |
| t            | 4163809      | c            | 4341875      | nc                         | ?                                    | ?                          | +/-                        | a                 | c   | a   | a       | a     |          |          |      |    |        | c     |         |      |       | c    |       | c      |          |         |          |          |           |           |         |
| a            | 4163816      | g            | 4341882      | nc                         | a                                    | CFT073                     | ++                         | a                 | a   | a   | a       | a     |          |          |      |    |        | g     |         |      |       | c    |       | c      |          |         |          |          |           |           |         |
| a            | 4163819      | t            | 4341885      | nc                         | t                                    | clone D                    | ++                         | t                 | t   | t   | t       | t     |          |          |      |    |        | t     |         |      |       | t    |       | t      |          |         |          |          |           |           |         |
| a            | 4163826      | t            | 4341892      | nc                         | t                                    | clone D                    | ++                         | t                 | t   | t   | t       | t     |          |          |      |    |        | t     |         |      |       | t    |       | t      |          |         |          |          |           |           |         |
| t            | 4163828      | a            | 4341894      | nc                         | ?                                    | ?                          | +/-                        | -                 | a   | -   | -       | -     |          |          |      |    |        | a     |         |      |       | a    |       | a      |          |         |          |          |           |           |         |
| t            | 4163836      | a            | 4341902      | nc                         | t                                    | CFT073                     | ++                         | t                 | t   | t   | t       | t     |          |          |      |    |        | a     |         |      |       | t    |       | t      |          |         |          |          |           |           |         |
| a            | 4163838      | c            | 4341904      | nc                         | a                                    | CFT073                     | ++                         | a                 | t   | a   | a       | a     |          |          |      |    |        | c     |         |      |       | c    |       | c      |          |         |          |          |           |           |         |
| c            | 4163845      | a            | 4341911      | nc                         | c                                    | CFT073                     | ++                         | c                 | a   | c   | c       | c     |          |          |      |    |        | a     |         |      |       | a    |       | a      |          |         |          |          |           |           |         |
| a            | 4163846      | c            | 4341912      | nc                         | a                                    | CFT073                     | ++                         | a                 | c   | a   | a       | a     |          |          |      |    |        | c     |         |      |       | a    |       | a      |          |         |          |          |           |           |         |
| t            | 4163847      | c            | 4341913      | nc                         | t                                    | CFT073                     | ++                         | t                 | t   | t   | t       | t     |          |          |      |    |        | t     |         |      |       | t    |       | t      |          |         |          |          |           |           |         |



| Clone D base | Clone D site | CFT 073 base | CFT 073 site | mutation type <sup>a</sup> | Inferred ancestral base <sup>b</sup> | lineage inferred to mutate | Support level <sup>c</sup> | ED1a <sup>d</sup> | 536 | S88 | APEC O1 | UT189 | E2348/69 | ATCC8739 | K-12 | HS | SMS3-5 | IAI39 | E24377A | SE11 | 55989 | IAI1 | Sakai | UMN026 | B4 Sb227 | F5 8401 | SS Ss046 | D1 Sd197 | B18 BS512 | F2a 2457T | F2a 301 |   |
|--------------|--------------|--------------|--------------|----------------------------|--------------------------------------|----------------------------|----------------------------|-------------------|-----|-----|---------|-------|----------|----------|------|----|--------|-------|---------|------|-------|------|-------|--------|----------|---------|----------|----------|-----------|-----------|---------|---|
| g            | 4266931      | c            | 4445000      | nc                         | g                                    | CFT073                     | ++++                       | g                 | g   | g   | g       | g     | g        | g        | c    | g  | g      | g     | g       | g    | c     | c    | g     | c      | c        | g       | c        | c        | c         | c         | c       |   |
| g            | 4266952      | a            | 4445021      | nc                         | g                                    | CFT073                     | ++++                       | g                 | g   | g   | g       | g     | g        | g        | a    | g  | g      | g     | g       | g    | g     | g    | g     | g      | g        | g       | g        | g        | g         | g         | g       | g |
| t            | 4266983      | c            | 4445052      | nc                         | c                                    | clone D                    | ++++                       | c                 | c   | t   | c       | c     | c        | c        | c    | c  | c      | t     | t       | t    | t     | t    | c     | c      | t        | t       | c        | c        | t         | t         | t       |   |
| t            | 4267209      | g            | 4445280      | nc                         | t                                    | CFT073                     | ++                         | t                 | t   | t   | c       | c     | t        | g        | g    | g  | t      | t     | g       | g    | g     | g    | g     | c      | g        | g       | g        | t        | g         | g         | g       |   |
| a            | 4267837      | g            | 4445908      | nc                         | a                                    | CFT073                     | ++++                       | a                 | a   | a   | a       | a     | a        | g        | g    | g  | g      | a     | g       | a    | g     | g    | a     | a      | g        | g       | g        | a        | a         | g         | g       |   |
| t            | 4267843      | c            | 4445915      | nc                         | t                                    | CFT073                     | ++++                       | t                 | t   | t   | t       | t     | t        | c        | c    | c  | c      | t     | c       | t    | c     | c    | t     | t      | c        | c       | c        | t        | t         | c         | c       |   |
| t            | 4267876      | c            | 4445948      | nc                         | t                                    | CFT073                     | ++++                       | t                 | t   | t   | t       | t     | t        | t        | c    | t  | t      | t     | t       | t    | t     | t    | c     | t      | t        | t       | t        | c        | t         | t         | t       |   |
| g            | 4267884      | t            | 4445956      | nc                         | g                                    | CFT073                     | ++++                       | g                 | t   | g   | g       | g     | g        | t        | t    | t  | t      | t     | t       | t    | t     | t    | t     | t      | t        | t       | t        | t        | t         | t         | t       |   |
| c            | 4267885      | g            | 4445957      | nc                         | c                                    | CFT073                     | ++                         | c                 | g   | c   | c       | c     | c        | g        | g    | g  | a      | a     | g       | a    | a     | g    | g     | a      | g        | g       | g        | a        | a         | g         | g       |   |
| g            | 4267894      | c            | 4445966      | nc                         | g                                    | CFT073                     | ++                         | g                 | c   | g   | g       | g     | g        | c        | c    | c  | t      | t     | c       | t    | t     | c    | c     | t      | t        | t       | c        | t        | t         | t         | t       |   |
| t            | 4267895      | a            | 4445967      | nc                         | t                                    | CFT073                     | ++++                       | t                 | a   | t   | t       | t     | t        | a        | a    | a  | a      | a     | a       | a    | a     | a    | a     | a      | a        | a       | a        | a        | a         | a         | a       |   |
| c            | 4268171      | t            | 4446243      | nc                         | c                                    | CFT073                     | ++++                       | c                 | t   | c   | c       | c     | c        | t        | t    | t  | t      | t     | t       | t    | t     | t    | t     | t      | t        | t       | t        | t        | c         | t         | t       |   |
| g            | 4268213      | a            | 4446285      | nc                         | g                                    | CFT073                     | ++++                       | g                 | a   | g   | g       | g     | g        | a        | a    | a  | a      | a     | a       | a    | a     | a    | a     | a      | a        | a       | a        | a        | a         | a         | a       | a |
| t            | 4269751      | g            | 4447824      | nc                         | t                                    | CFT073                     | ++++                       | t                 | t   | t   | t       | t     | t        | t        | t    | t  | t      | t     | t       | t    | t     | t    | t     | t      | t        | t       | t        | t        | t         | t         | t       | t |
| c            | 4270509      | t            | 4448582      | s                          | c                                    | CFT073                     | ++++                       | c                 | c   | c   | c       | c     | c        | c        | c    | c  | c      | c     | c       | c    | c     | c    | c     | c      | c        | c       | c        | c        | c         | c         | c       | c |
| a            | 4289827      | c            | 4467901      | ns                         | c                                    | clone D                    | ++++                       | c                 | c   | c   | c       | c     | c        | c        | c    | c  | c      | c     | c       | c    | c     | c    | c     | c      | c        | c       | c        | c        | c         | c         | c       | c |
| g            | 4323599      | a            | 4501680      | s                          | g                                    | CFT073                     | ++++                       | g                 | g   | g   | g       | g     | g        | g        | g    | g  | g      | g     | g       | g    | g     | g    | g     | g      | g        | g       | g        | g        | g         | g         | g       | g |
| a            | 4383374      | g            | 4561456      | nc                         | a                                    | CFT073                     | ++++                       | a                 | a   | a   | g       | a     | a        | a        | a    | a  | a      | a     | a       | a    | a     | a    | a     | a      | a        | a       | a        | a        | a         | a         | a       | a |
| a            | 4383463      | g            | 4561545      | nc                         | g                                    | clone D                    | ++++                       | g                 | g   | g   | g       | g     | g        | g        | g    | g  | g      | g     | g       | g    | g     | g    | g     | g      | g        | g       | g        | g        | g         | g         | g       | g |
| a            | 4384669      | t            | 4562751      | nc                         | a                                    | CFT073                     | ++++                       | a                 | a   | t   | t       | t     | a        | a        | t    | t  | g      | a     | a       | a    | t     | t    | a     | t      | a        | t       | a        | a        | a         | t         | t       | t |
| c            | 4384675      | a            | 4562757      | nc                         | a                                    | clone D                    | ++                         | a                 | a   | t   | a       | t     | a        | c        | a    | c  | c      | c     | c       | c    | c     | a    | a     | c      | a        | c       | t        | c        | t         | c         | t       | t |
| g            | 4385091      | a            | 4563256      | nc                         | g                                    | CFT073                     | ++++                       | g                 | a   | g   | a       | g     | g        | a        | a    | a  | a      | a     | a       | a    | a     | a    | a     | a      | a        | a       | a        | a        | a         | a         | a       | a |
| g            | 4385272      | c            | 4563437      | nc                         | g                                    | CFT073                     | ++++                       | g                 | g   | g   | c       | g     | g        | c        | c    | g  | g      | c     | g       | c    | c     | c    | g     | g      | c        | c       | c        | c        | c         | c         | c       | c |
| g            | 4386383      | t            | 4564552      | nc                         | g                                    | CFT073                     | ++++                       | g                 | g   | g   | t       | g     | g        | g        | g    | g  | g      | g     | g       | g    | g     | g    | g     | g      | g        | g       | g        | g        | g         | g         | g       | g |
| g            | 4386427      | a            | 4564596      | nc                         | g                                    | CFT073                     | ++++                       | g                 | g   | g   | a       | g     | g        | g        | g    | g  | g      | g     | g       | g    | g     | g    | g     | g      | g        | g       | g        | g        | g         | g         | g       | g |
| c            | 4386512      | t            | 4564681      | nc                         | c                                    | CFT073                     | ++++                       | c                 | c   | c   | t       | c     | c        | t        | t    | t  | t      | t     | t       | t    | t     | c    | t     | t      | c        | t       | t        | t        | c         | t         | t       | t |
| g            | 4386554      | a            | 4564723      | nc                         | g                                    | CFT073                     | ++++                       | g                 | g   | g   | a       | g     | g        | a        | a    | a  | a      | a     | a       | a    | a     | a    | a     | a      | a        | a       | a        | a        | a         | a         | a       | a |
| g            | 4386875      | c            | 4565044      | nc                         | g                                    | CFT073                     | ++                         | g                 | g   | g   | c       | g     | g        | g        | c    | c  | g      | g     | c       | c    | c     | c    | c     | c      | c        | c       | -        | -        | c         | c         | c       | - |



| Clone D base | Clone D site | CFT 073 base | CFT 073 site | mutation type <sup>a</sup> | Inferred ancestral base <sup>b</sup> | lineage inferred to mutate | Support level <sup>c</sup> | ED1a <sup>d</sup> | 536 | S88 | APEC O1 | UT189 | E2348/69 | ATCC8739 | K-12 | HS | SMS3-5 | IAI39 | E24377A | SE11 | 55989 | IAI1 | Sakai | UMN026 | B4 Sb227 | F5 8401 | SS Ss046 | D1 Sd197 | B18 BS512 | F2a 2457T | F2a 301 |   |   |
|--------------|--------------|--------------|--------------|----------------------------|--------------------------------------|----------------------------|----------------------------|-------------------|-----|-----|---------|-------|----------|----------|------|----|--------|-------|---------|------|-------|------|-------|--------|----------|---------|----------|----------|-----------|-----------|---------|---|---|
| t            | 4523197      | c            | 4701369      | nc                         | c                                    | clone D                    | ++++                       | c                 | c   | c   | c       | c     | c        | c        | c    | c  | c      | t     | c       | t    | c     | c    | c     | c      | t        | t       | t        | c        | t         | t         | t       |   |   |
| a            | 4523237      | g            | 4701409      | nc                         | a                                    | CFT073                     | ++++                       | a                 | g   | a   | g       | a     | a        | g        | g    | g  | a      | a     | g       | g    | a     | g    | g     | a      | a        | a       | a        | a        | a         | a         | a       | a |   |
| t            | 4523238      | c            | 4701410      | nc                         | c                                    | clone D                    | ++                         | c                 | c   | t   | c       | t     | t        | c        | c    | c  | c      | c     | c       | c    | c     | t    | c     | c      | c        | t       | c        | t        | t         | t         | c       | c |   |
| t            | 4523423      | g            | 4701596      | nc                         | t                                    | CFT073                     | ++                         | t                 | g   | c   | g       | c     | t        | c        | g    | g  | t      | t     | g       | g    | g     | g    | g     | t      | g        | g       | g        | c        | g         | g         | g       |   |   |
| a            | 4524051      | g            | 4702224      | nc                         | a                                    | CFT073                     | ++++                       | a                 | g   | a   | g       | a     | a        | g        | g    | g  | a      | a     | a       | a    | g     | g    | a     | g      | g        | g       | g        | a        | a         | g         | g       |   |   |
| t            | 4524057      | c            | 4702231      | nc                         | t                                    | CFT073                     | ++++                       | t                 | c   | t   | c       | t     | t        | c        | c    | c  | t      | t     | t       | t    | c     | c    | t     | c      | c        | c       | c        | c        | t         | t         | c       | c |   |
| t            | 4524090      | c            | 4702264      | nc                         | t                                    | CFT073                     | ++++                       | t                 | c   | t   | c       | t     | t        | t        | c    | c  | t      | t     | t       | t    | c     | c    | t     | c      | t        | t       | c        | t        | t         | t         | t       | t |   |
| g            | 4524098      | t            | 4702272      | nc                         | g                                    | CFT073                     | ++++                       | g                 | t   | g   | t       | g     | g        | t        | t    | t  | t      | t     | t       | t    | t     | t    | t     | t      | t        | t       | t        | t        | t         | t         | t       | t |   |
| c            | 4524099      | g            | 4702273      | nc                         | c                                    | CFT073                     | ++                         | c                 | g   | c   | g       | c     | c        | g        | g    | g  | a      | a     | a       | a    | g     | g    | g     | g      | g        | g       | g        | g        | a         | a         | g       | g |   |
| g            | 4524108      | c            | 4702282      | nc                         | g                                    | CFT073                     | ++                         | g                 | c   | g   | c       | g     | g        | c        | c    | c  | t      | t     | t       | t    | c     | c    | c     | c      | t        | t       | c        | t        | t         | t         | t       | t |   |
| t            | 4524109      | a            | 4702283      | nc                         | t                                    | CFT073                     | ++++                       | t                 | a   | t   | a       | t     | t        | a        | a    | a  | a      | a     | a       | a    | a     | a    | a     | a      | a        | a       | a        | a        | a         | a         | a       | a |   |
| c            | 4524385      | t            | 4702559      | nc                         | c                                    | CFT073                     | ++++                       | c                 | t   | c   | t       | c     | c        | t        | t    | c  | t      | t     | t       | t    | t     | t    | t     | t      | c        | t       | t        | t        | c         | t         | t       | t |   |
| g            | 4524427      | a            | 4702601      | nc                         | g                                    | CFT073                     | ++++                       | g                 | a   | g   | a       | g     | g        | a        | a    | a  | a      | a     | a       | a    | a     | a    | a     | a      | a        | a       | a        | a        | a         | a         | a       | a |   |
| a            | 4524486      | c            | 4702660      | nc                         | c                                    | clone D                    | ++++                       | c                 | c   | c   | c       | c     | c        | c        | c    | c  | c      | c     | c       | c    | c     | c    | c     | c      | c        | c       | c        | c        | c         | c         | c       | c |   |
| t            | 4524750      | c            | 4702923      | nc                         | c                                    | clone D                    | ++                         | c                 | c   | g   | c       | g     | g        | c        | c    | c  | g      | g     | c       | c    | c     | c    | c     | g      | c        | c       | c        | c        | c         | c         | c       | c |   |
| c            | 4525066      | t            | 4703238      | nc                         | t                                    | clone D                    | ++++                       | t                 | t   | t   | t       | t     | t        | t        | t    | t  | t      | t     | t       | t    | t     | t    | t     | t      | t        | t       | t        | t        | t         | t         | t       | t |   |
| t            | 4526087      | c            | 4704259      | nc                         | c                                    | clone D                    | ++++                       | c                 | c   | c   | c       | c     | c        | c        | c    | c  | c      | c     | c       | c    | c     | c    | c     | c      | c        | c       | c        | c        | c         | c         | c       | c |   |
| g            | 4561232      | a            | 4739404      | nc                         | a                                    | clone D                    | ++                         | a                 | a   | g   | a       | g     | g        | g        | g    | a  | g      | g     | g       | g    | g     | g    | a     | g      | g        | g       | g        | g        | a         | g         | g       | g |   |
| t            | 4561235      | g            | 4739407      | nc                         | g                                    | clone D                    | ++                         | g                 | g   | g   | g       | g     | a        | g        | g    | g  | g      | a     | g       | g    | a     | g    | g     | g      | t        | a       | a        | g        | a         | g         | g       |   |   |
| a            | 4561246      | c            | 4739418      | nc                         | c                                    | clone D                    | ++                         | c                 | c   | t   | c       | c     | t        | c        | c    | c  | c      | t     | t       | c    | t     | c    | c     | c      | a        | t       | t        | c        | t         | t         | t       | t |   |
| a            | 4561786      | g            | 4739958      | nc                         | a                                    | CFT073                     | ++++                       | a                 | a   | a   | g       | a     | a        | a        | a    | a  | a      | a     | a       | a    | a     | a    | a     | a      | a        | a       | a        | a        | a         | a         | a       | a |   |
| t            | 4562418      | c            | 4740590      | nc                         | c                                    | clone D                    | ++++                       | c                 | c   | c   | c       | c     | c        | c        | c    | c  | c      | c     | c       | c    | c     | c    | c     | a      | c        | c       | c        | c        | c         | c         | c       | c |   |
| c            | 4562781      | t            | 4740953      | nc                         | t                                    | clone D                    | ++++                       | t                 | t   | t   | t       | t     | t        | t        | t    | t  | t      | t     | t       | t    | t     | t    | t     | t      | t        | t       | t        | t        | t         | t         | t       | t |   |
| g            | 4562983      | a            | 4741156      | nc                         | g                                    | CFT073                     | ++++                       | g                 | a   | g   | a       | g     | g        | g        | a    | g  | a      | a     | a       | g    | g     | g    | g     | a      | a        | a       | a        | a        | a         | a         | a       | a |   |
| c            | 4563030      | t            | 4741203      | nc                         | c                                    | CFT073                     | ++                         | c                 | a   | c   | t       | c     | c        | a        | t    | a  | a      | t     | c       | c    | a     | a    | a     | a      | t        | a       | a        | t        | t         | a         | a       | a |   |
| g            | 4563135      | a            | 4741308      | nc                         | g                                    | CFT073                     | ++++                       | g                 | a   | g   | a       | g     | g        | a        | a    | a  | a      | g     | a       | a    | a     | a    | a     | a      | a        | a       | a        | a        | a         | a         | a       | a | a |
| a            | 4563392      | c            | 4741565      | nc                         | a                                    | CFT073                     | ++++                       | a                 | a   | a   | c       | a     | a        | a        | a    | a  | a      | a     | a       | a    | a     | a    | a     | a      | a        | a       | a        | a        | a         | a         | a       | a |   |
| a            | 4564222      | g            | 4742395      | nc                         | a                                    | CFT073                     | ++++                       | a                 | a   | a   | g       | a     | a        | g        | g    | g  | a      | a     | g       | a    | g     | g    | a     | g      | g        | g       | g        | a        | a         | g         | g       | g |   |

| Clone D base | Clone D site | CFT 073 base | CFT 073 site | mutation type <sup>a</sup> | Inferred ancestral base <sup>b</sup> | lineage inferred to mutate | Support level <sup>c</sup> | ED1a <sup>d</sup> | 536 | S88 | APEC O1 | UT189 | E2348/69 | ATCC8739 | K-12 | HS | SMS3-5 | IAI39 | E24377A | SE11 | 55989 | IAI1 | Sakai | UMN026 | B4 Sb227 | F5 8401 | SS Ss046 | D1 Sd197 | B18 BS512 | F2a 2457T | F2a 301 |
|--------------|--------------|--------------|--------------|----------------------------|--------------------------------------|----------------------------|----------------------------|-------------------|-----|-----|---------|-------|----------|----------|------|----|--------|-------|---------|------|-------|------|-------|--------|----------|---------|----------|----------|-----------|-----------|---------|
| t            | 4564228      | c            | 4742402      | nc                         | t                                    | CFT073                     | ++++                       | t                 | t   | t   | c       | t     | t        | c        | c    | c  | t      | t     | c       | t    | c     | c    | t     | c      | c        | c       | c        | t        | t         | c         | c       |
| t            | 4564261      | c            | 4742435      | nc                         | t                                    | CFT073                     | ++++                       | t                 | t   | t   | c       | t     | t        | t        | c    | c  | c      | t     | t       | t    | t     | c    | t     | c      | t        | t       | c        | t        | t         | t         | t       |
| g            | 4564269      | t            | 4742443      | nc                         | g                                    | CFT073                     | ++++                       | g                 | g   | g   | t       | g     | g        | t        | t    | t  | t      | t     | t       | t    | t     | t    | t     | t      | t        | t       | t        | t        | t         | t         | t       |
| c            | 4564270      | g            | 4742444      | nc                         | c                                    | CFT073                     | ++                         | c                 | c   | c   | g       | c     | c        | g        | g    | g  | a      | a     | g       | a    | a     | g    | g     | g      | g        | g       | g        | a        | a         | g         | g       |
| g            | 4564279      | c            | 4742453      | nc                         | g                                    | CFT073                     | ++                         | g                 | g   | g   | c       | g     | g        | c        | c    | c  | t      | t     | c       | t    | t     | c    | c     | c      | t        | t       | c        | t        | t         | t         | t       |
| t            | 4564280      | a            | 4742454      | nc                         | t                                    | CFT073                     | ++++                       | t                 | t   | t   | a       | t     | t        | a        | a    | a  | a      | a     | a       | a    | a     | a    | a     | a      | a        | a       | a        | a        | a         | a         | a       |
| a            | 4564657      | c            | 4742831      | nc                         | c                                    | clone D                    | ++++                       | c                 | c   | c   | c       | c     | c        | c        | c    | c  | c      | c     | c       | c    | c     | c    | c     | c      | c        | c       | c        | c        | c         | c         | c       |
| c            | 4569851      | a            | 4748027      | ns                         | c                                    | CFT073                     | ++++                       | c                 | c   | c   | c       | c     | c        | c        | c    | c  | c      | c     | c       | c    | c     | c    | c     | c      | c        | c       | c        | c        | c         | c         | c       |
| c            | 4585244      | t            | 4763420      | s                          | c                                    | CFT073                     | ++                         | c                 | c   | c   | c       | c     | c        |          |      |    | c      | c     |         |      |       |      | c     | c      | c        | c       | c        |          | c         | c         | c       |
| t            | 4590689      | c            | 4768865      | ns                         | c                                    | clone D                    | ++++                       | c                 | c   | c   | c       | c     | c        | c        | c    | c  | c      | c     | c       | c    | c     | c    | c     | c      | c        | c       | c        | c        | c         | c         | c       |
| a            | 4602361      | t            | 4780537      | nc                         | a                                    | CFT073                     | ++                         | a                 | a   | a   | a       | a     | a        | a        | a    | a  | a      | a     | a       | a    | a     | a    | a     |        |          | a       | a        |          |           | a         | a       |
| c            | 4622406      | a            | 4800582      | s                          | c                                    | CFT073                     | +                          |                   |     | c   | c       | c     |          |          |      |    |        |       |         |      |       |      |       |        |          |         |          |          |           |           |         |
| t            | 4626099      | g            | 4804275      | s                          | t                                    | CFT073                     | ++++                       | t                 | t   | t   | t       | t     | t        | t        | t    | t  | t      | t     | t       | t    | t     | t    | t     | t      | t        | t       | t        | t        | t         | t         | t       |
| t            | 4627342      | g            | 4805518      | s                          | g                                    | clone D                    | +                          |                   | g   | g   | g       | g     | g        |          |      |    |        |       |         |      |       |      |       |        |          |         |          |          |           |           |         |
| t            | 4627905      | c            | 4806081      | s                          | c                                    | clone D                    | +                          |                   | c   | c   | c       | c     | c        |          |      |    |        |       |         |      |       |      |       |        |          |         |          |          |           |           |         |
| a            | 4631749      | g            | 4809925      | s                          | a                                    | CFT073                     | +++                        | a                 | a   | a   | a       | a     | a        |          |      |    |        |       |         |      |       |      |       |        |          |         |          |          |           |           |         |
| t            | 4633577      | a            | 4811753      | ns                         | t                                    | CFT073                     | +++                        | t                 | t   | t   | t       | t     | t        |          |      |    |        |       |         |      |       |      |       |        |          |         |          |          |           |           |         |
| t            | 4655252      | c            | 4833472      | s                          | c                                    | clone D                    | ++++                       | c                 | c   | c   | c       | c     | c        | c        | c    | c  | c      | c     | c       | c    | c     | c    | c     | c      | c        | c       | c        | c        | c         | c         | c       |
| c            | 4658923      | t            | 4837143      | ns                         | c                                    | CFT073                     | ++++                       | c                 | c   | c   | c       | c     | c        | c        | c    | c  | c      | c     | c       | c    | c     | c    | c     | c      | c        | c       | c        | c        | c         | c         | c       |
| t            | 4667340      | c            | 4845560      | s                          | c                                    | clone D                    | ++++                       | c                 | c   | c   | c       | c     | c        | c        | c    | c  | c      | c     | c       | c    | c     | c    | c     | c      | c        | c       | c        | c        | c         | c         | c       |
| c            | 4668303      | t            | 4846523      | ns                         | t                                    | clone D                    | ++++                       | t                 | t   | t   | t       | t     | t        | t        | t    | t  | t      | t     | t       | t    | t     | t    | t     | t      | t        | t       | t        | t        | t         | t         | t       |
| g            | 4671386      | a            | 4849606      | nc                         | a                                    | clone D                    | ++                         | a                 | a   |     |         |       | a        | a        |      |    |        |       |         |      |       |      |       |        |          |         |          |          |           |           |         |
| a            | 4681579      | t            | 4859788      | s                          | t                                    | clone D                    | ++                         | t                 | t   | t   | t       | t     | t        | t        | t    | t  | t      | t     | t       | t    | t     | t    | t     | t      | t        | t       | t        |          |           | t         | t       |
| c            | 4685538      | a            | 4863747      | nc                         | c                                    | CFT073                     | ++++                       | c                 | a   | c   | c       | c     | c        | c        | c    | c  | c      | c     | c       | c    | c     | c    | c     | a      | a        |         | c        |          |           |           |         |
| g            | 4685730      | a            | 4863939      | s                          | g                                    | CFT073                     | ++++                       | g                 | g   | g   | g       | g     | g        | g        | g    | g  | a      | g     | g       | g    | g     | g    | g     | g      | g        | g       | g        |          |           |           |         |
| t            | 4686261      | g            | 4864470      | ns                         | g                                    | clone D                    | ++                         | g                 | g   | g   | g       | g     | a        | g        | g    | g  | a      | g     | g       | g    | g     | g    | g     | g      | g        | g       | g        |          |           |           |         |
| c            | 4695657      | a            | 4873866      | ns                         | c                                    | CFT073                     | ++                         | c                 | c   | c   | c       | c     | c        | c        | c    | c  | c      | c     | c       | c    | c     | c    | c     | c      | c        | c       | c        | c        | c         |           |         |
| t            | 4695924      | g            | 4874133      | nc                         | t                                    | CFT073                     | ++                         | t                 | t   | t   | t       | t     | t        | t        | t    | t  | t      | t     | t       | t    | t     | t    | t     | t      | t        | t       | t        | t        |           |           |         |





| Clone D base | Clone D site | CFT 073 base | CFT 073 site | mutation type <sup>a</sup> | Inferred ancestral base <sup>b</sup> | lineage inferred to mutate | Support level <sup>c</sup> | ED1a <sup>d</sup> | 536 | S88 | APEC O1 | UTI89 | E2348/69 | ATCC8739 | K-12 | HS | SMS3-5 | IAI39 | E24377A | SE11 | 55989 | IAI1 | Sakai | UMN026 | B4 Sb227 | F5 8401 | SS Ss046 | D1 Sd197 | B18 BS512 | F2a 2457T | F2a 301 |   |
|--------------|--------------|--------------|--------------|----------------------------|--------------------------------------|----------------------------|----------------------------|-------------------|-----|-----|---------|-------|----------|----------|------|----|--------|-------|---------|------|-------|------|-------|--------|----------|---------|----------|----------|-----------|-----------|---------|---|
| c            | 5015018      | t            | 5207347      | s                          | c                                    | CFT073                     | ++++                       | c                 | c   | c   | c       | c     | c        | c        | c    | c  | c      | c     | c       | c    | c     | c    | c     | c      | c        | c       | c        | c        | c         | c         | c       | c |
| g            | 5019370      | a            | 5212411      | ns                         | g                                    | CFT073                     | ++                         | g                 | g   | g   | g       | g     |          |          | g    |    |        |       |         |      |       |      |       |        |          |         |          |          |           |           |         |   |

<sup>a</sup>s: synonymous; ns: non-synonymous; nc: in non-coding gene.

<sup>b</sup>The base present in ED1a OR if site absent in ED1a, the base in majority outgroup strains OR if base present in ED1a is not that in any of the clone D and CFT073 strains, the base in majority outgroup strains.

<sup>c</sup>Level of support for allocation of mutation as given in previous column.

"++++" agreement is high - 8 or more outgroup strains with expected base and at most 1 with an alternative base, and do not present alternative base in ED1a

"+++" agreement good - 4 or more outgroup strains with expected base and at most 1 with an alternative base, and do not present alternative base in ED1a

"++" agreement in ED1a regardless of situation with other outgroup strains

"+" no conflict but very limited support as either site absent in ED1a, and/or support is less than required for any of the higher levels of support

"+/-" no no conflict but no support (base not present in any outgroup OR base when present is not that in any of clone D and CFT073 strains OR both alternative lineages supported equally)

<sup>d</sup> "-" indicates absence of the base. Blank means the site not present.
