# Supplementary material for: Rates of Mutation and Host Transmission for an Escherichia coli Clone over 3 Years
Source: PubMed Central journal article supplement (PMC3203180; doi:10.1371/journal.pone.0026907), 2011-10-27
Supplement: pone.0026907.s010.pdf [file pone.0026907.s010.pdf]

**Table S9** Genbank accession numbers for genome sequences included in Figure 1.

| <b>Strain</b> | <b>Accession number</b> |
|---------------|-------------------------|
| 12009         | AP010958.1              |
| 55989         | CU928145.2              |
| W             | CP002185.1              |
| KO11          | CP002516.1              |
| E24377A       | CP000800.1              |
| SE11          | AP009240.1              |
| IAI1          | CU928160.2              |
| 11368         | AP010953.1              |
| 11128         | AP010960.1              |
| B(REL606)     | CP000819.1              |
| B (BL21(DE3)) | CP001509.3              |
| B(BL21(DE3))  | AM946981.2              |
| B(BL21(DE3))  | CP001665.1              |
| HS            | CP000802.1              |
| ATCC 8739     | CP000946.1              |
| UMNK88        | CP002729                |
| ECTC H10407   | FN649414.1              |
| UMNF18        | CP002890                |
| K12 (BW2952)  | CP001396.1              |
| K12 (DH1)     | CP001637.1              |
| K12 (DH1)     | AP012030.1              |
| K12 (DH10B)   | CP000948.1              |
| K12 (MG1655)  | U00096.2                |
| K12 (W3110)   | AP009048                |
| CB9615(O55)   | CP001846.1              |
| O157(EC4115)  | CP001164.1              |
| O157(EDL933)  | AE005174.2              |
| O157(Sakai)   | BA000007.2              |
| O157(TW14349) | CP001368.1              |
| UMN026        | CU928163                |
| 042           | FN554766.1              |
| SMS-3-5       | CP000970.1              |
| IAI39         | CU928164.2              |
| E2348/69      | FM180568.1              |
| SE15          | AP009378.1              |
| NA114         | CP002797.1              |
| clone D(i2)   | CP002211                |
| CFT073        | AE014075.1              |
| ABU 83972     | CP001671.1              |
| NRG 857C      | CP001855.1              |

|                                    |               |
|------------------------------------|---------------|
| LF82                               | CU651637.1    |
| 536                                | CP000247.1    |
| ED1a                               | CU928162.2    |
| clone A(i1)                        | AEYT000000000 |
| S88                                | CU928161.2    |
| APECO1                             | CP000468.1    |
| IHE3034                            | CP001969.1    |
| UTI89                              | CP000243.1    |
| UM146                              | CP002167.1    |
| SS Ss046( <i>Shigella</i> )        | CP000038.1    |
| B4 Sb227( <i>Shigella</i> )        | CP000036.1    |
| B18 BS512( <i>Shigella</i> )       | CP001063.1    |
| F5b Sf8401( <i>Shigella</i> )      | CP000266.1    |
| F2a 2457T( <i>Shigella</i> )       | AE014073.1    |
| Fxv 2002017( <i>Shigella</i> )     | CP001383.1    |
| D1 Sd197( <i>Shigella</i> )        | CP000034.1    |
| <i>E. fergusonii</i> ATCC<br>35469 | CU928158.2    |
